# Supplementary material for: Tissue specific imprinting on innate lymphoid cells during homeostasis and disease process revealed by integrative inference of single-cell transcriptomics
Source: Front Immunol. 2023 Mar 7;14:1127413. doi: 10.3389/fimmu.2023.1127413 (PMC10028295; doi:10.3389/fimmu.2023.1127413)
Supplement: Supplementary file 6 [file Table_2.xlsx]

## Sheet: ILC1_c1
Supplementary Table2: Differentially expressed genes across the 14 ILC clusters.
gene	p_val	avg_log2FC	pct.1	pct.2	p_val_adj	cluster	Is_TF	KEGG_CYTOKINE_CYTOKINE_RECEPTOR_INTERACTION	CYTOKINE
CD3D	0	1.64706	0.777	0.048	0	ILC1_c1
CCL5	2.02806e-62	1.61399	0.654	0.319	2.33937e-58	ILC1_c1		CCL5	CCL5
CD8A	2.14577e-176	1.55499	0.38	0.047	2.47515e-172	ILC1_c1
CD3E	1.89443e-176	1.32292	0.843	0.285	2.18523e-172	ILC1_c1
DJB1	8.5124e-12	1.25561	0.722	0.562	9.81905e-08	ILC1_c1
LCK	7.02759e-90	1.25012	0.687	0.321	8.10633e-86	ILC1_c1
LDHB	2.27103e-53	1.23019	0.687	0.439	2.61963e-49	ILC1_c1
GIMAP4	8.94896e-164	1.17874	0.532	0.107	1.03226e-159	ILC1_c1
FYB1	2.32043e-80	1.11663	0.708	0.345	2.67662e-76	ILC1_c1
DGKA	1.02628e-40	1.10637	0.571	0.316	1.18382e-36	ILC1_c1
FABP5	5.57695e-29	1.09996	0.172	0.053	6.43301e-25	ILC1_c1
TRAC	7.38035e-41	1.07696	0.597	0.371	8.51323e-37	ILC1_c1
GIMAP7	3.79587e-128	1.05233	0.673	0.216	4.37853e-124	ILC1_c1
CD3G	0	1.03515	0.497	0.019	0	ILC1_c1
TRBC2	9.98598e-41	1.00695	0.716	0.497	1.15188e-36	ILC1_c1
CST7	2.18425e-48	0.980331	0.479	0.201	2.51953e-44	ILC1_c1
BAG3	2.1525e-13	0.968885	0.198	0.097	2.48291e-09	ILC1_c1
LEF1	4.63019e-129	0.965842	0.395	0.073	5.34092e-125	ILC1_c1	Yes
CCR7	1.64244e-61	0.959522	0.448	0.162	1.89455e-57	ILC1_c1		CCR7
HLA-DPA1	5.49152e-15	0.9346	0.305	0.186	6.33447e-11	ILC1_c1
CD27	0	0.934048	0.571	0.026	0	ILC1_c1		CD27
SOD1	2.29859e-24	0.927432	0.644	0.445	2.65142e-20	ILC1_c1
CACYBP	5.68015e-09	0.92341	0.468	0.357	6.55205e-05	ILC1_c1
PTTG1	7.09908e-18	0.879715	0.131	0.045	8.18879e-14	ILC1_c1
FCMR	6.49595e-78	0.878471	0.597	0.243	7.49308e-74	ILC1_c1
LBH	2.42951e-128	0.847041	0.562	0.145	2.80244e-124	ILC1_c1
ITM2A	4.48654e-21	0.805614	0.45	0.278	5.17522e-17	ILC1_c1
FTL	8.00546e-13	0.802641	0.926	0.819	9.2343e-09	ILC1_c1
CNN2	7.06214e-99	0.798487	0.585	0.193	8.14618e-95	ILC1_c1
HLA-DPB1	2.55455e-29	0.788741	0.329	0.152	2.94668e-25	ILC1_c1
CD6	0	0.774241	0.483	0.036	0	ILC1_c1
SELL	9.88371e-50	0.766845	0.521	0.227	1.14009e-45	ILC1_c1
CHMP7	1.93914e-62	0.748918	0.393	0.13	2.2368e-58	ILC1_c1
LAG3	9.45939e-103	0.747164	0.211	0.023	1.09114e-98	ILC1_c1
COTL1	3.94475e-70	0.7439	0.585	0.238	4.55027e-66	ILC1_c1
NKG7	2.29388e-27	0.733432	0.448	0.23	2.64599e-23	ILC1_c1
B2M	1.08205e-66	0.72538	1	0.993	1.24814e-62	ILC1_c1
LAPTM5	8.58201e-37	0.694499	0.824	0.608	9.89935e-33	ILC1_c1
CORO1A	4.46809e-37	0.693585	0.773	0.567	5.15394e-33	ILC1_c1
CD4	1.38726e-224	0.677547	0.266	0.012	1.60021e-220	ILC1_c1
PPP1R2	9.78215e-16	0.640554	0.577	0.406	1.12837e-11	ILC1_c1
CCL4L2	1.86243e-12	0.640378	0.16	0.075	2.14831e-08	ILC1_c1		CCL4L2
CLEC2D	3.0197e-80	0.63889	0.658	0.283	3.48322e-76	ILC1_c1
HMGB2	8.3112e-25	0.637819	0.495	0.283	9.58697e-21	ILC1_c1
ID3	5.48983e-40	0.630382	0.186	0.046	6.33251e-36	ILC1_c1
GTF3A	1.60517e-35	0.624244	0.568	0.32	1.85157e-31	ILC1_c1	Yes
TRAT1	5.81294e-100	0.620732	0.423	0.1	6.70523e-96	ILC1_c1
TMSB10	5.56525e-40	0.619593	0.943	0.808	6.41952e-36	ILC1_c1
TUBA4A	1.86603e-37	0.612493	0.524	0.267	2.15246e-33	ILC1_c1
IFITM1	3.03086e-25	0.587371	0.886	0.677	3.4961e-21	ILC1_c1
OASL	7.58278e-18	0.586322	0.147	0.053	8.74673e-14	ILC1_c1
LITAF	9.41762e-68	0.584078	0.528	0.187	1.08632e-63	ILC1_c1
HSP90AA1	2.67276e-09	0.581807	0.885	0.904	3.08303e-05	ILC1_c1
GSTK1	1.95765e-30	0.578217	0.618	0.392	2.25815e-26	ILC1_c1
SIRPG	3.32464e-97	0.568714	0.256	0.038	3.83497e-93	ILC1_c1
TRAF3IP3	4.91921e-40	0.552888	0.581	0.315	5.67431e-36	ILC1_c1
HIST1H4C	3.25217e-13	0.551131	0.616	0.459	3.75138e-09	ILC1_c1
RPS3	2.47202e-33	0.550605	0.977	0.884	2.85147e-29	ILC1_c1
HSPA8	1.23358e-06	0.547538	0.961	0.864	0.0142294	ILC1_c1
TXNIP	5.27497e-28	0.545568	0.883	0.78	6.08467e-24	ILC1_c1
RIPOR2	1.38132e-32	0.536595	0.622	0.37	1.59336e-28	ILC1_c1
DENND2D	3.08603e-29	0.5356	0.487	0.266	3.55974e-25	ILC1_c1
NOSIP	1.29503e-66	0.515508	0.505	0.196	1.49382e-62	ILC1_c1
CD2	3.30618e-39	0.515107	0.699	0.397	3.81368e-35	ILC1_c1
DOK2	3.22064e-13	0.510348	0.378	0.24	3.71501e-09	ILC1_c1
SRRT	1.83076e-13	0.508564	0.389	0.248	2.11178e-09	ILC1_c1
CNBP	4.39146e-21	0.506111	0.728	0.563	5.06555e-17	ILC1_c1
TIGIT	9.88811e-44	0.502629	0.194	0.046	1.14059e-39	ILC1_c1
ITGB2	1.11382e-46	0.500951	0.679	0.347	1.28479e-42	ILC1_c1
MYL12A	8.92835e-20	0.499645	0.755	0.638	1.02989e-15	ILC1_c1
ACTB	4.79213e-25	0.496605	0.988	0.939	5.52772e-21	ILC1_c1
ARHGDIB	1.46634e-21	0.494369	0.871	0.81	1.69143e-17	ILC1_c1
LDLRAP1	1.42442e-79	0.494242	0.356	0.087	1.64307e-75	ILC1_c1
OAZ1	4.96199e-08	0.487494	0.847	0.725	0.000572366	ILC1_c1
ACTN1	9.46594e-86	0.486652	0.258	0.045	1.0919e-81	ILC1_c1
GZMA	2.10529e-41	0.483286	0.352	0.13	2.42846e-37	ILC1_c1
H2AFZ	2.80847e-07	0.482422	0.481	0.377	0.00323957	ILC1_c1
KC3	1.33597e-68	0.478632	0.288	0.066	1.54104e-64	ILC1_c1
ISG20	1.69453e-31	0.477534	0.56	0.302	1.95464e-27	ILC1_c1
PFDN5	1.11084e-16	0.468992	0.8	0.661	1.28135e-12	ILC1_c1
TOB1	8.25848e-15	0.460647	0.376	0.232	9.52615e-11	ILC1_c1
TC2N	8.51972e-58	0.460135	0.495	0.19	9.82749e-54	ILC1_c1
RPL21	8.32152e-08	0.447936	0.759	0.576	0.000959887	ILC1_c1
S1PR1	1.45909e-49	0.442399	0.333	0.107	1.68307e-45	ILC1_c1
SELPLG	1.48541e-34	0.440447	0.528	0.276	1.71342e-30	ILC1_c1
ARHGAP25	1.64103e-39	0.439426	0.401	0.165	1.89293e-35	ILC1_c1
PSMB9	5.24353e-31	0.433362	0.566	0.334	6.04842e-27	ILC1_c1
TRBC1	5.70726e-07	0.422182	0.806	0.638	0.00658332	ILC1_c1
NLRC5	7.77915e-49	0.417567	0.515	0.22	8.97325e-45	ILC1_c1
KLRC4	2.61604e-29	0.414907	0.166	0.047	3.0176e-25	ILC1_c1
CTSC	6.37812e-07	0.414738	0.386	0.289	0.00735716	ILC1_c1
SH2D1A	3.45374e-91	0.412431	0.346	0.071	3.98389e-87	ILC1_c1
THEMIS	1.35487e-21	0.410049	0.229	0.095	1.56285e-17	ILC1_c1
HCLS1	3.85513e-13	0.408795	0.636	0.496	4.44689e-09	ILC1_c1
LY9	3.94915e-32	0.405928	0.415	0.194	4.55534e-28	ILC1_c1
SERINC5	4.27083e-75	0.401817	0.393	0.107	4.9264e-71	ILC1_c1
ESYT1	1.84908e-10	0.399906	0.438	0.307	2.13292e-06	ILC1_c1
ARID5B	4.08897e-35	0.388001	0.432	0.193	4.71663e-31	ILC1_c1	Yes
CDC25B	2.11325e-61	0.387754	0.374	0.113	2.43763e-57	ILC1_c1
TBC1D10C	1.7648e-36	0.385912	0.564	0.305	2.0357e-32	ILC1_c1
HNRNPF	2.51203e-10	0.385139	0.481	0.356	2.89763e-06	ILC1_c1
BUB3	4.26864e-18	0.382534	0.479	0.301	4.92388e-14	ILC1_c1
PTPRC	3.29701e-23	0.382336	0.92	0.828	3.8031e-19	ILC1_c1
MAL	1.746e-213	0.378989	0.294	0.018	2.01401e-209	ILC1_c1
STK38	7.80061e-33	0.376607	0.393	0.175	8.998e-29	ILC1_c1
MT-ND6	8.73584e-20	0.375293	0.724	0.614	1.00768e-15	ILC1_c1
NUDC	1.08839e-08	0.375254	0.401	0.287	0.000125546	ILC1_c1
ARHGAP15	5.67011e-19	0.373653	0.614	0.415	6.54048e-15	ILC1_c1
SKAP1	1.01646e-16	0.372558	0.493	0.316	1.17249e-12	ILC1_c1
SARAF	2.56639e-07	0.372253	0.904	0.824	0.00296033	ILC1_c1
ACTG1	2.21203e-09	0.371372	0.922	0.82	2.55158e-05	ILC1_c1
NELL2	2.42289e-57	0.370441	0.256	0.061	2.79481e-53	ILC1_c1
COMMD6	5.34184e-21	0.367574	0.714	0.503	6.16181e-17	ILC1_c1
TNFRSF1B	1.56487e-09	0.366681	0.364	0.242	1.80508e-05	ILC1_c1		TNFRSF1B
SYNE2	1.60678e-32	0.365827	0.526	0.264	1.85342e-28	ILC1_c1
IL16	4.25951e-18	0.362891	0.491	0.308	4.91335e-14	ILC1_c1
SAP18	1.05506e-12	0.361763	0.593	0.433	1.21701e-08	ILC1_c1
SHISA5	1.11815e-27	0.360144	0.466	0.252	1.28979e-23	ILC1_c1
CAPN2	1.15572e-34	0.356744	0.387	0.165	1.33312e-30	ILC1_c1
CDC42SE2	8.86456e-14	0.355908	0.667	0.53	1.02253e-09	ILC1_c1
PSMB8	1.17206e-19	0.354875	0.481	0.304	1.35197e-15	ILC1_c1
CD28	1.58916e-85	0.35018	0.294	0.056	1.83309e-81	ILC1_c1
ARHGAP30	7.72996e-14	0.343465	0.472	0.316	8.91651e-10	ILC1_c1
CD48	7.56071e-17	0.342871	0.587	0.397	8.72128e-13	ILC1_c1
CAMK4	2.93909e-30	0.342627	0.397	0.178	3.39024e-26	ILC1_c1
RCAN3	1.12732e-32	0.342309	0.419	0.194	1.30037e-28	ILC1_c1
SAMHD1	2.13465e-23	0.342154	0.45	0.24	2.46232e-19	ILC1_c1
HNRNPLL	2.35835e-17	0.342013	0.274	0.136	2.72036e-13	ILC1_c1
ZAP70	2.1724e-19	0.33898	0.632	0.428	2.50586e-15	ILC1_c1
GRAP2	4.29961e-116	0.335849	0.307	0.046	4.9596e-112	ILC1_c1
RSEK	6.52968e-07	0.3332	0.46	0.339	0.00753199	ILC1_c1
ST6GAL1	1.78415e-41	0.331826	0.311	0.107	2.05802e-37	ILC1_c1
SP47	1.93865e-25	0.326536	0.204	0.072	2.23623e-21	ILC1_c1
UCP2	4.72504e-10	0.326182	0.622	0.477	5.45033e-06	ILC1_c1
COX7A2	1.84212e-15	0.320715	0.601	0.424	2.12488e-11	ILC1_c1
RHOB	5.46622e-07	0.319618	0.143	0.259	0.00630529	ILC1_c1
RHOH	3.03325e-18	0.316769	0.611	0.396	3.49885e-14	ILC1_c1
CMTM7	1.3964e-44	0.313616	0.317	0.105	1.61075e-40	ILC1_c1
ABLIM1	1.75128e-13	0.313044	0.474	0.31	2.0201e-09	ILC1_c1
WDR1	2.64826e-09	0.312307	0.497	0.373	3.05476e-05	ILC1_c1
PKM	7.45938e-10	0.308325	0.544	0.411	8.60439e-06	ILC1_c1
PIK3IP1	1.47696e-07	0.306817	0.609	0.492	0.00170367	ILC1_c1
SRP14	7.7503e-09	0.306081	0.746	0.607	8.93997e-05	ILC1_c1
NUCB2	3.64374e-32	0.302504	0.395	0.177	4.20306e-28	ILC1_c1
IKZF3	2.03524e-50	0.299474	0.429	0.153	2.34765e-46	ILC1_c1	Yes
GBP1	5.06905e-34	0.299133	0.233	0.074	5.84715e-30	ILC1_c1
BIN2	1.6049e-07	0.297084	0.524	0.408	0.00185125	ILC1_c1
ADD3	2.66887e-21	0.294001	0.462	0.259	3.07854e-17	ILC1_c1
CISH	1.32369e-48	0.293288	0.17	0.033	1.52688e-44	ILC1_c1
RPS14	2.83781e-17	0.293214	0.963	0.886	3.27342e-13	ILC1_c1
ARPC5	1.99881e-11	0.292405	0.497	0.361	2.30562e-07	ILC1_c1
ISCU	1.96638e-15	0.291675	0.466	0.302	2.26822e-11	ILC1_c1
MSL3	2.6687e-30	0.289642	0.272	0.103	3.07834e-26	ILC1_c1
GALM	1.23684e-24	0.289104	0.229	0.089	1.4267e-20	ILC1_c1
TNFSF8	7.31606e-68	0.287549	0.274	0.059	8.43908e-64	ILC1_c1		TNFSF8	TNFSF8
ERP29	5.74572e-12	0.28733	0.401	0.274	6.62769e-08	ILC1_c1
RPL13A	9.50057e-20	0.286874	0.945	0.855	1.09589e-15	ILC1_c1
SARS	8.89728e-11	0.286269	0.354	0.231	1.0263e-06	ILC1_c1
PAG1	1.59437e-24	0.285963	0.425	0.215	1.8391e-20	ILC1_c1
RGS10	4.89e-17	0.285884	0.307	0.166	5.64062e-13	ILC1_c1
CRIP1	2.66036e-16	0.285717	0.562	0.356	3.06872e-12	ILC1_c1
TMEM154	9.72661e-28	0.282979	0.166	0.049	1.12196e-23	ILC1_c1
CYFIP2	5.14158e-09	0.282262	0.523	0.377	5.93081e-05	ILC1_c1
CNTRL	1.7843e-16	0.281918	0.442	0.269	2.05819e-12	ILC1_c1
CAPZB	2.72645e-11	0.279713	0.62	0.478	3.14496e-07	ILC1_c1
CXCR3	1.57605e-82	0.279214	0.237	0.037	1.81798e-78	ILC1_c1		CXCR3
CCT3	2.88665e-12	0.278227	0.393	0.254	3.32976e-08	ILC1_c1
RASGRP1	9.18753e-27	0.278177	0.292	0.12	1.05978e-22	ILC1_c1
ATP6V0E1	1.62395e-10	0.275135	0.483	0.355	1.87322e-06	ILC1_c1
PPP1CC	1.35802e-10	0.275124	0.344	0.223	1.56647e-06	ILC1_c1
RASA3	8.44098e-44	0.274984	0.356	0.128	9.73667e-40	ILC1_c1
HLA-E	8.36761e-14	0.27355	0.975	0.918	9.65204e-10	ILC1_c1
LIMD2	6.52101e-23	0.271735	0.65	0.442	7.52199e-19	ILC1_c1
LGALS1	1.14268e-07	0.271496	0.309	0.206	0.00131808	ILC1_c1
PTPN6	1.65804e-06	0.271214	0.36	0.27	0.0191255	ILC1_c1
RPS25	1.22063e-10	0.270962	0.959	0.838	1.408e-06	ILC1_c1
PSME1	4.65383e-07	0.269924	0.742	0.63	0.0053682	ILC1_c1
SH3BGRL3	3.76721e-10	0.269016	0.851	0.727	4.34548e-06	ILC1_c1
MDH1	6.98477e-09	0.268772	0.323	0.219	8.05694e-05	ILC1_c1
LPAR6	5.23919e-25	0.268593	0.342	0.158	6.0434e-21	ILC1_c1
INPP4B	1.40821e-17	0.268122	0.427	0.244	1.62437e-13	ILC1_c1
SASH3	9.46899e-13	0.265632	0.431	0.284	1.09225e-08	ILC1_c1
NIN	5.1362e-16	0.26321	0.344	0.19	5.92461e-12	ILC1_c1
RTKN2	7.04954e-13	0.261787	0.2	0.1	8.13164e-09	ILC1_c1
BIN1	4.08824e-47	0.259509	0.36	0.126	4.71579e-43	ILC1_c1
EIF3H	5.24218e-07	0.258936	0.546	0.448	0.00604685	ILC1_c1
GPR171	1.30675e-16	0.257709	0.313	0.16	1.50733e-12	ILC1_c1
EDEM1	7.68202e-23	0.257056	0.358	0.179	8.86121e-19	ILC1_c1
LEPROTL1	1.49506e-08	0.257044	0.538	0.405	0.000172455	ILC1_c1
GZMM	1.00604e-56	0.25611	0.243	0.055	1.16047e-52	ILC1_c1
CASP1	9.94235e-18	0.255754	0.237	0.11	1.14685e-13	ILC1_c1
HCST	2.27169e-25	0.255603	0.636	0.377	2.6204e-21	ILC1_c1
RAC2	5.36612e-13	0.255284	0.751	0.611	6.18982e-09	ILC1_c1
STMN1	6.40598e-07	0.255086	0.207	0.133	0.00738929	ILC1_c1
ORMDL1	6.03404e-12	0.251925	0.387	0.252	6.96026e-08	ILC1_c1
CH25H	9.99023e-17	0.251838	0.106	0.032	1.15237e-12	ILC1_c1
ARL4C	6.1937e-25	0.251634	0.564	0.32	7.14443e-21	ILC1_c1
ABI3	1.25856e-21	0.251552	0.164	0.057	1.45175e-17	ILC1_c1
BCL11B	2.97286e-105	0.250698	0.477	0.111	3.42919e-101	ILC1_c1	Yes
BTN3A2	8.39221e-24	0.25014	0.583	0.349	9.68042e-20	ILC1_c1

## Sheet: ILC1_c2
gene	p_val	avg_log2FC	pct.1	pct.2	p_val_adj	cluster	Is_TF	KEGG_CYTOKINE_CYTOKINE_RECEPTOR_INTERACTION	CYTOKINE
JUND	2.33797e-50	2.3744	0.894	0.738	2.69685e-46	ILC1_c2	Yes
FOSB	2.76626e-49	2.19095	0.928	0.745	3.19088e-45	ILC1_c2	Yes
MT-ND3	2.21348e-58	2.09613	0.961	0.936	2.55325e-54	ILC1_c2
MT-ND1	2.33665e-59	2.08374	0.967	0.888	2.69532e-55	ILC1_c2
TPT1	3.31698e-56	1.9468	0.978	0.934	3.82614e-52	ILC1_c2
MT-ATP6	8.78457e-60	1.93326	0.994	0.969	1.0133e-55	ILC1_c2
KLRD1	2.81246e-24	1.91789	0.511	0.229	3.24417e-20	ILC1_c2
RPL23	1.27495e-50	1.90188	0.906	0.766	1.47065e-46	ILC1_c2
MT-ND4	1.46983e-70	1.89267	0.994	0.958	1.69545e-66	ILC1_c2
RPL27A	3.52789e-48	1.881	0.906	0.791	4.06942e-44	ILC1_c2
RPS11	3.6393e-47	1.82122	0.906	0.807	4.19793e-43	ILC1_c2
MT-ATP8	1.06123e-44	1.80499	0.9	0.677	1.22413e-40	ILC1_c2
RPS29	7.06751e-42	1.79668	0.933	0.867	8.15237e-38	ILC1_c2
RPS10	1.16901e-33	1.74309	0.728	0.5	1.34845e-29	ILC1_c2
MT-ND2	3.81463e-53	1.72126	0.972	0.922	4.40018e-49	ILC1_c2
RPS20	4.14952e-40	1.67537	0.883	0.787	4.78647e-36	ILC1_c2
GNLY	1.47535e-20	1.66909	0.589	0.326	1.70182e-16	ILC1_c2
IFITM2	1.16168e-34	1.64573	0.844	0.717	1.34e-30	ILC1_c2
TCF7	1.42747e-23	1.58549	0.678	0.499	1.64659e-19	ILC1_c2	Yes
KLF6	3.04838e-22	1.5492	0.906	0.907	3.51631e-18	ILC1_c2	Yes
CD81	1.13357e-29	1.5436	0.606	0.314	1.30758e-25	ILC1_c2
RPL31	3.4229e-38	1.53763	0.906	0.818	3.94831e-34	ILC1_c2
RPL38	7.70764e-39	1.45559	0.9	0.787	8.89077e-35	ILC1_c2
RPL27	1.80826e-28	1.44181	0.828	0.779	2.08583e-24	ILC1_c2
RPL37A	1.2163e-37	1.40008	0.944	0.86	1.40301e-33	ILC1_c2
DJC3	1.23114e-06	1.38027	0.117	0.302	0.0142012	ILC1_c2
PFN1	3.51434e-28	1.35705	0.856	0.831	4.05379e-24	ILC1_c2
ZNF302	8.91183e-22	1.34711	0.5	0.263	1.02798e-17	ILC1_c2	Yes
RPS6	4.75905e-40	1.32395	0.95	0.894	5.48957e-36	ILC1_c2
H1FX	2.67655e-14	1.32059	0.433	0.249	3.0874e-10	ILC1_c2
KLF2	8.7032e-09	1.31518	0.45	0.347	0.000100391	ILC1_c2	Yes
MT-CO3	7.42076e-46	1.3109	0.989	0.987	8.55985e-42	ILC1_c2
PPIA	3.25424e-14	1.30879	0.706	0.722	3.75376e-10	ILC1_c2
TRIM56	1.01313e-13	1.30483	0.411	0.231	1.16865e-09	ILC1_c2
RPL4	8.69724e-29	1.30401	0.833	0.8	1.00323e-24	ILC1_c2
TYROBP	1.21789e-16	1.29117	0.639	0.513	1.40483e-12	ILC1_c2
FOXN3	5.20111e-12	1.28945	0.489	0.36	5.99948e-08	ILC1_c2	Yes
RPL7	7.26166e-29	1.28492	0.744	0.423	8.37633e-25	ILC1_c2
EEF1A1	2.80873e-31	1.27367	0.978	0.987	3.23987e-27	ILC1_c2
RPS16	8.47221e-39	1.27297	0.922	0.816	9.77269e-35	ILC1_c2
GS	6.82226e-28	1.25054	0.817	0.692	7.86947e-24	ILC1_c2
FYN	6.60402e-13	1.24905	0.65	0.605	7.61774e-09	ILC1_c2
IFITM3	2.93325e-11	1.2399	0.506	0.396	3.38351e-07	ILC1_c2
RPLP2	4.58331e-35	1.23896	0.95	0.893	5.28685e-31	ILC1_c2
PTK2B	4.32486e-10	1.23143	0.522	0.424	4.98872e-06	ILC1_c2
CFL1	2.24086e-28	1.22783	0.878	0.805	2.58483e-24	ILC1_c2
VAMP2	8.51571e-17	1.21156	0.628	0.515	9.82287e-13	ILC1_c2
AK	3.26469e-09	1.19699	0.533	0.463	3.76582e-05	ILC1_c2	Yes
CFLAR	3.35286e-09	1.19437	0.556	0.48	3.86752e-05	ILC1_c2
TXK	1.70667e-14	1.19127	0.611	0.441	1.96864e-10	ILC1_c2
SNRNP70	6.29974e-13	1.18314	0.528	0.377	7.26675e-09	ILC1_c2
RPS9	7.70598e-19	1.16992	0.794	0.774	8.88885e-15	ILC1_c2
UBA52	7.77246e-20	1.16528	0.811	0.816	8.96553e-16	ILC1_c2
SNHG5	1.66902e-11	1.1611	0.644	0.621	1.92522e-07	ILC1_c2
HNRNPA1	3.59915e-16	1.16103	0.783	0.816	4.15163e-12	ILC1_c2
HLA-F	2.12756e-09	1.15594	0.633	0.682	2.45414e-05	ILC1_c2
RPL23A	4.42523e-21	1.15202	0.856	0.838	5.10451e-17	ILC1_c2
MT-ND5	6.44922e-32	1.1262	0.983	0.916	7.43917e-28	ILC1_c2
PABPC1	6.06239e-29	1.11548	0.961	0.944	6.99296e-25	ILC1_c2
ACTN4	3.30735e-09	1.11473	0.5	0.413	3.81503e-05	ILC1_c2
PCSK7	8.68109e-09	1.09298	0.328	0.189	0.000100136	ILC1_c2
HNRNPD	1.76651e-12	1.08964	0.511	0.363	2.03767e-08	ILC1_c2
CAP1	2.68213e-12	1.08934	0.561	0.454	3.09384e-08	ILC1_c2
RPL37	5.87508e-28	1.08425	0.933	0.881	6.77691e-24	ILC1_c2
RPS27A	5.27852e-31	1.0591	0.956	0.906	6.08877e-27	ILC1_c2
HLA-B	5.08723e-35	1.05722	0.994	0.982	5.86812e-31	ILC1_c2
H3F3A	1.14522e-18	1.04972	0.656	0.396	1.32101e-14	ILC1_c2
RBMS1	9.29964e-14	1.04734	0.617	0.49	1.07271e-09	ILC1_c2
JUN	8.77796e-17	1.03416	0.8	0.657	1.01254e-12	ILC1_c2	Yes
HNRNPH1	5.65379e-08	1.02926	0.728	0.738	0.000652165	ILC1_c2
GOLGA8B	4.83419e-09	1.02703	0.567	0.518	5.57624e-05	ILC1_c2
RPL35	8.61857e-13	1.02335	0.783	0.797	9.94152e-09	ILC1_c2
NCAM1	1.03696e-11	1.01301	0.383	0.212	1.19614e-07	ILC1_c2
CMIP	2.31248e-16	1.00401	0.367	0.165	2.66745e-12	ILC1_c2
RBPJ	4.37566e-08	1.00099	0.544	0.443	0.000504733	ILC1_c2	Yes
CAPNS1	5.80977e-09	0.992276	0.339	0.208	6.70157e-05	ILC1_c2
IKZF1	1.91435e-08	0.991062	0.6	0.547	0.00022082	ILC1_c2	Yes
HLA-A	1.54138e-28	0.990119	0.972	0.975	1.77799e-24	ILC1_c2
SMAP2	6.42976e-11	0.98906	0.6	0.52	7.41673e-07	ILC1_c2
P1L1	1.19547e-10	0.988475	0.65	0.62	1.37898e-06	ILC1_c2
TMSB4X	1.41094e-25	0.987499	0.928	0.922	1.62752e-21	ILC1_c2
NFATC2IP	1.07042e-08	0.979054	0.311	0.178	0.000123473	ILC1_c2
RPL13	4.91351e-27	0.974757	0.956	0.941	5.66773e-23	ILC1_c2
ARID1A	8.49247e-09	0.972952	0.472	0.368	9.79606e-05	ILC1_c2
IL2RG	4.3597e-11	0.972503	0.717	0.782	5.02891e-07	ILC1_c2		IL2RG	IL2RG
H2AFY	3.74798e-08	0.972234	0.5	0.415	0.00043233	ILC1_c2
MT-CO2	1.00764e-32	0.957179	1	0.992	1.16231e-28	ILC1_c2
RPL15	1.70286e-15	0.949003	0.839	0.851	1.96425e-11	ILC1_c2
IRF1	3.64515e-06	0.947036	0.656	0.635	0.0420469	ILC1_c2	Yes
TMIGD2	2.49106e-06	0.934458	0.406	0.336	0.0287344	ILC1_c2
CD7	1.46262e-06	0.928617	0.611	0.613	0.0168714	ILC1_c2
CELF2	2.6935e-09	0.910112	0.7	0.671	3.10695e-05	ILC1_c2
RPL10A	9.55008e-12	0.909186	0.756	0.795	1.1016e-07	ILC1_c2
DOCK7	3.09936e-11	0.890752	0.25	0.108	3.57511e-07	ILC1_c2
AAK1	1.77979e-10	0.886469	0.611	0.536	2.05298e-06	ILC1_c2
POLR2J3	4.49486e-12	0.883719	0.339	0.171	5.18482e-08	ILC1_c2
CCNI	2.17021e-09	0.880034	0.7	0.695	2.50334e-05	ILC1_c2
AREG	4.4496e-08	0.877346	0.672	0.612	0.000513261	ILC1_c2
RPS6KA3	4.63201e-08	0.873869	0.533	0.459	0.000534302	ILC1_c2
ITGAX	3.23351e-08	0.867628	0.278	0.15	0.000372986	ILC1_c2
ZFP36L2	5.86319e-17	0.866942	0.933	0.953	6.76319e-13	ILC1_c2
HLA-C	2.51642e-22	0.856236	0.978	0.977	2.90269e-18	ILC1_c2
EIF4B	8.82207e-07	0.846206	0.572	0.587	0.0101763	ILC1_c2
RPS2	1.03755e-16	0.83782	0.889	0.876	1.19682e-12	ILC1_c2
RPS21	9.01403e-14	0.837039	0.822	0.833	1.03977e-09	ILC1_c2
KLRB1	1.63405e-12	0.828862	0.822	0.76	1.88487e-08	ILC1_c2
IL7R	2.36531e-16	0.828303	0.961	0.833	2.72839e-12	ILC1_c2		IL7R	IL7R
FKBP5	7.11353e-13	0.826075	0.639	0.491	8.20546e-09	ILC1_c2
RPS18	1.97945e-13	0.825178	0.828	0.874	2.2833e-09	ILC1_c2
ACTB	2.69621e-17	0.82019	0.972	0.942	3.11008e-13	ILC1_c2
MPV17L	2.84001e-10	0.816253	0.272	0.131	3.27596e-06	ILC1_c2
ETS1	3.48422e-06	0.808844	0.622	0.61	0.0401905	ILC1_c2	Yes
RPLP1	6.12006e-25	0.803977	0.978	0.964	7.05949e-21	ILC1_c2
RPS24	1.15412e-19	0.771738	0.911	0.886	1.33127e-15	ILC1_c2
MAVS	5.06449e-08	0.768632	0.278	0.156	0.000584189	ILC1_c2
GSN	1.29254e-06	0.767223	0.422	0.311	0.0149094	ILC1_c2
RPL5	1.06359e-12	0.734726	0.856	0.855	1.22685e-08	ILC1_c2
RPL26	2.40484e-15	0.720966	0.85	0.823	2.77398e-11	ILC1_c2
RPS25	3.93079e-12	0.703856	0.806	0.849	4.53416e-08	ILC1_c2
RPL41	1.0978e-25	0.697711	0.978	0.959	1.26631e-21	ILC1_c2
HLA-E	2.4564e-10	0.68814	0.883	0.923	2.83346e-06	ILC1_c2
ZKSCAN1	1.12582e-06	0.68784	0.311	0.201	0.0129863	ILC1_c2	Yes
RPL30	2.63441e-20	0.670449	0.922	0.9	3.03879e-16	ILC1_c2
SEMA3A	2.64041e-13	0.65553	0.1	0.02	3.04571e-09	ILC1_c2
RPL3	1.17714e-07	0.652222	0.856	0.863	0.00135783	ILC1_c2
RFLNB	3.62083e-07	0.646445	0.244	0.133	0.00417663	ILC1_c2
UNC93B1	2.35175e-06	0.63861	0.222	0.123	0.0271275	ILC1_c2
CALM1	2.40377e-07	0.620183	0.789	0.824	0.00277275	ILC1_c2
UBALD2	2.20852e-06	0.615674	0.233	0.13	0.0254753	ILC1_c2
MT-CYB	1.78439e-17	0.613182	1	0.977	2.0583e-13	ILC1_c2
MAP3K12	9.45975e-10	0.608978	0.206	0.084	1.09118e-05	ILC1_c2
RPS5	3.51606e-07	0.605565	0.756	0.782	0.00405577	ILC1_c2
DYNLL2	5.77829e-07	0.59079	0.217	0.112	0.00666525	ILC1_c2
RPS12	4.05131e-21	0.586735	0.944	0.892	4.67319e-17	ILC1_c2
TMA7	1.16704e-06	0.576535	0.372	0.24	0.0134618	ILC1_c2
PTMA	5.58411e-09	0.575268	0.844	0.928	6.44127e-05	ILC1_c2
RACK1	1.5837e-06	0.572872	0.839	0.81	0.018268	ILC1_c2
ESCO2	1.69588e-10	0.572727	0.133	0.039	1.9562e-06	ILC1_c2
RPL34	1.82339e-22	0.567255	0.95	0.91	2.10328e-18	ILC1_c2
RPS19	1.3589e-12	0.566795	0.872	0.894	1.56749e-08	ILC1_c2
HELLPAR	1.35855e-13	0.565435	0.15	0.04	1.56708e-09	ILC1_c2
CAC1A	7.41035e-11	0.564664	0.156	0.049	8.54783e-07	ILC1_c2
TSC22D3	5.42868e-13	0.562979	0.95	0.898	6.26198e-09	ILC1_c2
RPL35A	2.48443e-10	0.55114	0.811	0.843	2.86579e-06	ILC1_c2
RPS28	7.44619e-17	0.526628	0.867	0.758	8.58918e-13	ILC1_c2
RPS23	2.46739e-11	0.510916	0.833	0.852	2.84613e-07	ILC1_c2
EREG	1.72766e-06	0.510502	0.122	0.047	0.0199286	ILC1_c2
RPS14	5.09602e-12	0.508742	0.922	0.891	5.87826e-08	ILC1_c2
ATAD3C	2.04528e-14	0.502056	0.15	0.038	2.35923e-10	ILC1_c2
EIF1	2.22779e-06	0.492009	0.933	0.951	0.0256975	ILC1_c2
RPL11	5.39793e-14	0.476111	0.911	0.912	6.22651e-10	ILC1_c2
NUDT3	3.02248e-08	0.475475	0.183	0.076	0.000348644	ILC1_c2
NFKBIA	8.80775e-08	0.475292	0.95	0.894	0.00101597	ILC1_c2
PPP1CB	1.22641e-11	0.471615	0.25	0.588	1.41466e-07	ILC1_c2
RPL19	2.03484e-10	0.458609	0.856	0.895	2.34719e-06	ILC1_c2
ARL5B	3.43057e-06	0.445889	0.061	0.208	0.0395716	ILC1_c2
LRRC75A	4.2314e-07	0.432715	0.111	0.038	0.00488092	ILC1_c2
CXCR4	4.24209e-11	0.405054	0.861	0.801	4.89325e-07	ILC1_c2		CXCR4
RPL39	6.19926e-18	0.404903	0.9	0.845	7.15085e-14	ILC1_c2
RPL32	5.59002e-17	0.401146	0.911	0.901	6.44809e-13	ILC1_c2
AP000936.1	8.1255e-11	0.397749	0.106	0.026	9.37276e-07	ILC1_c2
RPL14	2.05881e-06	0.392301	0.783	0.853	0.0237484	ILC1_c2
RPS4X	5.60293e-08	0.386605	0.844	0.84	0.000646298	ILC1_c2
DDX51	5.96262e-07	0.379292	0.15	0.062	0.00687788	ILC1_c2
PLEKHD1	2.2328e-09	0.376991	0.139	0.044	2.57554e-05	ILC1_c2
CENPB	3.06769e-08	0.375867	0.156	0.06	0.000353858	ILC1_c2	Yes
RPS13	5.64185e-10	0.37501	0.8	0.849	6.50788e-06	ILC1_c2
RPS15A	2.50455e-13	0.370628	0.878	0.861	2.889e-09	ILC1_c2
RPS15	2.0048e-07	0.370595	0.783	0.859	0.00231253	ILC1_c2
CAV2	4.67093e-11	0.362493	0.072	0.013	5.38792e-07	ILC1_c2
CDC42SE2	6.66282e-09	0.360107	0.244	0.548	7.68556e-05	ILC1_c2
MOB1A	1.18833e-06	0.354689	0.144	0.359	0.0137074	ILC1_c2
ZNF34	7.96906e-12	0.350172	0.039	0.279	9.19231e-08	ILC1_c2	Yes
THAP5	3.13838e-10	0.349077	0.094	0.022	3.62013e-06	ILC1_c2	Yes
HCG11	2.89144e-06	0.343701	0.111	0.042	0.0333527	ILC1_c2
DUSP1	2.93662e-10	0.342829	0.911	0.862	3.38739e-06	ILC1_c2
WDR66	3.34827e-07	0.34076	0.083	0.024	0.00386223	ILC1_c2
ICOSLG	9.02716e-07	0.340502	0.089	0.028	0.0104128	ILC1_c2
CCDC26	1.26394e-07	0.336181	0.083	0.023	0.00145796	ILC1_c2
TXNIP	2.10751e-07	0.324772	0.867	0.785	0.00243102	ILC1_c2
RPS3	1.28023e-07	0.319893	0.9	0.89	0.00147674	ILC1_c2
GRHL1	2.48088e-06	0.318651	0.133	0.054	0.028617	ILC1_c2	Yes
RPS8	2.00915e-11	0.308582	0.856	0.864	2.31755e-07	ILC1_c2
ZNF394	4.36442e-07	0.302258	0.128	0.344	0.00503436	ILC1_c2	Yes
C2CD2L	6.19919e-07	0.279085	0.072	0.019	0.00715077	ILC1_c2
BRD8	8.6885e-14	0.263499	0.167	0.522	1.00222e-09	ILC1_c2

## Sheet: ILC2_c1
gene	p_val	avg_log2FC	pct.1	pct.2	p_val_adj	cluster	Is_TF	KEGG_CYTOKINE_CYTOKINE_RECEPTOR_INTERACTION	CYTOKINE
LDHB	8.70463e-43	1.20805	0.751	0.445	1.00408e-38	ILC2_c1
SELL	7.38001e-47	1.15346	0.586	0.234	8.51284e-43	ILC2_c1
NHSL2	7.81916e-43	1.03083	0.471	0.196	9.0194e-39	ILC2_c1
KLRG1	3.74432e-101	0.908901	0.549	0.119	4.31907e-97	ILC2_c1
IL10RA	4.54915e-68	0.889949	0.808	0.32	5.24745e-64	ILC2_c1		IL10RA
S100A4	1.26375e-32	0.887892	0.869	0.667	1.45773e-28	ILC2_c1
TNFSF10	1.09654e-79	0.887696	0.657	0.208	1.26485e-75	ILC2_c1		TNFSF10	TNFSF10
AHK	9.62017e-27	0.872876	0.832	0.57	1.10969e-22	ILC2_c1
TXNIP	3.53874e-33	0.859695	0.936	0.78	4.08193e-29	ILC2_c1
GIMAP7	8.14899e-59	0.846971	0.633	0.234	9.39986e-55	ILC2_c1
PTGER2	1.03173e-52	0.84592	0.609	0.224	1.1901e-48	ILC2_c1
S1PR1	8.27579e-63	0.778893	0.431	0.11	9.54613e-59	ILC2_c1
KLRB1	4.00568e-22	0.705302	0.926	0.754	4.62055e-18	ILC2_c1
ANXA1	4.19599e-33	0.704549	0.919	0.673	4.84007e-29	ILC2_c1
TESPA1	6.54044e-34	0.651479	0.636	0.308	7.5444e-30	ILC2_c1
IL32	3.4604e-38	0.648698	0.943	0.594	3.99157e-34	ILC2_c1
SAMHD1	1.353e-35	0.628506	0.556	0.243	1.56069e-31	ILC2_c1
EMP3	3.27976e-58	0.625396	0.771	0.328	3.78321e-54	ILC2_c1
S100A6	7.84506e-28	0.60365	0.838	0.538	9.04927e-24	ILC2_c1
PDCD4	1.73981e-19	0.598245	0.785	0.557	2.00687e-15	ILC2_c1
RPL8	7.54539e-14	0.591944	0.949	0.878	8.70361e-10	ILC2_c1
CAPN2	1.50391e-50	0.590832	0.512	0.166	1.73476e-46	ILC2_c1
GATA3	8.95332e-30	0.585276	0.892	0.556	1.03276e-25	ILC2_c1	Yes
MT-ND5	4.61571e-11	0.555548	0.923	0.917	5.32422e-07	ILC2_c1
SLFN5	4.42832e-27	0.551855	0.626	0.325	5.10807e-23	ILC2_c1
FSTL4	3.15722e-79	0.549009	0.347	0.058	3.64185e-75	ILC2_c1
SLAMF1	9.93583e-29	0.542776	0.552	0.246	1.1461e-24	ILC2_c1
MT-CYB	1.02837e-09	0.534422	0.983	0.978	1.18623e-05	ILC2_c1
LPAR6	7.52019e-34	0.533992	0.428	0.161	8.67454e-30	ILC2_c1
GSTK1	3.32113e-23	0.518548	0.653	0.398	3.83093e-19	ILC2_c1
CD200R1	2.31712e-34	0.513955	0.391	0.138	2.6728e-30	ILC2_c1
GMPR2	2.57816e-22	0.510189	0.276	0.103	2.97391e-18	ILC2_c1
ESYT1	1.03488e-11	0.504853	0.475	0.309	1.19373e-07	ILC2_c1
CCR2	3.94672e-58	0.503943	0.195	0.026	4.55254e-54	ILC2_c1		CCR2	CCR2
MYC	3.06344e-39	0.500674	0.468	0.165	3.53368e-35	ILC2_c1	Yes
MYL12A	3.36621e-21	0.498021	0.822	0.639	3.88292e-17	ILC2_c1
GTF3A	2.02317e-22	0.494361	0.576	0.328	2.33372e-18	ILC2_c1	Yes
RPL5	6.06959e-17	0.493928	0.929	0.852	7.00128e-13	ILC2_c1
VCL	2.24513e-41	0.492458	0.34	0.096	2.58976e-37	ILC2_c1
EIF3L	4.49581e-13	0.487029	0.596	0.408	5.18592e-09	ILC2_c1
CYFIP2	2.37937e-13	0.478552	0.586	0.379	2.74461e-09	ILC2_c1
CD40LG	1.42916e-26	0.47355	0.316	0.113	1.64853e-22	ILC2_c1		CD40LG
ERN1	2.49104e-19	0.471975	0.832	0.558	2.87341e-15	ILC2_c1
RIPOR2	1.15325e-27	0.471171	0.687	0.375	1.33027e-23	ILC2_c1
RPN1	1.18031e-12	0.469496	0.529	0.352	1.36148e-08	ILC2_c1
CDC25B	4.42287e-49	0.461725	0.418	0.12	5.10179e-45	ILC2_c1
HPGD	4.37828e-47	0.4605	0.515	0.165	5.05035e-43	ILC2_c1
RPLP0	1.0531e-09	0.460061	0.939	0.859	1.21475e-05	ILC2_c1
RPL18	2.20703e-06	0.453516	0.916	0.85	0.0254581	ILC2_c1
CNBP	8.42343e-12	0.453053	0.744	0.568	9.71642e-08	ILC2_c1
SORL1	1.95565e-12	0.452168	0.633	0.434	2.25584e-08	ILC2_c1
TMBIM1	1.9457e-15	0.442867	0.397	0.208	2.24436e-11	ILC2_c1
RPL3	2.54082e-18	0.440401	0.953	0.859	2.93084e-14	ILC2_c1
PAG1	3.71525e-38	0.438791	0.545	0.217	4.28554e-34	ILC2_c1
BIN2	1.09192e-15	0.435394	0.63	0.407	1.25953e-11	ILC2_c1
CD84	6.55756e-26	0.43474	0.411	0.172	7.56415e-22	ILC2_c1
PSMB8	3.02666e-20	0.434272	0.539	0.308	3.49125e-16	ILC2_c1
GIMAP4	2.13159e-23	0.429781	0.337	0.131	2.45879e-19	ILC2_c1
ARHGAP15	3.56988e-21	0.429017	0.69	0.418	4.11785e-17	ILC2_c1
CISH	6.45315e-40	0.428329	0.195	0.036	7.44371e-36	ILC2_c1
C1orf162	2.79296e-34	0.427608	0.492	0.194	3.22168e-30	ILC2_c1
RCBTB2	8.7807e-28	0.424588	0.36	0.134	1.01285e-23	ILC2_c1
GDPD5	1.38042e-76	0.417097	0.411	0.082	1.59231e-72	ILC2_c1
LDHA	8.68168e-19	0.416779	0.771	0.523	1.00143e-14	ILC2_c1
MBOAT2	2.21719e-43	0.412158	0.354	0.097	2.55753e-39	ILC2_c1
PHTF2	1.58156e-20	0.411178	0.576	0.306	1.82433e-16	ILC2_c1
MT-ND6	3.07589e-10	0.410654	0.697	0.619	3.54803e-06	ILC2_c1
TNFAIP8	9.91784e-19	0.410628	0.582	0.339	1.14402e-14	ILC2_c1
FDFT1	9.88405e-24	0.410517	0.465	0.222	1.14013e-19	ILC2_c1
TRAT1	6.22149e-44	0.409375	0.387	0.113	7.17649e-40	ILC2_c1
ANXA5	2.15645e-19	0.40656	0.411	0.197	2.48747e-15	ILC2_c1
CSGALCT1	3.60884e-69	0.399922	0.333	0.062	4.1628e-65	ILC2_c1
SELPLG	3.4842e-30	0.39557	0.599	0.281	4.01903e-26	ILC2_c1
LY6E	2.14625e-21	0.390727	0.697	0.384	2.4757e-17	ILC2_c1
DDOST	5.47806e-11	0.388049	0.488	0.326	6.31895e-07	ILC2_c1
SERINC5	3.55852e-47	0.386699	0.407	0.115	4.10475e-43	ILC2_c1
TSPAN2	6.39865e-39	0.385301	0.279	0.071	7.38084e-35	ILC2_c1
FL	5.89297e-13	0.382189	0.684	0.497	6.79754e-09	ILC2_c1
RACK1	1.99019e-10	0.381435	0.916	0.806	2.29569e-06	ILC2_c1
RPN2	5.43187e-08	0.379243	0.539	0.409	0.000626566	ILC2_c1
MAF	3.79099e-34	0.378731	0.589	0.259	4.37291e-30	ILC2_c1	Yes
IL17RB	3.87464e-28	0.377893	0.273	0.083	4.4694e-24	ILC2_c1		IL17RB
GAB	3.85055e-06	0.376567	0.364	0.262	0.0444161	ILC2_c1
S100A10	6.98547e-31	0.376526	0.771	0.434	8.05774e-27	ILC2_c1
B2M	2.90816e-17	0.375594	1	0.993	3.35456e-13	ILC2_c1
MRFAP1L1	9.52181e-14	0.369023	0.367	0.198	1.09834e-09	ILC2_c1
ARPC2	7.17573e-13	0.368406	0.882	0.747	8.2772e-09	ILC2_c1
PMPCB	9.69801e-08	0.367281	0.33	0.211	0.00111867	ILC2_c1
ITK	2.63378e-16	0.357565	0.589	0.343	3.03807e-12	ILC2_c1
IL2RA	1.09348e-23	0.355542	0.465	0.211	1.26133e-19	ILC2_c1		IL2RA
SCART1	2.043e-45	0.354494	0.397	0.117	2.3566e-41	ILC2_c1
FAM107B	8.17185e-10	0.353722	0.616	0.421	9.42622e-06	ILC2_c1
KIF3A	4.16895e-22	0.351989	0.303	0.115	4.80889e-18	ILC2_c1
ANTXR2	9.64698e-22	0.348008	0.256	0.089	1.11278e-17	ILC2_c1
CHDH	7.544e-41	0.347209	0.226	0.046	8.702e-37	ILC2_c1
HINT1	1.55922e-12	0.345741	0.754	0.541	1.79857e-08	ILC2_c1
RPS3	1.83102e-07	0.345504	0.933	0.889	0.00211208	ILC2_c1
IL6R	1.30836e-54	0.345311	0.229	0.037	1.5092e-50	ILC2_c1		IL6R
STT3A	9.83919e-10	0.34415	0.34	0.2	1.13495e-05	ILC2_c1
SSR2	7.82234e-13	0.342483	0.65	0.453	9.02307e-09	ILC2_c1
EIF3D	1.54512e-07	0.34053	0.498	0.356	0.00178229	ILC2_c1
FCRL3	5.12035e-15	0.340464	0.189	0.068	5.90633e-11	ILC2_c1
MSRB3	8.35002e-32	0.338817	0.219	0.053	9.63175e-28	ILC2_c1
ARHGEF6	1.02075e-09	0.337968	0.421	0.263	1.17743e-05	ILC2_c1
HERC1	8.28958e-09	0.334898	0.606	0.421	9.56203e-05	ILC2_c1
MIF	6.52887e-08	0.334812	0.667	0.461	0.000753106	ILC2_c1
RPA2	3.35221e-06	0.334632	0.296	0.194	0.0386677	ILC2_c1
GRAP2	1.67553e-60	0.332428	0.296	0.055	1.93272e-56	ILC2_c1
INPP4B	5.3011e-30	0.331718	0.549	0.244	6.11482e-26	ILC2_c1
GLRX	9.62025e-46	0.329354	0.505	0.168	1.1097e-41	ILC2_c1
SETX	1.22078e-07	0.328199	0.525	0.373	0.00140817	ILC2_c1
SYTL1	2.76571e-26	0.327925	0.549	0.272	3.19024e-22	ILC2_c1
CANX	7.44246e-09	0.325548	0.636	0.468	8.58488e-05	ILC2_c1
TMED2	1.3388e-13	0.324356	0.63	0.407	1.54431e-09	ILC2_c1
ADD3	1.62356e-17	0.323748	0.492	0.264	1.87278e-13	ILC2_c1
SARS	1.49683e-10	0.323055	0.387	0.233	1.72659e-06	ILC2_c1
TRAF3IP3	4.0983e-20	0.320635	0.582	0.324	4.72739e-16	ILC2_c1
ANXA2	1.5035e-20	0.320482	0.337	0.139	1.73429e-16	ILC2_c1
RPL13A	2.3551e-11	0.320099	0.929	0.859	2.71661e-07	ILC2_c1
GPR183	9.55656e-10	0.318155	0.579	0.405	1.10235e-05	ILC2_c1
GLIPR2	1.79646e-19	0.316699	0.475	0.238	2.07221e-15	ILC2_c1
LEF1	5.97226e-50	0.314769	0.354	0.086	6.889e-46	ILC2_c1	Yes
SOS1	4.07307e-17	0.31334	0.455	0.233	4.69829e-13	ILC2_c1
MBNL2	5.95283e-16	0.313279	0.434	0.222	6.86659e-12	ILC2_c1	Yes
SPTBN1	5.91359e-17	0.313071	0.428	0.213	6.82132e-13	ILC2_c1
ARF1	1.3062e-09	0.310857	0.727	0.551	1.5067e-05	ILC2_c1
CRBN	1.07614e-19	0.310769	0.465	0.233	1.24133e-15	ILC2_c1
TIMP1	3.02448e-12	0.310316	0.549	0.352	3.48873e-08	ILC2_c1
FRY	6.84282e-26	0.30569	0.448	0.194	7.89319e-22	ILC2_c1
FAM102A	4.63188e-23	0.305474	0.556	0.275	5.34287e-19	ILC2_c1
CD48	3.44233e-13	0.303582	0.623	0.402	3.97073e-09	ILC2_c1
KLF12	7.73499e-20	0.303042	0.502	0.27	8.92231e-16	ILC2_c1	Yes
APBB1IP	2.76665e-18	0.301714	0.549	0.304	3.19133e-14	ILC2_c1
DPP4	7.23783e-18	0.301635	0.418	0.199	8.34884e-14	ILC2_c1
MYL12B	2.26112e-12	0.301558	0.724	0.545	2.60821e-08	ILC2_c1
PSME1	3.29096e-09	0.299186	0.778	0.632	3.79612e-05	ILC2_c1
PLP2	4.42105e-18	0.298756	0.596	0.347	5.09969e-14	ILC2_c1
PDLIM5	6.19144e-27	0.294014	0.37	0.138	7.14183e-23	ILC2_c1
TNFRSF19	2.28571e-41	0.292372	0.138	0.018	2.63657e-37	ILC2_c1		TNFRSF19
A2M	1.50523e-106	0.290543	0.455	0.08	1.73629e-102	ILC2_c1
MT-ND4L	3.34378e-08	0.290292	0.936	0.924	0.000385706	ILC2_c1
TRIB2	4.43494e-14	0.28872	0.481	0.282	5.11571e-10	ILC2_c1
ANXA6	3.76559e-08	0.287356	0.589	0.432	0.00043436	ILC2_c1
CAPG	2.65904e-12	0.286311	0.542	0.336	3.0672e-08	ILC2_c1
FTL	2.01624e-08	0.285527	0.909	0.823	0.000232573	ILC2_c1
APC5	7.07911e-08	0.28485	0.485	0.34	0.000816575	ILC2_c1
ANO6	1.86096e-10	0.28162	0.259	0.13	2.14661e-06	ILC2_c1
KIAA0040	9.35006e-13	0.281584	0.168	0.063	1.07853e-08	ILC2_c1
ADAM19	1.02793e-34	0.277886	0.576	0.255	1.18571e-30	ILC2_c1
ADAR	3.07555e-08	0.277422	0.579	0.409	0.000354765	ILC2_c1
NME2	1.95935e-06	0.277284	0.189	0.103	0.0226011	ILC2_c1	Yes
PLEC	1.15661e-23	0.27614	0.545	0.281	1.33415e-19	ILC2_c1
CCT3	4.72242e-07	0.27518	0.387	0.259	0.00544731	ILC2_c1
RASA3	9.16903e-26	0.273152	0.36	0.136	1.05765e-21	ILC2_c1
CNN2	2.97147e-27	0.272747	0.495	0.211	3.42759e-23	ILC2_c1
TRABD2A	4.56816e-44	0.269471	0.259	0.056	5.26938e-40	ILC2_c1
TRIM21	7.5449e-08	0.269295	0.152	0.071	0.000870304	ILC2_c1
TLE4	7.03561e-13	0.264186	0.525	0.3	8.11557e-09	ILC2_c1
DDX1	1.71065e-08	0.263733	0.266	0.146	0.000197323	ILC2_c1
ARL4A	1.63836e-07	0.263126	0.481	0.334	0.00188985	ILC2_c1
TMEM59	6.07621e-09	0.260113	0.596	0.437	7.0089e-05	ILC2_c1
TRIM27	2.67208e-07	0.259169	0.253	0.146	0.00308224	ILC2_c1
SCFD1	3.18007e-11	0.257693	0.357	0.197	3.66821e-07	ILC2_c1
ACP1	2.42152e-11	0.257638	0.377	0.217	2.79323e-07	ILC2_c1
IFIT3	2.57372e-25	0.256717	0.128	0.024	2.96878e-21	ILC2_c1
EIF3A	2.53362e-06	0.256276	0.562	0.421	0.0292253	ILC2_c1
ANKRD44	3.18872e-08	0.255507	0.71	0.516	0.000367819	ILC2_c1
NLRC5	8.44274e-13	0.253877	0.414	0.234	9.7387e-09	ILC2_c1
RCSD1	4.62135e-12	0.25165	0.522	0.319	5.33073e-08	ILC2_c1
RNF20	4.52369e-09	0.250075	0.185	0.087	5.21808e-05	ILC2_c1
ST6GAL1	4.68247e-26	0.250039	0.323	0.114	5.40122e-22	ILC2_c1

## Sheet: ILC2_c2
gene	p_val	avg_log2FC	pct.1	pct.2	p_val_adj	cluster	Is_TF	KEGG_CYTOKINE_CYTOKINE_RECEPTOR_INTERACTION	CYTOKINE
DUSP1	5.10713e-59	2.85619	1	0.861	5.89107e-55	ILC2_c2
CD69	1.19554e-42	2.58458	0.985	0.794	1.37906e-38	ILC2_c2
EGR1	4.51279e-31	2.27372	0.745	0.254	5.2055e-27	ILC2_c2	Yes
FOS	3.69697e-30	1.74701	0.993	0.882	4.26446e-26	ILC2_c2	Yes
GPR183	6.59992e-31	1.54513	0.869	0.403	7.61301e-27	ILC2_c2
SELL	1.19734e-78	1.44976	0.92	0.236	1.38113e-74	ILC2_c2
B2M	2.52316e-56	1.43696	1	0.993	2.91047e-52	ILC2_c2
RGS1	8.0445e-16	1.32739	0.956	0.628	9.27933e-12	ILC2_c2
TSC22D3	6.51875e-25	1.26543	1	0.897	7.51938e-21	ILC2_c2
TOB1	1.88802e-27	1.18971	0.657	0.235	2.17784e-23	ILC2_c2
TXNIP	7.17736e-17	1.16638	0.949	0.784	8.27908e-13	ILC2_c2
HNRNPH1	3.1703e-39	1.11104	1	0.732	3.65694e-35	ILC2_c2
IL17RB	2.78696e-71	1.10638	0.533	0.082	3.21476e-67	ILC2_c2		IL17RB
TRAM1	6.44875e-22	1.02365	0.745	0.375	7.43863e-18	ILC2_c2
PPP1R15A	6.0436e-23	1.01877	0.971	0.705	6.97129e-19	ILC2_c2
TSPYL1	3.95489e-30	1.00321	0.861	0.413	4.56196e-26	ILC2_c2
DAZAP2	3.9949e-17	0.9956	0.949	0.65	4.60811e-13	ILC2_c2
TRAT1	1.84179e-40	0.991996	0.504	0.117	2.12451e-36	ILC2_c2
LPAR6	3.08798e-41	0.976646	0.606	0.163	3.56199e-37	ILC2_c2
CD200R1	1.19329e-64	0.935006	0.657	0.138	1.37646e-60	ILC2_c2
C1orf162	6.2074e-51	0.900204	0.715	0.197	7.16023e-47	ILC2_c2
STK17B	5.51002e-22	0.888164	1	0.746	6.3558e-18	ILC2_c2
NFKBIA	4.39599e-11	0.86215	1	0.894	5.07077e-07	ILC2_c2
ARHGAP15	3.01617e-26	0.829985	0.891	0.42	3.47915e-22	ILC2_c2
TESPA1	3.46804e-32	0.815456	0.825	0.312	4.00038e-28	ILC2_c2
ARHGDIB	3.15518e-17	0.809197	0.978	0.811	3.63951e-13	ILC2_c2
LDHB	9.36158e-19	0.806514	0.832	0.45	1.07986e-14	ILC2_c2
GIMAP7	3.4886e-40	0.801279	0.766	0.241	4.0241e-36	ILC2_c2
KLF6	2.87183e-09	0.778483	0.993	0.905	3.31265e-05	ILC2_c2	Yes
DDX5	7.85606e-21	0.77667	0.993	0.906	9.06196e-17	ILC2_c2
CDC42SE2	6.10176e-20	0.770784	0.905	0.533	7.03838e-16	ILC2_c2
CD52	4.1902e-16	0.755316	0.927	0.668	4.8334e-12	ILC2_c2
KLRG1	2.47548e-60	0.751865	0.628	0.128	2.85547e-56	ILC2_c2
S100A4	1.76052e-18	0.750535	0.956	0.67	2.03076e-14	ILC2_c2
FCRL3	3.50763e-68	0.741448	0.467	0.065	4.04605e-64	ILC2_c2
C6orf62	3.11685e-29	0.717613	0.949	0.455	3.59529e-25	ILC2_c2
GIMAP4	3.78567e-47	0.694521	0.577	0.131	4.36677e-43	ILC2_c2
ANXA1	1.4729e-21	0.694077	0.993	0.677	1.69899e-17	ILC2_c2
PDCD4	6.54388e-18	0.66798	0.949	0.559	7.54837e-14	ILC2_c2
CSGALCT1	6.61192e-97	0.650742	0.54	0.064	7.62686e-93	ILC2_c2
S1PR1	2.94863e-43	0.632786	0.518	0.116	3.40124e-39	ILC2_c2
SRSF3	9.7421e-10	0.631984	0.92	0.636	1.12375e-05	ILC2_c2
SLC40A1	2.43803e-30	0.619839	0.321	0.064	2.81227e-26	ILC2_c2
TNFSF10	4.54007e-24	0.601451	0.613	0.22	5.23697e-20	ILC2_c2		TNFSF10	TNFSF10
ARL6IP5	1.28587e-10	0.601167	0.81	0.492	1.48325e-06	ILC2_c2
SESN1	1.56181e-08	0.592642	0.628	0.355	0.000180154	ILC2_c2
PSMD10	4.76047e-25	0.585701	0.35	0.087	5.4912e-21	ILC2_c2
SAMSN1	2.15781e-11	0.584691	0.686	0.367	2.48903e-07	ILC2_c2
CNBP	1.67903e-13	0.580797	0.927	0.569	1.93676e-09	ILC2_c2
MFNG	2.74852e-28	0.580492	0.642	0.227	3.17041e-24	ILC2_c2
LAPTM5	3.89062e-10	0.576928	0.905	0.618	4.48783e-06	ILC2_c2
ABCA1	5.94756e-19	0.570467	0.46	0.162	6.86051e-15	ILC2_c2
CCR2	9.28192e-37	0.570112	0.226	0.029	1.07067e-32	ILC2_c2		CCR2
ORMDL1	1.05373e-22	0.569585	0.635	0.255	1.21547e-18	ILC2_c2
LIMD2	9.71967e-18	0.566105	0.803	0.451	1.12116e-13	ILC2_c2
CRBN	5.67643e-23	0.560604	0.62	0.236	6.54776e-19	ILC2_c2
MYL12A	9.68185e-14	0.560058	0.942	0.641	1.1168e-09	ILC2_c2
EMP3	4.15936e-37	0.559801	0.869	0.337	4.79782e-33	ILC2_c2
BIRC3	1.55578e-08	0.559467	0.854	0.584	0.000179459	ILC2_c2
TMED2	4.73842e-18	0.558393	0.818	0.408	5.46577e-14	ILC2_c2
TNFAIP8	5.85981e-14	0.55347	0.664	0.343	6.75929e-10	ILC2_c2
LCP1	3.75903e-08	0.550607	0.964	0.76	0.000433604	ILC2_c2
CD40LG	9.4876e-26	0.548573	0.423	0.116	1.0944e-21	ILC2_c2		CD40LG
TRAF3IP3	1.74756e-19	0.538205	0.737	0.327	2.01581e-15	ILC2_c2
PSMC2	6.44624e-20	0.530513	0.474	0.167	7.43574e-16	ILC2_c2
ANP32E	8.48613e-09	0.52411	0.679	0.4	9.78875e-05	ILC2_c2
MT-CYB	3.23564e-10	0.521957	1	0.977	3.73231e-06	ILC2_c2
PPT1	5.1402e-18	0.51693	0.504	0.197	5.92922e-14	ILC2_c2
EID1	1.40728e-11	0.510358	0.65	0.37	1.6233e-07	ILC2_c2
GLUL	1.35313e-09	0.498345	0.562	0.288	1.56084e-05	ILC2_c2
PSMA4	1.94052e-10	0.495757	0.489	0.249	2.2384e-06	ILC2_c2
MT-ND6	2.07437e-20	0.495107	0.993	0.614	2.39279e-16	ILC2_c2
PAN3	9.38432e-20	0.483873	0.701	0.304	1.08248e-15	ILC2_c2
CD164	2.53608e-07	0.48376	0.81	0.539	0.00292537	ILC2_c2
TRA2A	9.99614e-14	0.477092	0.92	0.61	1.15305e-09	ILC2_c2
RSL1D1	1.1769e-14	0.476331	0.715	0.377	1.35756e-10	ILC2_c2
RCBTB2	1.41431e-21	0.475138	0.438	0.138	1.6314e-17	ILC2_c2
ADAM19	2.4121e-41	0.473102	0.781	0.258	2.78236e-37	ILC2_c2
PIP4K2A	6.00013e-19	0.472534	0.905	0.467	6.92115e-15	ILC2_c2
IL16	1.41068e-12	0.470367	0.628	0.315	1.62722e-08	ILC2_c2
MAT2B	1.93365e-16	0.469668	0.664	0.307	2.23046e-12	ILC2_c2
UBASH3A	1.25386e-17	0.468361	0.328	0.099	1.44633e-13	ILC2_c2
OCIAD2	7.69996e-23	0.454777	0.584	0.226	8.8819e-19	ILC2_c2
ARF1	1.31732e-07	0.45443	0.81	0.554	0.00151953	ILC2_c2
LCK	7.92056e-18	0.45028	0.73	0.341	9.13637e-14	ILC2_c2
TNFRSF19	8.62422e-78	0.448106	0.263	0.018	9.94804e-74	ILC2_c2		TNFRSF19
PPP1CB	5.21029e-12	0.445862	0.927	0.572	6.01007e-08	ILC2_c2
SASH3	1.82562e-10	0.44352	0.569	0.289	2.10585e-06	ILC2_c2
CD84	1.29232e-30	0.443398	0.584	0.175	1.4907e-26	ILC2_c2
GHITM	1.26959e-10	0.434344	0.657	0.349	1.46447e-06	ILC2_c2
BIN2	1.74198e-10	0.43009	0.723	0.41	2.00937e-06	ILC2_c2
ELMO2	9.65342e-11	0.425122	0.438	0.193	1.11352e-06	ILC2_c2
C4orf3	4.60588e-17	0.422161	0.715	0.365	5.31289e-13	ILC2_c2
FSTL4	1.99075e-70	0.420984	0.467	0.063	2.29633e-66	ILC2_c2
NHSL2	1.50846e-16	0.416835	0.511	0.202	1.74e-12	ILC2_c2
RPN2	2.05958e-08	0.415036	0.701	0.409	0.000237572	ILC2_c2
SRSF5	7.21944e-07	0.414657	0.964	0.773	0.00832763	ILC2_c2
SELPLG	1.34956e-16	0.410015	0.65	0.288	1.55671e-12	ILC2_c2
STT3A	2.00965e-19	0.406415	0.54	0.199	2.31813e-15	ILC2_c2
ARPC5	4.60378e-11	0.399505	0.672	0.365	5.31046e-07	ILC2_c2
ESYT1	9.19734e-17	0.396653	0.701	0.309	1.06091e-12	ILC2_c2
PTGER2	5.20863e-13	0.395213	0.547	0.235	6.00815e-09	ILC2_c2
FCMR	5.20593e-16	0.392331	0.613	0.263	6.00504e-12	ILC2_c2
S1PR2	7.72135e-53	0.391866	0.38	0.057	8.90658e-49	ILC2_c2
TIMMDC1	4.62853e-11	0.389506	0.299	0.116	5.33901e-07	ILC2_c2
CORO1A	2.18382e-11	0.38334	0.905	0.576	2.51903e-07	ILC2_c2
DAD1	8.63045e-13	0.380915	0.672	0.363	9.95523e-09	ILC2_c2
GIMAP6	1.82032e-20	0.380344	0.635	0.253	2.09974e-16	ILC2_c2
FBXL5	1.53483e-13	0.379221	0.504	0.209	1.77042e-09	ILC2_c2
LTB	2.02244e-06	0.373761	0.92	0.663	0.0233288	ILC2_c2		LTB
VTA1	4.72696e-08	0.372616	0.307	0.139	0.000545255	ILC2_c2
ATP6V1G1	1.20476e-13	0.371746	0.752	0.408	1.38969e-09	ILC2_c2
MBOAT2	1.19769e-29	0.370441	0.416	0.101	1.38153e-25	ILC2_c2
GTF3A	2.64741e-13	0.36954	0.664	0.332	3.05379e-09	ILC2_c2	Yes
PPP1R7	1.03012e-06	0.367283	0.292	0.139	0.0118824	ILC2_c2
SRSF6	4.9058e-14	0.366706	0.891	0.488	5.65884e-10	ILC2_c2
UBA3	2.3214e-19	0.36399	0.496	0.178	2.67773e-15	ILC2_c2
PSMB9	2.25838e-13	0.361696	0.664	0.345	2.60504e-09	ILC2_c2
UBQLN1	4.80513e-11	0.3563	0.657	0.339	5.54272e-07	ILC2_c2
GLRX	3.47069e-24	0.350673	0.526	0.176	4.00344e-20	ILC2_c2
TRIB2	8.38754e-11	0.348284	0.569	0.285	9.67502e-07	ILC2_c2
E1	2.53225e-07	0.339438	0.277	0.124	0.00292095	ILC2_c2
TMEM258	2.24207e-17	0.335893	0.701	0.363	2.58623e-13	ILC2_c2
PPP1CA	3.07483e-12	0.333936	0.723	0.384	3.54682e-08	ILC2_c2
GMFG	3.40937e-13	0.331317	0.847	0.501	3.93271e-09	ILC2_c2
SOAT1	3.51127e-10	0.329315	0.489	0.231	4.05026e-06	ILC2_c2
SLAMF1	1.11268e-21	0.327823	0.679	0.251	1.28347e-17	ILC2_c2
MT-ND5	2.98778e-08	0.327646	0.993	0.916	0.00034464	ILC2_c2
DSTN	1.47328e-11	0.325677	0.453	0.207	1.69943e-07	ILC2_c2
GATA3	6.25344e-13	0.321603	0.927	0.564	7.21334e-09	ILC2_c2	Yes
CAPN2	4.81092e-11	0.31991	0.416	0.177	5.5494e-07	ILC2_c2
ZDHHC2	1.9943e-16	0.31876	0.438	0.167	2.30043e-12	ILC2_c2
LRPAP1	7.72213e-08	0.317203	0.474	0.258	0.000890747	ILC2_c2
C12orf4	2.53759e-06	0.315548	0.146	0.052	0.0292711	ILC2_c2
MT-ND4L	4.12481e-10	0.313271	1	0.923	4.75796e-06	ILC2_c2
CFL1	8.33419e-09	0.309841	0.978	0.803	9.61348e-05	ILC2_c2
MSRB3	1.22284e-12	0.307075	0.204	0.057	1.41055e-08	ILC2_c2
KLF12	1.66886e-08	0.306048	0.518	0.275	0.000192504	ILC2_c2	Yes
RS	1.72216e-06	0.305382	0.38	0.194	0.0198651	ILC2_c2
GRAP2	8.86453e-19	0.304498	0.255	0.062	1.02252e-14	ILC2_c2
ANXA5	7.34718e-09	0.299316	0.423	0.202	8.47497e-05	ILC2_c2
KIF3A	2.8909e-14	0.297812	0.343	0.119	3.33465e-10	ILC2_c2
GLIPR2	6.55853e-13	0.296403	0.533	0.242	7.56527e-09	ILC2_c2
PSMD4	2.32276e-14	0.296395	0.657	0.33	2.67931e-10	ILC2_c2
COPG1	1.72026e-27	0.295185	0.555	0.169	1.98432e-23	ILC2_c2
FKBP2	1.16624e-14	0.294703	0.445	0.197	1.34525e-10	ILC2_c2
NECAP2	2.08101e-08	0.294324	0.438	0.221	0.000240044	ILC2_c2
MRPL42	2.24217e-09	0.293943	0.299	0.124	2.58634e-05	ILC2_c2
SERINC5	8.57193e-44	0.292717	0.54	0.12	9.88772e-40	ILC2_c2
COX7A2	1.78976e-10	0.291882	0.693	0.432	2.06449e-06	ILC2_c2
TMEM173	8.84032e-10	0.29142	0.453	0.218	1.01973e-05	ILC2_c2
TRADD	1.38764e-11	0.290137	0.38	0.165	1.60065e-07	ILC2_c2
PSMB4	1.49936e-07	0.288778	0.635	0.372	0.00172952	ILC2_c2
ERGIC2	5.17227e-07	0.288212	0.365	0.186	0.00596622	ILC2_c2
PTP4A1	2.12933e-06	0.287531	0.445	0.244	0.0245618	ILC2_c2
IL2	1.13988e-54	0.286769	0.314	0.038	1.31485e-50	ILC2_c2		IL2	IL2
POLR2G	2.27472e-12	0.286756	0.496	0.224	2.62389e-08	ILC2_c2
FAM32A	2.27096e-07	0.286433	0.387	0.196	0.00261955	ILC2_c2
FERMT3	4.4674e-08	0.284152	0.46	0.235	0.000515315	ILC2_c2
APOBEC3C	1.29562e-14	0.283517	0.533	0.229	1.4945e-10	ILC2_c2
SEC11C	4.45255e-15	0.283483	0.474	0.192	5.13602e-11	ILC2_c2
NOSIP	2.13048e-24	0.28213	0.613	0.211	2.45751e-20	ILC2_c2
SRP68	3.59977e-08	0.280075	0.328	0.141	0.000415233	ILC2_c2
PLPP5	3.54102e-09	0.279396	0.277	0.112	4.08457e-05	ILC2_c2
WDR45	7.11317e-10	0.279354	0.387	0.171	8.20504e-06	ILC2_c2
MRFAP1L1	1.10017e-10	0.27829	0.453	0.201	1.26905e-06	ILC2_c2
PFDN5	1.91766e-07	0.276324	0.912	0.667	0.00221202	ILC2_c2
ISCA2	2.18469e-19	0.273724	0.292	0.078	2.52004e-15	ILC2_c2
TMEM209	3.89743e-27	0.273659	0.365	0.086	4.49569e-23	ILC2_c2
GMFB	1.10913e-07	0.272442	0.285	0.122	0.00127938	ILC2_c2
TMED10	1.56993e-07	0.271219	0.723	0.44	0.00181092	ILC2_c2
ATP6V0E1	2.74474e-06	0.268081	0.577	0.36	0.0316606	ILC2_c2
SLC35A4	5.08689e-09	0.267795	0.314	0.133	5.86773e-05	ILC2_c2
KARS	1.06868e-08	0.267648	0.46	0.227	0.000123272	ILC2_c2
SPCS3	1.28576e-08	0.267364	0.642	0.356	0.000148312	ILC2_c2
CNN2	8.78878e-10	0.26551	0.453	0.219	1.01379e-05	ILC2_c2
APC13	1.7637e-10	0.265484	0.27	0.099	2.03443e-06	ILC2_c2
COPE	2.31295e-13	0.263101	0.664	0.37	2.66798e-09	ILC2_c2
HPGD	2.45195e-11	0.262676	0.423	0.176	2.82832e-07	ILC2_c2
CNOT7	5.1654e-11	0.262511	0.518	0.248	5.95829e-07	ILC2_c2
HCLS1	2.00928e-08	0.261206	0.847	0.499	0.000231771	ILC2_c2
GIMAP2	1.20929e-07	0.260948	0.38	0.186	0.00139491	ILC2_c2
GMPR2	1.01811e-21	0.260822	0.38	0.105	1.17439e-17	ILC2_c2
RNF2	6.975e-13	0.260559	0.336	0.122	8.04567e-09	ILC2_c2
MRPS18B	1.45312e-11	0.260241	0.307	0.111	1.67617e-07	ILC2_c2
UFM1	1.98473e-08	0.259361	0.577	0.327	0.000228939	ILC2_c2
CALM2	4.27098e-09	0.259355	0.912	0.587	4.92658e-05	ILC2_c2
SSR1	1.75875e-09	0.255389	0.613	0.317	2.02872e-05	ILC2_c2
INPP5K	1.71149e-12	0.251156	0.409	0.163	1.9742e-08	ILC2_c2

## Sheet: c-Kit+ ILC2_c1
gene	p_val	avg_log2FC	pct.1	pct.2	p_val_adj	cluster	Is_TF	KEGG_CYTOKINE_CYTOKINE_RECEPTOR_INTERACTION	CYTOKINE
FTH1	7.43552e-267	4.01018	1	0.851	8.57688e-263	c-Kit+ ILC2_c1
RPL10	2.41359e-284	3.20603	1	0.955	2.78407e-280	c-Kit+ ILC2_c1
RPL28	2.2371e-283	3.12693	1	0.87	2.5805e-279	c-Kit+ ILC2_c1
RPL29	1.14558e-276	2.93095	0.998	0.764	1.32143e-272	c-Kit+ ILC2_c1
RPL39	3.06445e-274	2.90506	1	0.833	3.53485e-270	c-Kit+ ILC2_c1
RPL12	5.21704e-271	2.88772	0.996	0.815	6.01786e-267	c-Kit+ ILC2_c1
RPL18A	4.93428e-265	2.84657	0.992	0.842	5.69169e-261	c-Kit+ ILC2_c1
RPS8	2.38428e-270	2.84096	1	0.852	2.75027e-266	c-Kit+ ILC2_c1
RPL32	5.68355e-276	2.83445	0.998	0.893	6.55597e-272	c-Kit+ ILC2_c1
RPL41	1.55226e-273	2.81072	1	0.956	1.79054e-269	c-Kit+ ILC2_c1
RPS3A	9.7499e-267	2.80614	0.998	0.743	1.12465e-262	c-Kit+ ILC2_c1
RPLP1	4.17833e-271	2.75612	1	0.961	4.8197e-267	c-Kit+ ILC2_c1
RPS26	8.82701e-304	2.74643	0.988	0.41	1.0182e-299	c-Kit+ ILC2_c1
RPS28	7.04423e-267	2.71282	0.998	0.741	8.12552e-263	c-Kit+ ILC2_c1
VIM	2.1657e-209	2.64155	0.998	0.744	2.49813e-205	c-Kit+ ILC2_c1
CRIP1	1.22006e-269	2.62379	0.919	0.326	1.40734e-265	c-Kit+ ILC2_c1
RPS15	5.24193e-262	2.62051	0.996	0.845	6.04656e-258	c-Kit+ ILC2_c1
S100A6	4.31966e-252	2.61729	0.954	0.518	4.98272e-248	c-Kit+ ILC2_c1
RPS15A	6.50257e-258	2.59066	1	0.849	7.50071e-254	c-Kit+ ILC2_c1
RPS12	3.27895e-253	2.58719	0.998	0.884	3.78227e-249	c-Kit+ ILC2_c1
RPL34	2.94522e-262	2.57409	0.998	0.903	3.39731e-258	c-Kit+ ILC2_c1
RPL36	6.66285e-262	2.57281	0.998	0.811	7.6856e-258	c-Kit+ ILC2_c1
RPL9	3.50676e-269	2.56734	0.988	0.617	4.04505e-265	c-Kit+ ILC2_c1
RPL8	3.41507e-275	2.55622	1	0.871	3.93928e-271	c-Kit+ ILC2_c1
RPS27	1.31488e-249	2.55357	0.998	0.91	1.51672e-245	c-Kit+ ILC2_c1
SRGN	9.00043e-224	2.53411	0.996	0.892	1.0382e-219	c-Kit+ ILC2_c1
RPS7	8.51175e-255	2.53111	0.996	0.787	9.8183e-251	c-Kit+ ILC2_c1
RPL30	7.62225e-256	2.52965	0.998	0.892	8.79226e-252	c-Kit+ ILC2_c1
MT2A	2.77162e-166	2.51126	0.651	0.184	3.19706e-162	c-Kit+ ILC2_c1
RPS13	1.19278e-261	2.50553	0.996	0.835	1.37587e-257	c-Kit+ ILC2_c1
RPLP0	5.29745e-254	2.47354	0.996	0.851	6.11061e-250	c-Kit+ ILC2_c1
IL32	2.18188e-233	2.45727	0.987	0.578	2.5168e-229	c-Kit+ ILC2_c1
RPL19	2.36804e-262	2.44801	1	0.885	2.73154e-258	c-Kit+ ILC2_c1
RPS23	2.32549e-250	2.41492	0.996	0.839	2.68245e-246	c-Kit+ ILC2_c1
RPL11	1.92008e-260	2.39374	0.994	0.905	2.21481e-256	c-Kit+ ILC2_c1
RPL17	1.30713e-261	2.39001	0.983	0.546	1.50778e-257	c-Kit+ ILC2_c1
RPL21	5.91199e-249	2.36223	0.975	0.557	6.81947e-245	c-Kit+ ILC2_c1
RPL35A	1.13476e-248	2.33894	0.996	0.829	1.30894e-244	c-Kit+ ILC2_c1
RPL13	2.24526e-249	2.32952	1	0.937	2.58991e-245	c-Kit+ ILC2_c1
RPL18	9.38865e-259	2.32391	0.998	0.84	1.08298e-254	c-Kit+ ILC2_c1
RPL7A	1.02711e-246	2.32024	1	0.804	1.18477e-242	c-Kit+ ILC2_c1
FAU	2.61535e-253	2.29584	1	0.833	3.01681e-249	c-Kit+ ILC2_c1
RPL14	4.44947e-243	2.2911	0.996	0.839	5.13247e-239	c-Kit+ ILC2_c1
FTL	4.61492e-211	2.28441	0.988	0.813	5.32331e-207	c-Kit+ ILC2_c1
RPL22	1.37041e-252	2.27562	0.992	0.646	1.58077e-248	c-Kit+ ILC2_c1
RPL36A	1.36919e-288	2.25139	0.969	0.344	1.57936e-284	c-Kit+ ILC2_c1
RPS24	8.03063e-241	2.24425	1	0.877	9.26333e-237	c-Kit+ ILC2_c1
RPS27A	2.23637e-231	2.24357	0.996	0.899	2.57965e-227	c-Kit+ ILC2_c1
PTMA	2.3319e-218	2.18396	1	0.92	2.68985e-214	c-Kit+ ILC2_c1
RPL26	2.6894e-232	2.18216	0.992	0.81	3.10223e-228	c-Kit+ ILC2_c1
XCL1	4.13184e-23	2.13442	0.551	0.426	4.76608e-19	c-Kit+ ILC2_c1		XCL1	XCL1
RPS18	6.74568e-230	2.12832	1	0.862	7.78114e-226	c-Kit+ ILC2_c1
RPL37	8.16869e-225	2.11783	1	0.873	9.42258e-221	c-Kit+ ILC2_c1
RPL24	1.26336e-237	2.10674	0.996	0.767	1.45728e-233	c-Kit+ ILC2_c1
RPS21	8.89736e-222	2.10453	0.99	0.82	1.02631e-217	c-Kit+ ILC2_c1
S100A4	4.69074e-204	2.09092	0.967	0.651	5.41077e-200	c-Kit+ ILC2_c1
RPS2	1.25499e-215	2.06166	0.998	0.867	1.44764e-211	c-Kit+ ILC2_c1
RPS19	2.75847e-226	2.06043	1	0.884	3.18189e-222	c-Kit+ ILC2_c1
ANXA1	9.7059e-128	2.05195	0.96	0.661	1.11958e-123	c-Kit+ ILC2_c1
RPS25	3.74861e-221	2.04257	0.988	0.836	4.32402e-217	c-Kit+ ILC2_c1
RPS14	3.42797e-234	2.02452	1	0.883	3.95416e-230	c-Kit+ ILC2_c1
EEF1A1	4.53961e-208	2.01582	1	0.985	5.23644e-204	c-Kit+ ILC2_c1
PPDPF	1.83542e-250	2.01283	0.933	0.372	2.11716e-246	c-Kit+ ILC2_c1
RPS4X	8.22729e-232	1.95289	0.996	0.827	9.49017e-228	c-Kit+ ILC2_c1
HSPB1	5.97497e-81	1.92339	0.775	0.459	6.89213e-77	c-Kit+ ILC2_c1
GAPDH	1.11064e-186	1.91808	0.985	0.771	1.28112e-182	c-Kit+ ILC2_c1
CA	4.34814e-220	1.90873	0.981	0.722	5.01558e-216	c-Kit+ ILC2_c1
RPSA	1.15549e-196	1.87595	0.977	0.736	1.33286e-192	c-Kit+ ILC2_c1
EEF1G	3.76028e-285	1.86956	0.927	0.28	4.33748e-281	c-Kit+ ILC2_c1
MIF	4.24974e-232	1.86934	0.925	0.432	4.90208e-228	c-Kit+ ILC2_c1
TMSB10	5.18419e-150	1.86686	0.963	0.806	5.97996e-146	c-Kit+ ILC2_c1
RPS5	9.53177e-214	1.85952	0.987	0.764	1.09949e-209	c-Kit+ ILC2_c1
RPS3	7.61316e-219	1.85001	0.992	0.882	8.78178e-215	c-Kit+ ILC2_c1
EEF1B2	1.45505e-205	1.79334	0.969	0.656	1.67841e-201	c-Kit+ ILC2_c1
S100A10	6.73445e-191	1.79326	0.886	0.413	7.76818e-187	c-Kit+ ILC2_c1
LM	5.4503e-146	1.78273	0.855	0.407	6.28692e-142	c-Kit+ ILC2_c1
RPLP2	2.31594e-203	1.77625	0.998	0.885	2.67144e-199	c-Kit+ ILC2_c1
TAGLN2	2.00163e-163	1.75145	0.952	0.684	2.30887e-159	c-Kit+ ILC2_c1
RPL35	5.48465e-192	1.74486	0.979	0.782	6.32654e-188	c-Kit+ ILC2_c1
PLIN2	2.0026e-186	1.74403	0.821	0.261	2.31e-182	c-Kit+ ILC2_c1
EEF1D	1.27073e-189	1.72269	0.958	0.672	1.46579e-185	c-Kit+ ILC2_c1
IFITM1	5.4322e-160	1.70986	0.938	0.672	6.26604e-156	c-Kit+ ILC2_c1
KLRB1	1.81093e-153	1.62995	0.967	0.744	2.08891e-149	c-Kit+ ILC2_c1
RPL36AL	1.36637e-185	1.62237	0.942	0.634	1.5761e-181	c-Kit+ ILC2_c1
RPL10A	3.18241e-174	1.61579	0.971	0.779	3.67091e-170	c-Kit+ ILC2_c1
AQP3	3.48508e-56	1.56245	0.617	0.343	4.02004e-52	c-Kit+ ILC2_c1
RPL13A	4.52929e-178	1.52865	0.994	0.851	5.22453e-174	c-Kit+ ILC2_c1
RPL5	1.27613e-178	1.52176	0.994	0.843	1.47202e-174	c-Kit+ ILC2_c1
RPL23A	4.68513e-164	1.48598	0.987	0.826	5.4043e-160	c-Kit+ ILC2_c1
RPL37A	8.90812e-168	1.46817	0.994	0.851	1.02755e-163	c-Kit+ ILC2_c1
PPIB	1.1316e-175	1.4367	0.908	0.519	1.3053e-171	c-Kit+ ILC2_c1
SH3BGRL3	1.72559e-149	1.42708	0.963	0.718	1.99047e-145	c-Kit+ ILC2_c1
FAM177A1	1.23364e-139	1.42272	0.857	0.431	1.42301e-135	c-Kit+ ILC2_c1
RPL7	1.12161e-189	1.42142	0.954	0.387	1.29377e-185	c-Kit+ ILC2_c1
TMSB4X	3.67889e-139	1.40861	0.99	0.917	4.2436e-135	c-Kit+ ILC2_c1
FXYD5	1.02166e-154	1.40254	0.971	0.739	1.17848e-150	c-Kit+ ILC2_c1
MYL6	6.87476e-141	1.38406	0.96	0.793	7.93004e-137	c-Kit+ ILC2_c1
HLA-A	1.40807e-147	1.38124	0.994	0.974	1.62421e-143	c-Kit+ ILC2_c1
HSP90AA1	8.00353e-62	1.35796	0.985	0.896	9.23207e-58	c-Kit+ ILC2_c1
HLA-C	3.51307e-150	1.3573	0.996	0.975	4.05232e-146	c-Kit+ ILC2_c1
LGALS1	3.18594e-127	1.34976	0.586	0.182	3.67498e-123	c-Kit+ ILC2_c1
INSIG1	1.33698e-120	1.30319	0.671	0.224	1.54221e-116	c-Kit+ ILC2_c1
DDIT4	2.75817e-103	1.29965	0.911	0.639	3.18155e-99	c-Kit+ ILC2_c1
GYPC	3.79647e-162	1.28404	0.805	0.334	4.37923e-158	c-Kit+ ILC2_c1
HSPA8	4.07651e-66	1.27912	0.965	0.863	4.70225e-62	c-Kit+ ILC2_c1
HPGD	1.18301e-190	1.26801	0.647	0.141	1.3646e-186	c-Kit+ ILC2_c1
RPS4Y1	7.50454e-165	1.25766	0.863	0.345	8.65648e-161	c-Kit+ ILC2_c1
HSPE1	5.85046e-112	1.25286	0.854	0.519	6.7485e-108	c-Kit+ ILC2_c1
RPL15	9.46358e-142	1.24771	0.985	0.84	1.09162e-137	c-Kit+ ILC2_c1
RPS9	2.40451e-135	1.22392	0.956	0.76	2.7736e-131	c-Kit+ ILC2_c1
HINT1	1.31701e-137	1.21868	0.865	0.524	1.51917e-133	c-Kit+ ILC2_c1
UBA52	2.48105e-143	1.2133	0.971	0.802	2.86189e-139	c-Kit+ ILC2_c1
RPL38	2.39964e-137	1.21303	0.969	0.775	2.76799e-133	c-Kit+ ILC2_c1
BTF3	1.41179e-135	1.19584	0.906	0.614	1.6285e-131	c-Kit+ ILC2_c1
RPS16	1.81044e-140	1.18478	0.985	0.805	2.08834e-136	c-Kit+ ILC2_c1
RACK1	2.3947e-136	1.16913	0.983	0.797	2.76229e-132	c-Kit+ ILC2_c1
COX7C	8.99161e-135	1.16859	0.892	0.598	1.03718e-130	c-Kit+ ILC2_c1
SERP1	4.72533e-117	1.14933	0.884	0.544	5.45067e-113	c-Kit+ ILC2_c1
GPX4	1.1392e-121	1.1435	0.78	0.415	1.31406e-117	c-Kit+ ILC2_c1
CYBA	1.04836e-142	1.14244	0.85	0.428	1.20929e-138	c-Kit+ ILC2_c1
LEPROTL1	9.86746e-114	1.14166	0.788	0.384	1.13821e-109	c-Kit+ ILC2_c1
RSEK	1.28915e-141	1.13132	0.74	0.315	1.48703e-137	c-Kit+ ILC2_c1
LY6E	4.06365e-113	1.1276	0.761	0.368	4.68741e-109	c-Kit+ ILC2_c1
HIST1H1C	2.11799e-70	1.12426	0.47	0.193	2.4431e-66	c-Kit+ ILC2_c1
EZR	4.67385e-90	1.11188	0.934	0.689	5.39128e-86	c-Kit+ ILC2_c1
NME2	0	1.11132	0.659	0.06	0	c-Kit+ ILC2_c1	Yes
OAZ1	3.08006e-113	1.10855	0.931	0.718	3.55285e-109	c-Kit+ ILC2_c1
NINJ1	1.41476e-100	1.09527	0.699	0.317	1.63192e-96	c-Kit+ ILC2_c1
CREM	2.75676e-112	1.07906	0.852	0.407	3.17992e-108	c-Kit+ ILC2_c1	Yes
HLA-B	1.19426e-117	1.06928	0.998	0.981	1.37758e-113	c-Kit+ ILC2_c1
TMA7	1.29791e-211	1.0589	0.829	0.194	1.49714e-207	c-Kit+ ILC2_c1
FAM107B	2.06111e-85	1.05688	0.759	0.401	2.37749e-81	c-Kit+ ILC2_c1
PCBP2	4.10783e-106	1.05357	0.881	0.602	4.73839e-102	c-Kit+ ILC2_c1
PFDN5	1.27849e-115	1.05009	0.931	0.65	1.47474e-111	c-Kit+ ILC2_c1
H3F3A	1.21364e-140	1.0456	0.917	0.359	1.39993e-136	c-Kit+ ILC2_c1
UQCRB	3.37272e-117	1.04443	0.809	0.459	3.89043e-113	c-Kit+ ILC2_c1
ISG15	4.39226e-97	1.03849	0.597	0.242	5.06647e-93	c-Kit+ ILC2_c1
EMP3	6.16379e-107	1.0345	0.703	0.318	7.10993e-103	c-Kit+ ILC2_c1
GADD45G	9.08551e-201	1.03396	0.615	0.113	1.04801e-196	c-Kit+ ILC2_c1
PHLDA1	6.24366e-93	1.02872	0.813	0.423	7.20206e-89	c-Kit+ ILC2_c1
H2AFJ	5.62984e-122	1.0274	0.586	0.189	6.49402e-118	c-Kit+ ILC2_c1
H3F3B	1.6729e-107	1.02163	1	0.95	1.9297e-103	c-Kit+ ILC2_c1
ZFP36L2	6.29366e-99	1.01841	0.996	0.948	7.25974e-95	c-Kit+ ILC2_c1
HSP90AB1	3.91549e-71	1.01138	0.979	0.876	4.51652e-67	c-Kit+ ILC2_c1
CD52	2.49222e-76	1.00604	0.861	0.658	2.87478e-72	c-Kit+ ILC2_c1
SSR4	2.39534e-105	1.00392	0.805	0.496	2.76302e-101	c-Kit+ ILC2_c1
SNRPD2	7.63302e-95	0.995682	0.782	0.502	8.80469e-91	c-Kit+ ILC2_c1
PCBP1	1.82212e-105	0.994902	0.886	0.639	2.10181e-101	c-Kit+ ILC2_c1
HES4	5.19209e-161	0.988926	0.36	0.045	5.98908e-157	c-Kit+ ILC2_c1	Yes
COMMD6	4.12679e-110	0.983495	0.807	0.495	4.76025e-106	c-Kit+ ILC2_c1
NDUFV2	1.2086e-127	0.982247	0.699	0.262	1.39412e-123	c-Kit+ ILC2_c1
CYCS	6.9774e-70	0.978073	0.74	0.449	8.04844e-66	c-Kit+ ILC2_c1
S100A11	1.18622e-69	0.961217	0.682	0.426	1.36831e-65	c-Kit+ ILC2_c1
COX4I1	5.18579e-104	0.954764	0.917	0.648	5.98181e-100	c-Kit+ ILC2_c1
MYADM	3.65607e-68	0.950536	0.759	0.463	4.21727e-64	c-Kit+ ILC2_c1
SQSTM1	2.33032e-83	0.945477	0.857	0.562	2.68802e-79	c-Kit+ ILC2_c1
RGCC	1.61614e-93	0.94454	0.813	0.392	1.86422e-89	c-Kit+ ILC2_c1
FDX1	1.2849e-65	0.943793	0.434	0.169	1.48213e-61	c-Kit+ ILC2_c1
RPS29	9.12703e-114	0.942155	0.985	0.859	1.0528e-109	c-Kit+ ILC2_c1
SEC61B	1.04609e-97	0.933184	0.738	0.393	1.20667e-93	c-Kit+ ILC2_c1
EMD	6.02699e-111	0.931147	0.713	0.324	6.95214e-107	c-Kit+ ILC2_c1
GATA3	5.35867e-85	0.931046	0.859	0.547	6.18123e-81	c-Kit+ ILC2_c1	Yes
CHCHD2	5.41722e-97	0.929841	0.8	0.511	6.24876e-93	c-Kit+ ILC2_c1
YBX1	8.18996e-92	0.928948	0.844	0.557	9.44711e-88	c-Kit+ ILC2_c1	Yes
RPL22L1	1.3363e-100	0.925474	0.644	0.282	1.54142e-96	c-Kit+ ILC2_c1
SARAF	2.85732e-84	0.921546	0.975	0.818	3.29592e-80	c-Kit+ ILC2_c1
OST4	2.41021e-90	0.915082	0.782	0.539	2.78017e-86	c-Kit+ ILC2_c1
PNRC1	1.94449e-79	0.908493	0.915	0.718	2.24297e-75	c-Kit+ ILC2_c1
RPS17	3.2814e-79	0.897607	0.819	0.657	3.78509e-75	c-Kit+ ILC2_c1
CLIC1	1.1277e-81	0.876475	0.886	0.592	1.3008e-77	c-Kit+ ILC2_c1
NPM1	2.18257e-101	0.874083	0.898	0.65	2.5176e-97	c-Kit+ ILC2_c1
G15	1.03218e-155	0.87363	0.622	0.166	1.19062e-151	c-Kit+ ILC2_c1
CACYBP	5.88295e-44	0.869	0.588	0.346	6.78598e-40	c-Kit+ ILC2_c1
COX6A1	2.01319e-84	0.867167	0.707	0.424	2.32222e-80	c-Kit+ ILC2_c1
TOMM7	2.26647e-85	0.862161	0.798	0.537	2.61438e-81	c-Kit+ ILC2_c1
HSP90B1	1.5045e-63	0.861607	0.902	0.662	1.73544e-59	c-Kit+ ILC2_c1
POLR2L	5.92468e-74	0.851263	0.674	0.413	6.83412e-70	c-Kit+ ILC2_c1
RPS6	3.40909e-101	0.849433	0.99	0.888	3.93239e-97	c-Kit+ ILC2_c1
TXN	1.62491e-66	0.827421	0.553	0.279	1.87433e-62	c-Kit+ ILC2_c1
IL2RG	4.4813e-81	0.821411	0.921	0.768	5.16918e-77	c-Kit+ ILC2_c1		IL2RG
H2AFV	4.02711e-74	0.814066	0.684	0.367	4.64527e-70	c-Kit+ ILC2_c1
PLP2	1.46434e-91	0.812258	0.699	0.329	1.68911e-87	c-Kit+ ILC2_c1
PPIA	6.58495e-90	0.8097	0.906	0.706	7.59575e-86	c-Kit+ ILC2_c1
SPOCK2	8.84663e-59	0.803089	0.819	0.616	1.02046e-54	c-Kit+ ILC2_c1
CKLF	1.56735e-54	0.800575	0.584	0.35	1.80794e-50	c-Kit+ ILC2_c1
GABARAP	1.24044e-116	0.795652	0.609	0.215	1.43085e-112	c-Kit+ ILC2_c1
BTG1	1.5013e-63	0.792564	0.996	0.957	1.73175e-59	c-Kit+ ILC2_c1
RHBDD2	8.27995e-93	0.790508	0.584	0.216	9.55093e-89	c-Kit+ ILC2_c1
SLAMF1	6.66005e-141	0.789354	0.724	0.22	7.68237e-137	c-Kit+ ILC2_c1
RPL27	4.55589e-89	0.788923	0.925	0.768	5.25522e-85	c-Kit+ ILC2_c1
EIF1	6.2415e-83	0.785615	0.998	0.946	7.19957e-79	c-Kit+ ILC2_c1
MAP1LC3B	2.1977e-66	0.782598	0.769	0.449	2.53505e-62	c-Kit+ ILC2_c1
CCDC107	1.02877e-69	0.779526	0.534	0.25	1.18668e-65	c-Kit+ ILC2_c1
ELOB	4.98958e-71	0.77822	0.686	0.441	5.75548e-67	c-Kit+ ILC2_c1
UBC	6.55543e-106	0.776532	0.985	0.865	7.56168e-102	c-Kit+ ILC2_c1
HNRNPA0	5.86938e-79	0.776411	0.771	0.443	6.77033e-75	c-Kit+ ILC2_c1
RPL3	1.33204e-75	0.775954	0.979	0.853	1.53651e-71	c-Kit+ ILC2_c1
C9orf16	3.15735e-96	0.77472	0.578	0.23	3.642e-92	c-Kit+ ILC2_c1
SAT1	6.38471e-50	0.771011	0.802	0.51	7.36476e-46	c-Kit+ ILC2_c1
LTB	4.13873e-52	0.762468	0.873	0.651	4.77402e-48	c-Kit+ ILC2_c1		LTB
CHCHD10	1.18198e-145	0.757272	0.489	0.105	1.36341e-141	c-Kit+ ILC2_c1
UQCRH	7.58258e-68	0.755666	0.624	0.345	8.74651e-64	c-Kit+ ILC2_c1
EIF5A	4.22248e-44	0.755452	0.647	0.52	4.87063e-40	c-Kit+ ILC2_c1
TUBB4B	7.22891e-68	0.746041	0.657	0.329	8.33855e-64	c-Kit+ ILC2_c1
TIMP1	1.46185e-58	0.745334	0.62	0.339	1.68624e-54	c-Kit+ ILC2_c1
ARL4A	2.75577e-76	0.738991	0.657	0.314	3.17877e-72	c-Kit+ ILC2_c1
CD7	1.89784e-78	0.735334	0.861	0.592	2.18916e-74	c-Kit+ ILC2_c1
B2M	1.89625e-102	0.731397	1	0.993	2.18733e-98	c-Kit+ ILC2_c1
KRTCAP2	4.94114e-67	0.726842	0.543	0.272	5.69961e-63	c-Kit+ ILC2_c1
CCR6	6.64948e-50	0.724133	0.422	0.19	7.67017e-46	c-Kit+ ILC2_c1		CCR6
NDUFA13	4.56279e-64	0.722772	0.609	0.368	5.26318e-60	c-Kit+ ILC2_c1
H2AFZ	2.15554e-36	0.721563	0.595	0.367	2.48641e-32	c-Kit+ ILC2_c1
TPI1	4.22917e-53	0.7201	0.778	0.557	4.87835e-49	c-Kit+ ILC2_c1
ARPC3	2.5532e-68	0.719728	0.744	0.517	2.94512e-64	c-Kit+ ILC2_c1
HIST1H4C	1.19519e-42	0.719172	0.628	0.457	1.37865e-38	c-Kit+ ILC2_c1
ROMO1	3.76e-56	0.712019	0.538	0.296	4.33716e-52	c-Kit+ ILC2_c1
RHOG	1.88215e-81	0.710544	0.609	0.256	2.17106e-77	c-Kit+ ILC2_c1
NDUFS5	4.70939e-56	0.703097	0.593	0.35	5.43229e-52	c-Kit+ ILC2_c1
CSTB	1.11436e-72	0.693794	0.539	0.239	1.28541e-68	c-Kit+ ILC2_c1
GUK1	5.32329e-60	0.684575	0.678	0.408	6.14041e-56	c-Kit+ ILC2_c1
HNRNPA1	1.26556e-70	0.683371	0.913	0.807	1.45982e-66	c-Kit+ ILC2_c1
UQCR11	8.8747e-59	0.683358	0.663	0.46	1.0237e-54	c-Kit+ ILC2_c1
TPT1	9.18014e-108	0.683081	0.998	0.93	1.05893e-103	c-Kit+ ILC2_c1
NCR3	2.18079e-90	0.683074	0.53	0.181	2.51554e-86	c-Kit+ ILC2_c1
SUMO2	1.78908e-65	0.680532	0.703	0.453	2.0637e-61	c-Kit+ ILC2_c1
SEC61G	1.78478e-56	0.676563	0.557	0.311	2.05875e-52	c-Kit+ ILC2_c1
SYAP1	6.51624e-55	0.67611	0.644	0.362	7.51648e-51	c-Kit+ ILC2_c1
EDF1	4.30369e-52	0.675555	0.688	0.488	4.96431e-48	c-Kit+ ILC2_c1
SOCS1	8.9072e-46	0.675113	0.509	0.251	1.02744e-41	c-Kit+ ILC2_c1
CUTA	4.31861e-44	0.670412	0.626	0.414	4.98152e-40	c-Kit+ ILC2_c1
RAN	3.53118e-56	0.661919	0.699	0.427	4.07322e-52	c-Kit+ ILC2_c1
NDUFB2	3.08312e-52	0.65702	0.607	0.39	3.55638e-48	c-Kit+ ILC2_c1
PGK1	4.56979e-49	0.656967	0.842	0.556	5.27125e-45	c-Kit+ ILC2_c1
RABAC1	1.34501e-58	0.654645	0.524	0.267	1.55147e-54	c-Kit+ ILC2_c1
ALAS1	4.17927e-56	0.654388	0.478	0.192	4.82079e-52	c-Kit+ ILC2_c1
RELB	1.24729e-77	0.652882	0.58	0.254	1.43875e-73	c-Kit+ ILC2_c1	Yes
ALDOA	5.49244e-203	0.648053	0.461	0.057	6.33553e-199	c-Kit+ ILC2_c1
PRDX2	2.04656e-39	0.644337	0.472	0.261	2.36071e-35	c-Kit+ ILC2_c1
EFNB1	2.70238e-117	0.641011	0.299	0.043	3.1172e-113	c-Kit+ ILC2_c1
PTGER2	1.23091e-85	0.637842	0.597	0.212	1.41985e-81	c-Kit+ ILC2_c1
LAPTM4A	1.45414e-68	0.635854	0.561	0.238	1.67736e-64	c-Kit+ ILC2_c1
CARD16	2.08106e-53	0.635	0.453	0.203	2.4005e-49	c-Kit+ ILC2_c1
CD48	3.9867e-57	0.633294	0.69	0.388	4.59866e-53	c-Kit+ ILC2_c1
C12orf57	2.99577e-90	0.632545	0.678	0.299	3.45562e-86	c-Kit+ ILC2_c1
TGFB1	1.8647e-56	0.630205	0.657	0.381	2.15093e-52	c-Kit+ ILC2_c1		TGFB1	TGFB1
HCST	1.11904e-43	0.629754	0.599	0.379	1.29081e-39	c-Kit+ ILC2_c1
COX6C	1.45462e-43	0.628023	0.62	0.449	1.67791e-39	c-Kit+ ILC2_c1
SLC25A3	5.51352e-40	0.627517	0.819	0.56	6.35985e-36	c-Kit+ ILC2_c1
TNFRSF18	1.43644e-36	0.627291	0.644	0.452	1.65694e-32	c-Kit+ ILC2_c1		TNFRSF18
CLEC2B	4.64307e-39	0.627072	0.584	0.37	5.35578e-35	c-Kit+ ILC2_c1
GPSM3	1.03503e-33	0.625614	0.607	0.467	1.1939e-29	c-Kit+ ILC2_c1
SMDT1	7.8587e-59	0.622944	0.547	0.281	9.06501e-55	c-Kit+ ILC2_c1
RAC1	1.13496e-56	0.621033	0.632	0.355	1.30918e-52	c-Kit+ ILC2_c1
IFITM2	9.81888e-72	0.620893	0.894	0.705	1.13261e-67	c-Kit+ ILC2_c1
ARPC1B	4.55926e-39	0.618445	0.63	0.468	5.2591e-35	c-Kit+ ILC2_c1
GNG2	8.04806e-44	0.617971	0.584	0.329	9.28343e-40	c-Kit+ ILC2_c1
ARF6	5.86825e-46	0.615988	0.738	0.519	6.76902e-42	c-Kit+ ILC2_c1
FKBP4	1.19585e-37	0.615762	0.389	0.165	1.37941e-33	c-Kit+ ILC2_c1
UXT	1.14315e-58	0.61539	0.565	0.3	1.31862e-54	c-Kit+ ILC2_c1
ALOX5AP	1.94472e-44	0.615112	0.63	0.351	2.24324e-40	c-Kit+ ILC2_c1
EIF3K	4.75734e-53	0.614682	0.678	0.42	5.48759e-49	c-Kit+ ILC2_c1
DEGS1	9.65373e-46	0.612485	0.549	0.287	1.11356e-41	c-Kit+ ILC2_c1
PDCL3	5.72358e-80	0.608887	0.399	0.118	6.60215e-76	c-Kit+ ILC2_c1
PTGES3	8.69455e-42	0.6087	0.699	0.498	1.00292e-37	c-Kit+ ILC2_c1
NDUFB11	5.00736e-68	0.60815	0.576	0.284	5.77599e-64	c-Kit+ ILC2_c1
SNU13	1.1339e-48	0.607274	0.566	0.318	1.30795e-44	c-Kit+ ILC2_c1
CD37	4.76444e-58	0.606741	0.802	0.559	5.49578e-54	c-Kit+ ILC2_c1
HSPA5	5.54741e-59	0.602132	0.961	0.739	6.39894e-55	c-Kit+ ILC2_c1
PRDX1	1.00079e-56	0.594905	0.509	0.234	1.15441e-52	c-Kit+ ILC2_c1
ARHGDIB	1.40434e-30	0.59361	0.94	0.804	1.61991e-26	c-Kit+ ILC2_c1
ARHGDIA	9.92507e-31	0.593576	0.578	0.444	1.14486e-26	c-Kit+ ILC2_c1
DUSP6	3.93639e-49	0.583551	0.661	0.346	4.54063e-45	c-Kit+ ILC2_c1
TUBA1B	1.96151e-33	0.579646	0.603	0.447	2.2626e-29	c-Kit+ ILC2_c1
SOD1	4.53591e-22	0.578556	0.599	0.449	5.23217e-18	c-Kit+ ILC2_c1
SRP14	1.84735e-43	0.573058	0.769	0.605	2.13092e-39	c-Kit+ ILC2_c1
UBL5	1.51199e-35	0.572516	0.615	0.468	1.74408e-31	c-Kit+ ILC2_c1
SLC16A3	4.98527e-48	0.566072	0.566	0.308	5.75051e-44	c-Kit+ ILC2_c1
HSPA1A	2.72865e-73	0.564933	0.875	0.508	3.1475e-69	c-Kit+ ILC2_c1
SLC25A5	1.68384e-48	0.564064	0.667	0.383	1.94231e-44	c-Kit+ ILC2_c1
ARL6IP4	1.2413e-78	0.563119	0.487	0.179	1.43184e-74	c-Kit+ ILC2_c1
VSIR	3.92092e-38	0.558665	0.551	0.309	4.52278e-34	c-Kit+ ILC2_c1
DHRS7	4.01174e-42	0.554581	0.647	0.379	4.62754e-38	c-Kit+ ILC2_c1
LAPTM5	1.22124e-43	0.55239	0.836	0.606	1.4087e-39	c-Kit+ ILC2_c1
UBB	4.28782e-52	0.550824	0.848	0.783	4.946e-48	c-Kit+ ILC2_c1
COX7B	7.42314e-33	0.550517	0.532	0.357	8.56259e-29	c-Kit+ ILC2_c1
SKP1	4.69033e-40	0.550336	0.827	0.67	5.41029e-36	c-Kit+ ILC2_c1
RHOF	1.57126e-56	0.546853	0.511	0.232	1.81244e-52	c-Kit+ ILC2_c1
TNFRSF4	8.08063e-17	0.5464	0.42	0.302	9.32101e-13	c-Kit+ ILC2_c1		TNFRSF4
CAPG	6.56737e-56	0.545936	0.644	0.32	7.57546e-52	c-Kit+ ILC2_c1
SH2D2A	2.59883e-61	0.539901	0.503	0.212	2.99775e-57	c-Kit+ ILC2_c1
NBL1	1.18585e-77	0.539895	0.372	0.101	1.36788e-73	c-Kit+ ILC2_c1
CCDC85B	3.82027e-62	0.53855	0.487	0.2	4.40668e-58	c-Kit+ ILC2_c1
RBM8A	1.05419e-49	0.531867	0.672	0.458	1.21601e-45	c-Kit+ ILC2_c1
SCAND1	1.04981e-49	0.528557	0.484	0.242	1.21096e-45	c-Kit+ ILC2_c1
GNG5	5.68654e-35	0.528481	0.478	0.294	6.55942e-31	c-Kit+ ILC2_c1
COX7A2	1.44722e-38	0.528168	0.607	0.424	1.66937e-34	c-Kit+ ILC2_c1
HIGD2A	1.76435e-58	0.527045	0.507	0.237	2.03518e-54	c-Kit+ ILC2_c1
RARA	1.5065e-57	0.526036	0.487	0.212	1.73775e-53	c-Kit+ ILC2_c1	Yes
MYL12B	7.50305e-43	0.523896	0.769	0.535	8.65477e-39	c-Kit+ ILC2_c1
NDUFA1	2.51169e-41	0.523612	0.582	0.394	2.89724e-37	c-Kit+ ILC2_c1
CDKN1A	5.78989e-56	0.523473	0.605	0.281	6.67864e-52	c-Kit+ ILC2_c1
DOK2	5.49178e-30	0.522794	0.441	0.235	6.33476e-26	c-Kit+ ILC2_c1
CALM1	6.285e-31	0.522617	0.931	0.814	7.24975e-27	c-Kit+ ILC2_c1
ST13	1.18898e-32	0.522526	0.541	0.37	1.37149e-28	c-Kit+ ILC2_c1
CDC42	2.1372e-51	0.522252	0.776	0.591	2.46526e-47	c-Kit+ ILC2_c1
PFN1	1.70652e-61	0.518248	0.95	0.822	1.96847e-57	c-Kit+ ILC2_c1
JUNB	7.09038e-14	0.516682	0.863	0.822	8.17875e-10	c-Kit+ ILC2_c1	Yes
LMO4	2.13493e-48	0.516011	0.561	0.278	2.46264e-44	c-Kit+ ILC2_c1
SSR2	5.11088e-52	0.510974	0.75	0.437	5.8954e-48	c-Kit+ ILC2_c1
TNFRSF9	9.5916e-98	0.510062	0.461	0.112	1.10639e-93	c-Kit+ ILC2_c1		TNFRSF9
DDT	2.04641e-74	0.505286	0.437	0.144	2.36053e-70	c-Kit+ ILC2_c1
MORF4L1	1.68893e-39	0.494598	0.672	0.492	1.94818e-35	c-Kit+ ILC2_c1
TUBA1A	7.05777e-24	0.493508	0.541	0.364	8.14114e-20	c-Kit+ ILC2_c1
TRGC1	5.4772e-09	0.492266	0.378	0.313	6.31795e-05	c-Kit+ ILC2_c1
C19orf53	1.40992e-43	0.489891	0.497	0.275	1.62635e-39	c-Kit+ ILC2_c1
TMEM258	3.39238e-27	0.487095	0.507	0.359	3.91311e-23	c-Kit+ ILC2_c1
NSA2	1.75343e-55	0.485332	0.495	0.221	2.02258e-51	c-Kit+ ILC2_c1
REL	7.39396e-65	0.484049	0.821	0.505	8.52894e-61	c-Kit+ ILC2_c1	Yes
SNHG16	1.62448e-48	0.483678	0.443	0.2	1.87384e-44	c-Kit+ ILC2_c1
YWHAZ	1.55959e-37	0.483411	0.921	0.816	1.79899e-33	c-Kit+ ILC2_c1
GLIPR1	2.01146e-25	0.483292	0.522	0.338	2.32022e-21	c-Kit+ ILC2_c1
RPL31	1.70111e-79	0.481451	0.963	0.808	1.96223e-75	c-Kit+ ILC2_c1
HSPD1	9.8874e-80	0.479605	0.882	0.598	1.14051e-75	c-Kit+ ILC2_c1
FKBP8	1.27223e-34	0.479541	0.441	0.244	1.46752e-30	c-Kit+ ILC2_c1
CHMP4B	2.45356e-93	0.479028	0.41	0.099	2.83019e-89	c-Kit+ ILC2_c1
HMGB1	7.29695e-40	0.477751	0.805	0.723	8.41703e-36	c-Kit+ ILC2_c1
UBE2B	7.35553e-34	0.473492	0.578	0.381	8.4846e-30	c-Kit+ ILC2_c1
SC5D	3.08338e-84	0.464933	0.486	0.142	3.55668e-80	c-Kit+ ILC2_c1
PRELID1	1.6794e-40	0.46446	0.462	0.253	1.93719e-36	c-Kit+ ILC2_c1
HNRNPDL	3.28051e-30	0.460432	0.846	0.68	3.78406e-26	c-Kit+ ILC2_c1
DYNLT3	2.16351e-35	0.45846	0.441	0.224	2.49561e-31	c-Kit+ ILC2_c1
TOMM20	2.55979e-48	0.45621	0.532	0.271	2.95272e-44	c-Kit+ ILC2_c1
GLRX	1.60538e-28	0.456137	0.345	0.169	1.85181e-24	c-Kit+ ILC2_c1
COX5B	1.46523e-28	0.452601	0.522	0.365	1.69014e-24	c-Kit+ ILC2_c1
RAP1B	1.51781e-28	0.451854	0.688	0.59	1.75079e-24	c-Kit+ ILC2_c1
CALR	1.19282e-22	0.450209	0.671	0.549	1.37592e-18	c-Kit+ ILC2_c1
APRT	1.11923e-19	0.449175	0.503	0.394	1.29103e-15	c-Kit+ ILC2_c1
TRAF4	3.04227e-43	0.448533	0.405	0.181	3.50926e-39	c-Kit+ ILC2_c1
UQCRQ	5.26944e-21	0.44758	0.493	0.375	6.0783e-17	c-Kit+ ILC2_c1
SNHG6	3.12123e-31	0.447453	0.557	0.392	3.60034e-27	c-Kit+ ILC2_c1
EEF2	2.78054e-31	0.447283	0.919	0.773	3.20736e-27	c-Kit+ ILC2_c1
CYSTM1	3.77361e-114	0.445525	0.32	0.053	4.35286e-110	c-Kit+ ILC2_c1
NDUFA3	1.1402e-24	0.441115	0.462	0.321	1.31522e-20	c-Kit+ ILC2_c1
TOMM22	3.51629e-49	0.437945	0.482	0.228	4.05604e-45	c-Kit+ ILC2_c1
GADD45B	1.00798e-32	0.434406	0.711	0.507	1.1627e-28	c-Kit+ ILC2_c1
LDHA	1.44517e-33	0.434191	0.771	0.515	1.667e-29	c-Kit+ ILC2_c1
COX8A	4.61675e-32	0.433871	0.557	0.39	5.32543e-28	c-Kit+ ILC2_c1
MYC	1.85444e-44	0.432958	0.401	0.16	2.13909e-40	c-Kit+ ILC2_c1	Yes
ZC3H12A	2.11086e-41	0.432263	0.586	0.317	2.43487e-37	c-Kit+ ILC2_c1
NDUFC2	1.14854e-22	0.430953	0.382	0.245	1.32484e-18	c-Kit+ ILC2_c1
ISCA1	1.67731e-60	0.430428	0.443	0.167	1.93478e-56	c-Kit+ ILC2_c1
PRR7	2.03513e-57	0.428551	0.287	0.081	2.34752e-53	c-Kit+ ILC2_c1
TUBA1C	2.70307e-41	0.424504	0.349	0.146	3.11799e-37	c-Kit+ ILC2_c1
YWHAH	3.78842e-24	0.418698	0.408	0.229	4.36994e-20	c-Kit+ ILC2_c1
ACTG1	4.00333e-21	0.418365	0.96	0.816	4.61784e-17	c-Kit+ ILC2_c1
SUB1	1.49097e-20	0.416931	0.565	0.461	1.71984e-16	c-Kit+ ILC2_c1
BZW1	9.1591e-38	0.416896	0.73	0.539	1.0565e-33	c-Kit+ ILC2_c1
DRAP1	9.36161e-19	0.41552	0.451	0.341	1.07986e-14	c-Kit+ ILC2_c1	Yes
SOCS3	2.05474e-36	0.412178	0.428	0.203	2.37014e-32	c-Kit+ ILC2_c1
PRNP	1.29702e-22	0.411756	0.696	0.458	1.49612e-18	c-Kit+ ILC2_c1
CCNI	3.0306e-40	0.409234	0.894	0.678	3.49579e-36	c-Kit+ ILC2_c1
TOMM5	1.32741e-26	0.409168	0.339	0.185	1.53116e-22	c-Kit+ ILC2_c1
ELOVL5	1.83342e-31	0.40837	0.736	0.492	2.11485e-27	c-Kit+ ILC2_c1
NDUFA11	9.09916e-118	0.404784	0.403	0.075	1.04959e-113	c-Kit+ ILC2_c1
POMP	2.27143e-26	0.40436	0.434	0.264	2.62009e-22	c-Kit+ ILC2_c1
WDR83OS	4.7674e-21	0.404136	0.482	0.358	5.49919e-17	c-Kit+ ILC2_c1
RPS20	6.63421e-73	0.402254	0.931	0.778	7.65256e-69	c-Kit+ ILC2_c1
RNF7	2.64514e-39	0.400167	0.426	0.199	3.05117e-35	c-Kit+ ILC2_c1
ZFP36	5.47372e-26	0.399454	0.992	0.872	6.31393e-22	c-Kit+ ILC2_c1
NDUFB8	1.96388e-21	0.398142	0.455	0.334	2.26534e-17	c-Kit+ ILC2_c1
VPS37B	1.84374e-23	0.396992	0.426	0.259	2.12676e-19	c-Kit+ ILC2_c1
HMGN2	1.81062e-13	0.393999	0.532	0.497	2.08855e-09	c-Kit+ ILC2_c1
NDUFA6	1.13825e-29	0.393572	0.414	0.234	1.31297e-25	c-Kit+ ILC2_c1
SAP18	5.36681e-22	0.391742	0.58	0.434	6.19062e-18	c-Kit+ ILC2_c1
SNRPB2	4.24415e-24	0.391363	0.405	0.245	4.89563e-20	c-Kit+ ILC2_c1
EIF3F	5.71651e-27	0.390237	0.563	0.399	6.59399e-23	c-Kit+ ILC2_c1
RWDD1	1.09304e-30	0.390112	0.443	0.254	1.26082e-26	c-Kit+ ILC2_c1
PSME1	3.17564e-26	0.389495	0.778	0.627	3.6631e-22	c-Kit+ ILC2_c1
ODC1	1.18809e-53	0.388407	0.482	0.187	1.37046e-49	c-Kit+ ILC2_c1
ICAM3	1.51915e-25	0.387849	0.468	0.31	1.75234e-21	c-Kit+ ILC2_c1
PSME2	9.92183e-22	0.385433	0.593	0.452	1.14448e-17	c-Kit+ ILC2_c1
CEBPD	5.3328e-16	0.383957	0.233	0.115	6.15139e-12	c-Kit+ ILC2_c1	Yes
TPM3	2.09967e-25	0.383625	0.79	0.641	2.42197e-21	c-Kit+ ILC2_c1
EIF4A3	1.69827e-08	0.383088	0.501	0.361	0.000195895	c-Kit+ ILC2_c1
SLC2A3	1.57164e-41	0.381626	0.825	0.549	1.81289e-37	c-Kit+ ILC2_c1
PSMA2	2.03437e-25	0.381607	0.372	0.221	2.34665e-21	c-Kit+ ILC2_c1
TRAPPC5	1.91381e-50	0.379591	0.295	0.097	2.20758e-46	c-Kit+ ILC2_c1
PIM3	6.56437e-14	0.378645	0.443	0.313	7.572e-10	c-Kit+ ILC2_c1
NFKBIZ	2.91326e-17	0.377658	0.809	0.641	3.36044e-13	c-Kit+ ILC2_c1
COX6B1	3.30038e-17	0.373837	0.497	0.399	3.80699e-13	c-Kit+ ILC2_c1
DBI	2.69508e-22	0.37366	0.457	0.306	3.10878e-18	c-Kit+ ILC2_c1
ANP32B	6.37329e-31	0.371461	0.539	0.34	7.35159e-27	c-Kit+ ILC2_c1
FGL2	5.27737e-48	0.370961	0.227	0.056	6.08744e-44	c-Kit+ ILC2_c1
RALA	1.35058e-31	0.370018	0.378	0.188	1.55789e-27	c-Kit+ ILC2_c1
TKT	2.47634e-39	0.368789	0.422	0.186	2.85646e-35	c-Kit+ ILC2_c1
TSEN54	1.25846e-29	0.367572	0.526	0.311	1.45164e-25	c-Kit+ ILC2_c1
DYNLL1	7.05431e-18	0.367407	0.482	0.355	8.13714e-14	c-Kit+ ILC2_c1
NTRK1	3.31295e-64	0.363633	0.276	0.064	3.82148e-60	c-Kit+ ILC2_c1
SMIM3	8.54707e-25	0.361745	0.322	0.15	9.85905e-21	c-Kit+ ILC2_c1
OSTF1	4.26048e-20	0.361324	0.507	0.341	4.91446e-16	c-Kit+ ILC2_c1
IFNGR1	9.66485e-39	0.360545	0.692	0.4	1.11484e-34	c-Kit+ ILC2_c1		IFNGR1
HOTAIRM1	2.11737e-17	0.359348	0.262	0.139	2.44239e-13	c-Kit+ ILC2_c1
MZT2B	4.74307e-37	0.35728	0.393	0.181	5.47113e-33	c-Kit+ ILC2_c1
UCP2	2.79356e-08	0.356992	0.593	0.479	0.000322238	c-Kit+ ILC2_c1
BSG	1.30884e-20	0.356359	0.534	0.405	1.50974e-16	c-Kit+ ILC2_c1
HNRNPAB	2.17919e-31	0.356196	0.434	0.227	2.5137e-27	c-Kit+ ILC2_c1
TRMT112	2.33722e-13	0.35557	0.503	0.431	2.69598e-09	c-Kit+ ILC2_c1
FIS1	3.52788e-26	0.354927	0.408	0.244	4.06941e-22	c-Kit+ ILC2_c1
KLF5	1.0381e-70	0.354616	0.306	0.071	1.19745e-66	c-Kit+ ILC2_c1	Yes
SSR3	8.73923e-25	0.354027	0.514	0.329	1.00807e-20	c-Kit+ ILC2_c1
NOP10	1.54558e-23	0.353106	0.401	0.245	1.78283e-19	c-Kit+ ILC2_c1
GADD45A	1.71203e-46	0.352273	0.345	0.124	1.97483e-42	c-Kit+ ILC2_c1
RHEB	5.22742e-28	0.351868	0.387	0.214	6.02983e-24	c-Kit+ ILC2_c1
CDKN1B	2.2692e-36	0.350522	0.507	0.264	2.61753e-32	c-Kit+ ILC2_c1
IL17RB	1.38747e-51	0.348784	0.277	0.076	1.60045e-47	c-Kit+ ILC2_c1		IL17RB
TSTD1	2.08279e-21	0.347363	0.432	0.294	2.40249e-17	c-Kit+ ILC2_c1
APC11	3.07215e-17	0.345156	0.345	0.225	3.54373e-13	c-Kit+ ILC2_c1
MARCKSL1	1.40207e-45	0.344878	0.254	0.074	1.61728e-41	c-Kit+ ILC2_c1
MPT	1.72215e-34	0.34119	0.511	0.29	1.9865e-30	c-Kit+ ILC2_c1
GMFG	6.04332e-23	0.341081	0.626	0.498	6.97097e-19	c-Kit+ ILC2_c1
NUTF2	4.28522e-11	0.340713	0.378	0.29	4.943e-07	c-Kit+ ILC2_c1
ARF5	1.24125e-24	0.340085	0.405	0.242	1.43179e-20	c-Kit+ ILC2_c1
AKIRIN2	3.02754e-38	0.338265	0.459	0.219	3.49227e-34	c-Kit+ ILC2_c1
VDAC1	7.28014e-26	0.338252	0.468	0.278	8.39764e-22	c-Kit+ ILC2_c1
C4orf48	1.06208e-49	0.338141	0.276	0.085	1.22511e-45	c-Kit+ ILC2_c1
GNB2	3.63867e-32	0.337409	0.407	0.212	4.19721e-28	c-Kit+ ILC2_c1
EIF3E	1.3731e-24	0.33672	0.611	0.419	1.58388e-20	c-Kit+ ILC2_c1
DDX24	2.0077e-39	0.33488	0.834	0.592	2.31588e-35	c-Kit+ ILC2_c1
PARK7	2.77493e-17	0.334154	0.501	0.352	3.20088e-13	c-Kit+ ILC2_c1
ATP1B1	3.55955e-28	0.333778	0.329	0.151	4.10594e-24	c-Kit+ ILC2_c1
MAGOH	6.96497e-43	0.332856	0.297	0.105	8.03409e-39	c-Kit+ ILC2_c1
TPM4	1.29605e-16	0.332148	0.518	0.384	1.49499e-12	c-Kit+ ILC2_c1
KRT10	1.51885e-19	0.332073	0.345	0.211	1.752e-15	c-Kit+ ILC2_c1
PAK2	6.4341e-32	0.330599	0.63	0.419	7.42173e-28	c-Kit+ ILC2_c1
P4HB	2.44378e-26	0.330117	0.651	0.442	2.8189e-22	c-Kit+ ILC2_c1
ATP1B3	8.70739e-35	0.329992	0.518	0.268	1.0044e-30	c-Kit+ ILC2_c1
IFI6	5.19343e-12	0.328001	0.291	0.195	5.99062e-08	c-Kit+ ILC2_c1
IL10RA	1.56292e-48	0.327474	0.659	0.315	1.80283e-44	c-Kit+ ILC2_c1		IL10RA
RHOA	1.39598e-20	0.326414	0.836	0.621	1.61026e-16	c-Kit+ ILC2_c1
NDUFA4	5.32132e-13	0.325457	0.511	0.45	6.13814e-09	c-Kit+ ILC2_c1
RAC2	2.80385e-20	0.325345	0.742	0.612	3.23424e-16	c-Kit+ ILC2_c1
HMGA1	4.64468e-25	0.32429	0.322	0.164	5.35764e-21	c-Kit+ ILC2_c1	Yes
UQCRFS1	7.53398e-31	0.32396	0.389	0.204	8.69045e-27	c-Kit+ ILC2_c1
PABPC1	2.83587e-33	0.323098	0.988	0.94	3.27117e-29	c-Kit+ ILC2_c1
LSM7	6.71902e-17	0.321706	0.343	0.221	7.75039e-13	c-Kit+ ILC2_c1
PTPN1	9.76095e-25	0.314688	0.482	0.287	1.12593e-20	c-Kit+ ILC2_c1
SLC3A2	1.30132e-21	0.313343	0.534	0.333	1.50107e-17	c-Kit+ ILC2_c1
BATF	3.46657e-28	0.312837	0.329	0.151	3.99869e-24	c-Kit+ ILC2_c1	Yes
ENSA	1.40162e-15	0.311907	0.476	0.358	1.61677e-11	c-Kit+ ILC2_c1
PLEKHF1	1.58181e-31	0.311209	0.322	0.139	1.82462e-27	c-Kit+ ILC2_c1
SPATS2L	5.02829e-27	0.310263	0.26	0.105	5.80013e-23	c-Kit+ ILC2_c1
ALKBH7	4.66309e-29	0.309397	0.306	0.142	5.37888e-25	c-Kit+ ILC2_c1
METTL21A	2.12648e-14	0.308638	0.249	0.138	2.45289e-10	c-Kit+ ILC2_c1
EIF2S2	8.53378e-13	0.308489	0.351	0.25	9.84372e-09	c-Kit+ ILC2_c1
CD63	1.66228e-19	0.308178	0.647	0.488	1.91744e-15	c-Kit+ ILC2_c1
KLF3	1.12552e-30	0.307739	0.37	0.173	1.29828e-26	c-Kit+ ILC2_c1	Yes
MYL12A	4.82514e-16	0.306151	0.775	0.636	5.56579e-12	c-Kit+ ILC2_c1
TUBA4A	3.44206e-23	0.305938	0.468	0.272	3.97042e-19	c-Kit+ ILC2_c1
LAYN	2.87728e-14	0.30556	0.183	0.087	3.31895e-10	c-Kit+ ILC2_c1
ATP6V1G1	1.867e-21	0.304031	0.559	0.403	2.15358e-17	c-Kit+ ILC2_c1
TNFRSF1B	2.59158e-39	0.303433	0.493	0.231	2.98939e-35	c-Kit+ ILC2_c1		TNFRSF1B
ITM2A	8.37907e-23	0.303297	0.476	0.275	9.66526e-19	c-Kit+ ILC2_c1
RPS27L	1.06538e-16	0.302619	0.368	0.241	1.22891e-12	c-Kit+ ILC2_c1
UQCR10	8.78156e-10	0.302204	0.364	0.289	1.01295e-05	c-Kit+ ILC2_c1
TMEM50A	5.52751e-25	0.30193	0.563	0.354	6.37598e-21	c-Kit+ ILC2_c1
SF3B5	1.39091e-19	0.301056	0.453	0.304	1.60442e-15	c-Kit+ ILC2_c1
SNRPG	4.06128e-08	0.300862	0.335	0.283	0.000468469	c-Kit+ ILC2_c1
TUBB2A	3.08336e-61	0.300014	0.249	0.056	3.55665e-57	c-Kit+ ILC2_c1
TSPO	8.7855e-11	0.299873	0.399	0.32	1.01341e-06	c-Kit+ ILC2_c1
COX5A	4.71418e-19	0.299261	0.441	0.298	5.43781e-15	c-Kit+ ILC2_c1
PSMA7	5.16975e-16	0.297887	0.586	0.456	5.96331e-12	c-Kit+ ILC2_c1
ISG20	2.54798e-10	0.297488	0.422	0.313	2.93909e-06	c-Kit+ ILC2_c1
HIST1H1E	1.28458e-07	0.296448	0.276	0.204	0.00148176	c-Kit+ ILC2_c1
MAP2K3	2.2514e-26	0.296335	0.41	0.218	2.59699e-22	c-Kit+ ILC2_c1
GLO1	1.64138e-15	0.294934	0.32	0.185	1.89333e-11	c-Kit+ ILC2_c1
CD55	1.07745e-30	0.294371	0.653	0.412	1.24284e-26	c-Kit+ ILC2_c1
A1BG	1.13807e-101	0.293487	0.208	0.023	1.31277e-97	c-Kit+ ILC2_c1
SEC62	1.35052e-10	0.293357	0.499	0.431	1.55783e-06	c-Kit+ ILC2_c1
DCXR	1.58735e-14	0.292971	0.353	0.232	1.83101e-10	c-Kit+ ILC2_c1
GABARAPL1	4.33218e-44	0.292337	0.696	0.368	4.99717e-40	c-Kit+ ILC2_c1
NDFIP2	4.28952e-56	0.291291	0.245	0.057	4.94796e-52	c-Kit+ ILC2_c1
PHLDA2	3.25718e-55	0.290645	0.168	0.029	3.75716e-51	c-Kit+ ILC2_c1
SLC10A3	3.78426e-46	0.29057	0.281	0.086	4.36515e-42	c-Kit+ ILC2_c1
BAX	2.12315e-26	0.289821	0.249	0.103	2.44906e-22	c-Kit+ ILC2_c1
CSRNP1	9.59398e-21	0.288775	0.713	0.503	1.10667e-16	c-Kit+ ILC2_c1	Yes
FXYD1	5.61796e-55	0.288522	0.185	0.037	6.48031e-51	c-Kit+ ILC2_c1
MGAT2	4.77505e-50	0.287826	0.283	0.083	5.50802e-46	c-Kit+ ILC2_c1
AMPD2	4.97016e-14	0.287816	0.322	0.199	5.73308e-10	c-Kit+ ILC2_c1
ARID5A	2.66327e-23	0.286186	0.476	0.295	3.07208e-19	c-Kit+ ILC2_c1	Yes
HMGB3	4.04822e-35	0.286099	0.123	0.025	4.66962e-31	c-Kit+ ILC2_c1
RSL24D1	1.10453e-17	0.28593	0.418	0.278	1.27407e-13	c-Kit+ ILC2_c1
DDX27	1.0608e-10	0.285913	0.42	0.325	1.22363e-06	c-Kit+ ILC2_c1
UFC1	1.4523e-22	0.285856	0.468	0.283	1.67523e-18	c-Kit+ ILC2_c1
YWHAB	6.50948e-19	0.284865	0.813	0.624	7.50869e-15	c-Kit+ ILC2_c1
VDAC2	2.64661e-15	0.28366	0.399	0.281	3.05287e-11	c-Kit+ ILC2_c1
MANF	1.02966e-26	0.28363	0.276	0.116	1.18771e-22	c-Kit+ ILC2_c1
PPARG	3.30578e-82	0.283517	0.316	0.065	3.81322e-78	c-Kit+ ILC2_c1	Yes
ATOX1	4.20005e-20	0.283442	0.266	0.136	4.84476e-16	c-Kit+ ILC2_c1
BCL3	7.08046e-14	0.283017	0.276	0.17	8.16731e-10	c-Kit+ ILC2_c1
MRPS6	1.18772e-07	0.282049	0.324	0.244	0.00137004	c-Kit+ ILC2_c1
CXCR6	4.67008e-37	0.281941	0.353	0.138	5.38694e-33	c-Kit+ ILC2_c1		CXCR6
COX20	1.37688e-18	0.281218	0.291	0.158	1.58823e-14	c-Kit+ ILC2_c1
SOD2	2.38741e-18	0.280696	0.328	0.186	2.75388e-14	c-Kit+ ILC2_c1
LYPD3	9.45307e-36	0.280273	0.118	0.022	1.09041e-31	c-Kit+ ILC2_c1
LSR	1.49186e-26	0.279726	0.266	0.117	1.72086e-22	c-Kit+ ILC2_c1
BST2	2.73341e-11	0.278275	0.536	0.434	3.15299e-07	c-Kit+ ILC2_c1
FERMT2	2.77123e-48	0.276169	0.214	0.051	3.19662e-44	c-Kit+ ILC2_c1
UBE2D2	7.9396e-18	0.273283	0.593	0.453	9.15833e-14	c-Kit+ ILC2_c1
PRDX6	3.70933e-27	0.271019	0.441	0.234	4.27872e-23	c-Kit+ ILC2_c1
EFHD2	4.94644e-22	0.269811	0.443	0.277	5.70571e-18	c-Kit+ ILC2_c1
UBE2V1	7.38808e-13	0.269658	0.291	0.193	8.52215e-09	c-Kit+ ILC2_c1
NEU1	2.30965e-17	0.268051	0.408	0.236	2.66418e-13	c-Kit+ ILC2_c1
SYPL1	3.54273e-39	0.267768	0.474	0.212	4.08654e-35	c-Kit+ ILC2_c1
NUDC	9.50153e-11	0.267643	0.391	0.287	1.096e-06	c-Kit+ ILC2_c1
ANXA2	1.19081e-37	0.267506	0.341	0.132	1.3736e-33	c-Kit+ ILC2_c1
TBCA	1.32466e-08	0.266129	0.306	0.237	0.000152799	c-Kit+ ILC2_c1
SEC11C	1.11447e-17	0.265457	0.324	0.187	1.28554e-13	c-Kit+ ILC2_c1
SNHG8	3.53759e-07	0.264843	0.468	0.428	0.00408061	c-Kit+ ILC2_c1
TEX30	1.41092e-09	0.264072	0.254	0.164	1.6275e-05	c-Kit+ ILC2_c1
HMOX2	1.77105e-13	0.263796	0.366	0.231	2.04291e-09	c-Kit+ ILC2_c1
IGFLR1	1.05735e-23	0.263293	0.25	0.113	1.21965e-19	c-Kit+ ILC2_c1
PRR13	2.32147e-08	0.263031	0.437	0.402	0.000267782	c-Kit+ ILC2_c1
EIF1AX	1.32639e-24	0.262735	0.53	0.353	1.52999e-20	c-Kit+ ILC2_c1
TYMP	1.50615e-35	0.262411	0.324	0.13	1.73735e-31	c-Kit+ ILC2_c1
ENY2	2.00899e-13	0.261974	0.36	0.244	2.31737e-09	c-Kit+ ILC2_c1
STRAP	6.6009e-25	0.261479	0.52	0.307	7.61414e-21	c-Kit+ ILC2_c1
SNX6	4.06322e-20	0.261211	0.422	0.256	4.68692e-16	c-Kit+ ILC2_c1
TMEM167A	1.20829e-17	0.260614	0.376	0.23	1.39376e-13	c-Kit+ ILC2_c1
IFI27L2	2.17154e-22	0.259859	0.235	0.104	2.50488e-18	c-Kit+ ILC2_c1
CNIH1	2.2785e-31	0.259593	0.333	0.143	2.62825e-27	c-Kit+ ILC2_c1
CALM3	4.87269e-11	0.257203	0.41	0.319	5.62065e-07	c-Kit+ ILC2_c1
MID1IP1	6.34807e-14	0.257133	0.224	0.118	7.3225e-10	c-Kit+ ILC2_c1
SYNGR2	1.13284e-14	0.256751	0.424	0.297	1.30674e-10	c-Kit+ ILC2_c1
CMTM8	7.23898e-65	0.25523	0.187	0.03	8.35016e-61	c-Kit+ ILC2_c1
APH1A	4.27897e-35	0.253762	0.314	0.121	4.9358e-31	c-Kit+ ILC2_c1
SNRPB	5.13014e-11	0.253597	0.514	0.456	5.91761e-07	c-Kit+ ILC2_c1
CSNK2B	8.84985e-13	0.253546	0.42	0.328	1.02083e-08	c-Kit+ ILC2_c1
MZT2A	4.98683e-27	0.252946	0.289	0.129	5.7523e-23	c-Kit+ ILC2_c1
BCAS2	6.07176e-16	0.250531	0.42	0.275	7.00378e-12	c-Kit+ ILC2_c1
CLU	7.05497e-30	0.25033	0.154	0.041	8.1379e-26	c-Kit+ ILC2_c1

## Sheet: c-Kit+ ILC2_c2
gene	p_val	avg_log2FC	pct.1	pct.2	p_val_adj	cluster	Is_TF	KEGG_CYTOKINE_CYTOKINE_RECEPTOR_INTERACTION	CYTOKINE
NEAT1	1.9091e-169	2.85275	0.949	0.759	2.20214e-165	c-Kit+ ILC2_c2
MALAT1	6.15099e-223	2.78155	1	0.999	7.09516e-219	c-Kit+ ILC2_c2
SMCHD1	6.31248e-186	2.77579	0.921	0.565	7.28144e-182	c-Kit+ ILC2_c2
ANKRD12	6.05342e-141	2.73784	0.863	0.63	6.98262e-137	c-Kit+ ILC2_c2
USP15	1.47426e-182	2.67393	0.887	0.51	1.70055e-178	c-Kit+ ILC2_c2
MTRNR2L8	1.94972e-174	2.51964	0.978	0.669	2.249e-170	c-Kit+ ILC2_c2
PGAP1	3.47824e-176	2.24565	0.506	0.089	4.01214e-172	c-Kit+ ILC2_c2
TLE4	4.80015e-119	2.19293	0.667	0.284	5.53697e-115	c-Kit+ ILC2_c2
TSPYL2	7.18009e-114	2.16262	0.848	0.57	8.28223e-110	c-Kit+ ILC2_c2
AHK	2.06624e-85	2.15634	0.788	0.566	2.38341e-81	c-Kit+ ILC2_c2
EML4	2.70339e-144	2.12856	0.921	0.722	3.11837e-140	c-Kit+ ILC2_c2
PHLDA1	1.67292e-112	2.12044	0.77	0.43	1.92972e-108	c-Kit+ ILC2_c2
GATA3	5.20165e-105	2.10555	0.812	0.554	6.0001e-101	c-Kit+ ILC2_c2	Yes
RORA	4.19489e-95	2.06187	0.797	0.58	4.8388e-91	c-Kit+ ILC2_c2	Yes
IL10RA	1.04203e-125	2.03987	0.724	0.314	1.20198e-121	c-Kit+ ILC2_c2		IL10RA
NR3C1	6.71402e-131	2.03856	0.845	0.53	7.74462e-127	c-Kit+ ILC2_c2	Yes
SLAMF1	4.62279e-134	1.96971	0.664	0.23	5.33239e-130	c-Kit+ ILC2_c2
ITK	1.76302e-87	1.89046	0.647	0.332	2.03364e-83	c-Kit+ ILC2_c2
ZFP36L2	4.88234e-135	1.87771	0.991	0.949	5.63178e-131	c-Kit+ ILC2_c2
BACH2	2.32475e-70	1.8041	0.51	0.227	2.6816e-66	c-Kit+ ILC2_c2	Yes
EPC1	6.99374e-67	1.7532	0.691	0.518	8.06728e-63	c-Kit+ ILC2_c2
REL	2.96758e-78	1.74742	0.748	0.514	3.4231e-74	c-Kit+ ILC2_c2	Yes
STAT4	4.36674e-58	1.71854	0.66	0.489	5.03704e-54	c-Kit+ ILC2_c2	Yes
HERC1	1.48471e-41	1.67996	0.574	0.419	1.71261e-37	c-Kit+ ILC2_c2
ZBTB16	2.7702e-73	1.66786	0.678	0.408	3.19542e-69	c-Kit+ ILC2_c2	Yes
DUSP6	6.0978e-67	1.62777	0.636	0.351	7.03381e-63	c-Kit+ ILC2_c2
IFRD1	3.6429e-77	1.62511	0.737	0.506	4.20209e-73	c-Kit+ ILC2_c2
ANKRD28	8.09105e-44	1.62296	0.581	0.411	9.33303e-40	c-Kit+ ILC2_c2
MPT	1.17658e-47	1.59623	0.506	0.293	1.35718e-43	c-Kit+ ILC2_c2
MAST4	1.30667e-48	1.59487	0.49	0.27	1.50725e-44	c-Kit+ ILC2_c2
NFKB1	1.65494e-65	1.59485	0.744	0.612	1.90897e-61	c-Kit+ ILC2_c2	Yes
CDC14A	4.19365e-36	1.5649	0.51	0.359	4.83737e-32	c-Kit+ ILC2_c2
STK4	7.40809e-59	1.56456	0.706	0.561	8.54524e-55	c-Kit+ ILC2_c2
AHR	1.37363e-57	1.56424	0.651	0.469	1.58448e-53	c-Kit+ ILC2_c2	Yes
AKAP13	1.39669e-65	1.55236	0.795	0.709	1.61108e-61	c-Kit+ ILC2_c2
FAM102A	1.20258e-44	1.53903	0.481	0.273	1.38717e-40	c-Kit+ ILC2_c2
ITGAV	1.32225e-96	1.53707	0.439	0.12	1.52522e-92	c-Kit+ ILC2_c2
GRK5	1.28866e-141	1.53654	0.477	0.099	1.48647e-137	c-Kit+ ILC2_c2
CHD2	4.95423e-33	1.533	0.62	0.566	5.71471e-29	c-Kit+ ILC2_c2
FUS	1.63269e-81	1.52679	0.812	0.685	1.88331e-77	c-Kit+ ILC2_c2
STAM	5.14639e-77	1.50691	0.574	0.273	5.93636e-73	c-Kit+ ILC2_c2
ALAS1	4.56265e-52	1.49941	0.442	0.197	5.26301e-48	c-Kit+ ILC2_c2
MTRNR2L12	1.57168e-45	1.49905	0.786	0.849	1.81294e-41	c-Kit+ ILC2_c2
AQP3	1.86786e-12	1.47971	0.424	0.36	2.15458e-08	c-Kit+ ILC2_c2
HNRNPA2B1	9.88419e-65	1.47717	0.863	0.875	1.14014e-60	c-Kit+ ILC2_c2
NDUFV2	1.13238e-48	1.47582	0.503	0.281	1.3062e-44	c-Kit+ ILC2_c2
SQSTM1	4.45211e-42	1.46377	0.671	0.578	5.13551e-38	c-Kit+ ILC2_c2
KLF5	1.06148e-89	1.46315	0.333	0.072	1.22442e-85	c-Kit+ ILC2_c2	Yes
DDX21	3.78167e-40	1.46298	0.55	0.377	4.36216e-36	c-Kit+ ILC2_c2
LRRFIP2	1.17415e-54	1.44933	0.488	0.243	1.35438e-50	c-Kit+ ILC2_c2
USP47	6.79557e-52	1.44673	0.587	0.369	7.8387e-48	c-Kit+ ILC2_c2
ZC3HAV1	1.63725e-48	1.44319	0.711	0.597	1.88857e-44	c-Kit+ ILC2_c2
PDE4D	5.56562e-23	1.43742	0.541	0.499	6.41994e-19	c-Kit+ ILC2_c2
STARD4	7.30483e-49	1.43577	0.389	0.162	8.42612e-45	c-Kit+ ILC2_c2
NFKBIZ	4.44098e-60	1.42954	0.823	0.642	5.12267e-56	c-Kit+ ILC2_c2
NFAT5	2.78522e-40	1.4239	0.503	0.31	3.21275e-36	c-Kit+ ILC2_c2	Yes
RALGAPA1	2.62843e-46	1.41606	0.536	0.328	3.03189e-42	c-Kit+ ILC2_c2
PPARG	5.5221e-115	1.3963	0.358	0.065	6.36974e-111	c-Kit+ ILC2_c2	Yes
INPP1	5.32899e-41	1.38628	0.389	0.182	6.14699e-37	c-Kit+ ILC2_c2
KIAA1109	2.10445e-38	1.37143	0.55	0.382	2.42748e-34	c-Kit+ ILC2_c2
HPGD	3.69311e-70	1.36139	0.455	0.161	4.26e-66	c-Kit+ ILC2_c2
PBX4	1.63316e-86	1.35696	0.362	0.087	1.88385e-82	c-Kit+ ILC2_c2	Yes
GABARAPL1	2.55235e-44	1.35611	0.576	0.38	2.94413e-40	c-Kit+ ILC2_c2
MT-CO2	4.09029e-96	1.34758	0.998	0.992	4.71814e-92	c-Kit+ ILC2_c2
ZNF331	5.17822e-54	1.31426	0.711	0.491	5.97308e-50	c-Kit+ ILC2_c2	Yes
SLC2A3	7.28473e-43	1.31224	0.717	0.56	8.40294e-39	c-Kit+ ILC2_c2
MT-CO1	1.89816e-93	1.29453	0.998	0.997	2.18953e-89	c-Kit+ ILC2_c2
PIK3R1	7.03266e-36	1.28366	0.596	0.435	8.11218e-32	c-Kit+ ILC2_c2
EZR	2.54702e-57	1.26219	0.817	0.7	2.93798e-53	c-Kit+ ILC2_c2
LM	1.79355e-53	1.26115	0.684	0.424	2.06886e-49	c-Kit+ ILC2_c2
FAM133B	1.21807e-29	1.2587	0.444	0.282	1.40504e-25	c-Kit+ ILC2_c2
B4GALT1	5.87138e-22	1.25505	0.508	0.432	6.77264e-18	c-Kit+ ILC2_c2
CPD	9.51892e-49	1.25412	0.448	0.208	1.09801e-44	c-Kit+ ILC2_c2
GADD45G	8.62678e-62	1.25159	0.395	0.134	9.95099e-58	c-Kit+ ILC2_c2
SYTL3	8.87938e-28	1.24753	0.585	0.482	1.02424e-23	c-Kit+ ILC2_c2
PAK2	6.24228e-22	1.24336	0.506	0.43	7.20047e-18	c-Kit+ ILC2_c2
PABPC4	2.03828e-21	1.23957	0.477	0.375	2.35115e-17	c-Kit+ ILC2_c2
HSPA5	1.14905e-40	1.23717	0.806	0.752	1.32543e-36	c-Kit+ ILC2_c2
ATP1B1	4.17235e-48	1.2196	0.373	0.15	4.8128e-44	c-Kit+ ILC2_c2
FAM107B	6.36061e-27	1.19781	0.545	0.421	7.33696e-23	c-Kit+ ILC2_c2
TNFAIP3	2.54774e-80	1.19723	0.996	0.885	2.93882e-76	c-Kit+ ILC2_c2
IFNGR1	1.34481e-37	1.19552	0.581	0.411	1.55123e-33	c-Kit+ ILC2_c2		IFNGR1
ELL2	1.14543e-31	1.19496	0.534	0.387	1.32126e-27	c-Kit+ ILC2_c2
FNBP1	3.84843e-32	1.19013	0.691	0.711	4.43916e-28	c-Kit+ ILC2_c2
LRMP	1.20681e-30	1.18755	0.428	0.255	1.39206e-26	c-Kit+ ILC2_c2
ABHD5	4.18807e-36	1.18053	0.298	0.117	4.83094e-32	c-Kit+ ILC2_c2
SPAG9	2.34386e-37	1.15161	0.442	0.242	2.70364e-33	c-Kit+ ILC2_c2
RANBP2	1.63706e-16	1.14438	0.519	0.458	1.88835e-12	c-Kit+ ILC2_c2
MBNL2	3.81918e-26	1.14214	0.38	0.22	4.40542e-22	c-Kit+ ILC2_c2	Yes
MYH9	4.11842e-31	1.13342	0.675	0.656	4.75059e-27	c-Kit+ ILC2_c2
DDX24	1.36573e-34	1.12965	0.678	0.606	1.57537e-30	c-Kit+ ILC2_c2
MBNL1	3.39744e-26	1.1281	0.689	0.738	3.91894e-22	c-Kit+ ILC2_c2
SF1	8.26767e-24	1.10248	0.605	0.6	9.53675e-20	c-Kit+ ILC2_c2
RAPGEF2	2.85099e-23	1.09759	0.305	0.16	3.28862e-19	c-Kit+ ILC2_c2
RNF149	5.41076e-18	1.09683	0.501	0.45	6.24131e-14	c-Kit+ ILC2_c2
NDEL1	1.92501e-21	1.09678	0.466	0.365	2.22049e-17	c-Kit+ ILC2_c2
RBM39	2.94372e-43	1.09625	0.806	0.854	3.39558e-39	c-Kit+ ILC2_c2
CYTH1	2.90818e-10	1.09025	0.466	0.486	3.35459e-06	c-Kit+ ILC2_c2
SLC7A5	7.05499e-54	1.08041	0.49	0.221	8.13793e-50	c-Kit+ ILC2_c2
BATF	5.04444e-16	1.07684	0.272	0.157	5.81876e-12	c-Kit+ ILC2_c2	Yes
ZFC3H1	1.47089e-17	1.07367	0.395	0.291	1.69667e-13	c-Kit+ ILC2_c2
DDX39B	5.17281e-37	1.06911	0.36	0.163	5.96683e-33	c-Kit+ ILC2_c2
ELOVL5	1.44907e-18	1.06426	0.558	0.508	1.6715e-14	c-Kit+ ILC2_c2
RGCC	1.89038e-30	1.06004	0.581	0.414	2.18056e-26	c-Kit+ ILC2_c2
RRBP1	7.80963e-19	1.05983	0.382	0.263	9.0084e-15	c-Kit+ ILC2_c2
PDLIM5	2.37948e-22	1.05901	0.276	0.139	2.74473e-18	c-Kit+ ILC2_c2
DDIT4	4.31775e-27	1.05269	0.689	0.658	4.98053e-23	c-Kit+ ILC2_c2
VIM	1.36104e-84	1.05174	0.945	0.751	1.56996e-80	c-Kit+ ILC2_c2
NTRK1	1.02419e-74	1.04837	0.294	0.065	1.1814e-70	c-Kit+ ILC2_c2
BRAF	7.29538e-21	1.0439	0.391	0.263	8.41522e-17	c-Kit+ ILC2_c2
KDM5B	9.65095e-18	1.04332	0.402	0.291	1.11324e-13	c-Kit+ ILC2_c2	Yes
CNOT6L	4.68588e-19	1.04247	0.488	0.405	5.40517e-15	c-Kit+ ILC2_c2
BTG1	2.057e-65	1.03834	0.971	0.959	2.37275e-61	c-Kit+ ILC2_c2
SLC39A10	3.60947e-19	1.03748	0.347	0.223	4.16352e-15	c-Kit+ ILC2_c2
ARGLU1	5.9988e-17	1.037	0.598	0.671	6.91961e-13	c-Kit+ ILC2_c2
RNF19A	3.08595e-13	1.02948	0.492	0.451	3.55964e-09	c-Kit+ ILC2_c2
CLK1	1.62872e-28	1.02554	0.737	0.681	1.87873e-24	c-Kit+ ILC2_c2
SFPQ	4.45487e-28	1.02516	0.658	0.636	5.1387e-24	c-Kit+ ILC2_c2
HMGCS1	8.75792e-09	1.01993	0.294	0.226	0.000101023	c-Kit+ ILC2_c2
KDM1A	6.20366e-24	1.01467	0.298	0.153	7.15592e-20	c-Kit+ ILC2_c2
CDK17	1.79568e-26	1.01081	0.435	0.281	2.07132e-22	c-Kit+ ILC2_c2
ATP1B3	1.31181e-15	1.0096	0.389	0.28	1.51317e-11	c-Kit+ ILC2_c2
NPEPPS	1.01578e-17	1.00468	0.411	0.308	1.1717e-13	c-Kit+ ILC2_c2
RBM25	1.01825e-13	1.00233	0.552	0.575	1.17455e-09	c-Kit+ ILC2_c2
USP9Y	2.47667e-20	1.00043	0.309	0.173	2.85684e-16	c-Kit+ ILC2_c2
HNRNPU	9.12537e-19	1.00026	0.68	0.74	1.05261e-14	c-Kit+ ILC2_c2
CRY1	1.55348e-14	0.989813	0.36	0.265	1.79194e-10	c-Kit+ ILC2_c2
IRF1	1.3531e-30	0.987269	0.7	0.63	1.56081e-26	c-Kit+ ILC2_c2	Yes
DENND4A	6.86922e-07	0.98425	0.413	0.417	0.00792365	c-Kit+ ILC2_c2
PPP1R10	1.7966e-11	0.983338	0.393	0.333	2.07238e-07	c-Kit+ ILC2_c2
DJB6	1.17665e-14	0.98183	0.541	0.528	1.35726e-10	c-Kit+ ILC2_c2
AFF4	1.85709e-15	0.976875	0.406	0.306	2.14215e-11	c-Kit+ ILC2_c2
ARID4B	6.74422e-15	0.972971	0.567	0.587	7.77946e-11	c-Kit+ ILC2_c2
CHD1	1.7611e-12	0.971112	0.523	0.545	2.03143e-08	c-Kit+ ILC2_c2
AGO2	4.20311e-14	0.969921	0.391	0.309	4.84829e-10	c-Kit+ ILC2_c2
ANKRD36	6.87244e-07	0.966122	0.364	0.35	0.00792735	c-Kit+ ILC2_c2
KCNQ1OT1	1.3586e-18	0.965862	0.194	0.082	1.56715e-14	c-Kit+ ILC2_c2
TNFRSF9	1.52217e-25	0.959742	0.291	0.128	1.75582e-21	c-Kit+ ILC2_c2		TNFRSF9
RIOK3	6.42494e-14	0.956516	0.36	0.264	7.41117e-10	c-Kit+ ILC2_c2
CDKN1B	6.56847e-12	0.951609	0.358	0.278	7.57673e-08	c-Kit+ ILC2_c2
FSTL4	2.26221e-47	0.951035	0.23	0.059	2.60946e-43	c-Kit+ ILC2_c2
KMT2E	7.71022e-31	0.950883	0.735	0.754	8.89374e-27	c-Kit+ ILC2_c2
GALC	6.39335e-09	0.943645	0.309	0.246	7.37472e-05	c-Kit+ ILC2_c2
KLHL6	1.23906e-12	0.939528	0.351	0.264	1.42926e-08	c-Kit+ ILC2_c2
SIK3	6.53607e-07	0.935372	0.32	0.281	0.00753935	c-Kit+ ILC2_c2
CYP51A1	5.23604e-29	0.935339	0.249	0.097	6.03977e-25	c-Kit+ ILC2_c2
PARP8	1.02814e-15	0.932357	0.523	0.478	1.18596e-11	c-Kit+ ILC2_c2
FAAH2	7.89562e-34	0.930461	0.21	0.065	9.1076e-30	c-Kit+ ILC2_c2
FL	1.11543e-06	0.927902	0.47	0.508	0.0128665	c-Kit+ ILC2_c2
ITGA4	1.48465e-07	0.927766	0.437	0.433	0.00171254	c-Kit+ ILC2_c2
SLC38A2	3.45956e-19	0.915862	0.525	0.441	3.99061e-15	c-Kit+ ILC2_c2
POR	7.3808e-12	0.913802	0.269	0.178	8.51375e-08	c-Kit+ ILC2_c2
PRKX	8.93602e-12	0.907802	0.397	0.334	1.03077e-07	c-Kit+ ILC2_c2
BORCS5	1.55625e-06	0.906778	0.256	0.204	0.0179514	c-Kit+ ILC2_c2
SMC4	8.10768e-11	0.904126	0.338	0.262	9.35221e-07	c-Kit+ ILC2_c2
DDX3Y	4.46054e-27	0.89143	0.583	0.436	5.14524e-23	c-Kit+ ILC2_c2
RNF168	1.50885e-06	0.889959	0.34	0.31	0.0174046	c-Kit+ ILC2_c2
IDS	4.8707e-09	0.889221	0.523	0.569	5.61836e-05	c-Kit+ ILC2_c2
RSRP1	2.0661e-16	0.887853	0.631	0.633	2.38325e-12	c-Kit+ ILC2_c2
MT-ND4L	3.44886e-28	0.884801	0.905	0.926	3.97826e-24	c-Kit+ ILC2_c2
HSPD1	4.18885e-56	0.884644	0.788	0.608	4.83184e-52	c-Kit+ ILC2_c2
CCNL1	3.5352e-27	0.881795	0.709	0.676	4.07785e-23	c-Kit+ ILC2_c2
DAPK1	9.80725e-43	0.879003	0.236	0.068	1.13127e-38	c-Kit+ ILC2_c2
TAB3	1.29861e-19	0.876209	0.243	0.119	1.49794e-15	c-Kit+ ILC2_c2
MCL1	1.7624e-30	0.874207	0.817	0.773	2.03293e-26	c-Kit+ ILC2_c2
ADGRE5	1.43872e-16	0.873819	0.669	0.703	1.65956e-12	c-Kit+ ILC2_c2
G13	3.81157e-08	0.871829	0.384	0.348	0.000439665	c-Kit+ ILC2_c2
DUSP4	4.75176e-38	0.868516	0.464	0.231	5.48115e-34	c-Kit+ ILC2_c2
PCNX1	3.82989e-08	0.866721	0.4	0.369	0.000441778	c-Kit+ ILC2_c2
GOLGB1	3.59049e-09	0.864741	0.468	0.449	4.14163e-05	c-Kit+ ILC2_c2
PTPRC	3.30778e-31	0.864294	0.823	0.835	3.81553e-27	c-Kit+ ILC2_c2
SC5D	6.25616e-13	0.862392	0.265	0.162	7.21648e-09	c-Kit+ ILC2_c2
NCL	1.55449e-11	0.860603	0.627	0.744	1.7931e-07	c-Kit+ ILC2_c2
KIT	2.95295e-16	0.860525	0.625	0.539	3.40622e-12	c-Kit+ ILC2_c2		KIT
GDPD5	1.20322e-33	0.85444	0.243	0.086	1.38792e-29	c-Kit+ ILC2_c2
STK17B	6.1955e-18	0.852789	0.68	0.756	7.14651e-14	c-Kit+ ILC2_c2
HOOK3	1.73442e-06	0.849131	0.294	0.25	0.0200065	c-Kit+ ILC2_c2
FGL2	1.33285e-22	0.845672	0.177	0.062	1.53744e-18	c-Kit+ ILC2_c2
ARHGEF7	6.58299e-08	0.842834	0.342	0.29	0.000759348	c-Kit+ ILC2_c2
BHLHE40	1.67301e-08	0.841575	0.532	0.544	0.000192981	c-Kit+ ILC2_c2	Yes
PTGER4	3.82007e-17	0.84129	0.609	0.544	4.40645e-13	c-Kit+ ILC2_c2
TGFBR3	3.58759e-19	0.838687	0.236	0.111	4.13829e-15	c-Kit+ ILC2_c2
RIC1	8.8682e-25	0.83572	0.267	0.123	1.02295e-20	c-Kit+ ILC2_c2
VCP	1.43889e-13	0.835247	0.519	0.48	1.65976e-09	c-Kit+ ILC2_c2
HSP90B1	1.5914e-07	0.834081	0.6	0.687	0.00183568	c-Kit+ ILC2_c2
PRPF38B	1.1871e-07	0.83332	0.446	0.44	0.00136932	c-Kit+ ILC2_c2
LRRFIP1	3.62739e-08	0.833282	0.574	0.677	0.000418419	c-Kit+ ILC2_c2
ERN1	2.00513e-12	0.82925	0.556	0.571	2.31291e-08	c-Kit+ ILC2_c2
RTN4	1.71152e-13	0.826127	0.503	0.463	1.97424e-09	c-Kit+ ILC2_c2
STAT3	1.04767e-08	0.815171	0.521	0.559	0.000120849	c-Kit+ ILC2_c2	Yes
ERO1B	1.27736e-13	0.814813	0.258	0.152	1.47344e-09	c-Kit+ ILC2_c2
DYNC1H1	3.33618e-06	0.808205	0.442	0.448	0.0384828	c-Kit+ ILC2_c2
GRASP	3.48754e-07	0.804461	0.241	0.178	0.00402288	c-Kit+ ILC2_c2
FAS	1.0658e-19	0.803031	0.258	0.128	1.2294e-15	c-Kit+ ILC2_c2		FAS
NEK1	2.40025e-09	0.800386	0.267	0.19	2.76869e-05	c-Kit+ ILC2_c2
ARHGAP5	8.98293e-09	0.79989	0.287	0.217	0.000103618	c-Kit+ ILC2_c2
NKTR	8.93699e-11	0.797844	0.567	0.589	1.03088e-06	c-Kit+ ILC2_c2
ABCC1	4.0765e-06	0.796581	0.369	0.355	0.0470224	c-Kit+ ILC2_c2
SLC25A3	6.31048e-08	0.795138	0.55	0.583	0.000727914	c-Kit+ ILC2_c2
AKIRIN2	5.79506e-08	0.795026	0.294	0.234	0.00066846	c-Kit+ ILC2_c2
JARID2	1.98759e-08	0.794479	0.375	0.328	0.000229268	c-Kit+ ILC2_c2
IDI1	7.00657e-08	0.789223	0.349	0.296	0.000808208	c-Kit+ ILC2_c2
HIF1A	4.98249e-07	0.787689	0.446	0.446	0.00574731	c-Kit+ ILC2_c2	Yes
RHOH	7.05209e-08	0.782951	0.424	0.411	0.000813458	c-Kit+ ILC2_c2
CCR4	4.03171e-22	0.781874	0.221	0.093	4.65058e-18	c-Kit+ ILC2_c2		CCR4
PTPN1	2.85065e-06	0.778184	0.333	0.3	0.0328823	c-Kit+ ILC2_c2
ATP11B	2.77421e-06	0.776659	0.327	0.294	0.0320005	c-Kit+ ILC2_c2
EIF2AK3	4.20054e-20	0.775284	0.247	0.117	4.84532e-16	c-Kit+ ILC2_c2
NUFIP2	6.16342e-09	0.769827	0.342	0.276	7.1095e-05	c-Kit+ ILC2_c2
NR4A3	1.11564e-10	0.766526	0.4	0.325	1.2869e-06	c-Kit+ ILC2_c2	Yes
ANKHD1	3.70206e-13	0.766008	0.302	0.198	4.27033e-09	c-Kit+ ILC2_c2
PRRC2C	3.00118e-06	0.763055	0.596	0.741	0.0346187	c-Kit+ ILC2_c2
EDEM3	1.60904e-08	0.758879	0.254	0.181	0.000185603	c-Kit+ ILC2_c2
SRSF11	2.94329e-12	0.758874	0.609	0.665	3.39509e-08	c-Kit+ ILC2_c2
PTGS2	5.34249e-33	0.75842	0.347	0.151	6.16256e-29	c-Kit+ ILC2_c2
BCL11B	6.12155e-12	0.757074	0.23	0.133	7.06121e-08	c-Kit+ ILC2_c2	Yes
MT-CO3	1.31161e-47	0.755796	0.982	0.987	1.51295e-43	c-Kit+ ILC2_c2
OXSR1	1.45424e-11	0.752587	0.258	0.166	1.67747e-07	c-Kit+ ILC2_c2
FNDC3B	1.63317e-10	0.752417	0.258	0.171	1.88386e-06	c-Kit+ ILC2_c2
NCOA3	2.05189e-07	0.745711	0.272	0.211	0.00236686	c-Kit+ ILC2_c2	Yes
A16	6.83357e-09	0.738557	0.276	0.201	7.88253e-05	c-Kit+ ILC2_c2
SKI	5.50615e-07	0.734655	0.249	0.187	0.00635135	c-Kit+ ILC2_c2	Yes
VCPIP1	1.05823e-11	0.733428	0.256	0.161	1.22067e-07	c-Kit+ ILC2_c2
UBE2D3	1.54809e-06	0.728246	0.598	0.737	0.0178572	c-Kit+ ILC2_c2
H3F3B	7.31452e-41	0.721331	0.951	0.954	8.4373e-37	c-Kit+ ILC2_c2
NUP58	1.60953e-06	0.716782	0.263	0.21	0.0185659	c-Kit+ ILC2_c2
LINC-PINT	2.63884e-16	0.71304	0.377	0.249	3.0439e-12	c-Kit+ ILC2_c2
C12orf57	8.95131e-09	0.711307	0.166	0.34	0.000103253	c-Kit+ ILC2_c2
ZEB2	5.11381e-07	0.710518	0.265	0.197	0.00589878	c-Kit+ ILC2_c2	Yes
IVNS1ABP	1.51659e-13	0.709931	0.585	0.553	1.74939e-09	c-Kit+ ILC2_c2
GAB2	1.61315e-15	0.702477	0.21	0.105	1.86077e-11	c-Kit+ ILC2_c2
USP46	1.1619e-17	0.702009	0.17	0.069	1.34025e-13	c-Kit+ ILC2_c2
TXNRD1	5.99923e-08	0.691205	0.234	0.162	0.000692011	c-Kit+ ILC2_c2
MBOAT2	8.20845e-15	0.68966	0.203	0.101	9.46845e-11	c-Kit+ ILC2_c2
GADD45B	2.82636e-08	0.689168	0.514	0.523	0.00032602	c-Kit+ ILC2_c2
ANTXR2	5.51761e-13	0.678154	0.181	0.09	6.36456e-09	c-Kit+ ILC2_c2
SAT1	2.09979e-06	0.67324	0.521	0.533	0.024221	c-Kit+ ILC2_c2
STK24	5.71346e-08	0.671274	0.269	0.198	0.000659047	c-Kit+ ILC2_c2
RUNX1	1.52615e-09	0.666746	0.185	0.108	1.76041e-05	c-Kit+ ILC2_c2	Yes
PRKAR2A	2.87972e-07	0.661738	0.28	0.215	0.00332176	c-Kit+ ILC2_c2
PLK3	2.21298e-07	0.657146	0.256	0.189	0.00255267	c-Kit+ ILC2_c2
ZNF10	1.5156e-09	0.650807	0.214	0.132	1.74825e-05	c-Kit+ ILC2_c2	Yes
GPAT3	8.75051e-43	0.638868	0.141	0.025	1.00937e-38	c-Kit+ ILC2_c2
SLC19A2	9.60032e-12	0.63786	0.19	0.101	1.1074e-07	c-Kit+ ILC2_c2
ATXN7	2.76269e-11	0.636807	0.194	0.106	3.18677e-07	c-Kit+ ILC2_c2
ABCG1	9.59392e-09	0.633534	0.214	0.136	0.000110666	c-Kit+ ILC2_c2
DGKH	3.05924e-13	0.625864	0.139	0.058	3.52884e-09	c-Kit+ ILC2_c2
SYNE2	3.64265e-14	0.622659	0.402	0.276	4.2018e-10	c-Kit+ ILC2_c2
EFNB1	9.29102e-21	0.616721	0.161	0.056	1.07172e-16	c-Kit+ ILC2_c2
SFXN1	3.19429e-06	0.613538	0.221	0.163	0.0368461	c-Kit+ ILC2_c2
PIK3CB	1.37386e-07	0.611475	0.183	0.116	0.00158474	c-Kit+ ILC2_c2
BTBD9	1.78232e-07	0.609813	0.199	0.13	0.0020559	c-Kit+ ILC2_c2
PELI1	7.48853e-08	0.604544	0.208	0.134	0.000863802	c-Kit+ ILC2_c2
BCAR3	1.49719e-34	0.595733	0.135	0.028	1.72701e-30	c-Kit+ ILC2_c2
IL17RB	2.08469e-14	0.595338	0.185	0.085	2.40469e-10	c-Kit+ ILC2_c2		IL17RB
IRS2	3.27999e-06	0.590422	0.252	0.194	0.0378347	c-Kit+ ILC2_c2
PHTF1	4.24216e-06	0.590318	0.236	0.18	0.0489334	c-Kit+ ILC2_c2
PLAGL1	4.0317e-08	0.590185	0.159	0.092	0.000465057	c-Kit+ ILC2_c2	Yes
JUN	3.92477e-16	0.580987	0.698	0.658	4.52722e-12	c-Kit+ ILC2_c2	Yes
INSIG1	1.92959e-13	0.580874	0.369	0.25	2.22578e-09	c-Kit+ ILC2_c2
HERC5	4.71181e-08	0.554778	0.17	0.1	0.000543507	c-Kit+ ILC2_c2
KP2	2.61121e-07	0.550729	0.214	0.145	0.00301203	c-Kit+ ILC2_c2
PLIN2	9.57461e-16	0.547905	0.43	0.296	1.10443e-11	c-Kit+ ILC2_c2
ATP1A4	1.40952e-34	0.547035	0.135	0.028	1.62589e-30	c-Kit+ ILC2_c2
HYMAI	1.74465e-14	0.535987	0.113	0.039	2.01245e-10	c-Kit+ ILC2_c2
SYNJ2	1.99622e-06	0.531011	0.185	0.125	0.0230263	c-Kit+ ILC2_c2
SIAH2	4.0868e-06	0.526435	0.192	0.132	0.0471412	c-Kit+ ILC2_c2
NSF	1.82875e-10	0.514536	0.181	0.097	2.10946e-06	c-Kit+ ILC2_c2
CHDH	7.30015e-18	0.514477	0.137	0.047	8.42072e-14	c-Kit+ ILC2_c2
LDLR	4.27252e-14	0.511016	0.17	0.076	4.92835e-10	c-Kit+ ILC2_c2
DMD	1.16203e-19	0.505584	0.117	0.034	1.3404e-15	c-Kit+ ILC2_c2
NDFIP2	3.18735e-13	0.488856	0.15	0.066	3.67661e-09	c-Kit+ ILC2_c2
ECE1	2.71463e-06	0.488483	0.163	0.105	0.0313132	c-Kit+ ILC2_c2
HIST1H2BN	2.34263e-09	0.480901	0.132	0.065	2.70222e-05	c-Kit+ ILC2_c2
FBXO11	2.20967e-09	0.472473	0.152	0.078	2.54885e-05	c-Kit+ ILC2_c2
AC016831.7	1.50018e-43	0.470776	0.115	0.016	1.73046e-39	c-Kit+ ILC2_c2
NPIPB5	1.36552e-16	0.463164	0.185	0.078	1.57513e-12	c-Kit+ ILC2_c2
CCPG1	1.20925e-10	0.451584	0.135	0.062	1.39487e-06	c-Kit+ ILC2_c2
EEF2K	1.0912e-07	0.449727	0.121	0.063	0.0012587	c-Kit+ ILC2_c2
ALG13	4.10661e-08	0.424149	0.139	0.297	0.000473698	c-Kit+ ILC2_c2
MYRF	1.54159e-24	0.422478	0.11	0.026	1.77822e-20	c-Kit+ ILC2_c2	Yes
CALCRL	3.38216e-13	0.4075	0.084	0.026	3.90132e-09	c-Kit+ ILC2_c2
NOCT	1.55948e-09	0.402866	0.121	0.055	1.79886e-05	c-Kit+ ILC2_c2
WARS2	3.66863e-15	0.39968	0.126	0.045	4.23177e-11	c-Kit+ ILC2_c2
KLC1	4.28458e-11	0.392208	0.161	0.078	4.94226e-07	c-Kit+ ILC2_c2
RBM34	3.16197e-18	0.39095	0.115	0.034	3.64734e-14	c-Kit+ ILC2_c2
HSPH1	7.2764e-23	0.366667	0.649	0.518	8.39333e-19	c-Kit+ ILC2_c2
SMAP1	6.74699e-07	0.363611	0.181	0.35	0.00778265	c-Kit+ ILC2_c2
TNRC6B	1.00966e-07	0.341614	0.316	0.591	0.00116464	c-Kit+ ILC2_c2
YWHAE	1.84803e-08	0.331089	0.201	0.411	0.000213171	c-Kit+ ILC2_c2
NBPF14	3.91982e-08	0.328777	0.097	0.23	0.000452152	c-Kit+ ILC2_c2
ZNF394	3.75411e-08	0.322963	0.17	0.351	0.000433036	c-Kit+ ILC2_c2	Yes
ITGA2	2.08087e-13	0.321976	0.053	0.011	2.40028e-09	c-Kit+ ILC2_c2
LRRN1	7.85743e-07	0.319124	0.057	0.022	0.00906355	c-Kit+ ILC2_c2
KLF6	8.81172e-32	0.316354	0.94	0.905	1.01643e-27	c-Kit+ ILC2_c2	Yes
TCERG1	3.03204e-06	0.313804	0.17	0.322	0.0349746	c-Kit+ ILC2_c2
SNHG5	1.47519e-21	0.304899	0.265	0.648	1.70163e-17	c-Kit+ ILC2_c2
ARID1B	8.4168e-07	0.300571	0.236	0.428	0.00970878	c-Kit+ ILC2_c2
ASB3	1.12832e-11	0.293228	0.079	0.025	1.30152e-07	c-Kit+ ILC2_c2
CMTM8	5.04824e-07	0.290761	0.086	0.039	0.00582315	c-Kit+ ILC2_c2
EHMT1	6.05148e-07	0.289349	0.15	0.301	0.00698038	c-Kit+ ILC2_c2
P2RY1	7.18745e-09	0.286686	0.093	0.038	8.29072e-05	c-Kit+ ILC2_c2
SEC61B	4.00134e-08	0.285334	0.221	0.434	0.000461554	c-Kit+ ILC2_c2
CTH	1.05977e-08	0.284414	0.073	0.027	0.000122245	c-Kit+ ILC2_c2
RIN3	1.46366e-08	0.282759	0.216	0.436	0.000168833	c-Kit+ ILC2_c2
SPCS2	1.2991e-10	0.276888	0.124	0.301	1.49851e-06	c-Kit+ ILC2_c2
RAD50	2.18975e-13	0.27343	0.077	0.022	2.52588e-09	c-Kit+ ILC2_c2
EGLN3	4.98334e-07	0.269924	0.064	0.025	0.00574828	c-Kit+ ILC2_c2
ZFP36	2.85499e-10	0.268443	0.907	0.879	3.29323e-06	c-Kit+ ILC2_c2
PCBP1	1.13426e-08	0.266015	0.362	0.679	0.000130837	c-Kit+ ILC2_c2
CCDC144A	5.1343e-18	0.258769	0.088	0.021	5.92241e-14	c-Kit+ ILC2_c2
FBXL22	7.97876e-16	0.250354	0.068	0.015	9.2035e-12	c-Kit+ ILC2_c2

## Sheet: ILC3_c1
gene	p_val	avg_log2FC	pct.1	pct.2	p_val_adj	cluster	Is_TF	KEGG_CYTOKINE_CYTOKINE_RECEPTOR_INTERACTION	CYTOKINE
ICOS	2.69882e-198	1.79932	0.608	0.233	3.11309e-194	ILC3_c1
KIT	0	1.66679	0.936	0.435	0	ILC3_c1		KIT
LIF	0	1.66163	0.65	0.159	0	ILC3_c1		LIF	LIF
CD83	4.45313e-184	1.5573	0.57	0.205	5.13669e-180	ILC3_c1
FOS	4.2298e-178	1.52138	0.975	0.859	4.87908e-174	ILC3_c1	Yes
NR4A2	3.7205e-103	1.50854	0.733	0.457	4.2916e-99	ILC3_c1	Yes
TTN	3.48639e-94	1.43866	0.552	0.269	4.02155e-90	ILC3_c1
IL22	4.18847e-22	1.41807	0.049	0.01	4.8314e-18	ILC3_c1		IL22
TIPARP	4.22705e-237	1.40592	0.746	0.312	4.8759e-233	ILC3_c1
LDLRAD4	1.32133e-235	1.39109	0.639	0.225	1.52416e-231	ILC3_c1
ALDOC	1.06194e-276	1.34155	0.602	0.154	1.22495e-272	ILC3_c1
CXCR4	2.16713e-183	1.29726	0.945	0.763	2.49979e-179	ILC3_c1		CXCR4
PTGS2	1.31292e-28	1.27959	0.255	0.139	1.51446e-24	ILC3_c1
RGS1	5.15281e-105	1.19888	0.834	0.578	5.94377e-101	ILC3_c1
DST	0	1.14342	0.625	0.148	0	ILC3_c1
PCDH9	7.04424e-260	1.09212	0.635	0.178	8.12553e-256	ILC3_c1
NR4A3	1.78034e-188	1.07046	0.646	0.241	2.05362e-184	ILC3_c1	Yes
IL1R1	0	1.05964	0.765	0.177	0	ILC3_c1		IL1R1
ATF3	1.98384e-94	1.05409	0.391	0.146	2.28836e-90	ILC3_c1	Yes
IL23R	0	1.0508	0.69	0.16	0	ILC3_c1		IL23R
FOSB	7.46561e-136	1.03299	0.955	0.693	8.61159e-132	ILC3_c1	Yes
MAP3K8	2.53491e-154	1.01854	0.792	0.448	2.92401e-150	ILC3_c1
NCOA7	1.87064e-225	1.01794	0.773	0.328	2.15779e-221	ILC3_c1
IRF4	2.54055e-242	1.01411	0.475	0.096	2.93053e-238	ILC3_c1	Yes
CASP3	1.84164e-242	1.00581	0.581	0.164	2.12433e-238	ILC3_c1
CTSH	0	1.00214	0.544	0.1	0	ILC3_c1
RANBP2	4.299e-84	1.00132	0.699	0.396	4.9589e-80	ILC3_c1
CSF2	6.47758e-118	0.997438	0.321	0.085	7.47189e-114	ILC3_c1		CSF2	CSF2
PFKFB3	4.61134e-253	0.99235	0.701	0.236	5.31918e-249	ILC3_c1
SPRY1	1.68525e-249	0.960092	0.677	0.213	1.94394e-245	ILC3_c1
TP53INP1	9.96125e-167	0.925129	0.573	0.213	1.14903e-162	ILC3_c1
CAT	1.98711e-212	0.913869	0.692	0.263	2.29213e-208	ILC3_c1
CXCL8	1.09611e-51	0.912405	0.145	0.038	1.26436e-47	ILC3_c1		CXCL8
DLL1	9.25301e-193	0.910653	0.608	0.198	1.06733e-188	ILC3_c1
SLA	7.3685e-103	0.907596	0.767	0.479	8.49956e-99	ILC3_c1
LTA4H	1.63569e-169	0.906414	0.623	0.256	1.88677e-165	ILC3_c1
TNFAIP3	5.16921e-130	0.906046	0.99	0.864	5.96269e-126	ILC3_c1
GSN	2.13692e-257	0.892007	0.682	0.212	2.46494e-253	ILC3_c1
BTG2	3.72155e-127	0.889532	0.843	0.553	4.29281e-123	ILC3_c1
MGAT4A	3.00298e-189	0.869546	0.742	0.331	3.46394e-185	ILC3_c1
PRMT9	4.09239e-266	0.845428	0.703	0.211	4.72057e-262	ILC3_c1
MPZL3	7.0147e-108	0.830872	0.537	0.251	8.09146e-104	ILC3_c1
RORC	1.11375e-259	0.786843	0.534	0.119	1.28471e-255	ILC3_c1	Yes
KIAA1324	2.44619e-205	0.782371	0.535	0.151	2.82168e-201	ILC3_c1
IL4I1	8.955e-285	0.780918	0.761	0.248	1.03296e-280	ILC3_c1
JMY	1.20809e-232	0.774876	0.662	0.207	1.39353e-228	ILC3_c1
CTNNB1	2.98373e-116	0.769089	0.834	0.556	3.44173e-112	ILC3_c1
BHLHE40	6.23096e-97	0.738625	0.769	0.479	7.18741e-93	ILC3_c1	Yes
IL7R	1.03329e-86	0.712359	0.972	0.799	1.1919e-82	ILC3_c1		IL7R
SLC1A4	1.46047e-230	0.695011	0.475	0.102	1.68465e-226	ILC3_c1
TAGAP	3.33704e-73	0.688096	0.601	0.351	3.84927e-69	ILC3_c1
AFF3	3.67941e-286	0.661345	0.73	0.217	4.2442e-282	ILC3_c1
ZFP36	4.66539e-75	0.648485	0.957	0.86	5.38153e-71	ILC3_c1
MACF1	1.32809e-95	0.647752	0.866	0.62	1.53195e-91	ILC3_c1
FOSL2	9.72295e-78	0.646627	0.658	0.388	1.12154e-73	ILC3_c1	Yes
NRIP1	4.7313e-192	0.634734	0.597	0.193	5.45755e-188	ILC3_c1
ZFAND5	8.15893e-77	0.621599	0.792	0.514	9.41132e-73	ILC3_c1
SKIL	7.54727e-127	0.615691	0.627	0.29	8.70577e-123	ILC3_c1	Yes
SLC4A10	5.87692e-273	0.61432	0.549	0.118	6.77903e-269	ILC3_c1
VWA5A	1.58511e-149	0.609547	0.454	0.141	1.82842e-145	ILC3_c1
PTGER4	5.48554e-69	0.607179	0.726	0.499	6.32756e-65	ILC3_c1
PLXNC1	6.68106e-256	0.600603	0.555	0.131	7.7066e-252	ILC3_c1
TIAM1	4.3313e-84	0.595142	0.519	0.24	4.99615e-80	ILC3_c1
MAFF	1.68435e-131	0.584845	0.658	0.298	1.94289e-127	ILC3_c1	Yes
TNFSF11	1.26628e-165	0.58279	0.494	0.151	1.46066e-161	ILC3_c1		TNFSF11	TNFSF11
AREG	6.17569e-86	0.580651	0.868	0.543	7.12366e-82	ILC3_c1
MATN2	1.32387e-186	0.573195	0.359	0.068	1.52708e-182	ILC3_c1
ABHD15	6.83281e-180	0.561836	0.513	0.15	7.88165e-176	ILC3_c1
GOLGA8A	7.30029e-202	0.560726	0.778	0.325	8.42088e-198	ILC3_c1
TSC22D1	2.08055e-85	0.558449	0.289	0.092	2.39992e-81	ILC3_c1	Yes
GOLGA8B	1.51154e-148	0.555474	0.845	0.428	1.74356e-144	ILC3_c1
HCG18	6.29667e-107	0.554906	0.508	0.212	7.26321e-103	ILC3_c1
ADAM10	1.43132e-114	0.551672	0.695	0.355	1.65103e-110	ILC3_c1
CXCL2	5.15877e-48	0.541709	0.157	0.047	5.95064e-44	ILC3_c1		CXCL2
DCAF11	9.84432e-119	0.540262	0.525	0.215	1.13554e-114	ILC3_c1
LINC00299	4.73997e-273	0.539486	0.707	0.204	5.46755e-269	ILC3_c1
TNFRSF25	3.83544e-131	0.536461	0.749	0.363	4.42418e-127	ILC3_c1		TNFRSF25
TNFSF13B	1.18556e-230	0.533984	0.599	0.158	1.36755e-226	ILC3_c1		TNFSF13B	TNFSF13B
PTPN22	5.67293e-138	0.533602	0.755	0.358	6.54373e-134	ILC3_c1
RBPJ	7.96822e-74	0.526258	0.672	0.383	9.19134e-70	ILC3_c1	Yes
TNS3	8.33617e-244	0.526207	0.39	0.055	9.61577e-240	ILC3_c1
TLE1	1.0042e-97	0.525828	0.659	0.309	1.15834e-93	ILC3_c1
PDE4B	2.53129e-92	0.521364	0.575	0.276	2.91984e-88	ILC3_c1
F2R	1.01447e-137	0.518481	0.405	0.117	1.17019e-133	ILC3_c1
PRNP	3.75454e-57	0.5171	0.655	0.426	4.33087e-53	ILC3_c1
EIF4G2	9.46408e-61	0.515574	0.886	0.722	1.09168e-56	ILC3_c1
NEO1	9.24797e-201	0.510772	0.399	0.077	1.06675e-196	ILC3_c1
STAT1	1.75546e-30	0.500322	0.449	0.296	2.02492e-26	ILC3_c1	Yes
TRBC1	4.90916e-96	0.492944	0.845	0.596	5.66271e-92	ILC3_c1
CERK	2.472e-146	0.490038	0.629	0.255	2.85146e-142	ILC3_c1
DDX3X	1.89118e-67	0.488585	0.875	0.666	2.18148e-63	ILC3_c1
B3GALT5	0	0.48181	0.434	0.03	0	ILC3_c1
PPP1R9A	1.0673e-200	0.481311	0.403	0.08	1.23113e-196	ILC3_c1
ARL5B	8.3502e-122	0.476778	0.425	0.142	9.63196e-118	ILC3_c1
TGM2	1.82221e-233	0.473656	0.398	0.062	2.10192e-229	ILC3_c1
KMT2C	5.44788e-92	0.472206	0.735	0.414	6.28413e-88	ILC3_c1
H2AFY	5.93509e-124	0.471806	0.711	0.335	6.84613e-120	ILC3_c1
ATP8B4	1.21562e-190	0.471193	0.618	0.202	1.40222e-186	ILC3_c1
IKZF2	3.42519e-187	0.47012	0.516	0.146	3.95095e-183	ILC3_c1	Yes
RPS6KA3	1.28346e-89	0.46907	0.708	0.393	1.48048e-85	ILC3_c1
SGK1	5.13736e-22	0.468077	0.251	0.147	5.92594e-18	ILC3_c1
VPS13C	1.49215e-85	0.466963	0.745	0.439	1.72119e-81	ILC3_c1
FES	4.73927e-136	0.45724	0.571	0.22	5.46675e-132	ILC3_c1
CD69	5.81318e-40	0.456643	0.898	0.77	6.7055e-36	ILC3_c1
F13A1	1.38983e-139	0.454058	0.184	0.017	1.60317e-135	ILC3_c1
CD164	5.92459e-64	0.454029	0.726	0.494	6.83402e-60	ILC3_c1
JUND	2.24125e-07	0.452259	0.907	0.696	0.00258528	ILC3_c1	Yes
PIK3CD	7.58608e-137	0.448608	0.651	0.283	8.75054e-133	ILC3_c1
NR4A1	1.84613e-139	0.445675	0.72	0.33	2.12951e-135	ILC3_c1	Yes
AHR	4.79537e-86	0.445119	0.762	0.402	5.53146e-82	ILC3_c1	Yes
ITM2B	3.36517e-59	0.443572	0.908	0.732	3.88172e-55	ILC3_c1
PDZD2	9.67743e-255	0.44299	0.384	0.05	1.11629e-250	ILC3_c1
YPEL5	3.15494e-39	0.43957	0.747	0.541	3.63923e-35	ILC3_c1
ARHGEF7	2.42783e-50	0.437719	0.465	0.246	2.8005e-46	ILC3_c1
HDLBP	7.30965e-112	0.43712	0.62	0.282	8.43168e-108	ILC3_c1
KLF4	1.11078e-89	0.435924	0.315	0.101	1.28128e-85	ILC3_c1	Yes
GYG1	2.27437e-73	0.433887	0.387	0.165	2.62349e-69	ILC3_c1
ENPP1	7.73004e-179	0.433378	0.39	0.084	8.9166e-175	ILC3_c1
ENTPD1	8.88365e-95	0.433224	0.274	0.076	1.02473e-90	ILC3_c1
MVB12B	5.83385e-221	0.430985	0.408	0.072	6.72935e-217	ILC3_c1
PCNX2	2.43092e-139	0.42988	0.414	0.122	2.80406e-135	ILC3_c1
INPP4A	2.5115e-128	0.428601	0.648	0.28	2.89701e-124	ILC3_c1
NOTCH2	7.93628e-138	0.428369	0.576	0.221	9.1545e-134	ILC3_c1
P1L1	2.52817e-88	0.427309	0.859	0.554	2.91624e-84	ILC3_c1
ENO1	4.24742e-59	0.423176	0.79	0.56	4.8994e-55	ILC3_c1
PPP1R15B	8.48145e-86	0.421696	0.616	0.315	9.78335e-82	ILC3_c1
HERPUD1	4.61011e-30	0.420939	0.599	0.447	5.31776e-26	ILC3_c1
PPP2CA	5.8452e-55	0.418875	0.637	0.402	6.74244e-51	ILC3_c1
SLC41A1	4.64506e-110	0.418073	0.274	0.065	5.35807e-106	ILC3_c1
CA2	2.31367e-144	0.417437	0.353	0.086	2.66881e-140	ILC3_c1
RBL2	2.83311e-70	0.416995	0.657	0.393	3.26799e-66	ILC3_c1
COL4A3	1.34952e-197	0.416041	0.288	0.035	1.55667e-193	ILC3_c1
TBC1D31	2.86129e-101	0.415163	0.385	0.138	3.30049e-97	ILC3_c1
MGAT5	8.81628e-119	0.414737	0.568	0.238	1.01696e-114	ILC3_c1
ATM	1.28579e-83	0.411821	0.758	0.45	1.48316e-79	ILC3_c1
PECAM1	2.22291e-81	0.411554	0.363	0.141	2.56413e-77	ILC3_c1
LST1	3.22119e-201	0.411225	0.808	0.297	3.71564e-197	ILC3_c1
BCL2A1	5.55971e-126	0.410209	0.35	0.093	6.41312e-122	ILC3_c1
PLXDC2	4.74526e-112	0.410108	0.366	0.114	5.47365e-108	ILC3_c1
STAC	1.96186e-159	0.409914	0.271	0.042	2.26301e-155	ILC3_c1
PRR5	6.9368e-244	0.407579	0.634	0.166	8.0016e-240	ILC3_c1
FYCO1	2.47356e-108	0.401331	0.386	0.129	2.85326e-104	ILC3_c1
HUWE1	2.42246e-95	0.397959	0.687	0.357	2.79431e-91	ILC3_c1
FURIN	2.47234e-125	0.395186	0.658	0.283	2.85184e-121	ILC3_c1
ELOVL6	1.16491e-77	0.394618	0.336	0.127	1.34372e-73	ILC3_c1
IVNS1ABP	1.24636e-29	0.392242	0.687	0.518	1.43768e-25	ILC3_c1
TCF7	4.11191e-87	0.392116	0.781	0.426	4.74309e-83	ILC3_c1	Yes
PRKAR1A	1.24793e-89	0.390797	0.656	0.357	1.43949e-85	ILC3_c1
LPXN	8.33298e-104	0.38934	0.721	0.378	9.6121e-100	ILC3_c1
ZBTB1	7.53042e-58	0.387468	0.46	0.243	8.68634e-54	ILC3_c1	Yes
CSDE1	1.331e-44	0.386158	0.718	0.521	1.53531e-40	ILC3_c1
SNRK	1.66987e-54	0.382882	0.479	0.263	1.92619e-50	ILC3_c1
ZFP36L1	2.12376e-30	0.382208	0.973	0.767	2.44975e-26	ILC3_c1
PHACTR2	1.46264e-130	0.37749	0.556	0.215	1.68716e-126	ILC3_c1
SBNO1	2.35241e-65	0.374401	0.489	0.255	2.71351e-61	ILC3_c1
SVIL	5.42301e-194	0.373933	0.658	0.227	6.25544e-190	ILC3_c1
RNF139	8.64404e-27	0.372363	0.292	0.169	9.9709e-23	ILC3_c1
TBL1XR1	7.13729e-133	0.370784	0.61	0.255	8.23287e-129	ILC3_c1
SATB1	2.46573e-57	0.369498	0.665	0.411	2.84422e-53	ILC3_c1	Yes
TUG1	8.5344e-104	0.366077	0.491	0.193	9.84443e-100	ILC3_c1
NFIL3	1.17399e-65	0.366018	0.247	0.083	1.35419e-61	ILC3_c1	Yes
SCRN1	5.40495e-87	0.365588	0.337	0.118	6.23461e-83	ILC3_c1
KLF11	1.57544e-134	0.361789	0.329	0.078	1.81727e-130	ILC3_c1	Yes
CPNE7	5.95984e-299	0.360837	0.534	0.094	6.87467e-295	ILC3_c1
TMED8	7.51591e-146	0.360753	0.35	0.083	8.6696e-142	ILC3_c1
SSH1	1.65682e-170	0.358208	0.522	0.156	1.91114e-166	ILC3_c1
ITM2C	4.47044e-128	0.357133	0.621	0.251	5.15666e-124	ILC3_c1
SPTLC2	2.10421e-70	0.355167	0.387	0.17	2.42721e-66	ILC3_c1
ZNF217	1.86662e-140	0.350758	0.479	0.158	2.15315e-136	ILC3_c1	Yes
TLN1	1.78729e-75	0.350162	0.842	0.527	2.06164e-71	ILC3_c1
MAP3K7	4.64329e-82	0.349513	0.407	0.169	5.35603e-78	ILC3_c1
NFE2L2	2.71842e-48	0.349172	0.582	0.363	3.1357e-44	ILC3_c1	Yes
ARHGEF12	4.60031e-122	0.348179	0.381	0.114	5.30646e-118	ILC3_c1
KRT86	6.08073e-230	0.347603	0.687	0.196	7.01412e-226	ILC3_c1
IFI44	6.63392e-88	0.347356	0.388	0.147	7.65222e-84	ILC3_c1
CHD7	5.69957e-74	0.34306	0.441	0.196	6.57446e-70	ILC3_c1
UTRN	8.72054e-55	0.342971	0.732	0.476	1.00591e-50	ILC3_c1
NRP1	4.76718e-109	0.342701	0.251	0.056	5.49894e-105	ILC3_c1
ZFYVE9	4.31217e-120	0.340714	0.214	0.034	4.97408e-116	ILC3_c1
COL4A4	1.53744e-185	0.340237	0.347	0.063	1.77344e-181	ILC3_c1
MAN1A1	5.43776e-168	0.338645	0.424	0.105	6.27246e-164	ILC3_c1
ABCA1	2.66762e-165	0.338087	0.407	0.102	3.0771e-161	ILC3_c1
JMJD1C	7.83275e-50	0.337661	0.702	0.441	9.03507e-46	ILC3_c1
CTR9	2.98371e-35	0.336386	0.453	0.281	3.44171e-31	ILC3_c1
MYO9A	1.05312e-83	0.334081	0.388	0.152	1.21478e-79	ILC3_c1
RBM5	1.43064e-68	0.333683	0.597	0.334	1.65024e-64	ILC3_c1
MAP2K6	2.10467e-112	0.332422	0.302	0.077	2.42774e-108	ILC3_c1
HDAC9	1.31825e-210	0.330066	0.485	0.111	1.5206e-206	ILC3_c1
DDX17	2.34167e-62	0.329461	0.865	0.602	2.70112e-58	ILC3_c1
GBP4	1.22705e-90	0.328914	0.412	0.157	1.4154e-86	ILC3_c1
TSPAN3	2.44183e-58	0.32624	0.311	0.134	2.81665e-54	ILC3_c1
NFKBID	1.21648e-119	0.325795	0.544	0.214	1.40321e-115	ILC3_c1
CHD9	1.32547e-59	0.325611	0.492	0.262	1.52893e-55	ILC3_c1
PAPSS1	1.96311e-56	0.324808	0.255	0.097	2.26445e-52	ILC3_c1
GDE1	9.81272e-59	0.324515	0.399	0.187	1.1319e-54	ILC3_c1
CHKA	7.55012e-150	0.322472	0.534	0.174	8.70907e-146	ILC3_c1
ANKRD10	4.60821e-56	0.321509	0.649	0.398	5.31557e-52	ILC3_c1
CXorf21	2.27638e-62	0.319405	0.14	0.029	2.62581e-58	ILC3_c1
RIPK2	9.44434e-66	0.319283	0.351	0.148	1.0894e-61	ILC3_c1
PTPN13	1.6186e-117	0.317134	0.252	0.05	1.86705e-113	ILC3_c1
MYO5A	1.04204e-103	0.317104	0.405	0.144	1.202e-99	ILC3_c1
KLHL5	3.9989e-152	0.31412	0.402	0.103	4.61273e-148	ILC3_c1
NOL4L	7.87053e-75	0.313199	0.535	0.268	9.07865e-71	ILC3_c1
PLCG2	2.61338e-131	0.312645	0.554	0.21	3.01453e-127	ILC3_c1
MPRIP	5.96051e-121	0.311734	0.528	0.209	6.87544e-117	ILC3_c1
ITPR1	1.01543e-123	0.310874	0.527	0.197	1.1713e-119	ILC3_c1
SORCS1	9.12692e-135	0.310416	0.188	0.02	1.05279e-130	ILC3_c1
CD96	3.25499e-45	0.308492	0.79	0.569	3.75463e-41	ILC3_c1
ZNF302	4.77875e-31	0.307182	0.388	0.236	5.51229e-27	ILC3_c1	Yes
DDX3Y	9.81836e-29	0.305633	0.582	0.407	1.13255e-24	ILC3_c1
NCR2	1.44943e-132	0.304488	0.317	0.073	1.67192e-128	ILC3_c1
AFAP1L1	3.5882e-149	0.304297	0.243	0.034	4.13899e-145	ILC3_c1
BAZ2B	1.23759e-64	0.301503	0.577	0.324	1.42756e-60	ILC3_c1	Yes
ATP10A	7.13467e-148	0.300951	0.426	0.116	8.22984e-144	ILC3_c1
BIRC6	1.19304e-57	0.300676	0.618	0.368	1.37617e-53	ILC3_c1
BRD8	1.87502e-73	0.300429	0.692	0.462	2.16284e-69	ILC3_c1
BLVRA	2.48511e-150	0.300111	0.363	0.085	2.86658e-146	ILC3_c1
CD81	1.12177e-84	0.29963	0.564	0.254	1.29396e-80	ILC3_c1
RPA1	2.42734e-44	0.299378	0.353	0.183	2.79994e-40	ILC3_c1
SKAP2	1.59005e-87	0.299151	0.499	0.217	1.83412e-83	ILC3_c1
CD44	5.26752e-35	0.298566	0.908	0.759	6.07609e-31	ILC3_c1
ICAM1	5.81729e-57	0.296767	0.379	0.176	6.71024e-53	ILC3_c1
HIPK2	4.18812e-80	0.296473	0.55	0.262	4.831e-76	ILC3_c1
HNRNPH2	5.27231e-35	0.296189	0.334	0.191	6.08161e-31	ILC3_c1
SETX	4.00742e-43	0.294919	0.545	0.334	4.62256e-39	ILC3_c1
RNF144B	7.47141e-86	0.29069	0.193	0.04	8.61827e-82	ILC3_c1
PLPP1	2.27724e-72	0.289745	0.287	0.097	2.62679e-68	ILC3_c1
RNF152	1.33969e-186	0.287669	0.311	0.047	1.54533e-182	ILC3_c1
MYCBP2	7.41665e-65	0.284811	0.701	0.419	8.55511e-61	ILC3_c1
MPV17L	1.16378e-93	0.283633	0.302	0.087	1.34242e-89	ILC3_c1
GS	3.37025e-31	0.283507	0.855	0.65	3.88758e-27	ILC3_c1
HSD17B4	6.44961e-62	0.282596	0.264	0.098	7.43962e-58	ILC3_c1
GBP5	1.02071e-56	0.281345	0.438	0.217	1.17739e-52	ILC3_c1
ELK3	1.54797e-131	0.280395	0.508	0.185	1.78559e-127	ILC3_c1	Yes
ZNF331	7.98043e-52	0.28017	0.706	0.45	9.20543e-48	ILC3_c1	Yes
MDFIC	1.11115e-99	0.280011	0.555	0.237	1.28171e-95	ILC3_c1
PNP	1.5087e-54	0.279121	0.464	0.238	1.74029e-50	ILC3_c1
HELZ	1.22901e-69	0.279051	0.673	0.375	1.41767e-65	ILC3_c1
ATP1A1	1.25535e-38	0.278976	0.616	0.406	1.44804e-34	ILC3_c1
MCL1	5.33906e-17	0.27758	0.863	0.752	6.15861e-13	ILC3_c1
CBL	8.32502e-90	0.277274	0.423	0.164	9.60291e-86	ILC3_c1
TYK2	2.95104e-83	0.276713	0.457	0.195	3.40402e-79	ILC3_c1
CD2AP	4.59228e-85	0.276244	0.428	0.174	5.29719e-81	ILC3_c1
IRF2BP2	6.94488e-87	0.276177	0.732	0.393	8.01092e-83	ILC3_c1
HECTD1	1.64036e-46	0.274022	0.463	0.253	1.89215e-42	ILC3_c1
PUM2	1.25082e-52	0.272566	0.544	0.317	1.44283e-48	ILC3_c1
ABCA5	1.21425e-149	0.270813	0.447	0.128	1.40064e-145	ILC3_c1
TGOLN2	1.13628e-59	0.269862	0.636	0.363	1.31069e-55	ILC3_c1
RUNX2	3.70208e-57	0.268294	0.568	0.321	4.27035e-53	ILC3_c1	Yes
PATJ	2.15323e-49	0.267514	0.349	0.169	2.48376e-45	ILC3_c1
PGM2L1	1.70651e-74	0.26744	0.284	0.095	1.96846e-70	ILC3_c1
ZMIZ1	1.56375e-98	0.266593	0.478	0.191	1.80379e-94	ILC3_c1
HIPK1	6.25055e-67	0.266369	0.646	0.361	7.21001e-63	ILC3_c1
NFKBIA	4.8761e-65	0.264622	0.98	0.872	5.62458e-61	ILC3_c1
ARHGAP10	4.7469e-197	0.264498	0.568	0.158	5.47555e-193	ILC3_c1
BRD1	3.4643e-120	0.263764	0.528	0.195	3.99607e-116	ILC3_c1
CBX5	7.61827e-71	0.263067	0.384	0.163	8.78768e-67	ILC3_c1
DOCK10	1.38654e-66	0.260918	0.662	0.374	1.59937e-62	ILC3_c1
HLA-DQB1	1.00278e-93	0.260661	0.379	0.139	1.15671e-89	ILC3_c1
IL18R1	2.0372e-65	0.260629	0.611	0.336	2.34991e-61	ILC3_c1		IL18R1
EGR2	5.43683e-10	0.260245	0.099	0.055	6.27138e-06	ILC3_c1	Yes
B3GNT7	1.40017e-161	0.259656	0.502	0.148	1.61509e-157	ILC3_c1
DMTF1	1.15388e-56	0.258569	0.491	0.26	1.331e-52	ILC3_c1	Yes
PRKDC	2.15002e-67	0.25827	0.54	0.282	2.48004e-63	ILC3_c1
RAB37	1.00174e-62	0.255365	0.441	0.217	1.15551e-58	ILC3_c1
GRAMD1B	8.80214e-130	0.255086	0.427	0.126	1.01533e-125	ILC3_c1
DOCK5	2.38396e-106	0.254729	0.526	0.212	2.7499e-102	ILC3_c1
RCAN1	1.82755e-61	0.251986	0.101	0.014	2.10808e-57	ILC3_c1
MAN2A2	4.21423e-98	0.250352	0.398	0.138	4.86111e-94	ILC3_c1
KDM4C	2.48978e-69	0.25032	0.458	0.216	2.87196e-65	ILC3_c1

## Sheet: ILC3_c2
gene	p_val	avg_log2FC	pct.1	pct.2	p_val_adj	cluster	Is_TF	KEGG_CYTOKINE_CYTOKINE_RECEPTOR_INTERACTION	CYTOKINE
HSPA6	5.1935e-60	2.24964	0.38	0.163	5.9907e-56	ILC3_c2
DJB1	9.17216e-143	2.16403	0.819	0.534	1.05801e-138	ILC3_c2
HSPA1B	5.45454e-114	2.13149	0.723	0.37	6.29182e-110	ILC3_c2
HSPH1	1.12902e-76	1.8474	0.779	0.486	1.30232e-72	ILC3_c2
MTRNR2L1	1.49665e-53	1.73542	0.604	0.557	1.72638e-49	ILC3_c2
BAG3	2.50801e-46	1.58915	0.234	0.084	2.89299e-42	ILC3_c2
HSPA1A	2.91202e-76	1.47074	0.806	0.492	3.35902e-72	ILC3_c2
NR4A1	4.677e-85	1.33877	0.684	0.371	5.39492e-81	ILC3_c2	Yes
SERPINH1	4.30635e-21	1.32819	0.186	0.09	4.96737e-17	ILC3_c2
HSPD1	3.38023e-23	1.26796	0.763	0.597	3.8991e-19	ILC3_c2
DJA1	1.07966e-85	1.21391	0.799	0.602	1.24539e-81	ILC3_c2
HSP90AA1	6.38773e-97	1.10843	0.958	0.894	7.36824e-93	ILC3_c2
CD83	9.081e-25	0.989405	0.42	0.262	1.04749e-20	ILC3_c2
RGS2	3.33142e-46	0.97248	0.463	0.249	3.84279e-42	ILC3_c2
GADD45B	1.97369e-50	0.949262	0.746	0.486	2.27666e-46	ILC3_c2
CXCR4	1.22003e-17	0.9375	0.792	0.804	1.4073e-13	ILC3_c2		CXCR4
PPP1R15A	1.91154e-56	0.934716	0.834	0.69	2.20496e-52	ILC3_c2
PLIN2	1.0636e-16	0.925416	0.414	0.287	1.22686e-12	ILC3_c2
HSPA8	5.48534e-41	0.919693	0.892	0.868	6.32734e-37	ILC3_c2
NFKBIA	1.85009e-42	0.888229	0.93	0.89	2.13408e-38	ILC3_c2
TSC22D3	3.70169e-25	0.881615	0.88	0.903	4.2699e-21	ILC3_c2
RGS1	2.90498e-20	0.880788	0.713	0.621	3.3509e-16	ILC3_c2
TOB1	9.4546e-25	0.852363	0.362	0.224	1.09059e-20	ILC3_c2
HSPE1	6.24802e-18	0.840881	0.666	0.525	7.20709e-14	ILC3_c2
DJB4	9.86897e-56	0.838558	0.309	0.117	1.13839e-51	ILC3_c2
GLUL	4.27422e-28	0.825044	0.429	0.271	4.93032e-24	ILC3_c2
HSP90AB1	6.48186e-54	0.819764	0.934	0.876	7.47683e-50	ILC3_c2
IFRD1	1.32599e-27	0.802001	0.668	0.498	1.52953e-23	ILC3_c2
DJB6	1.94796e-21	0.789763	0.67	0.506	2.24697e-17	ILC3_c2
ZFAND2A	5.13481e-33	0.749148	0.339	0.177	5.923e-29	ILC3_c2
SAT1	6.88479e-14	0.736973	0.603	0.521	7.9416e-10	ILC3_c2
CDKN1A	4.71639e-60	0.692171	0.528	0.27	5.44036e-56	ILC3_c2
AREG	5.88464e-23	0.681883	0.728	0.595	6.78794e-19	ILC3_c2
FKBP5	5.08928e-28	0.675736	0.62	0.474	5.87048e-24	ILC3_c2
NFKBID	6.90135e-42	0.663828	0.462	0.257	7.96071e-38	ILC3_c2
DUSP2	7.59271e-33	0.656424	0.68	0.504	8.75819e-29	ILC3_c2
NEU1	5.19157e-25	0.656124	0.372	0.229	5.98847e-21	ILC3_c2
TSPYL2	1.71617e-11	0.640341	0.685	0.573	1.9796e-07	ILC3_c2
CD55	2.12231e-15	0.635729	0.528	0.415	2.44809e-11	ILC3_c2
SLAMF1	1.04573e-09	0.621563	0.331	0.248	1.20625e-05	ILC3_c2
PTP4A1	6.69929e-17	0.61297	0.34	0.233	7.72763e-13	ILC3_c2
ICAM1	4.90088e-24	0.591715	0.339	0.201	5.65316e-20	ILC3_c2
CHORDC1	4.56962e-13	0.591524	0.369	0.261	5.27106e-09	ILC3_c2
IL17RB	2.82116e-10	0.57623	0.144	0.083	3.25421e-06	ILC3_c2		IL17RB
CLK1	2.18887e-20	0.550225	0.761	0.672	2.52486e-16	ILC3_c2
NFKBIZ	1.36249e-26	0.538562	0.781	0.633	1.57164e-22	ILC3_c2
DDX3X	3.36457e-09	0.533878	0.735	0.708	3.88103e-05	ILC3_c2
RGS16	5.12444e-35	0.529397	0.202	0.077	5.91104e-31	ILC3_c2
FOSL2	1.53975e-19	0.524987	0.562	0.428	1.7761e-15	ILC3_c2	Yes
BTG2	4.42291e-19	0.521886	0.717	0.6	5.10183e-15	ILC3_c2
CCNH	7.8367e-14	0.510746	0.518	0.415	9.03963e-10	ILC3_c2
GLA	2.00041e-11	0.492202	0.199	0.122	2.30747e-07	ILC3_c2
LM	1.1436e-33	0.475955	0.633	0.411	1.31915e-29	ILC3_c2
DJA4	3.8301e-19	0.460684	0.173	0.083	4.41802e-15	ILC3_c2
ELL2	2.43638e-26	0.457995	0.547	0.372	2.81037e-22	ILC3_c2
TCP1	4.63107e-15	0.449184	0.513	0.403	5.34194e-11	ILC3_c2
ZC3H12A	4.35063e-27	0.445945	0.48	0.314	5.01845e-23	ILC3_c2
DUSP1	4.98385e-27	0.442852	0.885	0.86	5.74888e-23	ILC3_c2
IVNS1ABP	8.85473e-07	0.435361	0.583	0.551	0.0102139	ILC3_c2
CSF1	2.81793e-09	0.431225	0.133	0.077	3.25048e-05	ILC3_c2		CSF1
SAMSN1	3.7903e-09	0.426464	0.444	0.362	4.37211e-05	ILC3_c2
CACYBP	2.84792e-13	0.425332	0.466	0.349	3.28508e-09	ILC3_c2
RUNX2	3.35628e-19	0.419011	0.492	0.356	3.87147e-15	ILC3_c2	Yes
IDI1	6.52968e-14	0.41441	0.4	0.283	7.53199e-10	ILC3_c2
SLC38A2	1.49125e-10	0.403543	0.549	0.43	1.72016e-06	ILC3_c2
AHSA1	8.72081e-20	0.396573	0.454	0.32	1.00595e-15	ILC3_c2
EIF5	7.40137e-09	0.394203	0.665	0.622	8.53748e-05	ILC3_c2
ANKRD28	2.29692e-18	0.392529	0.536	0.404	2.6495e-14	ILC3_c2
RGCC	1.92536e-22	0.386358	0.585	0.399	2.22091e-18	ILC3_c2
ZBTB16	3.91867e-09	0.382448	0.501	0.414	4.52019e-05	ILC3_c2	Yes
ZFAND5	2.16109e-06	0.380595	0.614	0.569	0.0249282	ILC3_c2
ZC3HAV1	2.54427e-06	0.376655	0.648	0.598	0.0293481	ILC3_c2
GPBP1	1.80197e-07	0.376327	0.614	0.566	0.00207857	ILC3_c2	Yes
SLC2A3	1.7094e-07	0.374093	0.622	0.562	0.00197179	ILC3_c2
DDX5	8.24382e-09	0.373477	0.902	0.909	9.50925e-05	ILC3_c2
LDLR	4.6718e-12	0.36667	0.14	0.073	5.38892e-08	ILC3_c2
SMARCA2	4.95328e-12	0.366625	0.543	0.446	5.7136e-08	ILC3_c2
EIF4A2	2.42592e-07	0.357603	0.677	0.636	0.00279829	ILC3_c2
ABHD3	6.65471e-07	0.35384	0.244	0.185	0.0076762	ILC3_c2
SEMA4A	7.30858e-55	0.351226	0.132	0.025	8.43045e-51	ILC3_c2
RASGEF1B	3.59809e-16	0.350084	0.4	0.282	4.1504e-12	ILC3_c2
RASD1	2.90646e-26	0.348369	0.153	0.057	3.35261e-22	ILC3_c2
SRSF7	4.31197e-10	0.345282	0.752	0.741	4.97386e-06	ILC3_c2
DEDD2	1.56649e-23	0.343539	0.322	0.191	1.80694e-19	ILC3_c2
IER5	3.39433e-29	0.3428	0.398	0.228	3.91535e-25	ILC3_c2
EIF1	2.98135e-17	0.342468	0.937	0.952	3.43898e-13	ILC3_c2
PTGS2	9.24869e-13	0.328275	0.244	0.151	1.06684e-08	ILC3_c2
DENND4A	6.70846e-11	0.326872	0.503	0.403	7.73821e-07	ILC3_c2
CXCL2	6.87893e-23	0.323185	0.147	0.058	7.93485e-19	ILC3_c2		CXCL2
MXD1	1.94763e-08	0.322791	0.215	0.145	0.000224659	ILC3_c2	Yes
IFNGR1	1.64016e-06	0.320285	0.488	0.412	0.0189193	ILC3_c2		IFNGR1
EIF4A3	3.19905e-09	0.313039	0.442	0.361	3.69011e-05	ILC3_c2
RHOH	1.55607e-07	0.311519	0.479	0.401	0.00179493	ILC3_c2
TNFAIP3	3.36117e-15	0.310795	0.931	0.886	3.87711e-11	ILC3_c2
BRD2	2.32691e-07	0.310704	0.632	0.584	0.00268409	ILC3_c2
TUBB4B	7.29502e-16	0.306051	0.463	0.337	8.4148e-12	ILC3_c2
PTGER4	3.21453e-07	0.298714	0.61	0.539	0.00370796	ILC3_c2
RSRP1	1.61635e-10	0.292107	0.692	0.624	1.86446e-06	ILC3_c2
PMAIP1	9.73189e-09	0.292048	0.261	0.182	0.000112257	ILC3_c2
CSRNP1	1.976e-09	0.2884	0.594	0.507	2.27932e-05	ILC3_c2	Yes
ANKRD37	2.19475e-31	0.285012	0.25	0.113	2.53165e-27	ILC3_c2
PLEKHG2	4.10922e-37	0.2837	0.171	0.056	4.73999e-33	ILC3_c2
AHK	6.76385e-09	0.283514	0.661	0.568	7.80211e-05	ILC3_c2
ID3	1.56383e-06	0.277431	0.09	0.051	0.0180388	ILC3_c2
HECA	3.8829e-13	0.277264	0.372	0.268	4.47892e-09	ILC3_c2
PELI1	6.00503e-15	0.276297	0.222	0.125	6.92681e-11	ILC3_c2
PRDM1	1.15087e-12	0.271576	0.283	0.181	1.32753e-08	ILC3_c2	Yes
GABPB1	1.30113e-09	0.269531	0.202	0.13	1.50086e-05	ILC3_c2
KLF10	4.67297e-09	0.26744	0.227	0.155	5.39027e-05	ILC3_c2	Yes
DOCK5	1.8662e-13	0.262139	0.372	0.265	2.15266e-09	ILC3_c2
DUSP10	1.64925e-10	0.260061	0.306	0.218	1.90241e-06	ILC3_c2
SERPINE1	2.13198e-16	0.255606	0.092	0.034	2.45924e-12	ILC3_c2
LDLRAD3	5.46386e-11	0.253454	0.202	0.125	6.30257e-07	ILC3_c2

## Sheet: ILC3_c3
gene	p_val	avg_log2FC	pct.1	pct.2	p_val_adj	cluster	Is_TF	KEGG_CYTOKINE_CYTOKINE_RECEPTOR_INTERACTION	CYTOKINE
LTB	1.36886e-125	1.80696	0.939	0.641	1.57898e-121	ILC3_c3		LTB
TNFSF13B	2.1734e-179	1.48123	0.696	0.21	2.50701e-175	ILC3_c3		TNFSF13B	TNFSF13B
CD74	2.55537e-83	1.34983	0.946	0.734	2.94762e-79	ILC3_c3
OTUD5	1.55802e-76	1.18356	0.597	0.265	1.79717e-72	ILC3_c3
LST1	3.49069e-129	1.15167	0.782	0.372	4.02651e-125	ILC3_c3
PCDH9	6.70932e-105	1.10935	0.655	0.24	7.7392e-101	ILC3_c3
EGR1	2.25088e-13	1.09872	0.399	0.251	2.59638e-09	ILC3_c3	Yes
ZFP36L1	1.01446e-87	1.09655	0.964	0.797	1.17018e-83	ILC3_c3
ALDOC	2.96985e-37	1.09273	0.462	0.231	3.42572e-33	ILC3_c3
CD52	9.19085e-89	1.07688	0.886	0.652	1.06016e-84	ILC3_c3
CD2	7.0403e-78	1.05722	0.738	0.388	8.12099e-74	ILC3_c3
MT-ATP8	1.62567e-75	1.03595	0.843	0.667	1.87522e-71	ILC3_c3
RBPJ	3.14778e-44	0.984474	0.696	0.421	3.63096e-40	ILC3_c3	Yes
KRT86	3.83721e-93	0.940745	0.634	0.271	4.42622e-89	ILC3_c3
B2M	2.38989e-75	0.938836	0.998	0.993	2.75674e-71	ILC3_c3
VWA5A	2.10643e-123	0.927467	0.581	0.173	2.42977e-119	ILC3_c3
CAT	6.04041e-81	0.911248	0.698	0.323	6.96761e-77	ILC3_c3
IL4I1	4.47635e-60	0.90442	0.64	0.333	5.16347e-56	ILC3_c3
IL23R	8.65996e-91	0.867119	0.622	0.241	9.98927e-87	ILC3_c3		IL23R
GOLGA8A	4.87213e-14	0.843311	0.546	0.412	5.62001e-10	ILC3_c3
TNFRSF25	7.01231e-64	0.841553	0.729	0.42	8.0887e-60	ILC3_c3		TNFRSF25
MT-ND1	7.52503e-14	0.830623	0.936	0.886	8.68013e-10	ILC3_c3
TCF7	6.74526e-51	0.823019	0.767	0.477	7.78066e-47	ILC3_c3	Yes
TRAC	1.31899e-67	0.816457	0.667	0.36	1.52146e-63	ILC3_c3
GSN	1.67467e-90	0.801846	0.675	0.278	1.93174e-86	ILC3_c3
DUSP1	6.94594e-22	0.793724	0.957	0.854	8.01214e-18	ILC3_c3
MT-ND3	4.96415e-28	0.779494	0.964	0.934	5.72614e-24	ILC3_c3
KIAA1324	2.99732e-94	0.779404	0.576	0.201	3.45741e-90	ILC3_c3
CD81	3.93331e-26	0.767328	0.485	0.305	4.53707e-22	ILC3_c3
NSMCE1	2.81182e-59	0.759556	0.546	0.259	3.24344e-55	ILC3_c3
MT-ATP6	1.74146e-16	0.759107	0.983	0.968	2.00877e-12	ILC3_c3
TRBC1	3.78747e-51	0.749309	0.883	0.627	4.36885e-47	ILC3_c3
RPS20	3.71718e-21	0.739683	0.881	0.781	4.28777e-17	ILC3_c3
HNRNPH1	9.26528e-34	0.734987	0.832	0.728	1.06875e-29	ILC3_c3
ITM2B	2.54503e-33	0.728067	0.911	0.756	2.93569e-29	ILC3_c3
CFL1	4.67626e-67	0.725687	0.942	0.793	5.39407e-63	ILC3_c3
RPL23	4.93623e-35	0.725544	0.888	0.758	5.69394e-31	ILC3_c3
MT-ND4	2.72272e-32	0.723747	0.97	0.958	3.14066e-28	ILC3_c3
GIMAP6	5.86698e-61	0.717513	0.533	0.233	6.76756e-57	ILC3_c3
LTA4H	1.38515e-72	0.711862	0.678	0.302	1.59776e-68	ILC3_c3
FCER1G	6.08665e-55	0.674007	0.685	0.383	7.02095e-51	ILC3_c3
RPL31	4.0199e-48	0.665364	0.96	0.806	4.63696e-44	ILC3_c3
PPP3CA	3.99685e-46	0.657375	0.683	0.465	4.61037e-42	ILC3_c3
H2AFY	1.0003e-35	0.657068	0.627	0.396	1.15384e-31	ILC3_c3
C6orf62	8.44285e-23	0.652151	0.637	0.448	9.73883e-19	ILC3_c3
RPS29	9.82502e-28	0.645289	0.937	0.862	1.13332e-23	ILC3_c3
PIM2	4.14814e-31	0.638282	0.771	0.548	4.78487e-27	ILC3_c3
PRR5	1.49097e-48	0.629907	0.49	0.247	1.71983e-44	ILC3_c3
JUND	2.30904e-28	0.628566	0.863	0.73	2.66347e-24	ILC3_c3	Yes
CD164	3.6777e-32	0.614317	0.754	0.524	4.24223e-28	ILC3_c3
SH2D1B	4.78474e-62	0.609446	0.533	0.217	5.5192e-58	ILC3_c3
DAZAP2	8.49567e-17	0.607769	0.781	0.644	9.79975e-13	ILC3_c3
ACTB	1.20356e-38	0.607449	0.995	0.938	1.3883e-34	ILC3_c3
SCML4	3.58016e-34	0.607416	0.653	0.413	4.12971e-30	ILC3_c3	Yes
RPS11	1.00052e-24	0.60672	0.949	0.796	1.1541e-20	ILC3_c3
MPV17L	5.5135e-40	0.603843	0.299	0.118	6.35982e-36	ILC3_c3
TLE1	1.15801e-25	0.602145	0.569	0.368	1.33577e-21	ILC3_c3
ARL6IP5	5.61262e-19	0.593786	0.662	0.482	6.47416e-15	ILC3_c3
IL7R	3.30614e-37	0.588265	0.997	0.821	3.81363e-33	ILC3_c3		IL7R
PIK3IP1	1.11111e-29	0.587615	0.726	0.478	1.28167e-25	ILC3_c3
CD300LF	4.62034e-87	0.576447	0.388	0.108	5.32957e-83	ILC3_c3
PFN1	1.24514e-61	0.569525	0.957	0.819	1.43627e-57	ILC3_c3
RPLP1	9.27086e-22	0.568872	0.992	0.962	1.06939e-17	ILC3_c3
TYROBP	7.42706e-62	0.561027	0.795	0.488	8.56711e-58	ILC3_c3
TMSB4X	1.95727e-67	0.559062	0.993	0.915	2.25772e-63	ILC3_c3
NELL2	2.03996e-38	0.555636	0.211	0.063	2.35309e-34	ILC3_c3
TXK	7.7148e-38	0.552146	0.691	0.421	8.89902e-34	ILC3_c3
TNFRSF18	6.12368e-36	0.545998	0.66	0.448	7.06367e-32	ILC3_c3		TNFRSF18
ADAM10	2.57492e-34	0.542345	0.667	0.406	2.97018e-30	ILC3_c3
IL1R1	5.31227e-40	0.537914	0.554	0.281	6.12771e-36	ILC3_c3		IL1R1
FXYD5	3.06839e-25	0.536359	0.845	0.748	3.53939e-21	ILC3_c3
TMIGD2	1.09181e-52	0.536111	0.591	0.313	1.2594e-48	ILC3_c3
NCR2	1.96439e-110	0.529089	0.411	0.098	2.26593e-106	ILC3_c3
ANP32E	1.04173e-20	0.527196	0.573	0.389	1.20163e-16	ILC3_c3
LSP1	1.58405e-21	0.521723	0.728	0.603	1.8272e-17	ILC3_c3
CIRBP	4.58441e-30	0.516185	0.822	0.655	5.28811e-26	ILC3_c3
PRKAR1A	6.17756e-17	0.507122	0.574	0.408	7.12581e-13	ILC3_c3
STARD3NL	5.5465e-14	0.504025	0.375	0.248	6.39789e-10	ILC3_c3
RPL27A	6.80887e-25	0.499209	0.913	0.782	7.85403e-21	ILC3_c3
SKAP2	3.89257e-35	0.498149	0.495	0.257	4.49008e-31	ILC3_c3
TGM2	1.68093e-31	0.497716	0.287	0.12	1.93896e-27	ILC3_c3
CHD7	3.32799e-14	0.49363	0.37	0.238	3.83884e-10	ILC3_c3
RPS10	8.24404e-26	0.490872	0.685	0.488	9.5095e-22	ILC3_c3
KRT81	9.38529e-73	0.487982	0.457	0.166	1.08259e-68	ILC3_c3
PHACTR2	1.92183e-27	0.486736	0.475	0.271	2.21683e-23	ILC3_c3
ZNF302	1.18862e-18	0.486552	0.417	0.254	1.37108e-14	ILC3_c3	Yes
DHRS3	1.06262e-31	0.485043	0.54	0.297	1.22573e-27	ILC3_c3
MT-ND5	1.03685e-23	0.482832	0.957	0.914	1.19601e-19	ILC3_c3
APC16	2.54257e-23	0.479859	0.647	0.454	2.93285e-19	ILC3_c3
GS	3.63359e-07	0.474241	0.772	0.688	0.00419134	ILC3_c3
SLC4A10	5.60511e-55	0.474001	0.459	0.188	6.46549e-51	ILC3_c3
GOLGA8B	1.0858e-10	0.464201	0.629	0.508	1.25247e-06	ILC3_c3
TMBIM6	2.51982e-15	0.462863	0.863	0.693	2.90661e-11	ILC3_c3
BCL6	1.70531e-09	0.462265	0.284	0.186	1.96708e-05	ILC3_c3	Yes
ANKRD10	1.56767e-24	0.458365	0.642	0.434	1.80831e-20	ILC3_c3
PEBP1	1.90792e-18	0.455172	0.601	0.464	2.20079e-14	ILC3_c3
TAPBP	2.96594e-20	0.454758	0.754	0.63	3.42121e-16	ILC3_c3
LTA	1.14197e-10	0.449011	0.218	0.12	1.31726e-06	ILC3_c3		LTA
CTSA	5.92292e-14	0.44815	0.416	0.291	6.83209e-10	ILC3_c3
MT-CO3	7.55506e-23	0.447982	0.992	0.986	8.71476e-19	ILC3_c3
BST2	8.11345e-26	0.441723	0.622	0.423	9.35887e-22	ILC3_c3
CELF2	7.69504e-08	0.43946	0.774	0.661	0.000887623	ILC3_c3
BIRC3	3.70416e-11	0.439353	0.729	0.575	4.27275e-07	ILC3_c3
MT-CYB	1.77006e-24	0.436675	0.99	0.977	2.04177e-20	ILC3_c3
RPL7	8.25027e-36	0.434103	0.721	0.403	9.51669e-32	ILC3_c3
SLA	1.21402e-19	0.434009	0.744	0.521	1.40037e-15	ILC3_c3
TNFRSF4	1.46108e-24	0.432391	0.477	0.295	1.68535e-20	ILC3_c3		TNFRSF4
PRMT2	1.11666e-26	0.430712	0.632	0.413	1.28807e-22	ILC3_c3
SRSF6	1.34633e-19	0.43031	0.677	0.479	1.553e-15	ILC3_c3
RPS6	2.98448e-15	0.430087	0.979	0.887	3.4426e-11	ILC3_c3
IL2RG	3.30483e-24	0.429432	0.886	0.769	3.81212e-20	ILC3_c3		IL2RG
ARHGEF12	1.76875e-12	0.426558	0.264	0.163	2.04026e-08	ILC3_c3
RPL38	1.34716e-12	0.422139	0.832	0.786	1.55395e-08	ILC3_c3
ATP6V1G1	1.29694e-22	0.420588	0.581	0.398	1.49602e-18	ILC3_c3
TCF4	2.17539e-18	0.420569	0.299	0.166	2.50932e-14	ILC3_c3	Yes
ELOVL6	6.51906e-57	0.417199	0.413	0.149	7.51973e-53	ILC3_c3
SPINK2	1.28504e-36	0.414707	0.421	0.206	1.48229e-32	ILC3_c3
PSAP	9.84119e-15	0.412413	0.678	0.503	1.13518e-10	ILC3_c3
NRP1	5.18392e-57	0.410663	0.285	0.08	5.97966e-53	ILC3_c3
MYL6	6.90394e-22	0.409771	0.896	0.797	7.9637e-18	ILC3_c3
MPG	1.04191e-42	0.4096	0.477	0.248	1.20185e-38	ILC3_c3
KLRB1	2.81518e-27	0.407705	0.947	0.743	3.24731e-23	ILC3_c3
RPL37A	1.98316e-19	0.402272	0.947	0.853	2.28758e-15	ILC3_c3
MAT2B	8.98871e-19	0.401502	0.475	0.298	1.03685e-14	ILC3_c3
ENTPD1	6.19808e-42	0.39599	0.295	0.102	7.14949e-38	ILC3_c3
SPOCK2	5.30715e-08	0.395145	0.688	0.626	0.000612179	ILC3_c3
HNRNPK	1.87997e-21	0.394938	0.815	0.644	2.16854e-17	ILC3_c3
SON	6.0935e-28	0.394728	0.894	0.806	7.02885e-24	ILC3_c3	Yes
GI2	4.15734e-08	0.394363	0.465	0.381	0.00047955	ILC3_c3
RPL27	9.98656e-15	0.394208	0.863	0.772	1.15195e-10	ILC3_c3
RAC2	3.03867e-15	0.393673	0.718	0.612	3.50511e-11	ILC3_c3
RPS6KA3	2.58635e-07	0.393463	0.551	0.453	0.00298336	ILC3_c3
ITM2C	2.98896e-19	0.389318	0.493	0.315	3.44777e-15	ILC3_c3
SMIM3	2.80752e-12	0.388967	0.259	0.154	3.23848e-08	ILC3_c3
HOTAIRM1	7.02344e-15	0.387991	0.249	0.139	8.10153e-11	ILC3_c3
PRKCA	6.24203e-14	0.381923	0.314	0.191	7.20019e-10	ILC3_c3
CMTM6	3.67616e-22	0.381551	0.686	0.499	4.24045e-18	ILC3_c3
SLTM	5.08747e-10	0.380628	0.617	0.486	5.8684e-06	ILC3_c3
SRI	1.37366e-26	0.379958	0.545	0.334	1.58451e-22	ILC3_c3
STAT1	4.89737e-14	0.379916	0.483	0.314	5.64912e-10	ILC3_c3	Yes
HDAC9	1.36212e-30	0.379512	0.361	0.176	1.5712e-26	ILC3_c3
MDFIC	1.2312e-08	0.37866	0.388	0.299	0.000142019	ILC3_c3
TOX	2.50859e-23	0.375747	0.421	0.233	2.89366e-19	ILC3_c3
PPIA	9.49782e-13	0.375726	0.8	0.714	1.09557e-08	ILC3_c3
CXXC5	9.64573e-22	0.375221	0.389	0.222	1.11264e-17	ILC3_c3	Yes
ENPP1	1.16086e-54	0.374611	0.366	0.13	1.33905e-50	ILC3_c3
LPIN1	7.12746e-17	0.374207	0.505	0.337	8.22153e-13	ILC3_c3
TMEM243	3.60773e-17	0.37177	0.446	0.288	4.16152e-13	ILC3_c3
GMFG	7.22401e-18	0.369216	0.644	0.494	8.3329e-14	ILC3_c3
TIMP1	1.32335e-20	0.368689	0.517	0.345	1.52648e-16	ILC3_c3
HLA-E	8.46684e-20	0.368542	0.974	0.917	9.76651e-16	ILC3_c3
DEK	1.50665e-11	0.367362	0.569	0.441	1.73792e-07	ILC3_c3
FURIN	8.35129e-07	0.366469	0.439	0.358	0.00963321	ILC3_c3
RPL15	7.44629e-11	0.365286	0.95	0.841	8.58929e-07	ILC3_c3
ARPC5	1.94111e-18	0.365284	0.533	0.355	2.23907e-14	ILC3_c3
RPS9	1.92493e-08	0.365238	0.805	0.772	0.000222041	ILC3_c3
RPS16	1.95488e-07	0.364832	0.855	0.816	0.00225495	ILC3_c3
RPL23A	9.43883e-15	0.362375	0.944	0.828	1.08877e-10	ILC3_c3
VAMP8	6.47172e-19	0.362118	0.551	0.397	7.46513e-15	ILC3_c3
CAPG	1.01961e-16	0.361904	0.502	0.329	1.17612e-12	ILC3_c3
IRAK3	3.78669e-21	0.358715	0.277	0.137	4.36795e-17	ILC3_c3
ID2	4.79253e-21	0.357363	0.919	0.793	5.52818e-17	ILC3_c3
NCF4	1.2831e-40	0.357138	0.261	0.09	1.48006e-36	ILC3_c3
ECH1	4.60677e-32	0.353257	0.573	0.35	5.31391e-28	ILC3_c3
GBP4	4.72811e-19	0.351057	0.35	0.199	5.45387e-15	ILC3_c3
CD96	6.37592e-24	0.349888	0.848	0.594	7.35463e-20	ILC3_c3
GPR82	3.06492e-48	0.34899	0.244	0.07	3.53538e-44	ILC3_c3
DCAF11	2.78676e-29	0.3476	0.495	0.262	3.21453e-25	ILC3_c3
CLIC1	1.69394e-16	0.347379	0.764	0.6	1.95396e-12	ILC3_c3
ABRACL	6.74508e-18	0.345891	0.477	0.331	7.78045e-14	ILC3_c3
PPP1CA	9.63996e-18	0.345845	0.543	0.376	1.11197e-13	ILC3_c3
ARPC4	5.15416e-25	0.345843	0.609	0.419	5.94533e-21	ILC3_c3
LAT2	1.15145e-12	0.345293	0.413	0.271	1.32819e-08	ILC3_c3
TOR1A	7.09957e-29	0.343974	0.355	0.168	8.18935e-25	ILC3_c3
ENO1	1.02883e-19	0.342897	0.795	0.592	1.18675e-15	ILC3_c3
SRSF3	3.05364e-11	0.34251	0.757	0.63	3.52237e-07	ILC3_c3
ZNF292	8.2873e-08	0.339548	0.528	0.401	0.00095594	ILC3_c3	Yes
TMEM245	6.88629e-20	0.339349	0.34	0.182	7.94334e-16	ILC3_c3
NCOA7	1.1507e-18	0.339338	0.604	0.408	1.32733e-14	ILC3_c3
NDUFB2	1.84145e-16	0.339334	0.525	0.395	2.12411e-12	ILC3_c3
PLPP1	2.43235e-09	0.339032	0.216	0.13	2.80571e-05	ILC3_c3
TRAPPC1	1.32454e-30	0.338914	0.508	0.309	1.52786e-26	ILC3_c3
TRA2A	2.56601e-13	0.338186	0.69	0.609	2.95989e-09	ILC3_c3
PECAM1	5.12227e-39	0.337585	0.398	0.169	5.90854e-35	ILC3_c3
AKT1S1	4.3009e-09	0.337182	0.233	0.153	4.96108e-05	ILC3_c3
SLAMF6	2.67946e-22	0.336756	0.279	0.133	3.09075e-18	ILC3_c3
LPXN	1.34679e-16	0.334481	0.611	0.437	1.55352e-12	ILC3_c3
PHPT1	1.32139e-21	0.332627	0.332	0.181	1.52422e-17	ILC3_c3
TNFSF4	2.15581e-25	0.331938	0.269	0.116	2.48672e-21	ILC3_c3		TNFSF4	TNFSF4
SEC62	7.17609e-14	0.329114	0.54	0.426	8.27763e-10	ILC3_c3
TBCB	2.32969e-17	0.328039	0.413	0.266	2.6873e-13	ILC3_c3
SET	4.82824e-22	0.32777	0.736	0.574	5.56937e-18	ILC3_c3
TMEM156	1.18463e-25	0.32691	0.307	0.145	1.36648e-21	ILC3_c3
HELZ	3.14191e-10	0.326224	0.569	0.427	3.6242e-06	ILC3_c3
SRSF5	1.26445e-09	0.325034	0.871	0.767	1.45854e-05	ILC3_c3
CTSH	5.53538e-24	0.324801	0.355	0.181	6.38506e-20	ILC3_c3
COX6C	2.46552e-13	0.323744	0.571	0.452	2.84398e-09	ILC3_c3
C11orf58	1.78345e-11	0.323399	0.536	0.423	2.05721e-07	ILC3_c3
PPP1R15A	8.40309e-08	0.323095	0.814	0.7	0.000969296	ILC3_c3
CPNE7	5.45864e-25	0.322235	0.338	0.175	6.29655e-21	ILC3_c3
PRPF6	1.70239e-10	0.3214	0.441	0.321	1.9637e-06	ILC3_c3
SLC25A39	3.90987e-16	0.31964	0.449	0.292	4.51004e-12	ILC3_c3
NEO1	1.03964e-13	0.318101	0.243	0.138	1.19923e-09	ILC3_c3
SRP14	3.45478e-20	0.317826	0.739	0.605	3.98508e-16	ILC3_c3
ORAI2	1.06822e-08	0.317357	0.269	0.183	0.000123219	ILC3_c3
TMEM123	2.99261e-16	0.317197	0.776	0.565	3.45198e-12	ILC3_c3
RHOC	2.56065e-21	0.317187	0.452	0.284	2.95371e-17	ILC3_c3
HOXA5	4.84512e-15	0.316573	0.172	0.079	5.58885e-11	ILC3_c3	Yes
ZBTB44	4.31771e-07	0.316367	0.274	0.197	0.00498048	ILC3_c3	Yes
NT5E	2.01842e-28	0.314052	0.15	0.045	2.32825e-24	ILC3_c3
SCYL3	6.71399e-38	0.313337	0.274	0.099	7.74459e-34	ILC3_c3
SPOP	3.17241e-15	0.313323	0.337	0.198	3.65938e-11	ILC3_c3
TBC1D31	7.40533e-27	0.312235	0.358	0.175	8.54205e-23	ILC3_c3
TMED2	1.50771e-13	0.310945	0.561	0.402	1.73914e-09	ILC3_c3
EIF5B	3.66002e-06	0.309986	0.427	0.344	0.0422183	ILC3_c3
MGAT4A	3.47419e-16	0.309016	0.587	0.404	4.00748e-12	ILC3_c3
ABCA1	1.74632e-19	0.308546	0.304	0.155	2.01438e-15	ILC3_c3
ELOB	2.45998e-14	0.308318	0.545	0.452	2.83759e-10	ILC3_c3
RORC	3.1464e-20	0.308068	0.355	0.195	3.62937e-16	ILC3_c3	Yes
HMGN3	7.57364e-28	0.305358	0.55	0.335	8.73619e-24	ILC3_c3	Yes
LIMD2	4.89737e-09	0.304704	0.535	0.45	5.64912e-05	ILC3_c3
ITGB7	8.1342e-08	0.304655	0.411	0.319	0.00093828	ILC3_c3
ELK3	7.96006e-15	0.303544	0.381	0.243	9.18193e-11	ILC3_c3	Yes
C5orf15	8.33941e-20	0.303459	0.304	0.159	9.61951e-16	ILC3_c3
SLC9A3R1	2.05089e-09	0.30318	0.551	0.446	2.3657e-05	ILC3_c3
BIVM	1.04036e-11	0.303153	0.2	0.111	1.20005e-07	ILC3_c3
PSME2	1.85978e-18	0.300083	0.617	0.448	2.14525e-14	ILC3_c3
ISCU	5.45909e-12	0.297302	0.436	0.302	6.29706e-08	ILC3_c3
CERK	4.83128e-12	0.297019	0.457	0.325	5.57288e-08	ILC3_c3
LINC00299	1.11597e-35	0.296831	0.523	0.293	1.28727e-31	ILC3_c3
HNRNPA1	1.97667e-06	0.29675	0.881	0.808	0.0228009	ILC3_c3
PSME1	7.39098e-16	0.295914	0.767	0.626	8.5255e-12	ILC3_c3
AFF3	1.84434e-27	0.295406	0.531	0.309	2.12744e-23	ILC3_c3
S100A11	5.36955e-11	0.2953	0.54	0.437	6.19377e-07	ILC3_c3
UQCRQ	1.36138e-16	0.294807	0.503	0.373	1.57035e-12	ILC3_c3
IFITM2	7.07343e-13	0.294767	0.818	0.71	8.1592e-09	ILC3_c3
ATP6AP2	3.41075e-13	0.294725	0.472	0.318	3.9343e-09	ILC3_c3
OXD1	1.52202e-17	0.294318	0.414	0.253	1.75565e-13	ILC3_c3
CAPNS1	1.9362e-06	0.294072	0.276	0.205	0.022334	ILC3_c3
FYTTD1	1.30989e-12	0.292699	0.398	0.26	1.51096e-08	ILC3_c3
YPEL3	6.94944e-08	0.292681	0.345	0.254	0.000801618	ILC3_c3
ARPC2	3.18812e-11	0.292281	0.866	0.742	3.6775e-07	ILC3_c3
LAIR1	6.72669e-12	0.2914	0.361	0.238	7.75923e-08	ILC3_c3
GRAMD1A	6.5546e-08	0.290163	0.353	0.266	0.000756074	ILC3_c3
ADI1	2.04003e-26	0.288567	0.323	0.156	2.35317e-22	ILC3_c3
TMED8	2.21599e-18	0.285774	0.259	0.13	2.55614e-14	ILC3_c3
RBM26	1.82908e-07	0.284224	0.332	0.242	0.00210985	ILC3_c3
PSMB9	9.12075e-17	0.284126	0.49	0.338	1.05208e-12	ILC3_c3
ADAM28	4.56061e-24	0.284023	0.299	0.141	5.26066e-20	ILC3_c3
MT-CO2	1.86953e-20	0.283359	0.993	0.992	2.1565e-16	ILC3_c3
PCNP	6.98355e-08	0.282503	0.396	0.302	0.000805553	ILC3_c3
ZNF652	2.3699e-11	0.282095	0.342	0.222	2.73368e-07	ILC3_c3	Yes
TRIM56	2.51539e-07	0.28142	0.312	0.228	0.00290151	ILC3_c3
TP53I13	2.2668e-10	0.281306	0.373	0.267	2.61475e-06	ILC3_c3
UGCG	1.1037e-21	0.281239	0.345	0.18	1.27312e-17	ILC3_c3
HMGN1	3.13311e-13	0.280439	0.67	0.537	3.61404e-09	ILC3_c3
NDUFA4	2.80297e-14	0.280062	0.566	0.444	3.23323e-10	ILC3_c3
SEM1	1.33885e-08	0.279128	0.381	0.3	0.000154436	ILC3_c3
LRPAP1	7.46567e-12	0.278257	0.37	0.252	8.61165e-08	ILC3_c3
RPLP2	2.78746e-10	0.277747	0.931	0.891	3.21533e-06	ILC3_c3
IFI44	4.58658e-16	0.277365	0.323	0.187	5.29061e-12	ILC3_c3
RPA1	4.15765e-21	0.276627	0.38	0.204	4.79585e-17	ILC3_c3
APOBEC3C	4.06838e-18	0.276233	0.376	0.221	4.69287e-14	ILC3_c3
PTPN7	4.0944e-15	0.276111	0.564	0.388	4.72289e-11	ILC3_c3
RTKN2	3.22004e-34	0.276076	0.256	0.092	3.71431e-30	ILC3_c3
GBP5	7.25876e-14	0.276034	0.401	0.252	8.37298e-10	ILC3_c3
BROX	2.53595e-15	0.275324	0.3	0.169	2.92522e-11	ILC3_c3
CKLF	1.03674e-19	0.27509	0.502	0.355	1.19587e-15	ILC3_c3
ARHGDIB	1.29934e-12	0.27494	0.927	0.804	1.49879e-08	ILC3_c3
REEP3	2.29366e-19	0.274425	0.391	0.232	2.64574e-15	ILC3_c3
MAN1A1	7.60479e-08	0.27425	0.244	0.168	0.000877212	ILC3_c3
PLSCR1	7.4833e-14	0.273792	0.295	0.177	8.63199e-10	ILC3_c3	Yes
KIAA1211L	1.45831e-25	0.273645	0.175	0.062	1.68216e-21	ILC3_c3
DARS	7.95504e-22	0.273154	0.482	0.287	9.17613e-18	ILC3_c3
PBXIP1	9.46404e-12	0.272677	0.686	0.56	1.09168e-07	ILC3_c3
PNISR	8.59524e-07	0.271874	0.723	0.601	0.00991461	ILC3_c3
UBE2V2	9.0617e-22	0.271019	0.267	0.125	1.04527e-17	ILC3_c3
SIGLEC7	4.54967e-42	0.270205	0.264	0.087	5.24804e-38	ILC3_c3
CHD9	2.37627e-11	0.269131	0.441	0.3	2.74103e-07	ILC3_c3
RAB37	4.81442e-12	0.268614	0.393	0.254	5.55343e-08	ILC3_c3
POLR2L	1.84675e-12	0.26819	0.517	0.425	2.13023e-08	ILC3_c3
PSMB1	1.68716e-11	0.267779	0.548	0.406	1.94614e-07	ILC3_c3
P2RX4	5.07449e-12	0.267737	0.254	0.147	5.85343e-08	ILC3_c3
RPL37	1.94964e-12	0.267606	0.931	0.878	2.24891e-08	ILC3_c3
RPL13	7.79493e-07	0.267294	0.979	0.938	0.00899145	ILC3_c3
CTDNEP1	2.3344e-08	0.267185	0.206	0.131	0.000269273	ILC3_c3
CSNK2A2	8.96847e-28	0.266834	0.261	0.106	1.03451e-23	ILC3_c3
PRDX5	1.05041e-11	0.266693	0.454	0.349	1.21165e-07	ILC3_c3
C4orf3	5.70767e-16	0.266649	0.51	0.358	6.58379e-12	ILC3_c3
LCP2	6.30461e-13	0.266254	0.619	0.468	7.27236e-09	ILC3_c3
VTA1	1.39804e-19	0.265605	0.271	0.13	1.61263e-15	ILC3_c3
DGKA	8.66157e-14	0.2656	0.477	0.322	9.99113e-10	ILC3_c3
PFDN5	5.32894e-12	0.264826	0.764	0.663	6.14694e-08	ILC3_c3
ACTR2	5.21742e-09	0.264632	0.498	0.387	6.01829e-05	ILC3_c3
STAP1	3.51625e-16	0.264021	0.285	0.157	4.056e-12	ILC3_c3
YIPF4	2.17943e-07	0.263835	0.333	0.246	0.00251397	ILC3_c3
UQCR10	1.41373e-11	0.263715	0.393	0.285	1.63074e-07	ILC3_c3
RPL10A	4.01258e-07	0.262107	0.851	0.788	0.00462851	ILC3_c3
POLR2G	5.09698e-15	0.261538	0.355	0.217	5.87936e-11	ILC3_c3
DYNLRB1	1.2432e-06	0.260815	0.285	0.217	0.0143404	ILC3_c3
LARP7	3.81453e-19	0.260785	0.325	0.184	4.40006e-15	ILC3_c3
UBL5	9.50375e-10	0.260162	0.55	0.472	1.09626e-05	ILC3_c3
PPT1	6.75491e-27	0.258501	0.386	0.185	7.79179e-23	ILC3_c3
OCIAD2	8.82273e-10	0.25744	0.325	0.224	1.0177e-05	ILC3_c3
MT-ND4L	1.31719e-12	0.257022	0.957	0.921	1.51937e-08	ILC3_c3
SKIL	4.46573e-12	0.256268	0.5	0.35	5.15122e-08	ILC3_c3	Yes
PTGDR	7.18459e-21	0.255576	0.404	0.23	8.28742e-17	ILC3_c3
SLC43A2	9.31243e-18	0.255401	0.211	0.102	1.07419e-13	ILC3_c3
TSPYL1	4.62634e-11	0.25519	0.559	0.408	5.33648e-07	ILC3_c3
LY9	1.22773e-14	0.254494	0.332	0.198	1.41618e-10	ILC3_c3
BCAS1	3.40433e-26	0.254223	0.257	0.11	3.9269e-22	ILC3_c3
AAK1	7.09446e-08	0.254203	0.624	0.53	0.000818346	ILC3_c3
PIGM	2.74605e-14	0.254011	0.215	0.111	3.16757e-10	ILC3_c3
NDUFA12	4.61822e-12	0.253888	0.363	0.245	5.32711e-08	ILC3_c3
NUP62	6.87545e-09	0.253113	0.287	0.196	7.93083e-05	ILC3_c3
GYG1	1.71063e-19	0.253057	0.363	0.199	1.97322e-15	ILC3_c3
DAD1	2.39466e-10	0.251698	0.47	0.359	2.76224e-06	ILC3_c3
ATP6V0E1	7.88838e-10	0.251422	0.467	0.355	9.09925e-06	ILC3_c3
RBM3	2.72704e-10	0.250768	0.668	0.524	3.14565e-06	ILC3_c3
COX8A	2.17801e-11	0.250487	0.49	0.395	2.51233e-07	ILC3_c3
PREX1	8.50848e-07	0.250437	0.556	0.471	0.00981453	ILC3_c3
CCDC88A	8.45477e-07	0.250234	0.216	0.145	0.00975257	ILC3_c3

## Sheet: ILC3_c4
gene	p_val	avg_log2FC	pct.1	pct.2	p_val_adj	cluster	Is_TF	KEGG_CYTOKINE_CYTOKINE_RECEPTOR_INTERACTION	CYTOKINE
SELL	2.2351e-114	2.74836	0.677	0.224	2.57819e-110	ILC3_c4
GNLY	6.57682e-57	2.66346	0.643	0.314	7.58636e-53	ILC3_c4
KLRD1	5.51647e-61	2.20972	0.536	0.219	6.36325e-57	ILC3_c4
RIPOR2	7.33142e-103	1.5707	0.805	0.364	8.45679e-99	ILC3_c4
ITGAX	2.64161e-189	1.47518	0.664	0.123	3.04709e-185	ILC3_c4
CTSW	6.15707e-83	1.46919	0.893	0.563	7.10218e-79	ILC3_c4
IFITM2	4.9228e-47	1.37042	0.947	0.707	5.67844e-43	ILC3_c4
KLF2	4.07032e-64	1.35086	0.712	0.329	4.69512e-60	ILC3_c4	Yes
TXNIP	1.43441e-64	1.33738	0.971	0.776	1.65459e-60	ILC3_c4
RPL27A	8.69645e-38	1.31767	0.976	0.783	1.00314e-33	ILC3_c4
TYROBP	1.45813e-60	1.25685	0.859	0.496	1.68195e-56	ILC3_c4
MT-ATP8	8.78177e-49	1.25624	0.973	0.666	1.01298e-44	ILC3_c4
MT-ND1	3.31057e-45	1.24739	0.989	0.885	3.81874e-41	ILC3_c4
RPS11	2.03846e-35	1.1774	0.984	0.799	2.35137e-31	ILC3_c4
RPL23	1.01477e-27	1.17228	0.939	0.759	1.17054e-23	ILC3_c4
CMC1	3.16398e-22	1.14275	0.381	0.208	3.64966e-18	ILC3_c4
TCF7	5.61745e-65	1.12509	0.848	0.483	6.47973e-61	ILC3_c4	Yes
IFITM3	2.1982e-49	1.1241	0.688	0.381	2.53562e-45	ILC3_c4
KLRC1	2.17019e-30	1.10761	0.379	0.169	2.50331e-26	ILC3_c4
RPS10	1.3377e-35	1.08641	0.76	0.491	1.54304e-31	ILC3_c4
TPT1	1.54865e-10	1.06794	0.987	0.932	1.78637e-06	ILC3_c4
MT-ND4	1.89272e-52	1.06287	0.997	0.957	2.18325e-48	ILC3_c4
NCAM1	6.96892e-27	1.01941	0.408	0.205	8.03865e-23	ILC3_c4
MT-ATP6	1.5988e-17	1.01502	0.997	0.968	1.84422e-13	ILC3_c4
ADD3	8.47714e-44	1.00766	0.552	0.258	9.77838e-40	ILC3_c4
MT-ND3	2.49443e-08	0.999843	0.987	0.933	0.000287733	ILC3_c4
MT-ND2	4.16255e-41	0.99573	0.992	0.919	4.8015e-37	ILC3_c4
TRDC	5.23428e-35	0.957489	0.621	0.359	6.03774e-31	ILC3_c4
TXK	2.02392e-28	0.940567	0.664	0.432	2.3346e-24	ILC3_c4
RPS29	2.15556e-17	0.928109	0.989	0.861	2.48643e-13	ILC3_c4
MT-ND5	5.28949e-58	0.926502	0.992	0.913	6.10142e-54	ILC3_c4
RPL27	1.50835e-19	0.874535	0.939	0.771	1.73988e-15	ILC3_c4
RUNX3	2.37735e-17	0.871534	0.611	0.45	2.74227e-13	ILC3_c4	Yes
RPL4	9.74995e-22	0.850673	0.936	0.793	1.12466e-17	ILC3_c4
GIMAP7	2.62206e-51	0.848501	0.563	0.233	3.02455e-47	ILC3_c4
INPP4B	2.19217e-20	0.833806	0.435	0.247	2.52867e-16	ILC3_c4
TMEM173	5.57462e-48	0.833073	0.501	0.206	6.43032e-44	ILC3_c4
FCER1G	7.43776e-58	0.830265	0.752	0.39	8.57946e-54	ILC3_c4
CFLAR	1.14174e-20	0.829141	0.651	0.472	1.317e-16	ILC3_c4
TMC8	6.5508e-44	0.827798	0.728	0.43	7.55635e-40	ILC3_c4
RPS16	3.06872e-16	0.816855	0.955	0.811	3.53977e-12	ILC3_c4
PFN1	2.11151e-22	0.797045	0.957	0.824	2.43563e-18	ILC3_c4
GIMAP6	1.66693e-33	0.794638	0.496	0.246	1.9228e-29	ILC3_c4
FYB1	1.5273e-40	0.783353	0.664	0.355	1.76174e-36	ILC3_c4
RPL31	8.30421e-18	0.779339	0.955	0.812	9.5789e-14	ILC3_c4
CFL1	6.77944e-29	0.774837	0.947	0.798	7.82008e-25	ILC3_c4
IKZF1	1.82939e-31	0.774251	0.776	0.535	2.1102e-27	ILC3_c4	Yes
EPHA4	4.21894e-60	0.772061	0.248	0.048	4.86654e-56	ILC3_c4
STT3B	1.26388e-21	0.751092	0.573	0.379	1.45789e-17	ILC3_c4
HOPX	4.55433e-35	0.740439	0.501	0.244	5.25343e-31	ILC3_c4
EIF4B	2.81017e-17	0.736684	0.707	0.58	3.24154e-13	ILC3_c4
RPS20	3.05079e-15	0.727831	0.947	0.781	3.51909e-11	ILC3_c4
EVL	1.94218e-29	0.724232	0.829	0.614	2.2403e-25	ILC3_c4
TMEM123	8.06737e-24	0.72405	0.747	0.575	9.30571e-20	ILC3_c4
TRGC2	1.81627e-48	0.721873	0.509	0.212	2.09507e-44	ILC3_c4
OGT	4.82108e-21	0.718249	0.72	0.542	5.56111e-17	ILC3_c4
TRIM56	6.3302e-21	0.708029	0.419	0.225	7.30188e-17	ILC3_c4
HLA-F	4.94196e-15	0.695318	0.827	0.672	5.70055e-11	ILC3_c4
SLFN5	4.19893e-30	0.690662	0.584	0.323	4.84347e-26	ILC3_c4
RPS6	1.20866e-16	0.689697	0.984	0.89	1.39419e-12	ILC3_c4
CD7	3.56914e-26	0.684111	0.84	0.6	4.117e-22	ILC3_c4
HNRNPD	7.16047e-19	0.681812	0.533	0.357	8.2596e-15	ILC3_c4
LTA4H	1.72929e-06	0.681746	0.429	0.331	0.0199474	ILC3_c4
MYO1F	6.25896e-42	0.680479	0.677	0.374	7.21971e-38	ILC3_c4
PABPC1	4.98412e-19	0.680446	0.992	0.941	5.74918e-15	ILC3_c4
ARHGEF1	2.39678e-27	0.680352	0.736	0.511	2.76469e-23	ILC3_c4
PCSK7	2.65996e-19	0.677266	0.355	0.183	3.06826e-15	ILC3_c4
SH2D1B	1.39378e-23	0.675998	0.443	0.234	1.60773e-19	ILC3_c4
HSH2D	1.26945e-37	0.668279	0.48	0.217	1.46431e-33	ILC3_c4
RPL37A	9.18804e-12	0.6673	0.981	0.855	1.05984e-07	ILC3_c4
DIP2A	1.03606e-16	0.667292	0.493	0.324	1.1951e-12	ILC3_c4
RPL38	9.35237e-14	0.666148	0.933	0.781	1.0788e-09	ILC3_c4
IL2RB	3.60155e-14	0.664807	0.595	0.457	4.15438e-10	ILC3_c4		IL2RB
PPIA	4.83306e-12	0.657666	0.848	0.714	5.57493e-08	ILC3_c4
ITGAM	1.83911e-75	0.654636	0.392	0.094	2.12141e-71	ILC3_c4
VAMP2	1.00498e-11	0.64788	0.624	0.512	1.15924e-07	ILC3_c4
PRF1	2.99789e-51	0.647754	0.533	0.199	3.45806e-47	ILC3_c4
RASSF1	3.37901e-12	0.647333	0.459	0.333	3.89769e-08	ILC3_c4
AK	2.97991e-12	0.641222	0.597	0.457	3.43733e-08	ILC3_c4	Yes
ITGAL	8.83743e-21	0.63354	0.483	0.279	1.0194e-16	ILC3_c4
TAPBP	1.18193e-17	0.621205	0.784	0.632	1.36335e-13	ILC3_c4
FOXN3	2.20113e-19	0.621197	0.547	0.352	2.53901e-15	ILC3_c4	Yes
PLAC8	1.34902e-28	0.620315	0.549	0.313	1.5561e-24	ILC3_c4
THEM4	4.42529e-23	0.615662	0.395	0.205	5.10457e-19	ILC3_c4
LUC7L3	4.19572e-23	0.613685	0.653	0.443	4.83977e-19	ILC3_c4
KLF13	4.11257e-25	0.613423	0.461	0.242	4.74385e-21	ILC3_c4	Yes
LAIR1	9.91244e-18	0.60911	0.413	0.24	1.1434e-13	ILC3_c4
TMC6	6.80187e-21	0.608124	0.611	0.419	7.84596e-17	ILC3_c4
SORL1	5.22223e-25	0.602482	0.683	0.428	6.02384e-21	ILC3_c4
PIP4K2A	4.0505e-25	0.601777	0.688	0.463	4.67225e-21	ILC3_c4
TCIRG1	4.8911e-23	0.600716	0.603	0.392	5.64188e-19	ILC3_c4
SNTB2	1.49393e-13	0.598062	0.24	0.119	1.72325e-09	ILC3_c4
DDX17	1.43742e-21	0.596206	0.819	0.651	1.65807e-17	ILC3_c4
SSBP2	2.4548e-19	0.590109	0.491	0.302	2.83161e-15	ILC3_c4
RCSD1	3.30579e-32	0.581557	0.587	0.313	3.81323e-28	ILC3_c4
CD226	1.42164e-32	0.580291	0.368	0.148	1.63986e-28	ILC3_c4
FGR	2.10342e-33	0.577971	0.307	0.105	2.42629e-29	ILC3_c4
TRGC1	1.03756e-38	0.577559	0.576	0.303	1.19683e-34	ILC3_c4
HCST	6.4123e-26	0.572846	0.653	0.381	7.39659e-22	ILC3_c4
CD81	5.16208e-11	0.570195	0.44	0.315	5.95446e-07	ILC3_c4
BIN2	2.06507e-14	0.566971	0.565	0.408	2.38206e-10	ILC3_c4
KIAA0319L	3.07629e-18	0.565085	0.368	0.198	3.5485e-14	ILC3_c4
C1orf162	1.07266e-32	0.561789	0.432	0.194	1.23731e-28	ILC3_c4
CELF2	7.18809e-16	0.561234	0.811	0.663	8.29147e-12	ILC3_c4
MCTP2	2.01308e-18	0.559912	0.325	0.161	2.32209e-14	ILC3_c4
RPL13A	1.24086e-17	0.559874	0.957	0.856	1.43133e-13	ILC3_c4
RPL10A	1.45751e-10	0.559176	0.904	0.787	1.68124e-06	ILC3_c4
CCND3	5.74346e-15	0.558732	0.616	0.46	6.62508e-11	ILC3_c4
TTN	3.02826e-10	0.557941	0.472	0.322	3.4931e-06	ILC3_c4
MT-CO3	6.05998e-13	0.557526	1	0.986	6.99019e-09	ILC3_c4
ACAP1	1.10094e-13	0.555577	0.664	0.524	1.26993e-09	ILC3_c4
TPST2	4.50224e-20	0.555462	0.384	0.203	5.19334e-16	ILC3_c4
ACTN4	7.52392e-13	0.54663	0.576	0.406	8.67884e-09	ILC3_c4
GPR183	4.17525e-15	0.546375	0.576	0.403	4.81615e-11	ILC3_c4
RUNX2	5.2318e-14	0.543799	0.536	0.365	6.03489e-10	ILC3_c4	Yes
ZBTB7A	7.87864e-15	0.538814	0.293	0.153	9.08801e-11	ILC3_c4	Yes
UBA52	1.3932e-09	0.53841	0.933	0.808	1.60705e-05	ILC3_c4
RPL23A	2.3889e-14	0.53797	0.965	0.831	2.75559e-10	ILC3_c4
SIGIRR	2.56642e-29	0.536023	0.528	0.276	2.96036e-25	ILC3_c4
CAP1	3.79603e-15	0.535001	0.603	0.448	4.37872e-11	ILC3_c4
RPLP2	1.68275e-11	0.534751	0.989	0.888	1.94106e-07	ILC3_c4
RPL3	1.53209e-17	0.529836	0.968	0.857	1.76727e-13	ILC3_c4
KRI1	1.79352e-25	0.528429	0.381	0.179	2.06882e-21	ILC3_c4
TSPAN32	2.0493e-59	0.52777	0.528	0.2	2.36387e-55	ILC3_c4
MLXIP	7.71494e-19	0.525363	0.477	0.292	8.89918e-15	ILC3_c4	Yes
BTN3A2	6.92548e-21	0.523948	0.565	0.355	7.98854e-17	ILC3_c4
RPS6KA3	4.83742e-11	0.518611	0.595	0.454	5.57997e-07	ILC3_c4
CTBP1	7.95149e-13	0.518493	0.499	0.359	9.17204e-09	ILC3_c4
ARAP2	6.80531e-13	0.516115	0.469	0.31	7.84992e-09	ILC3_c4
ARHGAP15	3.44893e-09	0.515053	0.539	0.424	3.97834e-05	ILC3_c4
STAG2	4.07746e-07	0.513621	0.525	0.424	0.00470335	ILC3_c4
CD53	4.82444e-13	0.509211	0.795	0.715	5.56499e-09	ILC3_c4
CLASP1	9.49464e-13	0.507734	0.363	0.222	1.09521e-08	ILC3_c4
MMP25	7.40913e-20	0.506409	0.349	0.171	8.54643e-16	ILC3_c4
ABLIM1	9.77179e-12	0.505922	0.459	0.314	1.12718e-07	ILC3_c4
C1orf56	1.5315e-15	0.503169	0.269	0.134	1.76659e-11	ILC3_c4
MLLT6	2.10952e-14	0.502489	0.555	0.393	2.43333e-10	ILC3_c4
INPP5D	4.07736e-09	0.500865	0.584	0.459	4.70324e-05	ILC3_c4
YPEL1	3.29773e-36	0.500753	0.2	0.048	3.80393e-32	ILC3_c4
CMIP	2.0996e-16	0.500586	0.315	0.162	2.42189e-12	ILC3_c4
ATM	7.58379e-18	0.500367	0.723	0.505	8.7479e-14	ILC3_c4
COL24A1	3.81391e-67	0.499346	0.211	0.031	4.39934e-63	ILC3_c4
AAK1	8.68175e-10	0.498806	0.656	0.531	1.00144e-05	ILC3_c4
NCALD	9.17779e-16	0.497223	0.376	0.215	1.05866e-11	ILC3_c4
SET	6.56447e-12	0.496887	0.707	0.581	7.57212e-08	ILC3_c4
DYRK2	2.08477e-19	0.495617	0.328	0.161	2.40478e-15	ILC3_c4
ETS1	3.93446e-08	0.495477	0.683	0.606	0.00045384	ILC3_c4	Yes
CAC1A	1.53163e-08	0.494507	0.115	0.048	0.000176673	ILC3_c4
TSX	1.63314e-24	0.492876	0.389	0.192	1.88383e-20	ILC3_c4
SEMA4D	5.58255e-12	0.489853	0.541	0.4	6.43947e-08	ILC3_c4
RPL7	2.8142e-06	0.487415	0.525	0.426	0.0324618	ILC3_c4
IL18	2.31532e-19	0.486733	0.165	0.055	2.67072e-15	ILC3_c4		IL18
CHD9	2.89403e-13	0.486511	0.461	0.304	3.33826e-09	ILC3_c4
GIMAP4	5.19228e-09	0.484336	0.237	0.134	5.98929e-05	ILC3_c4
CIRBP	7.11059e-11	0.482098	0.763	0.664	8.20206e-07	ILC3_c4
TRAF3IP3	2.68912e-20	0.481979	0.528	0.324	3.1019e-16	ILC3_c4
PRMT2	7.61059e-12	0.480754	0.573	0.425	8.77882e-08	ILC3_c4
ARL4C	4.37174e-10	0.480627	0.472	0.331	5.0428e-06	ILC3_c4
LARP1	4.2939e-11	0.478466	0.357	0.228	4.95302e-07	ILC3_c4
SPN	4.95097e-13	0.478088	0.547	0.385	5.71095e-09	ILC3_c4
ARHGAP25	2.22513e-23	0.475413	0.373	0.171	2.56669e-19	ILC3_c4
CORO1A	5.9384e-09	0.473946	0.685	0.577	6.84994e-05	ILC3_c4
ABCA2	7.91e-26	0.473859	0.371	0.171	9.12419e-22	ILC3_c4
CDC25B	1.88151e-21	0.47382	0.291	0.124	2.17032e-17	ILC3_c4
SYNRG	1.60993e-10	0.473015	0.472	0.344	1.85705e-06	ILC3_c4
CHST12	3.97191e-19	0.47256	0.344	0.171	4.5816e-15	ILC3_c4
STK38	3.32846e-22	0.471643	0.373	0.181	3.83938e-18	ILC3_c4
SOX4	4.99961e-08	0.471361	0.325	0.213	0.000576705	ILC3_c4	Yes
NFATC2IP	1.63308e-18	0.467063	0.341	0.172	1.88375e-14	ILC3_c4
KLRF1	3.43874e-15	0.467061	0.216	0.094	3.96658e-11	ILC3_c4
ADCY7	6.91032e-22	0.467024	0.363	0.177	7.97106e-18	ILC3_c4
RPS2	3.06419e-08	0.466458	0.96	0.872	0.000353454	ILC3_c4
HNRNPA1	4.82762e-10	0.465456	0.907	0.81	5.56866e-06	ILC3_c4
PTK2B	1.037e-12	0.464636	0.568	0.419	1.19618e-08	ILC3_c4
APOBEC3C	6.25078e-12	0.4628	0.36	0.228	7.21027e-08	ILC3_c4
CD47	2.72097e-09	0.462287	0.592	0.473	3.13863e-05	ILC3_c4
FOXC1	3.05614e-46	0.462234	0.149	0.022	3.52526e-42	ILC3_c4	Yes
GS	1.38516e-07	0.461097	0.765	0.691	0.00159778	ILC3_c4
PREX1	4.80127e-14	0.459712	0.635	0.469	5.53827e-10	ILC3_c4
YIPF4	9.52314e-15	0.459637	0.408	0.245	1.09849e-10	ILC3_c4
ORAI2	4.34631e-15	0.45863	0.333	0.183	5.01347e-11	ILC3_c4
CD300A	2.55684e-23	0.457198	0.28	0.114	2.94932e-19	ILC3_c4
NCR1	3.6643e-10	0.455063	0.291	0.179	4.22677e-06	ILC3_c4
PRKCB	2.26459e-14	0.452397	0.288	0.15	2.61221e-10	ILC3_c4
GLCCI1	1.6019e-10	0.45188	0.272	0.157	1.84779e-06	ILC3_c4
TC2N	3.41111e-12	0.449919	0.341	0.206	3.93471e-08	ILC3_c4
PNISR	6.58064e-11	0.448991	0.731	0.605	7.59077e-07	ILC3_c4
PRKY	8.9334e-12	0.448964	0.411	0.267	1.03047e-07	ILC3_c4
GLG1	5.23088e-10	0.44844	0.544	0.415	6.03382e-06	ILC3_c4
SUN2	2.48738e-13	0.447573	0.581	0.417	2.86919e-09	ILC3_c4
ATP10A	2.31991e-08	0.446892	0.277	0.178	0.000267602	ILC3_c4
TNRC6C	1.23599e-12	0.446178	0.355	0.216	1.42572e-08	ILC3_c4
SLC9A3R1	2.70821e-12	0.444441	0.597	0.447	3.12392e-08	ILC3_c4
MTF2	6.00073e-07	0.444385	0.331	0.232	0.00692184	ILC3_c4	Yes
ZNF638	2.12316e-08	0.443688	0.445	0.331	0.000244906	ILC3_c4
GIMAP8	8.66983e-32	0.443516	0.195	0.05	1.00007e-27	ILC3_c4
RPL15	7.53898e-11	0.443382	0.96	0.845	8.69622e-07	ILC3_c4
SAMD3	5.80055e-44	0.443218	0.381	0.129	6.69094e-40	ILC3_c4
CALM1	7.95919e-12	0.44263	0.915	0.817	9.18093e-08	ILC3_c4
STAT6	4.88082e-10	0.440624	0.44	0.317	5.63003e-06	ILC3_c4	Yes
CARD8	9.0514e-11	0.440554	0.432	0.298	1.04408e-06	ILC3_c4
BAZ2A	1.14727e-09	0.440281	0.467	0.343	1.32337e-05	ILC3_c4	Yes
TSPAN14	1.12163e-20	0.439672	0.392	0.203	1.2938e-16	ILC3_c4
FGD3	6.0441e-15	0.439285	0.539	0.364	6.97187e-11	ILC3_c4
S1PR1	2.28722e-09	0.437684	0.219	0.119	2.63831e-05	ILC3_c4
GFOD1	1.05967e-10	0.436758	0.24	0.129	1.22232e-06	ILC3_c4
LDLRAP1	2.26451e-13	0.434319	0.216	0.101	2.61211e-09	ILC3_c4
CD63	3.949e-12	0.432673	0.619	0.493	4.55517e-08	ILC3_c4
SPINK2	2.54969e-16	0.428584	0.376	0.216	2.94106e-12	ILC3_c4
TNRC6B	4.87651e-12	0.428369	0.709	0.564	5.62506e-08	ILC3_c4
PXN	1.53523e-26	0.427774	0.432	0.21	1.77089e-22	ILC3_c4
RPS9	5.23349e-08	0.42753	0.883	0.768	0.000603683	ILC3_c4
TTC3	1.37007e-06	0.427335	0.485	0.396	0.0158037	ILC3_c4
HDAC7	1.20595e-13	0.426724	0.336	0.19	1.39106e-09	ILC3_c4
FBL	8.27679e-07	0.425172	0.389	0.299	0.00954728	ILC3_c4
CRBN	8.39197e-14	0.425058	0.395	0.235	9.68014e-10	ILC3_c4
NUCKS1	5.01349e-07	0.423723	0.432	0.338	0.00578306	ILC3_c4
DBNL	4.72034e-09	0.423379	0.379	0.267	5.44492e-05	ILC3_c4
CAPNS1	3.29478e-13	0.421739	0.347	0.203	3.80053e-09	ILC3_c4
ZFHX3	2.2345e-16	0.421463	0.245	0.11	2.5775e-12	ILC3_c4	Yes
GQ	3.343e-09	0.421393	0.328	0.211	3.85615e-05	ILC3_c4
ARID1A	5.12544e-12	0.42059	0.52	0.362	5.91219e-08	ILC3_c4
POLR2J3	4.79366e-15	0.420116	0.317	0.167	5.52948e-11	ILC3_c4
ARRB2	6.10193e-10	0.418905	0.389	0.267	7.03857e-06	ILC3_c4
DNMT3A	6.96061e-09	0.417551	0.421	0.298	8.02906e-05	ILC3_c4
LENG8	1.85336e-16	0.416266	0.536	0.367	2.13785e-12	ILC3_c4
FLOT1	5.32442e-11	0.416049	0.408	0.277	6.14172e-07	ILC3_c4
PTEN	8.28975e-10	0.415805	0.403	0.29	9.56223e-06	ILC3_c4
TUG1	1.51079e-09	0.414796	0.373	0.251	1.74269e-05	ILC3_c4
FOXP1	1.00402e-09	0.413305	0.624	0.489	1.15814e-05	ILC3_c4	Yes
RFLNB	5.33706e-13	0.411584	0.251	0.129	6.1563e-09	ILC3_c4
TRIM33	8.11795e-11	0.41128	0.445	0.303	9.36405e-07	ILC3_c4
CCDC69	7.70668e-10	0.411271	0.467	0.335	8.88965e-06	ILC3_c4
CD38	6.56281e-12	0.411201	0.237	0.122	7.57021e-08	ILC3_c4
SNHG5	1.03887e-07	0.410199	0.72	0.616	0.00119833	ILC3_c4
PTP4A2	2.23597e-11	0.409745	0.485	0.342	2.57919e-07	ILC3_c4
QARS	5.11502e-09	0.409192	0.328	0.217	5.90017e-05	ILC3_c4
N4BP2L2	8.02726e-10	0.408517	0.701	0.587	9.25945e-06	ILC3_c4
SP100	9.86579e-11	0.407804	0.632	0.504	1.13802e-06	ILC3_c4	Yes
ITGA5	1.18406e-13	0.407625	0.323	0.18	1.36581e-09	ILC3_c4
SLC44A2	9.01691e-08	0.407031	0.389	0.279	0.0010401	ILC3_c4
PLA2G6	1.22298e-20	0.406814	0.232	0.092	1.4107e-16	ILC3_c4
ZYX	1.71209e-10	0.404873	0.339	0.219	1.9749e-06	ILC3_c4
SELPLG	4.74509e-13	0.404739	0.451	0.286	5.47346e-09	ILC3_c4
C16orf54	5.13239e-15	0.40436	0.288	0.148	5.92021e-11	ILC3_c4
SYK	4.47081e-20	0.404335	0.323	0.151	5.15708e-16	ILC3_c4
TMSB4X	2.77063e-12	0.403687	0.995	0.918	3.19592e-08	ILC3_c4
YPEL3	1.62549e-09	0.403026	0.376	0.255	1.875e-05	ILC3_c4
CASP4	2.32517e-07	0.402112	0.371	0.267	0.00268208	ILC3_c4
SPTBN1	1.05874e-18	0.401463	0.403	0.212	1.22126e-14	ILC3_c4
HLA-E	2.17437e-13	0.401094	0.973	0.919	2.50813e-09	ILC3_c4
RACK1	1.89217e-09	0.400611	0.907	0.806	2.18262e-05	ILC3_c4
ERGIC3	1.81316e-06	0.40013	0.376	0.291	0.0209148	ILC3_c4
ITGB2	5.87607e-18	0.399565	0.571	0.361	6.77805e-14	ILC3_c4
EOMES	6.76652e-11	0.397325	0.173	0.078	7.80518e-07	ILC3_c4	Yes
FLNB	2.38134e-14	0.395249	0.293	0.152	2.74688e-10	ILC3_c4
ZKSCAN1	8.14973e-13	0.395114	0.336	0.196	9.40072e-09	ILC3_c4	Yes
PECAM1	4.30901e-11	0.394738	0.309	0.182	4.97045e-07	ILC3_c4
PTPN7	2.03816e-10	0.394321	0.536	0.396	2.35101e-06	ILC3_c4
RBM5	4.70946e-09	0.393351	0.507	0.385	5.43236e-05	ILC3_c4
SMAP2	1.5994e-07	0.392845	0.603	0.517	0.00184491	ILC3_c4
PNPLA2	1.13348e-08	0.392539	0.405	0.289	0.000130747	ILC3_c4
KPNB1	2.26292e-06	0.391801	0.451	0.358	0.0261028	ILC3_c4
MOB3A	6.68076e-07	0.390347	0.443	0.339	0.00770625	ILC3_c4
PRAM1	4.73738e-31	0.390158	0.352	0.141	5.46456e-27	ILC3_c4
ZNF207	4.65756e-08	0.390024	0.541	0.435	0.00053725	ILC3_c4	Yes
ANKRD13D	9.02686e-11	0.388176	0.304	0.183	1.04125e-06	ILC3_c4
ZMYND8	1.74619e-10	0.387828	0.368	0.238	2.01423e-06	ILC3_c4
CRTAM	1.6148e-13	0.387657	0.227	0.106	1.86267e-09	ILC3_c4
MSN	1.79893e-08	0.386576	0.693	0.595	0.000207507	ILC3_c4
SPTSSB	5.43672e-19	0.385945	0.115	0.03	6.27126e-15	ILC3_c4
BTN3A1	7.25475e-11	0.385068	0.419	0.28	8.36835e-07	ILC3_c4
CCNI	4.31436e-07	0.384416	0.763	0.691	0.00497662	ILC3_c4
MLEC	1.95713e-06	0.382957	0.269	0.184	0.0225755	ILC3_c4
TRABD	2.70357e-16	0.38193	0.467	0.294	3.11856e-12	ILC3_c4
GIMAP1	7.01739e-19	0.380527	0.309	0.146	8.09456e-15	ILC3_c4
YWHAB	1.05989e-06	0.378534	0.712	0.635	0.0122258	ILC3_c4
DOCK7	1.61102e-09	0.378442	0.203	0.106	1.85831e-05	ILC3_c4
CREBRF	3.95735e-09	0.378123	0.331	0.211	4.5648e-05	ILC3_c4
NLRC3	1.45954e-17	0.376469	0.483	0.288	1.68358e-13	ILC3_c4
RASAL3	1.08568e-07	0.375967	0.448	0.344	0.00125234	ILC3_c4
NOL4L	5.30599e-08	0.375401	0.427	0.32	0.000612046	ILC3_c4
DPP9	4.84153e-09	0.375161	0.285	0.176	5.5847e-05	ILC3_c4
PTPN6	2.53029e-06	0.371182	0.371	0.271	0.0291869	ILC3_c4
SATB1	2.7878e-10	0.370328	0.6	0.458	3.21572e-06	ILC3_c4	Yes
APC16	2.06741e-09	0.369983	0.576	0.465	2.38475e-05	ILC3_c4
CNTRL	2.96833e-09	0.369528	0.405	0.275	3.42397e-05	ILC3_c4
MAVS	4.15214e-09	0.367687	0.259	0.153	4.78949e-05	ILC3_c4
SKAP2	5.19627e-09	0.3651	0.395	0.272	5.9939e-05	ILC3_c4
TRIM44	1.30274e-06	0.364483	0.355	0.254	0.0150271	ILC3_c4
PIK3CD	3.656e-08	0.364113	0.469	0.357	0.000421719	ILC3_c4
ZMIZ1	1.39063e-14	0.363677	0.408	0.244	1.60409e-10	ILC3_c4
BPTF	1.2596e-07	0.363325	0.552	0.447	0.00145295	ILC3_c4	Yes
ARPC5	3.86533e-10	0.362472	0.499	0.364	4.45866e-06	ILC3_c4
GLIPR2	2.10051e-07	0.362011	0.347	0.243	0.00242294	ILC3_c4
GIMAP2	3.11095e-11	0.361358	0.309	0.183	3.58848e-07	ILC3_c4
LIMD2	5.28804e-14	0.360799	0.597	0.45	6.09976e-10	ILC3_c4
FLI1	2.60027e-12	0.360324	0.44	0.285	2.99941e-08	ILC3_c4	Yes
TNK2	1.10152e-12	0.359928	0.309	0.181	1.2706e-08	ILC3_c4
TMEM63A	1.31246e-10	0.359411	0.333	0.205	1.51392e-06	ILC3_c4
TLN1	9.62979e-07	0.358242	0.685	0.591	0.011108	ILC3_c4
TRAF5	3.94377e-09	0.357701	0.432	0.307	4.54914e-05	ILC3_c4
APOBEC3G	1.96489e-06	0.355928	0.288	0.195	0.0226651	ILC3_c4
IGFBP4	9.41536e-07	0.355628	0.275	0.187	0.0108606	ILC3_c4
SRGAP3	3.82174e-13	0.354665	0.333	0.188	4.40838e-09	ILC3_c4
RPL37	8.22515e-07	0.353953	0.971	0.878	0.00948771	ILC3_c4
WASF2	1.86211e-08	0.353585	0.525	0.403	0.000214794	ILC3_c4
TBC1D2B	8.81674e-11	0.352884	0.317	0.189	1.01701e-06	ILC3_c4
MT-CYB	6.33789e-17	0.352509	1	0.976	7.31076e-13	ILC3_c4
GAS5	2.20683e-06	0.35155	0.704	0.586	0.0254558	ILC3_c4
UTRN	1.817e-07	0.351278	0.656	0.525	0.00209591	ILC3_c4
EEF2	2.40394e-06	0.351248	0.859	0.78	0.0277295	ILC3_c4
GATAD1	6.47606e-14	0.351227	0.347	0.203	7.47014e-10	ILC3_c4
SAMHD1	1.10626e-15	0.35087	0.427	0.246	1.27607e-11	ILC3_c4
RIN3	1.17741e-07	0.350759	0.528	0.414	0.00135814	ILC3_c4
APC5	2.58498e-08	0.350039	0.467	0.34	0.000298177	ILC3_c4
ARAP1	4.72757e-14	0.34866	0.315	0.173	5.45325e-10	ILC3_c4
MDFIC	2.1186e-10	0.347296	0.443	0.299	2.44381e-06	ILC3_c4
CSNK2A1	3.49706e-07	0.347244	0.264	0.172	0.00403386	ILC3_c4
KIAA2026	9.28913e-08	0.34692	0.32	0.213	0.0010715	ILC3_c4
NUCB2	1.63042e-10	0.346838	0.309	0.187	1.88069e-06	ILC3_c4
SNRNP70	1.30545e-10	0.346426	0.517	0.373	1.50584e-06	ILC3_c4
2023-03-06	9.2687e-08	0.345717	0.581	0.462	0.00106914	ILC3_c4
SP110	1.41196e-08	0.345124	0.357	0.251	0.000162869	ILC3_c4	Yes
GSE1	4.07579e-07	0.344294	0.341	0.231	0.00470143	ILC3_c4
GPR155	1.67506e-16	0.343152	0.213	0.087	1.93218e-12	ILC3_c4
ACTR2	6.75606e-07	0.342705	0.491	0.391	0.00779311	ILC3_c4
C11orf21	2.52369e-43	0.342146	0.267	0.07	2.91108e-39	ILC3_c4
GIGYF1	8.31225e-09	0.341384	0.411	0.296	9.58819e-05	ILC3_c4
RAB37	2.07425e-07	0.341129	0.365	0.261	0.00239264	ILC3_c4
PLCL2	3.95255e-10	0.340507	0.275	0.155	4.55926e-06	ILC3_c4
SRRM2	1.153e-07	0.340108	0.789	0.696	0.00132998	ILC3_c4
GI2	1.25749e-11	0.339258	0.523	0.38	1.45052e-07	ILC3_c4
RNF220	3.96279e-08	0.339168	0.203	0.117	0.000457108	ILC3_c4
CASP8	5.94332e-10	0.338805	0.485	0.347	6.85562e-06	ILC3_c4
ZNF276	2.02593e-13	0.338657	0.301	0.165	2.33691e-09	ILC3_c4	Yes
RAC2	9.80178e-11	0.33775	0.739	0.615	1.13063e-06	ILC3_c4
NUP210	9.51386e-09	0.336789	0.392	0.267	0.000109742	ILC3_c4
IQGAP2	1.78894e-10	0.334066	0.525	0.375	2.06354e-06	ILC3_c4
SH2D3C	6.13234e-17	0.333709	0.251	0.112	7.07365e-13	ILC3_c4
EMB	4.8442e-08	0.332447	0.515	0.392	0.000558779	ILC3_c4
DNM2	2.83719e-07	0.331578	0.435	0.339	0.0032727	ILC3_c4
ESCO2	2.51967e-16	0.330857	0.123	0.037	2.90644e-12	ILC3_c4
IL2RA	2.83134e-06	0.330676	0.315	0.216	0.0326595	ILC3_c4		IL2RA
CTC1	1.16319e-10	0.32954	0.264	0.149	1.34174e-06	ILC3_c4
PPP1R12A	1.3814e-06	0.329371	0.531	0.439	0.0159345	ILC3_c4
C1GALT1	1.69872e-07	0.328675	0.288	0.187	0.00195948	ILC3_c4
UNC93B1	1.67984e-28	0.3275	0.307	0.115	1.9377e-24	ILC3_c4
RER1	2.84101e-08	0.32669	0.323	0.219	0.000327711	ILC3_c4
MED13L	1.31202e-08	0.324876	0.336	0.22	0.000151342	ILC3_c4
NCKAP1L	1.5019e-07	0.322878	0.36	0.25	0.00173244	ILC3_c4
GALNT6	7.02594e-09	0.322239	0.179	0.092	8.10442e-05	ILC3_c4
MAP3K12	8.41339e-12	0.321671	0.181	0.082	9.70485e-08	ILC3_c4
ARHGDIB	4.59395e-10	0.320427	0.875	0.811	5.29912e-06	ILC3_c4
RNF165	2.45058e-37	0.320266	0.189	0.042	2.82674e-33	ILC3_c4
GRK6	5.81356e-17	0.319197	0.365	0.198	6.70594e-13	ILC3_c4
S100PBP	1.53293e-09	0.318605	0.237	0.134	1.76823e-05	ILC3_c4
CASK	4.98701e-11	0.317903	0.232	0.121	5.75251e-07	ILC3_c4
FAM111A	1.40078e-08	0.3177	0.275	0.17	0.00016158	ILC3_c4
DGKZ	2.6543e-12	0.316898	0.363	0.22	3.06173e-08	ILC3_c4
RAB29	1.15989e-06	0.316631	0.203	0.122	0.0133793	ILC3_c4
PLEC	2.10148e-06	0.316065	0.384	0.288	0.0242406	ILC3_c4
GRAMD4	2.74872e-22	0.314826	0.219	0.078	3.17065e-18	ILC3_c4
ARHGAP4	8.43146e-07	0.314219	0.416	0.318	0.00972568	ILC3_c4
ATF6B	2.32531e-08	0.313867	0.285	0.183	0.000268224	ILC3_c4	Yes
ASB8	2.67673e-07	0.312876	0.195	0.112	0.0030876	ILC3_c4
ZNF791	1.57289e-08	0.312272	0.245	0.144	0.000181432	ILC3_c4	Yes
SIPA1	6.84218e-10	0.312177	0.259	0.147	7.89246e-06	ILC3_c4
CTCF	7.01564e-07	0.310889	0.253	0.163	0.00809254	ILC3_c4	Yes
CUX1	9.25906e-07	0.31052	0.301	0.208	0.0106803	ILC3_c4	Yes
C2orf68	7.38489e-11	0.30816	0.325	0.196	8.51847e-07	ILC3_c4
MAP3K1	1.23535e-13	0.308019	0.333	0.18	1.42497e-09	ILC3_c4
CST3	6.1622e-34	0.307972	0.285	0.093	7.10809e-30	ILC3_c4
MFNG	1.2721e-08	0.307738	0.344	0.23	0.000146736	ILC3_c4
PCNX1	1.38646e-07	0.307271	0.485	0.364	0.00159929	ILC3_c4
WBP2	2.41547e-07	0.306953	0.408	0.307	0.00278624	ILC3_c4
DENND5A	1.48202e-06	0.306563	0.256	0.169	0.0170951	ILC3_c4
MARK2	1.61e-15	0.305546	0.301	0.153	1.85714e-11	ILC3_c4
ARPC4	3.95341e-09	0.30524	0.549	0.43	4.56026e-05	ILC3_c4
TOP2B	2.00495e-10	0.305139	0.432	0.288	2.3127e-06	ILC3_c4
SPECC1	4.26717e-10	0.304451	0.291	0.174	4.92218e-06	ILC3_c4
CDK13	3.27386e-10	0.303656	0.421	0.284	3.7764e-06	ILC3_c4
SLC7A6	2.17962e-13	0.303353	0.349	0.204	2.51419e-09	ILC3_c4
PLX4	3.67591e-16	0.30192	0.115	0.033	4.24017e-12	ILC3_c4
CAB39	1.82046e-09	0.301306	0.283	0.168	2.0999e-05	ILC3_c4
CBX4	7.32139e-11	0.300958	0.216	0.11	8.44522e-07	ILC3_c4
NCK2	2.122e-08	0.300712	0.216	0.123	0.000244772	ILC3_c4
NLRP1	9.04105e-11	0.299567	0.427	0.281	1.04289e-06	ILC3_c4
RASSF8	1.90136e-08	0.299564	0.141	0.067	0.000219322	ILC3_c4
ADAMTS10	6.87833e-32	0.299525	0.229	0.067	7.93415e-28	ILC3_c4
FBRSL1	5.59021e-22	0.299042	0.245	0.095	6.44831e-18	ILC3_c4
ABHD2	9.48867e-07	0.29807	0.261	0.172	0.0109452	ILC3_c4
RBM26	8.74184e-07	0.297434	0.347	0.244	0.0100837	ILC3_c4
EPB41	2.86765e-08	0.296989	0.427	0.306	0.000330783	ILC3_c4
WAC	1.82766e-09	0.296784	0.547	0.411	2.1082e-05	ILC3_c4
EFHC2	6.07058e-20	0.296644	0.096	0.021	7.00241e-16	ILC3_c4
TAF10	3.22712e-10	0.295719	0.333	0.213	3.72249e-06	ILC3_c4
SCAF11	1.04388e-08	0.295436	0.653	0.528	0.000120411	ILC3_c4
FERMT3	2.47832e-06	0.295194	0.331	0.234	0.0285874	ILC3_c4
DENND4B	7.99154e-13	0.294568	0.315	0.175	9.21825e-09	ILC3_c4
COL9A2	1.38473e-09	0.294345	0.232	0.129	1.59728e-05	ILC3_c4
KMT5B	3.82149e-06	0.293996	0.259	0.171	0.0440808	ILC3_c4
CLNK	8.38252e-08	0.293742	0.221	0.129	0.000966924	ILC3_c4
NBEAL2	3.10079e-08	0.293559	0.296	0.188	0.000357676	ILC3_c4
IREB2	2.02091e-06	0.293539	0.264	0.176	0.0233112	ILC3_c4
FXYD5	2.93077e-12	0.292936	0.864	0.751	3.38064e-08	ILC3_c4
GMFG	1.7146e-09	0.291362	0.627	0.501	1.9778e-05	ILC3_c4
HDGF	5.50692e-08	0.29052	0.232	0.138	0.000635223	ILC3_c4
MKRN1	1.00575e-06	0.287739	0.307	0.211	0.0116014	ILC3_c4
KANSL1	1.40611e-07	0.287669	0.504	0.379	0.00162195	ILC3_c4
RNF44	2.01416e-10	0.287003	0.392	0.257	2.32334e-06	ILC3_c4
SAMD4B	2.27329e-07	0.28629	0.221	0.134	0.00262225	ILC3_c4
STX16	1.80521e-07	0.285542	0.435	0.32	0.00208231	ILC3_c4
RASGRP2	4.94644e-20	0.285033	0.357	0.175	5.70571e-16	ILC3_c4
HPS1	2.37865e-10	0.284999	0.304	0.18	2.74377e-06	ILC3_c4
JAK3	4.28558e-06	0.284875	0.459	0.368	0.0494342	ILC3_c4
TRIM28	1.90805e-06	0.284287	0.363	0.272	0.0220094	ILC3_c4
IL16	4.32843e-07	0.282946	0.435	0.315	0.00499285	ILC3_c4
UBASH3B	3.15985e-10	0.282849	0.331	0.201	3.64488e-06	ILC3_c4
RGL2	1.23531e-10	0.282087	0.251	0.139	1.42494e-06	ILC3_c4
RPL35	7.91961e-07	0.281899	0.915	0.79	0.00913527	ILC3_c4
LSM4	3.31124e-06	0.281056	0.339	0.249	0.0381951	ILC3_c4
IRF2BPL	2.16508e-08	0.280498	0.291	0.187	0.000249742	ILC3_c4
DAZAP2	2.49848e-06	0.279899	0.76	0.65	0.02882	ILC3_c4
CCDC88B	1.39117e-06	0.277954	0.296	0.206	0.0160471	ILC3_c4
ITM2C	2.62736e-07	0.276546	0.437	0.325	0.00303066	ILC3_c4
SLFN13	7.19618e-07	0.275631	0.227	0.14	0.0083008	ILC3_c4
BAZ2B	1.11381e-06	0.274973	0.48	0.373	0.0128478	ILC3_c4	Yes
TSC2	3.80413e-08	0.274675	0.296	0.189	0.000438807	ILC3_c4
ID2	1.51464e-09	0.273915	0.891	0.799	1.74713e-05	ILC3_c4
IP	1.74936e-18	0.273295	0.139	0.042	2.01789e-14	ILC3_c4
ZNF302	4.8797e-11	0.272846	0.405	0.261	5.62874e-07	ILC3_c4	Yes
CAPN12	4.42311e-13	0.27271	0.237	0.115	5.10205e-09	ILC3_c4
MYO9B	1.20438e-06	0.272506	0.371	0.277	0.0138925	ILC3_c4
NOTCH1	3.5935e-09	0.272203	0.291	0.182	4.14511e-05	ILC3_c4
PPP1R18	8.73714e-09	0.272035	0.411	0.287	0.000100783	ILC3_c4
ABR	8.54196e-10	0.269504	0.227	0.125	9.85315e-06	ILC3_c4
EPS15	1.797e-07	0.268697	0.432	0.317	0.00207284	ILC3_c4
SLC35E1	6.8602e-07	0.268183	0.267	0.174	0.00791324	ILC3_c4
PPP1R9B	4.14253e-14	0.268041	0.227	0.105	4.77841e-10	ILC3_c4
TES	3.21787e-06	0.267517	0.445	0.338	0.0371182	ILC3_c4
RASA3	1.76048e-13	0.267373	0.275	0.138	2.03072e-09	ILC3_c4
PLD3	1.63996e-08	0.267318	0.317	0.206	0.000189169	ILC3_c4
TMSB10	7.87927e-11	0.266568	0.923	0.812	9.08873e-07	ILC3_c4
CARD11	1.07133e-09	0.264637	0.368	0.242	1.23577e-05	ILC3_c4
ACVR2A	1.96416e-10	0.264492	0.176	0.083	2.26566e-06	ILC3_c4		ACVR2A
DENND6A	1.86042e-09	0.264415	0.237	0.135	2.14599e-05	ILC3_c4
TBC1D10C	1.77645e-06	0.262774	0.416	0.319	0.0204913	ILC3_c4
RPS19	7.61417e-09	0.261631	0.979	0.888	8.78295e-05	ILC3_c4
ACTB	3.32274e-09	0.259627	0.997	0.939	3.83278e-05	ILC3_c4
VEZF1	1.51984e-10	0.259591	0.299	0.176	1.75313e-06	ILC3_c4	Yes
SHKBP1	1.00895e-06	0.259514	0.293	0.199	0.0116382	ILC3_c4
PTP4A3	5.58857e-19	0.259403	0.213	0.08	6.44641e-15	ILC3_c4
MACF1	2.7365e-06	0.259287	0.747	0.669	0.0315656	ILC3_c4
GBA2	1.00191e-06	0.258843	0.171	0.096	0.011557	ILC3_c4
MED15	8.95953e-07	0.258765	0.299	0.202	0.0103348	ILC3_c4
CASP2	8.56929e-08	0.258042	0.235	0.143	0.000988468	ILC3_c4
AKAP10	1.6872e-08	0.25791	0.251	0.147	0.000194619	ILC3_c4
SPG11	1.6987e-11	0.257289	0.419	0.266	1.95945e-07	ILC3_c4
SMAD2	9.70051e-07	0.257063	0.331	0.224	0.0111895	ILC3_c4
NUDT3	2.06269e-06	0.255761	0.141	0.075	0.0237932	ILC3_c4
CRYZL1	5.48474e-09	0.255047	0.216	0.118	6.32665e-05	ILC3_c4
CNR2	2.96758e-32	0.253465	0.147	0.03	3.4231e-28	ILC3_c4
ALDH3A2	7.88661e-07	0.253356	0.187	0.108	0.0090972	ILC3_c4
NEB	6.98468e-07	0.252989	0.067	0.025	0.00805683	ILC3_c4
AMIGO2	6.28807e-13	0.252802	0.083	0.023	7.25329e-09	ILC3_c4
ZNF44	1.18887e-06	0.251389	0.464	0.365	0.0137136	ILC3_c4	Yes
SH3BGRL3	2.79093e-11	0.250919	0.877	0.729	3.21933e-07	ILC3_c4
CLK2	6.08237e-11	0.250722	0.224	0.114	7.01602e-07	ILC3_c4

[truncated: 4 more sheets: ILC3_c5, NK_c1, NK_c2, NK_like]
