# Supplementary material for: Tissue specific imprinting on innate lymphoid cells during homeostasis and disease process revealed by integrative inference of single-cell transcriptomics
Source: Front Immunol. 2023 Mar 7;14:1127413. doi: 10.3389/fimmu.2023.1127413 (PMC10028295; doi:10.3389/fimmu.2023.1127413)
Supplement: Supplementary file 7 [file Table_3.xlsx]

## Sheet: ILC1_c1
Supplementary Table3: Gene ontology analysis (biological processes) of differentially expressed genes across the 14 ILC clusters.
ID	Description	GeneRatio	BgRatio	pvalue	p.adjust	qvalue	geneID	Count
GO:0042110	T cell activation	38/168	487/18723	4.8e-25	1.22e-21	9.93e-22	CD3D/CD3G/CD27/CD6/CD4/CD3E/CD8A/LEF1/BCL11B/SIRPG/LCK/CD28/TNFSF8/B2M/CCL5/CCR7/CD2/CORO1A/LAPTM5/RPS3/RIPOR2/LY9/CAMK4/HLA-DPB1/RASGRP1/PAG1/SOD1/PTPRC/ZAP70/RHOH/CD48/HLA-DPA1/HLA-E/RAC2/SASH3/TNFRSF1B/LGALS1/PTPN6	38
GO:0050863	regulation of T cell activation	32/168	329/18723	4.66e-24	5.95e-21	4.83e-21	CD27/CD6/CD4/CD3E/LEF1/SIRPG/LCK/CD28/TNFSF8/B2M/CCL5/CCR7/CD2/CORO1A/LAPTM5/RPS3/RIPOR2/CAMK4/HLA-DPB1/RASGRP1/PAG1/SOD1/PTPRC/ZAP70/RHOH/HLA-DPA1/HLA-E/RAC2/SASH3/TNFRSF1B/LGALS1/PTPN6	32
GO:0007159	leukocyte cell-cell adhesion	31/168	371/18723	2.43e-21	2.06e-18	1.67e-18	CD27/CD6/CD4/CD3E/LEF1/SIRPG/LCK/CD28/B2M/CCL5/CCR7/SELL/ITGB2/CORO1A/LAPTM5/SELPLG/RPS3/RIPOR2/HLA-DPB1/RASGRP1/PAG1/PTPRC/ZAP70/RHOH/SKAP1/HLA-DPA1/HLA-E/RAC2/SASH3/LGALS1/PTPN6	31
GO:1903039	positive regulation of leukocyte cell-cell adhesion	25/168	239/18723	1.07e-19	6.83e-17	5.54e-17	CD27/CD6/CD4/CD3E/LEF1/SIRPG/LCK/CD28/B2M/CCL5/CCR7/ITGB2/CORO1A/RPS3/HLA-DPB1/RASGRP1/PTPRC/ZAP70/RHOH/SKAP1/HLA-DPA1/HLA-E/SASH3/LGALS1/PTPN6	25
GO:1903037	regulation of leukocyte cell-cell adhesion	28/168	336/18723	2.69e-19	1.37e-16	1.11e-16	CD27/CD6/CD4/CD3E/LEF1/SIRPG/LCK/CD28/B2M/CCL5/CCR7/ITGB2/CORO1A/LAPTM5/RPS3/RIPOR2/HLA-DPB1/RASGRP1/PAG1/PTPRC/ZAP70/RHOH/SKAP1/HLA-DPA1/HLA-E/SASH3/LGALS1/PTPN6	28
GO:0022409	positive regulation of cell-cell adhesion	25/168	284/18723	7.07e-18	2.58e-15	2.09e-15	CD27/CD6/CD4/CD3E/LEF1/SIRPG/LCK/CD28/B2M/CCL5/CCR7/ITGB2/CORO1A/RPS3/HLA-DPB1/RASGRP1/PTPRC/ZAP70/RHOH/SKAP1/HLA-DPA1/HLA-E/SASH3/LGALS1/PTPN6	25
GO:0002696	positive regulation of leukocyte activation	28/168	409/18723	4.77e-17	1.37e-14	1.11e-14	CD27/CD6/CD4/CD3E/LEF1/SIRPG/LCK/CD28/B2M/CCL5/CCR7/ITGB2/TRBC2/CD2/CORO1A/RPS3/HLA-DPB1/RASGRP1/PTPRC/ZAP70/RHOH/HLA-DPA1/HLA-E/SASH3/LGALS1/TRBC1/CTSC/PTPN6	28
GO:0030098	lymphocyte differentiation	27/168	374/18723	4.82e-17	1.37e-14	1.11e-14	CD3D/CD3G/CD27/CD4/CD3E/CD8A/LEF1/BCL11B/LCK/CD28/TNFSF8/B2M/CCR7/IKZF3/CMTM7/CD2/LY9/CAMK4/RASGRP1/SOD1/PTPRC/ITM2A/ZAP70/RHOH/SASH3/LGALS1/PTPN6	27
GO:0050867	positive regulation of cell activation	28/168	420/18723	9.48e-17	2.42e-14	1.96e-14	CD27/CD6/CD4/CD3E/LEF1/SIRPG/LCK/CD28/B2M/CCL5/CCR7/ITGB2/TRBC2/CD2/CORO1A/RPS3/HLA-DPB1/RASGRP1/PTPRC/ZAP70/RHOH/HLA-DPA1/HLA-E/SASH3/LGALS1/TRBC1/CTSC/PTPN6	28
GO:0022407	regulation of cell-cell adhesion	28/168	448/18723	4.98e-16	1.16e-13	9.38e-14	CD27/CD6/CD4/CD3E/LEF1/SIRPG/LCK/CD28/B2M/CCL5/CCR7/ITGB2/CORO1A/LAPTM5/RPS3/RIPOR2/HLA-DPB1/RASGRP1/PAG1/PTPRC/ZAP70/RHOH/SKAP1/HLA-DPA1/HLA-E/SASH3/LGALS1/PTPN6	28
GO:1903131	mononuclear cell differentiation	27/168	426/18723	1.24e-15	2.64e-13	2.14e-13	CD3D/CD3G/CD27/CD4/CD3E/CD8A/LEF1/BCL11B/LCK/CD28/TNFSF8/B2M/CCR7/IKZF3/CMTM7/CD2/LY9/CAMK4/RASGRP1/SOD1/PTPRC/ITM2A/ZAP70/RHOH/SASH3/LGALS1/PTPN6	27
GO:0030217	T cell differentiation	22/168	257/18723	1.39e-15	2.73e-13	2.22e-13	CD3D/CD3G/CD27/CD4/CD3E/CD8A/LEF1/BCL11B/LCK/CD28/TNFSF8/B2M/CCR7/CD2/LY9/CAMK4/RASGRP1/SOD1/PTPRC/ZAP70/RHOH/SASH3	22
GO:0051251	positive regulation of lymphocyte activation	25/168	362/18723	2.16e-15	3.94e-13	3.2e-13	CD27/CD6/CD4/CD3E/LEF1/SIRPG/LCK/CD28/B2M/CCL5/CCR7/TRBC2/CORO1A/RPS3/HLA-DPB1/RASGRP1/PTPRC/ZAP70/RHOH/HLA-DPA1/HLA-E/SASH3/LGALS1/TRBC1/PTPN6	25
GO:0045785	positive regulation of cell adhesion	25/168	437/18723	1.59e-13	2.7e-11	2.19e-11	CD27/CD6/CD4/CD3E/LEF1/SIRPG/LCK/CD28/B2M/CCL5/CCR7/ITGB2/CORO1A/RPS3/HLA-DPB1/RASGRP1/PTPRC/ZAP70/RHOH/SKAP1/HLA-DPA1/HLA-E/SASH3/LGALS1/PTPN6	25
GO:0050852	T cell receptor signaling pathway	15/168	123/18723	3.17e-13	5.06e-11	4.1e-11	CD3E/TRAT1/SH2D1A/LCK/CD28/FYB1/CCR7/LAPTM5/RPS3/HLA-DPB1/BTN3A2/PTPRC/ZAP70/SKAP1/PTPN6	15
GO:0042098	T cell proliferation	17/168	199/18723	2.86e-12	4.16e-10	3.38e-10	CD6/CD3E/CD28/TNFSF8/CCL5/CORO1A/RPS3/HLA-DPB1/RASGRP1/PTPRC/ZAP70/HLA-DPA1/HLA-E/RAC2/SASH3/TNFRSF1B/PTPN6	17
GO:0033077	T cell differentiation in thymus	12/168	75/18723	2.94e-12	4.16e-10	3.38e-10	CD3D/CD3G/CD3E/BCL11B/CD28/B2M/CCR7/CAMK4/RASGRP1/SOD1/PTPRC/ZAP70	12
GO:0042129	regulation of T cell proliferation	16/168	171/18723	3.2e-12	4.29e-10	3.48e-10	CD6/CD3E/CD28/TNFSF8/CCL5/CORO1A/RPS3/HLA-DPB1/PTPRC/ZAP70/HLA-DPA1/HLA-E/RAC2/SASH3/TNFRSF1B/PTPN6	16
GO:0046651	lymphocyte proliferation	19/168	288/18723	1.38e-11	1.76e-09	1.43e-09	CD6/CD3E/LEF1/CD28/TNFSF8/CCL5/IKZF3/CORO1A/RPS3/HLA-DPB1/RASGRP1/PTPRC/ZAP70/HLA-DPA1/HLA-E/RAC2/SASH3/TNFRSF1B/PTPN6	19
GO:0032943	mononuclear cell proliferation	19/168	291/18723	1.65e-11	2.01e-09	1.63e-09	CD6/CD3E/LEF1/CD28/TNFSF8/CCL5/IKZF3/CORO1A/RPS3/HLA-DPB1/RASGRP1/PTPRC/ZAP70/HLA-DPA1/HLA-E/RAC2/SASH3/TNFRSF1B/PTPN6	19
GO:0045058	T cell selection	10/168	50/18723	1.95e-11	2.26e-09	1.83e-09	CD3D/CD3G/CD4/CD3E/BCL11B/CD28/CCR7/LY9/PTPRC/ZAP70	10
GO:0050670	regulation of lymphocyte proliferation	17/168	225/18723	2.06e-11	2.28e-09	1.85e-09	CD6/CD3E/CD28/TNFSF8/CCL5/IKZF3/CORO1A/RPS3/HLA-DPB1/PTPRC/ZAP70/HLA-DPA1/HLA-E/RAC2/SASH3/TNFRSF1B/PTPN6	17
GO:0032944	regulation of mononuclear cell proliferation	17/168	227/18723	2.37e-11	2.52e-09	2.04e-09	CD6/CD3E/CD28/TNFSF8/CCL5/IKZF3/CORO1A/RPS3/HLA-DPB1/PTPRC/ZAP70/HLA-DPA1/HLA-E/RAC2/SASH3/TNFRSF1B/PTPN6	17
GO:0050851	antigen receptor-mediated signaling pathway	17/168	240/18723	5.71e-11	5.83e-09	4.73e-09	CD3E/TRAT1/SH2D1A/LCK/CD28/FYB1/CCR7/TRBC2/LAPTM5/RPS3/HLA-DPB1/BTN3A2/PTPRC/ZAP70/SKAP1/TRBC1/PTPN6	17
GO:0070661	leukocyte proliferation	19/168	318/18723	7.63e-11	7.46e-09	6.06e-09	CD6/CD3E/LEF1/CD28/TNFSF8/CCL5/IKZF3/CORO1A/RPS3/HLA-DPB1/RASGRP1/PTPRC/ZAP70/HLA-DPA1/HLA-E/RAC2/SASH3/TNFRSF1B/PTPN6	19
GO:0070663	regulation of leukocyte proliferation	17/168	245/18723	7.9e-11	7.46e-09	6.06e-09	CD6/CD3E/CD28/TNFSF8/CCL5/IKZF3/CORO1A/RPS3/HLA-DPB1/PTPRC/ZAP70/HLA-DPA1/HLA-E/RAC2/SASH3/TNFRSF1B/PTPN6	17
GO:0042102	positive regulation of T cell proliferation	12/168	101/18723	1.1e-10	9.99e-09	8.1e-09	CD6/CD3E/CD28/CCL5/CORO1A/RPS3/HLA-DPB1/PTPRC/ZAP70/HLA-DPA1/HLA-E/SASH3	12
GO:0002443	leukocyte mediated immunity	21/168	440/18723	4.61e-10	4.05e-08	3.29e-08	CD27/CD8A/SH2D1A/CD28/B2M/ITGB2/TRBC2/CORO1A/HLA-DPB1/RASGRP1/BTN3A2/PTPRC/HLA-DPA1/HLA-E/RAC2/SASH3/TNFRSF1B/WDR1/TRBC1/CTSC/PTPN6	21
GO:0045061	thymic T cell selection	7/168	22/18723	6.29e-10	5.35e-08	4.34e-08	CD3D/CD3G/CD3E/CD28/CCR7/PTPRC/ZAP70	7
GO:0002429	immune response-activating cell surface receptor signaling pathway	17/168	291/18723	1.13e-09	9.03e-08	7.32e-08	CD3E/TRAT1/SH2D1A/LCK/CD28/FYB1/CCR7/TRBC2/LAPTM5/RPS3/HLA-DPB1/BTN3A2/PTPRC/ZAP70/SKAP1/TRBC1/PTPN6	17
GO:0002757	immune response-activating signal transduction	17/168	291/18723	1.13e-09	9.03e-08	7.32e-08	CD3E/TRAT1/SH2D1A/LCK/CD28/FYB1/CCR7/TRBC2/LAPTM5/RPS3/HLA-DPB1/BTN3A2/PTPRC/ZAP70/SKAP1/TRBC1/PTPN6	17
GO:0001819	positive regulation of cytokine production	21/168	467/18723	1.35e-09	1.04e-07	8.45e-08	CD6/CD4/CD3E/CD28/B2M/CCR7/CD2/LAPTM5/RPS3/LY9/HLA-DPB1/RASGRP1/HMGB2/SOD1/BTN3A2/PTPRC/IL16/HLA-DPA1/HLA-E/SASH3/HSP90AA1	21
GO:0002449	lymphocyte mediated immunity	18/168	350/18723	2.73e-09	2.05e-07	1.66e-07	CD27/CD8A/SH2D1A/CD28/B2M/TRBC2/CORO1A/HLA-DPB1/RASGRP1/BTN3A2/PTPRC/HLA-DPA1/HLA-E/SASH3/TNFRSF1B/TRBC1/CTSC/PTPN6	18
GO:0002460	adaptive immune response based on somatic recombination of immune receptors built from immunoglobulin superfamily domains	18/168	356/18723	3.56e-09	2.6e-07	2.11e-07	CD27/CD4/CD8A/LEF1/CD28/B2M/TRBC2/LY9/HLA-DPB1/BTN3A2/PTPRC/HLA-DPA1/HLA-E/SASH3/TNFRSF1B/TRBC1/CTSC/PTPN6	18
GO:0002768	immune response-regulating cell surface receptor signaling pathway	17/168	315/18723	3.75e-09	2.66e-07	2.16e-07	CD3E/TRAT1/SH2D1A/LCK/CD28/FYB1/CCR7/TRBC2/LAPTM5/RPS3/HLA-DPB1/BTN3A2/PTPRC/ZAP70/SKAP1/TRBC1/PTPN6	17
GO:0050671	positive regulation of lymphocyte proliferation	12/168	137/18723	3.87e-09	2.67e-07	2.17e-07	CD6/CD3E/CD28/CCL5/CORO1A/RPS3/HLA-DPB1/PTPRC/ZAP70/HLA-DPA1/HLA-E/SASH3	12
GO:0032946	positive regulation of mononuclear cell proliferation	12/168	138/18723	4.21e-09	2.82e-07	2.29e-07	CD6/CD3E/CD28/CCL5/CORO1A/RPS3/HLA-DPB1/PTPRC/ZAP70/HLA-DPA1/HLA-E/SASH3	12
GO:1903706	regulation of hemopoiesis	18/168	367/18723	5.74e-09	3.75e-07	3.04e-07	CD27/CD4/LEF1/CD28/B2M/IKZF3/CD2/CAMK4/RASGRP1/HMGB2/SOD1/PTPRC/ZAP70/RHOH/GPR171/HCLS1/SASH3/PTPN6	18
GO:0045619	regulation of lymphocyte differentiation	13/168	174/18723	5.97e-09	3.81e-07	3.09e-07	CD27/LEF1/CD28/IKZF3/CD2/CAMK4/RASGRP1/SOD1/PTPRC/ZAP70/RHOH/SASH3/PTPN6	13
GO:0002253	activation of immune response	18/168	375/18723	8.02e-09	4.99e-07	4.05e-07	CD3E/TRAT1/SH2D1A/LCK/CD28/FYB1/CCR7/TRBC2/LAPTM5/RPS3/HLA-DPB1/BTN3A2/PTPRC/ZAP70/SKAP1/HSP90AA1/TRBC1/PTPN6	18
GO:0070665	positive regulation of leukocyte proliferation	12/168	150/18723	1.09e-08	6.6e-07	5.35e-07	CD6/CD3E/CD28/CCL5/CORO1A/RPS3/HLA-DPB1/PTPRC/ZAP70/HLA-DPA1/HLA-E/SASH3	12
GO:0032970	regulation of actin filament-based process	18/168	397/18723	1.93e-08	1.15e-06	9.32e-07	CNN2/COTL1/CCR7/S1PR1/BIN1/TMSB10/CORO1A/ARHGDIB/ADD3/RHOH/HCLS1/RAC2/ARPC5/CAPZB/ACTG1/WDR1/CYFIP2/RHOB	18
GO:0045060	negative thymic T cell selection	5/168	11/18723	2.42e-08	1.41e-06	1.14e-06	CD3E/CD28/CCR7/PTPRC/ZAP70	5
GO:0032956	regulation of actin cytoskeleton organization	17/168	358/18723	2.5e-08	1.42e-06	1.15e-06	COTL1/CCR7/S1PR1/BIN1/TMSB10/CORO1A/ARHGDIB/ADD3/RHOH/HCLS1/RAC2/ARPC5/CAPZB/ACTG1/WDR1/CYFIP2/RHOB	17
GO:0043368	positive T cell selection	7/168	37/18723	3.39e-08	1.86e-06	1.51e-06	CD3D/CD3G/CD3E/BCL11B/LY9/PTPRC/ZAP70	7
GO:1902105	regulation of leukocyte differentiation	15/168	279/18723	3.42e-08	1.86e-06	1.51e-06	CD27/CD4/LEF1/CD28/IKZF3/CD2/CAMK4/RASGRP1/SOD1/PTPRC/ZAP70/RHOH/HCLS1/SASH3/PTPN6	15
GO:0043383	negative T cell selection	5/168	12/18723	4.12e-08	2.19e-06	1.78e-06	CD3E/CD28/CCR7/PTPRC/ZAP70	5
GO:0042113	B cell activation	16/168	334/18723	5.84e-08	3.04e-06	2.47e-06	CD27/LEF1/CD28/IKZF3/CMTM7/TRBC2/LAPTM5/TBC1D10C/RASGRP1/PTPRC/ITM2A/ZAP70/SASH3/LGALS1/TRBC1/PTPN6	16
GO:1902903	regulation of supramolecular fiber organization	17/168	383/18723	6.67e-08	3.41e-06	2.76e-06	COTL1/CCR7/S1PR1/BIN1/TMSB10/CORO1A/RPS3/ADD3/PFDN5/NIN/HCLS1/ARPC5/CAPZB/ACTG1/WDR1/CYFIP2/HSPA8	17
GO:0050856	regulation of T cell receptor signaling pathway	7/168	41/18723	7.19e-08	3.6e-06	2.92e-06	TRAT1/SH2D1A/LCK/CCR7/LAPTM5/RPS3/PTPN6	7
GO:0045580	regulation of T cell differentiation	11/168	146/18723	8.41e-08	4.13e-06	3.35e-06	CD27/LEF1/CD28/CD2/CAMK4/RASGRP1/SOD1/PTPRC/ZAP70/RHOH/SASH3	11
GO:0050854	regulation of antigen receptor-mediated signaling pathway	8/168	63/18723	9.05e-08	4.36e-06	3.54e-06	TRAT1/SH2D1A/LCK/CCR7/LAPTM5/RPS3/PTPRC/PTPN6	8
GO:0007015	actin filament organization	18/168	442/18723	9.84e-08	4.65e-06	3.77e-06	ACTN1/COTL1/CCR7/S1PR1/BIN1/TMSB10/ARHGAP25/CORO1A/ADD3/RHOH/HCLS1/RAC2/ARPC5/CAPZB/ACTG1/WDR1/CYFIP2/RHOB	18
GO:0045059	positive thymic T cell selection	5/168	14/18723	1.03e-07	4.77e-06	3.87e-06	CD3D/CD3G/CD3E/PTPRC/ZAP70	5
GO:0032271	regulation of protein polymerization	13/168	233/18723	1.9e-07	8.64e-06	7.01e-06	COTL1/CCR7/BIN1/TMSB10/CORO1A/RPS3/ADD3/NIN/HCLS1/ARPC5/CAPZB/HSP90AA1/CYFIP2	13
GO:0032743	positive regulation of interleukin-2 production	6/168	34/18723	5.21e-07	2.33e-05	1.89e-05	CD4/CD3E/CD28/RPS3/PTPRC/SASH3	6
GO:0032609	interferon-gamma production	9/168	112/18723	7.58e-07	3.28e-05	2.66e-05	CD3E/CCR7/CD2/LAPTM5/HLA-DPB1/RASGRP1/BTN3A2/HLA-DPA1/SASH3	9
GO:0032649	regulation of interferon-gamma production	9/168	112/18723	7.58e-07	3.28e-05	2.66e-05	CD3E/CCR7/CD2/LAPTM5/HLA-DPB1/RASGRP1/BTN3A2/HLA-DPA1/SASH3	9
GO:0046641	positive regulation of alpha-beta T cell proliferation	5/168	21/18723	9.93e-07	4.22e-05	3.43e-05	CD3E/CD28/PTPRC/ZAP70/HLA-E	5
GO:0008064	regulation of actin polymerization or depolymerization	11/168	188/18723	1.07e-06	4.49e-05	3.64e-05	COTL1/CCR7/BIN1/TMSB10/CORO1A/ADD3/HCLS1/ARPC5/CAPZB/WDR1/CYFIP2	11
GO:0002764	immune response-regulating signaling pathway	17/168	468/18723	1.12e-06	4.58e-05	3.71e-05	CD3E/TRAT1/SH2D1A/LCK/CD28/FYB1/CCR7/TRBC2/LAPTM5/RPS3/HLA-DPB1/BTN3A2/PTPRC/ZAP70/SKAP1/TRBC1/PTPN6	17
GO:0030832	regulation of actin filament length	11/168	189/18723	1.13e-06	4.58e-05	3.71e-05	COTL1/CCR7/BIN1/TMSB10/CORO1A/ADD3/HCLS1/ARPC5/CAPZB/WDR1/CYFIP2	11
GO:0032623	interleukin-2 production	7/168	62/18723	1.34e-06	5.27e-05	4.27e-05	CD4/CD3E/CD28/LAPTM5/RPS3/PTPRC/SASH3	7
GO:0032663	regulation of interleukin-2 production	7/168	62/18723	1.34e-06	5.27e-05	4.27e-05	CD4/CD3E/CD28/LAPTM5/RPS3/PTPRC/SASH3	7
GO:0110053	regulation of actin filament organization	13/168	278/18723	1.41e-06	5.44e-05	4.41e-05	COTL1/CCR7/S1PR1/BIN1/TMSB10/CORO1A/ADD3/HCLS1/ARPC5/CAPZB/ACTG1/WDR1/CYFIP2	13
GO:0046631	alpha-beta T cell activation	10/168	156/18723	1.47e-06	5.6e-05	4.54e-05	CD3E/LEF1/BCL11B/CD28/TNFSF8/LY9/PTPRC/ZAP70/HLA-E/SASH3	10
GO:0043254	regulation of protein-containing complex assembly	16/168	428/18723	1.62e-06	6.08e-05	4.93e-05	COTL1/CCR7/BIN1/TMSB10/CORO1A/RPS3/ADD3/RPL13A/SKAP1/NIN/HCLS1/ARPC5/CAPZB/HSP90AA1/CYFIP2/HSPA8	16
GO:0031295	T cell costimulation	6/168	44/18723	2.54e-06	9.39e-05	7.62e-05	CD3E/LCK/CD28/CCR7/LGALS1/PTPN6	6
GO:0051258	protein polymerization	13/168	297/18723	2.92e-06	0.000106541	8.64e-05	COTL1/CCR7/BIN1/TMSB10/CORO1A/RPS3/ADD3/NIN/HCLS1/ARPC5/CAPZB/HSP90AA1/CYFIP2	13
GO:0050857	positive regulation of antigen receptor-mediated signaling pathway	5/168	26/18723	3.09e-06	0.000111229	9.02e-05	TRAT1/LCK/CCR7/RPS3/PTPRC	5
GO:0031294	lymphocyte costimulation	6/168	46/18723	3.32e-06	0.000117709	9.55e-05	CD3E/LCK/CD28/CCR7/LGALS1/PTPN6	6
GO:0030833	regulation of actin filament polymerization	10/168	172/18723	3.55e-06	0.000124127	0.000100709	COTL1/CCR7/BIN1/TMSB10/CORO1A/ADD3/HCLS1/ARPC5/CAPZB/CYFIP2	10
GO:0032729	positive regulation of interferon-gamma production	7/168	72/18723	3.73e-06	0.000128573	0.000104316	CD3E/CD2/HLA-DPB1/RASGRP1/BTN3A2/HLA-DPA1/SASH3	7
GO:0006909	phagocytosis	13/168	308/18723	4.35e-06	0.000147959	0.000120044	CNN2/SIRPG/ITGB2/TRBC2/ARHGAP25/CORO1A/SOD1/PTPRC/RHOH/CDC42SE2/RAC2/BIN2/TRBC1	13
GO:0008154	actin polymerization or depolymerization	11/168	218/18723	4.52e-06	0.000151868	0.000123216	COTL1/CCR7/BIN1/TMSB10/CORO1A/ADD3/HCLS1/ARPC5/CAPZB/WDR1/CYFIP2	11
GO:0019882	antigen processing and presentation	8/168	106/18723	5.08e-06	0.000168493	0.000136704	CD8A/B2M/CCR7/HLA-DPB1/PSMB8/HLA-DPA1/HLA-E/PSME1	8
GO:0002819	regulation of adaptive immune response	10/168	183/18723	6.17e-06	0.00020101	0.000163087	CD4/CD28/B2M/PTPRC/CD48/SKAP1/HLA-E/SASH3/TNFRSF1B/PTPN6	10
GO:0002456	T cell mediated immunity	8/168	109/18723	6.26e-06	0.00020101	0.000163087	CD8A/B2M/BTN3A2/PTPRC/HLA-E/SASH3/TNFRSF1B/CTSC	8
GO:0050900	leukocyte migration	14/168	369/18723	6.3e-06	0.00020101	0.000163087	LCK/CCL5/CCR7/SELL/S1PR1/ITGB2/CORO1A/SELPLG/RIPOR2/ZAP70/RHOH/IL16/RAC2/WDR1	14
GO:0002703	regulation of leukocyte mediated immunity	11/168	226/18723	6.38e-06	0.00020101	0.000163087	SH2D1A/CD28/B2M/ITGB2/RASGRP1/PTPRC/HLA-E/RAC2/SASH3/TNFRSF1B/PTPN6	11
GO:0030041	actin filament polymerization	10/168	191/18723	8.99e-06	0.000279776	0.000226992	COTL1/CCR7/BIN1/TMSB10/CORO1A/ADD3/HCLS1/ARPC5/CAPZB/CYFIP2	10
GO:0050862	positive regulation of T cell receptor signaling pathway	4/168	16/18723	1.05e-05	0.000314916	0.000255503	TRAT1/LCK/CCR7/RPS3	4
GO:0008360	regulation of cell shape	9/168	154/18723	1.06e-05	0.000314916	0.000255503	ITGB2/CORO1A/MYL12A/ARHGAP15/RHOH/CDC42SE2/RAC2/WDR1/RHOB	9
GO:0032633	interleukin-4 production	5/168	33/18723	1.06e-05	0.000314916	0.000255503	CD3E/LEF1/CD28/HLA-E/SASH3	5
GO:0032673	regulation of interleukin-4 production	5/168	33/18723	1.06e-05	0.000314916	0.000255503	CD3E/LEF1/CD28/HLA-E/SASH3	5
GO:0050864	regulation of B cell activation	10/168	198/18723	1.23e-05	0.000354683	0.000287766	CD27/CD28/IKZF3/TRBC2/LAPTM5/TBC1D10C/PTPRC/SASH3/TRBC1/PTPN6	10
GO:1902107	positive regulation of leukocyte differentiation	9/168	157/18723	1.24e-05	0.000354683	0.000287766	CD27/CD4/LEF1/RASGRP1/PTPRC/ZAP70/RHOH/HCLS1/SASH3	9
GO:1903708	positive regulation of hemopoiesis	9/168	157/18723	1.24e-05	0.000354683	0.000287766	CD27/CD4/LEF1/RASGRP1/PTPRC/ZAP70/RHOH/HCLS1/SASH3	9
GO:0046640	regulation of alpha-beta T cell proliferation	5/168	35/18723	1.43e-05	0.000405679	0.000329142	CD3E/CD28/PTPRC/ZAP70/HLA-E	5
GO:0001909	leukocyte mediated cytotoxicity	8/168	124/18723	1.62e-05	0.000454043	0.000368381	SH2D1A/B2M/CORO1A/RASGRP1/PTPRC/HLA-E/CTSC/PTPN6	8
GO:0045582	positive regulation of T cell differentiation	7/168	91/18723	1.78e-05	0.00049266	0.000399712	CD27/LEF1/RASGRP1/PTPRC/ZAP70/RHOH/SASH3	7
GO:0016064	immunoglobulin mediated immune response	10/168	207/18723	1.81e-05	0.00049703	0.000403258	CD27/CD28/B2M/TRBC2/HLA-DPB1/PTPRC/HLA-DPA1/HLA-E/TRBC1/PTPN6	10
GO:0019724	B cell mediated immunity	10/168	210/18723	2.05e-05	0.000556709	0.000451677	CD27/CD28/B2M/TRBC2/HLA-DPB1/PTPRC/HLA-DPA1/HLA-E/TRBC1/PTPN6	10
GO:0002706	regulation of lymphocyte mediated immunity	9/168	168/18723	2.12e-05	0.000570813	0.00046312	SH2D1A/CD28/B2M/RASGRP1/PTPRC/HLA-E/SASH3/TNFRSF1B/PTPN6	9
GO:0046633	alpha-beta T cell proliferation	5/168	38/18723	2.16e-05	0.000575409	0.00046685	CD3E/CD28/PTPRC/ZAP70/HLA-E	5
GO:0007163	establishment or maintenance of cell polarity	10/168	218/18723	2.83e-05	0.000739757	0.000600191	CD3G/CCR7/RIPOR2/ACTB/RHOH/RAC2/ARPC5/WDR1/HSP90AA1/RHOB	10
GO:0002705	positive regulation of leukocyte mediated immunity	8/168	134/18723	2.84e-05	0.000739757	0.000600191	SH2D1A/CD28/B2M/ITGB2/RASGRP1/PTPRC/HLA-E/SASH3	8
GO:0046635	positive regulation of alpha-beta T cell activation	6/168	67/18723	3.03e-05	0.000780744	0.000633445	CD3E/CD28/PTPRC/ZAP70/HLA-E/SASH3	6
GO:0032103	positive regulation of response to external stimulus	14/168	427/18723	3.22e-05	0.000820569	0.000665756	SH2D1A/CD28/CCL5/CCR7/S1PR1/NLRC5/RIPOR2/RASGRP1/HMGB2/IL16/HLA-E/RAC2/HSP90AA1/CTSC	14
GO:0033630	positive regulation of cell adhesion mediated by integrin	4/168	21/18723	3.32e-05	0.000839566	0.000681169	CD3E/CCL5/SKAP1/PTPN6	4
GO:0002274	myeloid leukocyte activation	10/168	223/18723	3.43e-05	0.000857672	0.000695859	CCL5/CST7/ITGB2/CD2/CAMK4/RASGRP1/PTPRC/RHOH/RAC2/CTSC	10
GO:0045621	positive regulation of lymphocyte differentiation	7/168	104/18723	4.23e-05	0.00104765	0.000849993	CD27/LEF1/RASGRP1/PTPRC/ZAP70/RHOH/SASH3	7
GO:0031349	positive regulation of defense response	11/168	278/18723	4.37e-05	0.00107282	0.000870417	SH2D1A/CD28/CCL5/CCR7/NLRC5/RASGRP1/HMGB2/IL16/HLA-E/HSP90AA1/CTSC	11
GO:0002699	positive regulation of immune effector process	10/168	235/18723	5.34e-05	0.00128534	0.00104284	SH2D1A/CD28/B2M/ITGB2/LAPTM5/RASGRP1/PTPRC/HLA-E/RAC2/SASH3	10
GO:0002437	inflammatory response to antigenic stimulus	6/168	74/18723	5.34e-05	0.00128534	0.00104284	CD6/CD28/CCR7/RASGRP1/HMGB2/HLA-E	6
GO:0002181	cytoplasmic translation	8/168	148/18723	5.78e-05	0.00136595	0.00110824	RPS3/CNBP/RPL13A/RPS14/RPS25/PKM/RPL21/EIF3H	8
GO:0002697	regulation of immune effector process	12/168	339/18723	5.78e-05	0.00136595	0.00110824	SH2D1A/CD28/B2M/ITGB2/LAPTM5/RASGRP1/PTPRC/HLA-E/RAC2/SASH3/TNFRSF1B/PTPN6	12
GO:0019884	antigen processing and presentation of exogenous antigen	5/168	47/18723	6.2e-05	0.00145107	0.0011773	B2M/HLA-DPB1/HLA-DPA1/HLA-E/PSME1	5
GO:0014066	regulation of phosphatidylinositol 3-kinase signaling	7/168	111/18723	6.41e-05	0.00148824	0.00120746	CD28/CCL5/RASGRP1/HCST/HCLS1/PIK3IP1/PTPN6	7
GO:0002200	somatic diversification of immune receptors	6/168	77/18723	6.68e-05	0.00153652	0.00124664	LEF1/BCL11B/CD28/HMGB2/SAMHD1/PTPRC	6
GO:0002821	positive regulation of adaptive immune response	7/168	112/18723	6.79e-05	0.00154228	0.00125131	CD4/CD28/B2M/PTPRC/SKAP1/HLA-E/SASH3	7
GO:0032753	positive regulation of interleukin-4 production	4/168	25/18723	6.83e-05	0.00154228	0.00125131	CD3E/CD28/HLA-E/SASH3	4
GO:0002708	positive regulation of lymphocyte mediated immunity	7/168	113/18723	7.19e-05	0.00160863	0.00130514	SH2D1A/CD28/B2M/RASGRP1/PTPRC/HLA-E/SASH3	7
GO:0033632	regulation of cell-cell adhesion mediated by integrin	3/168	11/18723	0.000111058	0.00246452	0.00199955	CD3E/CCL5/SKAP1	3
GO:0060326	cell chemotaxis	11/168	310/18723	0.000115724	0.00254137	0.00206191	LEF1/CCL5/CCR7/S1PR1/ITGB2/CORO1A/RIPOR2/HMGB2/IL16/RAC2/BIN2	11
GO:1990266	neutrophil migration	7/168	122/18723	0.000116513	0.00254137	0.00206191	CCL5/CCR7/ITGB2/RIPOR2/RHOH/RAC2/WDR1	7
GO:0051651	maintenance of location in cell	9/168	214/18723	0.000138569	0.00299686	0.00243145	CD4/LCK/CCR7/RASA3/TMSB10/CORO1A/PTPRC/FTL/PTPN6	9
GO:0002822	regulation of adaptive immune response based on somatic recombination of immune receptors built from immunoglobulin superfamily domains	8/168	168/18723	0.000140079	0.00300405	0.00243729	CD4/CD28/B2M/PTPRC/HLA-E/SASH3/TNFRSF1B/PTPN6	8
GO:0001912	positive regulation of leukocyte mediated cytotoxicity	5/168	56/18723	0.000144619	0.00307556	0.00249531	SH2D1A/B2M/RASGRP1/PTPRC/HLA-E	5
GO:0002863	positive regulation of inflammatory response to antigenic stimulus	3/168	12/18723	0.000147102	0.00310251	0.00251717	CD28/CCR7/HLA-E	3
GO:0006911	phagocytosis, engulfment	7/168	127/18723	0.000149722	0.0031319	0.00254102	ITGB2/TRBC2/ARHGAP25/RHOH/RAC2/BIN2/TRBC1	7
GO:0045088	regulation of innate immune response	9/168	218/18723	0.000159297	0.0032816	0.00266247	SH2D1A/CCL5/NLRC5/RASGRP1/HMGB2/SAMHD1/HLA-E/HSP90AA1/PTPN6	9
GO:0034109	homotypic cell-cell adhesion	6/168	90/18723	0.000159451	0.0032816	0.00266247	CCL5/ACTB/MYL12A/ACTG1/LGALS1/PTPN6	6
GO:0030099	myeloid cell differentiation	12/168	381/18723	0.000173638	0.00354499	0.00287617	CD4/LEF1/ACTN1/B2M/CCR7/CAMK4/HMGB2/RPS14/GPR171/HCLS1/WDR1/PTPN6	12
GO:0045089	positive regulation of innate immune response	7/168	131/18723	0.000181484	0.00367578	0.00298229	SH2D1A/CCL5/NLRC5/RASGRP1/HMGB2/HLA-E/HSP90AA1	7
GO:0050850	positive regulation of calcium-mediated signaling	4/168	32/18723	0.000184858	0.00371463	0.00301381	CD4/CD3E/TRAT1/ZAP70	4
GO:0002366	leukocyte activation involved in immune response	10/168	275/18723	0.000194726	0.00388235	0.00314989	LEF1/CD28/ITGB2/CORO1A/LY9/RASGRP1/PTPRC/ITM2A/RAC2/LGALS1	10
GO:0034113	heterotypic cell-cell adhesion	5/168	61/18723	0.000217254	0.00429372	0.00348365	LCK/ITGB2/CD2/PTPRC/SKAP1	5
GO:0002263	cell activation involved in immune response	10/168	279/18723	0.000218724	0.00429372	0.00348365	LEF1/CD28/ITGB2/CORO1A/LY9/RASGRP1/PTPRC/ITM2A/RAC2/LGALS1	10
GO:0099024	plasma membrane invagination	7/168	136/18723	0.000228628	0.00445388	0.00361358	ITGB2/TRBC2/ARHGAP25/RHOH/RAC2/BIN2/TRBC1	7
GO:0007265	Ras protein signal transduction	11/168	337/18723	0.000239124	0.00462307	0.00375086	GRAP2/RASA3/RIPOR2/RASGRP1/LPAR6/ARHGDIB/RHOH/CDC42SE2/DOK2/RAC2/RHOB	11
GO:0032273	positive regulation of protein polymerization	7/168	138/18723	0.000250048	0.00479792	0.00389272	CCR7/BIN1/CORO1A/RPS3/NIN/ARPC5/HSP90AA1	7
GO:0031343	positive regulation of cell killing	5/168	63/18723	0.000253007	0.00481846	0.00390938	SH2D1A/B2M/RASGRP1/PTPRC/HLA-E	5
GO:0030183	B cell differentiation	7/168	141/18723	0.000285183	0.00539101	0.00437392	CD27/IKZF3/CMTM7/PTPRC/ITM2A/LGALS1/PTPN6	7
GO:0001906	cell killing	8/168	188/18723	0.000301652	0.00566042	0.00459249	SH2D1A/B2M/CORO1A/RASGRP1/PTPRC/HLA-E/CTSC/PTPN6	8
GO:0043087	regulation of GTPase activity	11/168	348/18723	0.000314547	0.00573849	0.00465583	CCL5/CCR7/S1PR1/RASA3/ARHGAP25/TBC1D10C/RIPOR2/RASGRP1/SOD1/ARHGAP15/RGS10	11
GO:0002562	somatic diversification of immune receptors via germline recombination within a single locus	5/168	66/18723	0.000314807	0.00573849	0.00465583	LEF1/BCL11B/CD28/HMGB2/PTPRC	5
GO:0016444	somatic cell DNA recombination	5/168	66/18723	0.000314807	0.00573849	0.00465583	LEF1/BCL11B/CD28/HMGB2/PTPRC	5
GO:0050918	positive chemotaxis	5/168	66/18723	0.000314807	0.00573849	0.00465583	CCL5/S1PR1/CORO1A/HMGB2/IL16	5
GO:0010324	membrane invagination	7/168	144/18723	0.000324181	0.00582613	0.00472694	ITGB2/TRBC2/ARHGAP25/RHOH/RAC2/BIN2/TRBC1	7
GO:0014065	phosphatidylinositol 3-kinase signaling	7/168	144/18723	0.000324181	0.00582613	0.00472694	CD28/CCL5/RASGRP1/HCST/HCLS1/PIK3IP1/PTPN6	7
GO:0046634	regulation of alpha-beta T cell activation	6/168	104/18723	0.000350528	0.00625558	0.00507537	CD3E/CD28/PTPRC/ZAP70/HLA-E/SASH3	6
GO:0042267	natural killer cell mediated cytotoxicity	5/168	68/18723	0.000361941	0.00628824	0.00510187	SH2D1A/CORO1A/RASGRP1/HLA-E/PTPN6	5
GO:0002478	antigen processing and presentation of exogenous peptide antigen	4/168	38/18723	0.000363899	0.00628824	0.00510187	B2M/HLA-DPB1/HLA-DPA1/HLA-E	4
GO:0002399	MHC class II protein complex assembly	3/168	16/18723	0.000364678	0.00628824	0.00510187	B2M/HLA-DPB1/HLA-DPA1	3
GO:0002503	peptide antigen assembly with MHC class II protein complex	3/168	16/18723	0.000364678	0.00628824	0.00510187	B2M/HLA-DPB1/HLA-DPA1	3
GO:0033631	cell-cell adhesion mediated by integrin	3/168	16/18723	0.000364678	0.00628824	0.00510187	CD3E/CCL5/SKAP1	3
GO:0097530	granulocyte migration	7/168	148/18723	0.000382719	0.00655502	0.00531832	CCL5/CCR7/ITGB2/RIPOR2/RHOH/RAC2/WDR1	7
GO:0002824	positive regulation of adaptive immune response based on somatic recombination of immune receptors built from immunoglobulin superfamily domains	6/168	107/18723	0.000408377	0.00694785	0.00563703	CD4/CD28/B2M/PTPRC/HLA-E/SASH3	6
GO:0002381	immunoglobulin production involved in immunoglobulin-mediated immune response	5/168	70/18723	0.000414225	0.00700067	0.00567989	CD28/B2M/HLA-DPB1/PTPRC/HLA-DPA1	5
GO:0033151	V(D)J recombination	3/168	17/18723	0.000439912	0.00736274	0.00597365	LEF1/BCL11B/HMGB2	3
GO:0002228	natural killer cell mediated immunity	5/168	71/18723	0.000442408	0.00736274	0.00597365	SH2D1A/CORO1A/RASGRP1/HLA-E/PTPN6	5
GO:0150077	regulation of neuroinflammatory response	4/168	40/18723	0.000444303	0.00736274	0.00597365	CST7/PTPRC/TNFRSF1B/CTSC	4
GO:0033627	cell adhesion mediated by integrin	5/168	72/18723	0.000472014	0.00777147	0.00630527	CD3E/CCL5/ITGB2/SKAP1/PTPN6	5
GO:0002440	production of molecular mediator of immune response	10/168	308/18723	0.00047847	0.00782729	0.00635055	CD28/B2M/LAPTM5/HLA-DPB1/SAMHD1/PTPRC/HLA-DPA1/HLA-E/SASH3/TNFRSF1B	10
GO:0019722	calcium-mediated signaling	8/168	202/18723	0.000487316	0.00787606	0.00639013	CD4/CD3E/TRAT1/CCR7/TBC1D10C/RCAN3/PTPRC/ZAP70	8
GO:1902622	regulation of neutrophil migration	4/168	41/18723	0.000488918	0.00787606	0.00639013	CCR7/RIPOR2/RHOH/RAC2	4
GO:0022604	regulation of cell morphogenesis	10/168	309/18723	0.000490711	0.00787606	0.00639013	ITGB2/CORO1A/MYL12A/ARHGAP15/RHOH/CDC42SE2/RAC2/CAPZB/WDR1/RHOB	10
GO:0050848	regulation of calcium-mediated signaling	5/168	73/18723	0.000503086	0.00802423	0.00651033	CD4/CD3E/TRAT1/TBC1D10C/ZAP70	5
GO:0046632	alpha-beta T cell differentiation	6/168	112/18723	0.000521092	0.00821062	0.00666156	LEF1/BCL11B/TNFSF8/LY9/ZAP70/SASH3	6
GO:0002501	peptide antigen assembly with MHC protein complex	3/168	18/18723	0.000524424	0.00821062	0.00666156	B2M/HLA-DPB1/HLA-DPA1	3
GO:0150079	negative regulation of neuroinflammatory response	3/168	18/18723	0.000524424	0.00821062	0.00666156	CST7/PTPRC/TNFRSF1B	3
GO:0051209	release of sequestered calcium ion into cytosol	6/168	115/18723	0.000599498	0.00932877	0.00756875	LCK/CCR7/RASA3/CORO1A/PTPRC/PTPN6	6
GO:0002396	MHC protein complex assembly	3/168	19/18723	0.000618662	0.00939778	0.00762474	B2M/HLA-DPB1/HLA-DPA1	3
GO:0030220	platelet formation	3/168	19/18723	0.000618662	0.00939778	0.00762474	ACTN1/WDR1/PTPN6	3
GO:0036344	platelet morphogenesis	3/168	19/18723	0.000618662	0.00939778	0.00762474	ACTN1/WDR1/PTPN6	3
GO:1903978	regulation of microglial cell activation	3/168	19/18723	0.000618662	0.00939778	0.00762474	CST7/PTPRC/CTSC	3
GO:0051283	negative regulation of sequestering of calcium ion	6/168	116/18723	0.00062757	0.00947669	0.00768876	LCK/CCR7/RASA3/CORO1A/PTPRC/PTPN6	6
GO:0150076	neuroinflammatory response	4/168	44/18723	0.000641837	0.0096351	0.00781729	CST7/PTPRC/TNFRSF1B/CTSC	4
GO:0002702	positive regulation of production of molecular mediator of immune response	6/168	117/18723	0.000656652	0.00979986	0.00795097	CD28/B2M/LAPTM5/PTPRC/HLA-E/SASH3	6
GO:0006457	protein folding	8/168	212/18723	0.000669701	0.0099365	0.00806182	B2M/PFDN5/CCT3/ERP29/DNAJB1/HSP90AA1/NUDC/HSPA8	8

## Sheet: ILC1_c2
	ID	Description	GeneRatio	BgRatio	pvalue	p.adjust	qvalue	geneID	Count
GO:0002181	GO:0002181	cytoplasmic translation	56/146	148/18723	8.94673e-83	2.12127e-79	1.77616e-79	RPL23/RPL27A/RPS11/RPS29/RPS20/RPS6/RPL38/RPS16/RPL31/RPL37A/RPLP2/RPS10/RPS27A/RPL7/RPL4/RPL27/RPL37/RPL13/RPL41/RPLP1/RPL34/RPS12/RPL23A/RPL30/UBA52/RPS24/RPS9/RPL39/RPL32/RPS28/RPS2/RPL15/RPL26/RPL11/RPS21/RPS18/RPS15A/RPL35/RPL5/RPS19/RPS25/RPS14/RPL10A/RPS8/RPS23/RPL19/RPL35A/RPS13/RPS4X/RPL3/RPS3/RPS15/RPS5/EIF4B/TMA7/RPL14	56
GO:0042254	GO:0042254	ribosome biogenesis	23/146	299/18723	1.30489e-16	1.54694e-13	1.29527e-13	RPS6/RPL38/RPS16/RPL7/RPL27/RPL23A/RPS24/RPS28/RPL26/RPL11/RPS21/RPL35/RPL5/RPS19/RPS25/RPS14/RPL10A/RPS8/RPL35A/RPL3/RPS15/RPS5/RPL14	23
GO:0006364	GO:0006364	rRNA processing	19/146	225/18723	1.27588e-14	1.00837e-11	8.44317e-12	RPS6/RPS16/RPL7/RPL27/RPS24/RPS28/RPL26/RPL11/RPS21/RPL35/RPL5/RPS19/RPS25/RPS14/RPL10A/RPS8/RPL35A/RPS15/RPL14	19
GO:0022613	GO:0022613	ribonucleoprotein complex biogenesis	25/146	463/18723	2.10657e-14	1.24867e-11	1.04553e-11	RPS6/RPL38/RPS16/RPL7/RPL27/RPL23A/RPS24/RPS28/RPL26/RPL11/RPS21/RPL35/RPL5/RPS19/RPS25/RPS14/RPL10A/RPS8/RPL35A/CELF2/RPL3/RPS15/RPS5/EIF4B/RPL14	25
GO:0016072	GO:0016072	rRNA metabolic process	19/146	236/18723	3.05348e-14	1.44796e-11	1.21239e-11	RPS6/RPS16/RPL7/RPL27/RPS24/RPS28/RPL26/RPL11/RPS21/RPL35/RPL5/RPS19/RPS25/RPS14/RPL10A/RPS8/RPL35A/RPS15/RPL14	19
GO:0042274	GO:0042274	ribosomal small subunit biogenesis	12/146	73/18723	3.91098e-13	1.54549e-10	1.29405e-10	RPS6/RPL38/RPS16/RPS24/RPS28/RPS21/RPS19/RPS25/RPS14/RPS8/RPS15/RPS5	12
GO:0042273	GO:0042273	ribosomal large subunit biogenesis	11/146	72/18723	8.91039e-12	3.01808e-09	2.52707e-09	RPL38/RPL7/RPL23A/RPL26/RPL11/RPL35/RPL5/RPL10A/RPL35A/RPL3/RPL14	11
GO:0042255	GO:0042255	ribosome assembly	10/146	61/18723	3.91074e-11	1.15905e-08	9.70482e-09	RPL38/RPL23A/RPS28/RPL11/RPL5/RPS19/RPS14/RPL3/RPS15/RPS5	10
GO:1904667	GO:1904667	negative regulation of ubiquitin protein ligase activity	6/146	12/18723	1.80276e-10	4.74927e-08	3.97661e-08	RPL23/RPS20/RPL37/RPL11/RPL5/RPS15	6
GO:0034470	GO:0034470	ncRNA processing	19/146	395/18723	2.60479e-10	6.17597e-08	5.1712e-08	RPS6/RPS16/RPL7/RPL27/RPS24/RPS28/RPL26/RPL11/RPS21/RPL35/RPL5/RPS19/RPS25/RPS14/RPL10A/RPS8/RPL35A/RPS15/RPL14	19
GO:0000028	GO:0000028	ribosomal small subunit assembly	6/146	19/18723	5.06069e-09	9.99908e-07	8.37234e-07	RPL38/RPS28/RPS19/RPS14/RPS15/RPS5	6
GO:0051444	GO:0051444	negative regulation of ubiquitin-protein transferase activity	6/146	19/18723	5.06069e-09	9.99908e-07	8.37234e-07	RPL23/RPS20/RPL37/RPL11/RPL5/RPS15	6
GO:0034660	GO:0034660	ncRNA metabolic process	19/146	485/18723	7.74518e-09	1.4126e-06	1.18279e-06	RPS6/RPS16/RPL7/RPL27/RPS24/RPS28/RPL26/RPL11/RPS21/RPL35/RPL5/RPS19/RPS25/RPS14/RPL10A/RPS8/RPL35A/RPS15/RPL14	19
GO:0031397	GO:0031397	negative regulation of protein ubiquitination	9/146	83/18723	1.67459e-08	2.83604e-06	2.37465e-06	RPL23/RPS20/RPL37/PPIA/RPL11/FYN/RPL5/RPS3/RPS15	9
GO:1904666	GO:1904666	regulation of ubiquitin protein ligase activity	6/146	23/18723	1.83511e-08	2.9007e-06	2.42879e-06	RPL23/RPS20/RPL37/RPL11/RPL5/RPS15	6
GO:0001911	GO:0001911	negative regulation of leukocyte mediated cytotoxicity	6/146	24/18723	2.43115e-08	3.60266e-06	3.01655e-06	HLA-B/HLA-A/KLRD1/IL7R/HLA-E/HLA-F	6
GO:1901798	GO:1901798	positive regulation of signal transduction by p53 class mediator	6/146	25/18723	3.17841e-08	4.43294e-06	3.71175e-06	RPL23/RPS20/RPL37/RPL26/RPL11/RPS15	6
GO:1903321	GO:1903321	negative regulation of protein modification by small protein conjugation or removal	9/146	95/18723	5.53047e-08	7.28486e-06	6.09969e-06	RPL23/RPS20/RPL37/PPIA/RPL11/FYN/RPL5/RPS3/RPS15	9
GO:0031342	GO:0031342	negative regulation of cell killing	6/146	28/18723	6.63236e-08	8.27648e-06	6.92999e-06	HLA-B/HLA-A/KLRD1/IL7R/HLA-E/HLA-F	6
GO:0019885	GO:0019885	antigen processing and presentation of endogenous peptide antigen via MHC class I	5/146	17/18723	1.54461e-07	1.7898e-05	1.49862e-05	HLA-B/HLA-A/HLA-C/HLA-E/HLA-F	5
GO:0022618	GO:0022618	ribonucleoprotein complex assembly	12/146	220/18723	1.58523e-07	1.7898e-05	1.49862e-05	RPL38/RPL23A/RPS28/RPL11/RPL5/RPS19/RPS14/CELF2/RPL3/RPS15/RPS5/EIF4B	12
GO:0051438	GO:0051438	regulation of ubiquitin-protein transferase activity	7/146	53/18723	1.73286e-07	1.86755e-05	1.56372e-05	RPL23/RPS20/RPL37/RPS2/RPL11/RPL5/RPS15	7
GO:0140694	GO:0140694	non-membrane-bounded organelle assembly	15/146	367/18723	1.88681e-07	1.94505e-05	1.62861e-05	RPL38/RPL23A/RPS28/RPL11/RPL5/RPS19/RPS14/RPS23/CFLAR/GOLGA8B/RPL3/RPS3/RPS15/RPS5/GSN	15
GO:0045953	GO:0045953	negative regulation of natural killer cell mediated cytotoxicity	5/146	18/18723	2.12529e-07	2.0289e-05	1.69882e-05	HLA-B/HLA-A/KLRD1/HLA-E/HLA-F	5
GO:0042542	GO:0042542	response to hydrogen peroxide	10/146	146/18723	2.18566e-07	2.0289e-05	1.69882e-05	JUN/FYN/DUSP1/PTK2B/KLF2/AREG/RPS3/TXNIP/RACK1/ETS1	10
GO:0071826	GO:0071826	ribonucleoprotein complex subunit organization	12/146	227/18723	2.22486e-07	2.0289e-05	1.69882e-05	RPL38/RPL23A/RPS28/RPL11/RPL5/RPS19/RPS14/CELF2/RPL3/RPS15/RPS5/EIF4B	12
GO:0002483	GO:0002483	antigen processing and presentation of endogenous peptide antigen	5/146	19/18723	2.86625e-07	2.4271e-05	2.03224e-05	HLA-B/HLA-A/HLA-C/HLA-E/HLA-F	5
GO:0002716	GO:0002716	negative regulation of natural killer cell mediated immunity	5/146	19/18723	2.86625e-07	2.4271e-05	2.03224e-05	HLA-B/HLA-A/KLRD1/HLA-E/HLA-F	5
GO:0001914	GO:0001914	regulation of T cell mediated cytotoxicity	6/146	39/18723	5.35231e-07	4.37598e-05	3.66405e-05	HLA-B/HLA-A/KLRD1/IL7R/HLA-E/HLA-F	6
GO:0006417	GO:0006417	regulation of translation	16/146	468/18723	7.93402e-07	6.27052e-05	5.25037e-05	RPL38/PABPC1/RPS9/ZFP36L2/RPL26/RPL5/HNRNPD/RPS14/PTK2B/RPS6KA3/RPS4X/RPS3/EIF4B/DNAJC3/RACK1/EIF1	16
GO:0009612	GO:0009612	response to mechanical stimulus	11/146	216/18723	1.04729e-06	8.01005e-05	6.7069e-05	JUND/FOSB/JUN/FYN/CXCR4/PTK2B/NFKBIA/TXNIP/GSN/ETS1/IRF1	11
GO:0045088	GO:0045088	regulation of innate immune response	11/146	218/18723	1.14653e-06	8.49504e-05	7.11298e-05	HLA-B/HLA-A/KLRD1/TYROBP/TXK/FYN/RPS19/HLA-E/HLA-F/MAVS/IRF1	11
GO:0019883	GO:0019883	antigen processing and presentation of endogenous antigen	5/146	26/18723	1.55169e-06	0.000111486	9.33486e-05	HLA-B/HLA-A/HLA-C/HLA-E/HLA-F	5
GO:0000027	GO:0000027	ribosomal large subunit assembly	5/146	27/18723	1.89242e-06	0.000131969	0.000110499	RPL38/RPL23A/RPL11/RPL5/RPL3	5
GO:0001913	GO:0001913	T cell mediated cytotoxicity	6/146	49/18723	2.1516e-06	0.000145756	0.000122043	HLA-B/HLA-A/KLRD1/IL7R/HLA-E/HLA-F	6
GO:0001906	GO:0001906	cell killing	10/146	188/18723	2.22869e-06	0.000146707	0.000122839	HLA-B/HLA-A/KLRD1/GNLY/RPL30/TYROBP/IL7R/RPS19/HLA-E/HLA-F	10
GO:0002474	GO:0002474	antigen processing and presentation of peptide antigen via MHC class I	5/146	28/18723	2.2894e-06	0.000146707	0.000122839	HLA-B/HLA-A/HLA-C/HLA-E/HLA-F	5
GO:0030490	GO:0030490	maturation of SSU-rRNA	6/146	50/18723	2.42939e-06	0.000151581	0.000126921	RPS16/RPS28/RPS21/RPS19/RPS14/RPS8	6
GO:0002707	GO:0002707	negative regulation of lymphocyte mediated immunity	6/146	53/18723	3.44297e-06	0.000209315	0.000175262	HLA-B/HLA-A/KLRD1/IL7R/HLA-E/HLA-F	6
GO:0001910	GO:0001910	regulation of leukocyte mediated cytotoxicity	7/146	82/18723	3.54006e-06	0.000209837	0.000175699	HLA-B/HLA-A/KLRD1/TYROBP/IL7R/HLA-E/HLA-F	7
GO:0002709	GO:0002709	regulation of T cell mediated immunity	7/146	85/18723	4.50748e-06	0.000260664	0.000218257	HLA-B/CD81/HLA-A/KLRD1/IL7R/HLA-E/HLA-F	7
GO:0001912	GO:0001912	positive regulation of leukocyte mediated cytotoxicity	6/146	56/18723	4.7767e-06	0.000269656	0.000225786	HLA-B/HLA-A/KLRD1/TYROBP/HLA-E/HLA-F	6
GO:0031396	GO:0031396	regulation of protein ubiquitination	10/146	210/18723	5.98043e-06	0.000329758	0.00027611	RPL23/RPS20/RPL37/RPS2/PPIA/RPL11/FYN/RPL5/RPS3/RPS15	10
GO:0032103	GO:0032103	positive regulation of response to external stimulus	14/146	427/18723	6.50581e-06	0.000350575	0.00029354	CD81/TMSB4X/KLRD1/TYROBP/TXK/FYN/RPS19/CXCR4/HLA-E/PTK2B/HLA-F/MAVS/NFKBIA/ETS1	14
GO:1901796	GO:1901796	regulation of signal transduction by p53 class mediator	7/146	93/18723	8.21395e-06	0.000432784	0.000362374	RPL23/RPS20/RPL37/RPL26/RPL11/RPL5/RPS15	7
GO:0045089	GO:0045089	positive regulation of innate immune response	8/146	131/18723	8.69499e-06	0.00044817	0.000375258	KLRD1/TYROBP/TXK/FYN/RPS19/HLA-E/HLA-F/MAVS	8
GO:0002704	GO:0002704	negative regulation of leukocyte mediated immunity	6/146	63/18723	9.55807e-06	0.000462128	0.000386944	HLA-B/HLA-A/KLRD1/IL7R/HLA-E/HLA-F	6
GO:0031343	GO:0031343	positive regulation of cell killing	6/146	63/18723	9.55807e-06	0.000462128	0.000386944	HLA-B/HLA-A/KLRD1/TYROBP/HLA-E/HLA-F	6
GO:0000462	GO:0000462	maturation of SSU-rRNA from tricistronic rRNA transcript (SSU-rRNA, 5.8S rRNA, LSU-rRNA)	5/146	37/18723	9.59664e-06	0.000462128	0.000386944	RPS16/RPS21/RPS19/RPS14/RPS8	5
GO:0000302	GO:0000302	response to reactive oxygen species	10/146	222/18723	9.74542e-06	0.000462128	0.000386944	JUN/FYN/DUSP1/PTK2B/KLF2/AREG/RPS3/TXNIP/RACK1/ETS1	10
GO:0002705	GO:0002705	positive regulation of leukocyte mediated immunity	8/146	134/18723	1.02701e-05	0.000477458	0.00039978	HLA-B/CD81/HLA-A/KLRD1/TYROBP/HLA-E/HLA-F/MAVS	8
GO:0045727	GO:0045727	positive regulation of translation	8/146	136/18723	1.14486e-05	0.00052201	0.000437084	PABPC1/RPS9/RPL26/RPL5/HNRNPD/PTK2B/RPS4X/DNAJC3	8
GO:0031349	GO:0031349	positive regulation of defense response	11/146	278/18723	1.18154e-05	0.000528574	0.00044258	CD81/KLRD1/TYROBP/TXK/FYN/RPS19/HLA-E/HLA-F/MAVS/NFKBIA/ETS1	11
GO:0031341	GO:0031341	regulation of cell killing	7/146	99/18723	1.24151e-05	0.000545114	0.00045643	HLA-B/HLA-A/KLRD1/TYROBP/IL7R/HLA-E/HLA-F	7
GO:0045824	GO:0045824	negative regulation of innate immune response	6/146	71/18723	1.91421e-05	0.0008252	0.000690948	HLA-B/HLA-A/KLRD1/RPS19/HLA-E/HLA-F	6
GO:1903320	GO:1903320	regulation of protein modification by small protein conjugation or removal	10/146	242/18723	2.05829e-05	0.000871464	0.000729686	RPL23/RPS20/RPL37/RPS2/PPIA/RPL11/FYN/RPL5/RPS3/RPS15	10
GO:0042269	GO:0042269	regulation of natural killer cell mediated cytotoxicity	5/146	44/18723	2.28833e-05	0.000951864	0.000797006	HLA-B/HLA-A/KLRD1/HLA-E/HLA-F	5
GO:0002456	GO:0002456	T cell mediated immunity	7/146	109/18723	2.329e-05	0.00095208	0.000797187	HLA-B/CD81/HLA-A/KLRD1/IL7R/HLA-E/HLA-F	7
GO:0002698	GO:0002698	negative regulation of immune effector process	7/146	110/18723	2.47123e-05	0.000993098	0.000831531	HLA-B/HLA-A/KLRD1/IL7R/RPS19/HLA-E/HLA-F	7
GO:0002715	GO:0002715	regulation of natural killer cell mediated immunity	5/146	48/18723	3.51875e-05	0.00139049	0.00116428	HLA-B/HLA-A/KLRD1/HLA-E/HLA-F	5
GO:1903901	GO:1903901	negative regulation of viral life cycle	4/146	25/18723	3.95138e-05	0.00153586	0.00128599	IFITM2/PPIA/IFITM3/GSN	4
GO:0034250	GO:0034250	positive regulation of cellular amide metabolic process	8/146	162/18723	4.05136e-05	0.00154932	0.00129726	PABPC1/RPS9/RPL26/RPL5/HNRNPD/PTK2B/RPS4X/DNAJC3	8
GO:0030099	GO:0030099	myeloid cell differentiation	12/146	381/18723	4.51343e-05	0.00169863	0.00142228	RPS6/CD81/JUN/TYROBP/RPS19/RPS14/PTK2B/KLF2/IKZF1/RBPJ/NFKBIA/ETS1	12
GO:0002833	GO:0002833	positive regulation of response to biotic stimulus	8/146	168/18723	5.24446e-05	0.00191513	0.00160356	KLRD1/TYROBP/TXK/FYN/RPS19/HLA-E/HLA-F/MAVS	8
GO:0002831	GO:0002831	regulation of response to biotic stimulus	11/146	327/18723	5.25025e-05	0.00191513	0.00160356	HLA-B/HLA-A/KLRD1/TYROBP/TXK/FYN/RPS19/HLA-E/HLA-F/MAVS/IRF1	11
GO:0001909	GO:0001909	leukocyte mediated cytotoxicity	7/146	124/18723	5.33924e-05	0.00191808	0.00160603	HLA-B/HLA-A/KLRD1/TYROBP/IL7R/HLA-E/HLA-F	7
GO:0034101	GO:0034101	erythrocyte homeostasis	7/146	129/18723	6.86373e-05	0.00242894	0.00203378	RPS6/RPS24/RPS19/RPS14/KLF2/IKZF1/ETS1	7
GO:0002703	GO:0002703	regulation of leukocyte mediated immunity	9/146	226/18723	7.16524e-05	0.00248828	0.00208347	HLA-B/CD81/HLA-A/KLRD1/TYROBP/IL7R/HLA-E/HLA-F/MAVS	9
GO:0001916	GO:0001916	positive regulation of T cell mediated cytotoxicity	4/146	29/18723	7.24131e-05	0.00248828	0.00208347	HLA-B/HLA-A/HLA-E/HLA-F	4
GO:0002711	GO:0002711	positive regulation of T cell mediated immunity	5/146	56/18723	7.46648e-05	0.002529	0.00211756	HLA-B/CD81/HLA-A/HLA-E/HLA-F	5
GO:0046651	GO:0046651	lymphocyte proliferation	10/146	288/18723	8.92446e-05	0.00298027	0.00249541	RPS6/CD81/HLA-A/TYROBP/IL7R/FYN/HLA-E/RPS3/TMIGD2/IRF1	10
GO:0002819	GO:0002819	regulation of adaptive immune response	8/146	183/18723	9.55912e-05	0.00311462	0.0026079	HLA-B/CD81/HLA-A/KLRD1/IL7R/HLA-E/HLA-F/IRF1	8
GO:0002699	GO:0002699	positive regulation of immune effector process	9/146	235/18723	9.6584e-05	0.00311462	0.0026079	HLA-B/CD81/HLA-A/KLRD1/TYROBP/RPS19/HLA-E/HLA-F/MAVS	9
GO:0032943	GO:0032943	mononuclear cell proliferation	10/146	291/18723	9.72086e-05	0.00311462	0.0026079	RPS6/CD81/HLA-A/TYROBP/IL7R/FYN/HLA-E/RPS3/TMIGD2/IRF1	10
GO:0042110	GO:0042110	T cell activation	13/146	487/18723	0.000116263	0.00367547	0.00307751	RPS6/CD81/HLA-A/TCF7/ZFP36L2/IL7R/FYN/HLA-E/RPS3/GSN/CD7/TMIGD2/IRF1	13
GO:0048002	GO:0048002	antigen processing and presentation of peptide antigen	5/146	62/18723	0.000121832	0.00380083	0.00318248	HLA-B/HLA-A/HLA-C/HLA-E/HLA-F	5
GO:0050777	GO:0050777	negative regulation of immune response	8/146	194/18723	0.000143196	0.00435279	0.00364464	HLA-B/HLA-A/KLRD1/IL7R/FYN/RPS19/HLA-E/HLA-F	8
GO:1901654	GO:1901654	response to ketone	8/146	194/18723	0.000143196	0.00435279	0.00364464	FOSB/RPL27/HNRNPD/DUSP1/CFLAR/KLF2/TXNIP/CALM1	8
GO:0009615	GO:0009615	response to virus	11/146	367/18723	0.000146083	0.00438434	0.00367105	TPT1/IFITM2/CFL1/TRIM56/RPS15A/IFITM3/CXCR4/ITGAX/MAVS/DNAJC3/IRF1	11
GO:0002720	GO:0002720	positive regulation of cytokine production involved in immune response	5/146	65/18723	0.000152625	0.0044776	0.00374914	CD81/HLA-A/HLA-E/HLA-F/MAVS	5
GO:0046640	GO:0046640	regulation of alpha-beta T cell proliferation	4/146	35/18723	0.000153946	0.0044776	0.00374914	CD81/HLA-A/HLA-E/IRF1	4
GO:0002683	GO:0002683	negative regulation of immune system process	12/146	434/18723	0.000154856	0.0044776	0.00374914	HLA-B/HLA-A/KLRD1/TYROBP/IL7R/TSC22D3/FYN/RPS19/HLA-E/DUSP1/HLA-F/IRF1	12
GO:0097305	GO:0097305	response to alcohol	9/146	253/18723	0.000168616	0.00475677	0.00398289	FOSB/RPL27/RPL15/FYN/HNRNPD/RPL10A/PTK2B/KLF2/CALM1	9
GO:0051592	GO:0051592	response to calcium ion	7/146	149/18723	0.000169199	0.00475677	0.00398289	JUND/FOSB/HNRNPD/DUSP1/PTK2B/TXNIP/CALM1	7
GO:0042098	GO:0042098	T cell proliferation	8/146	199/18723	0.00017053	0.00475677	0.00398289	RPS6/CD81/HLA-A/FYN/HLA-E/RPS3/TMIGD2/IRF1	8
GO:0042267	GO:0042267	natural killer cell mediated cytotoxicity	5/146	68/18723	0.000189043	0.00521186	0.00436395	HLA-B/HLA-A/KLRD1/HLA-E/HLA-F	5
GO:0070661	GO:0070661	leukocyte proliferation	10/146	318/18723	0.000200228	0.00544191	0.00455656	RPS6/CD81/HLA-A/TYROBP/IL7R/FYN/HLA-E/RPS3/TMIGD2/IRF1	10
GO:0002832	GO:0002832	negative regulation of response to biotic stimulus	6/146	108/18723	0.000201977	0.00544191	0.00455656	HLA-B/HLA-A/KLRD1/RPS19/HLA-E/HLA-F	6
GO:0046633	GO:0046633	alpha-beta T cell proliferation	4/146	38/18723	0.000213126	0.00567777	0.00475406	CD81/HLA-A/HLA-E/IRF1	4
GO:0002228	GO:0002228	natural killer cell mediated immunity	5/146	71/18723	0.000231739	0.00608223	0.00509271	HLA-B/HLA-A/KLRD1/HLA-E/HLA-F	5
GO:0002262	GO:0002262	myeloid cell homeostasis	7/146	157/18723	0.000233439	0.00608223	0.00509271	RPS6/RPS24/RPS19/RPS14/KLF2/IKZF1/ETS1	7
GO:0002708	GO:0002708	positive regulation of lymphocyte mediated immunity	6/146	113/18723	0.000258325	0.00659584	0.00552277	HLA-B/CD81/HLA-A/KLRD1/HLA-E/HLA-F	6
GO:0051348	GO:0051348	negative regulation of transferase activity	9/146	268/18723	0.000258715	0.00659584	0.00552277	RPL23/RPS20/RPL37/PPIA/RPL11/RPL5/DUSP1/RPS15/RACK1	9
GO:0048872	GO:0048872	homeostasis of number of cells	9/146	272/18723	0.000288544	0.00727805	0.00609399	RPS6/RPS24/IL7R/TSC22D3/RPS19/RPS14/KLF2/IKZF1/ETS1	9
GO:0072331	GO:0072331	signal transduction by p53 class mediator	7/146	163/18723	0.000293477	0.00732456	0.00613293	RPL23/RPS20/RPL37/RPL26/RPL11/RPL5/RPS15	7
GO:0050792	GO:0050792	regulation of viral process	7/146	164/18723	0.00030459	0.00752275	0.00629888	IFITM2/PABPC1/PPIA/IFITM3/CXCR4/MAVS/GSN	7
GO:0002697	GO:0002697	regulation of immune effector process	10/146	339/18723	0.000333441	0.0080358	0.00672846	HLA-B/CD81/HLA-A/KLRD1/TYROBP/IL7R/RPS19/HLA-E/HLA-F/MAVS	10
GO:0019221	GO:0019221	cytokine-mediated signaling pathway	12/146	472/18723	0.000333674	0.0080358	0.00672846	IFITM2/TMSB4X/IL7R/TXK/IFITM3/CXCR4/IL2RG/PTK2B/ACTN4/MAVS/NFKBIA/IRF1	12
GO:0031960	GO:0031960	response to corticosteroid	7/146	167/18723	0.000339976	0.0080358	0.00672846	FOSB/RPL27/ZFP36L2/DUSP1/CFLAR/AREG/CALM1	7
GO:0002223	GO:0002223	stimulatory C-type lectin receptor signaling pathway	3/146	18/18723	0.000347839	0.0080358	0.00672846	KLRD1/TYROBP/FYN	3
GO:1990840	GO:1990840	response to lectin	3/146	18/18723	0.000347839	0.0080358	0.00672846	KLRD1/TYROBP/FYN	3
GO:1990858	GO:1990858	cellular response to lectin	3/146	18/18723	0.000347839	0.0080358	0.00672846	KLRD1/TYROBP/FYN	3
GO:0002706	GO:0002706	regulation of lymphocyte mediated immunity	7/146	168/18723	0.000352477	0.0080358	0.00672846	HLA-B/CD81/HLA-A/KLRD1/IL7R/HLA-E/HLA-F	7
GO:0002822	GO:0002822	regulation of adaptive immune response based on somatic recombination of immune receptors built from immunoglobulin superfamily domains	7/146	168/18723	0.000352477	0.0080358	0.00672846	HLA-B/CD81/HLA-A/KLRD1/IL7R/HLA-E/HLA-F	7
GO:0030218	GO:0030218	erythrocyte differentiation	6/146	120/18723	0.000357204	0.008066	0.00675375	RPS6/RPS19/RPS14/KLF2/IKZF1/ETS1	6
GO:0019730	GO:0019730	antimicrobial humoral response	6/146	122/18723	0.000390285	0.00872987	0.00730962	HLA-A/GNLY/RPL30/RPL39/RPS19/HLA-E	6
GO:0002888	GO:0002888	positive regulation of myeloid leukocyte mediated immunity	3/146	19/18723	0.000410704	0.00901647	0.00754959	TYROBP/HLA-E/MAVS	3
GO:2001185	GO:2001185	regulation of CD8-positive, alpha-beta T cell activation	3/146	19/18723	0.000410704	0.00901647	0.00754959	HLA-A/HLA-E/IRF1	3
GO:0016032	GO:0016032	viral process	11/146	415/18723	0.000418386	0.00910086	0.00762024	IFITM2/CD81/PABPC1/CFL1/JUN/PPIA/NCAM1/IFITM3/CXCR4/MAVS/GSN	11
GO:0052126	GO:0052126	movement in host environment	7/146	175/18723	0.000450675	0.0097141	0.00813372	IFITM2/CD81/PPIA/NCAM1/IFITM3/CXCR4/GSN	7
GO:0044403	GO:0044403	biological process involved in symbiotic interaction	9/146	290/18723	0.000460331	0.00983283	0.00823313	IFITM2/CD81/CFL1/JUN/PPIA/NCAM1/IFITM3/CXCR4/GSN	9

## Sheet: ILC2_c1
ID	Description	GeneRatio	BgRatio	pvalue	p.adjust	qvalue	geneID	Count
GO:0042110	T cell activation	19/146	487/18723	8.27806e-09	2.21438e-05	1.94142e-05	LEF1/PAG1/TESPA1/ANXA1/GATA3/SLAMF1/RIPOR2/CD40LG/CD84/IL2RA/APBB1IP/DPP4/B2M/SOS1/ITK/CD48/DDOST/GPR183/RPS3	19
GO:0002181	cytoplasmic translation	11/146	148/18723	2.27468e-08	3.04238e-05	2.66736e-05	RPL3/RPL5/RPL8/EIF3L/CNBP/RPL13A/RPLP0/EIF3D/RPS3/RPL18/EIF3A	11
GO:0018279	protein N-linked glycosylation via asparagine	5/146	23/18723	8.08844e-07	0.000557196	0.000488512	ST6GAL1/RPN1/DDOST/STT3A/RPN2	5
GO:0018196	peptidyl-asparagine modification	5/146	24/18723	1.0153e-06	0.000557196	0.000488512	ST6GAL1/RPN1/DDOST/STT3A/RPN2	5
GO:0050900	leukocyte migration	14/146	369/18723	1.19719e-06	0.000557196	0.000488512	S1PR1/SELL/CD200R1/ANXA1/SELPLG/GATA3/SLAMF1/RIPOR2/PLEC/DPP4/SOS1/ANO6/GPR183/MIF	14
GO:0007159	leukocyte cell-cell adhesion	14/146	371/18723	1.276e-06	0.000557196	0.000488512	LEF1/SELL/PAG1/TESPA1/ANXA1/SELPLG/GATA3/SLAMF1/RIPOR2/CD40LG/IL2RA/DPP4/B2M/RPS3	14
GO:0002683	negative regulation of immune system process	15/146	434/18723	1.56543e-06	0.000557196	0.000488512	A2M/MYC/PAG1/SAMHD1/CD200R1/ANXA1/SLAMF1/RIPOR2/CD84/IL2RA/DPP4/NLRC5/ADAR/MIF/TRIM27	15
GO:0045785	positive regulation of cell adhesion	15/146	437/18723	1.70449e-06	0.000557196	0.000488512	LEF1/ADAM19/TESPA1/ANXA1/S100A10/GATA3/SLAMF1/CD40LG/IL2RA/APBB1IP/DPP4/B2M/FLNA/ARPC2/RPS3	15
GO:0050863	regulation of T cell activation	13/146	329/18723	1.87468e-06	0.000557196	0.000488512	LEF1/PAG1/TESPA1/ANXA1/GATA3/SLAMF1/RIPOR2/CD40LG/IL2RA/DPP4/B2M/SOS1/RPS3	13
GO:0050870	positive regulation of T cell activation	10/146	216/18723	7.66504e-06	0.00200705	0.00175965	LEF1/TESPA1/ANXA1/GATA3/SLAMF1/CD40LG/IL2RA/DPP4/B2M/RPS3	10
GO:0019080	viral gene expression	7/146	94/18723	8.81748e-06	0.00200705	0.00175965	LEF1/ST6GAL1/EIF3L/CANX/EIF3D/TRIM27/EIF3A	7
GO:0022618	ribonucleoprotein complex assembly	10/146	220/18723	9.00357e-06	0.00200705	0.00175965	RPL3/RPL5/EIF3L/RPL13A/RPLP0/DDX1/ADAR/SETX/EIF3D/EIF3A	10
GO:0071826	ribonucleoprotein complex subunit organization	10/146	227/18723	1.18351e-05	0.0024353	0.00213511	RPL3/RPL5/EIF3L/RPL13A/RPLP0/DDX1/ADAR/SETX/EIF3D/EIF3A	10
GO:1903037	regulation of leukocyte cell-cell adhesion	12/146	336/18723	1.31493e-05	0.00251246	0.00220276	LEF1/PAG1/TESPA1/ANXA1/GATA3/SLAMF1/RIPOR2/CD40LG/IL2RA/DPP4/B2M/RPS3	12
GO:0022409	positive regulation of cell-cell adhesion	11/146	284/18723	1.44229e-05	0.00257208	0.00225503	LEF1/ADAM19/TESPA1/ANXA1/GATA3/SLAMF1/CD40LG/IL2RA/DPP4/B2M/RPS3	11
GO:1903039	positive regulation of leukocyte cell-cell adhesion	10/146	239/18723	1.84884e-05	0.00302055	0.00264822	LEF1/TESPA1/ANXA1/GATA3/SLAMF1/CD40LG/IL2RA/DPP4/B2M/RPS3	10
GO:0042542	response to hydrogen peroxide	8/146	146/18723	1.9196e-05	0.00302055	0.00264822	CAPN2/TXNIP/ANXA1/ERN1/LDHA/RACK1/SETX/RPS3	8
GO:0016032	viral process	13/146	415/18723	2.27858e-05	0.00332583	0.00291586	LEF1/SELPLG/SLAMF1/ST6GAL1/LY6E/DPP4/EIF3L/ANO6/CANX/ADAR/EIF3D/TRIM27/EIF3A	13
GO:0071674	mononuclear cell migration	9/146	196/18723	2.36227e-05	0.00332583	0.00291586	S1PR1/CD200R1/ANXA1/GATA3/SLAMF1/RIPOR2/PLEC/ANO6/GPR183	9
GO:0051251	positive regulation of lymphocyte activation	12/146	362/18723	2.74565e-05	0.0036723	0.00321963	LEF1/TESPA1/ANXA1/GATA3/SLAMF1/CD40LG/IL2RA/DPP4/B2M/GPR183/MIF/RPS3	12
GO:0043254	regulation of protein-containing complex assembly	13/146	428/18723	3.13922e-05	0.00393405	0.00344912	TRABD2A/CRBN/ADD3/SPTBN1/CYFIP2/ARPC2/SORL1/CAPG/RPL13A/RACK1/ARF1/RPS3/TRIM27	13
GO:0060326	cell chemotaxis	11/146	310/18723	3.23548e-05	0.00393405	0.00344912	S1PR1/LEF1/ANXA1/SLAMF1/RIPOR2/PLEC/DPP4/BIN2/ANO6/GPR183/MIF	11
GO:0006413	translational initiation	7/146	118/18723	3.88764e-05	0.00452149	0.00396414	TMED2/EIF3L/RPL13A/DDX1/EIF3D/RPS3/EIF3A	7
GO:0022407	regulation of cell-cell adhesion	13/146	448/18723	5.01825e-05	0.00559326	0.0049038	LEF1/PAG1/ADAM19/TESPA1/ANXA1/GATA3/SLAMF1/RIPOR2/CD40LG/IL2RA/DPP4/B2M/RPS3	13
GO:0110053	regulation of actin filament organization	10/146	278/18723	6.65689e-05	0.00712288	0.00624487	S1PR1/S100A10/ADD3/SPTBN1/CYFIP2/FLNA/ARPC2/CAPG/ARF1/TRIM27	10
GO:0001819	positive regulation of cytokine production	13/146	467/18723	7.64476e-05	0.00786528	0.00689576	ANXA1/GATA3/SLAMF1/CD40LG/CD84/B2M/SPTBN1/ITK/SORL1/DDX1/MIF/RPS3/TRIM27	13
GO:0030595	leukocyte chemotaxis	9/146	230/18723	8.19646e-05	0.00812057	0.00711958	S1PR1/ANXA1/SLAMF1/RIPOR2/PLEC/DPP4/ANO6/GPR183/MIF	9
GO:0002696	positive regulation of leukocyte activation	12/146	409/18723	8.88478e-05	0.00848814	0.00744184	LEF1/TESPA1/ANXA1/GATA3/SLAMF1/CD40LG/IL2RA/DPP4/B2M/GPR183/MIF/RPS3	12
GO:0050671	positive regulation of lymphocyte proliferation	7/146	137/18723	0.000100295	0.00925136	0.00811098	ANXA1/SLAMF1/CD40LG/IL2RA/GPR183/MIF/RPS3	7
GO:0032946	positive regulation of mononuclear cell proliferation	7/146	138/18723	0.000104974	0.00931143	0.00816365	ANXA1/SLAMF1/CD40LG/IL2RA/GPR183/MIF/RPS3	7
GO:0050867	positive regulation of cell activation	12/146	420/18723	0.00011406	0.00931143	0.00816365	LEF1/TESPA1/ANXA1/GATA3/SLAMF1/CD40LG/IL2RA/DPP4/B2M/GPR183/MIF/RPS3	12
GO:0042060	wound healing	12/146	422/18723	0.00011925	0.00931143	0.00816365	VCL/ANXA1/CNN2/CD40LG/PLEC/MYL12A/ANXA2/ANXA5/FLNA/TIMP1/ANO6/ANXA6	12
GO:0071353	cellular response to interleukin-4	4/146	33/18723	0.000121775	0.00931143	0.00816365	LEF1/GATA3/RPL3/RPLP0	4
GO:0032623	interleukin-2 production	5/146	62/18723	0.000121832	0.00931143	0.00816365	ANXA1/GATA3/SPTBN1/RPS3/TRIM27	5
GO:0032663	regulation of interleukin-2 production	5/146	62/18723	0.000121832	0.00931143	0.00816365	ANXA1/GATA3/SPTBN1/RPS3/TRIM27	5
GO:1903131	mononuclear cell differentiation	12/146	426/18723	0.000130242	0.00967768	0.00848475	LEF1/MYC/TESPA1/ANXA1/GATA3/SLAMF1/CD40LG/IL2RA/B2M/SOS1/ITK/GPR183	12
GO:0002183	cytoplasmic translational initiation	4/146	34/18723	0.000137179	0.00991767	0.00869516	EIF3L/RPL13A/EIF3D/EIF3A	4

## Sheet: ILC2_c2
ID	Description	GeneRatio	BgRatio	pvalue	p.adjust	qvalue	geneID	Count
GO:0007159	leukocyte cell-cell adhesion	14/169	371/18723	7.18e-06	0.00965575	0.00833339	SELL/B2M/IL2/TESPA1/CD40LG/SLAMF1/ANXA1/LCK/SELPLG/GATA3/CORO1A/SASH3/LAPTM5/FERMT3	14
GO:0030098	lymphocyte differentiation	14/169	374/18723	7.87e-06	0.00965575	0.00833339	FCRL3/B2M/IL2/TESPA1/EGR1/GPR183/MFNG/CD40LG/SLAMF1/ANXA1/LCK/GATA3/SASH3/KLF6	14
GO:0051014	actin filament severing	4/169	16/18723	1.07e-05	0.00965575	0.00833339	GMFG/DSTN/CFL1/GMFB	4
GO:0050854	regulation of antigen receptor-mediated signaling pathway	6/169	63/18723	2.2e-05	0.00994379	0.00858198	FCRL3/TRAT1/TESPA1/LCK/UBASH3A/LAPTM5	6
GO:0050870	positive regulation of T cell activation	10/169	216/18723	2.75e-05	0.00994379	0.00858198	B2M/IL2/TESPA1/CD40LG/SLAMF1/ANXA1/LCK/GATA3/CORO1A/SASH3	10
GO:0050856	regulation of T cell receptor signaling pathway	5/169	41/18723	3.25e-05	0.00994379	0.00858198	TRAT1/TESPA1/LCK/UBASH3A/LAPTM5	5
GO:1903131	mononuclear cell differentiation	14/169	426/18723	3.35e-05	0.00994379	0.00858198	FCRL3/B2M/IL2/TESPA1/EGR1/GPR183/MFNG/CD40LG/SLAMF1/ANXA1/LCK/GATA3/SASH3/KLF6	14
GO:0050671	positive regulation of lymphocyte proliferation	8/169	137/18723	3.48e-05	0.00994379	0.00858198	FCRL3/IL2/GPR183/CD40LG/SLAMF1/ANXA1/CORO1A/SASH3	8
GO:0032946	positive regulation of mononuclear cell proliferation	8/169	138/18723	3.66e-05	0.00994379	0.00858198	FCRL3/IL2/GPR183/CD40LG/SLAMF1/ANXA1/CORO1A/SASH3	8
GO:0042110	T cell activation	15/169	487/18723	3.68e-05	0.00994379	0.00858198	B2M/IL2/TESPA1/EGR1/GPR183/CD84/CD40LG/SLAMF1/ANXA1/LCK/GATA3/CORO1A/SASH3/LAPTM5/LCP1	15
GO:0007159	leukocyte cell-cell adhesion	14/169	371/18723	7.18e-06	0.00965575	0.00833339	SELL/B2M/IL2/TESPA1/CD40LG/SLAMF1/ANXA1/LCK/SELPLG/GATA3/CORO1A/SASH3/LAPTM5/FERMT3	14
GO:0030098	lymphocyte differentiation	14/169	374/18723	7.87e-06	0.00965575	0.00833339	FCRL3/B2M/IL2/TESPA1/EGR1/GPR183/MFNG/CD40LG/SLAMF1/ANXA1/LCK/GATA3/SASH3/KLF6	14
GO:0051014	actin filament severing	4/169	16/18723	1.07e-05	0.00965575	0.00833339	GMFG/DSTN/CFL1/GMFB	4
GO:0050854	regulation of antigen receptor-mediated signaling pathway	6/169	63/18723	2.2e-05	0.00994379	0.00858198	FCRL3/TRAT1/TESPA1/LCK/UBASH3A/LAPTM5	6
GO:0050870	positive regulation of T cell activation	10/169	216/18723	2.75e-05	0.00994379	0.00858198	B2M/IL2/TESPA1/CD40LG/SLAMF1/ANXA1/LCK/GATA3/CORO1A/SASH3	10
GO:0050856	regulation of T cell receptor signaling pathway	5/169	41/18723	3.25e-05	0.00994379	0.00858198	TRAT1/TESPA1/LCK/UBASH3A/LAPTM5	5
GO:1903131	mononuclear cell differentiation	14/169	426/18723	3.35e-05	0.00994379	0.00858198	FCRL3/B2M/IL2/TESPA1/EGR1/GPR183/MFNG/CD40LG/SLAMF1/ANXA1/LCK/GATA3/SASH3/KLF6	14
GO:0050671	positive regulation of lymphocyte proliferation	8/169	137/18723	3.48e-05	0.00994379	0.00858198	FCRL3/IL2/GPR183/CD40LG/SLAMF1/ANXA1/CORO1A/SASH3	8
GO:0032946	positive regulation of mononuclear cell proliferation	8/169	138/18723	3.66e-05	0.00994379	0.00858198	FCRL3/IL2/GPR183/CD40LG/SLAMF1/ANXA1/CORO1A/SASH3	8
GO:0042110	T cell activation	15/169	487/18723	3.68e-05	0.00994379	0.00858198	B2M/IL2/TESPA1/EGR1/GPR183/CD84/CD40LG/SLAMF1/ANXA1/LCK/GATA3/CORO1A/SASH3/LAPTM5/LCP1	15

## Sheet: c-Kit+ ILC2_c1
ID	Description	GeneRatio	BgRatio	pvalue	p.adjust	qvalue	geneID	Count
GO:0002181	cytoplasmic translation	80/486	148/18723	5.46675e-88	2.26979e-84	1.78964e-84	RPS26/RPL36A/RPL10/RPL28/RPL29/RPL32/RPL8/RPL39/RPL41/RPLP1/RPL12/RPS8/RPL9/RPS28/RPS3A/RPL18A/RPL19/RPL34/RPS15/RPL36/RPS13/RPL17/RPL11/RPL18/RPS15A/RPL30/RPS7/RPLP0/RPS12/RPL22/RPS23/RPS27/RPL13/RPL21/RPL35A/RPL7A/RPL14/RPS24/RPL24/RPS14/RPL26/RPS4X/RPS27A/RPS18/RPS19/RPL37/RPS21/RPS25/RPS3/RPS2/RPS5/TMA7/RPLP2/RPSA/RPL35/RPL7/RPL5/RPL13A/RPL10A/RPL37A/RPL23A/UBA52/RPL15/RPS16/RPL38/RPS9/RPS29/…	80
GO:0046034	ATP metabolic process	43/486	277/18723	2.29e-21	4.75405e-18	3.74837e-18	ALDOA/GAPDH/CHCHD10/TMSB4X/COX7C/NDUFV2/UQCRB/COX4I1/DDIT4/CHCHD2/COX6A1/HSPA1A/CYCS/UQCRH/HSPA8/GUK1/UQCR11/TGFB1/NDUFS5/TPI1/NDUFB2/PGK1/COX6C/NDUFA1/COX7A2/LDHA/COX7B/COX8A/NDUFA6/COX5B/ATP1B1/FIS1/NDUFA3/NDUFC2/NDUFB8/UQCRQ/RHOA/COX5A/PARK7/COX6B1/NDUFA4/TSPO/UQCR10	43
GO:0022613	ribonucleoprotein complex biogenesis	54/486	463/18723	1.3687e-20	1.89428e-17	1.49356e-17	RPL10/RPS8/RPS28/RPS15/RPL11/RPS7/RPLP0/RPS27/RPL35A/RPL7A/RPL14/RPS24/RPL24/RPS14/RPL26/RPS19/RPS21/RPS25/RPS5/RPSA/RPL35/RPL7/RPL5/RPL13A/RPL10A/RPL23A/RPS16/RPL38/NPM1/RPS6/SNRPD2/RPL27/RPS17/RPL3/HSP90AB1/HSP90AA1/RAN/NSA2/EIF3K/SNU13/PTGES3/EIF3F/STRAP/EIF3E/NOP10/RSL24D1/RPS27L/TRMT112/EIF2S2/SNRPB/DDX27/ISG20/EIF4A3/SNRPG	54
GO:0042254	ribosome biogenesis	42/486	299/18723	3.23379e-19	3.35667e-16	2.6466e-16	RPL10/RPS8/RPS28/RPS15/RPL11/RPS7/RPLP0/RPS27/RPL35A/RPL7A/RPL14/RPS24/RPL24/RPS14/RPL26/RPS19/RPS21/RPS25/RPS5/RPSA/RPL35/RPL7/RPL5/RPL10A/RPL23A/RPS16/RPL38/NPM1/RPS6/RPL27/RPS17/RPL3/RAN/NSA2/SNU13/NOP10/RSL24D1/RPS27L/TRMT112/DDX27/ISG20/EIF4A3	42
GO:0042773	ATP synthesis coupled electron transport	25/486	95/18723	1.27671e-18	8.83481e-16	6.96589e-16	COX7C/NDUFV2/UQCRB/COX4I1/CHCHD2/COX6A1/CYCS/UQCRH/UQCR11/NDUFS5/NDUFB2/COX6C/NDUFA1/COX7A2/COX8A/NDUFA6/COX5B/NDUFA3/NDUFC2/NDUFB8/UQCRQ/COX5A/PARK7/NDUFA4/UQCR10	25
GO:0042775	mitochondrial ATP synthesis coupled electron transport	25/486	95/18723	1.27671e-18	8.83481e-16	6.96589e-16	COX7C/NDUFV2/UQCRB/COX4I1/CHCHD2/COX6A1/CYCS/UQCRH/UQCR11/NDUFS5/NDUFB2/COX6C/NDUFA1/COX7A2/COX8A/NDUFA6/COX5B/NDUFA3/NDUFC2/NDUFB8/UQCRQ/COX5A/PARK7/NDUFA4/UQCR10	25
GO:0019646	aerobic electron transport chain	24/486	87/18723	1.88289e-18	1.11682e-15	8.8057e-16	COX7C/NDUFV2/UQCRB/COX4I1/COX6A1/CYCS/UQCRH/UQCR11/NDUFS5/NDUFB2/COX6C/NDUFA1/COX7A2/COX8A/NDUFA6/COX5B/NDUFA3/NDUFC2/NDUFB8/UQCRQ/COX5A/PARK7/NDUFA4/UQCR10	24
GO:0022900	electron transport chain	32/486	175/18723	2.3783e-18	1.23434e-15	9.73225e-16	CYBA/COX7C/NDUFV2/UQCRB/COX4I1/CHCHD2/COX6A1/CYCS/UQCRH/FDX1/NDUFA13/UQCR11/NDUFS5/NDUFB2/DEGS1/COX6C/NDUFA1/COX7A2/COX7B/COX8A/UQCRFS1/NDUFA6/COX5B/NDUFA3/NDUFC2/NDUFB8/UQCRQ/COX5A/PARK7/COX6B1/NDUFA4/UQCR10	32
GO:0006119	oxidative phosphorylation	29/486	141/18723	3.3453e-18	1.5433e-15	1.21683e-15	CHCHD10/COX7C/NDUFV2/UQCRB/COX4I1/CHCHD2/COX6A1/CYCS/UQCRH/UQCR11/NDUFS5/NDUFB2/COX6C/NDUFA1/COX7A2/COX7B/COX8A/NDUFA6/COX5B/NDUFA3/NDUFC2/NDUFB8/UQCRQ/RHOA/COX5A/PARK7/COX6B1/NDUFA4/UQCR10	29
GO:0022904	respiratory electron transport chain	26/486	114/18723	1.25082e-17	5.19342e-15	4.09481e-15	COX7C/NDUFV2/UQCRB/COX4I1/CHCHD2/COX6A1/CYCS/UQCRH/UQCR11/NDUFS5/NDUFB2/COX6C/NDUFA1/COX7A2/COX8A/UQCRFS1/NDUFA6/COX5B/NDUFA3/NDUFC2/NDUFB8/UQCRQ/COX5A/PARK7/NDUFA4/UQCR10	26
GO:0009060	aerobic respiration	29/486	189/18723	1.18913e-14	4.48844e-12	3.53895e-12	CHCHD10/COX7C/NDUFV2/UQCRB/COX4I1/CHCHD2/COX6A1/CYCS/UQCRH/UQCR11/NDUFS5/NDUFB2/COX6C/NDUFA1/COX7A2/COX7B/COX8A/NDUFA6/COX5B/NDUFA3/NDUFC2/NDUFB8/UQCRQ/RHOA/COX5A/PARK7/COX6B1/NDUFA4/UQCR10	29
GO:0042273	ribosomal large subunit biogenesis	19/486	72/18723	1.73282e-14	5.99554e-12	4.72724e-12	RPL10/RPL11/RPLP0/RPL35A/RPL7A/RPL14/RPL24/RPL26/RPL35/RPL7/RPL5/RPL10A/RPL23A/RPL38/NPM1/RPL3/NSA2/SNU13/RSL24D1	19
GO:0042274	ribosomal small subunit biogenesis	19/486	73/18723	2.28699e-14	7.30429e-12	5.75914e-12	RPS8/RPS28/RPS15/RPS7/RPS27/RPS24/RPS14/RPS19/RPS21/RPS25/RPS5/RPSA/RPS16/RPL38/NPM1/RPS6/RPS17/SNU13/RPS27L	19
GO:0045333	cellular respiration	31/486	230/18723	5.48974e-14	1.6281e-11	1.28369e-11	CHCHD10/COX7C/NDUFV2/UQCRB/COX4I1/CHCHD2/COX6A1/CYCS/UQCRH/UQCR11/NDUFS5/NDUFB2/COX6C/NDUFA1/PRELID1/COX7A2/COX7B/COX8A/UQCRFS1/NDUFA6/COX5B/NDUFA3/NDUFC2/NDUFB8/UQCRQ/RHOA/COX5A/PARK7/COX6B1/NDUFA4/UQCR10	31
GO:0042255	ribosome assembly	17/486	61/18723	1.56617e-13	4.33515e-11	3.41809e-11	RPL10/RPS28/RPS15/RPL11/RPLP0/RPS27/RPL24/RPS14/RPS19/RPS5/RPSA/RPL5/RPL23A/RPL38/NPM1/RPL3/RPS27L	17
GO:0006091	generation of precursor metabolites and energy	45/486	490/18723	1.86736e-13	4.61127e-11	3.6358e-11	ALDOA/GAPDH/CHCHD10/CYBA/COX7C/NDUFV2/UQCRB/COX4I1/DDIT4/CHCHD2/COX6A1/CYCS/UQCRH/FDX1/NDUFA13/UQCR11/NDUFS5/TPI1/NDUFB2/PGK1/DEGS1/MYC/COX6C/PTGES3/NDUFA1/PRELID1/HMGB1/TKT/COX7A2/LDHA/COX7B/COX8A/UQCRFS1/NDUFA6/COX5B/NDUFA3/NDUFC2/NDUFB8/UQCRQ/RHOA/COX5A/PARK7/COX6B1/NDUFA4/UQCR10	45
GO:0006364	rRNA processing	30/486	225/18723	1.88804e-13	4.61127e-11	3.6358e-11	RPS8/RPS28/RPS15/RPL11/RPS7/RPS27/RPL35A/RPL7A/RPL14/RPS24/RPS14/RPL26/RPS19/RPS21/RPS25/RPL35/RPL7/RPL5/RPL10A/RPS16/RPS6/RPL27/RPS17/NSA2/SNU13/NOP10/TRMT112/DDX27/ISG20/EIF4A3	30
GO:0022618	ribonucleoprotein complex assembly	29/486	220/18723	6.45882e-13	1.46418e-10	1.15444e-10	RPL10/RPS28/RPS15/RPL11/RPLP0/RPS27/RPL24/RPS14/RPS19/RPS5/RPSA/RPL5/RPL13A/RPL23A/RPL38/SNRPD2/RPL3/HSP90AB1/HSP90AA1/EIF3K/SNU13/PTGES3/EIF3F/STRAP/EIF3E/RPS27L/EIF2S2/SNRPB/SNRPG	29
GO:0016072	rRNA metabolic process	30/486	236/18723	6.70023e-13	1.46418e-10	1.15444e-10	RPS8/RPS28/RPS15/RPL11/RPS7/RPS27/RPL35A/RPL7A/RPL14/RPS24/RPS14/RPL26/RPS19/RPS21/RPS25/RPL35/RPL7/RPL5/RPL10A/RPS16/RPS6/RPL27/RPS17/NSA2/SNU13/NOP10/TRMT112/DDX27/ISG20/EIF4A3	30
GO:0071826	ribonucleoprotein complex subunit organization	29/486	227/18723	1.44111e-12	2.99174e-10	2.35887e-10	RPL10/RPS28/RPS15/RPL11/RPLP0/RPS27/RPL24/RPS14/RPS19/RPS5/RPSA/RPL5/RPL13A/RPL23A/RPL38/SNRPD2/RPL3/HSP90AB1/HSP90AA1/EIF3K/SNU13/PTGES3/EIF3F/STRAP/EIF3E/RPS27L/EIF2S2/SNRPB/SNRPG	29
GO:0015980	energy derivation by oxidation of organic compounds	34/486	318/18723	2.86863e-12	5.6717e-10	4.47191e-10	CHCHD10/COX7C/NDUFV2/UQCRB/COX4I1/CHCHD2/COX6A1/CYCS/UQCRH/UQCR11/NDUFS5/NDUFB2/MYC/COX6C/PTGES3/NDUFA1/PRELID1/HMGB1/COX7A2/COX7B/COX8A/UQCRFS1/NDUFA6/COX5B/NDUFA3/NDUFC2/NDUFB8/UQCRQ/RHOA/COX5A/PARK7/COX6B1/NDUFA4/UQCR10	34
GO:0000028	ribosomal small subunit assembly	9/486	19/18723	3.64495e-10	6.87902e-08	5.42383e-08	RPS28/RPS15/RPS27/RPS14/RPS19/RPS5/RPSA/RPL38/RPS27L	9
GO:0097193	intrinsic apoptotic signaling pathway	29/486	288/18723	4.98866e-10	9.00562e-08	7.10057e-08	CRIP1/RPL11/RPS7/RPL26/MIF/RPS3/HINT1/RACK1/TPT1/DDIT4/PPIA/HSPB1/HSPA1A/NDUFA13/CDKN1A/UBB/EIF5A/TNFRSF1B/PLEKHF1/P4HB/FIS1/PTPN1/SOD1/SOD2/PARK7/RPS27L/VDAC2/BCL3/IFI6	29
GO:0006123	mitochondrial electron transport, cytochrome c to oxygen	9/486	21/18723	1.10726e-09	1.91557e-07	1.51035e-07	COX7C/COX4I1/COX6A1/CYCS/COX6C/COX7A2/COX8A/COX5B/COX5A	9
GO:2001242	regulation of intrinsic apoptotic signaling pathway	21/486	164/18723	1.75924e-09	2.92175e-07	2.30368e-07	RPL11/RPS7/RPL26/MIF/RPS3/RACK1/TPT1/PPIA/HSPB1/HSPA1A/NDUFA13/UBB/EIF5A/PLEKHF1/P4HB/FIS1/PTPN1/SOD1/SOD2/PARK7/VDAC2	21
GO:0006605	protein targeting	29/486	314/18723	3.70994e-09	5.92448e-07	4.67121e-07	RPL11/NACA/GABARAP/SEC61B/CHMP4B/TOMM7/HSPD1/HSPA8/NDUFA13/HSP90AA1/HSPA5/SEC61G/ROMO1/SSR2/TOMM22/TOMM20/LAPTM5/SRP14/YWHAZ/UBL5/TOMM5/FIS1/SSR3/VPS37B/PRNP/RAC2/YWHAB/TSPO/SEC62	29
GO:0072594	establishment of protein localization to organelle	34/486	422/18723	5.66989e-09	8.71903e-07	6.8746e-07	LMNA/SEC61B/CHMP4B/TOMM7/HSPD1/HSP90AB1/HSPA8/NDUFA13/HSP90AA1/HSPA5/SEC61G/TGFB1/RAN/ROMO1/CDKN1A/TOMM22/IL10RA/TOMM20/LAPTM5/SRP14/ZC3H12A/UBL5/RALA/CALM1/TOMM5/FIS1/SSR3/VPS37B/RAC2/BCL3/NUTF2/CALM3/TSPO/SEC62	34
GO:0031396	regulation of protein ubiquitination	23/486	210/18723	6.44133e-09	9.55158e-07	7.53103e-07	RPS15/RPL11/RPS7/RPL37/RPS3/RPS2/RPL5/GABARAP/NPM1/ISG15/PPIA/SQSTM1/HSPA1A/RPS20/HSP90AB1/HSP90AA1/HSPA5/PRR7/UBB/LAPTM5/SKP1/PARK7/TSPO	23
GO:0006457	protein folding	23/486	212/18723	7.7289e-09	1.10656e-06	8.72482e-07	PPIB/PFDN5/HSPE1/B2M/PPIA/HSPB1/PDCL3/HSPD1/HSPA1A/HSP90AB1/HSPA8/HSP90B1/HSP90AA1/HSPA5/PTGES3/FKBP4/FKBP8/ST13/P4HB/CALR/WDR83OS/NUDC/TBCA	23
GO:0010950	positive regulation of endopeptidase activity	21/486	179/18723	8.6684e-09	1.19971e-06	9.4592e-07	RPS3/RACK1/HSPE1/PPARG/HSPD1/CYCS/NDUFA13/PRR7/MYC/LAPTM5/PRELID1/HMGB1/AKIRIN2/VSIR/APH1A/ANP32B/PSME1/FIS1/PSME2/RHOA/RPS27L	21
GO:0042110	T cell activation	36/486	487/18723	1.90298e-08	2.54877e-06	2.0096e-06	RPL22/RPS3/HLA-A/SLAMF1/ANXA1/LGALS1/EFNB1/B2M/RPS6/ZFP36L2/GATA3/HSPD1/CD7/RELB/RARA/PRR7/CD48/CCR6/SOCS1/LAPTM5/ZC3H12A/PRELID1/HMGB1/PRDX2/TNFRSF1B/VSIR/CD55/BATF/XCL1/PRNP/SOD1/RHOA/RAC2/NFKBIZ/TNFRSF4/BCL3	36
GO:1903320	regulation of protein modification by small protein conjugation or removal	24/486	242/18723	2.13998e-08	2.77663e-06	2.18926e-06	RPS15/RPL11/RPS7/RPL37/RPS3/RPS2/RPL5/GABARAP/NPM1/ISG15/PPIA/SQSTM1/HSPA1A/RPS20/HSP90AB1/HSP90AA1/HSPA5/PRR7/UBB/LAPTM5/ZC3H12A/SKP1/PARK7/TSPO	24
GO:0031397	negative regulation of protein ubiquitination	14/486	83/18723	2.68919e-08	3.38349e-06	2.66774e-06	RPS15/RPL11/RPS7/RPL37/RPS3/RPL5/ISG15/PPIA/SQSTM1/HSPA1A/RPS20/PRR7/PARK7/TSPO	14
GO:0010952	positive regulation of peptidase activity	21/486	197/18723	4.72722e-08	5.77277e-06	4.5516e-06	RPS3/RACK1/HSPE1/PPARG/HSPD1/CYCS/NDUFA13/PRR7/MYC/LAPTM5/PRELID1/HMGB1/AKIRIN2/VSIR/APH1A/ANP32B/PSME1/FIS1/PSME2/RHOA/RPS27L	21
GO:0034470	ncRNA processing	31/486	395/18723	4.94913e-08	5.87109e-06	4.62911e-06	RPS8/RPS28/RPS15/RPL11/RPS7/RPS27/RPL35A/RPL7A/RPL14/RPS24/RPS14/RPL26/RPS19/RPS21/RPS25/RPL35/RPL7/RPL5/RPL10A/RPS16/RPS6/RPL27/RPS17/NSA2/SNU13/TSEN54/NOP10/TRMT112/DDX27/ISG20/EIF4A3	31
GO:0019058	viral life cycle	27/486	317/18723	7.02331e-08	8.10021e-06	6.38669e-06	RPSA/PPIB/IFITM1/SLAMF1/LGALS1/LY6E/PCBP2/PCBP1/ISG15/CHMP4B/PPIA/HSPA1A/IFITM2/HSP90AB1/HSPA8/CDC42/ZC3H12A/CXCR6/PABPC1/CD55/P4HB/VPS37B/SLC3A2/BSG/TNFRSF4/BST2/ISG20	27
GO:0006417	regulation of translation	34/486	468/18723	7.26466e-08	8.15213e-06	6.42762e-06	RPL10/RPL22/RPS14/RPL26/RPS4X/RPS3/VIM/GAPDH/RPL5/RPL13A/RPL38/RACK1/RPS9/SERP1/NPM1/ZFP36L2/YBX1/EIF1/HSPB1/RARA/EIF3K/RBM8A/EIF5A/MAGOH/ZC3H12A/PABPC1/EEF2/ZFP36/EIF3E/CALR/RHOA/RPS27L/BCL3/EIF4A3	34
GO:0052548	regulation of endopeptidase activity	32/486	432/18723	1.14231e-07	1.24813e-05	9.84096e-06	RPS3/GAPDH/RACK1/HSPE1/PPARG/HSPD1/CSTB/CYCS/NDUFA13/SPOCK2/TIMP1/PRR7/CARD16/MYC/LAPTM5/PRELID1/HMGB1/AKIRIN2/VSIR/ANXA2/APH1A/PAK2/ANP32B/PSME1/FIS1/PRNP/PSME2/RHOA/PARK7/RPS27L/IFI6/BST2	32
GO:0006122	mitochondrial electron transport, ubiquinol to cytochrome c	6/486	11/18723	1.22709e-07	1.30638e-05	1.03003e-05	UQCRB/CYCS/UQCRH/UQCR11/UQCRQ/UQCR10	6
GO:1901798	positive regulation of signal transduction by p53 class mediator	8/486	25/18723	1.42703e-07	1.48126e-05	1.16791e-05	RPS15/RPL11/RPS7/RPL26/RPL37/RPS20/UBB/EIF5A	8
GO:0016032	viral process	31/486	415/18723	1.502e-07	1.50999e-05	1.19056e-05	RPSA/PPIB/IFITM1/SLAMF1/LGALS1/LY6E/PCBP2/PCBP1/ISG15/CHMP4B/PPIA/HSPA1A/IFITM2/HSP90AB1/HSPA8/RAN/CDC42/MGAT2/ZC3H12A/CXCR6/PABPC1/CD55/EIF3F/P4HB/ZFP36/VPS37B/SLC3A2/BSG/TNFRSF4/BST2/ISG20	31
GO:0070585	protein localization to mitochondrion	16/486	125/18723	1.53813e-07	1.50999e-05	1.19056e-05	ISG15/TOMM7/HSPD1/NDUFA13/HSP90AA1/ROMO1/TOMM22/TOMM20/UBL5/RALA/CALM1/TOMM5/FIS1/RAC2/CALM3/TSPO	16
GO:1903321	negative regulation of protein modification by small protein conjugation or removal	14/486	95/18723	1.56381e-07	1.50999e-05	1.19056e-05	RPS15/RPL11/RPS7/RPL37/RPS3/RPL5/ISG15/PPIA/SQSTM1/HSPA1A/RPS20/PRR7/PARK7/TSPO	14
GO:1904667	negative regulation of ubiquitin protein ligase activity	6/486	12/18723	2.40035e-07	2.24832e-05	1.77271e-05	RPS15/RPL11/RPS7/RPL37/RPL5/RPS20	6
GO:2001244	positive regulation of intrinsic apoptotic signaling pathway	11/486	58/18723	2.43676e-07	2.24832e-05	1.77271e-05	RPL11/RPS7/RPL26/RPS3/RACK1/UBB/EIF5A/PLEKHF1/FIS1/SOD1/PARK7	11
GO:0072331	signal transduction by p53 class mediator	18/486	163/18723	2.535e-07	2.28811e-05	1.80408e-05	RPS15/RPL11/RPS7/RPL26/MIF/RPL37/RPL5/HINT1/DDIT4/NPM1/RPS20/CDKN1A/UBB/EIF5A/CDKN1B/BATF/RPS27L/BCL3	18
GO:0000027	ribosomal large subunit assembly	8/486	27/18723	2.79825e-07	2.47199e-05	1.94906e-05	RPL10/RPL11/RPLP0/RPL24/RPL5/RPL23A/RPL38/RPL3	8
GO:0051444	negative regulation of ubiquitin-protein transferase activity	7/486	19/18723	2.92393e-07	2.5292e-05	1.99417e-05	RPS15/RPL11/RPS7/RPL37/RPL5/RPS20/PARK7	7
GO:0072593	reactive oxygen species metabolic process	22/486	239/18723	3.07401e-07	2.60475e-05	2.05374e-05	CYBA/DDIT4/HSPD1/NDUFA13/PRDX1/RAC1/TGFB1/ROMO1/CDKN1A/GADD45A/ZC3H12A/PRDX2/PRDX6/VDAC1/SOD1/RHOA/RAC2/SOD2/PARK7/DCXR/IFI6/TSPO	22
GO:0052547	regulation of peptidase activity	32/486	461/18723	4.90784e-07	4.07547e-05	3.21334e-05	RPS3/GAPDH/RACK1/HSPE1/PPARG/HSPD1/CSTB/CYCS/NDUFA13/SPOCK2/TIMP1/PRR7/CARD16/MYC/LAPTM5/PRELID1/HMGB1/AKIRIN2/VSIR/ANXA2/APH1A/PAK2/ANP32B/PSME1/FIS1/PRNP/PSME2/RHOA/PARK7/RPS27L/IFI6/BST2	32
GO:0072655	establishment of protein localization to mitochondrion	15/486	120/18723	5.13308e-07	4.17893e-05	3.29492e-05	TOMM7/HSPD1/NDUFA13/HSP90AA1/ROMO1/TOMM22/TOMM20/UBL5/RALA/CALM1/TOMM5/FIS1/RAC2/CALM3/TSPO	15
GO:0006120	mitochondrial electron transport, NADH to ubiquinone	10/486	51/18723	6.22827e-07	4.97304e-05	3.92104e-05	NDUFV2/NDUFS5/NDUFB2/NDUFA1/NDUFA6/NDUFA3/NDUFC2/NDUFB8/PARK7/NDUFA4	10
GO:0046631	alpha-beta T cell activation	17/486	156/18723	6.58873e-07	5.16159e-05	4.0697e-05	RPL22/HLA-A/ANXA1/GATA3/RELB/RARA/PRR7/SOCS1/ZC3H12A/HMGB1/VSIR/CD55/BATF/XCL1/RHOA/NFKBIZ/BCL3	17
GO:2001233	regulation of apoptotic signaling pathway	27/486	356/18723	7.17254e-07	5.34925e-05	4.21767e-05	RPL11/RPS7/RPL26/MIF/RPS3/LMNA/RACK1/TPT1/PPIA/HSPB1/HSPA1A/NDUFA13/UBB/SLC25A5/EIF5A/PRELID1/PRDX2/PAK2/PLEKHF1/P4HB/FIS1/PTPN1/SOD1/SOD2/PARK7/VDAC2/IFI6	27
GO:1902600	proton transmembrane transport	17/486	157/18723	7.21479e-07	5.34925e-05	4.21767e-05	TMSB4X/COX4I1/COX6A1/UQCRH/SLC25A5/SLC25A3/COX7B/COX8A/UQCRFS1/COX5B/ATP6V1G1/COX5A/PARK7/COX6B1/NDUFA4/UQCR10/UCP2	17
GO:2000377	regulation of reactive oxygen species metabolic process	17/486	157/18723	7.21479e-07	5.34925e-05	4.21767e-05	CYBA/HSPD1/RAC1/TGFB1/ROMO1/CDKN1A/GADD45A/ZC3H12A/PRDX2/VDAC1/SOD1/RHOA/RAC2/SOD2/PARK7/DCXR/TSPO	17
GO:0032689	negative regulation of interferon-gamma production	9/486	42/18723	1.034e-06	7.53186e-05	5.93857e-05	SLAMF1/GATA3/RARA/LAPTM5/ZC3H12A/HMGB1/VSIR/XCL1/PRNP	9
GO:0006414	translational elongation	10/486	55/18723	1.29916e-06	8.92209e-05	7.03471e-05	EEF1G/RPLP1/EEF1A1/EEF1B2/RPLP2/EEF1D/RACK1/EIF5A/EEF2/EIF4A3	10
GO:0042026	protein refolding	7/486	23/18723	1.29992e-06	8.92209e-05	7.03471e-05	B2M/HSPD1/HSPA1A/HSPA8/HSP90AA1/HSPA5/ST13	7
GO:1904666	regulation of ubiquitin protein ligase activity	7/486	23/18723	1.29992e-06	8.92209e-05	7.03471e-05	RPS15/RPL11/RPS7/RPL37/RPL5/RPS20/SKP1	7
GO:0043280	positive regulation of cysteine-type endopeptidase activity involved in apoptotic process	15/486	129/18723	1.31081e-06	8.92209e-05	7.03471e-05	RPS3/RACK1/HSPE1/PPARG/HSPD1/CYCS/NDUFA13/PRR7/MYC/LAPTM5/HMGB1/ANP32B/FIS1/RHOA/RPS27L	15
GO:0034660	ncRNA metabolic process	32/486	485/18723	1.47839e-06	9.90046e-05	7.80611e-05	RPS8/RPS28/RPS15/RPL11/RPS7/RPS27/RPL35A/RPL7A/RPL14/RPS24/RPS14/RPL26/RPS19/RPS21/RPS25/RPL35/RPL7/RPL5/RPL10A/RPS16/RPS6/RPL27/RPS17/NSA2/SNU13/ZC3H12A/TSEN54/NOP10/TRMT112/DDX27/ISG20/EIF4A3	32
GO:0071353	cellular response to interleukin-4	8/486	33/18723	1.52591e-06	0.000100565	7.92912e-05	RPLP0/GATA3/IL2RG/RPL3/HSP90AB1/HSPA5/TUBA1B/XCL1	8
GO:0045862	positive regulation of proteolysis	27/486	372/18723	1.67331e-06	0.000108556	8.55922e-05	RPS3/RACK1/GABARAP/HSPE1/PPARG/HSPD1/HSPA1A/ELOB/CYCS/SUMO2/NDUFA13/PRR7/MYC/LAPTM5/ZC3H12A/PRELID1/HMGB1/TNFRSF1B/AKIRIN2/VSIR/APH1A/ANP32B/PSME1/FIS1/PSME2/RHOA/RPS27L	27
GO:0050863	regulation of T cell activation	25/486	329/18723	1.78925e-06	0.000113471	8.94675e-05	RPS3/HLA-A/SLAMF1/ANXA1/LGALS1/EFNB1/B2M/GATA3/HSPD1/RARA/SOCS1/LAPTM5/ZC3H12A/PRELID1/HMGB1/PRDX2/TNFRSF1B/VSIR/CD55/XCL1/PRNP/SOD1/RHOA/RAC2/NFKBIZ	25
GO:0010257	NADH dehydrogenase complex assembly	10/486	57/18723	1.83106e-06	0.000113471	8.94675e-05	NDUFA11/NDUFB11/NDUFA13/NDUFS5/NDUFB2/NDUFA1/NDUFA6/NDUFA3/NDUFC2/NDUFB8	10
GO:0032981	mitochondrial respiratory chain complex I assembly	10/486	57/18723	1.83106e-06	0.000113471	8.94675e-05	NDUFA11/NDUFB11/NDUFA13/NDUFS5/NDUFB2/NDUFA1/NDUFA6/NDUFA3/NDUFC2/NDUFB8	10
GO:0035710	CD4-positive, alpha-beta T cell activation	13/486	102/18723	2.36131e-06	0.000142542	0.000112388	ANXA1/GATA3/RELB/RARA/SOCS1/ZC3H12A/HMGB1/VSIR/CD55/BATF/XCL1/NFKBIZ/BCL3	13
GO:0043281	regulation of cysteine-type endopeptidase activity involved in apoptotic process	19/486	209/18723	2.36883e-06	0.000142542	0.000112388	RPS3/RACK1/HSPE1/PPARG/HSPD1/CYCS/NDUFA13/PRR7/CARD16/MYC/LAPTM5/HMGB1/PAK2/ANP32B/FIS1/RHOA/PARK7/RPS27L/IFI6	19
GO:1903131	mononuclear cell differentiation	29/486	426/18723	2.50005e-06	0.000148289	0.00011692	RPL22/SLAMF1/ANXA1/LGALS1/HLA-B/B2M/RPS6/ZFP36L2/GATA3/PPARG/RELB/NTRK1/RARA/PRR7/CCR6/SLC25A5/SOCS1/MYC/ZC3H12A/PRELID1/HMGB1/PRDX2/VSIR/BATF/ITM2A/SOD1/RHOA/NFKBIZ/BCL3	29
GO:0045727	positive regulation of translation	15/486	136/18723	2.56648e-06	0.000150085	0.000118336	RPL26/RPS4X/VIM/RPL5/RPS9/SERP1/NPM1/EIF5A/PABPC1/EEF2/EIF3E/RHOA/RPS27L/BCL3/EIF4A3	15
GO:0050821	protein stabilization	18/486	191/18723	2.61237e-06	0.000150647	0.000118779	RPL11/RPS7/GAPDH/RPL5/PPIB/NPM1/PDCL3/HSPD1/HSPA1A/HSP90AB1/HSP90AA1/PFN1/PTGES3/ATP1B3/UBE2B/ATP1B1/CALR/PARK7	18
GO:0051099	positive regulation of binding	17/486	173/18723	2.79587e-06	0.00015902	0.000125381	RPL11/S100A10/B2M/GATA3/PPARG/HSP90AB1/TXN/RARA/TGFB1/RAN/EDF1/HMGB1/ANXA2/CALM1/EIF3E/PARK7/CALM3	17
GO:0070670	response to interleukin-4	8/486	36/18723	3.10574e-06	0.000174257	0.000137395	RPLP0/GATA3/IL2RG/RPL3/HSP90AB1/HSPA5/TUBA1B/XCL1	8
GO:0006839	mitochondrial transport	21/486	254/18723	3.2364e-06	0.000179167	0.000141266	CHCHD10/TOMM7/HSPD1/HSPA1A/NDUFA13/HSP90AA1/SMDT1/ROMO1/TOMM22/SLC25A5/TOMM20/SLC25A3/UBL5/ALKBH7/TOMM5/FIS1/VDAC1/RAC2/VDAC2/TSPO/UCP2	21
GO:0002262	myeloid cell homeostasis	16/486	157/18723	3.40564e-06	0.000186055	0.000146697	RPS24/RPS14/RPS19/ANXA1/B2M/RPS6/ISG15/GATA3/RPS17/HSPA1A/PRDX1/ALAS1/SLC25A5/HMGB1/ZFP36/SOD1	16
GO:0001933	negative regulation of protein phosphorylation	25/486	342/18723	3.57869e-06	0.00019297	0.000152149	RACK1/DDIT4/NPM1/PPIA/PPARG/HSPB1/MYADM/TGFB1/CDKN1A/DUSP6/GADD45A/SOCS1/ZC3H12A/SOCS3/CDKN1B/FKBP8/UBE2B/GADD45B/PAK2/CALM1/PTPN1/PRNP/SNX6/PARK7/CALM3	25
GO:0030217	T cell differentiation	21/486	257/18723	3.89401e-06	0.000207281	0.000163433	RPL22/ANXA1/B2M/RPS6/ZFP36L2/GATA3/RELB/RARA/PRR7/CCR6/SOCS1/ZC3H12A/PRELID1/HMGB1/PRDX2/VSIR/BATF/SOD1/RHOA/NFKBIZ/BCL3	21
GO:0072332	intrinsic apoptotic signaling pathway by p53 class mediator	11/486	76/18723	4.0247e-06	0.000208882	0.000164695	RPL11/RPS7/RPL26/MIF/HINT1/DDIT4/CDKN1A/UBB/EIF5A/RPS27L/BCL3	11
GO:2000379	positive regulation of reactive oxygen species metabolic process	11/486	76/18723	4.0247e-06	0.000208882	0.000164695	CYBA/TGFB1/ROMO1/CDKN1A/GADD45A/ZC3H12A/SOD1/SOD2/PARK7/DCXR/TSPO	11
GO:0090150	establishment of protein localization to membrane	21/486	260/18723	4.67076e-06	0.000239419	0.000188773	NACA/RACK1/SEC61B/CHMP4B/NDUFA13/HSP90AA1/HSPA5/SEC61G/ROMO1/SSR2/TOMM22/SRP14/CALM1/ATP1B1/FIS1/SSR3/VPS37B/PRNP/WDR83OS/CALM3/SEC62	21
GO:0033108	mitochondrial respiratory chain complex assembly	12/486	93/18723	5.05948e-06	0.000256182	0.000201989	NDUFA11/NDUFB11/NDUFA13/NDUFS5/NDUFB2/NDUFA1/UQCRFS1/NDUFA6/NDUFA3/NDUFC2/NDUFB8/COX20	12
GO:0034250	positive regulation of cellular amide metabolic process	16/486	162/18723	5.12193e-06	0.00025622	0.000202019	RPL26/RPS4X/VIM/RPL5/RPS9/SERP1/NPM1/EIF5A/IFNGR1/PABPC1/EEF2/EIF3E/RHOA/RPS27L/BCL3/EIF4A3	16
GO:0051235	maintenance of location	24/486	327/18723	5.2283e-06	0.000258428	0.00020376	FTH1/SRGN/FTL/PLIN2/TMSB10/CHCHD10/CYBA/TMSB4X/INSIG1/PPARG/NBL1/TXN/HSP90B1/HSPA5/ZC3H12A/SKP1/CALM1/ALKBH7/XCL1/CALR/YWHAB/PARK7/CALM3/TSPO	24
GO:0001819	positive regulation of cytokine production	30/486	467/18723	5.3745e-06	0.000262529	0.000206993	MIF/RPS3/GAPDH/HLA-A/CYBA/SLAMF1/ANXA1/B2M/ISG15/RGCC/GATA3/HSPB1/HSPD1/DDT/HSPA1A/HSP90AA1/RARA/TGFB1/LTB/LAPTM5/HMGB1/IFNGR1/AKIRIN2/GPSM3/CD55/BATF/XCL1/SOD1/PARK7/BCL3	30
GO:0045185	maintenance of protein location	12/486	94/18723	5.66551e-06	0.000271883	0.000214368	SRGN/TMSB10/CHCHD10/TMSB4X/INSIG1/NBL1/TXN/HSPA5/SKP1/YWHAB/PARK7/TSPO	12
GO:0030098	lymphocyte differentiation	26/486	374/18723	5.69696e-06	0.000271883	0.000214368	RPL22/SLAMF1/ANXA1/LGALS1/B2M/RPS6/ZFP36L2/GATA3/RELB/NTRK1/RARA/PRR7/CCR6/SLC25A5/SOCS1/ZC3H12A/PRELID1/HMGB1/PRDX2/VSIR/BATF/ITM2A/SOD1/RHOA/NFKBIZ/BCL3	26
GO:0032507	maintenance of protein location in cell	10/486	65/18723	6.30498e-06	0.00029748	0.000234551	SRGN/TMSB10/CHCHD10/TMSB4X/INSIG1/TXN/HSPA5/SKP1/PARK7/TSPO	10
GO:0032609	interferon-gamma production	13/486	112/18723	6.77824e-06	0.000309266	0.000243844	HLA-A/SLAMF1/ISG15/GATA3/HSPD1/RARA/LAPTM5/ZC3H12A/HMGB1/VSIR/XCL1/PRNP/BCL3	13
GO:0032649	regulation of interferon-gamma production	13/486	112/18723	6.77824e-06	0.000309266	0.000243844	HLA-A/SLAMF1/ISG15/GATA3/HSPD1/RARA/LAPTM5/ZC3H12A/HMGB1/VSIR/XCL1/PRNP/BCL3	13
GO:0046632	alpha-beta T cell differentiation	13/486	112/18723	6.77824e-06	0.000309266	0.000243844	RPL22/ANXA1/GATA3/RELB/RARA/PRR7/SOCS1/ZC3H12A/HMGB1/BATF/RHOA/NFKBIZ/BCL3	13
GO:2001056	positive regulation of cysteine-type endopeptidase activity	15/486	148/18723	7.34354e-06	0.000331417	0.000261309	RPS3/RACK1/HSPE1/PPARG/HSPD1/CYCS/NDUFA13/PRR7/MYC/LAPTM5/HMGB1/ANP32B/FIS1/RHOA/RPS27L	15
GO:0001818	negative regulation of cytokine production	25/486	357/18723	7.58978e-06	0.000337441	0.000266058	SRGN/SLAMF1/TMSB4X/ANXA1/RGCC/EZR/GATA3/RELB/HSP90AB1/REL/RARA/RAC1/TGFB1/CARD16/LAPTM5/ZC3H12A/HMGB1/VSIR/ZFP36/XCL1/PRNP/BCL3/BST2/NUTF2/TSPO	25
GO:0044403	biological process involved in symbiotic interaction	22/486	290/18723	7.63955e-06	0.000337441	0.000266058	RPSA/GAPDH/PPIB/IFITM1/SLAMF1/LGALS1/LY6E/CHMP4B/PPIA/HSPD1/HSPA1A/IFITM2/HSP90AB1/HSPA8/ROMO1/ZC3H12A/CD55/P4HB/VPS37B/SLC3A2/BSG/TNFRSF4	22
GO:0006620	posttranslational protein targeting to endoplasmic reticulum membrane	5/486	12/18723	7.86332e-06	0.000338645	0.000267008	SEC61B/CHMP4B/HSPA5/SEC61G/SEC62	5
GO:0043254	regulation of protein-containing complex assembly	28/486	428/18723	7.89324e-06	0.000338645	0.000267008	RPS3/RPL13A/TMSB10/TMSB4X/RACK1/ISG15/HSPA1A/ARPC3/MYADM/HSPA8/HSP90AA1/PFN1/HSPA5/RAC1/TGFB1/CAPG/CDC42/LMO4/ARF6/HMGB1/ARPC1B/FKBP4/CDKN1B/RAP1B/GMFG/RHOA/PARK7/VDAC2	28
GO:0051438	regulation of ubiquitin-protein transferase activity	9/486	53/18723	7.97744e-06	0.000338645	0.000267008	RPS15/RPL11/RPS7/RPL37/RPS2/RPL5/RPS20/SKP1/PARK7	9
GO:0019079	viral genome replication	14/486	131/18723	7.99307e-06	0.000338645	0.000267008	PPIB/IFITM1/PCBP2/PCBP1/ISG15/PPIA/IFITM2/HSPA8/CDC42/ZC3H12A/CXCR6/PABPC1/BST2/ISG20	14
GO:0061077	chaperone-mediated protein folding	10/486	67/18723	8.33894e-06	0.000346233	0.00027299	PPIB/HSPE1/HSPB1/PDCL3/HSPA1A/HSPA8/HSPA5/PTGES3/FKBP4/ST13	10
GO:2000514	regulation of CD4-positive, alpha-beta T cell activation	10/486	67/18723	8.33894e-06	0.000346233	0.00027299	ANXA1/GATA3/RARA/SOCS1/ZC3H12A/HMGB1/VSIR/CD55/XCL1/NFKBIZ	10
GO:0042326	negative regulation of phosphorylation	26/486	385/18723	9.5402e-06	0.000391111	0.000308375	RACK1/DDIT4/NPM1/PPIA/PPARG/HSPB1/MYADM/TGFB1/CDKN1A/DUSP6/GADD45A/SOCS1/ZC3H12A/SOCS3/CDKN1B/FKBP8/UBE2B/GADD45B/PAK2/CALM1/PTPN1/PRNP/SNX6/DYNLL1/PARK7/CALM3	26
GO:0007568	aging	24/486	339/18723	9.60821e-06	0.000391111	0.000308375	MIF/LMNA/GPX4/SERP1/B2M/NPM1/YBX1/NTRK1/TIMP1/ROMO1/CDKN1A/CACYBP/TNFRSF1B/CDKN1B/NAMPT/EEF2/MAP2K3/HMGA1/CALR/PRNP/SOD1/SOD2/TSPO/UCP2	24
GO:0051098	regulation of binding	25/486	363/18723	1.01155e-05	0.000407761	0.000321503	RPL11/S100A10/TMSB4X/RACK1/B2M/GATA3/PPARG/HSP90AB1/TXN/RARA/TGFB1/RAN/CDKN1A/CARD16/EDF1/CDC42/HMGB1/ANXA2/CALM1/EIF3E/PARK7/BCL3/CSNK2B/CALM3/EIF4A3	25
GO:0097305	response to alcohol	20/486	253/18723	1.07957e-05	0.000428156	0.000337584	EEF1B2/HPGD/RPL10A/CYBA/RPL15/RPL27/PTGER2/GATA3/FDX1/RARA/TGFB1/CDKN1A/GNG2/EEF2/CALM1/SOD1/RHOA/SOD2/CALM3/TSPO	20
GO:0006626	protein targeting to mitochondrion	12/486	100/18723	1.08276e-05	0.000428156	0.000337584	TOMM7/HSPD1/NDUFA13/HSP90AA1/ROMO1/TOMM22/TOMM20/UBL5/TOMM5/FIS1/RAC2/TSPO	12
GO:0031647	regulation of protein stability	22/486	298/18723	1.17396e-05	0.000459839	0.000362564	RPL11/RPS7/GAPDH/RPL5/PPIB/LMNA/NPM1/TOMM7/PDCL3/HSPD1/HSPA1A/HSP90AB1/HSPA8/HSP90AA1/PFN1/PTGES3/ATP1B3/UBE2B/ATP1B1/CALR/PRNP/PARK7	22
GO:0006413	translational initiation	13/486	118/18723	1.20516e-05	0.000467648	0.000368721	RPS3A/RPS3/RPS5/RPL13A/NPM1/EIF1/HSPB1/RPS17/EIF3K/EIF3F/EIF1AX/EIF3E/EIF2S2	13
GO:0043388	positive regulation of DNA binding	9/486	56/18723	1.27289e-05	0.000487931	0.000384714	GATA3/PPARG/TXN/TGFB1/EDF1/HMGB1/CALM1/PARK7/CALM3	9
GO:0051651	maintenance of location in cell	18/486	214/18723	1.28094e-05	0.000487931	0.000384714	FTH1/SRGN/FTL/TMSB10/CHCHD10/CYBA/TMSB4X/INSIG1/TXN/HSP90B1/HSPA5/SKP1/CALM1/XCL1/CALR/PARK7/CALM3/TSPO	18
GO:2000116	regulation of cysteine-type endopeptidase activity	19/486	235/18723	1.30069e-05	0.000490953	0.000387097	RPS3/RACK1/HSPE1/PPARG/HSPD1/CYCS/NDUFA13/PRR7/CARD16/MYC/LAPTM5/HMGB1/PAK2/ANP32B/FIS1/RHOA/PARK7/RPS27L/IFI6	19
GO:0045936	negative regulation of phosphate metabolic process	28/486	441/18723	1.37175e-05	0.00051311	0.000404567	RACK1/DDIT4/NPM1/PPIA/PPARG/HSPB1/MYADM/TGFB1/CDKN1A/DUSP6/GADD45A/SOCS1/ZC3H12A/SOCS3/CDKN1B/FKBP8/UBE2B/GADD45B/PAK2/CALM1/PTPN1/PRNP/SNX6/YWHAB/DYNLL1/PARK7/ENSA/CALM3	28
GO:0010563	negative regulation of phosphorus metabolic process	28/486	442/18723	1.42977e-05	0.000530035	0.000417911	RACK1/DDIT4/NPM1/PPIA/PPARG/HSPB1/MYADM/TGFB1/CDKN1A/DUSP6/GADD45A/SOCS1/ZC3H12A/SOCS3/CDKN1B/FKBP8/UBE2B/GADD45B/PAK2/CALM1/PTPN1/PRNP/SNX6/YWHAB/DYNLL1/PARK7/ENSA/CALM3	28
GO:0021762	substantia nigra development	8/486	44/18723	1.51604e-05	0.000557043	0.000439206	HSPA5/CDC42/CALM1/YWHAH/RHOA/DYNLL1/COX6B1/CALM3	8
GO:0046634	regulation of alpha-beta T cell activation	12/486	104/18723	1.62252e-05	0.000590938	0.000465931	HLA-A/ANXA1/GATA3/RARA/SOCS1/ZC3H12A/HMGB1/VSIR/CD55/XCL1/RHOA/NFKBIZ	12
GO:0042743	hydrogen peroxide metabolic process	9/486	58/18723	1.70885e-05	0.000616968	0.000486455	CYBA/PRDX1/RAC1/PRDX2/PRDX6/SOD1/RAC2/SOD2/PARK7	9
GO:0071806	protein transmembrane transport	9/486	59/18723	1.97066e-05	0.000705361	0.000556149	SEC61B/TOMM7/HSPD1/HSPA5/SEC61G/ROMO1/TOMM22/TOMM20/SEC62	9
GO:0060326	cell chemotaxis	22/486	310/18723	2.16673e-05	0.000768913	0.000606257	MIF/RPS19/PPIB/SLAMF1/TMSB4X/ANXA1/NINJ1/PPIA/RHOG/HSPB1/NBL1/DDT/RAC1/CKLF/CCR6/HMGB1/CXCR6/GPSM3/XCL1/CALR/BSG/RAC2	22
GO:0051348	negative regulation of transferase activity	20/486	268/18723	2.49571e-05	0.000878151	0.000692386	RPS15/RPL11/RPS7/RPL37/RPL5/RACK1/NPM1/PPIA/PPARG/HSPB1/RPS20/CDKN1A/GADD45A/CDKN1B/GADD45B/PAK2/ZFP36/PTPN1/SNX6/PARK7	20
GO:0002726	positive regulation of T cell cytokine production	6/486	24/18723	2.68153e-05	0.000935608	0.000737689	HLA-A/SLAMF1/B2M/GATA3/CD55/XCL1	6
GO:0045064	T-helper 2 cell differentiation	5/486	15/18723	2.79491e-05	0.000951185	0.000749971	ANXA1/GATA3/RARA/BATF/BCL3	5
GO:0098760	response to interleukin-7	5/486	15/18723	2.79491e-05	0.000951185	0.000749971	YBX1/IL2RG/HSPD1/HMGB1/P4HB	5
GO:0098761	cellular response to interleukin-7	5/486	15/18723	2.79491e-05	0.000951185	0.000749971	YBX1/IL2RG/HSPD1/HMGB1/P4HB	5
GO:1901796	regulation of signal transduction by p53 class mediator	11/486	93/18723	2.88286e-05	0.00097314	0.000767281	RPS15/RPL11/RPS7/RPL26/MIF/RPL37/RPL5/NPM1/RPS20/UBB/EIF5A	11
GO:0034101	erythrocyte homeostasis	13/486	129/18723	3.14961e-05	0.00105461	0.000831519	RPS24/RPS14/RPS19/B2M/RPS6/ISG15/GATA3/RPS17/HSPA1A/PRDX1/ALAS1/SLC25A5/ZFP36	13
GO:0033157	regulation of intracellular protein transport	18/486	229/18723	3.18803e-05	0.00105894	0.000834929	INSIG1/OAZ1/EMD/TOMM7/HSP90AB1/TXN/TGFB1/RAN/CDC42/ZC3H12A/UBL5/ANP32B/FIS1/PTPN1/PRNP/RAC2/PARK7/NUTF2	18
GO:0030595	leukocyte chemotaxis	18/486	230/18723	3.3774e-05	0.00111293	0.000877502	MIF/RPS19/PPIB/SLAMF1/ANXA1/NINJ1/PPIA/NBL1/DDT/RAC1/CKLF/CCR6/HMGB1/GPSM3/XCL1/CALR/BSG/RAC2	18
GO:0140694	non-membrane-bounded organelle assembly	24/486	367/18723	3.52041e-05	0.00114286	0.000901097	RPL10/RPS28/RPS15/RPL11/RPLP0/RPS23/RPS27/RPL24/RPS14/RPS19/RPS3/RPS5/RPSA/RPL5/RPL23A/RPL38/NPM1/CHMP4B/EZR/RPL3/HSPA1A/ACTG1/RHOA/RPS27L	24
GO:0042176	regulation of protein catabolic process	25/486	391/18723	3.52326e-05	0.00114286	0.000901097	RPL11/RPS7/EEF1A1/RPL5/RACK1/GABARAP/OAZ1/EZR/PDCL3/HSPA1A/HSP90AB1/ELOB/SUMO2/NDUFA13/HSP90AA1/TIMP1/ODC1/UBB/LAPTM5/TNFRSF1B/ANXA2/CDKN1B/PSME1/PSME2/PARK7	25
GO:0002369	T cell cytokine production	7/486	37/18723	3.98526e-05	0.00126312	0.000995916	HLA-A/SLAMF1/B2M/GATA3/TNFRSF1B/CD55/XCL1	7
GO:0002724	regulation of T cell cytokine production	7/486	37/18723	3.98526e-05	0.00126312	0.000995916	HLA-A/SLAMF1/B2M/GATA3/TNFRSF1B/CD55/XCL1	7
GO:0045730	respiratory burst	7/486	37/18723	3.98526e-05	0.00126312	0.000995916	RPS19/CYBA/CD52/RAC1/PRDX2/CD55/RAC2	7
GO:0007569	cell aging	13/486	132/18723	4.01645e-05	0.00126336	0.000996105	MIF/LMNA/B2M/NPM1/YBX1/ROMO1/CDKN1A/CDKN1B/NAMPT/MAP2K3/HMGA1/CALR/SOD1	13
GO:0070482	response to oxygen levels	23/486	347/18723	4.14841e-05	0.00129505	0.0010211	LMNA/CYBA/DDIT4/CHCHD2/RGCC/HSPD1/HSP90B1/AQP3/CDKN1A/CARD16/PGK1/MYC/CDKN1B/NAMPT/LDHA/ATP1B1/P4HB/FIS1/ATP6V1G1/RHOA/SOD2/HMOX2/UCP2	23
GO:0006979	response to oxidative stress	27/486	446/18723	4.46934e-05	0.00138483	0.00109188	NME2/RPS3/RACK1/ANXA1/GPX4/CHCHD2/PPIA/HSPB1/HSPD1/HSPA1A/TXN/BTG1/PRDX1/ROMO1/ZC3H12A/PRDX2/LDHA/EEF2/NDUFA6/PRDX6/P4HB/PRNP/SOD1/SOD2/PARK7/HMOX2/UCP2	27
GO:0000422	autophagy of mitochondrion	10/486	81/18723	4.56854e-05	0.00139475	0.0010997	GABARAP/TOMM7/SQSTM1/MAP1LC3B/SLC25A5/GABARAPL1/FIS1/VDAC1/PARK7/TSPO	10
GO:0061726	mitochondrion disassembly	10/486	81/18723	4.56854e-05	0.00139475	0.0010997	GABARAP/TOMM7/SQSTM1/MAP1LC3B/SLC25A5/GABARAPL1/FIS1/VDAC1/PARK7/TSPO	10
GO:0065002	intracellular protein transmembrane transport	8/486	51/18723	4.6458e-05	0.00140798	0.00111014	SEC61B/TOMM7/HSPD1/HSPA5/SEC61G/ROMO1/TOMM20/SEC62	8
GO:0051222	positive regulation of protein transport	21/486	303/18723	4.68929e-05	0.00141087	0.00111241	RACK1/SERP1/OAZ1/EMD/EZR/PPIA/TOMM7/HSP90AB1/RAC1/TGFB1/RAN/CDC42/ARF6/ZC3H12A/UBL5/ANP32B/FIS1/PRNP/RAC2/DYNLL1/NUTF2	21
GO:0042093	T-helper cell differentiation	9/486	66/18723	4.94367e-05	0.0014767	0.00116432	ANXA1/GATA3/RELB/RARA/ZC3H12A/HMGB1/BATF/NFKBIZ/BCL3	9
GO:0050870	positive regulation of T cell activation	17/486	216/18723	5.17198e-05	0.00153386	0.00120939	RPS3/HLA-A/SLAMF1/ANXA1/LGALS1/EFNB1/B2M/GATA3/HSPD1/RARA/SOCS1/HMGB1/VSIR/CD55/XCL1/RHOA/NFKBIZ	17
GO:0052126	movement in host environment	15/486	175/18723	5.38092e-05	0.00158451	0.00124932	RPSA/IFITM1/SLAMF1/LGALS1/LY6E/CHMP4B/PPIA/HSPA1A/IFITM2/CD55/P4HB/VPS37B/SLC3A2/BSG/TNFRSF4	15
GO:0032703	negative regulation of interleukin-2 production	6/486	27/18723	5.52006e-05	0.00161403	0.0012726	EZR/GATA3/LAPTM5/ZFP36/XCL1/PRNP	6
GO:0043367	CD4-positive, alpha-beta T cell differentiation	10/486	83/18723	5.64872e-05	0.0016401	0.00129316	ANXA1/GATA3/RELB/RARA/SOCS1/ZC3H12A/HMGB1/BATF/NFKBIZ/BCL3	10
GO:0051101	regulation of DNA binding	12/486	118/18723	5.77245e-05	0.00166439	0.0013123	TMSB4X/GATA3/PPARG/TXN/TGFB1/EDF1/HMGB1/CALM1/PARK7/BCL3/CSNK2B/CALM3	12
GO:0006986	response to unfolded protein	13/486	137/18723	5.92631e-05	0.00169697	0.00133799	RACK1/SERP1/HSPE1/RHBDD2/HSPB1/HSPD1/HSPA1A/HSP90AB1/HSPA8/HSP90AA1/HSPA5/MANF/PTPN1	13
GO:0002294	CD4-positive, alpha-beta T cell differentiation involved in immune response	9/486	68/18723	6.28708e-05	0.00178794	0.00140972	ANXA1/GATA3/RELB/RARA/ZC3H12A/HMGB1/BATF/NFKBIZ/BCL3	9
GO:0000470	maturation of LSU-rRNA	6/486	28/18723	6.87254e-05	0.00194114	0.00153051	RPL7A/RPL35/RPL7/RPL10A/NSA2/SNU13	6
GO:0002709	regulation of T cell mediated immunity	10/486	85/18723	6.93905e-05	0.00194669	0.00153488	HLA-A/SLAMF1/HLA-B/B2M/GATA3/HSPD1/HMGB1/TNFRSF1B/CD55/XCL1	10
GO:0002287	alpha-beta T cell activation involved in immune response	9/486	69/18723	7.0664e-05	0.00195598	0.00154221	ANXA1/GATA3/RELB/RARA/ZC3H12A/HMGB1/BATF/NFKBIZ/BCL3	9
GO:0002293	alpha-beta T cell differentiation involved in immune response	9/486	69/18723	7.0664e-05	0.00195598	0.00154221	ANXA1/GATA3/RELB/RARA/ZC3H12A/HMGB1/BATF/NFKBIZ/BCL3	9
GO:0002683	negative regulation of immune system process	26/486	434/18723	7.32654e-05	0.00201456	0.0015884	NME2/MIF/RPS19/HLA-A/SLAMF1/ANXA1/HLA-B/PCBP2/ISG15/EZR/PPARG/NBL1/DDT/RARA/TGFB1/SOCS1/MYC/LAPTM5/ZC3H12A/HMGB1/PRDX2/VSIR/CD55/XCL1/PRNP/BST2	26
GO:0090316	positive regulation of intracellular protein transport	14/486	160/18723	7.58725e-05	0.00207252	0.0016341	OAZ1/EMD/TOMM7/HSP90AB1/TGFB1/RAN/CDC42/ZC3H12A/UBL5/ANP32B/FIS1/PRNP/RAC2/NUTF2	14
GO:0032388	positive regulation of intracellular transport	16/486	202/18723	7.9179e-05	0.00213756	0.00168538	OAZ1/EMD/EZR/TOMM7/HSP90AB1/TGFB1/RAN/CDC42/ZC3H12A/ANXA2/UBL5/ANP32B/FIS1/PRNP/RAC2/NUTF2	16
GO:0031333	negative regulation of protein-containing complex assembly	13/486	141/18723	7.9798e-05	0.00213756	0.00168538	RPL13A/TMSB10/TMSB4X/MYADM/PFN1/HSPA5/CAPG/CDC42/LMO4/HMGB1/FKBP4/PARK7/VDAC2	13
GO:0034341	response to interferon-gamma	13/486	141/18723	7.9798e-05	0.00213756	0.00168538	VIM/GAPDH/RPL13A/IFITM1/PPARG/IFITM2/HSP90AB1/CDC42/SOCS1/IFNGR1/XCL1/ACTG1/BST2	13
GO:1902175	regulation of oxidative stress-induced intrinsic apoptotic signaling pathway	6/486	29/18723	8.47675e-05	0.00224175	0.00176753	PPIA/HSPB1/P4HB/SOD1/SOD2/PARK7	6
GO:1902253	regulation of intrinsic apoptotic signaling pathway by p53 class mediator	6/486	29/18723	8.47675e-05	0.00224175	0.00176753	RPL11/RPS7/RPL26/MIF/UBB/EIF5A	6
GO:0002819	regulation of adaptive immune response	15/486	183/18723	8.95523e-05	0.0023533	0.00185548	HLA-A/SLAMF1/ANXA1/HLA-B/B2M/GATA3/HSPD1/CD48/TGFB1/ZC3H12A/HMGB1/TNFRSF1B/CD55/XCL1/NFKBIZ	15
GO:0002711	positive regulation of T cell mediated immunity	8/486	56/18723	9.25263e-05	0.00240779	0.00189845	HLA-A/SLAMF1/HLA-B/B2M/GATA3/HSPD1/CD55/XCL1	8
GO:0045047	protein targeting to ER	7/486	42/18723	9.33658e-05	0.00240779	0.00189845	SEC61B/CHMP4B/HSPA5/SEC61G/SRP14/SSR3/SEC62	7
GO:0072595	maintenance of protein localization in organelle	7/486	42/18723	9.33658e-05	0.00240779	0.00189845	CHCHD10/INSIG1/TXN/HSPA5/SKP1/PARK7/TSPO	7
GO:1904951	positive regulation of establishment of protein localization	21/486	319/18723	9.77909e-05	0.00250634	0.00197615	RACK1/SERP1/OAZ1/EMD/EZR/PPIA/TOMM7/HSP90AB1/RAC1/TGFB1/RAN/CDC42/ARF6/ZC3H12A/UBL5/ANP32B/FIS1/PRNP/RAC2/DYNLL1/NUTF2	21
GO:0090151	establishment of protein localization to mitochondrial membrane	6/486	30/18723	0.000103654	0.00264032	0.00208178	NDUFA13/HSP90AA1/ROMO1/TOMM22/CALM1/CALM3	6
GO:0006611	protein export from nucleus	8/486	57/18723	0.000105221	0.00265323	0.00209197	EMD/TXN/TGFB1/RAN/ANP32B/CALR/PARK7/NUTF2	8
GO:0050900	leukocyte migration	23/486	369/18723	0.000105439	0.00265323	0.00209197	MIF/RPS19/PPIB/SLAMF1/ANXA1/NINJ1/PPIA/GATA3/RHOG/NBL1/DDT/RAC1/CKLF/CDC42/CCR6/HMGB1/TNFRSF18/GPSM3/XCL1/CALR/BSG/RHOA/RAC2	23
GO:0006458	'de novo' protein folding	7/486	43/18723	0.000109053	0.00271723	0.00214242	HSPE1/HSPD1/HSPA1A/HSPA8/HSPA5/PTGES3/ST13	7
GO:2001235	positive regulation of apoptotic signaling pathway	12/486	126/18723	0.000109291	0.00271723	0.00214242	RPL11/RPS7/RPL26/RPS3/RACK1/UBB/EIF5A/PAK2/PLEKHF1/FIS1/SOD1/PARK7	12
GO:0036293	response to decreased oxygen levels	21/486	322/18723	0.000111521	0.00275616	0.00217312	LMNA/CYBA/DDIT4/CHCHD2/RGCC/HSPD1/HSP90B1/AQP3/CARD16/PGK1/MYC/CDKN1B/NAMPT/LDHA/ATP1B1/P4HB/FIS1/RHOA/SOD2/HMOX2/UCP2	21
GO:0007159	leukocyte cell-cell adhesion	23/486	371/18723	0.00011426	0.00280715	0.00221332	RPS3/HLA-A/SLAMF1/ANXA1/LGALS1/EFNB1/B2M/EZR/GATA3/HSPD1/RARA/SOCS1/LAPTM5/ZC3H12A/HMGB1/PRDX2/VSIR/CD55/XCL1/PRNP/RHOA/RAC2/NFKBIZ	23
GO:0051881	regulation of mitochondrial membrane potential	9/486	74/18723	0.000122908	0.00300185	0.00236684	RACK1/CLIC1/UBB/PRELID1/SOD1/PARK7/IFI6/TSPO/UCP2	9
GO:1903362	regulation of cellular protein catabolic process	18/486	255/18723	0.000127904	0.00307381	0.00242358	RPL11/RPS7/RPL5/RACK1/GABARAP/EZR/PDCL3/HSPA1A/HSP90AB1/ELOB/SUMO2/HSP90AA1/UBB/LAPTM5/ANXA2/PSME1/PSME2/PARK7	18
GO:0034975	protein folding in endoplasmic reticulum	4/486	11/18723	0.000127999	0.00307381	0.00242358	HSP90B1/HSPA5/P4HB/CALR	4
GO:0002822	regulation of adaptive immune response based on somatic recombination of immune receptors built from immunoglobulin superfamily domains	14/486	168/18723	0.000128076	0.00307381	0.00242358	HLA-A/SLAMF1/ANXA1/HLA-B/B2M/GATA3/HSPD1/TGFB1/ZC3H12A/HMGB1/TNFRSF1B/CD55/XCL1/NFKBIZ	14
GO:0032271	regulation of protein polymerization	17/486	233/18723	0.000131486	0.00313752	0.00247381	RPS3/TMSB10/TMSB4X/HSPA1A/ARPC3/MYADM/HSP90AA1/PFN1/RAC1/CAPG/ARF6/ARPC1B/FKBP4/CDKN1B/GMFG/RHOA/VDAC2	17
GO:0002292	T cell differentiation involved in immune response	9/486	75/18723	0.00013651	0.0032388	0.00255367	ANXA1/GATA3/RELB/RARA/ZC3H12A/HMGB1/BATF/NFKBIZ/BCL3	9
GO:0002699	positive regulation of immune effector process	17/486	235/18723	0.000145768	0.00343879	0.00271135	RPS19/HLA-A/SLAMF1/ANXA1/HLA-B/B2M/NCR3/GATA3/HSPD1/RARA/TGFB1/LAPTM5/CD55/XCL1/RAC2/NFKBIZ/TNFRSF4	17
GO:0006612	protein targeting to membrane	12/486	131/18723	0.000158487	0.00371774	0.00293129	NACA/SEC61B/CHMP4B/HSPA5/SEC61G/SSR2/SRP14/FIS1/SSR3/VPS37B/PRNP/SEC62	12
GO:0001666	response to hypoxia	20/486	307/18723	0.000163817	0.00382116	0.00301283	LMNA/CYBA/DDIT4/CHCHD2/RGCC/HSPD1/HSP90B1/AQP3/CARD16/PGK1/MYC/CDKN1B/LDHA/ATP1B1/P4HB/FIS1/RHOA/SOD2/HMOX2/UCP2	20
GO:0072599	establishment of protein localization to endoplasmic reticulum	7/486	46/18723	0.000169388	0.00392904	0.00309789	SEC61B/CHMP4B/HSPA5/SEC61G/SRP14/SSR3/SEC62	7
GO:0030865	cortical cytoskeleton organization	8/486	61/18723	0.00017128	0.00393684	0.00310404	EZR/RHOG/RAC1/RHOF/ARF6/CALR/RHOA/RAC2	8
GO:0002285	lymphocyte activation involved in immune response	15/486	194/18723	0.00017162	0.00393684	0.00310404	ANXA1/LGALS1/RPS6/GATA3/HSPD1/RELB/RARA/TGFB1/CCR6/ZC3H12A/HMGB1/BATF/ITM2A/NFKBIZ/BCL3	15
GO:1903039	positive regulation of leukocyte cell-cell adhesion	17/486	239/18723	0.000178454	0.00407111	0.00320991	RPS3/HLA-A/SLAMF1/ANXA1/LGALS1/EFNB1/B2M/GATA3/HSPD1/RARA/SOCS1/HMGB1/VSIR/CD55/XCL1/RHOA/NFKBIZ	17
GO:0032956	regulation of actin cytoskeleton organization	22/486	358/18723	0.000181271	0.00411277	0.00324275	S100A10/TMSB10/TMSB4X/RGCC/RHOG/ARPC3/MYADM/PFN1/RAC1/RHOF/CAPG/CDC42/ARF6/ARPC1B/PAK2/ARHGDIA/ARHGDIB/GMFG/ACTG1/RHOA/RAC2/BST2	22
GO:1902903	regulation of supramolecular fiber organization	23/486	383/18723	0.000182359	0.00411498	0.00324449	RPS3/S100A10/TMSB10/TMSB4X/PFDN5/RGCC/HSPA1A/ARPC3/MYADM/HSPA8/PFN1/RAC1/CAPG/CDC42/ARF6/ARPC1B/FKBP4/CDKN1B/PAK2/GMFG/ACTG1/RHOA/PARK7	23
GO:0008380	RNA splicing	25/486	434/18723	0.000184786	0.0041472	0.0032699	RPS26/RPS13/NPM1/SNRPD2/YBX1/ARL6IP4/HSPA1A/HNRNPA1/HSPA8/RBM8A/SNU13/MAGOH/UBL5/PABPC1/TSEN54/PRDX6/STRAP/SNRPB2/SAP18/SF3B5/LSM7/BCAS2/SNRPB/EIF4A3/SNRPG	25
GO:1903008	organelle disassembly	11/486	114/18723	0.000186841	0.00417078	0.00328849	GABARAP/TOMM7/SQSTM1/MAP1LC3B/SLC25A5/GABARAPL1/FIS1/VDAC1/UFC1/PARK7/TSPO	11
GO:0032623	interleukin-2 production	8/486	62/18723	0.000192255	0.00424596	0.00334777	RPS3/ANXA1/EZR/GATA3/LAPTM5/ZFP36/XCL1/PRNP	8
GO:0032663	regulation of interleukin-2 production	8/486	62/18723	0.000192255	0.00424596	0.00334777	RPS3/ANXA1/EZR/GATA3/LAPTM5/ZFP36/XCL1/PRNP	8
GO:0002718	regulation of cytokine production involved in immune response	10/486	96/18723	0.000194102	0.00426408	0.00336205	HLA-A/SLAMF1/B2M/GATA3/TGFB1/LAPTM5/TNFRSF1B/CD55/XCL1/BST2	10
GO:0009410	response to xenobiotic stimulus	26/486	462/18723	0.000199456	0.00435864	0.00343661	S100A10/PLIN2/CYBA/ANXA1/LGALS1/B2M/GATA3/HSPD1/HSP90AB1/NTRK1/GUK1/HSPA5/CDKN1A/DUSP6/MYC/CDKN1B/UBE2B/LDHA/EEF2/RAP1B/CALR/PRNP/SOD1/RHOA/SOD2/TSPO	26
GO:1903037	regulation of leukocyte cell-cell adhesion	21/486	336/18723	0.00020081	0.00436525	0.00344182	RPS3/HLA-A/SLAMF1/ANXA1/LGALS1/EFNB1/B2M/GATA3/HSPD1/RARA/SOCS1/LAPTM5/ZC3H12A/HMGB1/PRDX2/VSIR/CD55/XCL1/PRNP/RHOA/NFKBIZ	21
GO:0045860	positive regulation of protein kinase activity	23/486	386/18723	0.000204194	0.0044157	0.0034816	RPLP1/RPS3/NPM1/RGCC/PPIA/HSP90AB1/TXN/HSP90AA1/TGFB1/CDKN1A/SYAP1/SOCS1/TRAF4/HMGB1/CDKN1B/PAK2/CALM1/MAP2K3/PTPN1/PRNP/RHOA/PARK7/CALM3	23
GO:0045785	positive regulation of cell adhesion	25/486	437/18723	0.000205309	0.00441679	0.00348246	RPS3/S100A10/HLA-A/SLAMF1/ANXA1/LGALS1/EFNB1/B2M/GATA3/HSPD1/MYADM/SPOCK2/RARA/RAC1/CDC42/SOCS1/HMGB1/VSIR/TNFRSF18/CD55/P4HB/XCL1/CALR/RHOA/NFKBIZ	25
GO:0051085	chaperone cofactor-dependent protein refolding	6/486	34/18723	0.000215025	0.00460199	0.00362848	HSPE1/HSPA1A/HSPA8/HSPA5/PTGES3/ST13	6
GO:0007006	mitochondrial membrane organization	11/486	116/18723	0.00021791	0.00463981	0.0036583	CHCHD10/HSPA1A/NDUFA13/HSP90AA1/ROMO1/TOMM22/SLC25A5/CALM1/ALKBH7/VDAC2/CALM3	11
GO:0002697	regulation of immune effector process	21/486	339/18723	0.000226617	0.00477724	0.00376666	RPS19/HLA-A/SLAMF1/ANXA1/HLA-B/B2M/NCR3/GATA3/HSPD1/RARA/TGFB1/LAPTM5/ZC3H12A/HMGB1/TNFRSF1B/CD55/XCL1/RAC2/NFKBIZ/TNFRSF4/BST2	21
GO:0042098	T cell proliferation	15/486	199/18723	0.000226666	0.00477724	0.00376666	RPS3/HLA-A/SLAMF1/ANXA1/EFNB1/RPS6/HMGB1/PRDX2/TNFRSF1B/VSIR/CD55/XCL1/PRNP/RAC2/TNFRSF4	15
GO:0002367	cytokine production involved in immune response	10/486	98/18723	0.000230159	0.00480211	0.00378627	HLA-A/SLAMF1/B2M/GATA3/TGFB1/LAPTM5/TNFRSF1B/CD55/XCL1/BST2	10
GO:2001243	negative regulation of intrinsic apoptotic signaling pathway	10/486	98/18723	0.000230159	0.00480211	0.00378627	MIF/TPT1/PPIA/HSPB1/HSPA1A/NDUFA13/PTPN1/SOD2/PARK7/VDAC2	10
GO:0033674	positive regulation of kinase activity	26/486	467/18723	0.000235919	0.00489768	0.00386162	RPLP1/RPS3/NPM1/RGCC/PPIA/HSP90AB1/TXN/NTRK1/HSP90AA1/TGFB1/CDKN1A/SYAP1/CDC42/LMO4/SOCS1/TRAF4/HMGB1/CDKN1B/PAK2/CALM1/MAP2K3/PTPN1/PRNP/RHOA/PARK7/CALM3	26
GO:0048857	neural nucleus development	8/486	64/18723	0.000240548	0.00496894	0.00391781	HSPA5/CDC42/CALM1/YWHAH/RHOA/DYNLL1/COX6B1/CALM3	8
GO:0007015	actin filament organization	25/486	442/18723	0.000244031	0.00501591	0.00395485	ALDOA/S100A10/TMSB10/TMSB4X/RGCC/EZR/RHOG/ARPC3/MYADM/HSP90B1/PFN1/RAC1/RHOF/CAPG/CDC42/ARF6/MARCKSL1/ARPC1B/PAK2/TPM3/GMFG/ACTG1/RHOA/RAC2/TPM4	25
GO:0008630	intrinsic apoptotic signaling pathway in response to DNA damage	10/486	99/18723	0.000250194	0.00511727	0.00403476	CRIP1/RPL26/MIF/RPS3/TPT1/DDIT4/CDKN1A/TNFRSF1B/RPS27L/BCL3	10
GO:0009615	response to virus	22/486	367/18723	0.000256686	0.00522432	0.00411917	EEF1G/RPS15A/IFITM1/TPT1/PCBP2/DDIT4/ISG15/GATA3/HSPB1/IFITM2/HSP90AA1/ODC1/EIF5A/ZC3H12A/IFNGR1/PSMA2/HMGA1/XCL1/BCL3/IFI6/BST2/ISG20	22
GO:0051131	chaperone-mediated protein complex assembly	5/486	23/18723	0.000263748	0.00534186	0.00421184	HSPD1/HSPA1A/HSP90AB1/HSP90AA1/PTGES3	5
GO:0035966	response to topologically incorrect protein	13/486	159/18723	0.000266735	0.00537614	0.00423887	RACK1/SERP1/HSPE1/RHBDD2/HSPB1/HSPD1/HSPA1A/HSP90AB1/HSPA8/HSP90AA1/HSPA5/MANF/PTPN1	13
GO:0034284	response to monosaccharide	16/486	225/18723	0.000275112	0.00551819	0.00435087	NME2/CYBA/RACK1/LGALS1/RAC1/CDKN1B/NAMPT/LDHA/FIS1/RHOA/SOD2/DYNLL1/ENSA/PIM3/ENY2/UCP2	16
GO:0032640	tumor necrosis factor production	14/486	181/18723	0.000279151	0.00554562	0.0043725	MIF/CYBA/SLAMF1/HSPB1/HSPD1/DDT/RARA/ZC3H12A/HMGB1/IFNGR1/VSIR/ZFP36/BCL3/TSPO	14
GO:0032680	regulation of tumor necrosis factor production	14/486	181/18723	0.000279151	0.00554562	0.0043725	MIF/CYBA/SLAMF1/HSPB1/HSPD1/DDT/RARA/ZC3H12A/HMGB1/IFNGR1/VSIR/ZFP36/BCL3/TSPO	14
GO:0051701	biological process involved in interaction with host	15/486	203/18723	0.000281102	0.00555778	0.00438209	RPSA/IFITM1/SLAMF1/LGALS1/LY6E/CHMP4B/PPIA/HSPA1A/IFITM2/CD55/P4HB/VPS37B/SLC3A2/BSG/TNFRSF4	15
GO:0030490	maturation of SSU-rRNA	7/486	50/18723	0.000289096	0.00568875	0.00448535	RPS8/RPS28/RPS14/RPS19/RPS21/RPS16/SNU13	7
GO:0098869	cellular oxidant detoxification	10/486	101/18723	0.000294666	0.005771	0.0045502	GPX4/TXN/PRDX1/ALOX5AP/PRDX2/GLRX/PRDX6/SOD1/SOD2/PARK7	10
GO:0042092	type 2 immune response	6/486	36/18723	0.000298048	0.00577276	0.00455159	ANXA1/GATA3/RARA/BATF/XCL1/BCL3	6
GO:0051258	protein polymerization	19/486	297/18723	0.00029815	0.00577276	0.00455159	RPS3/TMSB10/TMSB4X/GPX4/CHMP4B/HSPA1A/ARPC3/MYADM/HSP90AA1/PFN1/RAC1/CAPG/ARF6/ARPC1B/FKBP4/CDKN1B/GMFG/RHOA/VDAC2	19
GO:0022407	regulation of cell-cell adhesion	25/486	448/18723	0.000298927	0.00577276	0.00455159	RPS3/FXYD5/HLA-A/SLAMF1/ANXA1/LGALS1/EFNB1/B2M/RGCC/GATA3/HSPD1/MYADM/RARA/TGFB1/SOCS1/LAPTM5/ZC3H12A/HMGB1/PRDX2/VSIR/CD55/XCL1/PRNP/RHOA/NFKBIZ	25
GO:0043370	regulation of CD4-positive, alpha-beta T cell differentiation	7/486	51/18723	0.000327698	0.00629494	0.00496331	ANXA1/GATA3/RARA/SOCS1/ZC3H12A/HMGB1/NFKBIZ	7
GO:0017038	protein import	15/486	206/18723	0.000328999	0.00629494	0.00496331	LMNA/TOMM7/HSPD1/HSP90AB1/HSPA8/HSP90AA1/TGFB1/RAN/ROMO1/CDKN1A/TOMM22/TOMM20/ZC3H12A/BCL3/NUTF2	15
GO:0046635	positive regulation of alpha-beta T cell activation	8/486	67/18723	0.000331235	0.00630867	0.00497413	HLA-A/ANXA1/RARA/SOCS1/CD55/XCL1/RHOA/NFKBIZ	8
GO:0002688	regulation of leukocyte chemotaxis	11/486	122/18723	0.00033855	0.00641854	0.00506076	MIF/SLAMF1/NBL1/DDT/RAC1/CCR6/HMGB1/GPSM3/XCL1/CALR/RAC2	11
GO:0009743	response to carbohydrate	17/486	253/18723	0.000348495	0.00657706	0.00518574	NME2/CYBA/RACK1/LGALS1/RAC1/CDKN1B/NAMPT/LDHA/RAP1B/FIS1/RHOA/SOD2/DYNLL1/ENSA/PIM3/ENY2/UCP2	17
GO:0038061	NIK/NF-kappaB signaling	12/486	143/18723	0.000358817	0.00674122	0.00531518	RPS3/TMSB4X/RELB/REL/PRDX1/LAPTM5/TRAF4/ZC3H12A/HMGB1/CALR/RHOA/BCL3	12
GO:0046637	regulation of alpha-beta T cell differentiation	8/486	68/18723	0.000367017	0.00683527	0.00538934	ANXA1/GATA3/RARA/SOCS1/ZC3H12A/HMGB1/RHOA/NFKBIZ	8
GO:0071706	tumor necrosis factor superfamily cytokine production	14/486	186/18723	0.000368762	0.00683527	0.00538934	MIF/CYBA/SLAMF1/HSPB1/HSPD1/DDT/RARA/ZC3H12A/HMGB1/IFNGR1/VSIR/ZFP36/BCL3/TSPO	14
GO:1903555	regulation of tumor necrosis factor superfamily cytokine production	14/486	186/18723	0.000368762	0.00683527	0.00538934	MIF/CYBA/SLAMF1/HSPB1/HSPD1/DDT/RARA/ZC3H12A/HMGB1/IFNGR1/VSIR/ZFP36/BCL3/TSPO	14
GO:0002831	regulation of response to biotic stimulus	20/486	327/18723	0.000374053	0.00690252	0.00544236	RPS19/HLA-A/CYBA/HLA-B/PCBP2/ISG15/NCR3/PPARG/HSPD1/HSP90AB1/HSP90AA1/CARD16/SOCS1/ZC3H12A/HMGB1/PRDX2/AKIRIN2/PAK2/CD55/PTPN1	20
GO:0010821	regulation of mitochondrion organization	12/486	144/18723	0.000382437	0.00699506	0.00551532	LMNA/CHCHD10/SQSTM1/PPARG/HSPA1A/SLC25A5/PRELID1/RALA/FIS1/VDAC1/PARK7/TSPO	12
GO:0046718	viral entry into host cell	12/486	144/18723	0.000382437	0.00699506	0.00551532	RPSA/IFITM1/SLAMF1/LGALS1/LY6E/HSPA1A/IFITM2/CD55/P4HB/SLC3A2/BSG/TNFRSF4	12
GO:0097237	cellular response to toxic substance	11/486	124/18723	0.000389544	0.0070938	0.00559317	GPX4/TXN/PRDX1/ALOX5AP/PRDX2/GLRX/PRDX6/FIS1/SOD1/SOD2/PARK7	11
GO:1903901	negative regulation of viral life cycle	5/486	25/18723	0.000398995	0.00723418	0.00570386	IFITM1/LY6E/PPIA/IFITM2/BST2	5
GO:0002685	regulation of leukocyte migration	15/486	210/18723	0.000403664	0.00728701	0.00574551	MIF/SLAMF1/ANXA1/RHOG/NBL1/DDT/RAC1/CCR6/HMGB1/TNFRSF18/GPSM3/XCL1/CALR/RHOA/RAC2	15
GO:0001906	cell killing	14/486	188/18723	0.000410943	0.00738629	0.00582379	RPL30/RPS19/GAPDH/HLA-A/HLA-B/B2M/NCR3/HSP90AB1/TUBB4B/PRDX1/ROMO1/CD55/XCL1/HMGN2	14
GO:0030099	myeloid cell differentiation	22/486	381/18723	0.00042903	0.00767815	0.00605391	NME2/RPS14/RPS19/B2M/RPS6/ISG15/GATA3/PPARG/RELB/HSPA1A/RARA/TGFB1/ALAS1/CDC42/SLC25A5/MYC/HMGB1/ANXA2/BATF/ZFP36/GLO1/JUNB	22
GO:0045580	regulation of T cell differentiation	12/486	146/18723	0.000433636	0.00772729	0.00609266	ANXA1/GATA3/RARA/SOCS1/ZC3H12A/PRELID1/HMGB1/PRDX2/VSIR/SOD1/RHOA/NFKBIZ	12
GO:0051084	'de novo' posttranslational protein folding	6/486	39/18723	0.00046748	0.0082248	0.00648492	HSPE1/HSPA1A/HSPA8/HSPA5/PTGES3/ST13	6
GO:2000516	positive regulation of CD4-positive, alpha-beta T cell activation	6/486	39/18723	0.00046748	0.0082248	0.00648492	ANXA1/RARA/SOCS1/CD55/XCL1/NFKBIZ	6
GO:0002824	positive regulation of adaptive immune response based on somatic recombination of immune receptors built from immunoglobulin superfamily domains	10/486	107/18723	0.000469479	0.0082248	0.00648492	HLA-A/SLAMF1/HLA-B/B2M/GATA3/HSPD1/TGFB1/CD55/XCL1/NFKBIZ	10
GO:0008637	apoptotic mitochondrial changes	10/486	107/18723	0.000469479	0.0082248	0.00648492	LMNA/CHCHD10/HSPD1/HSPA1A/SLC25A5/PRELID1/FIS1/SOD2/VDAC2/IFI6	10
GO:0031334	positive regulation of protein-containing complex assembly	16/486	237/18723	0.000489628	0.00854175	0.00673482	RPS3/RACK1/ISG15/HSPA1A/ARPC3/HSP90AA1/PFN1/RAC1/TGFB1/ARF6/ARPC1B/CDKN1B/RAP1B/GMFG/RHOA/PARK7	16
GO:0070997	neuron death	21/486	361/18723	0.000522606	0.00907891	0.00715836	GAPDH/RACK1/DDIT4/CHMP4B/GATA3/HSPD1/HSP90AB1/REL/NTRK1/HSPA5/UBB/CDC42/TNFRSF1B/NAMPT/FIS1/PRNP/SOD1/RHOA/SNX6/SOD2/PARK7	21
GO:0038066	p38MAPK cascade	7/486	55/18723	0.000525403	0.00908947	0.00716668	GADD45G/EZR/GADD45A/ZC3H12A/GADD45B/MAP2K3/ZFP36	7
GO:0051251	positive regulation of lymphocyte activation	21/486	362/18723	0.000541737	0.00920008	0.00725389	MIF/RPS3/HLA-A/SLAMF1/ANXA1/LGALS1/EFNB1/B2M/GATA3/HSPD1/RARA/TGFB1/CDKN1A/SOCS1/HMGB1/VSIR/CD55/XCL1/RHOA/NFKBIZ/TNFRSF4	21
GO:0030330	DNA damage response, signal transduction by p53 class mediator	8/486	72/18723	0.00054298	0.00920008	0.00725389	RPL26/MIF/NPM1/CDKN1A/CDKN1B/BATF/RPS27L/BCL3	8
GO:0071479	cellular response to ionizing radiation	8/486	72/18723	0.00054298	0.00920008	0.00725389	RPL26/EEF1D/CYBA/GATA3/HSPA5/CDKN1A/GADD45A/NAMPT	8
GO:0002456	T cell mediated immunity	10/486	109/18723	0.000544074	0.00920008	0.00725389	HLA-A/SLAMF1/HLA-B/B2M/GATA3/HSPD1/HMGB1/TNFRSF1B/CD55/XCL1	10
GO:0030901	midbrain development	9/486	90/18723	0.000545092	0.00920008	0.00725389	HSPA5/CDC42/CALM1/YWHAH/UQCRQ/RHOA/DYNLL1/COX6B1/CALM3	9
GO:0035304	regulation of protein dephosphorylation	9/486	90/18723	0.000545092	0.00920008	0.00725389	PPIA/HSP90AB1/HSP90B1/TGFB1/CALM1/YWHAB/ENSA/CSNK2B/CALM3	9
GO:0032386	regulation of intracellular transport	20/486	337/18723	0.000548397	0.00921839	0.00726833	INSIG1/OAZ1/EMD/EZR/TOMM7/HSP90AB1/TXN/TGFB1/RAN/CDC42/ZC3H12A/ANXA2/UBL5/ANP32B/FIS1/PTPN1/PRNP/RAC2/PARK7/NUTF2	20
GO:0070665	positive regulation of leukocyte proliferation	12/486	150/18723	0.000553521	0.00926702	0.00730667	MIF/RPS3/HLA-A/SLAMF1/ANXA1/EFNB1/CDKN1A/HMGB1/CD55/XCL1/TNFRSF4/BST2	12
GO:0046651	lymphocyte proliferation	18/486	288/18723	0.000561722	0.00935109	0.00737296	MIF/RPS3/HLA-A/SLAMF1/ANXA1/EFNB1/RPS6/HSPD1/CDKN1A/HMGB1/PRDX2/TNFRSF1B/VSIR/CD55/XCL1/PRNP/RAC2/TNFRSF4	18
GO:1901654	response to ketone	14/486	194/18723	0.000563048	0.00935109	0.00737296	CYBA/DDIT4/RPL27/PTGER2/FDX1/TGFB1/CDKN1A/GNG2/CALM1/CALR/PARK7/CSNK2B/CALM3/TSPO	14
GO:0002698	negative regulation of immune effector process	10/486	110/18723	0.000584899	0.0096753	0.00762858	RPS19/HLA-A/SLAMF1/ANXA1/HLA-B/TGFB1/ZC3H12A/CD55/XCL1/BST2	10
GO:0044409	entry into host	12/486	151/18723	0.000587499	0.00967974	0.00763209	RPSA/IFITM1/SLAMF1/LGALS1/LY6E/HSPA1A/IFITM2/CD55/P4HB/SLC3A2/BSG/TNFRSF4	12

## Sheet: c-Kit+ ILC2_c2
ID	Description	GeneRatio	BgRatio	pvalue	p.adjust	qvalue	geneID	Count
GO:0043484	regulation of RNA splicing	13/223	148/18723	2.53299e-08	5.37409e-05	4.08956e-05	AHNAK/FUS/RBM39/PIK3R1/CLK1/MBNL1/MBNL2/SF1/SLC38A2/HNRNPU/RBM25/ERN1/NCL	13
GO:1903131	mononuclear cell differentiation	21/223	426/18723	4.32781e-08	5.37409e-05	4.08956e-05	ZFP36L2/SLAMF1/PPARG/GATA3/RORA/ITK/NTRK1/ZBTB16/NFKBIZ/PIK3R1/KLF6/PTPRC/MYH9/IRF1/PTGER4/KIT/JUN/BATF/STAT3/RHOH/ITGA4	21
GO:0001819	positive regulation of cytokine production	22/223	467/18723	4.53748e-08	5.37409e-05	4.08956e-05	SLAMF1/GATA3/RORA/ITK/HSPD1/SLC7A5/DDX21/IFNGR1/PIK3R1/PTGS2/PTPRC/IRF1/RGCC/PDE4D/PTGER4/KIT/BATF/RIOK3/NR4A3/STAT3/AKIRIN2/HIF1A	22
GO:0008380	RNA splicing	21/223	434/18723	5.93822e-08	5.37409e-05	4.08956e-05	AHNAK/FUS/HNRNPA2B1/RBM39/DDX39B/PIK3R1/CLK1/SFPQ/MBNL1/MBNL2/KDM1A/SF1/SLC38A2/HNRNPU/RBM25/IVNS1ABP/ERN1/SRSF11/NCL/PRPF38B/TCERG1	21
GO:1903311	regulation of mRNA metabolic process	16/223	288/18723	3.84961e-07	0.00026668	0.000202938	ZFP36L2/VIM/FUS/ZC3HAV1/RBM39/MBNL1/MBNL2/SF1/PABPC4/CNOT6L/HNRNPU/AGO2/RBM25/NCL/ZFP36/TNRC6B	16
GO:0062012	regulation of small molecule metabolic process	17/223	334/18723	5.65722e-07	0.00026668	0.000202938	PPARG/RORA/NFKB1/STARD4/PTGS2/DDIT4/ELOVL5/RANBP2/KIT/CRY1/VCP/INSIG1/POR/NR4A3/STAT3/HIF1A/IRS2	17
GO:1902895	positive regulation of pri-miRNA transcription by RNA polymerase II	7/223	42/18723	5.85788e-07	0.00026668	0.000202938	NR3C1/PPARG/GATA3/KLF5/JUN/STAT3/HIF1A	7
GO:0030098	lymphocyte differentiation	18/223	374/18723	5.89349e-07	0.00026668	0.000202938	ZFP36L2/SLAMF1/GATA3/RORA/ITK/NTRK1/ZBTB16/NFKBIZ/PIK3R1/KLF6/PTPRC/IRF1/PTGER4/KIT/BATF/STAT3/RHOH/ITGA4	18
GO:0045598	regulation of fat cell differentiation	11/223	139/18723	8.79163e-07	0.000353619	0.000269096	ZFP36L2/PPARG/GATA3/RORA/KLF5/ZBTB16/STK4/PTGS2/HNRNPU/INSIG1/ZFP36	11
GO:0033002	muscle cell proliferation	14/223	248/18723	1.7336e-06	0.00057163	0.000434997	PPARG/TNFAIP3/HPGD/NAMPT/DDX39B/PTGS2/SF1/JUN/ERN1/CDKN1B/NR4A3/STAT3/JARID2/GNA13	14
GO:0048660	regulation of smooth muscle cell proliferation	12/223	180/18723	1.737e-06	0.00057163	0.000434997	PPARG/TNFAIP3/HPGD/NAMPT/DDX39B/PTGS2/SF1/JUN/ERN1/CDKN1B/NR4A3/GNA13	12
GO:0048659	smooth muscle cell proliferation	12/223	184/18723	2.18699e-06	0.000659743	0.000502049	PPARG/TNFAIP3/HPGD/NAMPT/DDX39B/PTGS2/SF1/JUN/ERN1/CDKN1B/NR4A3/GNA13	12
GO:0046631	alpha-beta T cell activation	11/223	156/18723	2.74292e-06	0.000763797	0.000581232	GATA3/RORA/ITK/ZBTB16/NFKBIZ/PTPRC/IRF1/HSPH1/PTGER4/BATF/STAT3	11
GO:1902893	regulation of pri-miRNA transcription by RNA polymerase II	7/223	54/18723	3.40652e-06	0.000843392	0.000641802	NR3C1/PPARG/GATA3/KLF5/JUN/STAT3/HIF1A	7
GO:0046777	protein autophosphorylation	13/223	227/18723	3.49472e-06	0.000843392	0.000641802	GRK5/ITK/NTRK1/STK4/PTPRC/CLK1/PAK2/STK17B/KIT/ERN1/PRKX/OXSR1/STK24	13
GO:0061614	pri-miRNA transcription by RNA polymerase II	7/223	55/18723	3.86411e-06	0.000874256	0.000665289	NR3C1/PPARG/GATA3/KLF5/JUN/STAT3/HIF1A	7
GO:0070482	response to oxygen levels	16/223	347/18723	4.40025e-06	0.000936995	0.000713032	MALAT1/RORA/HSPD1/LMNA/ATP1B1/NAMPT/PTGS2/RGCC/DDIT4/FAS/NPEPPS/AQP3/CDKN1B/HSP90B1/PLK3/HIF1A	16
GO:0046632	alpha-beta T cell differentiation	9/223	112/18723	7.79563e-06	0.00148649	0.00113118	GATA3/RORA/ITK/ZBTB16/NFKBIZ/IRF1/PTGER4/BATF/STAT3	9
GO:0036293	response to decreased oxygen levels	15/223	322/18723	7.80202e-06	0.00148649	0.00113118	MALAT1/RORA/HSPD1/LMNA/ATP1B1/NAMPT/PTGS2/RGCC/DDIT4/NPEPPS/AQP3/CDKN1B/HSP90B1/PLK3/HIF1A	15
GO:0062013	positive regulation of small molecule metabolic process	10/223	143/18723	8.43747e-06	0.00152718	0.00116215	PPARG/STARD4/PTGS2/ELOVL5/VCP/POR/NR4A3/STAT3/HIF1A/IRS2	10
GO:0071453	cellular response to oxygen levels	11/223	177/18723	9.24294e-06	0.00159331	0.00121247	MALAT1/RORA/LMNA/NAMPT/PTGS2/RGCC/FAS/NPEPPS/AQP3/PLK3/HIF1A	11
GO:0014074	response to purine-containing compound	10/223	148/18723	1.14251e-05	0.0017323	0.00131824	AHR/EZR/HSPD1/HSPA5/PTGS2/KDM1A/RAPGEF2/JUN/HMGCS1/HSP90B1	10
GO:1904705	regulation of vascular associated smooth muscle cell proliferation	8/223	90/18723	1.19701e-05	0.0017323	0.00131824	PPARG/HPGD/DDX39B/JUN/ERN1/CDKN1B/NR4A3/GNA13	8
GO:1990874	vascular associated smooth muscle cell proliferation	8/223	91/18723	1.29908e-05	0.0017323	0.00131824	PPARG/HPGD/DDX39B/JUN/ERN1/CDKN1B/NR4A3/GNA13	8
GO:0072594	establishment of protein localization to organelle	17/223	422/18723	1.30683e-05	0.0017323	0.00131824	IL10RA/TNFAIP3/STAM/HSPD1/LMNA/HSPA5/PIK3R1/PTGS2/NPEPPS/RANBP2/PPP1R10/SPCS2/STAT3/SEC61B/FLNA/UBE2D3/NUP58	17
GO:0045600	positive regulation of fat cell differentiation	7/223	66/18723	1.32727e-05	0.0017323	0.00131824	PPARG/KLF5/ZBTB16/STK4/PTGS2/HNRNPU/ZFP36	7
GO:0030217	T cell differentiation	13/223	257/18723	1.33719e-05	0.0017323	0.00131824	ZFP36L2/GATA3/RORA/ITK/ZBTB16/NFKBIZ/PTPRC/IRF1/PTGER4/KIT/BATF/STAT3/RHOH	13
GO:0032386	regulation of intracellular transport	15/223	337/18723	1.3399e-05	0.0017323	0.00131824	PGAP1/EZR/PIK3R1/PTGS2/NDEL1/NPEPPS/INSIG1/YWHAE/PLK3/FLNA/UBE2D3/BORCS5/NUP58/PTPN1/DYNC1H1	15
GO:0030099	myeloid cell differentiation	16/223	381/18723	1.41895e-05	0.00177124	0.00134787	PPARG/GATA3/ZBTB16/ALAS1/PIK3R1/MYH9/KMT2E/PABPC4/KIT/JUN/BATF/PRKX/ZFP36/STAT3/HIF1A/SMAP1	16
GO:0032703	negative regulation of interleukin-2 production	5/223	27/18723	1.49402e-05	0.00180279	0.00137188	GATA3/TNFAIP3/EZR/PTPRC/ZFP36	5
GO:0001666	response to hypoxia	14/223	307/18723	1.99592e-05	0.0023007	0.00175078	MALAT1/RORA/HSPD1/LMNA/ATP1B1/PTGS2/RGCC/DDIT4/NPEPPS/AQP3/CDKN1B/HSP90B1/PLK3/HIF1A	14
GO:0045444	fat cell differentiation	12/223	229/18723	2.03377e-05	0.0023007	0.00175078	ZFP36L2/PPARG/GATA3/RORA/KLF5/ZBTB16/STK4/PTGS2/HNRNPU/INSIG1/NR4A3/ZFP36	12
GO:0036294	cellular response to decreased oxygen levels	10/223	161/18723	2.37859e-05	0.00251704	0.00191541	MALAT1/RORA/LMNA/NAMPT/PTGS2/RGCC/NPEPPS/AQP3/PLK3/HIF1A	10
GO:1900153	positive regulation of nuclear-transcribed mRNA catabolic process, deadenylation-dependent decay	4/223	15/18723	2.41212e-05	0.00251704	0.00191541	ZFP36L2/AGO2/ZFP36/TNRC6B	4
GO:0060964	regulation of gene silencing by miRNA	6/223	49/18723	2.43361e-05	0.00251704	0.00191541	NEAT1/PPARG/AGO2/ZFP36/STAT3/TNRC6B	6
GO:2001233	regulation of apoptotic signaling pathway	15/223	356/18723	2.54324e-05	0.00255737	0.0019461	ITGAV/TNFAIP3/STK4/LMNA/USP47/PTGS2/PTPRC/MCL1/SFPQ/KDM1A/PAK2/FAS/IVNS1ABP/HIF1A/PTPN1	15
GO:0046683	response to organophosphorus	9/223	131/18723	2.75973e-05	0.00266954	0.00203146	AHR/EZR/HSPD1/HSPA5/PTGS2/KDM1A/RAPGEF2/JUN/HSP90B1	9
GO:1901653	cellular response to peptide	15/223	359/18723	2.80228e-05	0.00266954	0.00203146	PPARG/KLF5/VIM/NFKB1/NAMPT/PIK3R1/NDEL1/INSIG1/POR/NR4A3/STAT3/ITGA4/PTPN1/IRS2/ABCC1	15
GO:0061013	regulation of mRNA catabolic process	10/223	166/18723	3.0941e-05	0.00280295	0.00213298	ZFP36L2/VIM/FUS/ZC3HAV1/PABPC4/CNOT6L/HNRNPU/AGO2/ZFP36/TNRC6B	10
GO:0071496	cellular response to external stimulus	14/223	320/18723	3.15254e-05	0.00280295	0.00213298	NFKB1/NAMPT/GABARAPL1/HSPA5/PTGS2/PTPRC/IRF1/FAS/SLC38A2/PTGER4/JUN/AQP3/STK24/ITGA4	14
GO:0032388	positive regulation of intracellular transport	11/223	202/18723	3.17462e-05	0.00280295	0.00213298	PGAP1/EZR/PIK3R1/PTGS2/NPEPPS/YWHAE/PLK3/FLNA/UBE2D3/BORCS5/DYNC1H1	11
GO:0060147	regulation of posttranscriptional gene silencing	6/223	52/18723	3.4392e-05	0.00294672	0.00224239	NEAT1/PPARG/AGO2/ZFP36/STAT3/TNRC6B	6
GO:0009314	response to radiation	17/223	456/18723	3.50025e-05	0.00294672	0.00224239	GATA3/NTRK1/USP47/NAMPT/HSPA5/PIK3R1/PTGS2/PTPRC/KDM1A/KIT/JUN/CRY1/HMGCS1/BHLHE40/PLK3/HIF1A/RNF168	17
GO:0060966	regulation of gene silencing by RNA	6/223	53/18723	3.84001e-05	0.00315928	0.00240414	NEAT1/PPARG/AGO2/ZFP36/STAT3/TNRC6B	6
GO:0051235	maintenance of location	14/223	327/18723	3.99183e-05	0.0032112	0.00244365	PPARG/ITGAV/NFKB1/STARD4/HSPA5/ABHD5/PTPRC/PDE4D/HNRNPU/PLIN2/CRY1/INSIG1/HSP90B1/FLNA	14
GO:0009410	response to xenobiotic stimulus	17/223	462/18723	4.12096e-05	0.00324302	0.00246786	GATA3/RORA/NTRK1/DUSP6/AHR/HSPD1/USP47/HSPA5/PTGS2/RNF149/JUN/PLIN2/CDKN1B/POR/HMGCS1/STAT3/ABCC1	17
GO:0071214	cellular response to abiotic stimulus	14/223	331/18723	4.5545e-05	0.00343485	0.00261384	GATA3/NFKB1/USP47/NAMPT/HSPA5/PIK3R1/PTGS2/IRF1/KDM1A/FAS/SLC38A2/PTGER4/CRY1/OXSR1	14
GO:0104004	cellular response to environmental stimulus	14/223	331/18723	4.5545e-05	0.00343485	0.00261384	GATA3/NFKB1/USP47/NAMPT/HSPA5/PIK3R1/PTGS2/IRF1/KDM1A/FAS/SLC38A2/PTGER4/CRY1/OXSR1	14
GO:0002764	immune response-regulating signaling pathway	17/223	468/18723	4.83737e-05	0.00357373	0.00271953	USP15/GATA3/ITK/TNFAIP3/NFKBIZ/EZR/HSPD1/PTPRC/IRF1/PDE4D/PAK2/SLC39A10/KIT/RIOK3/RTN4/KLHL6/NR4A3	17
GO:0042113	B cell activation	14/223	334/18723	5.02094e-05	0.00363516	0.00276628	ZFP36L2/TNFAIP3/NTRK1/AHR/HSPD1/PIK3R1/KLF6/PTPRC/SLC39A10/KIT/BATF/ITGA4/RNF168/IRS2	14
GO:1900151	regulation of nuclear-transcribed mRNA catabolic process, deadenylation-dependent decay	4/223	18/18723	5.25761e-05	0.00373187	0.00283987	ZFP36L2/AGO2/ZFP36/TNRC6B	4
GO:0042326	negative regulation of phosphorylation	15/223	385/18723	6.21737e-05	0.00432825	0.0032937	PPARG/TNFAIP3/DUSP6/SPAG9/PTPRC/DDIT4/PDE4D/PAK2/HNRNPU/CDKN1B/STAT3/GADD45B/PRKAR2A/PTPN1/IRS2	15
GO:0006913	nucleocytoplasmic transport	13/223	301/18723	6.90163e-05	0.00462665	0.00352077	BACH2/AKAP13/HNRNPA2B1/LMNA/DDX39B/PIK3R1/PTGS2/RANBP2/PPP1R10/STAT3/YWHAE/FLNA/NUP58	13
GO:0051169	nuclear transport	13/223	301/18723	6.90163e-05	0.00462665	0.00352077	BACH2/AKAP13/HNRNPA2B1/LMNA/DDX39B/PIK3R1/PTGS2/RANBP2/PPP1R10/STAT3/YWHAE/FLNA/NUP58	13
GO:0050673	epithelial cell proliferation	16/223	437/18723	7.37788e-05	0.00485598	0.00369529	PPARG/GATA3/TNFAIP3/RGCC/B4GALT1/KDM5B/KIT/RTN4/ERN1/CDKN1B/PRKX/NR4A3/ZFP36/STAT3/ITGA4/HIF1A	16
GO:0045834	positive regulation of lipid metabolic process	9/223	149/18723	7.56836e-05	0.0048924	0.00372301	PPARG/STARD4/ABHD5/PTGS2/ELOVL5/KIT/POR/NR4A3/IRS2	9
GO:0002274	myeloid leukocyte activation	11/223	223/18723	7.78398e-05	0.0049196	0.0037437	SLAMF1/RORA/HSPD1/NAMPT/IFNGR1/PTPRC/KMT2E/KIT/BATF/NR4A3/RHOH	11
GO:0042110	T cell activation	17/223	487/18723	7.88698e-05	0.0049196	0.0037437	ZFP36L2/SLAMF1/GATA3/RORA/ITK/ZBTB16/NFKBIZ/HSPD1/PTPRC/MYH9/IRF1/HSPH1/PTGER4/KIT/BATF/STAT3/RHOH	17
GO:0019915	lipid storage	7/223	87/18723	8.06202e-05	0.0049196	0.0037437	PPARG/ITGAV/NFKB1/STARD4/ABHD5/PLIN2/CRY1	7
GO:0045936	negative regulation of phosphate metabolic process	16/223	441/18723	8.20637e-05	0.0049196	0.0037437	PPARG/TNFAIP3/DUSP6/SPAG9/PTPRC/DDIT4/PDE4D/PAK2/HNRNPU/CDKN1B/STAT3/YWHAE/GADD45B/PRKAR2A/PTPN1/IRS2	16
GO:0071456	cellular response to hypoxia	9/223	151/18723	8.38815e-05	0.0049196	0.0037437	MALAT1/RORA/LMNA/PTGS2/RGCC/NPEPPS/AQP3/PLK3/HIF1A	9
GO:0010563	negative regulation of phosphorus metabolic process	16/223	442/18723	8.42584e-05	0.0049196	0.0037437	PPARG/TNFAIP3/DUSP6/SPAG9/PTPRC/DDIT4/PDE4D/PAK2/HNRNPU/CDKN1B/STAT3/YWHAE/GADD45B/PRKAR2A/PTPN1/IRS2	16
GO:0032623	interleukin-2 production	6/223	62/18723	9.40621e-05	0.00524527	0.00399153	GATA3/TNFAIP3/EZR/PTPRC/PDE4D/ZFP36	6
GO:0032663	regulation of interleukin-2 production	6/223	62/18723	9.40621e-05	0.00524527	0.00399153	GATA3/TNFAIP3/EZR/PTPRC/PDE4D/ZFP36	6
GO:0045923	positive regulation of fatty acid metabolic process	5/223	39/18723	9.48583e-05	0.00524527	0.00399153	PPARG/PTGS2/ELOVL5/NR4A3/IRS2	5
GO:0030218	erythrocyte differentiation	8/223	120/18723	9.5632e-05	0.00524527	0.00399153	GATA3/ALAS1/KMT2E/KIT/ZFP36/STAT3/HIF1A/SMAP1	8
GO:0033157	regulation of intracellular protein transport	11/223	229/18723	9.86179e-05	0.00532831	0.00405472	PIK3R1/PTGS2/NDEL1/NPEPPS/INSIG1/YWHAE/PLK3/FLNA/UBE2D3/NUP58/PTPN1	11
GO:0006402	mRNA catabolic process	11/223	232/18723	0.000110672	0.00589166	0.00448342	ZFP36L2/VIM/FUS/ZC3HAV1/PABPC4/CNOT6L/HNRNPU/AGO2/ERN1/ZFP36/TNRC6B	11
GO:0043488	regulation of mRNA stability	9/223	158/18723	0.000118694	0.00616237	0.00468942	ZFP36L2/VIM/FUS/PABPC4/CNOT6L/HNRNPU/AGO2/ZFP36/TNRC6B	9
GO:0002366	leukocyte activation involved in immune response	12/223	275/18723	0.000119162	0.00616237	0.00468942	SLAMF1/GATA3/RORA/NFKBIZ/HSPD1/PTPRC/PTGER4/KIT/BATF/NR4A3/STAT3/RNF168	12
GO:0002720	positive regulation of cytokine production involved in immune response	6/223	65/18723	0.000122691	0.00625551	0.0047603	SLAMF1/GATA3/SLC7A5/DDX21/KIT/NR4A3	6
GO:0051170	import into nucleus	9/223	159/18723	0.000124534	0.0062613	0.00476471	BACH2/LMNA/PIK3R1/PTGS2/RANBP2/PPP1R10/STAT3/FLNA/NUP58	9
GO:0042093	T-helper cell differentiation	6/223	66/18723	0.000133633	0.00653717	0.00497463	GATA3/RORA/NFKBIZ/PTGER4/BATF/STAT3	6
GO:1905953	negative regulation of lipid localization	6/223	66/18723	0.000133633	0.00653717	0.00497463	PPARG/ITGAV/NFKB1/ABHD5/CRY1/IRS2	6
GO:0002263	cell activation involved in immune response	12/223	279/18723	0.000136423	0.00658469	0.0050108	SLAMF1/GATA3/RORA/NFKBIZ/HSPD1/PTPRC/PTGER4/KIT/BATF/NR4A3/STAT3/RNF168	12
GO:0043434	response to peptide hormone	15/223	414/18723	0.000139131	0.00662704	0.00504302	PPARG/NFKB1/BTG1/STAT4/PIK3R1/PTGS2/NDEL1/CRY1/INSIG1/CDKN1B/POR/NR4A3/STAT3/PTPN1/IRS2	15
GO:1903039	positive regulation of leukocyte cell-cell adhesion	11/223	239/18723	0.000143779	0.00673856	0.00512789	SLAMF1/GATA3/ZBTB16/NFKBIZ/HSPD1/NFAT5/PTPRC/HSPH1/NR4A3/RHOH/ITGA4	11
GO:0035162	embryonic hemopoiesis	4/223	23/18723	0.000145195	0.00673856	0.00512789	GATA3/STK4/KIT/HIF1A	4
GO:0002294	CD4-positive, alpha-beta T cell differentiation involved in immune response	6/223	68/18723	0.000157831	0.00707607	0.00538473	GATA3/RORA/NFKBIZ/PTGER4/BATF/STAT3	6
GO:0032922	circadian regulation of gene expression	6/223	68/18723	0.000157831	0.00707607	0.00538473	RORA/AHR/NAMPT/HNRNPU/CRY1/BHLHE40	6
GO:0034101	erythrocyte homeostasis	8/223	129/18723	0.000158332	0.00707607	0.00538473	GATA3/ALAS1/KMT2E/KIT/ZFP36/STAT3/HIF1A/SMAP1	8
GO:2001243	negative regulation of intrinsic apoptotic signaling pathway	7/223	98/18723	0.000170918	0.00737634	0.00561323	USP47/PTGS2/MCL1/KDM1A/IVNS1ABP/HIF1A/PTPN1	7
GO:0002287	alpha-beta T cell activation involved in immune response	6/223	69/18723	0.000171164	0.00737634	0.00561323	GATA3/RORA/NFKBIZ/PTGER4/BATF/STAT3	6
GO:0002293	alpha-beta T cell differentiation involved in immune response	6/223	69/18723	0.000171164	0.00737634	0.00561323	GATA3/RORA/NFKBIZ/PTGER4/BATF/STAT3	6
GO:0019216	regulation of lipid metabolic process	13/223	331/18723	0.000177859	0.00757471	0.00576418	PPARG/RORA/NFKB1/STARD4/ABHD5/PTGS2/SF1/ELOVL5/KIT/INSIG1/POR/NR4A3/IRS2	13
GO:0097193	intrinsic apoptotic signaling pathway	12/223	288/18723	0.000183257	0.00771383	0.00587004	USP47/PIK3R1/PTGS2/MCL1/SFPQ/DDIT4/KDM1A/IVNS1ABP/ERN1/STK24/HIF1A/PTPN1	12
GO:0019218	regulation of steroid metabolic process	7/223	100/18723	0.000193839	0.00785742	0.00597931	RORA/NFKB1/STARD4/SF1/KIT/INSIG1/POR	7
GO:0031331	positive regulation of cellular catabolic process	15/223	427/18723	0.000194635	0.00785742	0.00597931	ZFP36L2/TNFAIP3/EZR/ZC3HAV1/ABHD5/CNOT6L/AGO2/VCP/RNF19A/ZFP36/TNRC6B/PLK3/HIF1A/PTPN1/IRS2	15
GO:0032103	positive regulation of response to external stimulus	15/223	427/18723	0.000194635	0.00785742	0.00597931	USP15/NEAT1/SLAMF1/NFKBIZ/HSPD1/PTGS2/SFPQ/PAK2/NDEL1/PTGER4/RIOK3/OXSR1/AKIRIN2/FLNA/ABCC1	15
GO:0034504	protein localization to nucleus	12/223	290/18723	0.00019535	0.00785742	0.00597931	ZBTB16/LMNA/PIK3R1/PTGS2/HNRNPU/RANBP2/DNAJB6/PPP1R10/STAT3/YWHAE/FLNA/NUP58	12
GO:0048024	regulation of mRNA splicing, via spliceosome	7/223	101/18723	0.000206197	0.00811713	0.00617695	RBM39/MBNL1/MBNL2/SF1/HNRNPU/RBM25/NCL	7
GO:0043487	regulation of RNA stability	9/223	170/18723	0.000206292	0.00811713	0.00617695	ZFP36L2/VIM/FUS/PABPC4/CNOT6L/HNRNPU/AGO2/ZFP36/TNRC6B	9
GO:0007623	circadian rhythm	10/223	210/18723	0.000218925	0.0085216	0.00648474	PPARG/RORA/NTRK1/AHR/NAMPT/SFPQ/HNRNPU/JUN/CRY1/BHLHE40	10
GO:0045786	negative regulation of cell cycle	14/223	385/18723	0.000223642	0.00861259	0.00655398	ZFP36L2/TSPYL2/GATA3/TNFAIP3/HPGD/BTG1/USP47/DDX39B/PTGS2/RGCC/CRY1/CDKN1B/PPP1R10/PLK3	14
GO:0046677	response to antibiotic	5/223	47/18723	0.000233923	0.0089137	0.00678312	HSPA5/KDM1A/KDM5B/CDKN1B/EHMT1	5
GO:0006986	response to unfolded protein	8/223	137/18723	0.000239391	0.00902705	0.00686937	HSPD1/HSPA5/PIK3R1/HSPH1/VCP/ERN1/EDEM3/PTPN1	8
GO:0048661	positive regulation of smooth muscle cell proliferation	7/223	104/18723	0.000247131	0.00917004	0.00697819	HPGD/NAMPT/DDX39B/PTGS2/JUN/ERN1/NR4A3	7
GO:0045785	positive regulation of cell adhesion	15/223	437/18723	0.000249525	0.00917004	0.00697819	SLAMF1/GATA3/ITGAV/ZBTB16/NFKBIZ/STK4/HSPD1/NFAT5/PTPRC/HSPH1/NR4A3/ARHGEF7/RHOH/ITGA4/FLNA	15
GO:0048511	rhythmic process	12/223	298/18723	0.000250783	0.00917004	0.00697819	PPARG/RORA/NTRK1/AHR/NAMPT/HSPA5/SFPQ/HNRNPU/KDM5B/JUN/CRY1/BHLHE40	12
GO:0034975	protein folding in endoplasmic reticulum	3/223	11/18723	0.000256317	0.00926919	0.00705364	HSPA5/ERO1B/HSP90B1	3
GO:0061647	histone H3-K9 modification	5/223	48/18723	0.000258615	0.00926919	0.00705364	GATA3/LMNA/KDM1A/JARID2/EHMT1	5
GO:0002292	T cell differentiation involved in immune response	6/223	75/18723	0.000270973	0.0095235	0.00724717	GATA3/RORA/NFKBIZ/PTGER4/BATF/STAT3	6
GO:0008088	axo-dendritic transport	6/223	75/18723	0.000270973	0.0095235	0.00724717	SFPQ/NDEL1/HNRNPU/HIF1A/BORCS5/DYNC1H1	6
GO:0009896	positive regulation of catabolic process	16/223	492/18723	0.000285177	0.00983392	0.00748339	ZFP36L2/TNFAIP3/EZR/ZC3HAV1/ABHD5/CNOT6L/AGO2/VCP/RNF19A/CDKN1B/ZFP36/TNRC6B/PLK3/HIF1A/PTPN1/IRS2	16
GO:1904707	positive regulation of vascular associated smooth muscle cell proliferation	5/223	49/18723	0.000285238	0.00983392	0.00748339	HPGD/DDX39B/JUN/ERN1/NR4A3	5

## Sheet: ILC3_c1
ID	Description	GeneRatio	BgRatio	pvalue	p.adjust	qvalue	geneID	Count
GO:1903131	mononuclear cell differentiation	34/245	426/18723	2.45379e-17	5.95186e-14	4.44215e-14	KIT/IL23R/IL4I1/RORC/IRF4/TNFSF13B/HDAC9/DLL1/CD83/PTPN22/NOTCH2/PIK3CD/FES/PLCG2/NFKBID/CSF2/CTNNB1/ZMIZ1/TCF7/IRF2BP2/IL7R/ATM/CHD7/RBPJ/PTGER4/PRKDC/DOCK10/RIPK2/IL18R1/ZBTB1/RUNX2/PNP/HECTD1/ZFP36L1	34
GO:0030098	lymphocyte differentiation	32/245	374/18723	3.06244e-17	5.95186e-14	4.44215e-14	KIT/IL23R/IL4I1/RORC/IRF4/TNFSF13B/HDAC9/DLL1/CD83/PTPN22/NOTCH2/PIK3CD/PLCG2/NFKBID/CTNNB1/ZMIZ1/TCF7/IRF2BP2/IL7R/ATM/CHD7/RBPJ/PTGER4/PRKDC/DOCK10/RIPK2/IL18R1/ZBTB1/RUNX2/PNP/HECTD1/ZFP36L1	32
GO:0042110	T cell activation	34/245	487/18723	1.39278e-15	1.80458e-12	1.34684e-12	KIT/IL23R/IL4I1/RORC/GSN/CASP3/IRF4/TNFSF13B/ICOS/CD83/TNFSF11/MAP3K8/PTPN22/PIK3CD/NFKBID/CTNNB1/ZMIZ1/HLA-DQB1/PRKAR1A/TCF7/IL7R/CD81/CHD7/PTGER4/PRKDC/RIPK2/IL18R1/ZBTB1/RUNX2/PRNP/ICAM1/PNP/CD44/ZFP36L1	34
GO:1903706	regulation of hemopoiesis	26/245	367/18723	2.74789e-12	2.67026e-09	1.99295e-09	LIF/IL23R/IL4I1/IRF4/DLL1/CD83/FOS/TNFSF11/CA2/NOTCH2/FES/BRD1/NFKBID/CTNNB1/ZMIZ1/TCF7/IL7R/ZFP36/PRKDC/RIPK2/NFKBIA/ZBTB1/PNP/CTR9/STAT1/ZFP36L1	26
GO:0030217	T cell differentiation	22/245	257/18723	3.50106e-12	2.72172e-09	2.03135e-09	KIT/IL23R/IL4I1/RORC/IRF4/CD83/PTPN22/PIK3CD/NFKBID/CTNNB1/ZMIZ1/TCF7/IL7R/CHD7/PTGER4/PRKDC/RIPK2/IL18R1/ZBTB1/RUNX2/PNP/ZFP36L1	22
GO:1902107	positive regulation of leukocyte differentiation	17/245	157/18723	2.66957e-11	1.48238e-08	1.10637e-08	LIF/IL23R/IL4I1/CD83/FOS/TNFSF11/CA2/NOTCH2/FES/NFKBID/ZMIZ1/IL7R/PRKDC/RIPK2/ZBTB1/PNP/ZFP36L1	17
GO:1903708	positive regulation of hemopoiesis	17/245	157/18723	2.66957e-11	1.48238e-08	1.10637e-08	LIF/IL23R/IL4I1/CD83/FOS/TNFSF11/CA2/NOTCH2/FES/NFKBID/ZMIZ1/IL7R/PRKDC/RIPK2/ZBTB1/PNP/ZFP36L1	17
GO:0030099	myeloid cell differentiation	25/245	381/18723	3.88874e-11	1.88944e-08	1.41018e-08	KIT/LIF/IL23R/CASP3/IRF4/DLL1/FOS/TNFSF11/CA2/NOTCH2/PIK3CD/FES/BRD1/CSF2/CTNNB1/CD81/HIPK2/ZFP36/RBPJ/PRKDC/NFKBIA/SNRK/CTR9/STAT1/ZFP36L1	25
GO:1903037	regulation of leukocyte cell-cell adhesion	23/245	336/18723	1.06026e-10	4.57913e-08	3.41763e-08	IL23R/IL4I1/CASP3/TNFSF13B/ICOS/NR4A3/CD83/TNFSF11/MAP3K8/PTPN22/NFKBID/ZMIZ1/HLA-DQB1/KLF4/PRKAR1A/IL7R/CD81/RIPK2/ZBTB1/PRNP/ICAM1/PNP/CD44	23
GO:0007159	leukocyte cell-cell adhesion	24/245	371/18723	1.30899e-10	4.71641e-08	3.52008e-08	IL23R/IL4I1/CASP3/TNFSF13B/ICOS/NR4A3/CD83/TNFSF11/MAP3K8/PTPN22/NFKBID/ZMIZ1/HLA-DQB1/KLF4/PRKAR1A/IL7R/CD81/PECAM1/RIPK2/ZBTB1/PRNP/ICAM1/PNP/CD44	24
GO:0045785	positive regulation of cell adhesion	26/245	437/18723	1.33472e-10	4.71641e-08	3.52008e-08	LIF/IL23R/IL4I1/TGM2/TNFSF13B/ICOS/NR4A3/CD83/TNFSF11/MAP3K8/PTPN22/NFKBID/NRP1/DOCK5/ZMIZ1/HLA-DQB1/IL7R/CD81/ATM/RIPK2/ZBTB1/ICAM1/UTRN/PNP/ARHGEF7/CD44	26
GO:1903039	positive regulation of leukocyte cell-cell adhesion	19/245	239/18723	3.90766e-10	1.26575e-07	9.44693e-08	IL23R/IL4I1/TNFSF13B/ICOS/NR4A3/CD83/TNFSF11/MAP3K8/PTPN22/NFKBID/ZMIZ1/HLA-DQB1/IL7R/CD81/RIPK2/ZBTB1/ICAM1/PNP/CD44	19
GO:0050863	regulation of T cell activation	22/245	329/18723	4.2919e-10	1.28328e-07	9.57772e-08	IL23R/IL4I1/CASP3/IRF4/TNFSF13B/ICOS/CD83/TNFSF11/MAP3K8/PTPN22/NFKBID/CTNNB1/ZMIZ1/HLA-DQB1/PRKAR1A/TCF7/IL7R/CD81/RIPK2/ZBTB1/PRNP/PNP	22
GO:1902105	regulation of leukocyte differentiation	20/245	279/18723	8.26596e-10	2.29499e-07	1.71286e-07	LIF/IL23R/IL4I1/IRF4/CD83/FOS/TNFSF11/CA2/NOTCH2/FES/NFKBID/CTNNB1/ZMIZ1/TCF7/IL7R/PRKDC/RIPK2/ZBTB1/PNP/ZFP36L1	20
GO:0042113	B cell activation	21/245	334/18723	3.28737e-09	8.51868e-07	6.3579e-07	KIT/IL4I1/CASP3/TNFSF13B/HDAC9/DLL1/NOTCH2/PIK3CD/PLCG2/TNFAIP3/TRBC1/SKAP2/IRF2BP2/IL7R/AHR/CD81/ATM/RBPJ/PRKDC/DOCK10/ZFP36L1	21
GO:0032496	response to lipopolysaccharide	21/245	343/18723	5.26683e-09	1.27951e-06	9.54959e-07	IL23R/CASP3/FOS/ABCA1/NR4A1/PTPN22/F2R/PLCG2/TNFAIP3/CSF2/PDE4B/RPS6KA3/ZFP36/PTGER4/RIPK2/NFKBIA/ICAM1/CD96/CTR9/PTGS2/JUND	21
GO:0022409	positive regulation of cell-cell adhesion	19/245	284/18723	6.92683e-09	1.48425e-06	1.10776e-06	IL23R/IL4I1/TNFSF13B/ICOS/NR4A3/CD83/TNFSF11/MAP3K8/PTPN22/NFKBID/ZMIZ1/HLA-DQB1/IL7R/CD81/RIPK2/ZBTB1/ICAM1/PNP/CD44	19
GO:0032623	interleukin-2 production	10/245	62/18723	7.25513e-09	1.48425e-06	1.10776e-06	IRF4/CD83/PLCG2/TNFAIP3/PDE4B/MAP3K7/ZFP36/RIPK2/PRNP/PNP	10
GO:0032663	regulation of interleukin-2 production	10/245	62/18723	7.25513e-09	1.48425e-06	1.10776e-06	IRF4/CD83/PLCG2/TNFAIP3/PDE4B/MAP3K7/ZFP36/RIPK2/PRNP/PNP	10
GO:0002237	response to molecule of bacterial origin	21/245	363/18723	1.42244e-08	2.76451e-06	2.06328e-06	IL23R/CASP3/FOS/ABCA1/NR4A1/PTPN22/F2R/PLCG2/TNFAIP3/CSF2/PDE4B/RPS6KA3/ZFP36/PTGER4/RIPK2/NFKBIA/ICAM1/CD96/CTR9/PTGS2/JUND	21
GO:0045637	regulation of myeloid cell differentiation	16/245	210/18723	1.80938e-08	3.34907e-06	2.49957e-06	LIF/IL23R/DLL1/FOS/TNFSF11/CA2/NOTCH2/FES/BRD1/CTNNB1/ZFP36/PRKDC/NFKBIA/CTR9/STAT1/ZFP36L1	16
GO:0002697	regulation of immune effector process	20/245	339/18723	2.30079e-08	4.0267e-06	3.00531e-06	KIT/IL1R1/IL23R/IL4I1/IRF4/NR4A3/PTPN22/FES/PLCG2/NFKBID/IL7R/AHR/CD81/MAP3K7/PRKDC/RIPK2/IL18R1/ZBTB1/ICAM1/CD96	20
GO:0002366	leukocyte activation involved in immune response	18/245	275/18723	2.45173e-08	4.0267e-06	3.00531e-06	KIT/IL23R/RORC/IRF4/DLL1/NR4A3/NOTCH2/PIK3CD/FES/PLCG2/NFKBID/CBL/CD81/PTGER4/DOCK10/RIPK2/IL18R1/ICAM1	18
GO:0018108	peptidyl-tyrosine phosphorylation	21/245	375/18723	2.49812e-08	4.0267e-06	3.00531e-06	KIT/LIF/IL23R/FES/PLCG2/CSF2/MAP2K6/NRP1/TTN/CBL/AREG/CD81/TYK2/PECAM1/HIPK2/HIPK1/RIPK2/PRNP/ICAM1/PPP2CA/CD44	21
GO:0022407	regulation of cell-cell adhesion	23/245	448/18723	2.64194e-08	4.0267e-06	3.00531e-06	IL23R/IL4I1/CASP3/TNFSF13B/ICOS/NR4A3/CD83/TNFSF11/MAP3K8/PTPN22/NFKBID/ZMIZ1/HLA-DQB1/KLF4/PRKAR1A/IL7R/CD81/RIPK2/ZBTB1/PRNP/ICAM1/PNP/CD44	23
GO:0050870	positive regulation of T cell activation	16/245	216/18723	2.69344e-08	4.0267e-06	3.00531e-06	IL23R/IL4I1/TNFSF13B/ICOS/CD83/TNFSF11/MAP3K8/PTPN22/NFKBID/ZMIZ1/HLA-DQB1/IL7R/CD81/RIPK2/ZBTB1/PNP	16
GO:0018212	peptidyl-tyrosine modification	21/245	378/18723	2.86542e-08	4.12514e-06	3.07879e-06	KIT/LIF/IL23R/FES/PLCG2/CSF2/MAP2K6/NRP1/TTN/CBL/AREG/CD81/TYK2/PECAM1/HIPK2/HIPK1/RIPK2/PRNP/ICAM1/PPP2CA/CD44	21
GO:0002263	cell activation involved in immune response	18/245	279/18723	3.06072e-08	4.24893e-06	3.17118e-06	KIT/IL23R/RORC/IRF4/DLL1/NR4A3/NOTCH2/PIK3CD/FES/PLCG2/NFKBID/CBL/CD81/PTGER4/DOCK10/RIPK2/IL18R1/ICAM1	18
GO:0030183	B cell differentiation	13/245	141/18723	4.30622e-08	5.77182e-06	4.30779e-06	KIT/IL4I1/TNFSF13B/HDAC9/DLL1/NOTCH2/PLCG2/IRF2BP2/ATM/RBPJ/PRKDC/DOCK10/ZFP36L1	13
GO:2001234	negative regulation of apoptotic signaling pathway	16/245	224/18723	4.48505e-08	5.81113e-06	4.33712e-06	TNFAIP3/CSF2/CTNNB1/NRP1/NR4A2/MPV17L/DDX3X/ENO1/BIRC6/ICAM1/NFE2L2/CD44/HERPUD1/IVNS1ABP/PTGS2/MCL1	16
GO:2001233	regulation of apoptotic signaling pathway	20/245	356/18723	5.16831e-08	6.48039e-06	4.83662e-06	CTSH/TNFAIP3/ITM2C/SKIL/CSF2/CTNNB1/NRP1/NR4A2/ATF3/MPV17L/DDX3X/ENO1/BIRC6/ICAM1/NFE2L2/CD44/HERPUD1/IVNS1ABP/PTGS2/MCL1	20
GO:0001819	positive regulation of cytokine production	23/245	467/18723	5.64461e-08	6.85644e-06	5.11728e-06	KIT/IL1R1/IL23R/IRF4/NR4A3/CD83/PTPN22/F2R/PIK3CD/PLCG2/FURIN/CSF2/PDE4B/CD81/MAP3K7/PTGER4/DDX3X/RIPK2/IL18R1/GBP5/PNP/STAT1/PTGS2	23
GO:0002573	myeloid leukocyte differentiation	15/245	208/18723	1.05346e-07	1.21657e-05	9.07981e-06	KIT/LIF/IL23R/IRF4/FOS/TNFSF11/CA2/NOTCH2/PIK3CD/FES/CSF2/CTNNB1/CD81/RBPJ/ZFP36L1	15
GO:0045639	positive regulation of myeloid cell differentiation	11/245	103/18723	1.06414e-07	1.21657e-05	9.07981e-06	LIF/IL23R/FOS/TNFSF11/CA2/NOTCH2/FES/BRD1/PRKDC/STAT1/ZFP36L1	11
GO:0002456	T cell mediated immunity	11/245	109/18723	1.91085e-07	2.12214e-05	1.58385e-05	IL1R1/IL23R/CTSH/IL4I1/IL7R/AHR/CD81/MAP3K7/IL18R1/ZBTB1/ICAM1	11
GO:0070661	leukocyte proliferation	18/245	318/18723	2.20047e-07	2.3759e-05	1.77325e-05	KIT/IL23R/IL4I1/CASP3/TNFSF13B/LST1/TNFSF11/PTPN22/TNFAIP3/CTNNB1/PRKAR1A/IL7R/AHR/CD81/ATM/RIPK2/PRNP/PNP	18
GO:0032743	positive regulation of interleukin-2 production	7/245	34/18723	2.40016e-07	2.48821e-05	1.85707e-05	IRF4/CD83/PLCG2/PDE4B/MAP3K7/RIPK2/PNP	7
GO:0002764	immune response-regulating signaling pathway	22/245	468/18723	2.48262e-07	2.48821e-05	1.85707e-05	KIT/CTSH/IRF4/NR4A3/PTPN22/PIK3CD/PLCG2/TNFAIP3/NFKBID/MAP2K6/LPXN/TRBC1/HLA-DQB1/PDE4B/RPS6KA3/CD81/MAP3K7/DDX3X/RIPK2/NFKBIA/PRNP/PUM2	22
GO:0002460	adaptive immune response based on somatic recombination of immune receptors built from immunoglobulin superfamily domains	19/245	356/18723	2.49653e-07	2.48821e-05	1.85707e-05	IL1R1/IL23R/CTSH/IL4I1/RORC/IRF4/TNFSF13B/TNFAIP3/NFKBID/TRBC1/HLA-DQB1/IL7R/AHR/CD81/MAP3K7/RIPK2/IL18R1/ZBTB1/ICAM1	19
GO:0097193	intrinsic apoptotic signaling pathway	17/245	288/18723	2.67221e-07	2.59672e-05	1.93805e-05	CASP3/JMY/SKIL/BCL2A1/ITPR1/ATM/HIPK2/DDX3X/PRKDC/HIPK1/ENO1/NFE2L2/CD44/HERPUD1/IVNS1ABP/PTGS2/MCL1	17
GO:0002822	regulation of adaptive immune response based on somatic recombination of immune receptors built from immunoglobulin superfamily domains	13/245	168/18723	3.3779e-07	3.20241e-05	2.39011e-05	IL1R1/IL23R/IL4I1/TNFSF13B/TNFAIP3/NFKBID/IL7R/AHR/CD81/MAP3K7/RIPK2/IL18R1/ZBTB1	13
GO:0030522	intracellular receptor signaling pathway	16/245	265/18723	4.47565e-07	4.14211e-05	3.09145e-05	RORC/NR4A3/NR4A1/PTPN22/TNFAIP3/MAP2K6/NR4A2/ZMIZ1/AHR/MAP3K7/PLPP1/KDM4C/RIPK2/NFKBIA/DDX17/PUM2	16
GO:0002696	positive regulation of leukocyte activation	20/245	409/18723	4.81835e-07	4.35557e-05	3.25077e-05	IL23R/IL4I1/TNFSF13B/ICOS/NR4A3/CD83/TNFSF11/MAP3K8/PTPN22/NFKBID/ZMIZ1/TRBC1/HLA-DQB1/IL7R/CD81/PRKDC/RIPK2/ZBTB1/PNP/JUND	20
GO:0045619	regulation of lymphocyte differentiation	13/245	174/18723	5.05809e-07	4.46836e-05	3.33495e-05	IL23R/IL4I1/IRF4/CD83/NFKBID/ZMIZ1/TCF7/IL7R/PRKDC/RIPK2/ZBTB1/PNP/ZFP36L1	13
GO:0048872	homeostasis of number of cells	16/245	272/18723	6.33931e-07	5.47575e-05	4.08681e-05	KIT/CASP3/TNFSF13B/F2R/PIK3CD/TNFAIP3/SKIL/BRD1/PDE4B/IL7R/HIPK2/ZFP36/PRKDC/DOCK10/STAT1/ZFP36L1	16
GO:0070423	nucleotide-binding oligomerization domain containing signaling pathway	6/245	25/18723	6.78988e-07	5.73745e-05	4.28213e-05	PTPN22/TNFAIP3/MAP2K6/MAP3K7/RIPK2/NFKBIA	6
GO:0050867	positive regulation of cell activation	20/245	420/18723	7.30192e-07	6.03884e-05	4.50708e-05	IL23R/IL4I1/TNFSF13B/ICOS/NR4A3/CD83/TNFSF11/MAP3K8/PTPN22/NFKBID/ZMIZ1/TRBC1/HLA-DQB1/IL7R/CD81/PRKDC/RIPK2/ZBTB1/PNP/JUND	20
GO:0002763	positive regulation of myeloid leukocyte differentiation	8/245	58/18723	8.35956e-07	6.7695e-05	5.0524e-05	LIF/IL23R/FOS/TNFSF11/CA2/NOTCH2/FES/ZFP36L1	8
GO:0070663	regulation of leukocyte proliferation	15/245	245/18723	8.66171e-07	6.78715e-05	5.06557e-05	IL23R/IL4I1/CASP3/TNFSF13B/LST1/PTPN22/TNFAIP3/CTNNB1/PRKAR1A/AHR/CD81/ATM/RIPK2/PRNP/PNP	15
GO:0035872	nucleotide-binding domain, leucine rich repeat containing receptor signaling pathway	6/245	26/18723	8.73058e-07	6.78715e-05	5.06557e-05	PTPN22/TNFAIP3/MAP2K6/MAP3K7/RIPK2/NFKBIA	6
GO:0002819	regulation of adaptive immune response	13/245	183/18723	8.9873e-07	6.84973e-05	5.11228e-05	IL1R1/IL23R/IL4I1/TNFSF13B/TNFAIP3/NFKBID/IL7R/AHR/CD81/MAP3K7/RIPK2/IL18R1/ZBTB1	13
GO:0009612	response to mechanical stimulus	14/245	216/18723	1.02758e-06	7.68114e-05	5.7328e-05	KIT/GSN/CXCR4/FOS/FOSB/BTG2/CTNNB1/TTN/PTGER4/NFKBIA/ATP1A1/STAT1/PTGS2/JUND	14
GO:0045621	positive regulation of lymphocyte differentiation	10/245	104/18723	1.08944e-06	7.98995e-05	5.96328e-05	IL23R/IL4I1/CD83/NFKBID/ZMIZ1/IL7R/PRKDC/RIPK2/ZBTB1/PNP	10
GO:0034612	response to tumor necrosis factor	15/245	253/18723	1.2966e-06	9.3331e-05	6.96574e-05	AFF3/CASP3/TNFSF13B/TNFSF11/TNFRSF25/TNFAIP3/ADAM10/ZFP36/HIPK1/NFKBIA/ICAM1/NFE2L2/STAT1/ZFP36L1/PTGS2	15
GO:0051251	positive regulation of lymphocyte activation	18/245	362/18723	1.44589e-06	0.000102185	7.62657e-05	IL23R/IL4I1/TNFSF13B/ICOS/CD83/TNFSF11/MAP3K8/PTPN22/NFKBID/ZMIZ1/TRBC1/HLA-DQB1/IL7R/CD81/PRKDC/RIPK2/ZBTB1/PNP	18
GO:0002443	leukocyte mediated immunity	20/245	440/18723	1.49937e-06	0.000104072	7.76739e-05	KIT/IL1R1/IL23R/CTSH/IL4I1/NR4A3/PIK3CD/FES/PLCG2/TRBC1/HLA-DQB1/CBL/IL7R/AHR/CD81/MAP3K7/IL18R1/ZBTB1/ICAM1/CD96	20
GO:0050731	positive regulation of peptidyl-tyrosine phosphorylation	13/245	193/18723	1.63652e-06	0.000110929	8.27915e-05	KIT/LIF/IL23R/PLCG2/CSF2/NRP1/AREG/CD81/PECAM1/RIPK2/PRNP/ICAM1/CD44	13
GO:0050670	regulation of lymphocyte proliferation	14/245	225/18723	1.66897e-06	0.000110929	8.27915e-05	IL23R/IL4I1/CASP3/TNFSF13B/LST1/PTPN22/CTNNB1/PRKAR1A/AHR/CD81/ATM/RIPK2/PRNP/PNP	14
GO:0002709	regulation of T cell mediated immunity	9/245	85/18723	1.68377e-06	0.000110929	8.27915e-05	IL1R1/IL23R/IL4I1/IL7R/AHR/CD81/MAP3K7/IL18R1/ZBTB1	9
GO:0002285	lymphocyte activation involved in immune response	13/245	194/18723	1.73393e-06	0.000112068	8.36419e-05	IL23R/RORC/IRF4/DLL1/NOTCH2/PLCG2/NFKBID/CD81/PTGER4/DOCK10/RIPK2/IL18R1/ICAM1	13
GO:0002703	regulation of leukocyte mediated immunity	14/245	226/18723	1.75873e-06	0.000112068	8.36419e-05	KIT/IL1R1/IL23R/IL4I1/FES/PLCG2/IL7R/AHR/CD81/MAP3K7/IL18R1/ZBTB1/ICAM1/CD96	14
GO:0032944	regulation of mononuclear cell proliferation	14/245	227/18723	1.85278e-06	0.000116157	8.66935e-05	IL23R/IL4I1/CASP3/TNFSF13B/LST1/PTPN22/CTNNB1/PRKAR1A/AHR/CD81/ATM/RIPK2/PRNP/PNP	14
GO:0010720	positive regulation of cell development	16/245	298/18723	2.10303e-06	0.000129754	9.68413e-05	KIT/LIF/PLXNC1/TGM2/CXCR4/TNFSF11/SKIL/CTNNB1/NRP1/DOCK5/MACF1/NAP1L1/TIAM1/PRKDC/EIF4G2/ARHGEF7	16
GO:0050730	regulation of peptidyl-tyrosine phosphorylation	15/245	264/18723	2.20059e-06	0.000133651	9.97503e-05	KIT/LIF/IL23R/PLCG2/CSF2/NRP1/CBL/AREG/CD81/PECAM1/RIPK2/PRNP/ICAM1/PPP2CA/CD44	15
GO:0045582	positive regulation of T cell differentiation	9/245	91/18723	2.99427e-06	0.000179057	0.000133639	IL23R/IL4I1/CD83/NFKBID/ZMIZ1/IL7R/RIPK2/ZBTB1/PNP	9
GO:0045580	regulation of T cell differentiation	11/245	146/18723	3.56362e-06	0.000209875	0.00015664	IL23R/IL4I1/IRF4/CD83/NFKBID/ZMIZ1/TCF7/IL7R/RIPK2/ZBTB1/PNP	11
GO:0050852	T cell receptor signaling pathway	10/245	123/18723	5.04087e-06	0.000292446	0.000218266	PTPN22/PIK3CD/PLCG2/NFKBID/HLA-DQB1/PDE4B/CD81/MAP3K7/RIPK2/PRNP	10
GO:1901653	cellular response to peptide	17/245	359/18723	5.47168e-06	0.000312771	0.000233436	HDAC9/NR4A3/ENPP1/CA2/NR4A1/PTPN22/KLF11/MYO5A/NR4A2/KLF4/PRKDC/RIPK2/PRNP/ICAM1/NFE2L2/STAT1/ZFP36L1	17
GO:0034405	response to fluid shear stress	6/245	35/18723	5.5773e-06	0.000314188	0.000234493	ABCA1/CA2/CSF2/KLF4/NFE2L2/PTGS2	6
GO:0046651	lymphocyte proliferation	15/245	288/18723	6.36239e-06	0.000353294	0.00026368	IL23R/IL4I1/CASP3/TNFSF13B/LST1/PTPN22/CTNNB1/PRKAR1A/IL7R/AHR/CD81/ATM/RIPK2/PRNP/PNP	15
GO:0046631	alpha-beta T cell activation	11/245	156/18723	6.75473e-06	0.000369797	0.000275997	IL23R/RORC/IRF4/CD83/PTPN22/NFKBID/CD81/PTGER4/RIPK2/IL18R1/PNP	11
GO:0007517	muscle organ development	16/245	327/18723	6.89007e-06	0.000371968	0.000277618	LIF/HDAC9/SVIL/DLL1/FOS/NR4A1/MAFF/BTG2/CTNNB1/ATF3/TTN/CHD7/RBPJ/CD164/DDX17/UTRN	16
GO:0032943	mononuclear cell proliferation	15/245	291/18723	7.2067e-06	0.000383732	0.000286398	IL23R/IL4I1/CASP3/TNFSF13B/LST1/PTPN22/CTNNB1/PRKAR1A/IL7R/AHR/CD81/ATM/RIPK2/PRNP/PNP	15
GO:0001701	in utero embryonic development	17/245	367/18723	7.31545e-06	0.000384259	0.000286791	LIF/NOTCH2/MAFF/SKIL/FURIN/CSF2/CTNNB1/ADAM10/ZMIZ1/KLF4/ZFAND5/CHD7/RBPJ/BIRC6/HECTD1/CTR9/ZFP36L1	17
GO:0035710	CD4-positive, alpha-beta T cell activation	9/245	102/18723	7.72427e-06	0.00039526	0.000295001	IL23R/RORC/IRF4/CD83/NFKBID/CD81/PTGER4/RIPK2/IL18R1	9
GO:0070371	ERK1 and ERK2 cascade	16/245	330/18723	7.72826e-06	0.00039526	0.000295001	LIF/CTSH/SPRY1/TNFSF11/PTPN22/NOTCH2/F2R/NRP1/ATF3/KLF4/TIAM1/PTGER4/RIPK2/ICAM1/CD44/ZFP36L1	16
GO:0043434	response to peptide hormone	18/245	414/18723	9.35598e-06	0.000472295	0.000352496	CAT/HDAC9/NR4A3/ENPP1/CA2/NR4A1/BTG2/MYO5A/NR4A2/AREG/VPS13C/PRKDC/ICAM1/NFE2L2/STAT1/ZFP36L1/PTGS2/JUND	18
GO:0062197	cellular response to chemical stress	16/245	337/18723	1.00484e-05	0.000500746	0.00037373	CASP3/NCOA7/NR4A3/FOS/TP53INP1/TNFAIP3/CTNNB1/NR4A2/KLF4/ATM/DDX3X/NFE2L2/SETX/ZFP36L1/PTGS2/MCL1	16
GO:0035994	response to muscle stretch	5/245	23/18723	1.0222e-05	0.000502949	0.000375375	GSN/FOS/CTNNB1/TTN/NFKBIA	5
GO:0002824	positive regulation of adaptive immune response based on somatic recombination of immune receptors built from immunoglobulin superfamily domains	9/245	107/18723	1.14258e-05	0.00055515	0.000414335	IL1R1/IL23R/TNFSF13B/NFKBID/CD81/MAP3K7/RIPK2/IL18R1/ZBTB1	9
GO:0002753	cytoplasmic pattern recognition receptor signaling pathway	7/245	60/18723	1.29022e-05	0.000608136	0.000453881	PTPN22/TNFAIP3/MAP2K6/MAP3K7/RIPK2/NFKBIA/PUM2	7
GO:0048608	reproductive structure development	18/245	424/18723	1.29172e-05	0.000608136	0.000453881	KIT/LIF/CASP3/TIPARP/NRIP1/NOTCH2/CSF2/CTNNB1/CBL/CHD7/RBPJ/HSD17B4/BIRC6/ICAM1/HECTD1/CSDE1/ZFP36L1/PTGS2	18
GO:0043367	CD4-positive, alpha-beta T cell differentiation	8/245	83/18723	1.29857e-05	0.000608136	0.000453881	IL23R/RORC/IRF4/CD83/NFKBID/PTGER4/RIPK2/IL18R1	8
GO:0002699	positive regulation of immune effector process	13/245	235/18723	1.40556e-05	0.000649372	0.000484657	KIT/IL1R1/IL23R/NR4A3/PTPN22/FES/PLCG2/NFKBID/CD81/MAP3K7/RIPK2/IL18R1/ZBTB1	13
GO:0061458	reproductive system development	18/245	427/18723	1.42003e-05	0.000649372	0.000484657	KIT/LIF/CASP3/TIPARP/NRIP1/NOTCH2/CSF2/CTNNB1/CBL/CHD7/RBPJ/HSD17B4/BIRC6/ICAM1/HECTD1/CSDE1/ZFP36L1/PTGS2	18
GO:0022604	regulation of cell morphogenesis	15/245	309/18723	1.47127e-05	0.000664979	0.000496305	KIT/PLXNC1/LST1/CXCR4/ATP10A/FES/NRP1/DOCK5/MACF1/TIAM1/MYO9A/PRKDC/ICAM1/ARHGEF7/CD44	15
GO:0019221	cytokine-mediated signaling pathway	19/245	472/18723	1.5589e-05	0.000696486	0.000519821	KIT/IL1R1/IL23R/TNFSF13B/CXCR4/TNFSF11/TNFRSF25/TNFAIP3/CBL/IL7R/TYK2/MAP3K7/HIPK1/RIPK2/IL18R1/NFKBIA/CTR9/CD44/STAT1	19
GO:0042129	regulation of T cell proliferation	11/245	171/18723	1.61296e-05	0.000712452	0.000531737	IL23R/IL4I1/CASP3/TNFSF13B/PTPN22/CTNNB1/PRKAR1A/CD81/RIPK2/PRNP/PNP	11
GO:0002821	positive regulation of adaptive immune response	9/245	112/18723	1.65458e-05	0.000714594	0.000533335	IL1R1/IL23R/TNFSF13B/NFKBID/CD81/MAP3K7/RIPK2/IL18R1/ZBTB1	9
GO:0046632	alpha-beta T cell differentiation	9/245	112/18723	1.65458e-05	0.000714594	0.000533335	IL23R/RORC/IRF4/CD83/NFKBID/PTGER4/RIPK2/IL18R1/PNP	9
GO:0002221	pattern recognition receptor signaling pathway	11/245	172/18723	1.70355e-05	0.000727659	0.000543086	IRF4/PTPN22/PLCG2/TNFAIP3/MAP2K6/RPS6KA3/MAP3K7/DDX3X/RIPK2/NFKBIA/PUM2	11
GO:0002286	T cell activation involved in immune response	9/245	114/18723	1.90816e-05	0.000806199	0.000601705	IL23R/RORC/IRF4/NFKBID/CD81/PTGER4/RIPK2/IL18R1/ICAM1	9
GO:0045672	positive regulation of osteoclast differentiation	5/245	26/18723	1.93524e-05	0.000808846	0.00060368	IL23R/FOS/TNFSF11/CA2/NOTCH2	5
GO:0051090	regulation of DNA-binding transcription factor activity	18/245	440/18723	2.11816e-05	0.000875884	0.000653714	KIT/JMY/CAT/ENPP1/TNFSF11/PLCG2/TNFAIP3/CTNNB1/BHLHE40/KLF4/MAP3K7/HIPK2/RIPK2/IL18R1/NFKBIA/PRNP/ICAM1/SGK1	18
GO:0002720	positive regulation of cytokine production involved in immune response	7/245	65/18723	2.20021e-05	0.000900234	0.000671888	KIT/IL1R1/NR4A3/PLCG2/CD81/MAP3K7/IL18R1	7
GO:0042542	response to hydrogen peroxide	10/245	146/18723	2.28782e-05	0.000926327	0.000691362	CASP3/CAT/NR4A3/TNFAIP3/KLF4/AREG/PPP1R15B/NFE2L2/SETX/STAT1	10
GO:0042093	T-helper cell differentiation	7/245	66/18723	2.4341e-05	0.000970502	0.000724332	IL23R/RORC/IRF4/NFKBID/PTGER4/RIPK2/IL18R1	7
GO:0060537	muscle tissue development	17/245	403/18723	2.44685e-05	0.000970502	0.000724332	TIPARP/HDAC9/SVIL/DLL1/FOS/NR4A1/NOTCH2/MAFF/BTG2/CTNNB1/ATF3/TTN/PRKAR1A/ZFAND5/CHD7/RBPJ/DDX17	17
GO:0006979	response to oxidative stress	18/245	446/18723	2.53333e-05	0.000994653	0.000742357	CASP3/NCOA7/CAT/NR4A3/FOS/TP53INP1/TNFAIP3/CTNNB1/NR4A2/KLF4/AREG/PPP1R15B/PRNP/NFE2L2/SETX/STAT1/PTGS2/MCL1	18
GO:0046635	positive regulation of alpha-beta T cell activation	7/245	67/18723	2.68808e-05	0.00104486	0.000779827	IL23R/CD83/PTPN22/NFKBID/CD81/RIPK2/PNP	7
GO:0002761	regulation of myeloid leukocyte differentiation	9/245	120/18723	2.87625e-05	0.00110693	0.000826153	LIF/IL23R/FOS/TNFSF11/CA2/NOTCH2/FES/CTNNB1/ZFP36L1	9
GO:0002294	CD4-positive, alpha-beta T cell differentiation involved in immune response	7/245	68/18723	2.9635e-05	0.00112932	0.000842869	IL23R/RORC/IRF4/NFKBID/PTGER4/RIPK2/IL18R1	7
GO:2001236	regulation of extrinsic apoptotic signaling pathway	10/245	151/18723	3.05893e-05	0.00114832	0.000857044	TNFAIP3/ITM2C/SKIL/CSF2/NRP1/ATF3/DDX3X/BIRC6/ICAM1/MCL1	10
GO:0002224	toll-like receptor signaling pathway	9/245	121/18723	3.07242e-05	0.00114832	0.000857044	IRF4/PTPN22/PLCG2/TNFAIP3/RPS6KA3/MAP3K7/DDX3X/RIPK2/NFKBIA	9
GO:0002287	alpha-beta T cell activation involved in immune response	7/245	69/18723	3.26171e-05	0.00119606	0.000892678	IL23R/RORC/IRF4/NFKBID/PTGER4/RIPK2/IL18R1	7
GO:0002293	alpha-beta T cell differentiation involved in immune response	7/245	69/18723	3.26171e-05	0.00119606	0.000892678	IL23R/RORC/IRF4/NFKBID/PTGER4/RIPK2/IL18R1	7
GO:0097191	extrinsic apoptotic signaling pathway	12/245	219/18723	3.30826e-05	0.0012018	0.000896958	TNFAIP3/ITM2C/SKIL/BCL2A1/CSF2/NRP1/ATF3/DDX3X/HIPK1/BIRC6/ICAM1/MCL1	12
GO:0001822	kidney development	14/245	293/18723	3.38142e-05	0.001217	0.000908303	LIF/CTSH/SPRY1/TIPARP/CAT/COL4A3/DLL1/COL4A4/CA2/NOTCH2/CTNNB1/NRP1/PECAM1/STAT1	14
GO:0010038	response to metal ion	16/245	373/18723	3.48044e-05	0.00124114	0.000926325	KIT/CPNE7/CASP3/CAT/FOS/CA2/FOSB/PLCG2/SLC41A1/TTN/PRNP/ICAM1/PPP2CA/NFE2L2/PTGS2/JUND	16
GO:0045165	cell fate commitment	13/245	258/18723	3.74332e-05	0.00132121	0.000986084	IL23R/CASP3/IRF4/DLL1/NOTCH2/CTNNB1/NRP1/KLF4/RBPJ/PRKDC/RUNX2/CTR9/MCL1	13
GO:0002718	regulation of cytokine production involved in immune response	8/245	96/18723	3.77295e-05	0.00132121	0.000986084	KIT/IL1R1/NR4A3/PLCG2/CD81/MAP3K7/IL18R1/CD96	8
GO:0007519	skeletal muscle tissue development	10/245	155/18723	3.82675e-05	0.00132809	0.000991214	HDAC9/SVIL/DLL1/FOS/NR4A1/MAFF/BTG2/CTNNB1/ATF3/DDX17	10
GO:0002274	myeloid leukocyte activation	12/245	223/18723	3.94837e-05	0.00135817	0.00101367	KIT/IRF4/NR4A3/NOTCH2/PIK3CD/FES/PLCG2/CSF2/ADAM10/CBL/RBPJ/JUND	12
GO:0002262	myeloid cell homeostasis	10/245	157/18723	4.26875e-05	0.00144225	0.00107642	KIT/CASP3/PIK3CD/BRD1/PDE4B/HIPK2/ZFP36/PRKDC/STAT1/ZFP36L1	10
GO:0048545	response to steroid hormone	15/245	339/18723	4.30607e-05	0.00144225	0.00107642	CASP3/NR4A3/FOS/CA2/FOSB/ZMIZ1/AREG/ZFP36/PLPP1/KDM4C/DDX17/ICAM1/ATP1A1/ZFP36L1/PTGS2	15
GO:0050769	positive regulation of neurogenesis	12/245	225/18723	4.30687e-05	0.00144225	0.00107642	KIT/LIF/PLXNC1/TGM2/CXCR4/SKIL/CTNNB1/NRP1/MACF1/NAP1L1/TIAM1/EIF4G2	12
GO:0002367	cytokine production involved in immune response	8/245	98/18723	4.37833e-05	0.00144225	0.00107642	KIT/IL1R1/NR4A3/PLCG2/CD81/MAP3K7/IL18R1/CD96	8
GO:2001243	negative regulation of intrinsic apoptotic signaling pathway	8/245	98/18723	4.37833e-05	0.00144225	0.00107642	DDX3X/ENO1/NFE2L2/CD44/HERPUD1/IVNS1ABP/PTGS2/MCL1	8
GO:0002827	positive regulation of T-helper 1 type immune response	4/245	16/18723	4.60095e-05	0.00149033	0.0011123	IL1R1/IL23R/RIPK2/IL18R1	4
GO:0070431	nucleotide-binding oligomerization domain containing 2 signaling pathway	4/245	16/18723	4.60095e-05	0.00149033	0.0011123	PTPN22/TNFAIP3/RIPK2/NFKBIA	4
GO:0072001	renal system development	14/245	302/18723	4.69984e-05	0.00150068	0.00112003	LIF/CTSH/SPRY1/TIPARP/CAT/COL4A3/DLL1/COL4A4/CA2/NOTCH2/CTNNB1/NRP1/PECAM1/STAT1	14
GO:0008630	intrinsic apoptotic signaling pathway in response to DNA damage	8/245	99/18723	4.71014e-05	0.00150068	0.00112003	SKIL/BCL2A1/ATM/HIPK2/PRKDC/HIPK1/CD44/MCL1	8
GO:0002292	T cell differentiation involved in immune response	7/245	75/18723	5.61441e-05	0.00177425	0.0013242	IL23R/RORC/IRF4/NFKBID/PTGER4/RIPK2/IL18R1	7
GO:0002700	regulation of production of molecular mediator of immune response	10/245	164/18723	6.17581e-05	0.00193592	0.00144487	KIT/IL1R1/NR4A3/PTPN22/PLCG2/CD81/MAP3K7/PRKDC/IL18R1/CD96	10
GO:0001975	response to amphetamine	5/245	33/18723	6.47978e-05	0.00200617	0.0014973	HDAC9/NR4A1/NR4A2/RANBP2/ICAM1	5
GO:0042098	T cell proliferation	11/245	199/18723	6.50725e-05	0.00200617	0.0014973	IL23R/IL4I1/CASP3/TNFSF13B/PTPN22/CTNNB1/PRKAR1A/CD81/RIPK2/PRNP/PNP	11
GO:2000116	regulation of cysteine-type endopeptidase activity	12/245	235/18723	6.55476e-05	0.00200617	0.0014973	CTSH/GSN/COL4A3/NR4A1/F2R/KLF4/RPS6KA3/DDX3X/RIPK2/CD44/HERPUD1/PTGS2	12
GO:0046634	regulation of alpha-beta T cell activation	8/245	104/18723	6.70039e-05	0.00203472	0.00151861	IL23R/IRF4/CD83/PTPN22/NFKBID/CD81/RIPK2/PNP	8
GO:0060538	skeletal muscle organ development	10/245	166/18723	6.83838e-05	0.00206053	0.00153787	HDAC9/SVIL/DLL1/FOS/NR4A1/MAFF/BTG2/CTNNB1/ATF3/DDX17	10
GO:0043154	negative regulation of cysteine-type endopeptidase activity involved in apoptotic process	7/245	78/18723	7.2288e-05	0.00216141	0.00161316	NR4A1/KLF4/RPS6KA3/DDX3X/CD44/HERPUD1/PTGS2	7
GO:0002768	immune response-regulating cell surface receptor signaling pathway	14/245	315/18723	7.39196e-05	0.00219332	0.00163698	KIT/NR4A3/PTPN22/PIK3CD/PLCG2/NFKBID/LPXN/TRBC1/HLA-DQB1/PDE4B/CD81/MAP3K7/RIPK2/PRNP	14
GO:0002706	regulation of lymphocyte mediated immunity	10/245	168/18723	7.56044e-05	0.00222632	0.00166161	IL1R1/IL23R/IL4I1/IL7R/AHR/CD81/MAP3K7/IL18R1/ZBTB1/CD96	10
GO:0050851	antigen receptor-mediated signaling pathway	12/245	240/18723	8.01667e-05	0.00234292	0.00174863	PTPN22/PIK3CD/PLCG2/NFKBID/LPXN/TRBC1/HLA-DQB1/PDE4B/CD81/MAP3K7/RIPK2/PRNP	12
GO:1901214	regulation of neuron death	14/245	319/18723	8.45403e-05	0.0024523	0.00183027	CASP3/NCOA7/NR4A3/FOS/SSH1/F2R/BTG2/CTNNB1/NRP1/NR4A2/CBL/HIPK2/PRNP/MCL1	14
GO:0002711	positive regulation of T cell mediated immunity	6/245	56/18723	8.86989e-05	0.00255387	0.00190608	IL1R1/IL23R/CD81/MAP3K7/IL18R1/ZBTB1	6
GO:0009896	positive regulation of catabolic process	18/245	492/18723	8.98618e-05	0.00256833	0.00191687	TIPARP/RNF152/TP53INP1/TNFAIP3/BTG2/FURIN/FYCO1/HUWE1/CD81/MAP3K7/ZFP36/SPTLC2/RIPK2/NFE2L2/HECTD1/ZFP36L1/HERPUD1/RNF139	18
GO:0050767	regulation of neurogenesis	15/245	364/18723	9.58546e-05	0.00271961	0.00202978	KIT/LIF/PLXNC1/TGM2/DLL1/CXCR4/SKIL/CTNNB1/NRP1/BHLHE40/MACF1/NAP1L1/TIAM1/CHD7/EIF4G2	15
GO:0043281	regulation of cysteine-type endopeptidase activity involved in apoptotic process	11/245	209/18723	0.000100915	0.00279384	0.00208518	CTSH/GSN/COL4A3/NR4A1/F2R/KLF4/RPS6KA3/DDX3X/CD44/HERPUD1/PTGS2	11
GO:0071222	cellular response to lipopolysaccharide	11/245	209/18723	0.000100915	0.00279384	0.00208518	ABCA1/PTPN22/PLCG2/TNFAIP3/CSF2/PDE4B/ZFP36/RIPK2/NFKBIA/ICAM1/CTR9	11
GO:0003012	muscle system process	17/245	452/18723	0.000101259	0.00279384	0.00208518	KIT/GSN/NR4A3/CXCR4/STAC/NR4A1/F2R/MAP2K6/DOCK5/TTN/PDE4B/KLF4/TIAM1/ENO1/UTRN/ATP1A1/PTGS2	17
GO:0071216	cellular response to biotic stimulus	12/245	246/18723	0.000101346	0.00279384	0.00208518	ABCA1/PTPN22/PLCG2/TNFAIP3/CSF2/PDE4B/PPP1R15B/ZFP36/RIPK2/NFKBIA/ICAM1/CTR9	12
GO:0048771	tissue remodeling	10/245	175/18723	0.000106198	0.00290699	0.00216963	LIF/TGM2/TNFSF11/CA2/NOTCH2/F2R/TNFAIP3/CTNNB1/CHD7/RBPJ	10
GO:0032609	interferon-gamma production	8/245	112/18723	0.000113094	0.00305274	0.00227841	IL1R1/IL23R/PTPN22/PDE4B/RIPK2/IL18R1/PRNP/CD96	8
GO:0032649	regulation of interferon-gamma production	8/245	112/18723	0.000113094	0.00305274	0.00227841	IL1R1/IL23R/PTPN22/PDE4B/RIPK2/IL18R1/PRNP/CD96	8
GO:0032495	response to muramyl dipeptide	4/245	20/18723	0.000117539	0.00312927	0.00233553	PTPN22/TNFAIP3/RIPK2/NFKBIA	4
GO:0043011	myeloid dendritic cell differentiation	4/245	20/18723	0.000117539	0.00312927	0.00233553	IRF4/NOTCH2/CSF2/RBPJ	4
GO:0014065	phosphatidylinositol 3-kinase signaling	9/245	144/18723	0.000119232	0.00315274	0.00235304	KIT/PRR5/CAT/F2R/PIK3CD/PTPN13/CBL/KLF4/ZFP36L1	9
GO:0044344	cellular response to fibroblast growth factor stimulus	8/245	113/18723	0.000120356	0.00316097	0.00235918	SPRY1/NR4A1/CTNNB1/ZFP36/RUNX2/SETX/CD44/ZFP36L1	8
GO:0002429	immune response-activating cell surface receptor signaling pathway	13/245	291/18723	0.000126839	0.00328682	0.00245311	NR4A3/PTPN22/PIK3CD/PLCG2/NFKBID/LPXN/TRBC1/HLA-DQB1/PDE4B/CD81/MAP3K7/RIPK2/PRNP	13
GO:0002757	immune response-activating signal transduction	13/245	291/18723	0.000126839	0.00328682	0.00245311	NR4A3/PTPN22/PIK3CD/PLCG2/NFKBID/LPXN/TRBC1/HLA-DQB1/PDE4B/CD81/MAP3K7/RIPK2/PRNP	13
GO:0010742	macrophage derived foam cell differentiation	5/245	38/18723	0.000129932	0.00332267	0.00247987	ABCA1/ABCA5/CSF2/NFKBIA/STAT1	5
GO:0090077	foam cell differentiation	5/245	38/18723	0.000129932	0.00332267	0.00247987	ABCA1/ABCA5/CSF2/NFKBIA/STAT1	5
GO:0009410	response to xenobiotic stimulus	17/245	462/18723	0.000131697	0.0033312	0.00248623	RORC/CASP3/CAT/CXCR4/FOS/ABCA1/FOSB/MAP2K6/PDE4B/AHR/PRNP/ICAM1/PNP/NFE2L2/ATP1A1/STAT1/PTGS2	17
GO:0097305	response to alcohol	12/245	253/18723	0.00013198	0.0033312	0.00248623	CAT/FOS/TP53INP1/ABCA1/FOSB/GRAMD1B/CTNNB1/CBL/KLF4/AHR/PTGER4/ICAM1	12
GO:2000117	negative regulation of cysteine-type endopeptidase activity	7/245	86/18723	0.000134565	0.00337455	0.00251859	NR4A1/KLF4/RPS6KA3/DDX3X/CD44/HERPUD1/PTGS2	7
GO:0097696	receptor signaling pathway via STAT	10/245	181/18723	0.000140205	0.00349344	0.00260732	KIT/LIF/IL23R/F2R/MGAT5/CSF2/IL7R/PPP2CA/CTR9/STAT1	10
GO:0071498	cellular response to fluid shear stress	4/245	21/18723	0.000143709	0.00355795	0.00265546	CA2/KLF4/NFE2L2/PTGS2	4
GO:0001776	leukocyte homeostasis	7/245	87/18723	0.00014473	0.00356055	0.00265741	CASP3/TNFSF13B/PIK3CD/TNFAIP3/SKIL/PDE4B/DOCK10	7
GO:2000516	positive regulation of CD4-positive, alpha-beta T cell activation	5/245	39/18723	0.000147462	0.00360493	0.00269053	IL23R/CD83/NFKBID/CD81/RIPK2	5
GO:0002702	positive regulation of production of molecular mediator of immune response	8/245	117/18723	0.000153371	0.00372595	0.00278085	KIT/IL1R1/NR4A3/PTPN22/PLCG2/CD81/MAP3K7/IL18R1	8
GO:0001655	urogenital system development	14/245	338/18723	0.000155186	0.00374663	0.00279629	LIF/CTSH/SPRY1/TIPARP/CAT/COL4A3/DLL1/COL4A4/CA2/NOTCH2/CTNNB1/NRP1/PECAM1/STAT1	14
GO:0007568	aging	14/245	339/18723	0.000160016	0.00383939	0.00286552	CAT/PPP1R9A/FOS/BCL2A1/MAP2K6/ZMIZ1/ATM/PRKDC/BAZ2B/PRNP/ICAM1/NFE2L2/PTGS2/JUND	14
GO:0071219	cellular response to molecule of bacterial origin	11/245	221/18723	0.000165038	0.0039356	0.00293733	ABCA1/PTPN22/PLCG2/TNFAIP3/CSF2/PDE4B/ZFP36/RIPK2/NFKBIA/ICAM1/CTR9	11
GO:0031331	positive regulation of cellular catabolic process	16/245	427/18723	0.000168983	0.00398083	0.00297108	RNF152/TP53INP1/TNFAIP3/BTG2/FURIN/FYCO1/CD81/MAP3K7/ZFP36/SPTLC2/RIPK2/NFE2L2/HECTD1/ZFP36L1/HERPUD1/RNF139	16
GO:0032103	positive regulation of response to external stimulus	16/245	427/18723	0.000168983	0.00398083	0.00297108	TGM2/CXCR4/TNFSF11/PLCG2/ADAM10/NRP1/CD81/TIAM1/MAP3K7/PTGER4/PRKDC/RIPK2/NFKBIA/GBP5/PUM2/PTGS2	16
GO:0000302	response to reactive oxygen species	11/245	222/18723	0.000171672	0.00401164	0.00299408	CASP3/CAT/NR4A3/FOS/TNFAIP3/KLF4/AREG/PPP1R15B/NFE2L2/SETX/STAT1	11
GO:0014706	striated muscle tissue development	15/245	384/18723	0.000172355	0.00401164	0.00299408	HDAC9/SVIL/DLL1/FOS/NR4A1/NOTCH2/MAFF/BTG2/CTNNB1/ATF3/TTN/PRKAR1A/CHD7/RBPJ/DDX17	15
GO:0043254	regulation of protein-containing complex assembly	16/245	428/18723	0.000173527	0.00401487	0.00299649	GSN/LDLRAD4/JMY/PPP1R9A/SVIL/SSH1/ABCA1/FES/PLCG2/CSF2/ATM/PTGER4/DDX3X/ICAM1/GBP5/ARHGEF7	16
GO:0070664	negative regulation of leukocyte proliferation	7/245	90/18723	0.000179017	0.00411739	0.00307301	IL4I1/CASP3/LST1/TNFAIP3/PRKAR1A/ATM/PRNP	7
GO:0030218	erythrocyte differentiation	8/245	120/18723	0.000182748	0.00413298	0.00308464	KIT/CASP3/BRD1/HIPK2/ZFP36/PRKDC/STAT1/ZFP36L1	8
GO:0071774	response to fibroblast growth factor	8/245	120/18723	0.000182748	0.00413298	0.00308464	SPRY1/NR4A1/CTNNB1/ZFP36/RUNX2/SETX/CD44/ZFP36L1	8
GO:0051056	regulation of small GTPase mediated signal transduction	13/245	302/18723	0.000182884	0.00413298	0.00308464	SPRY1/TGM2/ARHGAP10/ABCA1/NOTCH2/F2R/ARHGEF12/NRP1/CBL/CD2AP/TIAM1/MYO9A/TAGAP	13
GO:0045670	regulation of osteoclast differentiation	6/245	64/18723	0.000187733	0.00421803	0.00314812	IL23R/FOS/TNFSF11/CA2/NOTCH2/CTNNB1	6
GO:1904019	epithelial cell apoptotic process	8/245	121/18723	0.00019351	0.00432284	0.00322634	GSN/COL4A3/TNFAIP3/ZFP36/HIPK1/ICAM1/NFE2L2/ZFP36L1	8
GO:0002683	negative regulation of immune system process	16/245	434/18723	0.000203089	0.00449578	0.00335541	IL4I1/CASP3/LST1/PTPN22/TNFAIP3/FURIN/CTNNB1/LPXN/PRKAR1A/IL7R/AHR/ATM/PTGER4/PRKDC/PRNP/CD96	16
GO:0006936	muscle contraction	14/245	347/18723	0.000203565	0.00449578	0.00335541	KIT/GSN/CXCR4/STAC/NR4A1/F2R/MAP2K6/DOCK5/TTN/PDE4B/ENO1/UTRN/ATP1A1/PTGS2	14
GO:0043410	positive regulation of MAPK cascade	17/245	480/18723	0.000207074	0.00454744	0.00339397	KIT/LIF/TNFSF11/PTPN22/NOTCH2/F2R/PLCG2/CTNNB1/MAP2K6/NRP1/CD81/TIAM1/MAP3K7/HIPK2/RIPK2/ICAM1/CD44	17
GO:1901342	regulation of vasculature development	14/245	348/18723	0.000209668	0.00457854	0.00341718	CTSH/COL4A3/DLL1/CXCR4/PIK3CD/TNFAIP3/CTNNB1/ADAM10/NRP1/KLF4/HIPK2/HIPK1/NFE2L2/STAT1	14
GO:0097306	cellular response to alcohol	7/245	93/18723	0.000219591	0.00476844	0.00355891	TP53INP1/ABCA1/GRAMD1B/CTNNB1/KLF4/AHR/PTGER4	7
GO:0002449	lymphocyte mediated immunity	14/245	350/18723	0.000222349	0.0048015	0.00358358	IL1R1/IL23R/CTSH/IL4I1/TRBC1/HLA-DQB1/IL7R/AHR/CD81/MAP3K7/IL18R1/ZBTB1/ICAM1/CD96	14
GO:0071356	cellular response to tumor necrosis factor	11/245	229/18723	0.000224762	0.00482679	0.00360246	TNFSF13B/TNFSF11/TNFRSF25/TNFAIP3/ZFP36/HIPK1/NFKBIA/ICAM1/NFE2L2/STAT1/ZFP36L1	11
GO:0070372	regulation of ERK1 and ERK2 cascade	13/245	309/18723	0.000228678	0.00488391	0.0036451	LIF/SPRY1/TNFSF11/PTPN22/NOTCH2/F2R/NRP1/ATF3/KLF4/TIAM1/RIPK2/ICAM1/CD44	13
GO:0030316	osteoclast differentiation	7/245	94/18723	0.000234653	0.00498413	0.00371989	IL23R/FOS/TNFSF11/CA2/NOTCH2/CTNNB1/CD81	7
GO:0001709	cell fate determination	5/245	43/18723	0.000236269	0.00499118	0.00372516	DLL1/NOTCH2/CTNNB1/KLF4/MCL1	5
GO:0035914	skeletal muscle cell differentiation	6/245	67/18723	0.000241864	0.00505444	0.00377237	FOS/NR4A1/MAFF/BTG2/ATF3/DDX17	6
GO:2000514	regulation of CD4-positive, alpha-beta T cell activation	6/245	67/18723	0.000241864	0.00505444	0.00377237	IL23R/IRF4/CD83/NFKBID/CD81/RIPK2	6
GO:0002726	positive regulation of T cell cytokine production	4/245	24/18723	0.000247399	0.00514247	0.00383807	IL1R1/CD81/MAP3K7/IL18R1	4
GO:0051962	positive regulation of nervous system development	12/245	272/18723	0.000257938	0.005333	0.00398027	KIT/LIF/PLXNC1/TGM2/CXCR4/SKIL/CTNNB1/NRP1/MACF1/NAP1L1/TIAM1/EIF4G2	12
GO:0032922	circadian regulation of gene expression	6/245	68/18723	0.000262402	0.0053682	0.00400654	RORC/NRIP1/BHLHE40/HUWE1/AHR/MYCBP2	6
GO:0046637	regulation of alpha-beta T cell differentiation	6/245	68/18723	0.000262402	0.0053682	0.00400654	IL23R/IRF4/CD83/NFKBID/RIPK2/PNP	6
GO:2001237	negative regulation of extrinsic apoptotic signaling pathway	7/245	97/18723	0.000284899	0.00579793	0.00432727	TNFAIP3/CSF2/NRP1/DDX3X/BIRC6/ICAM1/MCL1	7
GO:0010506	regulation of autophagy	13/245	317/18723	0.00029273	0.00591254	0.00441281	CASP3/RNF152/TP53INP1/PTPN22/ITPR1/FYCO1/VPS13C/ATM/MAP3K7/SPTLC2/RIPK2/EIF4G2/MCL1	13
GO:0045933	positive regulation of muscle contraction	5/245	45/18723	0.000293574	0.00591254	0.00441281	KIT/F2R/ENO1/ATP1A1/PTGS2	5
GO:0034101	erythrocyte homeostasis	8/245	129/18723	0.000299792	0.00600666	0.00448305	KIT/CASP3/BRD1/HIPK2/ZFP36/PRKDC/STAT1/ZFP36L1	8
GO:0070997	neuron death	14/245	361/18723	0.000304571	0.00607112	0.00453116	CASP3/NCOA7/NR4A3/FOS/SSH1/F2R/BTG2/CTNNB1/NRP1/NR4A2/CBL/HIPK2/PRNP/MCL1	14
GO:2001242	regulation of intrinsic apoptotic signaling pathway	9/245	164/18723	0.000316634	0.00627936	0.00468659	SKIL/DDX3X/ENO1/NFE2L2/CD44/HERPUD1/IVNS1ABP/PTGS2/MCL1	9
GO:0033209	tumor necrosis factor-mediated signaling pathway	7/245	99/18723	0.000322951	0.00637214	0.00475583	TNFSF13B/TNFSF11/TNFRSF25/TNFAIP3/HIPK1/NFKBIA/STAT1	7
GO:0031648	protein destabilization	5/245	46/18723	0.000325895	0.00639774	0.00477494	CTSH/GSN/PRKDC/PRNP/RNF139	5
GO:0019827	stem cell population maintenance	8/245	131/18723	0.000332716	0.00646633	0.00482613	KIT/LIF/DLL1/NOTCH2/CTNNB1/KLF4/RBPJ/CTR9	8
GO:0046683	response to organophosphorus	8/245	131/18723	0.000332716	0.00646633	0.00482613	FOS/SSH1/FOSB/AHR/AREG/STAT1/ZFP36L1/PTGS2	8
GO:0002327	immature B cell differentiation	3/245	11/18723	0.000337919	0.0064704	0.00482916	KIT/IRF2BP2/ATM	3
GO:0060837	blood vessel endothelial cell differentiation	3/245	11/18723	0.000337919	0.0064704	0.00482916	DLL1/NRP1/RBPJ	3
GO:1900227	positive regulation of NLRP3 inflammasome complex assembly	3/245	11/18723	0.000337919	0.0064704	0.00482916	PLCG2/DDX3X/GBP5	3
GO:0036293	response to decreased oxygen levels	13/245	322/18723	0.000340087	0.00647999	0.00483632	CASP3/CAT/CXCR4/ITPR1/NR4A2/CBL/HIPK2/RBPJ/ENO1/ICAM1/NFE2L2/ZFP36L1/PTGS2	13
GO:0032729	positive regulation of interferon-gamma production	6/245	72/18723	0.000358637	0.00677577	0.00505708	IL1R1/IL23R/PTPN22/PDE4B/RIPK2/IL18R1	6
GO:1903320	regulation of protein modification by small protein conjugation or removal	11/245	242/18723	0.000360511	0.00677577	0.00505708	PTPN22/TNFAIP3/CTNNB1/ZMIZ1/HUWE1/DDX3X/RIPK2/MYCBP2/CTR9/HERPUD1/IVNS1ABP	11
GO:0045646	regulation of erythrocyte differentiation	5/245	47/18723	0.00036084	0.00677577	0.00505708	BRD1/ZFP36/PRKDC/STAT1/ZFP36L1	5
GO:0002705	positive regulation of leukocyte mediated immunity	8/245	134/18723	0.00038758	0.00720825	0.00537986	KIT/IL1R1/IL23R/PLCG2/CD81/MAP3K7/IL18R1/ZBTB1	8
GO:0098727	maintenance of cell number	8/245	134/18723	0.00038758	0.00720825	0.00537986	KIT/LIF/DLL1/NOTCH2/CTNNB1/KLF4/RBPJ/CTR9	8
GO:0002831	regulation of response to biotic stimulus	13/245	327/18723	0.000393827	0.00726456	0.00542189	IL23R/IL4I1/PTPN22/PLCG2/TNFAIP3/AHR/MAP3K7/PRKDC/RIPK2/GBP5/PUM2/CD96/STAT1	13
GO:0002825	regulation of T-helper 1 type immune response	4/245	27/18723	0.000396215	0.00726456	0.00542189	IL1R1/IL23R/RIPK2/IL18R1	4
GO:1903203	regulation of oxidative stress-induced neuron death	4/245	27/18723	0.000396215	0.00726456	0.00542189	NCOA7/NR4A3/CTNNB1/MCL1	4
GO:0043303	mast cell degranulation	5/245	48/18723	0.000398544	0.00727296	0.00542816	KIT/NR4A3/PIK3CD/FES/CBL	5
GO:0072073	kidney epithelium development	8/245	136/18723	0.000428086	0.00777556	0.00580327	LIF/SPRY1/CAT/DLL1/NOTCH2/CTNNB1/PECAM1/STAT1	8
GO:0002279	mast cell activation involved in immune response	5/245	49/18723	0.000439148	0.00783013	0.00584399	KIT/NR4A3/PIK3CD/FES/CBL	5
GO:0014075	response to amine	5/245	49/18723	0.000439148	0.00783013	0.00584399	HDAC9/NR4A1/NR4A2/RANBP2/ICAM1	5
GO:1902041	regulation of extrinsic apoptotic signaling pathway via death domain receptors	5/245	49/18723	0.000439148	0.00783013	0.00584399	TNFAIP3/SKIL/ATF3/DDX3X/ICAM1	5
GO:1904894	positive regulation of receptor signaling pathway via STAT	5/245	49/18723	0.000439148	0.00783013	0.00584399	KIT/IL23R/F2R/MGAT5/IL7R	5
GO:0002253	activation of immune response	14/245	375/18723	0.000445882	0.00784807	0.00585739	NR4A3/PTPN22/PIK3CD/PLCG2/NFKBID/LPXN/TRBC1/HLA-DQB1/PDE4B/CD81/MAP3K7/PRKDC/RIPK2/PRNP	14
GO:0072182	regulation of nephron tubule epithelial cell differentiation	3/245	12/18723	0.000446212	0.00784807	0.00585739	LIF/CTNNB1/STAT1	3
GO:1903909	regulation of receptor clustering	3/245	12/18723	0.000446212	0.00784807	0.00585739	GSN/SSH1/CD81	3
GO:0002313	mature B cell differentiation involved in immune response	4/245	28/18723	0.000457534	0.00801096	0.00597896	DLL1/NOTCH2/PLCG2/DOCK10	4
GO:0007623	circadian rhythm	10/245	210/18723	0.000462109	0.00805478	0.00601167	RORC/NRIP1/CSF2/BHLHE40/HUWE1/AHR/PRKDC/MYCBP2/SETX/JUND	10
GO:0042060	wound healing	15/245	422/18723	0.000469493	0.00814697	0.00608047	DST/CASP3/CXCR4/NOTCH2/F2R/ELK3/PLCG2/TNFAIP3/MACF1/ENTPD1/TLN1/JMJD1C/NFE2L2/CD44/GNAS	15
GO:0002448	mast cell mediated immunity	5/245	50/18723	0.000482792	0.0083036	0.00619737	KIT/NR4A3/PIK3CD/FES/CBL	5
GO:0046638	positive regulation of alpha-beta T cell differentiation	5/245	50/18723	0.000482792	0.0083036	0.00619737	IL23R/CD83/NFKBID/RIPK2/PNP	5
GO:0001659	temperature homeostasis	9/245	174/18723	0.000488312	0.00836153	0.00624061	IRF4/CXCR4/TNFSF11/MAP2K6/ELOVL6/RBPJ/IL18R1/GNAS/PTGS2	9
GO:0051346	negative regulation of hydrolase activity	14/245	379/18723	0.000495312	0.00844421	0.00630231	SPRY1/HDAC9/COL4A3/NR4A1/FURIN/MGAT5/KLF4/RPS6KA3/DDX3X/BIRC6/PRNP/CD44/HERPUD1/PTGS2	14
GO:0010951	negative regulation of endopeptidase activity	11/245	252/18723	0.0005069	0.00860402	0.00642159	COL4A3/NR4A1/FURIN/KLF4/RPS6KA3/DDX3X/BIRC6/PRNP/CD44/HERPUD1/PTGS2	11
GO:0001773	myeloid dendritic cell activation	4/245	29/18723	0.000525325	0.00883956	0.00659739	IRF4/NOTCH2/CSF2/RBPJ	4
GO:0072539	T-helper 17 cell differentiation	4/245	29/18723	0.000525325	0.00883956	0.00659739	IL23R/RORC/IRF4/NFKBID	4
GO:0043370	regulation of CD4-positive, alpha-beta T cell differentiation	5/245	51/18723	0.000529622	0.00887346	0.00662268	IL23R/IRF4/CD83/NFKBID/RIPK2	5
GO:0072006	nephron development	8/245	142/18723	0.00057068	0.00943954	0.00704518	LIF/COL4A3/DLL1/COL4A4/NOTCH2/CTNNB1/PECAM1/STAT1	8
GO:0003337	mesenchymal to epithelial transition involved in metanephros morphogenesis	3/245	13/18723	0.000574482	0.00943954	0.00704518	LIF/CTNNB1/STAT1	3
GO:0010745	negative regulation of macrophage derived foam cell differentiation	3/245	13/18723	0.000574482	0.00943954	0.00704518	ABCA1/ABCA5/NFKBIA	3
GO:0072672	neutrophil extravasation	3/245	13/18723	0.000574482	0.00943954	0.00704518	IL1R1/PIK3CD/PECAM1	3
GO:0048015	phosphatidylinositol-mediated signaling	9/245	178/18723	0.000575552	0.00943954	0.00704518	KIT/PRR5/CAT/F2R/PIK3CD/PTPN13/CBL/KLF4/ZFP36L1	9
GO:0048511	rhythmic process	12/245	298/18723	0.000585538	0.00956297	0.0071373	RORC/CASP3/NRIP1/CSF2/MAP2K6/BHLHE40/HUWE1/AHR/PRKDC/MYCBP2/SETX/JUND	12
GO:0050772	positive regulation of axonogenesis	6/245	79/18723	0.000591379	0.00961795	0.00717833	PLXNC1/SKIL/NRP1/MACF1/TIAM1/EIF4G2	6
GO:0052548	regulation of endopeptidase activity	15/245	432/18723	0.000597964	0.00964341	0.00719734	CTSH/GSN/COL4A3/NR4A1/F2R/FURIN/KLF4/RPS6KA3/DDX3X/RIPK2/BIRC6/PRNP/CD44/HERPUD1/PTGS2	15
GO:0001933	negative regulation of protein phosphorylation	13/245	342/18723	0.000600387	0.00964341	0.00719734	SPRY1/CASP3/LDLRAD4/ENPP1/PTPN22/TNFAIP3/PTPN13/CBL/PRKAR1A/PPP1R15B/PRKDC/PRNP/PPP2CA	13
GO:0045765	regulation of angiogenesis	13/245	342/18723	0.000600387	0.00964341	0.00719734	CTSH/COL4A3/DLL1/CXCR4/PIK3CD/TNFAIP3/CTNNB1/NRP1/KLF4/HIPK2/HIPK1/NFE2L2/STAT1	13

## Sheet: ILC3_c2
ID	Description	GeneRatio	BgRatio	pvalue	p.adjust	qvalue	geneID	Count
GO:0006457	protein folding	17/89	212/18723	1.60101e-16	3.45818e-13	2.55993e-13	DNAJB1/HSPA1B/HSP90AA1/DNAJA1/HSPH1/HSPA1A/HSPA6/DNAJB4/HSP90AB1/HSPA8/FKBP5/HSPD1/DNAJB6/AHSA1/HSPE1/TCP1/CHORDC1	17
GO:0009408	response to heat	13/89	110/18723	4.64799e-15	3.84491e-12	2.84621e-12	DNAJB1/HSPA1B/HSP90AA1/DNAJA1/HSPA1A/CDKN1A/HSPA6/DNAJB4/HSP90AB1/IER5/HSPD1/DNAJB6/CHORDC1	13
GO:0009266	response to temperature stimulus	15/89	178/18723	5.34015e-15	3.84491e-12	2.84621e-12	DNAJB1/HSPA1B/HSP90AA1/DNAJA1/HSPA1A/CDKN1A/HSPA6/DNAJB4/HSP90AB1/NFKBIA/IER5/HSPD1/DNAJB6/CXCR4/CHORDC1	15
GO:0061077	chaperone-mediated protein folding	11/89	67/18723	1.52964e-14	8.26003e-12	6.11452e-12	DNAJB1/HSPA1B/HSPH1/HSPA1A/HSPA6/DNAJB4/HSPA8/FKBP5/DNAJB6/HSPE1/CHORDC1	11
GO:0034605	cellular response to heat	11/89	69/18723	2.15434e-14	9.30674e-12	6.88934e-12	DNAJB1/HSPA1B/HSP90AA1/HSPA1A/CDKN1A/HSPA6/HSP90AB1/IER5/HSPD1/DNAJB6/CHORDC1	11
GO:0006986	response to unfolded protein	13/89	137/18723	8.45773e-14	3.04478e-11	2.25391e-11	DNAJB1/HSPA1B/HSP90AA1/DNAJA1/HSPH1/HSPA1A/HSPA6/PPP1R15A/DNAJB4/HSP90AB1/HSPA8/HSPD1/HSPE1	13
GO:0006458	'de novo' protein folding	9/89	43/18723	4.04308e-13	1.24758e-10	9.23524e-11	DNAJB1/HSPA1B/HSPH1/HSPA1A/HSPA6/DNAJB4/HSPA8/HSPD1/HSPE1	9
GO:0035966	response to topologically incorrect protein	13/89	159/18723	5.86245e-13	1.58286e-10	1.17172e-10	DNAJB1/HSPA1B/HSP90AA1/DNAJA1/HSPH1/HSPA1A/HSPA6/PPP1R15A/DNAJB4/HSP90AB1/HSPA8/HSPD1/HSPE1	13
GO:0051085	chaperone cofactor-dependent protein refolding	8/89	34/18723	3.1019e-12	7.44455e-10	5.51085e-10	DNAJB1/HSPA1B/HSPH1/HSPA1A/HSPA6/DNAJB4/HSPA8/HSPE1	8
GO:0051084	'de novo' posttranslational protein folding	8/89	39/18723	1.03104e-11	2.22704e-09	1.64858e-09	DNAJB1/HSPA1B/HSPH1/HSPA1A/HSPA6/DNAJB4/HSPA8/HSPE1	8
GO:0042026	protein refolding	6/89	23/18723	9.19748e-10	1.80605e-07	1.33693e-07	HSPA1B/HSP90AA1/HSPA1A/HSPA6/HSPA8/HSPD1	6
GO:0042110	T cell activation	15/89	487/18723	8.89151e-09	1.60047e-06	1.18475e-06	HSPH1/NFKBID/ZC3H12A/NFKBIZ/CD83/ICAM1/HSPD1/RUNX2/CD55/PRDM1/DUSP10/SLAMF1/ZBTB16/RHOH/PTGER4	15
GO:1903039	positive regulation of leukocyte cell-cell adhesion	11/89	239/18723	1.7726e-08	2.94525e-06	2.18023e-06	HSPH1/NFKBID/NFKBIZ/CD83/ICAM1/HSPD1/CD55/DUSP10/SLAMF1/ZBTB16/RHOH	11
GO:0019058	viral life cycle	12/89	317/18723	3.33847e-08	4.83835e-06	3.58161e-06	HSPA1B/HSPA1A/HSP90AB1/HSPA8/ZC3H12A/ICAM1/CXCR4/CD55/SLAMF1/DDX3X/DDX5/ZC3HAV1	12
GO:0046634	regulation of alpha-beta T cell activation	8/89	104/18723	3.35997e-08	4.83835e-06	3.58161e-06	HSPH1/NFKBID/ZC3H12A/NFKBIZ/CD83/CD55/PRDM1/ZBTB16	8
GO:0050863	regulation of T cell activation	12/89	329/18723	5.01854e-08	6.77503e-06	5.01524e-06	HSPH1/NFKBID/ZC3H12A/NFKBIZ/CD83/HSPD1/CD55/PRDM1/DUSP10/SLAMF1/ZBTB16/RHOH	12
GO:0046631	alpha-beta T cell activation	9/89	156/18723	5.52643e-08	7.02181e-06	5.19792e-06	HSPH1/NFKBID/ZC3H12A/NFKBIZ/CD83/CD55/PRDM1/ZBTB16/PTGER4	9
GO:1903037	regulation of leukocyte cell-cell adhesion	12/89	336/18723	6.31676e-08	7.58011e-06	5.6112e-06	HSPH1/NFKBID/ZC3H12A/NFKBIZ/CD83/ICAM1/HSPD1/CD55/DUSP10/SLAMF1/ZBTB16/RHOH	12
GO:0050870	positive regulation of T cell activation	10/89	216/18723	7.79342e-08	8.85988e-06	6.55856e-06	HSPH1/NFKBID/NFKBIZ/CD83/HSPD1/CD55/DUSP10/SLAMF1/ZBTB16/RHOH	10
GO:0022409	positive regulation of cell-cell adhesion	11/89	284/18723	1.03232e-07	1.1149e-05	8.25309e-06	HSPH1/NFKBID/NFKBIZ/CD83/ICAM1/HSPD1/CD55/DUSP10/SLAMF1/ZBTB16/RHOH	11
GO:0044403	biological process involved in symbiotic interaction	11/89	290/18723	1.2748e-07	1.31122e-05	9.70635e-06	HSPA1B/HSPA1A/HSP90AB1/HSPA8/ZC3H12A/ICAM1/HSPD1/CXCR4/CD55/TCP1/SLAMF1	11
GO:0090084	negative regulation of inclusion body assembly	4/89	11/18723	1.53455e-07	1.50665e-05	1.1153e-05	DNAJB1/HSPA1B/HSPA1A/DNAJB6	4
GO:0007159	leukocyte cell-cell adhesion	12/89	371/18723	1.84842e-07	1.71801e-05	1.27176e-05	HSPH1/NFKBID/ZC3H12A/NFKBIZ/CD83/ICAM1/HSPD1/CD55/DUSP10/SLAMF1/ZBTB16/RHOH	12
GO:0022407	regulation of cell-cell adhesion	13/89	448/18723	1.9089e-07	1.71801e-05	1.27176e-05	HSPH1/NFKBID/ZC3H12A/NFKBIZ/CD83/ICAM1/HSPD1/RGCC/CD55/DUSP10/SLAMF1/ZBTB16/RHOH	13
GO:0002819	regulation of adaptive immune response	9/89	183/18723	2.16987e-07	1.87477e-05	1.3878e-05	NFKBID/ZC3H12A/NFKBIZ/HSPD1/CD55/TNFAIP3/DUSP10/SLAMF1/SAMSN1	9
GO:0030217	T cell differentiation	10/89	257/18723	3.91441e-07	3.25197e-05	2.40729e-05	NFKBID/ZC3H12A/NFKBIZ/CD83/RUNX2/PRDM1/DUSP10/ZBTB16/RHOH/PTGER4	10
GO:0046685	response to arsenic-containing substance	5/89	33/18723	4.62919e-07	3.60567e-05	2.66911e-05	CDKN1A/ZFAND2A/ZC3H12A/SLC38A2/DDX3X	5
GO:0045580	regulation of T cell differentiation	8/89	146/18723	4.67402e-07	3.60567e-05	2.66911e-05	NFKBID/ZC3H12A/NFKBIZ/CD83/PRDM1/DUSP10/ZBTB16/RHOH	8
GO:2001236	regulation of extrinsic apoptotic signaling pathway	8/89	151/18723	6.04187e-07	4.3972e-05	3.25505e-05	HSPA1B/HSPA1A/LMNA/ICAM1/DEDD2/TNFAIP3/DDX3X/PMAIP1	8
GO:0016032	viral process	12/89	415/18723	6.10723e-07	4.3972e-05	3.25505e-05	HSPA1B/HSPA1A/HSP90AB1/HSPA8/ZC3H12A/ICAM1/CXCR4/CD55/SLAMF1/DDX3X/DDX5/ZC3HAV1	12
GO:0072594	establishment of protein localization to organelle	12/89	422/18723	7.28618e-07	5.07682e-05	3.75813e-05	HSP90AA1/DNAJA1/CDKN1A/HSP90AB1/NFKBIA/HSPA8/LMNA/ZFAND2A/ZC3H12A/HSPD1/TNFAIP3/TCP1	12
GO:0046635	positive regulation of alpha-beta T cell activation	6/89	67/18723	7.69152e-07	5.19178e-05	3.84323e-05	HSPH1/NFKBID/NFKBIZ/CD83/CD55/ZBTB16	6
GO:0070431	nucleotide-binding oligomerization domain containing 2 signaling pathway	4/89	16/18723	8.31083e-07	5.33893e-05	3.95216e-05	HSPA1B/HSPA1A/NFKBIA/TNFAIP3	4
GO:0046637	regulation of alpha-beta T cell differentiation	6/89	68/18723	8.40387e-07	5.33893e-05	3.95216e-05	NFKBID/ZC3H12A/NFKBIZ/CD83/PRDM1/ZBTB16	6
GO:0046632	alpha-beta T cell differentiation	7/89	112/18723	1.04366e-06	5.99736e-05	4.43957e-05	NFKBID/ZC3H12A/NFKBIZ/CD83/PRDM1/ZBTB16/PTGER4	7
GO:0045785	positive regulation of cell adhesion	12/89	437/18723	1.05162e-06	5.99736e-05	4.43957e-05	HSPH1/NFKBID/NFKBIZ/CD83/ICAM1/HSPD1/CD55/DOCK5/DUSP10/SLAMF1/ZBTB16/RHOH	12
GO:0071900	regulation of protein serine/threonine kinase activity	11/89	359/18723	1.06134e-06	5.99736e-05	4.43957e-05	DNAJA1/CDKN1A/HSP90AB1/RGS2/DUSP1/RGCC/TNFAIP3/CCNH/CHORDC1/DUSP10/DDX3X	11
GO:0090083	regulation of inclusion body assembly	4/89	17/18723	1.08286e-06	5.99736e-05	4.43957e-05	DNAJB1/HSPA1B/HSPA1A/DNAJB6	4
GO:1900034	regulation of cellular response to heat	4/89	17/18723	1.08286e-06	5.99736e-05	4.43957e-05	DNAJB1/IER5/DNAJB6/CHORDC1	4
GO:0051251	positive regulation of lymphocyte activation	11/89	362/18723	1.1512e-06	6.21648e-05	4.60177e-05	HSPH1/CDKN1A/NFKBID/NFKBIZ/CD83/HSPD1/CD55/DUSP10/SLAMF1/ZBTB16/RHOH	11
GO:1903706	regulation of hemopoiesis	11/89	367/18723	1.31592e-06	6.93265e-05	5.13192e-05	HSPA1B/HSPA1A/NFKBIA/NFKBID/ZC3H12A/NFKBIZ/CD83/PRDM1/DUSP10/ZBTB16/RHOH	11
GO:0030098	lymphocyte differentiation	11/89	374/18723	1.58129e-06	8.13237e-05	6.02002e-05	NFKBID/ZC3H12A/NFKBIZ/CD83/RUNX2/PRDM1/DUSP10/SLAMF1/ZBTB16/RHOH/PTGER4	11
GO:0071901	negative regulation of protein serine/threonine kinase activity	7/89	120/18723	1.66195e-06	8.34843e-05	6.17995e-05	DNAJA1/CDKN1A/RGS2/DUSP1/TNFAIP3/CHORDC1/DUSP10	7
GO:0045619	regulation of lymphocyte differentiation	8/89	174/18723	1.763e-06	8.65472e-05	6.40669e-05	NFKBID/ZC3H12A/NFKBIZ/CD83/PRDM1/DUSP10/ZBTB16/RHOH	8
GO:0071243	cellular response to arsenic-containing substance	4/89	20/18723	2.18049e-06	0.000104663	7.74775e-05	ZFAND2A/ZC3H12A/SLC38A2/DDX3X	4
GO:1903320	regulation of protein modification by small protein conjugation or removal	9/89	242/18723	2.24503e-06	0.000105419	7.80366e-05	HSPA1B/HSP90AA1/DNAJA1/HSPA1A/HSP90AB1/ZC3H12A/TNFAIP3/DDX3X/IVNS1ABP	9
GO:0002696	positive regulation of leukocyte activation	11/89	409/18723	3.74397e-06	0.000172063	0.00012737	HSPH1/CDKN1A/NFKBID/NFKBIZ/CD83/HSPD1/CD55/DUSP10/SLAMF1/ZBTB16/RHOH	11
GO:0051131	chaperone-mediated protein complex assembly	4/89	23/18723	3.94199e-06	0.00017739	0.000131313	HSP90AA1/HSPA1A/HSP90AB1/HSPD1	4
GO:0045582	positive regulation of T cell differentiation	6/89	91/18723	4.68976e-06	0.000203612	0.000150725	NFKBID/NFKBIZ/CD83/DUSP10/ZBTB16/RHOH	6
GO:0070841	inclusion body assembly	4/89	24/18723	4.71324e-06	0.000203612	0.000150725	DNAJB1/HSPA1B/HSPA1A/DNAJB6	4
GO:0050867	positive regulation of cell activation	11/89	420/18723	4.8222e-06	0.000204234	0.000151185	HSPH1/CDKN1A/NFKBID/NFKBIZ/CD83/HSPD1/CD55/DUSP10/SLAMF1/ZBTB16/RHOH	11
GO:0001933	negative regulation of protein phosphorylation	10/89	342/18723	5.13348e-06	0.000210424	0.000155767	DNAJA1/CDKN1A/GADD45B/RGS2/ZC3H12A/DUSP1/TNFAIP3/CHORDC1/DUSP10/SAMSN1	10
GO:0051348	negative regulation of transferase activity	9/89	268/18723	5.16319e-06	0.000210424	0.000155767	DNAJA1/CDKN1A/GADD45B/RGS2/DUSP1/TNFAIP3/CHORDC1/DUSP10/EIF4A2	9
GO:1903131	mononuclear cell differentiation	11/89	426/18723	5.51786e-06	0.000219561	0.000162531	NFKBID/ZC3H12A/NFKBIZ/CD83/RUNX2/PRDM1/DUSP10/SLAMF1/ZBTB16/RHOH/PTGER4	11
GO:0070423	nucleotide-binding oligomerization domain containing signaling pathway	4/89	25/18723	5.59066e-06	0.000219561	0.000162531	HSPA1B/HSPA1A/NFKBIA/TNFAIP3	4
GO:0017038	protein import	8/89	206/18723	6.17187e-06	0.000238058	0.000176223	HSP90AA1/CDKN1A/HSP90AB1/NFKBIA/HSPA8/LMNA/ZC3H12A/HSPD1	8
GO:0034620	cellular response to unfolded protein	6/89	96/18723	6.39982e-06	0.00024252	0.000179526	HSPA1B/HSPA1A/HSPA6/PPP1R15A/HSPA8/HSPD1	6
GO:0035872	nucleotide-binding domain, leucine rich repeat containing receptor signaling pathway	4/89	26/18723	6.5832e-06	0.000244654	0.000181106	HSPA1B/HSPA1A/NFKBIA/TNFAIP3	4
GO:0043484	regulation of RNA splicing	7/89	148/18723	6.70568e-06	0.000244654	0.000181106	HSPA1A/HSPA8/CLK1/SLC38A2/SRSF7/AHNAK/DDX5	7
GO:2001237	negative regulation of extrinsic apoptotic signaling pathway	6/89	97/18723	6.79595e-06	0.000244654	0.000181106	HSPA1B/HSPA1A/LMNA/ICAM1/TNFAIP3/DDX3X	6
GO:0006401	RNA catabolic process	9/89	278/18723	6.94201e-06	0.000245816	0.000181966	HSPA1B/HSPA1A/ZC3H12A/TOB1/DEDD2/BTG2/EIF4A3/DDX5/ZC3HAV1	9
GO:0031396	regulation of protein ubiquitination	8/89	210/18723	7.10714e-06	0.000247604	0.000183289	HSPA1B/HSP90AA1/DNAJA1/HSPA1A/HSP90AB1/TNFAIP3/DDX3X/IVNS1ABP	8
GO:2001233	regulation of apoptotic signaling pathway	10/89	356/18723	7.30227e-06	0.000250364	0.000185332	HSPA1B/DNAJA1/HSPA1A/LMNA/ICAM1/DEDD2/TNFAIP3/DDX3X/PMAIP1/IVNS1ABP	10
GO:0006469	negative regulation of protein kinase activity	8/89	212/18723	7.61802e-06	0.00025435	0.000188284	DNAJA1/CDKN1A/GADD45B/RGS2/DUSP1/TNFAIP3/CHORDC1/DUSP10	8
GO:0045936	negative regulation of phosphate metabolic process	11/89	441/18723	7.65406e-06	0.00025435	0.000188284	DNAJA1/CDKN1A/PPP1R15A/GADD45B/RGS2/ZC3H12A/DUSP1/TNFAIP3/CHORDC1/DUSP10/SAMSN1	11
GO:0010563	negative regulation of phosphorus metabolic process	11/89	442/18723	7.81917e-06	0.0002559	0.000189431	DNAJA1/CDKN1A/PPP1R15A/GADD45B/RGS2/ZC3H12A/DUSP1/TNFAIP3/CHORDC1/DUSP10/SAMSN1	11
GO:0035710	CD4-positive, alpha-beta T cell activation	6/89	102/18723	9.08652e-06	0.000292939	0.000216849	NFKBID/ZC3H12A/NFKBIZ/CD83/CD55/PTGER4	6
GO:0097191	extrinsic apoptotic signaling pathway	8/89	219/18723	9.65779e-06	0.000305158	0.000225894	HSPA1B/HSPA1A/LMNA/ICAM1/DEDD2/TNFAIP3/DDX3X/PMAIP1	8
GO:0034504	protein localization to nucleus	9/89	290/18723	9.7481e-06	0.000305158	0.000225894	CDKN1A/HSP90AB1/NFKBIA/LMNA/GLUL/ZC3H12A/DNAJB6/TCP1/ZBTB16	9
GO:0045621	positive regulation of lymphocyte differentiation	6/89	104/18723	1.01619e-05	0.000313567	0.000232119	NFKBID/NFKBIZ/CD83/DUSP10/ZBTB16/RHOH	6
GO:2000278	regulation of DNA biosynthetic process	6/89	106/18723	1.1338e-05	0.000341457	0.000252765	HSP90AA1/CDKN1A/HSP90AB1/DUSP1/RGCC/TCP1	6
GO:2001234	negative regulation of apoptotic signaling pathway	8/89	224/18723	1.13819e-05	0.000341457	0.000252765	HSPA1B/DNAJA1/HSPA1A/LMNA/ICAM1/TNFAIP3/DDX3X/IVNS1ABP	8
GO:0031647	regulation of protein stability	9/89	298/18723	1.21157e-05	0.000358491	0.000265374	HSPA1B/HSP90AA1/HSPA1A/HSP90AB1/HSPA8/LMNA/HSPD1/TCP1/CCNH	9
GO:0001819	positive regulation of cytokine production	11/89	467/18723	1.30928e-05	0.00038217	0.000282902	HSPA1B/HSP90AA1/HSPA1A/CD83/HSPD1/RGCC/CD55/SLAMF1/DDX3X/PTGER4/IFNGR1	11
GO:0042326	negative regulation of phosphorylation	10/89	385/18723	1.44252e-05	0.000415447	0.000307536	DNAJA1/CDKN1A/GADD45B/RGS2/ZC3H12A/DUSP1/TNFAIP3/CHORDC1/DUSP10/SAMSN1	10
GO:0006402	mRNA catabolic process	8/89	232/18723	1.46781e-05	0.000417167	0.000308809	HSPA1B/HSPA1A/ZC3H12A/TOB1/BTG2/EIF4A3/DDX5/ZC3HAV1	8
GO:0002822	regulation of adaptive immune response based on somatic recombination of immune receptors built from immunoglobulin superfamily domains	7/89	168/18723	1.53478e-05	0.000430536	0.000318706	NFKBID/ZC3H12A/NFKBIZ/HSPD1/CD55/TNFAIP3/SLAMF1	7
GO:2000514	regulation of CD4-positive, alpha-beta T cell activation	5/89	67/18723	1.659e-05	0.000459415	0.000340084	NFKBID/ZC3H12A/NFKBIZ/CD83/CD55	5
GO:0033673	negative regulation of kinase activity	8/89	237/18723	1.71207e-05	0.00046811	0.00034652	DNAJA1/CDKN1A/GADD45B/RGS2/DUSP1/TNFAIP3/CHORDC1/DUSP10	8
GO:0035967	cellular response to topologically incorrect protein	6/89	116/18723	1.8987e-05	0.000512648	0.00037949	HSPA1B/HSPA1A/HSPA6/PPP1R15A/HSPA8/HSPD1	6
GO:0045926	negative regulation of growth	8/89	249/18723	2.44112e-05	0.000650966	0.00048188	HSPA1B/HSPA1A/CDKN1A/RGS2/SMARCA2/TSPYL2/DUSP10/DDX3X	8
GO:0070424	regulation of nucleotide-binding oligomerization domain containing signaling pathway	3/89	13/18723	2.86896e-05	0.000755726	0.000559429	HSPA1B/HSPA1A/TNFAIP3	3
GO:0030308	negative regulation of cell growth	7/89	188/18723	3.167e-05	0.000824183	0.000610104	HSPA1B/HSPA1A/CDKN1A/RGS2/SMARCA2/TSPYL2/DDX3X	7
GO:2000516	positive regulation of CD4-positive, alpha-beta T cell activation	4/89	39/18723	3.45504e-05	0.00088844	0.000657671	NFKBID/NFKBIZ/CD83/CD55	4
GO:0050821	protein stabilization	7/89	191/18723	3.50404e-05	0.000890439	0.00065915	HSPA1B/HSP90AA1/HSPA1A/HSP90AB1/HSPD1/TCP1/CCNH	7
GO:0032496	response to lipopolysaccharide	9/89	343/18723	3.66953e-05	0.000919126	0.000680386	NR4A1/NFKBIA/ZC3H12A/ICAM1/HSPD1/CD55/TNFAIP3/DUSP10/PTGER4	9
GO:0006446	regulation of translational initiation	5/89	79/18723	3.70203e-05	0.000919126	0.000680386	PPP1R15A/EIF1/DDX3X/EIF5/EIF4A2	5
GO:0008625	extrinsic apoptotic signaling pathway via death domain receptors	5/89	82/18723	4.43206e-05	0.00108787	0.0008053	ICAM1/DEDD2/TNFAIP3/DDX3X/PMAIP1	5
GO:0031397	negative regulation of protein ubiquitination	5/89	83/18723	4.69862e-05	0.00112767	0.000834761	HSPA1B/DNAJA1/HSPA1A/TNFAIP3/IVNS1ABP	5
GO:0043367	CD4-positive, alpha-beta T cell differentiation	5/89	83/18723	4.69862e-05	0.00112767	0.000834761	NFKBID/ZC3H12A/NFKBIZ/CD83/PTGER4	5
GO:0051701	biological process involved in interaction with host	7/89	203/18723	5.16117e-05	0.00122507	0.000906861	HSPA1B/HSPA1A/ICAM1/CXCR4/CD55/TCP1/SLAMF1	7
GO:1902105	regulation of leukocyte differentiation	8/89	279/18723	5.47054e-05	0.00128439	0.000950773	NFKBID/ZC3H12A/NFKBIZ/CD83/PRDM1/DUSP10/ZBTB16/RHOH	8
GO:0002237	response to molecule of bacterial origin	9/89	363/18723	5.69042e-05	0.00132165	0.000978354	NR4A1/NFKBIA/ZC3H12A/ICAM1/HSPD1/CD55/TNFAIP3/DUSP10/PTGER4	9
GO:0009615	response to virus	9/89	367/18723	6.19085e-05	0.00142258	0.00105307	HSP90AA1/ZC3H12A/CXCR4/TNFAIP3/DDX3X/PMAIP1/IVNS1ABP/IFNGR1/ZC3HAV1	9
GO:0046718	viral entry into host cell	6/89	144/18723	6.41253e-05	0.00145801	0.00107929	HSPA1B/HSPA1A/ICAM1/CXCR4/CD55/SLAMF1	6
GO:0097193	intrinsic apoptotic signaling pathway	8/89	288/18723	6.8341e-05	0.00153767	0.00113827	DNAJA1/HSPA1A/CDKN1A/PPP1R15A/DDX3X/DDX5/PMAIP1/IVNS1ABP	8
GO:1900744	regulation of p38MAPK cascade	4/89	47/18723	7.27833e-05	0.00162074	0.00119976	GADD45B/ZC3H12A/DUSP1/DUSP10	4
GO:0031669	cellular response to nutrient levels	7/89	215/18723	7.41252e-05	0.00163378	0.00120941	CDKN1A/HSPA8/GLUL/ZC3H12A/ICAM1/SLC38A2/PMAIP1	7
GO:0006417	regulation of translation	10/89	468/18723	7.5305e-05	0.00164302	0.00121625	PPP1R15A/RGS2/ZC3H12A/TOB1/BTG2/EIF1/EIF4A3/DDX3X/EIF5/EIF4A2	10
GO:0044409	entry into host	6/89	151/18723	8.34357e-05	0.00180221	0.00133409	HSPA1B/HSPA1A/ICAM1/CXCR4/CD55/SLAMF1	6
GO:1902041	regulation of extrinsic apoptotic signaling pathway via death domain receptors	4/89	49/18723	8.58337e-05	0.00183565	0.00135885	ICAM1/TNFAIP3/DDX3X/PMAIP1	4
GO:1903321	negative regulation of protein modification by small protein conjugation or removal	5/89	95/18723	8.96647e-05	0.00189878	0.00140558	HSPA1B/DNAJA1/HSPA1A/TNFAIP3/IVNS1ABP	5
GO:0046638	positive regulation of alpha-beta T cell differentiation	4/89	50/18723	9.29603e-05	0.00194946	0.00144309	NFKBID/NFKBIZ/CD83/ZBTB16	4
GO:2000319	regulation of T-helper 17 cell differentiation	3/89	19/18723	9.5216e-05	0.00197619	0.00146288	NFKBID/ZC3H12A/NFKBIZ	3
GO:0016049	cell growth	10/89	482/18723	9.60648e-05	0.00197619	0.00146288	HSPA1B/HSP90AA1/HSPA1A/CDKN1A/HSP90AB1/RGS2/CXCR4/SMARCA2/TSPYL2/DDX3X	10
GO:0009267	cellular response to starvation	6/89	156/18723	9.98692e-05	0.00202893	0.00150192	CDKN1A/HSPA8/GLUL/ZC3H12A/SLC38A2/PMAIP1	6
GO:0043370	regulation of CD4-positive, alpha-beta T cell differentiation	4/89	51/18723	0.000100507	0.00202893	0.00150192	NFKBID/ZC3H12A/NFKBIZ/CD83	4
GO:1902107	positive regulation of leukocyte differentiation	6/89	157/18723	0.000103445	0.00204074	0.00151066	NFKBID/NFKBIZ/CD83/DUSP10/ZBTB16/RHOH	6
GO:1903708	positive regulation of hemopoiesis	6/89	157/18723	0.000103445	0.00204074	0.00151066	NFKBID/NFKBIZ/CD83/DUSP10/ZBTB16/RHOH	6
GO:1904029	regulation of cyclin-dependent protein kinase activity	5/89	98/18723	0.000103926	0.00204074	0.00151066	CDKN1A/HSP90AB1/RGCC/TNFAIP3/CCNH	5
GO:0038066	p38MAPK cascade	4/89	55/18723	0.000135197	0.00262142	0.00194051	GADD45B/ZC3H12A/DUSP1/DUSP10	4
GO:0034655	nucleobase-containing compound catabolic process	9/89	407/18723	0.000135925	0.00262142	0.00194051	HSPA1B/HSPA1A/ZC3H12A/TOB1/DEDD2/BTG2/EIF4A3/DDX5/ZC3HAV1	9
GO:0071496	cellular response to external stimulus	8/89	320/18723	0.000141764	0.00270982	0.00200596	CDKN1A/HSPA8/GLUL/ZC3H12A/ICAM1/SLC38A2/PMAIP1/PTGER4	8
GO:0051403	stress-activated MAPK cascade	7/89	239/18723	0.000143273	0.00271464	0.00200952	DNAJA1/GADD45B/ZC3H12A/DUSP1/DUSP10/SLAMF1/PTGER4	7
GO:0002824	positive regulation of adaptive immune response based on somatic recombination of immune receptors built from immunoglobulin superfamily domains	5/89	107/18723	0.000157328	0.00295503	0.00218747	NFKBID/NFKBIZ/HSPD1/CD55/SLAMF1	5
GO:0002221	pattern recognition receptor signaling pathway	6/89	172/18723	0.000170423	0.00314196	0.00232585	HSPA1B/HSPA1A/NFKBIA/HSPD1/TNFAIP3/DDX3X	6
GO:0031668	cellular response to extracellular stimulus	7/89	246/18723	0.000171162	0.00314196	0.00232585	CDKN1A/HSPA8/GLUL/ZC3H12A/ICAM1/SLC38A2/PMAIP1	7
GO:0045932	negative regulation of muscle contraction	3/89	23/18723	0.000171644	0.00314196	0.00232585	RGS2/ZC3H12A/DOCK5	3
GO:0031098	stress-activated protein kinase signaling cascade	7/89	247/18723	0.000175482	0.00317437	0.00234984	DNAJA1/GADD45B/ZC3H12A/DUSP1/DUSP10/SLAMF1/PTGER4	7
GO:0002820	negative regulation of adaptive immune response	4/89	59/18723	0.000177824	0.00317437	0.00234984	ZC3H12A/CD55/SLAMF1/SAMSN1	4
GO:0043407	negative regulation of MAP kinase activity	4/89	59/18723	0.000177824	0.00317437	0.00234984	DNAJA1/RGS2/DUSP1/DUSP10	4
GO:0052126	movement in host environment	6/89	175/18723	0.000187206	0.00331447	0.00245354	HSPA1B/HSPA1A/ICAM1/CXCR4/CD55/SLAMF1	6
GO:0002753	cytoplasmic pattern recognition receptor signaling pathway	4/89	60/18723	0.000189838	0.00333373	0.00246781	HSPA1B/HSPA1A/NFKBIA/TNFAIP3	4
GO:0031331	positive regulation of cellular catabolic process	9/89	427/18723	0.000194582	0.00334075	0.002473	HSPA1B/HSP90AA1/HSPA1A/ZFAND2A/ZC3H12A/TOB1/BTG2/TNFAIP3/ZC3HAV1	9
GO:0000956	nuclear-transcribed mRNA catabolic process	5/89	112/18723	0.000194877	0.00334075	0.002473	ZC3H12A/TOB1/BTG2/EIF4A3/DDX5	5
GO:0002821	positive regulation of adaptive immune response	5/89	112/18723	0.000194877	0.00334075	0.002473	NFKBID/NFKBIZ/HSPD1/CD55/SLAMF1	5
GO:0002697	regulation of immune effector process	8/89	339/18723	0.000210083	0.00357196	0.00264415	NFKBID/ZC3H12A/NFKBIZ/ICAM1/HSPD1/CD55/DUSP10/SLAMF1	8
GO:0002286	T cell activation involved in immune response	5/89	114/18723	0.000211672	0.00357196	0.00264415	NFKBID/ZC3H12A/NFKBIZ/ICAM1/PTGER4	5
GO:0045428	regulation of nitric oxide biosynthetic process	4/89	62/18723	0.000215605	0.00359256	0.00265941	HSP90AA1/HSP90AB1/ZC3H12A/ICAM1	4
GO:0071897	DNA biosynthetic process	6/89	180/18723	0.000218056	0.00359256	0.00265941	HSP90AA1/CDKN1A/HSP90AB1/DUSP1/RGCC/TCP1	6
GO:0002683	negative regulation of immune system process	9/89	434/18723	0.000219545	0.00359256	0.00265941	ZC3H12A/DUSP1/TSC22D3/CD55/TNFAIP3/DUSP10/SLAMF1/SAMSN1/PTGER4	9
GO:0008380	RNA splicing	9/89	434/18723	0.000219545	0.00359256	0.00265941	HSPA1A/HSPA8/CLK1/SLC38A2/SRSF7/EIF4A3/AHNAK/DDX5/IVNS1ABP	9
GO:2000316	regulation of T-helper 17 type immune response	3/89	25/18723	0.000221387	0.00359546	0.00266155	NFKBID/ZC3H12A/NFKBIZ	3
GO:0080164	regulation of nitric oxide metabolic process	4/89	64/18723	0.000243802	0.00392994	0.00290915	HSP90AA1/HSP90AB1/ZC3H12A/ICAM1	4
GO:0006413	translational initiation	5/89	118/18723	0.00024855	0.00394756	0.0029222	PPP1R15A/EIF1/DDX3X/EIF5/EIF4A2	5
GO:1903313	positive regulation of mRNA metabolic process	5/89	118/18723	0.00024855	0.00394756	0.0029222	HSPA8/ZC3H12A/TOB1/BTG2/ZC3HAV1	5
GO:0046700	heterocycle catabolic process	9/89	445/18723	0.000264133	0.00416444	0.00308274	HSPA1B/HSPA1A/ZC3H12A/TOB1/DEDD2/BTG2/EIF4A3/DDX5/ZC3HAV1	9
GO:0030522	intracellular receptor signaling pathway	7/89	265/18723	0.000269621	0.00422016	0.00312399	HSPA1B/DNAJA1/NR4A1/HSPA1A/NFKBIA/TNFAIP3/DDX5	7
GO:0042093	T-helper cell differentiation	4/89	66/18723	0.000274557	0.00423602	0.00313573	NFKBID/ZC3H12A/NFKBIZ/PTGER4	4
GO:2000573	positive regulation of DNA biosynthetic process	4/89	66/18723	0.000274557	0.00423602	0.00313573	HSP90AA1/HSP90AB1/RGCC/TCP1	4
GO:0044270	cellular nitrogen compound catabolic process	9/89	451/18723	0.000291467	0.00444538	0.00329071	HSPA1B/HSPA1A/ZC3H12A/TOB1/DEDD2/BTG2/EIF4A3/DDX5/ZC3HAV1	9
GO:0002460	adaptive immune response based on somatic recombination of immune receptors built from immunoglobulin superfamily domains	8/89	356/18723	0.000292242	0.00444538	0.00329071	NFKBID/ZC3H12A/NFKBIZ/ICAM1/HSPD1/CD55/TNFAIP3/SLAMF1	8
GO:0002294	CD4-positive, alpha-beta T cell differentiation involved in immune response	4/89	68/18723	0.000308004	0.00462843	0.00342621	NFKBID/ZC3H12A/NFKBIZ/PTGER4	4
GO:0032872	regulation of stress-activated MAPK cascade	6/89	192/18723	0.000308562	0.00462843	0.00342621	DNAJA1/GADD45B/ZC3H12A/DUSP1/DUSP10/SLAMF1	6
GO:0002287	alpha-beta T cell activation involved in immune response	4/89	69/18723	0.000325779	0.00476004	0.00352364	NFKBID/ZC3H12A/NFKBIZ/PTGER4	4
GO:0002293	alpha-beta T cell differentiation involved in immune response	4/89	69/18723	0.000325779	0.00476004	0.00352364	NFKBID/ZC3H12A/NFKBIZ/PTGER4	4
GO:0002285	lymphocyte activation involved in immune response	6/89	194/18723	0.000326151	0.00476004	0.00352364	NFKBID/ZC3H12A/NFKBIZ/ICAM1/HSPD1/PTGER4	6
GO:0050777	negative regulation of immune response	6/89	194/18723	0.000326151	0.00476004	0.00352364	ZC3H12A/CD55/TNFAIP3/DUSP10/SLAMF1/SAMSN1	6
GO:0070302	regulation of stress-activated protein kinase signaling cascade	6/89	195/18723	0.000335236	0.00485744	0.00359573	DNAJA1/GADD45B/ZC3H12A/DUSP1/DUSP10/SLAMF1	6
GO:0002366	leukocyte activation involved in immune response	7/89	275/18723	0.000337322	0.00485744	0.00359573	NFKBID/ZC3H12A/NFKBIZ/ICAM1/HSPD1/SLAMF1/PTGER4	7
GO:0072539	T-helper 17 cell differentiation	3/89	29/18723	0.000346915	0.0049625	0.00367351	NFKBID/ZC3H12A/NFKBIZ	3
GO:0042594	response to starvation	6/89	197/18723	0.000354	0.00503052	0.00372386	CDKN1A/HSPA8/GLUL/ZC3H12A/SLC38A2/PMAIP1	6
GO:0002263	cell activation involved in immune response	7/89	279/18723	0.000367954	0.00519465	0.00384536	NFKBID/ZC3H12A/NFKBIZ/ICAM1/HSPD1/SLAMF1/PTGER4	7
GO:0019439	aromatic compound catabolic process	9/89	467/18723	0.000376047	0.00527443	0.00390442	HSPA1B/HSPA1A/ZC3H12A/TOB1/DEDD2/BTG2/EIF4A3/DDX5/ZC3HAV1	9
GO:0002764	immune response-regulating signaling pathway	9/89	468/18723	0.000381944	0.00532258	0.00394006	HSPA1B/HSPA1A/NFKBIA/NFKBID/ZC3H12A/NFKBIZ/HSPD1/TNFAIP3/DDX3X	9
GO:0045862	positive regulation of proteolysis	8/89	372/18723	0.000391982	0.00542744	0.00401768	HSPA1B/HSPA1A/ZFAND2A/ZC3H12A/HSPD1/HSPE1/DDX3X/PMAIP1	8
GO:0019079	viral genome replication	5/89	131/18723	0.000402829	0.00554211	0.00410256	HSPA8/ZC3H12A/DDX3X/DDX5/ZC3HAV1	5
GO:1902042	negative regulation of extrinsic apoptotic signaling pathway via death domain receptors	3/89	31/18723	0.00042384	0.00579427	0.00428923	ICAM1/TNFAIP3/DDX3X	3
GO:1903311	regulation of mRNA metabolic process	7/89	288/18723	0.000445066	0.00604619	0.00447571	HSPA8/ZC3H12A/TOB1/BTG2/SRSF7/DDX5/ZC3HAV1	7
GO:0002292	T cell differentiation involved in immune response	4/89	75/18723	0.000448213	0.00605087	0.00447918	NFKBID/ZC3H12A/NFKBIZ/PTGER4	4
GO:0043372	positive regulation of CD4-positive, alpha-beta T cell differentiation	3/89	32/18723	0.000466083	0.00625304	0.00462883	NFKBID/NFKBIZ/CD83	3
GO:0006809	nitric oxide biosynthetic process	4/89	76/18723	0.000471409	0.00628545	0.00465282	HSP90AA1/HSP90AB1/ZC3H12A/ICAM1	4
GO:1900180	regulation of protein localization to nucleus	5/89	136/18723	0.000478235	0.00633734	0.00469124	HSP90AB1/LMNA/GLUL/ZC3H12A/TCP1	5
GO:0043281	regulation of cysteine-type endopeptidase activity involved in apoptotic process	6/89	209/18723	0.000484538	0.00638171	0.00472409	NR4A1/HSPD1/DNAJB6/HSPE1/DDX3X/PMAIP1	6
GO:0045786	negative regulation of cell cycle	8/89	385/18723	0.000492073	0.00644168	0.00476847	NR4A1/CDKN1A/DUSP1/RGCC/BTG2/TNFAIP3/HECA/TSPYL2	8
GO:0001975	response to amphetamine	3/89	33/18723	0.000510934	0.00660849	0.00489196	NR4A1/RGS2/ICAM1	3
GO:1904031	positive regulation of cyclin-dependent protein kinase activity	3/89	33/18723	0.000510934	0.00660849	0.00489196	CDKN1A/HSP90AB1/RGCC	3
GO:0009896	positive regulation of catabolic process	9/89	492/18723	0.000548162	0.0070478	0.00521715	HSPA1B/HSP90AA1/HSPA1A/ZFAND2A/ZC3H12A/TOB1/BTG2/TNFAIP3/ZC3HAV1	9
GO:0051973	positive regulation of telomerase activity	3/89	34/18723	0.00055846	0.00713771	0.00528372	HSP90AA1/HSP90AB1/TCP1	3
GO:1901361	organic cyclic compound catabolic process	9/89	495/18723	0.000572583	0.00727517	0.00538547	HSPA1B/HSPA1A/ZC3H12A/TOB1/DEDD2/BTG2/EIF4A3/DDX5/ZC3HAV1	9
GO:0046209	nitric oxide metabolic process	4/89	81/18723	0.000600383	0.00758378	0.00561392	HSP90AA1/HSP90AB1/ZC3H12A/ICAM1	4
GO:2001057	reactive nitrogen species metabolic process	4/89	82/18723	0.000628899	0.0078978	0.00584637	HSP90AA1/HSP90AB1/ZC3H12A/ICAM1	4
GO:0051384	response to glucocorticoid	5/89	148/18723	0.000702357	0.00876931	0.00649151	CDKN1A/DUSP1/ICAM1/HSPD1/AREG	5
GO:0033120	positive regulation of RNA splicing	3/89	37/18723	0.000717715	0.00890957	0.00659534	HSPA1A/HSPA8/SLC38A2	3
GO:0001959	regulation of cytokine-mediated signaling pathway	5/89	150/18723	0.000746247	0.00921082	0.00681834	HSPA1B/HSPA1A/HSP90AB1/CXCR4/TNFAIP3	5
GO:0072538	T-helper 17 type immune response	3/89	38/18723	0.000776566	0.00953058	0.00705505	NFKBID/ZC3H12A/NFKBIZ	3
GO:0071356	cellular response to tumor necrosis factor	6/89	229/18723	0.000782423	0.00953858	0.00706097	HSPA1B/HSPA1A/NFKBIA/ZC3H12A/ICAM1/TNFAIP3	6
GO:0061014	positive regulation of mRNA catabolic process	4/89	87/18723	0.00078605	0.00953858	0.00706097	ZC3H12A/TOB1/BTG2/ZC3HAV1	4
GO:0001558	regulation of cell growth	8/89	414/18723	0.000791048	0.00954561	0.00706617	HSPA1B/HSPA1A/CDKN1A/RGS2/CXCR4/SMARCA2/TSPYL2/DDX3X	8

## Sheet: ILC3_c3
ID	Description	GeneRatio	BgRatio	pvalue	p.adjust	qvalue	geneID	Count
GO:0002181	cytoplasmic translation	21/276	148/18723	5.03345e-15	1.79342e-11	1.5503e-11	RPL31/RPL7/RPL23/RPS29/RPS10/RPL27A/RPS11/RPLP1/RPS20/RPL37A/RPS6/RPL23A/RPL27/RPL38/RPL37/RPL15/RPLP2/RPS9/RPS16/RPL10A/RPL13	21
GO:0042110	T cell activation	28/276	487/18723	8.81756e-10	1.57085e-06	1.3579e-06	TNFSF13B/IL23R/GSN/ZFP36L1/CD74/CD2/B2M/IL4I1/FCER1G/TMIGD2/TCF7/PPP3CA/IL7R/CD81/TNFSF4/TNFRSF4/TOX/SLAMF6/RORC/HLA-E/PRKAR1A/RPS6/RAC2/LY9/CHD7/EGR1/BCL6/PREX1	28
GO:0030098	lymphocyte differentiation	23/276	374/18723	8.67427e-09	8.4658e-06	7.31818e-06	TNFSF13B/IL23R/ZFP36L1/CD74/CD2/B2M/IL4I1/FCER1G/TCF7/RBPJ/IL7R/HDAC9/TNFSF4/TOX/SLAMF6/ID2/RORC/RPS6/LY9/CHD7/EGR1/BCL6/PREX1	23
GO:0030217	T cell differentiation	19/276	257/18723	9.50413e-09	8.4658e-06	7.31818e-06	IL23R/ZFP36L1/CD74/CD2/B2M/IL4I1/FCER1G/TCF7/IL7R/TNFSF4/TOX/SLAMF6/RORC/RPS6/LY9/CHD7/EGR1/BCL6/PREX1	19
GO:0002697	regulation of immune effector process	21/276	339/18723	3.47809e-08	2.47848e-05	2.1425e-05	IL23R/CD74/B2M/SH2D1B/TYROBP/IL4I1/IL1R1/IL7R/CD81/BST2/TNFSF4/TNFRSF4/CD96/SLAMF6/IRAK3/HLA-E/VAMP8/STAP1/TMBIM6/RAC2/BCL6	21
GO:0002703	regulation of leukocyte mediated immunity	17/276	226/18723	4.5212e-08	2.68484e-05	2.32088e-05	IL23R/B2M/SH2D1B/TYROBP/IL4I1/IL1R1/IL7R/CD81/BST2/TNFSF4/CD96/SLAMF6/HLA-E/VAMP8/STAP1/RAC2/BCL6	17
GO:1903131	mononuclear cell differentiation	23/276	426/18723	9.51939e-08	4.84537e-05	4.18853e-05	TNFSF13B/IL23R/ZFP36L1/CD74/CD2/B2M/IL4I1/FCER1G/TCF7/RBPJ/IL7R/HDAC9/TNFSF4/TOX/SLAMF6/ID2/RORC/RPS6/LY9/CHD7/EGR1/BCL6/PREX1	23
GO:0002443	leukocyte mediated immunity	23/276	440/18723	1.69836e-07	7.56406e-05	6.53867e-05	IL23R/CD74/B2M/SH2D1B/TYROBP/IL4I1/FCER1G/TRBC1/IL1R1/IL7R/CD81/BST2/TNFSF4/CTSH/CD96/SLAMF6/PTGDR/HLA-E/VAMP8/STAP1/RAC2/LAT2/BCL6	23
GO:0002274	myeloid leukocyte activation	16/276	223/18723	2.16859e-07	8.58522e-05	7.42141e-05	CD300LF/CD74/CD2/TYROBP/FCER1G/RBPJ/ADAM10/JUND/PTGDR/VAMP8/STAP1/RAC2/PLSCR1/LCP2/LAT2/PREX1	16
GO:0043484	regulation of RNA splicing	13/276	148/18723	3.03766e-07	0.000108232	9.356e-05	HNRNPH1/CIRBP/SON/HNRNPK/SRSF6/LARP7/TMBIM6/TRA2A/SRSF3/RBM3/SRSF5/CELF2/HNRNPA1	13
GO:0050684	regulation of mRNA processing	12/276	137/18723	8.9841e-07	0.000291003	0.000251555	ZFP36L1/CIRBP/SON/HNRNPK/SRSF6/LARP7/TRA2A/SRSF3/RBM3/SLTM/CELF2/HNRNPA1	12
GO:0002718	regulation of cytokine production involved in immune response	10/276	96/18723	1.52281e-06	0.000452149	0.000390855	CD74/B2M/IL1R1/CD81/BST2/TNFSF4/CD96/IRAK3/HLA-E/BCL6	10
GO:0001819	positive regulation of cytokine production	22/276	467/18723	1.80529e-06	0.000468924	0.000405356	LTB/IL23R/CD74/CD2/B2M/TYROBP/FCER1G/TMIGD2/IL1R1/TXK/CD81/TNFSF4/SLAMF6/IRAK3/HLA-E/LY9/STAT1/GBP5/EGR1/ATP6AP2/TRIM56/FURIN	22
GO:0002367	cytokine production involved in immune response	10/276	98/18723	1.84253e-06	0.000468924	0.000405356	CD74/B2M/IL1R1/CD81/BST2/TNFSF4/CD96/IRAK3/HLA-E/BCL6	10
GO:0048024	regulation of mRNA splicing, via spliceosome	10/276	101/18723	2.43141e-06	0.000577541	0.000499249	CIRBP/SON/HNRNPK/SRSF6/LARP7/TRA2A/SRSF3/RBM3/CELF2/HNRNPA1	10
GO:0002366	leukocyte activation involved in immune response	16/276	275/18723	3.48132e-06	0.000759338	0.000656403	IL23R/CD74/SH2D1B/TYROBP/FCER1G/CD81/TNFSF4/SLAMF6/PTGDR/RORC/VAMP8/RPS6/RAC2/LY9/LAT2/BCL6	16
GO:0070663	regulation of leukocyte proliferation	15/276	245/18723	3.7981e-06	0.000759338	0.000656403	TNFSF13B/LST1/IL23R/CD74/TYROBP/IL4I1/TMIGD2/CD81/BST2/TNFSF4/TNFRSF4/HLA-E/PRKAR1A/RAC2/BCL6	15
GO:0016032	viral process	20/276	415/18723	3.83612e-06	0.000759338	0.000656403	GSN/CD74/CFL1/NRP1/CD81/BST2/TNFRSF4/VTA1/LARP7/VAMP8/APOBEC3C/MGAT4A/STAT1/PLSCR1/IFITM2/PPIA/DEK/MDFIC/ITGB7/FURIN	20
GO:0002263	cell activation involved in immune response	16/276	279/18723	4.18866e-06	0.000785484	0.000679004	IL23R/CD74/SH2D1B/TYROBP/FCER1G/CD81/TNFSF4/SLAMF6/PTGDR/RORC/VAMP8/RPS6/RAC2/LY9/LAT2/BCL6	16
GO:0070661	leukocyte proliferation	17/276	318/18723	5.36498e-06	0.000935722	0.000808876	TNFSF13B/LST1/IL23R/CD74/TYROBP/IL4I1/TMIGD2/IL7R/CD81/BST2/TNFSF4/TNFRSF4/HLA-E/PRKAR1A/RPS6/RAC2/BCL6	17
GO:0002700	regulation of production of molecular mediator of immune response	12/276	164/18723	5.94851e-06	0.000935722	0.000808876	CD74/B2M/IL1R1/CD81/BST2/TNFSF4/TNFRSF4/CD96/IRAK3/HLA-E/TMBIM6/BCL6	12
GO:0046651	lymphocyte proliferation	16/276	288/18723	6.2715e-06	0.000935722	0.000808876	TNFSF13B/LST1/IL23R/CD74/TYROBP/IL4I1/TMIGD2/IL7R/CD81/TNFSF4/TNFRSF4/HLA-E/PRKAR1A/RPS6/RAC2/BCL6	16
GO:0050670	regulation of lymphocyte proliferation	14/276	225/18723	6.65864e-06	0.000935722	0.000808876	TNFSF13B/LST1/IL23R/CD74/TYROBP/IL4I1/TMIGD2/CD81/TNFSF4/TNFRSF4/HLA-E/PRKAR1A/RAC2/BCL6	14
GO:0032943	mononuclear cell proliferation	16/276	291/18723	7.14811e-06	0.000935722	0.000808876	TNFSF13B/LST1/IL23R/CD74/TYROBP/IL4I1/TMIGD2/IL7R/CD81/TNFSF4/TNFRSF4/HLA-E/PRKAR1A/RPS6/RAC2/BCL6	16
GO:0002286	T cell activation involved in immune response	10/276	114/18723	7.28177e-06	0.000935722	0.000808876	IL23R/CD74/FCER1G/CD81/TNFSF4/SLAMF6/RORC/RPS6/LY9/BCL6	10
GO:0032944	regulation of mononuclear cell proliferation	14/276	227/18723	7.36933e-06	0.000935722	0.000808876	TNFSF13B/LST1/IL23R/CD74/TYROBP/IL4I1/TMIGD2/CD81/TNFSF4/TNFRSF4/HLA-E/PRKAR1A/RAC2/BCL6	14
GO:0032970	regulation of actin filament-based process	19/276	397/18723	7.43146e-06	0.000935722	0.000808876	GSN/TMSB4X/PFN1/NRP1/SRI/BST2/ARPC4/PHPT1/RHOC/ARPC5/ABRACL/GMFG/CAPG/STAP1/RAC2/ARHGDIB/ARPC2/ACTR2/PREX1	19
GO:0002683	negative regulation of immune system process	20/276	434/18723	7.46332e-06	0.000935722	0.000808876	LST1/CD300LF/CD74/TYROBP/IL4I1/IL7R/BST2/TNFSF4/CD96/DUSP1/PHPT1/IRAK3/ID2/HLA-E/PRKAR1A/LPXN/STAP1/TMBIM6/BCL6/FURIN	20
GO:0002706	regulation of lymphocyte mediated immunity	12/276	168/18723	7.61604e-06	0.000935722	0.000808876	IL23R/B2M/SH2D1B/IL4I1/IL1R1/IL7R/CD81/TNFSF4/CD96/SLAMF6/HLA-E/BCL6	12
GO:0042113	B cell activation	17/276	334/18723	1.02278e-05	0.00121473	0.00105006	TNFSF13B/ZFP36L1/CD74/TYROBP/IL4I1/TRBC1/RBPJ/IL7R/SKAP2/HDAC9/CD81/BST2/TNFSF4/TNFRSF4/ID2/LAT2/BCL6	17
GO:0002699	positive regulation of immune effector process	14/276	235/18723	1.09317e-05	0.00125644	0.00108611	IL23R/CD74/B2M/SH2D1B/TYROBP/IL1R1/CD81/TNFSF4/TNFRSF4/SLAMF6/HLA-E/VAMP8/STAP1/RAC2	14
GO:0002696	positive regulation of leukocyte activation	19/276	409/18723	1.13186e-05	0.00126026	0.00108942	TNFSF13B/IL23R/CD74/CD2/B2M/TYROBP/IL4I1/TMIGD2/TRBC1/IL7R/JUND/CD81/TNFSF4/TNFRSF4/TOX/HLA-E/VAMP8/STAP1/BCL6	19
GO:0050867	positive regulation of cell activation	19/276	420/18723	1.63964e-05	0.00177032	0.00153033	TNFSF13B/IL23R/CD74/CD2/B2M/TYROBP/IL4I1/TMIGD2/TRBC1/IL7R/JUND/CD81/TNFSF4/TNFRSF4/TOX/HLA-E/VAMP8/STAP1/BCL6	19
GO:0032103	positive regulation of response to external stimulus	19/276	427/18723	2.061e-05	0.00215981	0.00186703	CD74/TMSB4X/SH2D1B/TYROBP/NRP1/TXK/ADAM10/TGM2/CD81/TNFSF4/SLAMF6/HLA-E/VAMP8/STAP1/RAC2/PRKCA/GBP5/PLSCR1/P2RX4	19
GO:1902107	positive regulation of leukocyte differentiation	11/276	157/18723	2.18869e-05	0.0021662	0.00187255	IL23R/ZFP36L1/CD74/TYROBP/IL4I1/IL7R/TNFSF4/TOX/ID2/PRKCA/BCL6	11
GO:1903708	positive regulation of hemopoiesis	11/276	157/18723	2.18869e-05	0.0021662	0.00187255	IL23R/ZFP36L1/CD74/TYROBP/IL4I1/IL7R/TNFSF4/TOX/ID2/PRKCA/BCL6	11
GO:0002460	adaptive immune response based on somatic recombination of immune receptors built from immunoglobulin superfamily domains	17/276	356/18723	2.3247e-05	0.00223862	0.00193515	TNFSF13B/IL23R/CD74/B2M/IL4I1/FCER1G/TRBC1/IL1R1/IL7R/CD81/TNFSF4/CTSH/SLAMF6/RORC/HLA-E/LY9/BCL6	17
GO:0032956	regulation of actin cytoskeleton organization	17/276	358/18723	2.4961e-05	0.00229592	0.00198469	GSN/TMSB4X/PFN1/NRP1/BST2/ARPC4/PHPT1/RHOC/ARPC5/GMFG/CAPG/STAP1/RAC2/ARHGDIB/ARPC2/ACTR2/PREX1	17
GO:0019221	cytokine-mediated signaling pathway	20/276	472/18723	2.51308e-05	0.00229592	0.00198469	TNFSF13B/IL23R/CD300LF/CD74/TMSB4X/TNFRSF25/FCER1G/IL1R1/TXK/IL7R/TNFRSF18/TNFRSF4/IL2RG/UGCG/IRAK3/STAP1/STAT1/EGR1/IFITM2/BIRC3	20
GO:0045785	positive regulation of cell adhesion	19/276	437/18723	2.83129e-05	0.00252197	0.00218009	TNFSF13B/IL23R/CD74/B2M/IL4I1/NRP1/TMIGD2/PPP3CA/IL7R/TNFRSF18/TGM2/CD81/TNFSF4/HLA-E/PRKCA/ARPC2/BCL6/SPOCK2/PREX1	19
GO:0002705	positive regulation of leukocyte mediated immunity	10/276	134/18723	3.01439e-05	0.00261958	0.00226447	IL23R/B2M/SH2D1B/TYROBP/IL1R1/CD81/TNFSF4/SLAMF6/HLA-E/STAP1	10
GO:0050863	regulation of T cell activation	16/276	329/18723	3.24825e-05	0.0027556	0.00238205	TNFSF13B/IL23R/CD74/CD2/B2M/IL4I1/TMIGD2/TCF7/IL7R/CD81/TNFSF4/TOX/HLA-E/PRKAR1A/RAC2/BCL6	16
GO:0002456	T cell mediated immunity	9/276	109/18723	3.39999e-05	0.00279324	0.00241459	IL23R/B2M/IL4I1/IL1R1/IL7R/CD81/TNFSF4/CTSH/HLA-E	9
GO:0045576	mast cell activation	7/276	62/18723	3.44941e-05	0.00279324	0.00241459	CD300LF/PTGDR/VAMP8/RAC2/PLSCR1/LCP2/LAT2	7
GO:0002709	regulation of T cell mediated immunity	8/276	85/18723	3.63443e-05	0.00283171	0.00244785	IL23R/B2M/IL4I1/IL1R1/IL7R/CD81/TNFSF4/HLA-E	8
GO:0002698	negative regulation of immune effector process	9/276	110/18723	3.65587e-05	0.00283171	0.00244785	IL4I1/IL7R/BST2/TNFSF4/CD96/IRAK3/HLA-E/TMBIM6/BCL6	9
GO:0045619	regulation of lymphocyte differentiation	11/276	174/18723	5.63965e-05	0.00427534	0.00369577	IL23R/ZFP36L1/CD74/CD2/IL4I1/TCF7/IL7R/TNFSF4/TOX/ID2/BCL6	11
GO:0048525	negative regulation of viral process	8/276	92/18723	6.43263e-05	0.00477489	0.00412761	GSN/BST2/LARP7/APOBEC3C/STAT1/PLSCR1/IFITM2/PPIA	8
GO:0002449	lymphocyte mediated immunity	16/276	350/18723	6.7872e-05	0.00493526	0.00426624	IL23R/CD74/B2M/SH2D1B/IL4I1/FCER1G/TRBC1/IL1R1/IL7R/CD81/TNFSF4/CTSH/CD96/SLAMF6/HLA-E/BCL6	16
GO:0051014	actin filament severing	4/276	16/18723	7.31272e-05	0.00521104	0.00450464	GSN/CFL1/GMFG/CAPG	4
GO:0019058	viral life cycle	15/276	317/18723	7.79357e-05	0.00533584	0.00461252	GSN/CD74/NRP1/CD81/BST2/TNFRSF4/VTA1/VAMP8/APOBEC3C/PLSCR1/IFITM2/PPIA/DEK/ITGB7/FURIN	15
GO:0070665	positive regulation of leukocyte proliferation	10/276	150/18723	7.86841e-05	0.00533584	0.00461252	TNFSF13B/IL23R/CD74/TMIGD2/CD81/BST2/TNFSF4/TNFRSF4/HLA-E/BCL6	10
GO:0042773	ATP synthesis coupled electron transport	8/276	95/18723	8.08688e-05	0.00533584	0.00461252	UQCRQ/NDUFB2/NDUFA4/COX6C/NDUFA12/ISCU/UQCR10/COX8A	8
GO:0042775	mitochondrial ATP synthesis coupled electron transport	8/276	95/18723	8.08688e-05	0.00533584	0.00461252	UQCRQ/NDUFB2/NDUFA4/COX6C/NDUFA12/ISCU/UQCR10/COX8A	8
GO:0030168	platelet activation	9/276	123/18723	8.77436e-05	0.00568419	0.00491364	FCER1G/ACTB/TXK/CLIC1/PRKCA/PLSCR1/DGKA/PPIA/GNAS	9
GO:0090713	immunological memory process	4/276	17/18723	9.45223e-05	0.00601398	0.00519873	IL23R/CD81/TNFSF4/BCL6	4
GO:1903311	regulation of mRNA metabolic process	14/276	288/18723	0.000101447	0.00634134	0.00548171	ZFP36L1/CIRBP/SON/HNRNPK/SRSF6/LARP7/POLR2G/PRKCA/TRA2A/SRSF3/RBM3/SLTM/CELF2/HNRNPA1	14
GO:0097529	myeloid leukocyte migration	12/276	220/18723	0.000108503	0.00666545	0.00576188	CD74/FCER1G/IL1R1/PECAM1/CD81/DUSP1/CKLF/STAP1/RAC2/PPIA/P2RX4/PREX1	12
GO:0045010	actin nucleation	6/276	52/18723	0.000112006	0.00676403	0.0058471	GSN/ARPC4/ARPC5/GMFG/ARPC2/ACTR2	6
GO:0002292	T cell differentiation involved in immune response	7/276	75/18723	0.000118298	0.00702491	0.00607261	IL23R/FCER1G/TNFSF4/SLAMF6/RORC/LY9/BCL6	7
GO:0035710	CD4-positive, alpha-beta T cell activation	8/276	102/18723	0.000133527	0.00779927	0.006742	IL23R/CD81/TNFSF4/TOX/SLAMF6/RORC/LY9/BCL6	8
GO:0070262	peptidyl-serine dephosphorylation	4/276	19/18723	0.0001504	0.00864314	0.00747148	PPP3CA/DUSP1/PPP1CA/PPP1R15A	4
GO:0050792	regulation of viral process	10/276	164/18723	0.000164755	0.0093178	0.00805468	GSN/CD74/BST2/LARP7/APOBEC3C/STAT1/PLSCR1/IFITM2/PPIA/MDFIC	10
GO:0001912	positive regulation of leukocyte mediated cytotoxicity	6/276	56/18723	0.000170052	0.00932145	0.00805784	IL23R/B2M/TYROBP/SLAMF6/HLA-E/STAP1	6
GO:0002711	positive regulation of T cell mediated immunity	6/276	56/18723	0.000170052	0.00932145	0.00805784	IL23R/B2M/IL1R1/CD81/TNFSF4/HLA-E	6
GO:0050864	regulation of B cell activation	11/276	198/18723	0.000178268	0.00962377	0.00831917	TNFSF13B/ZFP36L1/CD74/TYROBP/IL4I1/TRBC1/CD81/TNFSF4/TNFRSF4/ID2/BCL6	11
GO:0043555	regulation of translation in response to stress	4/276	20/18723	0.000185829	0.00976038	0.00843726	PPP1CA/TMED2/PPP1R15A/RPS6KA3	4
GO:0042098	T cell proliferation	11/276	199/18723	0.000186277	0.00976038	0.00843726	TNFSF13B/IL23R/IL4I1/TMIGD2/CD81/TNFSF4/TNFRSF4/HLA-E/PRKAR1A/RPS6/RAC2	11
GO:0032535	regulation of cellular component size	16/276	383/18723	0.00019187	0.0099077	0.00856461	GSN/TMSB4X/PFN1/NRP1/IL7R/ARPC4/ARPC5/GMFG/PPP1CA/CAPG/TMEM123/ARPC2/SLC9A3R1/ACTR2/PPP1R15A/PREX1	16
GO:0043368	positive T cell selection	5/276	37/18723	0.000198881	0.00992232	0.00857725	IL23R/CD74/TOX/SLAMF6/LY9	5
GO:0050671	positive regulation of lymphocyte proliferation	9/276	137/18723	0.00019977	0.00992232	0.00857725	TNFSF13B/IL23R/CD74/TMIGD2/CD81/TNFSF4/TNFRSF4/HLA-E/BCL6	9
GO:0002822	regulation of adaptive immune response based on somatic recombination of immune receptors built from immunoglobulin superfamily domains	10/276	168/18723	0.000200507	0.00992232	0.00857725	TNFSF13B/IL23R/B2M/IL4I1/IL1R1/IL7R/CD81/TNFSF4/HLA-E/BCL6	10
GO:0002763	positive regulation of myeloid leukocyte differentiation	6/276	58/18723	0.000206838	0.0099959	0.00864086	IL23R/ZFP36L1/CD74/TYROBP/ID2/PRKCA	6
GO:0001910	regulation of leukocyte mediated cytotoxicity	7/276	82/18723	0.000207605	0.0099959	0.00864086	IL23R/B2M/TYROBP/IL7R/SLAMF6/HLA-E/STAP1	7

## Sheet: ILC3_c4
ID	Description	GeneRatio	BgRatio	pvalue	p.adjust	qvalue	geneID	Count
GO:0002181	cytoplasmic translation	28/371	148/18723	1.08608e-19	4.28351e-16	3.38858e-16	RPL27A/RPS10/RPS11/RPL23/RPL4/RPL27/RPL31/RPL13A/RPL3/RPS29/EIF4B/RPS6/RPS16/RPS20/RPL23A/RPL38/RPL37A/RPLP2/RPL15/RPL10A/UBA52/RPS19/RPS2/RPS9/RPL35/RPL37/EEF2/RPL7	28
GO:0042110	T cell activation	37/371	487/18723	2.67603e-12	5.27713e-09	4.1746e-09	RIPOR2/TCF7/FCER1G/KLRC1/CD7/CD300A/TCIRG1/ITGAL/SYK/NLRC3/RUNX3/RPS6/GPR183/CCND3/ZMIZ1/PREX1/RUNX2/HLA-E/SPN/CD81/BTN3A1/RAC2/STAT6/CASP8/FOXP1/CARD11/CD47/CORO1A/MSN/PIK3CD/SOX4/RASAL3/NCKAP1L/CCDC88B/PTPN6/IL2RA/JAK3	37
GO:0002366	leukocyte activation involved in immune response	27/371	275/18723	8.38895e-12	1.10287e-08	8.72451e-09	ITGAM/TYROBP/FCER1G/FGR/PRAM1/SH2D1B/CD300A/ITGAL/SYK/ITGB2/RPS6/GPR183/HLA-F/SPN/PTK2B/VAMP2/CD81/RAC2/PLCL2/STAT6/FOXP1/CORO1A/MFNG/PIK3CD/NCKAP1L/KMT5B/JAK3	27
GO:0002263	cell activation involved in immune response	27/371	279/18723	1.17556e-11	1.1591e-08	9.16933e-09	ITGAM/TYROBP/FCER1G/FGR/PRAM1/SH2D1B/CD300A/ITGAL/SYK/ITGB2/RPS6/GPR183/HLA-F/SPN/PTK2B/VAMP2/CD81/RAC2/PLCL2/STAT6/FOXP1/CORO1A/MFNG/PIK3CD/NCKAP1L/KMT5B/JAK3	27
GO:0007229	integrin-mediated signaling pathway	17/371	107/18723	3.56088e-11	2.80883e-08	2.22199e-08	ITGAX/ITGAM/TSPAN32/FYB1/FGR/PRAM1/TXK/ITGAL/SYK/ITGB2/ITGA5/PTK2B/CD63/ZYX/CD47/TLN1/FERMT3	17
GO:0002703	regulation of leukocyte mediated immunity	23/371	226/18723	1.49355e-10	9.81758e-08	7.76644e-08	ITGAM/KLRD1/TYROBP/FGR/CD226/PRAM1/KLRC1/SH2D1B/CD300A/SYK/ITGB2/HLA-F/HLA-E/CD81/RAC2/NCR1/STAT6/ARRB2/MAVS/NCKAP1L/PTPN6/KMT5B/JAK3	23
GO:0002443	leukocyte mediated immunity	32/371	440/18723	2.63675e-10	1.48562e-07	1.17523e-07	ITGAM/KLRD1/TYROBP/FCER1G/PRF1/TRDC/FGR/CD226/PRAM1/KLRC1/SH2D1B/CD300A/TCIRG1/BTN3A2/SYK/ITGB2/HLA-F/HLA-E/VAMP2/CD81/RAC2/NCR1/STAT6/ARRB2/INPP5D/MAVS/CORO1A/PIK3CD/NCKAP1L/PTPN6/KMT5B/JAK3	32
GO:0030098	lymphocyte differentiation	29/371	374/18723	4.27125e-10	2.10573e-07	1.66579e-07	TCF7/FCER1G/IKZF1/KLRC1/TCIRG1/SYK/ATM/RUNX3/RPS6/GPR183/ZBTB7A/ZMIZ1/PREX1/RUNX2/SPN/PTK2B/PLCL2/STAT6/FOXP1/CARD11/ID2/INPP5D/MFNG/PIK3CD/SOX4/NCKAP1L/PTPN6/IL2RA/JAK3	29
GO:0002768	immune response-regulating cell surface receptor signaling pathway	26/371	315/18723	9.37599e-10	4.10877e-07	3.25034e-07	KLRD1/TYROBP/FCER1G/FYB1/TRDC/FGR/CD226/PRAM1/KLRC1/TXK/CD300A/BTN3A2/SYK/PRKCB/MAP3K1/DGKZ/CD81/BTN3A1/PLCL2/FOXP1/CARD11/CD47/INPP5D/PIK3CD/NCKAP1L/PTPN6	26
GO:0007159	leukocyte cell-cell adhesion	28/371	371/18723	1.58718e-09	6.25985e-07	4.95201e-07	SELL/RIPOR2/CD300A/ITGAL/SYK/ITGB2/RUNX3/ZMIZ1/HLA-E/SELPLG/SPN/SEMA4D/PECAM1/CD81/RAC2/CARD11/CD47/CORO1A/MSN/ETS1/SOX4/RASAL3/NCKAP1L/CCDC88B/FERMT3/PTPN6/IL2RA/JAK3	28
GO:0002683	negative regulation of immune system process	30/371	434/18723	3.22349e-09	1.15577e-06	9.14299e-07	RIPOR2/KLRD1/TYROBP/TSPAN32/FGR/KLRC1/CD300A/SYK/ATM/NLRC3/RUNX3/SAMHD1/HLA-F/HLA-E/SPN/DGKZ/UBASH3B/PLCL2/STAT6/ARRB2/ID2/CD47/INPP5D/RPS19/RIN3/NCKAP1L/TBC1D10C/PTPN6/IL2RA/JAK3	30
GO:0002429	immune response-activating cell surface receptor signaling pathway	24/371	291/18723	4.28603e-09	1.30031e-06	1.02865e-06	KLRD1/TYROBP/FCER1G/FYB1/TRDC/FGR/CD226/PRAM1/TXK/CD300A/BTN3A2/SYK/PRKCB/DGKZ/CD81/BTN3A1/PLCL2/FOXP1/CARD11/CD47/INPP5D/PIK3CD/NCKAP1L/PTPN6	24
GO:0002757	immune response-activating signal transduction	24/371	291/18723	4.28603e-09	1.30031e-06	1.02865e-06	KLRD1/TYROBP/FCER1G/FYB1/TRDC/FGR/CD226/PRAM1/TXK/CD300A/BTN3A2/SYK/PRKCB/DGKZ/CD81/BTN3A1/PLCL2/FOXP1/CARD11/CD47/INPP5D/PIK3CD/NCKAP1L/PTPN6	24
GO:1903131	mononuclear cell differentiation	29/371	426/18723	8.38881e-09	2.36325e-06	1.86951e-06	TCF7/FCER1G/IKZF1/KLRC1/TCIRG1/SYK/ATM/RUNX3/RPS6/GPR183/ZBTB7A/ZMIZ1/PREX1/RUNX2/SPN/PTK2B/PLCL2/STAT6/FOXP1/CARD11/ID2/INPP5D/MFNG/PIK3CD/SOX4/NCKAP1L/PTPN6/IL2RA/JAK3	29
GO:0042113	B cell activation	25/371	334/18723	1.44193e-08	3.79133e-06	2.99922e-06	TYROBP/TRDC/CD300A/TCIRG1/SYK/ATM/GPR183/ZBTB7A/PRKCB/PTK2B/CD81/PLCL2/STAT6/CASP8/CARD11/ID2/INPP5D/SKAP2/MFNG/PIK3CD/NCKAP1L/TBC1D10C/PTPN6/KMT5B/JAK3	25
GO:0046651	lymphocyte proliferation	23/371	288/18723	1.66346e-08	3.792e-06	2.99976e-06	TYROBP/CD300A/SYK/ATM/RPS6/GPR183/CCND3/HLA-E/SPN/CD81/BTN3A1/RAC2/PLCL2/CARD11/INPP5D/CORO1A/MSN/RASAL3/NCKAP1L/CCDC88B/PTPN6/IL2RA/JAK3	23
GO:0002764	immune response-regulating signaling pathway	30/371	468/18723	1.81149e-08	3.792e-06	2.99976e-06	KLRD1/TYROBP/FCER1G/FYB1/TRDC/FGR/CD226/PRAM1/KLRC1/UNC93B1/TXK/CD300A/BTN3A2/SYK/PRKCB/MAP3K1/DGKZ/RPS6KA3/CD81/FLOT1/BTN3A1/PLCL2/ARRB2/FOXP1/CARD11/CD47/INPP5D/PIK3CD/NCKAP1L/PTPN6	30
GO:0007015	actin filament organization	29/371	442/18723	1.89872e-08	3.792e-06	2.99976e-06	ADD3/MYO1F/EVL/CFL1/PXN/ARHGAP25/PFN1/SPTBN1/ARAP1/PREX1/RFLNB/CLASP1/PTK2B/TMSB4X/TMSB10/RAC2/ZYX/IQGAP2/TTN/ARPC5/GMFG/CD47/ARPC4/DBNL/CORO1A/WASF2/NCKAP1L/ACTR2/PLEC	29
GO:0043299	leukocyte degranulation	12/371	73/18723	1.90296e-08	3.792e-06	2.99976e-06	ITGAM/FGR/PRAM1/CD300A/SYK/ITGB2/HLA-F/VAMP2/RAC2/CORO1A/PIK3CD/NCKAP1L	12
GO:0002697	regulation of immune effector process	25/371	339/18723	1.93699e-08	3.792e-06	2.99976e-06	ITGAM/KLRD1/TYROBP/FGR/CD226/PRAM1/KLRC1/SH2D1B/CD300A/SYK/ITGB2/HLA-F/HLA-E/CD81/RAC2/NCR1/STAT6/ARRB2/CD47/MAVS/RPS19/NCKAP1L/PTPN6/KMT5B/JAK3	25
GO:0032943	mononuclear cell proliferation	23/371	291/18723	2.01907e-08	3.792e-06	2.99976e-06	TYROBP/CD300A/SYK/ATM/RPS6/GPR183/CCND3/HLA-E/SPN/CD81/BTN3A1/RAC2/PLCL2/CARD11/INPP5D/CORO1A/MSN/RASAL3/NCKAP1L/CCDC88B/PTPN6/IL2RA/JAK3	23
GO:0070661	leukocyte proliferation	24/371	318/18723	2.41033e-08	4.32106e-06	3.41828e-06	TYROBP/CD300A/TCIRG1/SYK/ATM/RPS6/GPR183/CCND3/HLA-E/SPN/CD81/BTN3A1/RAC2/PLCL2/CARD11/INPP5D/CORO1A/MSN/RASAL3/NCKAP1L/CCDC88B/PTPN6/IL2RA/JAK3	24
GO:0043254	regulation of protein-containing complex assembly	28/371	428/18723	3.58058e-08	6.13991e-06	4.85713e-06	TMC8/ADD3/EVL/SORL1/PFN1/SYK/SPTBN1/ATM/RPL13A/NLRC3/PREX1/CRBN/CLASP1/PTK2B/TMSB4X/TMSB10/CARD8/IQGAP2/ARPC5/GMFG/RACK1/ARPC4/DBNL/CORO1A/MSN/WASF2/NCKAP1L/ACTR2	28
GO:0002831	regulation of response to biotic stimulus	24/371	327/18723	4.10496e-08	6.74582e-06	5.33645e-06	KLRD1/TYROBP/TSPAN32/FGR/CD226/KLRC1/SIGIRR/TXK/SH2D1B/SYK/NLRC3/SAMHD1/HLA-F/HLA-E/CARD8/NCR1/CASP8/ARRB2/FOXP1/MAVS/RPS19/TRIM44/APOBEC3G/PTPN6	24
GO:0030099	myeloid cell differentiation	26/371	381/18723	4.83526e-08	7.6281e-06	6.0344e-06	KLF2/TYROBP/IKZF1/PIP4K2A/KLF13/TCIRG1/RPS6/GPR183/ZBTB7A/PTK2B/FLI1/CD81/UBASH3B/CASP8/FOXP1/ID2/INPP5D/RPS19/WASF2/NBEAL2/PIK3CD/ETS1/NCKAP1L/IREB2/PTPN6/JAK3	26
GO:0032535	regulation of cellular component size	26/371	383/18723	5.36888e-08	8.14418e-06	6.44265e-06	ADD3/EVL/TMEM123/PFN1/SPTBN1/PREX1/PTK2B/SLC9A3R1/TMSB4X/SEMA4D/TMSB10/IQGAP2/ARPC5/PTEN/GMFG/ARPC4/DBNL/CORO1A/MSN/WASF2/RIN3/NCKAP1L/DNM2/ACTR2/ARHGAP4/MACF1	26
GO:0030833	regulation of actin filament polymerization	17/371	172/18723	5.96474e-08	8.71293e-06	6.89258e-06	ADD3/EVL/PFN1/SPTBN1/PREX1/PTK2B/TMSB4X/TMSB10/IQGAP2/ARPC5/GMFG/ARPC4/DBNL/CORO1A/WASF2/NCKAP1L/ACTR2	17
GO:0050900	leukocyte migration	25/371	369/18723	1.01236e-07	1.42599e-05	1.12806e-05	SELL/RIPOR2/FCER1G/CD300A/ITGAL/SYK/ITGB2/GPR183/PREX1/SELPLG/SPN/PTK2B/PPIA/PECAM1/CD81/RAC2/CD47/CORO1A/RPS19/MSN/PIK3CD/RIN3/NCKAP1L/IL16/PLEC	25
GO:0045069	regulation of viral genome replication	12/371	85/18723	1.09999e-07	1.49599e-05	1.18344e-05	IFITM3/IFITM2/PABPC1/PPIA/APOBEC3C/LARP1/TOP2B/NOTCH1/MAVS/FAM111A/TRIM28/APOBEC3G	12
GO:0002886	regulation of myeloid leukocyte mediated immunity	10/371	56/18723	1.30862e-07	1.69201e-05	1.33851e-05	ITGAM/TYROBP/FGR/PRAM1/CD300A/SYK/ITGB2/HLA-E/RAC2/MAVS	10
GO:0036230	granulocyte activation	9/371	43/18723	1.32993e-07	1.69201e-05	1.33851e-05	ITGAM/TYROBP/FCER1G/PRAM1/CD300A/SYK/ITGB2/PREX1/VAMP2	9
GO:0002253	activation of immune response	25/371	375/18723	1.37822e-07	1.69866e-05	1.34377e-05	KLRD1/TYROBP/FCER1G/FYB1/TRDC/FGR/CD226/PRAM1/TXK/CD300A/BTN3A2/SYK/PRKCB/DGKZ/CD81/BTN3A1/PLCL2/FOXP1/CARD11/CD47/INPP5D/MAVS/PIK3CD/NCKAP1L/PTPN6	25
GO:0110053	regulation of actin filament organization	21/371	278/18723	1.81007e-07	2.16331e-05	1.71134e-05	ADD3/EVL/PXN/PFN1/SPTBN1/ARAP1/PREX1/CLASP1/PTK2B/TMSB4X/TMSB10/IQGAP2/ARPC5/GMFG/CD47/ARPC4/DBNL/CORO1A/WASF2/NCKAP1L/ACTR2	21
GO:0002696	positive regulation of leukocyte activation	26/371	409/18723	1.95948e-07	2.273e-05	1.79811e-05	ITGAM/TYROBP/TRDC/FGR/CD226/SYK/ITGB2/RUNX3/GPR183/HLA-F/ZMIZ1/HLA-E/CD81/STAT6/CARD11/CD47/INPP5D/CORO1A/SOX4/RASAL3/NCKAP1L/CCDC88B/PTPN6/IL2RA/KMT5B/JAK3	26
GO:0008064	regulation of actin polymerization or depolymerization	17/371	188/18723	2.17994e-07	2.41862e-05	1.91331e-05	ADD3/EVL/PFN1/SPTBN1/PREX1/PTK2B/TMSB4X/TMSB10/IQGAP2/ARPC5/GMFG/ARPC4/DBNL/CORO1A/WASF2/NCKAP1L/ACTR2	17
GO:0030217	T cell differentiation	20/371	257/18723	2.20767e-07	2.41862e-05	1.91331e-05	TCF7/FCER1G/KLRC1/TCIRG1/SYK/RUNX3/RPS6/GPR183/ZMIZ1/PREX1/RUNX2/SPN/STAT6/FOXP1/CARD11/PIK3CD/SOX4/NCKAP1L/IL2RA/JAK3	20
GO:0030832	regulation of actin filament length	17/371	189/18723	2.35271e-07	2.50786e-05	1.98391e-05	ADD3/EVL/PFN1/SPTBN1/PREX1/PTK2B/TMSB4X/TMSB10/IQGAP2/ARPC5/GMFG/ARPC4/DBNL/CORO1A/WASF2/NCKAP1L/ACTR2	17
GO:0043300	regulation of leukocyte degranulation	9/371	46/18723	2.46553e-07	2.55896e-05	2.02433e-05	ITGAM/FGR/PRAM1/CD300A/SYK/ITGB2/HLA-F/RAC2/NCKAP1L	9
GO:0022604	regulation of cell morphogenesis	22/371	309/18723	2.57527e-07	2.60433e-05	2.06022e-05	FGR/CFL1/ITGB2/MARK2/FGD3/ARAP1/PREX1/ACTN4/PTK2B/SLC9A3R1/SEMA4D/RAC2/ARHGAP15/DBNL/CORO1A/MSN/ATP10A/EPB41/DNM2/ACTR2/CUX1/MACF1	22
GO:0030041	actin filament polymerization	17/371	191/18723	2.73615e-07	2.69785e-05	2.1342e-05	ADD3/EVL/PFN1/SPTBN1/PREX1/PTK2B/TMSB4X/TMSB10/IQGAP2/ARPC5/GMFG/ARPC4/DBNL/CORO1A/WASF2/NCKAP1L/ACTR2	17
GO:0050867	positive regulation of cell activation	26/371	420/18723	3.27326e-07	3.132e-05	2.47765e-05	ITGAM/TYROBP/TRDC/FGR/CD226/SYK/ITGB2/RUNX3/GPR183/HLA-F/ZMIZ1/HLA-E/CD81/STAT6/CARD11/CD47/INPP5D/CORO1A/SOX4/RASAL3/NCKAP1L/CCDC88B/PTPN6/IL2RA/KMT5B/JAK3	26
GO:0019079	viral genome replication	14/371	131/18723	3.38816e-07	3.132e-05	2.47765e-05	IFITM3/IFITM2/PABPC1/CTBP1/PPIA/APOBEC3C/LARP1/TOP2B/NOTCH1/MAVS/FAM111A/NUCKS1/TRIM28/APOBEC3G	14
GO:0050851	antigen receptor-mediated signaling pathway	19/371	240/18723	3.4147e-07	3.132e-05	2.47765e-05	FYB1/TRDC/CD226/PRAM1/TXK/CD300A/BTN3A2/SYK/PRKCB/DGKZ/CD81/BTN3A1/PLCL2/FOXP1/CARD11/INPP5D/PIK3CD/NCKAP1L/PTPN6	19
GO:0008154	actin polymerization or depolymerization	18/371	218/18723	3.75145e-07	3.28794e-05	2.60101e-05	ADD3/EVL/CFL1/PFN1/SPTBN1/PREX1/PTK2B/TMSB4X/TMSB10/IQGAP2/ARPC5/GMFG/ARPC4/DBNL/CORO1A/WASF2/NCKAP1L/ACTR2	18
GO:0045088	regulation of innate immune response	18/371	218/18723	3.75145e-07	3.28794e-05	2.60101e-05	KLRD1/TYROBP/FGR/CD226/KLRC1/TXK/SH2D1B/SYK/NLRC3/SAMHD1/HLA-F/HLA-E/NCR1/CASP8/ARRB2/MAVS/RPS19/PTPN6	18
GO:0042119	neutrophil activation	8/371	36/18723	4.10712e-07	3.52141e-05	2.7857e-05	ITGAM/TYROBP/FCER1G/PRAM1/CD300A/SYK/ITGB2/PREX1	8
GO:0042098	T cell proliferation	17/371	199/18723	4.90667e-07	4.11743e-05	3.25719e-05	SYK/RPS6/CCND3/HLA-E/SPN/CD81/BTN3A1/RAC2/CARD11/CORO1A/MSN/RASAL3/NCKAP1L/CCDC88B/PTPN6/IL2RA/JAK3	17
GO:0048872	homeostasis of number of cells	20/371	272/18723	5.46776e-07	4.49268e-05	3.55404e-05	KLF2/IKZF1/KLF13/TCIRG1/RPS6/GPR183/ZBTB7A/CARD11/ID2/NOTCH1/INPP5D/CORO1A/RPS19/PIK3CD/ETS1/SOX4/NCKAP1L/IREB2/IL2RA/JAK3	20
GO:0051250	negative regulation of lymphocyte activation	15/371	157/18723	5.58697e-07	4.49694e-05	3.55742e-05	RIPOR2/TYROBP/FGR/CD300A/ATM/RUNX3/HLA-F/SPN/ID2/INPP5D/NCKAP1L/TBC1D10C/PTPN6/IL2RA/JAK3	15
GO:0050670	regulation of lymphocyte proliferation	18/371	225/18723	5.97807e-07	4.57062e-05	3.6157e-05	TYROBP/CD300A/SYK/ATM/GPR183/HLA-E/SPN/CD81/RAC2/CARD11/INPP5D/CORO1A/RASAL3/NCKAP1L/CCDC88B/PTPN6/IL2RA/JAK3	18
GO:0002444	myeloid leukocyte mediated immunity	12/371	99/18723	6.02617e-07	4.57062e-05	3.6157e-05	ITGAM/TYROBP/FGR/PRAM1/CD300A/SYK/ITGB2/HLA-E/VAMP2/RAC2/MAVS/PIK3CD	12
GO:0031341	regulation of cell killing	12/371	99/18723	6.02617e-07	4.57062e-05	3.6157e-05	ITGAM/KLRD1/TYROBP/PRF1/CD226/KLRC1/SYK/HLA-F/HLA-E/NCR1/ARRB2/NCKAP1L	12
GO:0032944	regulation of mononuclear cell proliferation	18/371	227/18723	6.80538e-07	5.06423e-05	4.00619e-05	TYROBP/CD300A/SYK/ATM/GPR183/HLA-E/SPN/CD81/RAC2/CARD11/INPP5D/CORO1A/RASAL3/NCKAP1L/CCDC88B/PTPN6/IL2RA/JAK3	18
GO:0051056	regulation of small GTPase mediated signal transduction	21/371	302/18723	7.11575e-07	5.19713e-05	4.11132e-05	RIPOR2/ARHGEF1/ARHGAP25/OGT/FGD3/ARAP1/PREX1/RASA3/SRGAP3/DENND4B/FLOT1/RGL2/ARHGDIB/SIPA1/ARHGAP15/NOTCH1/TSC2/RASAL3/DNM2/ARHGAP4/MYO9B	21
GO:0030183	B cell differentiation	14/371	141/18723	8.36623e-07	5.90856e-05	4.67411e-05	TCIRG1/SYK/ATM/GPR183/ZBTB7A/PTK2B/PLCL2/CARD11/ID2/INPP5D/MFNG/NCKAP1L/PTPN6/JAK3	14
GO:0032956	regulation of actin cytoskeleton organization	23/371	358/18723	8.38943e-07	5.90856e-05	4.67411e-05	ADD3/EVL/PXN/PFN1/SPTBN1/ARAP1/PREX1/CLASP1/PTK2B/TMSB4X/TMSB10/RAC2/IQGAP2/ARPC5/ARHGDIB/GMFG/CD47/ARPC4/DBNL/CORO1A/WASF2/NCKAP1L/ACTR2	23
GO:0002283	neutrophil activation involved in immune response	6/371	18/18723	8.82405e-07	6.10562e-05	4.83001e-05	ITGAM/TYROBP/FCER1G/PRAM1/SYK/ITGB2	6
GO:0006909	phagocytosis	21/371	308/18723	9.79027e-07	6.63935e-05	5.25222e-05	ITGAM/TYROBP/FCER1G/TRDC/FGR/ARHGAP25/CD300A/ITGAL/SYK/ITGB2/BIN2/IL2RB/SPG11/PECAM1/RAC2/PTEN/RACK1/CD47/CORO1A/NCKAP1L/DNM2	21
GO:0032271	regulation of protein polymerization	18/371	233/18723	9.95047e-07	6.63935e-05	5.25222e-05	ADD3/EVL/PFN1/SPTBN1/PREX1/CLASP1/PTK2B/TMSB4X/TMSB10/IQGAP2/ARPC5/GMFG/ARPC4/DBNL/CORO1A/WASF2/NCKAP1L/ACTR2	18
GO:0050852	T cell receptor signaling pathway	13/371	123/18723	1.01316e-06	6.63935e-05	5.25222e-05	FYB1/CD226/PRAM1/TXK/CD300A/BTN3A2/DGKZ/CD81/BTN3A1/CARD11/INPP5D/PIK3CD/PTPN6	13
GO:0002695	negative regulation of leukocyte activation	16/371	187/18723	1.04326e-06	6.63935e-05	5.25222e-05	RIPOR2/TYROBP/TSPAN32/FGR/CD300A/ATM/RUNX3/HLA-F/SPN/ID2/INPP5D/NCKAP1L/TBC1D10C/PTPN6/IL2RA/JAK3	16
GO:0050866	negative regulation of cell activation	17/371	210/18723	1.04371e-06	6.63935e-05	5.25222e-05	RIPOR2/TYROBP/TSPAN32/FGR/CD300A/ATM/RUNX3/HLA-F/SPN/UBASH3B/ID2/INPP5D/NCKAP1L/TBC1D10C/PTPN6/IL2RA/JAK3	17
GO:0022407	regulation of cell-cell adhesion	26/371	448/18723	1.11169e-06	6.796e-05	5.37615e-05	RIPOR2/CD300A/SYK/ITGB2/RUNX3/ZMIZ1/HLA-E/SPN/FXYD5/AKNA/CD81/FLOT1/UBASH3B/CARD11/CD47/NOTCH1/CORO1A/ETS1/SOX4/RASAL3/NCKAP1L/CCDC88B/FERMT3/PTPN6/IL2RA/JAK3	26
GO:0001909	leukocyte mediated cytotoxicity	13/371	124/18723	1.11183e-06	6.796e-05	5.37615e-05	ITGAM/KLRD1/TYROBP/PRF1/CD226/KLRC1/HLA-F/HLA-E/NCR1/ARRB2/CORO1A/NCKAP1L/PTPN6	13
GO:0001906	cell killing	16/371	188/18723	1.12003e-06	6.796e-05	5.37615e-05	ITGAM/KLRD1/TYROBP/GNLY/PRF1/CD226/KLRC1/SYK/HLA-F/HLA-E/NCR1/ARRB2/CORO1A/RPS19/NCKAP1L/PTPN6	16
GO:0002228	natural killer cell mediated immunity	10/371	71/18723	1.30346e-06	7.6729e-05	6.06984e-05	KLRD1/CD226/KLRC1/SH2D1B/HLA-F/HLA-E/NCR1/ARRB2/CORO1A/PTPN6	10
GO:0061515	myeloid cell development	10/371	71/18723	1.30346e-06	7.6729e-05	6.06984e-05	KLF2/TYROBP/PIP4K2A/RPS6/ZBTB7A/FLI1/FOXP1/WASF2/NCKAP1L/PTPN6	10
GO:0002285	lymphocyte activation involved in immune response	16/371	194/18723	1.69766e-06	9.70371e-05	7.67636e-05	FCER1G/ITGAL/RPS6/GPR183/HLA-F/SPN/PTK2B/CD81/PLCL2/STAT6/FOXP1/CORO1A/MFNG/NCKAP1L/KMT5B/JAK3	16
GO:0050777	negative regulation of immune response	16/371	194/18723	1.69766e-06	9.70371e-05	7.67636e-05	KLRD1/FGR/KLRC1/CD300A/SYK/NLRC3/SAMHD1/HLA-F/HLA-E/STAT6/ARRB2/INPP5D/RPS19/NCKAP1L/PTPN6/JAK3	16
GO:0002275	myeloid cell activation involved in immune response	11/371	91/18723	1.82918e-06	0.000103061	8.15292e-05	ITGAM/TYROBP/FCER1G/FGR/PRAM1/CD300A/SYK/ITGB2/VAMP2/RAC2/PIK3CD	11
GO:0006898	receptor-mediated endocytosis	18/371	244/18723	1.93208e-06	0.000107325	8.49025e-05	ITGAM/FCER1G/ABCA2/SORL1/SYK/ITGB2/CAP1/TNK2/CD63/CD81/FLOT1/ANKRD13D/ARRB2/AAK1/DBNL/RIN3/EPS15/DNM2	18
GO:0070663	regulation of leukocyte proliferation	18/371	245/18723	2.0481e-06	0.000112191	8.87512e-05	TYROBP/CD300A/SYK/ATM/GPR183/HLA-E/SPN/CD81/RAC2/CARD11/INPP5D/CORO1A/RASAL3/NCKAP1L/CCDC88B/PTPN6/IL2RA/JAK3	18
GO:1902563	regulation of neutrophil activation	5/371	12/18723	2.10047e-06	0.000113483	8.97735e-05	ITGAM/PRAM1/CD300A/SYK/ITGB2	5
GO:0008360	regulation of cell shape	14/371	154/18723	2.41609e-06	0.000128771	0.000101868	FGR/ITGB2/MARK2/FGD3/ARAP1/PTK2B/SLC9A3R1/SEMA4D/RAC2/ARHGAP15/CORO1A/MSN/ATP10A/EPB41	14
GO:1903305	regulation of regulated secretory pathway	13/371	136/18723	3.16617e-06	0.000166499	0.000131713	ITGAM/FGR/PRAM1/CD300A/SYK/ITGB2/HLA-F/PRKCB/CALM1/GNAI2/RAC2/NOTCH1/NCKAP1L	13
GO:0042492	gamma-delta T cell differentiation	5/371	13/18723	3.35782e-06	0.000174253	0.000137847	TCF7/KLRC1/SYK/SOX4/NCKAP1L	5
GO:0051251	positive regulation of lymphocyte activation	22/371	362/18723	3.61089e-06	0.000184953	0.000146311	TYROBP/TRDC/SYK/RUNX3/GPR183/HLA-F/ZMIZ1/HLA-E/CD81/STAT6/CARD11/CD47/INPP5D/CORO1A/SOX4/RASAL3/NCKAP1L/CCDC88B/PTPN6/IL2RA/KMT5B/JAK3	22
GO:0002704	negative regulation of leukocyte mediated immunity	9/371	63/18723	3.93703e-06	0.000196552	0.000155488	KLRD1/KLRC1/CD300A/HLA-F/HLA-E/ARRB2/NCKAP1L/PTPN6/JAK3	9
GO:0050854	regulation of antigen receptor-mediated signaling pathway	9/371	63/18723	3.93703e-06	0.000196552	0.000155488	CD226/CD300A/PRKCB/DGKZ/CD81/PLCL2/FOXP1/CARD11/PTPN6	9
GO:0007265	Ras protein signal transduction	21/371	337/18723	4.08252e-06	0.000200195	0.000158369	RIPOR2/CFL1/ARHGEF1/OGT/RASGRP2/RASA3/DENND4B/RASSF1/FLOT1/RAC2/RGL2/ARHGDIB/NOTCH1/DBNL/WASF2/RASAL3/DNM2/ARHGAP4/MYO9B/TRIM28/KPNB1	21
GO:0060326	cell chemotaxis	20/371	310/18723	4.12236e-06	0.000200195	0.000158369	RIPOR2/FCER1G/SYK/ITGB2/GPR183/BIN2/PREX1/PTK2B/TMSB4X/PPIA/RAC2/ARRB2/NOTCH1/CORO1A/RPS19/PIK3CD/RIN3/NCKAP1L/IL16/PLEC	20
GO:0002715	regulation of natural killer cell mediated immunity	8/371	48/18723	4.16227e-06	0.000200195	0.000158369	KLRD1/CD226/KLRC1/SH2D1B/HLA-F/HLA-E/NCR1/ARRB2	8
GO:0030838	positive regulation of actin filament polymerization	11/371	99/18723	4.2302e-06	0.000201011	0.000159015	EVL/PFN1/PTK2B/IQGAP2/ARPC5/GMFG/ARPC4/CORO1A/WASF2/NCKAP1L/ACTR2	11
GO:0032970	regulation of actin filament-based process	23/371	397/18723	4.81128e-06	0.000224893	0.000177907	ADD3/EVL/PXN/PFN1/SPTBN1/ARAP1/PREX1/CLASP1/PTK2B/TMSB4X/TMSB10/RAC2/IQGAP2/ARPC5/ARHGDIB/GMFG/CD47/ARPC4/DBNL/CORO1A/WASF2/NCKAP1L/ACTR2	23
GO:0002699	positive regulation of immune effector process	17/371	235/18723	4.84683e-06	0.000224893	0.000177907	ITGAM/KLRD1/TYROBP/FGR/CD226/SH2D1B/CD300A/SYK/ITGB2/HLA-F/HLA-E/CD81/RAC2/STAT6/MAVS/RPS19/KMT5B	17
GO:0001910	regulation of leukocyte mediated cytotoxicity	10/371	82/18723	4.97835e-06	0.00022831	0.00018061	ITGAM/KLRD1/TYROBP/CD226/KLRC1/HLA-F/HLA-E/NCR1/ARRB2/NCKAP1L	10
GO:0031334	positive regulation of protein-containing complex assembly	17/371	237/18723	5.4282e-06	0.000246079	0.000194667	EVL/PFN1/SYK/ATM/CRBN/CLASP1/PTK2B/IQGAP2/ARPC5/GMFG/RACK1/ARPC4/CORO1A/MSN/WASF2/NCKAP1L/ACTR2	17
GO:0001911	negative regulation of leukocyte mediated cytotoxicity	6/371	24/18723	5.78506e-06	0.00025854	0.000204525	KLRD1/KLRC1/HLA-F/HLA-E/ARRB2/NCKAP1L	6
GO:0043112	receptor metabolic process	14/371	166/18723	5.83419e-06	0.00025854	0.000204525	FCER1G/ABCA2/SORL1/SYK/ITGB2/ARAP1/CD63/CD81/FLOT1/ANKRD13D/ARRB2/RIN3/EPS15/DNM2	14
GO:1903039	positive regulation of leukocyte cell-cell adhesion	17/371	239/18723	6.07143e-06	0.000265482	0.000210016	SYK/ITGB2/RUNX3/ZMIZ1/HLA-E/CD81/CARD11/CD47/CORO1A/ETS1/SOX4/RASAL3/NCKAP1L/CCDC88B/PTPN6/IL2RA/JAK3	17
GO:0030168	platelet activation	12/371	123/18723	6.12546e-06	0.000265482	0.000210016	TSPAN32/FCER1G/TXK/SYK/DGKZ/PPIA/UBASH3B/ACTB/GNAS/TLN1/FERMT3/PTPN6	12
GO:0070527	platelet aggregation	9/371	67/18723	6.63385e-06	0.00028439	0.000224974	TSPAN32/SYK/PPIA/UBASH3B/ACTB/GNAS/TLN1/FERMT3/PTPN6	9
GO:0001819	positive regulation of cytokine production	25/371	467/18723	7.43281e-06	0.000315215	0.000249359	TYROBP/FCER1G/FGR/CD226/TXK/SORL1/TRIM56/BTN3A2/SYK/SPTBN1/HLA-F/HLA-E/SPN/CD81/FLOT1/BTN3A1/NLRP1/CARD8/CASP8/FOXP1/CARD11/MAVS/PIK3CD/IL16/CCDC88B	25
GO:0042267	natural killer cell mediated cytotoxicity	9/371	68/18723	7.51381e-06	0.00031526	0.000249395	KLRD1/CD226/KLRC1/HLA-F/HLA-E/NCR1/ARRB2/CORO1A/PTPN6	9
GO:0045010	actin nucleation	8/371	52/18723	7.74707e-06	0.000321626	0.00025443	EVL/IQGAP2/ARPC5/GMFG/ARPC4/CORO1A/WASF2/ACTR2	8
GO:0051258	protein polymerization	19/371	297/18723	8.0951e-06	0.000332574	0.000263091	ADD3/EVL/PFN1/SPTBN1/PREX1/CLASP1/PTK2B/TMSB4X/TMSB10/IQGAP2/ARPC5/GMFG/ARPC4/DBNL/CORO1A/WASF2/ZNF207/NCKAP1L/ACTR2	19
GO:0097529	myeloid leukocyte migration	16/371	220/18723	8.60554e-06	0.000349899	0.000276797	RIPOR2/FCER1G/CD300A/SYK/ITGB2/PREX1/PTK2B/PPIA/PECAM1/CD81/RAC2/CD47/RPS19/PIK3CD/RIN3/NCKAP1L	16
GO:0050863	regulation of T cell activation	20/371	329/18723	9.98171e-06	0.000397734	0.000314638	RIPOR2/TCF7/CD300A/SYK/RUNX3/ZMIZ1/HLA-E/SPN/CD81/RAC2/CARD11/CD47/CORO1A/SOX4/RASAL3/NCKAP1L/CCDC88B/PTPN6/IL2RA/JAK3	20
GO:0034101	erythrocyte homeostasis	12/371	129/18723	1.00169e-05	0.000397734	0.000314638	KLF2/IKZF1/KLF13/RPS6/ZBTB7A/ID2/INPP5D/RPS19/ETS1/NCKAP1L/IREB2/JAK3	12
GO:0050864	regulation of B cell activation	15/371	198/18723	1.00845e-05	0.000397734	0.000314638	TYROBP/TRDC/CD300A/SYK/ATM/GPR183/CD81/STAT6/CARD11/ID2/INPP5D/NCKAP1L/TBC1D10C/PTPN6/KMT5B	15
GO:0006968	cellular defense response	8/371	54/18723	1.0348e-05	0.000404085	0.000319662	TYROBP/GNLY/PRF1/TCIRG1/SPN/PTK2B/VEZF1/NCR1	8
GO:0002698	negative regulation of immune effector process	11/371	110/18723	1.17845e-05	0.000455667	0.000360467	KLRD1/KLRC1/CD300A/HLA-F/HLA-E/ARRB2/CD47/RPS19/NCKAP1L/PTPN6/JAK3	11
GO:0051098	regulation of binding	21/371	363/18723	1.27453e-05	0.000485951	0.000384424	RIPOR2/TMC8/HOPX/SORL1/MARK2/ZBTB7A/TMSB4X/CALM1/FLOT1/SP100/UBASH3B/TAF10/PLCL2/ARRB2/RACK1/ACTB/MFNG/EPB41/NUCKS1/SMAD2/TRIM28	21
GO:0017157	regulation of exocytosis	15/371	202/18723	1.28141e-05	0.000485951	0.000384424	ITGAM/FGR/PRAM1/CD300A/SYK/ITGB2/HLA-F/PRKCB/CLASP1/CALM1/VAMP2/GNAI2/RAC2/NOTCH1/NCKAP1L	15
GO:1903037	regulation of leukocyte cell-cell adhesion	20/371	336/18723	1.35756e-05	0.000509927	0.00040339	RIPOR2/CD300A/SYK/ITGB2/RUNX3/ZMIZ1/HLA-E/SPN/CD81/CARD11/CD47/CORO1A/ETS1/SOX4/RASAL3/NCKAP1L/CCDC88B/PTPN6/IL2RA/JAK3	20
GO:0046631	alpha-beta T cell activation	13/371	156/18723	1.42744e-05	0.000531114	0.000420151	CD300A/TCIRG1/SYK/RUNX3/GPR183/HLA-E/SPN/CD81/STAT6/FOXP1/RASAL3/NCKAP1L/JAK3	13
GO:0002705	positive regulation of leukocyte mediated immunity	12/371	134/18723	1.47663e-05	0.000538387	0.000425905	ITGAM/KLRD1/TYROBP/CD226/SH2D1B/ITGB2/HLA-F/HLA-E/CD81/STAT6/MAVS/KMT5B	12
GO:0030595	leukocyte chemotaxis	16/371	230/18723	1.50197e-05	0.000538387	0.000425905	RIPOR2/FCER1G/SYK/ITGB2/GPR183/PREX1/PTK2B/PPIA/RAC2/CORO1A/RPS19/PIK3CD/RIN3/NCKAP1L/IL16/PLEC	16
GO:0045055	regulated exocytosis	16/371	230/18723	1.50197e-05	0.000538387	0.000425905	ITGAM/FGR/PRAM1/CD300A/SYK/ITGB2/HLA-F/PRKCB/CALM1/VAMP2/GNAI2/RAC2/NOTCH1/CORO1A/PIK3CD/NCKAP1L	16
GO:0031342	negative regulation of cell killing	6/371	28/18723	1.51432e-05	0.000538387	0.000425905	KLRD1/KLRC1/HLA-F/HLA-E/ARRB2/NCKAP1L	6
GO:0031623	receptor internalization	11/371	113/18723	1.52422e-05	0.000538387	0.000425905	FCER1G/SYK/ITGB2/CD63/CD81/FLOT1/ANKRD13D/ARRB2/RIN3/EPS15/DNM2	11
GO:0002262	myeloid cell homeostasis	13/371	157/18723	1.52889e-05	0.000538387	0.000425905	KLF2/IKZF1/KLF13/RPS6/ZBTB7A/ID2/INPP5D/RPS19/PIK3CD/ETS1/NCKAP1L/IREB2/JAK3	13
GO:0022409	positive regulation of cell-cell adhesion	18/371	284/18723	1.58698e-05	0.0005539	0.000438176	SYK/ITGB2/RUNX3/ZMIZ1/HLA-E/CD81/FLOT1/CARD11/CD47/CORO1A/ETS1/SOX4/RASAL3/NCKAP1L/CCDC88B/PTPN6/IL2RA/JAK3	18
GO:0050764	regulation of phagocytosis	10/371	95/18723	1.8723e-05	0.000647751	0.00051242	FCER1G/FGR/CD300A/SYK/IL2RB/PTEN/RACK1/CD47/NCKAP1L/DNM2	10
GO:0032273	positive regulation of protein polymerization	12/371	138/18723	1.98787e-05	0.000681751	0.000539317	EVL/PFN1/CLASP1/PTK2B/IQGAP2/ARPC5/GMFG/ARPC4/CORO1A/WASF2/NCKAP1L/ACTR2	12
GO:0019058	viral life cycle	19/371	317/18723	2.02371e-05	0.000688062	0.000544309	IFITM3/IFITM2/NCAM1/PABPC1/ITGA5/SELPLG/CTBP1/PPIA/APOBEC3C/LARP1/CD81/TOP2B/NOTCH1/MAVS/FAM111A/EPS15/NUCKS1/TRIM28/APOBEC3G	19
GO:0045953	negative regulation of natural killer cell mediated cytotoxicity	5/371	18/18723	2.05987e-05	0.00069437	0.000549299	KLRD1/KLRC1/HLA-F/HLA-E/ARRB2	5
GO:0045785	positive regulation of cell adhesion	23/371	437/18723	2.25913e-05	0.000755085	0.000597329	SYK/ITGB2/ATM/RUNX3/ZMIZ1/PREX1/HLA-E/PTK2B/CD81/FLOT1/CARD11/CD47/CORO1A/ETS1/SOX4/RASAL3/NCKAP1L/UTRN/DNM2/CCDC88B/PTPN6/IL2RA/JAK3	23
GO:0045577	regulation of B cell differentiation	6/371	30/18723	2.30815e-05	0.00075914	0.000600537	SYK/CARD11/ID2/INPP5D/NCKAP1L/PTPN6	6
GO:0042269	regulation of natural killer cell mediated cytotoxicity	7/371	44/18723	2.30976e-05	0.00075914	0.000600537	KLRD1/CD226/KLRC1/HLA-F/HLA-E/NCR1/ARRB2	7
GO:0050792	regulation of viral process	13/371	164/18723	2.43423e-05	0.00079004	0.000624981	IFITM3/IFITM2/PABPC1/PPIA/APOBEC3C/LARP1/TOP2B/MDFIC/NOTCH1/MAVS/FAM111A/TRIM28/APOBEC3G	13
GO:0002449	lymphocyte mediated immunity	20/371	350/18723	2.44384e-05	0.00079004	0.000624981	KLRD1/FCER1G/PRF1/TRDC/CD226/KLRC1/SH2D1B/TCIRG1/BTN3A2/HLA-F/HLA-E/CD81/NCR1/STAT6/ARRB2/INPP5D/CORO1A/NCKAP1L/PTPN6/KMT5B	20
GO:0030218	erythrocyte differentiation	11/371	120/18723	2.69002e-05	0.000862556	0.000682346	KLF2/IKZF1/KLF13/RPS6/ZBTB7A/ID2/INPP5D/RPS19/ETS1/NCKAP1L/JAK3	11
GO:0002716	negative regulation of natural killer cell mediated immunity	5/371	19/18723	2.75025e-05	0.000867758	0.000686461	KLRD1/KLRC1/HLA-F/HLA-E/ARRB2	5
GO:0002888	positive regulation of myeloid leukocyte mediated immunity	5/371	19/18723	2.75025e-05	0.000867758	0.000686461	ITGAM/TYROBP/ITGB2/HLA-E/MAVS	5
GO:0050870	positive regulation of T cell activation	15/371	216/18723	2.82449e-05	0.00087845	0.00069492	SYK/RUNX3/ZMIZ1/HLA-E/CD81/CARD11/CD47/CORO1A/SOX4/RASAL3/NCKAP1L/CCDC88B/PTPN6/IL2RA/JAK3	15
GO:1902903	regulation of supramolecular fiber organization	21/371	383/18723	2.82868e-05	0.00087845	0.00069492	ADD3/EVL/PXN/PFN1/SPTBN1/ARAP1/PREX1/CLASP1/PTK2B/TMSB4X/TMSB10/IQGAP2/ARPC5/GMFG/CD47/ARPC4/DBNL/CORO1A/WASF2/NCKAP1L/ACTR2	21
GO:0002706	regulation of lymphocyte mediated immunity	13/371	168/18723	3.13867e-05	0.00096127	0.000760437	KLRD1/CD226/KLRC1/SH2D1B/HLA-F/HLA-E/CD81/NCR1/STAT6/ARRB2/NCKAP1L/PTPN6/KMT5B	13
GO:0007163	establishment or maintenance of cell polarity	15/371	218/18723	3.14411e-05	0.00096127	0.000760437	RIPOR2/TCIRG1/MARK2/CAP1/SPN/CLASP1/PTK2B/SLC9A3R1/RAC2/ARPC5/RACK1/ACTB/MSN/NCKAP1L/ACTR2	15
GO:0042102	positive regulation of T cell proliferation	10/371	101/18723	3.20484e-05	0.000972301	0.000769163	SYK/HLA-E/CD81/CARD11/CORO1A/RASAL3/NCKAP1L/CCDC88B/IL2RA/JAK3	10
GO:0031343	positive regulation of cell killing	8/371	63/18723	3.29864e-05	0.000993116	0.00078563	ITGAM/KLRD1/TYROBP/PRF1/CD226/SYK/HLA-F/HLA-E	8
GO:0032930	positive regulation of superoxide anion generation	5/371	20/18723	3.60761e-05	0.00106981	0.000846297	ITGAM/TYROBP/SYK/ITGB2/GNAI2	5
GO:0046629	gamma-delta T cell activation	5/371	20/18723	3.60761e-05	0.00106981	0.000846297	TCF7/KLRC1/SYK/SOX4/NCKAP1L	5
GO:0030888	regulation of B cell proliferation	8/371	64/18723	3.70555e-05	0.00109065	0.000862786	TYROBP/CD300A/ATM/GPR183/CD81/CARD11/INPP5D/NCKAP1L	8
GO:0042129	regulation of T cell proliferation	13/371	171/18723	3.77806e-05	0.00110375	0.000873152	SYK/HLA-E/SPN/CD81/RAC2/CARD11/CORO1A/RASAL3/NCKAP1L/CCDC88B/PTPN6/IL2RA/JAK3	13
GO:1903900	regulation of viral life cycle	12/371	148/18723	3.99022e-05	0.00115716	0.000915403	IFITM3/IFITM2/PABPC1/PPIA/APOBEC3C/LARP1/TOP2B/NOTCH1/MAVS/FAM111A/TRIM28/APOBEC3G	12
GO:0002274	myeloid leukocyte activation	15/371	223/18723	4.08659e-05	0.00117646	0.000930669	ITGAM/TYROBP/TSPAN32/FCER1G/FGR/CD226/PRAM1/CD300A/SYK/ITGB2/PREX1/VAMP2/RAC2/FOXP1/PIK3CD	15
GO:0043312	neutrophil degranulation	4/371	11/18723	4.48365e-05	0.0012722	0.0010064	ITGAM/PRAM1/SYK/ITGB2	4
GO:0046643	regulation of gamma-delta T cell activation	4/371	11/18723	4.48365e-05	0.0012722	0.0010064	TCF7/SYK/SOX4/NCKAP1L	4
GO:0046626	regulation of insulin receptor signaling pathway	8/371	66/18723	4.64586e-05	0.0013088	0.00103536	PIP4K2A/SORL1/OGT/CCND3/PRKCB/GNAI2/TSC2/NUCKS1	8
GO:0097305	response to alcohol	16/371	253/18723	4.80494e-05	0.00134402	0.00106322	KLF2/ABCA2/ADCY7/RPL27/HNRNPD/PTK2B/CALM1/LARP1/RPL15/RPL10A/CASP8/PTEN/DNMT3A/ACTR2/SMAD2/EEF2	16
GO:0050869	negative regulation of B cell activation	6/371	34/18723	4.88982e-05	0.00134863	0.00106687	TYROBP/CD300A/ATM/ID2/INPP5D/TBC1D10C	6
GO:0098751	bone cell development	6/371	34/18723	4.88982e-05	0.00134863	0.00106687	TYROBP/PIP4K2A/FLI1/FOXP1/WASF2/PTPN6	6
GO:0002832	negative regulation of response to biotic stimulus	10/371	108/18723	5.71499e-05	0.00156527	0.00123825	KLRD1/KLRC1/SIGIRR/NLRC3/SAMHD1/HLA-F/HLA-E/CARD8/ARRB2/RPS19	10
GO:0048259	regulation of receptor-mediated endocytosis	10/371	110/18723	6.6837e-05	0.00181797	0.00143815	ABCA2/SYK/TNK2/CD63/FLOT1/ANKRD13D/ARRB2/AAK1/RIN3/DNM2	10
GO:0045123	cellular extravasation	8/371	70/18723	7.12867e-05	0.00192443	0.00152237	SELL/RIPOR2/ITGAL/SELPLG/SPN/PECAM1/CD47/PIK3CD	8
GO:0043087	regulation of GTPase activity	19/371	348/18723	7.17271e-05	0.00192443	0.00152237	RIPOR2/ARHGAP25/RASGRP2/FGD3/ARAP1/PREX1/RASA3/ARAP2/PTK2B/SEMA4D/TBC1D2B/IQGAP2/ARRB2/SIPA1/RACK1/ARHGAP15/TSC2/RASAL3/TBC1D10C	19
GO:0034109	homotypic cell-cell adhesion	9/371	90/18723	7.34693e-05	0.00195607	0.0015474	TSPAN32/SYK/PPIA/UBASH3B/ACTB/GNAS/TLN1/FERMT3/PTPN6	9
GO:0019221	cytokine-mediated signaling pathway	23/371	472/18723	7.38983e-05	0.00195607	0.0015474	FCER1G/IFITM3/IFITM2/SIGIRR/TXK/SYK/SAMHD1/IL2RB/ACTN4/PTK2B/TMSB4X/CARD8/SP100/STAT6/CASP8/NOTCH1/TRAF5/MAVS/CASP4/TRIM44/PTPN6/IL2RA/JAK3	23
GO:1903306	negative regulation of regulated secretory pathway	5/371	23/18723	7.45582e-05	0.00196038	0.00155081	CD300A/HLA-F/GNAI2/NOTCH1/NCKAP1L	5
GO:1902905	positive regulation of supramolecular fiber organization	14/371	209/18723	7.67916e-05	0.00200573	0.00158669	EVL/PXN/PFN1/CLASP1/PTK2B/IQGAP2/ARPC5/GMFG/CD47/ARPC4/CORO1A/WASF2/NCKAP1L/ACTR2	14
GO:0045824	negative regulation of innate immune response	8/371	71/18723	7.89704e-05	0.00204907	0.00162097	KLRD1/KLRC1/NLRC3/SAMHD1/HLA-F/HLA-E/ARRB2/RPS19	8
GO:0002707	negative regulation of lymphocyte mediated immunity	7/371	53/18723	7.97356e-05	0.00205541	0.00162598	KLRD1/KLRC1/HLA-F/HLA-E/ARRB2/NCKAP1L/PTPN6	7
GO:0043029	T cell homeostasis	6/371	37/18723	8.03954e-05	0.00205896	0.00162879	TCIRG1/RPS6/CORO1A/NCKAP1L/IL2RA/JAK3	6
GO:0030100	regulation of endocytosis	14/371	211/18723	8.50441e-05	0.00216396	0.00171185	ABCA2/CD300A/SYK/TNK2/CD63/CALM1/FLOT1/ANKRD13D/ARRB2/AAK1/TSC2/RIN3/NCKAP1L/DNM2	14
GO:0016032	viral process	21/371	415/18723	8.95656e-05	0.0022644	0.00179131	IFITM3/IFITM2/CFL1/NCAM1/PABPC1/ITGA5/SELPLG/CTBP1/PPIA/APOBEC3C/LARP1/CD81/TOP2B/MDFIC/NOTCH1/MAVS/FAM111A/EPS15/NUCKS1/TRIM28/APOBEC3G	21
GO:0002286	T cell activation involved in immune response	10/371	114/18723	9.04479e-05	0.00226979	0.00179558	FCER1G/ITGAL/RPS6/GPR183/SPN/CD81/STAT6/FOXP1/NCKAP1L/JAK3	10
GO:0050671	positive regulation of lymphocyte proliferation	11/371	137/18723	9.09855e-05	0.00226979	0.00179558	SYK/GPR183/HLA-E/CD81/CARD11/CORO1A/RASAL3/NCKAP1L/CCDC88B/IL2RA/JAK3	11
GO:0032928	regulation of superoxide anion generation	5/371	24/18723	9.26564e-05	0.00226979	0.00179558	ITGAM/TYROBP/SYK/ITGB2/GNAI2	5
GO:0043302	positive regulation of leukocyte degranulation	5/371	24/18723	9.26564e-05	0.00226979	0.00179558	ITGAM/FGR/SYK/ITGB2/HLA-F	5
GO:0050855	regulation of B cell receptor signaling pathway	5/371	24/18723	9.26564e-05	0.00226979	0.00179558	CD300A/PRKCB/CD81/PLCL2/FOXP1	5
GO:0002460	adaptive immune response based on somatic recombination of immune receptors built from immunoglobulin superfamily domains	19/371	356/18723	9.67793e-05	0.00235054	0.00185945	KLRD1/FCER1G/PRF1/TRDC/CD226/KLRC1/TCIRG1/BTN3A2/HLA-F/HLA-E/SPN/CD81/STAT6/NOTCH1/INPP5D/NCKAP1L/PTPN6/KMT5B/JAK3	19
GO:0032946	positive regulation of mononuclear cell proliferation	11/371	138/18723	9.71444e-05	0.00235054	0.00185945	SYK/GPR183/HLA-E/CD81/CARD11/CORO1A/RASAL3/NCKAP1L/CCDC88B/IL2RA/JAK3	11
GO:0034314	Arp2/3 complex-mediated actin nucleation	6/371	39/18723	0.000109125	0.00262433	0.00207604	IQGAP2/ARPC5/GMFG/ARPC4/WASF2/ACTR2	6
GO:0042060	wound healing	21/371	422/18723	0.000113171	0.00270514	0.00213997	TSPAN32/FCER1G/TXK/CFLAR/SYK/ITGA5/CLASP1/DGKZ/PPIA/UBASH3B/PTEN/ACTB/GNAQ/ETS1/GNAS/TLN1/SMAD2/PLEC/FERMT3/PTPN6/MACF1	21
GO:0045071	negative regulation of viral genome replication	7/371	56/18723	0.000114015	0.00270889	0.00214294	IFITM3/IFITM2/APOBEC3C/MAVS/FAM111A/TRIM28/APOBEC3G	7
GO:0031333	negative regulation of protein-containing complex assembly	11/371	141/18723	0.000117802	0.0027821	0.00220085	TMC8/ADD3/SORL1/PFN1/SPTBN1/RPL13A/NLRC3/CRBN/TMSB4X/TMSB10/CARD8	11
GO:0007162	negative regulation of cell adhesion	17/371	303/18723	0.000123363	0.00289609	0.00229102	RIPOR2/CD300A/RUNX3/SPN/ACTN4/FXYD5/AKNA/SEMA4D/UBASH3B/ARHGDIB/SIPA1/PTEN/NOTCH1/NCKAP1L/PTPN6/IL2RA/JAK3	17
GO:0050857	positive regulation of antigen receptor-mediated signaling pathway	5/371	26/18723	0.000138801	0.00323925	0.00256249	CD226/PRKCB/CD81/FOXP1/CARD11	5
GO:0034340	response to type I interferon	7/371	58/18723	0.00014289	0.00331505	0.00262246	IFITM3/IFITM2/TRIM56/SAMHD1/SP100/MAVS/PTPN6	7
GO:1903706	regulation of hemopoiesis	19/371	367/18723	0.000143738	0.00331521	0.00262258	TCF7/TYROBP/KLF13/SYK/RUNX3/ZMIZ1/PTK2B/UBASH3B/CASP8/FOXP1/CARD11/ID2/INPP5D/ETS1/SOX4/NCKAP1L/PTPN6/IL2RA/JAK3	19
GO:0050856	regulation of T cell receptor signaling pathway	6/371	41/18723	0.00014546	0.00332111	0.00262725	CD226/CD300A/DGKZ/CD81/CARD11/PTPN6	6
GO:0007599	hemostasis	14/371	222/18723	0.000145677	0.00332111	0.00262725	TSPAN32/FCER1G/TXK/SYK/FLI1/DGKZ/PPIA/UBASH3B/ACTB/GNAQ/GNAS/TLN1/FERMT3/PTPN6	14
GO:1902105	regulation of leukocyte differentiation	16/371	279/18723	0.000151208	0.00340461	0.0026933	TCF7/TYROBP/SYK/RUNX3/ZMIZ1/UBASH3B/CASP8/FOXP1/CARD11/ID2/INPP5D/SOX4/NCKAP1L/PTPN6/IL2RA/JAK3	16
GO:0022613	ribonucleoprotein complex biogenesis	22/371	463/18723	0.000151585	0.00340461	0.0026933	KRI1/LUC7L3/DDX17/RPL27/ATM/RPL13A/RPL3/EIF4B/RPS6/RPS16/CELF2/RPL23A/RPL38/RPL10A/PTEN/RBM5/RPS19/SCAF11/RPL35/FBL/RPL7/LSM4	22
GO:0031032	actomyosin structure organization	13/371	196/18723	0.00015193	0.00340461	0.0026933	EVL/PXN/PFN1/CFLAR/ARAP1/CLASP1/PTK2B/ZYX/TTN/CD47/WASF2/EPB41/PLEC	13
GO:0042100	B cell proliferation	9/371	99/18723	0.000154067	0.00343301	0.00271576	TYROBP/CD300A/ATM/GPR183/CD81/PLCL2/CARD11/INPP5D/NCKAP1L	9
GO:1990266	neutrophil migration	10/371	122/18723	0.000159289	0.00352942	0.00279203	RIPOR2/FCER1G/SYK/ITGB2/PREX1/PPIA/PECAM1/RAC2/PIK3CD/NCKAP1L	10
GO:0060142	regulation of syncytium formation by plasma membrane fusion	5/371	27/18723	0.000167597	0.00369276	0.00292125	RIPOR2/TYROBP/CFLAR/CD53/FLOT1	5
GO:0051495	positive regulation of cytoskeleton organization	14/371	226/18723	0.000175545	0.0038464	0.00304279	EVL/PXN/PFN1/CLASP1/PTK2B/IQGAP2/ARPC5/GMFG/CD47/ARPC4/CORO1A/WASF2/NCKAP1L/ACTR2	14
GO:0097530	granulocyte migration	11/371	148/18723	0.000181002	0.00394405	0.00312004	RIPOR2/FCER1G/CD300A/SYK/ITGB2/PREX1/PPIA/PECAM1/RAC2/PIK3CD/NCKAP1L	11
GO:0010959	regulation of metal ion transport	20/371	406/18723	0.000187691	0.00406434	0.0032152	MLLT6/CRBN/ACTN4/PTK2B/SLC9A3R1/FXYD5/CD63/CALM1/VAMP2/GNAI2/UBASH3B/ARRB2/PTEN/CAB39/CORO1A/EPB41/UTRN/DNM2/IL16/PTPN6	20
GO:0045619	regulation of lymphocyte differentiation	12/371	174/18723	0.000188584	0.00406434	0.0032152	TCF7/SYK/RUNX3/ZMIZ1/CARD11/ID2/INPP5D/SOX4/NCKAP1L/PTPN6/IL2RA/JAK3	12
GO:0035710	CD4-positive, alpha-beta T cell activation	9/371	102/18723	0.000193538	0.00414844	0.00328173	TCIRG1/RUNX3/GPR183/SPN/CD81/STAT6/FOXP1/NCKAP1L/JAK3	9
GO:0070665	positive regulation of leukocyte proliferation	11/371	150/18723	0.000203625	0.00434106	0.0034341	SYK/GPR183/HLA-E/CD81/CARD11/CORO1A/RASAL3/NCKAP1L/CCDC88B/IL2RA/JAK3	11
GO:0030593	neutrophil chemotaxis	9/371	103/18723	0.00020843	0.0044196	0.00349624	RIPOR2/FCER1G/SYK/ITGB2/PREX1/PPIA/RAC2/PIK3CD/NCKAP1L	9
GO:0030521	androgen receptor signaling pathway	6/371	44/18723	0.000217233	0.00458165	0.00362443	DDX17/ZBTB7A/ZMIZ1/ARID1A/PRMT2/FOXP1	6
GO:0048015	phosphatidylinositol-mediated signaling	12/371	178/18723	0.00023292	0.00488637	0.00386548	FGR/HCST/OGT/NLRC3/SLC9A3R1/SEMA4D/RGL2/PLCL2/PTEN/PIK3CD/TSC2/PTPN6	12
GO:0060348	bone development	13/371	205/18723	0.000236509	0.00493541	0.00390428	TYROBP/PIP4K2A/FOXN3/RUNX2/RFLNB/FLI1/SEMA4D/CTC1/GLG1/FOXP1/WASF2/GNAS/PTPN6	13
GO:0031397	negative regulation of protein ubiquitination	8/371	83/18723	0.000238297	0.00494655	0.00391309	RPL23/OGT/RPS20/PPIA/ARRB2/SOX4/RPL37/TRIM44	8
GO:0030038	contractile actin filament bundle assembly	9/371	106/18723	0.000258931	0.00531887	0.00420763	EVL/PXN/PFN1/ARAP1/CLASP1/PTK2B/ZYX/CD47/WASF2	9
GO:0043149	stress fiber assembly	9/371	106/18723	0.000258931	0.00531887	0.00420763	EVL/PXN/PFN1/ARAP1/CLASP1/PTK2B/ZYX/CD47/WASF2	9
GO:0051607	defense response to virus	15/371	265/18723	0.000278031	0.00565233	0.00447142	ITGAX/TSPAN32/PRF1/IFITM3/IFITM2/UNC93B1/DDX17/TRIM56/SAMHD1/APOBEC3C/NLRP1/CARD8/MAVS/TRIM44/APOBEC3G	15
GO:0140546	defense response to symbiont	15/371	265/18723	0.000278031	0.00565233	0.00447142	ITGAX/TSPAN32/PRF1/IFITM3/IFITM2/UNC93B1/DDX17/TRIM56/SAMHD1/APOBEC3C/NLRP1/CARD8/MAVS/TRIM44/APOBEC3G	15
GO:0045070	positive regulation of viral genome replication	5/371	30/18723	0.000281762	0.00569363	0.00450409	PABPC1/PPIA/LARP1/TOP2B/NOTCH1	5
GO:0045089	positive regulation of innate immune response	10/371	131/18723	0.000284941	0.00569363	0.00450409	KLRD1/TYROBP/CD226/TXK/SH2D1B/SYK/HLA-F/HLA-E/MAVS/RPS19	10
GO:0050853	B cell receptor signaling pathway	10/371	131/18723	0.000284941	0.00569363	0.00450409	TRDC/CD300A/SYK/PRKCB/CD81/PLCL2/FOXP1/PIK3CD/NCKAP1L/PTPN6	10
GO:0048017	inositol lipid-mediated signaling	12/371	182/18723	0.000285836	0.00569363	0.00450409	FGR/HCST/OGT/NLRC3/SLC9A3R1/SEMA4D/RGL2/PLCL2/PTEN/PIK3CD/TSC2/PTPN6	12
GO:0032102	negative regulation of response to external stimulus	20/371	420/18723	0.000292187	0.00579088	0.00458102	KLRD1/FGR/KLRC1/SIGIRR/SYK/NLRC3/SAMHD1/HLA-F/HLA-E/CLASP1/SEMA4D/CARD8/NUCB2/UBASH3B/ARRB2/PTEN/NOTCH1/RPS19/RIN3/IL2RA	20
GO:0035855	megakaryocyte development	4/371	17/18723	0.000294272	0.00580305	0.00459064	PIP4K2A/FLI1/WASF2/PTPN6	4
GO:0002819	regulation of adaptive immune response	12/371	183/18723	0.000300555	0.00589746	0.00466533	KLRD1/CD226/KLRC1/ADCY7/HLA-F/HLA-E/CD81/STAT6/NCKAP1L/PTPN6/KMT5B/JAK3	12
GO:0051348	negative regulation of transferase activity	15/371	268/18723	0.0003135	0.00612102	0.00484219	RPL23/PIP4K2A/SORL1/CD300A/STK38/RPS20/PPIA/UBASH3B/PTEN/RACK1/GNAQ/TSC2/RPL37/PLEC/PTPN6	15
GO:0072678	T cell migration	7/371	66/18723	0.000323236	0.00628002	0.00496797	RIPOR2/ITGAL/GPR183/SPN/MSN/PIK3CD/PLEC	7
GO:0001776	leukocyte homeostasis	8/371	87/18723	0.000329655	0.00635916	0.00503057	TCIRG1/RPS6/GPR183/CORO1A/PIK3CD/NCKAP1L/IL2RA/JAK3	8
GO:0002717	positive regulation of natural killer cell mediated immunity	5/371	31/18723	0.000330534	0.00635916	0.00503057	KLRD1/CD226/SH2D1B/HLA-F/HLA-E	5
GO:0030101	natural killer cell activation	8/371	88/18723	0.000356467	0.00682479	0.00539892	TYROBP/FGR/HLA-F/HLA-E/NCR1/CASP8/CORO1A/PIK3CD	8
GO:0031589	cell-substrate adhesion	18/371	363/18723	0.000360239	0.00686367	0.00542968	PXN/ITGAL/ITGB2/PREX1/ITGA5/ACTN4/CLASP1/PTK2B/CD63/RAC2/ZYX/PTEN/NOTCH1/CORO1A/UTRN/DNM2/FERMT3/MACF1	18
GO:0014066	regulation of phosphatidylinositol 3-kinase signaling	9/371	111/18723	0.000365441	0.00692932	0.00548161	FGR/HCST/NLRC3/SLC9A3R1/SEMA4D/RGL2/PTEN/TSC2/PTPN6	9
GO:0030889	negative regulation of B cell proliferation	4/371	18/18723	0.000372464	0.00699524	0.00553376	TYROBP/CD300A/ATM/INPP5D	4
GO:1902170	cellular response to reactive nitrogen species	4/371	18/18723	0.000372464	0.00699524	0.00553376	CFLAR/HNRNPD/STAT6/DNM2	4
GO:0001913	T cell mediated cytotoxicity	6/371	49/18723	0.000395998	0.00740197	0.00585551	KLRD1/PRF1/KLRC1/HLA-F/HLA-E/NCKAP1L	6
GO:0007596	blood coagulation	13/371	217/18723	0.00040963	0.00759936	0.00601166	TSPAN32/FCER1G/TXK/SYK/DGKZ/PPIA/UBASH3B/ACTB/GNAQ/GNAS/TLN1/FERMT3/PTPN6	13
GO:0009615	response to virus	18/371	367/18723	0.000410412	0.00759936	0.00601166	ITGAX/TSPAN32/PRF1/IFITM3/IFITM2/FGR/CFL1/UNC93B1/DDX17/TRIM56/SAMHD1/APOBEC3C/NLRP1/CARD8/TPT1/MAVS/TRIM44/APOBEC3G	18
GO:0060337	type I interferon signaling pathway	6/371	50/18723	0.000442584	0.00812339	0.00642621	IFITM3/IFITM2/SAMHD1/SP100/MAVS/PTPN6	6
GO:0002431	Fc receptor mediated stimulatory signaling pathway	5/371	33/18723	0.000446951	0.00812339	0.00642621	FCER1G/FGR/CD226/SYK/CD47	5
GO:0045920	negative regulation of exocytosis	5/371	33/18723	0.000446951	0.00812339	0.00642621	CD300A/HLA-F/GNAI2/NOTCH1/NCKAP1L	5
GO:0071353	cellular response to interleukin-4	5/371	33/18723	0.000446951	0.00812339	0.00642621	TCF7/RPL3/STAT6/CORO1A/JAK3	5
GO:0032635	interleukin-6 production	11/371	165/18723	0.000462553	0.00825139	0.00652747	KLF2/TYROBP/SYK/NLRC3/ARRB2/CD47/INPP5D/MAVS/NCKAP1L/IL16/PTPN6	11
GO:0032675	regulation of interleukin-6 production	11/371	165/18723	0.000462553	0.00825139	0.00652747	KLF2/TYROBP/SYK/NLRC3/ARRB2/CD47/INPP5D/MAVS/NCKAP1L/IL16/PTPN6	11
GO:0014067	negative regulation of phosphatidylinositol 3-kinase signaling	4/371	19/18723	0.000464454	0.00825139	0.00652747	NLRC3/SLC9A3R1/PTEN/TSC2	4
GO:0045091	regulation of single stranded viral RNA replication via double stranded DNA intermediate	4/371	19/18723	0.000464454	0.00825139	0.00652747	APOBEC3C/TOP2B/TRIM28/APOBEC3G	4
GO:1901739	regulation of myoblast fusion	4/371	19/18723	0.000464454	0.00825139	0.00652747	RIPOR2/CFLAR/CD53/FLOT1	4
GO:0048525	negative regulation of viral process	8/371	92/18723	0.000482071	0.00852595	0.00674467	IFITM3/IFITM2/PPIA/APOBEC3C/MAVS/FAM111A/TRIM28/APOBEC3G	8
GO:0050817	coagulation	13/371	222/18723	0.000508508	0.00895336	0.00708278	TSPAN32/FCER1G/TXK/SYK/DGKZ/PPIA/UBASH3B/ACTB/GNAQ/GNAS/TLN1/FERMT3/PTPN6	13
GO:0002822	regulation of adaptive immune response based on somatic recombination of immune receptors built from immunoglobulin superfamily domains	11/371	168/18723	0.000538443	0.0094383	0.0074664	KLRD1/CD226/KLRC1/HLA-F/HLA-E/CD81/STAT6/NCKAP1L/PTPN6/KMT5B/JAK3	11
GO:0071357	cellular response to type I interferon	6/371	52/18723	0.000548501	0.00957207	0.00757222	IFITM3/IFITM2/SAMHD1/SP100/MAVS/PTPN6	6
GO:0001667	ameboidal-type cell migration	21/371	475/18723	0.000554164	0.00957796	0.00757689	EVL/PXN/PFN1/CAP1/HDAC7/CLASP1/PTK2B/TMSB4X/SEMA4D/SP100/ARHGDIB/PTEN/FOXP1/NOTCH1/WASF2/PIK3CD/ETS1/GLIPR2/ARHGAP4/PLEC/MACF1	21
GO:0030316	osteoclast differentiation	8/371	94/18723	0.000557132	0.00957796	0.00757689	TYROBP/TCIRG1/GPR183/CD81/UBASH3B/FOXP1/INPP5D/IREB2	8
GO:0022408	negative regulation of cell-cell adhesion	12/371	196/18723	0.000558553	0.00957796	0.00757689	RIPOR2/CD300A/RUNX3/SPN/FXYD5/AKNA/UBASH3B/NOTCH1/NCKAP1L/PTPN6/IL2RA/JAK3	12
GO:0043393	regulation of protein binding	12/371	196/18723	0.000558553	0.00957796	0.00757689	TMC8/HOPX/SORL1/MARK2/FLOT1/UBASH3B/PLCL2/ARRB2/RACK1/ACTB/MFNG/EPB41	12
GO:0039692	single stranded viral RNA replication via double stranded DNA intermediate	4/371	20/18723	0.000571549	0.00975839	0.00771962	APOBEC3C/TOP2B/TRIM28/APOBEC3G	4
GO:0018212	peptidyl-tyrosine modification	18/371	378/18723	0.000580801	0.00987362	0.00781077	FGR/TXK/CD300A/SYK/TPST2/DYRK2/ITGB2/ITGA5/PTK2B/TNK2/SEMA4D/PECAM1/CD81/TTN/ARRB2/RACK1/PTPN6/JAK3	18

[truncated: 4 more sheets: ILC3_c5, NK_c1, NK_c2, NK_like]
