# Supplementary material for: Tissue specific imprinting on innate lymphoid cells during homeostasis and disease process revealed by integrative inference of single-cell transcriptomics
Source: Front Immunol. 2023 Mar 7;14:1127413. doi: 10.3389/fimmu.2023.1127413 (PMC10028295; doi:10.3389/fimmu.2023.1127413)
Supplement: Supplementary file 8 [file Table_4.xlsx]

## Sheet: ILC1_c1
Supplementary Table4: Differentially expressed genes in ILC subsets across different tissues (DESeq2 on pseudo-bulk).
gene_id	baseMean	log2FoldChange	lfcSE	stat	pvalue	padj	weight	comparison
FTH1	9672.59	-3.93419	0.179383	-21.9318	1.29222e-106	7.61459e-103	1.84451	BLOOD
RPL41	21658.2	-2.78084	0.143347	-19.3994	7.8035e-84	2.30435e-80	1.84035	BLOOD
UBC	14377.3	-2.73575	0.141881	-19.282	7.609e-83	1.49457e-79	1.84451	BLOOD
RPS3A	7306.18	-2.52107	0.136362	-18.488	2.57988e-76	2.52742e-73	2.77365	BLOOD
RPL39	10451.8	-2.83824	0.172992	-16.4068	1.70922e-60	2.11104e-57	1.76003	BLOOD
RPL28	17257.4	-2.62948	0.167945	-15.6567	2.98839e-55	2.96204e-52	1.82762	BLOOD
RPL34	19325.2	-1.7786	0.121159	-14.6798	8.68379e-49	4.86126e-46	2.77365	BLOOD
RPS15	9368.32	-2.30719	0.159645	-14.452	2.43587e-47	1.81079e-44	1.82762	BLOOD
RPL12	10809	-1.82137	0.126459	-14.4029	4.96299e-47	3.27948e-44	1.82762	BLOOD
DDIT4	7069.46	-2.71966	0.190454	-14.2799	2.92151e-46	1.72154e-43	1.84451	BLOOD
TNFAIP3	16314.9	-3.03744	0.221847	-13.6916	1.13954e-42	6.39743e-40	1.76003	BLOOD
EEF1G	1652.35	-4.03084	0.298251	-13.5149	1.27698e-41	6.57161e-39	1.76003	BLOOD
HSPE1	6805	-2.71582	0.204673	-13.2691	3.49693e-40	1.0541e-37	2.77365	BLOOD
CRIP1	3429.82	-3.16613	0.24064	-13.1571	1.54904e-39	4.33584e-37	2.77365	BLOOD
RPS15A	12611.1	-2.4417	0.188302	-12.9669	1.88441e-38	7.40275e-36	1.84451	BLOOD
SRGN	16640.7	-2.36727	0.182896	-12.9433	2.56467e-38	9.89877e-36	1.76003	BLOOD
RPS12	17762.3	-1.62697	0.127066	-12.8041	1.55496e-37	5.64861e-35	1.76003	BLOOD
RPL35	4843.74	-1.9215	0.150481	-12.7691	2.44043e-37	7.98918e-35	1.84451	BLOOD
RPS21	8920.48	-1.93981	0.155266	-12.4934	8.10864e-36	2.5148e-33	1.84451	BLOOD
HSP90AA1	32461.5	-1.46506	0.117506	-12.4679	1.11716e-35	3.44949e-33	1.76003	BLOOD
RPS7	7436.12	-1.82436	0.148936	-12.2493	1.6938e-34	4.98095e-32	1.76003	BLOOD
RPS27	18994.1	-2.33852	0.192593	-12.1423	6.30534e-34	1.12311e-31	2.77365	BLOOD
PTMA	10854.1	-2.36636	0.197553	-11.9784	4.61397e-33	7.86111e-31	2.77365	BLOOD
MIF	1584.54	-3.11276	0.260178	-11.964	5.48751e-33	1.34733e-30	1.84451	BLOOD
DUSP1	42523.1	-2.345	0.196208	-11.9516	6.37059e-33	1.50497e-30	1.84035	BLOOD
JUND	1885.72	-3.41334	0.286938	-11.8957	1.2455e-32	2.82279e-30	1.84451	BLOOD
TSPYL2	4333.42	-2.28707	0.192381	-11.8882	1.3629e-32	2.98119e-30	1.84035	BLOOD
PPP1R15A	10927.6	-3.18294	0.276661	-11.5048	1.24733e-30	2.64928e-28	1.82762	BLOOD
HSPD1	7957.62	-2.02279	0.176618	-11.4529	2.27301e-30	3.07143e-28	2.77365	BLOOD
RPLP1	26309.6	-1.83594	0.162405	-11.3047	1.24382e-29	1.62471e-27	2.77365	BLOOD
HSPB1	6848.53	-3.14104	0.279085	-11.2548	2.19389e-29	4.17966e-27	1.84035	BLOOD
ZFP36	18455.4	-3.12568	0.280549	-11.1413	7.89504e-29	1.43215e-26	1.84035	BLOOD
RPL21	5696.02	-2.78682	0.250161	-11.1401	8.00229e-29	1.43215e-26	1.84035	BLOOD
RPS29	10609.6	-1.99088	0.180432	-11.034	2.62043e-28	3.02017e-26	2.77365	BLOOD
MT2A	1667.3	-3.29473	0.299934	-10.9849	4.51889e-28	7.62523e-26	1.84035	BLOOD
DNAJB1	20389.2	-2.02004	0.186153	-10.8515	1.9625e-27	3.2123e-25	1.84451	BLOOD
NFKBIA	12681.9	-2.14416	0.198139	-10.8214	2.72446e-27	4.33897e-25	1.84451	BLOOD
RPS27A	13017.5	-1.71522	0.158954	-10.7907	3.80803e-27	5.91842e-25	1.84035	BLOOD
CH25H	1105.49	-9.64985	0.903462	-10.681	1.24967e-26	2.01984e-24	1.72426	BLOOD
RPL18A	7868.95	-2.08161	0.198191	-10.503	8.36356e-26	8.19348e-24	2.77365	BLOOD
MT-ND3	9037.41	-1.80747	0.173047	-10.445	1.54469e-25	2.18725e-23	1.82762	BLOOD
IL32	12476.4	-1.46255	0.140175	-10.4337	1.73903e-25	1.66211e-23	2.77365	BLOOD
FAU	10818	-1.60934	0.155297	-10.363	3.65335e-25	3.32936e-23	2.77365	BLOOD
RPL10	20603.6	-1.59869	0.157006	-10.1824	2.37713e-24	3.2622e-22	1.76003	BLOOD
RPL24	5386.16	-1.51333	0.148808	-10.1697	2.70689e-24	2.41077e-22	2.77365	BLOOD
ZFP36L2	23444.3	-1.65852	0.165428	-10.0257	1.17567e-23	1.50604e-21	1.84451	BLOOD
AREG	717.752	-6.1243	0.619247	-9.88991	4.60445e-23	6.44503e-21	1.61771	BLOOD
KLF6	18172.1	-1.87299	0.18949	-9.88437	4.86616e-23	6.15734e-21	1.82762	BLOOD
RPL37	13744.1	-1.77606	0.18036	-9.8473	7.04075e-23	8.48617e-21	1.84035	BLOOD
CCL5	15391.4	-1.68875	0.173163	-9.75242	1.8013e-22	2.1425e-20	1.82762	BLOOD
TMSB4X	29580.1	-1.32375	0.138311	-9.57083	1.06046e-21	1.22527e-19	1.84451	BLOOD
OGT	7816.63	1.48393	0.15733	9.43193	4.02606e-21	4.57262e-19	1.84035	BLOOD
CD69	13684	-1.83401	0.195015	-9.40447	5.22936e-21	6.09317e-19	1.76003	BLOOD
GAPDH	10739.1	-1.31989	0.143056	-9.22644	2.79786e-20	3.0531e-18	1.84451	BLOOD
RPL36	9668.38	-1.58197	0.17172	-9.21251	3.18587e-20	3.41329e-18	1.84451	BLOOD
RPL32	15016.4	-1.49823	0.164991	-9.08068	1.07903e-19	1.13798e-17	1.84035	BLOOD
CITED2	1834.79	-2.37236	0.262895	-9.02401	1.81335e-19	1.96462e-17	1.76003	BLOOD
UBB	4736.25	-1.77144	0.19903	-8.90033	5.56831e-19	5.92879e-17	1.76003	BLOOD
RPS8	12606.6	-1.68117	0.190334	-8.83269	1.02184e-18	1.02287e-16	1.84035	BLOOD
PPDPF	2262.57	-2.71654	0.308502	-8.8056	1.30155e-18	1.33961e-16	1.76003	BLOOD
GADD45B	2274.08	-2.54188	0.28963	-8.7763	1.68941e-18	1.63566e-16	1.84035	BLOOD
RPL26	6758.36	-1.47704	0.168975	-8.74116	2.30737e-18	2.19793e-16	1.84035	BLOOD
IKZF2	857.701	5.82656	0.66921	8.70662	3.13061e-18	3.1324e-16	1.72426	BLOOD
CYCS	2129.69	-2.02443	0.232987	-8.68905	3.65487e-18	3.52665e-16	1.76003	BLOOD
LGALS1	2035.45	-1.95437	0.22632	-8.6354	5.85238e-18	5.56019e-16	1.76003	BLOOD
RPL23A	4818.82	-1.59153	0.185335	-8.58733	8.901e-18	7.8284e-16	1.84451	BLOOD
RPL7A	8452.73	-1.28798	0.150387	-8.56442	1.08625e-17	9.41302e-16	1.84451	BLOOD
PFKFB3	716.132	-3.46176	0.404332	-8.5617	1.1122e-17	1.08298e-15	1.61771	BLOOD
C12orf57	1530.8	-2.62247	0.306727	-8.54986	1.23241e-17	7.31727e-16	2.77365	BLOOD
RPS19	24263.9	-1.26631	0.149366	-8.47792	2.29261e-17	1.28342e-15	2.77365	BLOOD
RGCC	2516.09	-1.89709	0.226612	-8.37156	5.68611e-17	4.69664e-15	1.82762	BLOOD
RPS26	8721.83	-2.83203	0.339982	-8.32993	8.08933e-17	4.46469e-15	2.77365	BLOOD
HSP90AB1	15940.5	-0.95687	0.115515	-8.28351	1.19601e-16	9.67611e-15	1.84035	BLOOD
POLR2L	1144.6	-2.58287	0.313503	-8.23873	1.74044e-16	1.58021e-14	1.61771	BLOOD
EEF1D	3951.35	-1.71438	0.208761	-8.21219	2.17192e-16	1.76482e-14	1.76003	BLOOD
HCST	2061.58	-1.74849	0.21419	-8.1633	3.26004e-16	1.70333e-14	2.77365	BLOOD
ATF3	458.109	-6.86013	0.852948	-8.04285	8.77737e-16	1.65209e-13	0.712913	BLOOD
MALAT1	448004	-1.21083	0.151325	-8.0015	1.22915e-15	9.28575e-14	1.84451	BLOOD
CACYBP	3880.14	-1.48733	0.186455	-7.97687	1.50097e-15	1.12992e-13	1.82762	BLOOD
YPEL5	5287.74	-1.60694	0.201843	-7.96132	1.70209e-15	1.26531e-13	1.82762	BLOOD
RPL19	18775	-0.895622	0.112607	-7.95354	1.8126e-15	9.22462e-14	2.77365	BLOOD
RPL36AL	3878.62	-1.30699	0.166078	-7.86976	3.5532e-15	1.69802e-13	2.77365	BLOOD
RPL30	17916.9	-1.31667	0.167364	-7.86713	3.6286e-15	2.66766e-13	1.76003	BLOOD
DGKA	10384.1	1.94633	0.247706	7.85742	3.92113e-15	1.85127e-13	2.77365	BLOOD
ARPC1B	1140.11	-2.15089	0.274662	-7.83106	4.83776e-15	3.54353e-13	1.72544	BLOOD
NR4A2	2005.34	-3.14614	0.402002	-7.82618	5.02921e-15	3.49437e-13	1.84035	BLOOD
RPL14	7619.63	-1.38926	0.177585	-7.82308	5.15449e-15	3.65878e-13	1.76003	BLOOD
EEF1A1	29719.2	-1.18507	0.151786	-7.80752	5.83227e-15	3.91421e-13	1.84035	BLOOD
RPS25	10140.5	-1.53028	0.196069	-7.8048	5.9597e-15	3.94587e-13	1.84451	BLOOD
ICOS	1539.98	-2.41692	0.310027	-7.79585	6.39744e-15	4.22735e-13	1.82762	BLOOD
RPS23	11575.6	-1.19019	0.154605	-7.6983	1.37885e-14	5.93763e-13	2.77365	BLOOD
TRDC	2955.96	2.35786	0.308393	7.64563	2.07928e-14	1.34409e-12	1.82762	BLOOD
RPL29	6929.68	-1.61955	0.214088	-7.56486	3.88292e-14	2.48302e-12	1.82762	BLOOD
COMMD6	3356.09	-1.46802	0.195293	-7.51702	5.60393e-14	3.51296e-12	1.84451	BLOOD
DOK2	2640.15	-1.43267	0.190628	-7.51555	5.66703e-14	3.68385e-12	1.76003	BLOOD
LMNA	1092.89	-2.38882	0.319212	-7.48349	7.23762e-14	4.4526e-12	1.84035	BLOOD
RPL37A	10641	-1.12654	0.150664	-7.47713	7.59628e-14	4.62506e-12	1.84035	BLOOD
LRRN3	627.238	5.12267	0.685181	7.47638	7.6396e-14	6.93895e-12	1.22107	BLOOD
CSRNP1	1604.19	-2.4528	0.331224	-7.40527	1.30885e-13	8.16439e-12	1.76003	BLOOD
IER2	3797.36	-1.98733	0.270744	-7.34027	2.13161e-13	1.31637e-11	1.76003	BLOOD
MT-CYB	135793	0.790653	0.107935	7.3253	2.38363e-13	1.39067e-11	1.84451	BLOOD
RNASEK	1222.82	-2.31038	0.315634	-7.31981	2.48318e-13	1.63568e-11	1.61771	BLOOD
TOMM5	668.171	-2.49542	0.341516	-7.3069	2.73379e-13	2.42898e-11	1.18766	BLOOD
H3F3B	20802.8	-1.24351	0.172699	-7.20047	6.00061e-13	3.43136e-11	1.82762	BLOOD
RPL22	3709.05	-1.62452	0.2258	-7.19453	6.26742e-13	3.5498e-11	1.82762	BLOOD
BTG1	20875.4	-1.21331	0.168974	-7.18044	6.94883e-13	3.87164e-11	1.84035	BLOOD
RPS24	11933.4	-1.37511	0.192287	-7.15136	8.59251e-13	4.68819e-11	1.84451	BLOOD
ZFP36L1	6288.14	-1.70349	0.239417	-7.11515	1.11792e-12	5.98864e-11	1.84451	BLOOD
LEF1	4485.94	2.30284	0.324073	7.10592	1.19528e-12	6.35967e-11	1.84035	BLOOD
TSC22D3	36046.9	-0.862997	0.121624	-7.09562	1.28768e-12	4.68819e-11	2.77365	BLOOD
HLA-A	23323.3	-1.02307	0.144274	-7.09114	1.33007e-12	6.99786e-11	1.84451	BLOOD
RPS14	29254.6	-1.12912	0.159488	-7.07965	1.44517e-12	5.19553e-11	2.77365	BLOOD
RPSA	4501.91	-1.09923	0.155411	-7.07302	1.51601e-12	7.97861e-11	1.82762	BLOOD
RPS2	8912.2	-1.0754	0.152746	-7.04047	1.91593e-12	9.92577e-11	1.84035	BLOOD
FTL	17359.7	-1.12266	0.159983	-7.01735	2.2611e-12	1.15859e-10	1.84451	BLOOD
PFN1	11876.9	-1.1131	0.159021	-6.99973	2.56458e-12	1.31481e-10	1.82762	BLOOD
NR4A3	254.82	-6.11474	0.886352	-6.89877	5.24551e-12	6.07873e-10	0.781597	BLOOD
ROMO1	1006.86	-2.18144	0.316841	-6.88496	5.78056e-12	3.29137e-10	1.61771	BLOOD
RPL13	18742	-1.14799	0.167352	-6.85977	6.89698e-12	3.42295e-10	1.84035	BLOOD
IFITM2	3838.83	-1.49656	0.218169	-6.85962	6.90421e-12	2.31241e-10	2.77365	BLOOD
TMSB10	20097.8	-1.20355	0.178073	-6.75873	1.39208e-11	6.77933e-10	1.84451	BLOOD
RPL38	5160.27	-1.36574	0.202386	-6.74819	1.49701e-11	7.18802e-10	1.84035	BLOOD
HSPA2	315.552	-5.10814	0.758084	-6.73823	1.6033e-11	1.49423e-09	0.897104	BLOOD
PTGER4	3725.89	-2.33257	0.348557	-6.69208	2.20015e-11	1.03126e-09	1.84035	BLOOD
JUN	8018.26	-3.77159	0.563714	-6.69061	2.22239e-11	7.13833e-10	2.77365	BLOOD
CHCHD2	1909.28	-1.44371	0.215864	-6.68803	2.26191e-11	1.09987e-09	1.76003	BLOOD
CST7	4420.34	-1.34112	0.200906	-6.67536	2.46633e-11	7.79413e-10	2.77365	BLOOD
MRPL41	542.223	-2.35648	0.353879	-6.65899	2.75714e-11	3.06826e-09	0.712913	BLOOD
RPS9	5542.53	-1.02977	0.154807	-6.65193	2.89276e-11	9.0686e-10	2.77365	BLOOD
RPL35A	12264.6	-1.38977	0.208948	-6.65127	2.90567e-11	1.35002e-09	1.82762	BLOOD
SNHG8	2428.92	-1.66771	0.250855	-6.6481	2.96898e-11	1.35621e-09	1.84451	BLOOD
CKLF	416.963	-2.65104	0.400211	-6.62411	3.49356e-11	4.77587e-09	0.567907	BLOOD
IL2RG	3553.18	-1.18905	0.179505	-6.62407	3.49435e-11	1.58635e-09	1.82762	BLOOD
SRSF7	10183.8	-0.909349	0.137752	-6.60134	4.07449e-11	1.83571e-09	1.82762	BLOOD
RPLP2	16605.3	-1.279	0.193951	-6.59443	4.26888e-11	1.90883e-09	1.82762	BLOOD
IDS	1809.26	-1.56016	0.238199	-6.54982	5.76078e-11	2.55671e-09	1.82762	BLOOD
DNAH1	378.818	5.55119	0.849518	6.53451	6.38174e-11	4.98807e-09	0.979283	BLOOD
IL7R	23950.2	0.95279	0.14597	6.5273	6.69669e-11	2.92837e-09	1.82762	BLOOD
MTRNR2L8	7268.96	-4.10985	0.632197	-6.5009	7.98403e-11	3.40919e-09	1.84451	BLOOD
SLC2A3	3744.14	-1.65524	0.255253	-6.4847	8.89106e-11	2.58082e-09	2.77365	BLOOD
GNLY	2500.44	2.82234	0.438268	6.43977	1.19658e-10	4.98807e-09	1.84035	BLOOD
NDUFA3	980.599	-2.03195	0.316499	-6.42008	1.36204e-10	6.26785e-09	1.65168	BLOOD
RPS20	5217.02	-1.06634	0.166378	-6.40912	1.46364e-10	4.12626e-09	2.77365	BLOOD
EEF1B2	3787.13	-1.24802	0.195392	-6.38724	1.68908e-10	6.92749e-09	1.84035	BLOOD
LAG3	1255.57	-2.82074	0.443218	-6.36423	1.96274e-10	8.5268e-09	1.72544	BLOOD
DRAIC	192.633	-6.87887	1.09199	-6.29936	2.98876e-10	3.17996e-08	0.667678	BLOOD
STK17B	6951.49	-0.915421	0.146303	-6.257	3.92453e-10	1.65999e-08	1.76003	BLOOD
HLA-C	24233.6	-0.807093	0.130315	-6.19338	5.88868e-10	2.44063e-08	1.76003	BLOOD
CARD16	1222.08	-1.76031	0.284229	-6.19327	5.89269e-10	2.47464e-08	1.72544	BLOOD
COX7A2	2871.8	-1.24272	0.200771	-6.18976	6.02564e-10	2.40823e-08	1.84035	BLOOD
BATF	813.77	-2.14601	0.348845	-6.15176	7.66287e-10	2.99711e-08	1.84035	BLOOD
RGS1	12712.3	-6.06128	0.986565	-6.14382	8.05623e-10	3.13024e-08	1.84035	BLOOD
ELOB	1503.1	-1.62689	0.265636	-6.12453	9.09541e-10	2.40823e-08	2.77365	BLOOD
BRD8	4931.16	1.43768	0.236287	6.08444	1.16898e-09	4.47296e-08	1.84451	BLOOD
HSPA5	7841.53	-1.40232	0.232002	-6.04443	1.49941e-09	5.75298e-08	1.82762	BLOOD
UQCR11	1585.91	-1.42046	0.235309	-6.03659	1.57405e-09	5.9457e-08	1.84451	BLOOD
TCF7	6505.66	2.25523	0.375022	6.01361	1.81435e-09	6.80974e-08	1.84451	BLOOD
RPL17	3792.41	-1.75453	0.293196	-5.98416	2.17511e-09	8.13043e-08	1.84035	BLOOD
PPP1R2	3986.91	-1.26634	0.211641	-5.98342	2.18495e-09	8.4332e-08	1.76003	BLOOD
CCDC85B	940.21	-2.48741	0.416025	-5.97899	2.24519e-09	8.73629e-08	1.72426	BLOOD
RIPOR2	7201.26	1.53343	0.256511	5.97802	2.2587e-09	8.4332e-08	1.82762	BLOOD
S100A11	2333.1	-1.39618	0.233917	-5.9687	2.39155e-09	8.73629e-08	1.84035	BLOOD
LTK	281.306	6.40165	1.07359	5.96281	2.47929e-09	1.61868e-07	0.979283	BLOOD
CD7	3259.57	-1.7409	0.292273	-5.95643	2.57806e-09	9.34102e-08	1.84035	BLOOD
RPS18	14144.7	-0.965557	0.162178	-5.95368	2.62179e-09	9.42026e-08	1.84451	BLOOD
RPS13	13092.6	-0.952055	0.160281	-5.9399	2.85195e-09	1.01238e-07	1.84451	BLOOD
ARL6IP4	418.721	-2.49602	0.421014	-5.92859	3.05538e-09	1.9602e-07	0.979283	BLOOD
ANKRD37	344.846	-2.88867	0.489331	-5.90332	3.56259e-09	2.24665e-07	0.979283	BLOOD
HIST1H4C	2722.13	-1.42323	0.241248	-5.89946	3.64703e-09	1.28686e-07	1.84451	BLOOD
UQCRB	2086.46	-1.31276	0.222633	-5.89652	3.71239e-09	1.36463e-07	1.76003	BLOOD
UTRN	5817.75	0.940617	0.159913	5.88207	4.05178e-09	1.41595e-07	1.84035	BLOOD
SYTL3	1438.85	-1.96285	0.333755	-5.88111	4.07529e-09	9.67859e-08	2.77365	BLOOD
PMAIP1	1155.74	-3.05025	0.519964	-5.86628	4.45679e-09	1.71511e-07	1.65168	BLOOD
COX7C	3518.31	-1.22061	0.210317	-5.8037	6.48691e-09	2.18428e-07	1.84451	BLOOD
IDI1	1480.37	-1.35551	0.233593	-5.80288	6.51862e-09	2.27433e-07	1.76003	BLOOD
COTL1	5128.51	-0.902757	0.155648	-5.79997	6.6325e-09	2.30106e-07	1.76003	BLOOD
SLC7A5	828.957	-3.34446	0.577008	-5.79621	6.78303e-09	2.49365e-07	1.65168	BLOOD
EEFSEC	280.876	4.54771	0.785609	5.78877	7.09052e-09	4.27702e-07	0.979283	BLOOD
HSPH1	7995.02	-1.59124	0.276214	-5.76092	8.36588e-09	1.90599e-07	2.77365	BLOOD
DDX5	48382.2	0.702261	0.121945	5.75885	8.46904e-09	2.77876e-07	1.84035	BLOOD
RGS2	1697.49	-1.65993	0.288803	-5.74762	9.05081e-09	2.03834e-07	2.77365	BLOOD
FXYD5	5405.32	-0.909548	0.158948	-5.7223	1.05091e-08	3.58556e-07	1.76003	BLOOD
ERC1	594.168	2.48196	0.435162	5.70354	1.17348e-08	6.85492e-07	0.979283	BLOOD
ALDOA	478.802	-5.86327	1.02852	-5.70071	1.19312e-08	8.24988e-07	0.801994	BLOOD
HSPA1A	41885.4	-4.19147	0.735652	-5.69762	1.21492e-08	3.94244e-07	1.84035	BLOOD
EIF1	23003.6	-0.943684	0.165708	-5.69486	1.2347e-08	3.97574e-07	1.84451	BLOOD
SCAND1	980.122	-1.7022	0.299596	-5.68166	1.33392e-08	4.71933e-07	1.65168	BLOOD
COX8A	1149.98	-1.63591	0.288174	-5.67681	1.37233e-08	4.38101e-07	1.84035	BLOOD
LUC7L3	3584.64	1.23524	0.218733	5.64724	1.63044e-08	5.13775e-07	1.84451	BLOOD
PITPNA	316.24	3.70625	0.659237	5.62203	1.88724e-08	1.12636e-06	0.897104	BLOOD
SH3BGRL3	9717.49	-0.708831	0.126106	-5.62089	1.89974e-08	6.00953e-07	1.82762	BLOOD
IGHM	269.771	5.15616	0.917561	5.61942	1.91602e-08	1.13793e-06	0.897104	BLOOD
GABARAP	642.827	-2.65472	0.47315	-5.61074	2.01468e-08	9.01162e-07	1.22107	BLOOD
FAM177A1	1850.65	-1.93906	0.345608	-5.61058	2.01645e-08	6.30108e-07	1.84035	BLOOD
HCP5	297.335	-2.82968	0.505555	-5.59718	2.17862e-08	1.50998e-06	0.732799	BLOOD
NFKBIZ	1383.72	-1.845	0.329896	-5.59269	2.23583e-08	7.22895e-07	1.76003	BLOOD
SAMHD1	3670.85	1.07237	0.192129	5.58153	2.38413e-08	7.38472e-07	1.82762	BLOOD
NDUFA13	860.967	-1.94963	0.349536	-5.57776	2.43638e-08	7.95204e-07	1.72544	BLOOD
COX17	409.617	-2.43321	0.436391	-5.57576	2.46446e-08	1.41675e-06	0.897104	BLOOD
TOB1	6945.05	-1.02951	0.185242	-5.55769	2.73375e-08	8.24988e-07	1.84451	BLOOD
FCGBP	233.938	5.73681	1.0327	5.55514	2.77382e-08	2.09048e-06	0.667678	BLOOD
C6orf62	7620.21	1.64554	0.296536	5.5492	2.86978e-08	8.95063e-07	1.76003	BLOOD
MT-ND4	93739	0.702837	0.12666	5.54899	2.87317e-08	8.61359e-07	1.84035	BLOOD
LIMS1	1000.67	-1.72783	0.312725	-5.52508	3.29345e-08	9.72545e-07	1.84035	BLOOD
IFITM1	9192.04	-1.02781	0.186107	-5.52268	3.3387e-08	9.81003e-07	1.84035	BLOOD
FOS	63219.3	-3.89259	0.705157	-5.52017	3.3868e-08	9.90209e-07	1.84035	BLOOD
MT1F	266.33	-3.22333	0.584172	-5.51777	3.43336e-08	1.7724e-06	0.979283	BLOOD
TUBA1B	1373.54	-1.40462	0.256028	-5.4862	4.10663e-08	8.24988e-07	2.77365	BLOOD
C9orf16	760.156	-2.22802	0.406665	-5.47876	4.28311e-08	1.23394e-06	1.84035	BLOOD
UBA52	8158.07	-0.852409	0.155791	-5.47149	4.46278e-08	1.27041e-06	1.84451	BLOOD
CORO1B	743.576	-1.93596	0.354335	-5.46364	4.66457e-08	1.32446e-06	1.84035	BLOOD
HMGB1	3546.11	-1.10282	0.202232	-5.45325	4.94576e-08	1.39758e-06	1.84035	BLOOD
OST4	2240.8	-1.24367	0.228089	-5.45259	4.96419e-08	1.44605e-06	1.76003	BLOOD
ZNF331	1801.06	-1.71536	0.315582	-5.43555	5.46291e-08	1.50998e-06	1.84035	BLOOD
TRA2B	3128.94	-1.07034	0.198153	-5.40156	6.60634e-08	1.2567e-06	2.77365	BLOOD
PHLDA1	1011.18	-2.55484	0.475111	-5.37736	7.55855e-08	2.28164e-06	1.65168	BLOOD
CCNH	1868.44	-1.24153	0.230953	-5.3757	7.62849e-08	1.41675e-06	2.77365	BLOOD
OAZ1	7978.6	-0.825334	0.153798	-5.36636	8.03417e-08	2.18167e-06	1.84451	BLOOD
ANKHD1	454.682	-3.0777	0.574445	-5.35769	8.4295e-08	3.3647e-06	1.22107	BLOOD
SMARCA1	62.1224	14.4222	2.69209	5.35727	8.44904e-08	5.00023e-06	0.801994	BLOOD
ESYT1	4828.61	1.19402	0.223458	5.34335	9.12452e-08	2.46068e-06	1.84035	BLOOD
UBL5	1960.1	-1.24717	0.233586	-5.33924	9.33386e-08	2.62005e-06	1.76003	BLOOD
MYL6	10348.9	-0.839611	0.157354	-5.33583	9.51106e-08	2.65771e-06	1.76003	BLOOD
SLC22A15	32.9489	14.3322	2.6923	5.32338	1.01856e-07	4.32248e-05	0.0945096	BLOOD
MED26	90.8098	-7.14799	1.34569	-5.31175	1.08578e-07	6.53636e-06	0.781597	BLOOD
CYBA	2301.75	-1.49976	0.282898	-5.30141	1.1491e-07	3.05699e-06	1.84035	BLOOD
MLXIP	1155.43	1.78576	0.338366	5.2776	1.30886e-07	3.68326e-06	1.72426	BLOOD
SOCS1	548.214	-2.72782	0.518791	-5.25804	1.45598e-07	9.3268e-06	0.712913	BLOOD
COX6A1	1114.96	-1.58206	0.301375	-5.24949	1.52517e-07	4.21864e-06	1.72426	BLOOD
TRMT112	1870.12	-1.22525	0.233575	-5.24563	1.55753e-07	4.21864e-06	1.76003	BLOOD
ADAP2	34.1498	14.0207	2.69229	5.20772	1.91172e-07	7.71574e-05	0.0909799	BLOOD
RAB6B	32.6057	14.0061	2.69231	5.20228	1.96858e-07	9.09813e-05	0.0776153	BLOOD
GZMM	896.672	-1.70903	0.328628	-5.20049	1.98767e-07	5.80638e-06	1.61771	BLOOD
COX6C	2166.89	-1.14431	0.22105	-5.17669	2.25853e-07	3.93351e-06	2.77365	BLOOD
RHOF	508.75	-2.07221	0.401206	-5.16496	2.40489e-07	9.03224e-06	1.22107	BLOOD
ZFP92	28.9621	13.9009	2.69237	5.16307	2.4293e-07	9.58153e-05	0.0903516	BLOOD
COX7B	1448.27	-1.30772	0.253314	-5.16245	2.43732e-07	4.21864e-06	2.77365	BLOOD
SOD1	5398.25	-0.862351	0.167179	-5.15824	2.49285e-07	6.63557e-06	1.76003	BLOOD
RAB33A	151.599	-5.58611	1.08447	-5.15102	2.59077e-07	1.47654e-05	0.781597	BLOOD
MT-ND5	59568.6	0.738221	0.144312	5.11544	3.13009e-07	7.98924e-06	1.82762	BLOOD
CARF	232.077	5.36934	1.0498	5.11465	3.14317e-07	3.17058e-05	0.408145	BLOOD
MAFF	268.95	-5.12604	1.0042	-5.10462	3.31466e-07	1.78261e-05	0.801994	BLOOD
YBX1	1438.13	-1.46451	0.2869	-5.1046	3.31497e-07	8.41408e-06	1.82762	BLOOD
RPLP0	11043.1	-0.679654	0.13316	-5.10404	3.32483e-07	8.41408e-06	1.82762	BLOOD
ITGA6	1330.16	2.07339	0.406753	5.09741	3.44334e-07	8.59758e-06	1.84451	BLOOD
TEAD1	28.371	13.7108	2.69238	5.09246	3.53447e-07	0.000133287	0.0903516	BLOOD
TOMM7	2772.52	-1.31691	0.259194	-5.08078	3.75883e-07	9.71237e-06	1.76003	BLOOD
CD3G	2738.79	-0.956396	0.188804	-5.06555	4.07228e-07	1.00211e-05	1.84035	BLOOD
NAA38	486.31	-1.93752	0.383048	-5.05815	4.2335e-07	1.85721e-05	0.979283	BLOOD
SORL1	5835.19	3.65336	0.724085	5.04549	4.52365e-07	1.11629e-05	1.82762	BLOOD
SNHG9	226.683	-2.65062	0.527543	-5.02446	5.04845e-07	2.858e-05	0.732799	BLOOD
KMT2C	2969.19	0.985571	0.196223	5.0227	5.09492e-07	1.2406e-05	1.84451	BLOOD
ZNF154	190.452	4.69747	0.936188	5.01765	5.23062e-07	3.20106e-05	0.667678	BLOOD
CHST2	220.258	4.45889	0.888985	5.0157	5.28403e-07	5.07996e-05	0.408145	BLOOD
RPL23	6204.58	-0.893994	0.178784	-5.0004	5.72112e-07	1.45393e-05	1.76003	BLOOD
HNRNPA1	3958.59	-0.839556	0.168366	-4.98651	6.14799e-07	1.47869e-05	1.84451	BLOOD
NDUFB6	837.895	-1.53795	0.309306	-4.97226	6.61766e-07	1.77141e-05	1.61771	BLOOD
BTG3	712.051	-2.73868	0.55089	-4.97137	6.64803e-07	1.74992e-05	1.65168	BLOOD
UBE2B	1734.6	-1.2822	0.258091	-4.96802	6.76385e-07	1.62386e-05	1.84035	BLOOD
STK38	2570.97	1.34675	0.271376	4.96265	6.95387e-07	1.65897e-05	1.84451	BLOOD
ATM	3865.37	1.32213	0.266669	4.95796	7.12357e-07	1.70139e-05	1.82762	BLOOD
S100A6	3621.9	-1.06606	0.215048	-4.95729	7.14845e-07	1.69851e-05	1.84451	BLOOD
IDH3B	1989.28	1.37654	0.280663	4.90458	9.36257e-07	2.26821e-05	1.76003	BLOOD
CUBN	206.663	5.61353	1.14546	4.90068	9.55062e-07	4.70671e-05	0.801994	BLOOD
CKS2	484.575	-2.6962	0.550529	-4.89747	9.70788e-07	5.28591e-05	0.712913	BLOOD
RPS27L	1347.46	-1.23406	0.252167	-4.89382	9.88948e-07	2.38563e-05	1.76003	BLOOD
SAP18	3365.05	-1.00184	0.204748	-4.89305	9.92858e-07	2.38575e-05	1.76003	BLOOD
RPS11	7663.46	-0.732341	0.150253	-4.87406	1.0933e-06	2.51684e-05	1.82762	BLOOD
SUMO2	1272.08	-1.34913	0.277189	-4.86716	1.13211e-06	2.85438e-05	1.65168	BLOOD
WIPF1	3834.28	-0.801003	0.164799	-4.86049	1.17095e-06	2.65983e-05	1.84035	BLOOD
MT1X	363.786	-2.6752	0.552356	-4.84326	1.27728e-06	5.50713e-05	0.897104	BLOOD
GGNBP2	3319.07	0.900964	0.186029	4.84314	1.27804e-06	2.8635e-05	1.84451	BLOOD
BIRC3	3727.51	-0.866195	0.179729	-4.81946	1.43947e-06	3.20084e-05	1.84451	BLOOD
TMUB1	367.181	-2.33537	0.484737	-4.81781	1.45144e-06	7.39756e-05	0.732799	BLOOD
SLC30A4	208.102	4.9981	1.03757	4.81713	1.45635e-06	7.39756e-05	0.732799	BLOOD
DRAP1	951.856	-1.61997	0.336472	-4.8146	1.47498e-06	3.4771e-05	1.72544	BLOOD
LDLRAP1	2698.65	1.61123	0.334665	4.81446	1.476e-06	2.26821e-05	2.77365	BLOOD
SON	6388.32	-0.734518	0.152774	-4.80786	1.52557e-06	3.50227e-05	1.76003	BLOOD
TNF	782.581	-2.7968	0.582531	-4.80112	1.57784e-06	3.4771e-05	1.84035	BLOOD
MID1IP1	256.141	-2.54883	0.531668	-4.79402	1.63472e-06	0.00010191	0.567907	BLOOD
RPS28	9932.85	-3.14061	0.655588	-4.79052	1.66348e-06	2.51684e-05	2.77365	BLOOD
COX20	274.23	-2.49063	0.519924	-4.79037	1.66472e-06	0.000103108	0.567907	BLOOD
C18orf32	318.958	-2.09214	0.437145	-4.78592	1.70204e-06	7.74054e-05	0.801994	BLOOD
NACA	7245.28	-0.71361	0.149878	-4.76126	1.92384e-06	4.19868e-05	1.84451	BLOOD
DDT	306.956	-2.70725	0.569006	-4.75785	1.95667e-06	7.92854e-05	0.897104	BLOOD
SELL	16541.2	3.36133	0.707091	4.75374	1.99684e-06	4.32598e-05	1.84451	BLOOD
CD79A	213.951	5.09489	1.07187	4.75325	2.00172e-06	9.15663e-05	0.781597	BLOOD
RPL10A	6041.35	-0.762779	0.160865	-4.74173	2.11902e-06	4.57383e-05	1.84451	BLOOD
PIM3	695.877	-1.47935	0.312233	-4.73796	2.15877e-06	5.21735e-05	1.61771	BLOOD
NCF1	201.648	-3.29694	0.696832	-4.73132	2.23063e-06	0.000106726	0.732799	BLOOD
LDHB	14665.9	0.800385	0.169207	4.7302	2.24296e-06	4.833e-05	1.82762	BLOOD
C19orf53	1219.11	-1.40086	0.296572	-4.72351	2.31804e-06	5.52281e-05	1.61771	BLOOD
CDC25B	2147.67	1.6809	0.356928	4.70934	2.48515e-06	5.24877e-05	1.84451	BLOOD
CD2	7137.67	-0.980912	0.208962	-4.69422	2.67626e-06	5.5851e-05	1.84035	BLOOD
VAMP2	1805.02	-1.03107	0.219717	-4.69271	2.69607e-06	5.60663e-05	1.84035	BLOOD
RPL11	23468.8	-0.788095	0.168144	-4.68703	2.77203e-06	6.00653e-05	1.76003	BLOOD
SPCS3	1192.07	-1.29747	0.277648	-4.67306	2.9674e-06	6.12773e-05	1.84035	BLOOD
BIN2	5423.94	0.917634	0.196709	4.66493	3.08729e-06	6.33876e-05	1.84451	BLOOD
HMGB3	72.5324	-6.96118	1.49283	-4.66309	3.11497e-06	0.000135366	0.781597	BLOOD
KARS	2442.02	1.45087	0.31125	4.66143	3.14021e-06	6.73342e-05	1.76003	BLOOD
CHMP7	4030.29	1.59877	0.343667	4.65208	3.28596e-06	4.69947e-05	2.77365	BLOOD
ITGAM	181.221	4.71377	1.01329	4.65192	3.28858e-06	0.000138842	0.801994	BLOOD
RPL27A	8054.49	-0.670171	0.144341	-4.64296	3.4346e-06	7.06779e-05	1.82762	BLOOD
NLRC5	2944.24	1.16595	0.251405	4.63774	3.52241e-06	7.15733e-05	1.84451	BLOOD
EMD	1130.19	-1.70379	0.367669	-4.63403	3.58618e-06	7.6838e-05	1.72544	BLOOD
METTL3	1207.26	1.6835	0.363432	4.63223	3.61752e-06	7.71574e-05	1.72544	BLOOD
ARID5A	1701.51	-1.25795	0.272041	-4.62414	3.76152e-06	7.63485e-05	1.82762	BLOOD
TRAF3IP3	5434.68	0.854057	0.184996	4.61663	3.90016e-06	7.74054e-05	1.84035	BLOOD
SEC61G	870.918	-1.54422	0.334982	-4.60985	4.02961e-06	8.41094e-05	1.72426	BLOOD
DEK	2191.12	-0.992881	0.215672	-4.60365	4.15143e-06	8.22964e-05	1.82762	BLOOD
RBM8A	1684.82	-1.32167	0.287402	-4.59867	4.2519e-06	8.40082e-05	1.82762	BLOOD
CCL3	376.658	-5.10472	1.11095	-4.59491	4.32944e-06	0.000177265	0.801994	BLOOD
MIR600HG	169.948	5.05724	1.10456	4.57851	4.68307e-06	0.000227566	0.667678	BLOOD
MS4A1	150.33	-5.43085	1.19056	-4.56161	5.07624e-06	0.000243761	0.667678	BLOOD
BIRC6	2784.76	0.975724	0.213908	4.56142	5.08098e-06	9.87487e-05	1.82762	BLOOD
CTSD	1366.03	-1.51691	0.333347	-4.55055	5.3507e-06	0.0001026	1.84035	BLOOD
CYTOR	924.626	-2.28882	0.50358	-4.5451	5.49095e-06	0.000115813	1.65168	BLOOD
TMEM258	1323.76	-1.33188	0.29412	-4.52836	5.94422e-06	0.000112882	1.84035	BLOOD
GIMAP4	6831.58	0.915177	0.202361	4.52249	6.11168e-06	0.000119818	1.76003	BLOOD
ST6GAL1	1978.7	1.85694	0.410662	4.52182	6.13098e-06	0.00011612	1.82762	BLOOD
CLEC2B	1602.22	-1.21264	0.268235	-4.52082	6.16e-06	0.00011612	1.84035	BLOOD
KRT86	219.799	-5.18522	1.14814	-4.51621	6.29566e-06	0.000273837	0.732799	BLOOD
NIN	2042.65	1.23577	0.274165	4.50741	6.56243e-06	0.000122373	1.84451	BLOOD
VIM	8674.97	-1.09208	0.242376	-4.50572	6.6149e-06	0.00012846	1.76003	BLOOD
MAPK9	137.114	4.44599	0.989637	4.49255	7.03765e-06	0.000300817	0.732799	BLOOD
ELOC	648.275	-1.78169	0.397615	-4.48093	7.43181e-06	0.000243761	0.979283	BLOOD
DPPA4	125.162	5.62257	1.25658	4.47449	7.65924e-06	0.000300005	0.801994	BLOOD
PAN2	717.633	3.43868	0.77012	4.46513	8.00215e-06	0.000156168	1.72426	BLOOD
ARL4A	806.621	-1.75801	0.394809	-4.4528	8.47562e-06	0.000163886	1.72426	BLOOD
SPSB3	208.06	-2.55677	0.574272	-4.4522	8.49941e-06	0.000338665	0.781597	BLOOD
SNHG6	986.661	-1.35085	0.304032	-4.44313	8.86615e-06	0.000170796	1.72544	BLOOD
RPS3	28227.2	-0.621004	0.139801	-4.44205	8.91063e-06	0.000163053	1.82762	BLOOD
BOD1L1	1115.16	1.33895	0.301474	4.44135	8.93981e-06	0.000162957	1.84035	BLOOD
JUNB	20389.7	-2.26964	0.512948	-4.42469	9.65788e-06	0.000179645	1.76003	BLOOD
MAP1LC3B	2831.13	-0.855778	0.193545	-4.42159	9.79761e-06	0.000177067	1.82762	BLOOD
SBDS	1818.76	-1.13487	0.2567	-4.42098	9.82532e-06	0.000177067	1.82762	BLOOD
SRP14	4784.85	-0.795613	0.180253	-4.41387	1.01537e-05	0.000125517	2.77365	BLOOD
SEC62	1827.56	-1.10073	0.249758	-4.40719	1.04721e-05	0.000194205	1.76003	BLOOD
PPARGC1B	127.587	4.36729	0.99154	4.40455	1.06003e-05	0.000426835	0.751891	BLOOD
MREG	125.843	5.15545	1.17807	4.37618	1.20778e-05	0.000479647	0.751891	BLOOD
RBM5	1860.76	1.49871	0.342662	4.37374	1.22138e-05	0.000148639	2.77365	BLOOD
TAP2	313.889	-5.01638	1.1473	-4.37232	1.22935e-05	0.000383271	0.979283	BLOOD
RAB11FIP1	860.294	-2.10064	0.481418	-4.36344	1.2803e-05	0.000240194	1.72426	BLOOD
RSBN1L	837.945	-1.34063	0.307603	-4.35832	1.31066e-05	0.000243761	1.72426	BLOOD
TPST1	113.631	5.52979	1.26888	4.35802	1.31243e-05	0.000498659	0.781597	BLOOD
SMIM10L1	403.193	-1.75455	0.403829	-4.34479	1.39408e-05	0.000429801	0.979283	BLOOD
UBE2E2	106.537	5.46765	1.25916	4.34231	1.40994e-05	0.000527066	0.781597	BLOOD
PRR13	1585.15	-1.19675	0.276217	-4.33266	1.47317e-05	0.000176001	2.77365	BLOOD
TCEA1	700.194	-1.46322	0.33824	-4.32599	1.51848e-05	0.00029079	1.65168	BLOOD
GADD45G	470.761	-4.73771	1.09769	-4.31606	1.5884e-05	0.000396042	1.22107	BLOOD
GLUD1	1313.53	-1.23317	0.28662	-4.30246	1.68915e-05	0.00029079	1.84451	BLOOD
DIDO1	1602.62	1.22743	0.285359	4.30135	1.69758e-05	0.00029079	1.84451	BLOOD
ITM2A	4061.52	-1.37268	0.319497	-4.29638	1.73613e-05	0.000297202	1.84035	BLOOD
EIF3D	3250.6	0.883862	0.205943	4.29178	1.77248e-05	0.000207956	2.77365	BLOOD
COL6A2	111.543	4.62753	1.07889	4.28916	1.79348e-05	0.000637954	0.801994	BLOOD
SOCS7	184.674	3.52283	0.822837	4.28132	1.85792e-05	0.000674582	0.781597	BLOOD
CLPP	1027.5	-1.43467	0.335123	-4.28104	1.86022e-05	0.000349753	1.65168	BLOOD
GATA3	2397.6	-1.1632	0.272149	-4.27413	1.91882e-05	0.000325644	1.84035	BLOOD
KIAA0895	74.2307	-6.0218	1.41205	-4.2646	2.00264e-05	0.000704955	0.801994	BLOOD
POLR2B	1734.52	1.26994	0.297789	4.26456	2.00296e-05	0.000352399	1.76003	BLOOD
POMP	1230.11	-1.23775	0.29033	-4.26326	2.0147e-05	0.000374814	1.65168	BLOOD
NME2	447.223	-4.71305	1.10722	-4.25665	2.07512e-05	0.000503155	1.22107	BLOOD
RPL31	13085.8	-0.625987	0.147205	-4.25249	2.1141e-05	0.000354708	1.84035	BLOOD
TOP2B	1543.45	1.08768	0.255994	4.24886	2.14856e-05	0.000374814	1.76003	BLOOD
SNRPD2	3689.03	-0.839582	0.197938	-4.24165	2.21883e-05	0.00025573	2.77365	BLOOD
S100A4	10223.1	-0.857734	0.202488	-4.23598	2.2756e-05	0.000377725	1.84451	BLOOD
DYRK2	1603.53	1.56457	0.370131	4.22708	2.36738e-05	0.000408372	1.76003	BLOOD
SLFN5	3715.01	0.776606	0.184845	4.2014	2.65272e-05	0.000453789	1.76003	BLOOD
NDUFB8	962.634	-1.22144	0.291678	-4.18762	2.81892e-05	0.000486831	1.72426	BLOOD
RPL8	18880.3	-0.675943	0.161416	-4.18758	2.81946e-05	0.000459987	1.84035	BLOOD
EXOC3	486.164	1.95312	0.466752	4.18449	2.85805e-05	0.0010773	0.712913	BLOOD
EPS8L2	237.742	-2.15709	0.516305	-4.17794	2.94162e-05	0.0010773	0.732799	BLOOD
MTFP1	319.652	-2.25262	0.539171	-4.17794	2.94167e-05	0.00134689	0.567907	BLOOD
CD74	9732.01	-1.19655	0.287037	-4.16861	3.06457e-05	0.000511491	1.76003	BLOOD
HNRNPL	1002.12	-1.5089	0.362419	-4.16342	3.13517e-05	0.000503155	1.84035	BLOOD
SPTBN1	2233.69	1.10182	0.264942	4.15873	3.20019e-05	0.000511044	1.84451	BLOOD
CCDC107	455.31	-1.78643	0.429657	-4.1578	3.21321e-05	0.000902865	0.979283	BLOOD
PNRC1	4532.65	-1.20689	0.290475	-4.15489	3.25446e-05	0.000516908	1.84451	BLOOD
TNFSF9	407.993	-4.6689	1.12565	-4.14773	3.35787e-05	0.00120885	0.732799	BLOOD
CD27	2811.13	-0.849443	0.204954	-4.14456	3.40462e-05	0.000537633	1.84035	BLOOD
NOP10	1110.03	-1.22136	0.295031	-4.13978	3.47636e-05	0.000581262	1.72426	BLOOD
RPS16	9782.84	-0.716562	0.173456	-4.13109	3.61044e-05	0.000571054	1.82762	BLOOD
RBL2	4645.03	0.689575	0.167261	4.12274	3.74399e-05	0.000589044	1.82762	BLOOD
H2AFZ	3275.56	-0.746806	0.181623	-4.11185	3.9251e-05	0.000637954	1.76003	BLOOD
ARHGAP15	5575.93	0.811377	0.197834	4.1013	4.10835e-05	0.000637954	1.84035	BLOOD
DYNLL1	2136.77	-0.894395	0.218188	-4.0992	4.14579e-05	0.00064543	1.82762	BLOOD
TSPAN3	813.446	2.39733	0.58572	4.09296	4.25901e-05	0.000698664	1.72544	BLOOD
LY6E	2481.66	-1.07254	0.262511	-4.0857	4.3944e-05	0.000474385	2.77365	BLOOD
ID2	5386.94	-0.95943	0.234943	-4.08366	4.43309e-05	0.000709235	1.76003	BLOOD
KRT10	893.268	-1.14744	0.281355	-4.07826	4.53744e-05	0.000734772	1.72544	BLOOD
H3F3A	2762.74	-1.85629	0.456261	-4.06849	4.73194e-05	0.000722132	1.84035	BLOOD
HSPA8	27071.9	-0.479976	0.118129	-4.06315	4.84159e-05	0.000738291	1.82762	BLOOD
SLC25A25	441.171	-1.81647	0.447159	-4.06225	4.86013e-05	0.00171919	0.712913	BLOOD
NDUFB7	576.808	-1.41573	0.348838	-4.05842	4.94058e-05	0.0017436	0.712913	BLOOD
ADAR	3562.29	0.861164	0.212417	4.05411	5.03254e-05	0.000792815	1.76003	BLOOD
EIF3L	4178.17	0.810493	0.199991	4.05264	5.06436e-05	0.000532051	2.77365	BLOOD
PPIB	1884.17	-0.897496	0.221803	-4.04636	5.20193e-05	0.000543589	2.77365	BLOOD
SNHG5	2010.5	-1.11407	0.275372	-4.0457	5.21676e-05	0.000817664	1.76003	BLOOD
ADGRG5	97.8291	4.89166	1.20947	4.04446	5.24431e-05	0.00179641	0.732799	BLOOD
ASH1L	2882.13	0.841289	0.208412	4.03666	5.42183e-05	0.000812947	1.84451	BLOOD
PFDN2	645.178	-1.62086	0.403258	-4.01941	5.83435e-05	0.00128659	1.18766	BLOOD
CEBPB	603.437	-1.38541	0.344745	-4.01866	5.85303e-05	0.00126148	1.22107	BLOOD
MORF4L1	1414.24	-1.08755	0.270646	-4.01835	5.86061e-05	0.000913941	1.76003	BLOOD
RILPL2	832.009	-1.32618	0.330178	-4.01656	5.90533e-05	0.000989438	1.61771	BLOOD
SERP1	3077.17	-0.797228	0.198944	-4.0073	6.14181e-05	0.000918144	1.82762	BLOOD
DBI	1455.58	-0.971823	0.242619	-4.00555	6.18736e-05	0.000918144	1.84035	BLOOD
TRMU	392.277	2.18356	0.547315	3.98959	6.61882e-05	0.00270675	0.567907	BLOOD
HMGB2	2763.93	-0.882374	0.221829	-3.97772	6.95797e-05	0.00101992	1.84451	BLOOD
SPAG1	139.923	-3.55445	0.894322	-3.97446	7.05378e-05	0.00247082	0.667678	BLOOD
TMA16	258.783	-2.2824	0.574562	-3.97242	7.11453e-05	0.00215897	0.801994	BLOOD
PCNT	917.664	1.78365	0.449175	3.97094	7.15895e-05	0.00110802	1.72544	BLOOD
SATB1	2208.18	1.38473	0.349096	3.96663	7.28975e-05	0.000734772	2.77365	BLOOD
TPI1	3127.99	-0.787619	0.198803	-3.9618	7.43872e-05	0.000745519	2.77365	BLOOD
C11orf65	143.144	4.56168	1.15219	3.95915	7.52162e-05	0.00226526	0.801994	BLOOD
OSBPL5	100.1	4.51494	1.14207	3.9533	7.70816e-05	0.00230289	0.801994	BLOOD
RPL27	6172.49	-0.735455	0.186145	-3.95098	7.78329e-05	0.00117808	1.76003	BLOOD
SYAP1	1160.39	-1.64548	0.417175	-3.94435	8.00171e-05	0.00129234	1.61771	BLOOD
PLXDC1	687.982	3.25298	0.825415	3.94103	8.11336e-05	0.00238516	0.801994	BLOOD
PDCL3	723.887	-2.03403	0.516337	-3.93934	8.17074e-05	0.00117958	1.84035	BLOOD
TCF12	1720.21	1.29145	0.328024	3.93706	8.24854e-05	0.00118529	1.84035	BLOOD
CTC1	1677.49	1.20345	0.307093	3.91884	8.89751e-05	0.00126928	1.84035	BLOOD
SPCS2	506.08	-1.46188	0.374275	-3.9059	9.38744e-05	0.00196166	1.18766	BLOOD
CFL1	14604.9	-0.578136	0.148102	-3.90362	9.47646e-05	0.00134214	1.84035	BLOOD
RASGRP2	1637.92	1.53026	0.392215	3.90159	9.55637e-05	0.00093855	2.77365	BLOOD
CDC42	1881.31	-0.93517	0.239893	-3.89829	9.68763e-05	0.00142104	1.76003	BLOOD
COX6B1	2193.88	-0.837646	0.214894	-3.89795	9.7009e-05	0.0013769	1.82762	BLOOD
MZT2B	304.888	-1.86477	0.479005	-3.89302	9.9005e-05	0.00238516	0.979283	BLOOD
BAZ2B	1523.43	1.47366	0.378749	3.89087	9.98854e-05	0.000978542	2.77365	BLOOD
ARHGAP25	3123.36	0.80105	0.206366	3.8817	0.000103728	0.0014618	1.82762	BLOOD
EAF2	161.84	3.58345	0.924329	3.87681	0.000105834	0.00305976	0.781597	BLOOD
BTF3	4413.25	-0.618651	0.159614	-3.87593	0.00010622	0.00148305	1.84035	BLOOD
PCBP2	2517.53	-1.09137	0.282105	-3.86866	0.000109437	0.00152436	1.84035	BLOOD
EVI2B	1766.86	-1.01606	0.262721	-3.86744	0.000109986	0.00106947	2.77365	BLOOD
UQCRH	1745.61	-0.932082	0.241071	-3.86642	0.000110445	0.00160482	1.76003	BLOOD
KLF3	865.278	1.532	0.396315	3.86562	0.000110807	0.0016385	1.72544	BLOOD
CRLF3	2049.02	1.06877	0.276662	3.8631	0.000111955	0.00108058	2.77365	BLOOD
TTN	1162.58	1.04085	0.26973	3.85887	0.000113915	0.00167659	1.72544	BLOOD
NUCB1	1460.93	-1.04977	0.272108	-3.85792	0.000114357	0.00165388	1.76003	BLOOD
RPL18	16486.5	-0.664417	0.172987	-3.84085	0.000122611	0.00169576	1.82762	BLOOD
GIMAP7	8843.62	0.710093	0.184957	3.83924	0.000123416	0.00117958	2.77365	BLOOD
USP12	254.009	-2.17231	0.567838	-3.82559	0.00013046	0.00359362	0.801994	BLOOD
SEMA4D	3102.85	0.83684	0.219	3.82119	0.000132811	0.00180324	1.84451	BLOOD
PECAM1	759.433	1.44332	0.378017	3.81814	0.000134464	0.00204859	1.61771	BLOOD
ZNF683	887.319	2.13231	0.562754	3.78906	0.000151217	0.00203399	1.84035	BLOOD
NUDC	2048.18	-1.06416	0.280888	-3.78854	0.000151535	0.00203399	1.84035	BLOOD
DDX17	5443.59	0.902099	0.238194	3.78724	0.000152332	0.00142104	2.77365	BLOOD
A2M	572.941	2.98998	0.789572	3.78684	0.000152577	0.00412733	0.801994	BLOOD
DDX24	4782.26	-0.961635	0.253987	-3.78617	0.00015299	0.00212311	1.76003	BLOOD
ILK	183.34	-2.34369	0.619415	-3.78371	0.000154505	0.00485551	0.667678	BLOOD
NDUFB1	638.831	-1.47403	0.389574	-3.7837	0.000154514	0.00349988	0.979283	BLOOD
TRAPPC5	178.069	-2.50129	0.661179	-3.78308	0.000154902	0.00425709	0.781597	BLOOD
CYTIP	6096.2	-0.627062	0.165948	-3.77866	0.000157676	0.0021021	1.84451	BLOOD
C16orf87	320.527	-3.2362	0.856526	-3.77828	0.000157913	0.00457459	0.732799	BLOOD
NEU1	1276.77	-1.45719	0.385754	-3.77751	0.000158407	0.0023297	1.61771	BLOOD
MSH2	794.655	2.52814	0.66942	3.77661	0.000158977	0.00230289	1.65168	BLOOD
ANKH	1158.99	1.43454	0.37985	3.7766	0.000158985	0.00211476	1.84035	BLOOD
SETX	3744.43	0.918651	0.24369	3.76976	0.000163405	0.00215897	1.84035	BLOOD
CSTB	1327.66	-0.928508	0.246492	-3.76689	0.000165294	0.00218935	1.82762	BLOOD
PSMB10	1186.46	-1.33584	0.354781	-3.76525	0.000166385	0.00218935	1.84035	BLOOD
NAMPT	479.035	-1.76509	0.470069	-3.75496	0.000173367	0.00319498	1.22107	BLOOD
ACTN1	2153.53	2.24281	0.597776	3.75193	0.000175481	0.00229288	1.84035	BLOOD
SLC16A1	209.087	3.14767	0.83916	3.75098	0.000176146	0.00545142	0.667678	BLOOD
SPEN	1348.96	1.46308	0.39006	3.75092	0.00017619	0.00230289	1.82762	BLOOD
ADD3	3936.1	0.835588	0.223007	3.74691	0.000179024	0.0023297	1.82762	BLOOD
CTDSP2	1106.13	1.41374	0.377422	3.74578	0.000179837	0.00244674	1.72544	BLOOD
CEP350	1700.35	1.39866	0.373545	3.74427	0.000180917	0.00241828	1.76003	BLOOD
PIM2	5770.16	0.780758	0.20856	3.74357	0.000181422	0.00233418	1.84451	BLOOD
HPS6	78.8714	5.17858	1.38427	3.74101	0.000183284	0.00560836	0.667678	BLOOD
MT-ND2	23637.3	0.44634	0.119373	3.73904	0.000184728	0.00168738	2.77365	BLOOD
NUP210	2275.87	0.9113	0.24374	3.73882	0.000184889	0.00238516	1.82762	BLOOD
RBM23	1036.76	1.18317	0.317545	3.726	0.000194539	0.00247082	1.84035	BLOOD
EIF1AX	696.91	-2.0464	0.549519	-3.72399	0.000196102	0.00264699	1.72426	BLOOD
ZNF407	659.048	2.1839	0.586641	3.72272	0.000197087	0.00365853	1.18766	BLOOD
RELB	529.567	-1.80243	0.485067	-3.71583	0.000202538	0.00374453	1.18766	BLOOD
NELL2	2047.85	2.7015	0.728037	3.71067	0.000206713	0.00186216	2.77365	BLOOD
VPS13D	1657.64	1.25682	0.338942	3.70806	0.000208854	0.00273837	1.76003	BLOOD
SRSF6	4156.85	0.907172	0.244667	3.70779	0.000209079	0.00264383	1.84451	BLOOD
CHMP1B	1090.29	-1.13082	0.305248	-3.7046	0.000211726	0.00292706	1.65168	BLOOD
PRR14L	1039.49	1.72877	0.466742	3.70391	0.000212304	0.00292889	1.65168	BLOOD
SYNE1	3305.51	0.881191	0.238067	3.70144	0.000214378	0.00192677	2.77365	BLOOD
EDF1	1822.09	-0.880859	0.238018	-3.7008	0.000214919	0.00271981	1.82762	BLOOD
PBX3	120.458	3.61875	0.978524	3.69817	0.00021716	0.0059371	0.732799	BLOOD
ZBP1	274.152	-1.96357	0.530971	-3.69808	0.000217238	0.0059371	0.732799	BLOOD
CAPRIN1	1247.92	1.15405	0.312101	3.69768	0.000217576	0.00288542	1.72544	BLOOD
FABP5	1851.02	-4.03599	1.0918	-3.69664	0.000218476	0.00274693	1.82762	BLOOD
ST13	1489.9	-1.06064	0.286991	-3.69572	0.000219261	0.00196166	2.77365	BLOOD
NDUFB11	1332.56	-1.1403	0.308568	-3.69544	0.000219505	0.00274038	1.84451	BLOOD
SLC4A8	117.021	4.20516	1.14174	3.68312	0.000230399	0.00593325	0.781597	BLOOD
MACF1	5519.58	0.827777	0.224766	3.68284	0.000230647	0.00287381	1.84035	BLOOD
ARHGDIA	1163.44	-1.36744	0.372173	-3.67421	0.000238589	0.00294174	1.84035	BLOOD
DUSP2	7324.27	-0.993987	0.270548	-3.67398	0.000238801	0.00294174	1.84451	BLOOD
RNF19A	1724.8	-1.43972	0.391957	-3.67315	0.000239576	0.00211476	2.77365	BLOOD
SCAPER	1622.48	1.15577	0.314872	3.67059	0.000241989	0.00297072	1.84451	BLOOD
ANAPC11	772.125	-1.18822	0.324624	-3.6603	0.000251924	0.00326755	1.72426	BLOOD
FGD3	3127.43	0.818814	0.224233	3.65162	0.000260591	0.00330446	1.76003	BLOOD
DDIAS	53.2101	8.92092	2.44409	3.64999	0.000262249	0.00696678	0.732799	BLOOD
BCAS2	1697.3	-1.28501	0.352121	-3.64934	0.00026292	0.00228446	2.77365	BLOOD
IL11RA	607.314	2.84694	0.780726	3.64653	0.00026581	0.00557214	0.979283	BLOOD
BTBD7	264.486	2.8967	0.795512	3.64131	0.000271258	0.00868805	0.567907	BLOOD
CDC42SE1	3902.2	0.80195	0.220385	3.63886	0.000273847	0.00346544	1.76003	BLOOD
PDE4D	924.492	-1.51526	0.416846	-3.63506	0.00027792	0.00356557	1.72544	BLOOD
IFI27L2	458.991	-2.05288	0.565111	-3.63271	0.000280458	0.00482865	1.22107	BLOOD
MTURN	83.3254	4.32194	1.18981	3.63246	0.000280728	0.00697116	0.781597	BLOOD
BLOC1S1	454.424	-1.4711	0.405951	-3.62384	0.000290265	0.00701213	0.801994	BLOOD
DCLRE1B	155.583	3.66318	1.01158	3.62124	0.000293195	0.00716557	0.781597	BLOOD
NDUFA1	1774.99	-0.965645	0.267284	-3.6128	0.000302911	0.00377141	1.76003	BLOOD
SKIL	794.543	-1.57681	0.437723	-3.6023	0.000315409	0.00397642	1.72426	BLOOD
CX3CR1	193.964	5.54033	1.53879	3.60044	0.000317681	0.00868805	0.667678	BLOOD
MAL	1606.23	2.60453	0.724025	3.59729	0.000321547	0.00381239	1.84451	BLOOD
STIP1	1461.65	-0.877818	0.244277	-3.59354	0.000326211	0.00271981	2.77365	BLOOD
ANXA1	14323.1	-0.504578	0.140481	-3.59179	0.000328415	0.00392192	1.82762	BLOOD
MIR181A1HG	212.795	2.6434	0.73635	3.58987	0.000330847	0.00893165	0.667678	BLOOD
NCOA4	1746.71	1.47808	0.412101	3.5867	0.000334888	0.00396358	1.84035	BLOOD
PIP4K2A	5672.75	0.86791	0.242078	3.58524	0.000336764	0.00414278	1.76003	BLOOD
LRRC27	78.6836	4.70496	1.31433	3.57973	0.000343944	0.00800908	0.801994	BLOOD
LAGE3	360.064	-1.83769	0.513654	-3.57767	0.000346671	0.00734292	0.897104	BLOOD
PLXNA1	85.4163	4.78418	1.33804	3.57551	0.000349547	0.00825513	0.781597	BLOOD
S1PR1	3308.36	1.93184	0.540584	3.57362	0.000352084	0.00416277	1.82762	BLOOD
RABGEF1	158.319	-2.39924	0.671772	-3.57152	0.000354921	0.00948717	0.667678	BLOOD
TRGC1	730.508	1.6342	0.457582	3.57138	0.0003551	0.00439766	1.72426	BLOOD
PGAM1	707.136	-1.13842	0.319161	-3.56692	0.000361207	0.00446146	1.72544	BLOOD
CREM	1834.45	-1.87909	0.52688	-3.56645	0.000361847	0.00439766	1.76003	BLOOD
RPL22L1	700.905	-1.45741	0.40876	-3.56545	0.000363237	0.00465948	1.65168	BLOOD
TNRC6C	1039.43	1.70858	0.47924	3.56519	0.000363594	0.0042522	1.84035	BLOOD
NDUFS5	1816.44	-1.11462	0.312818	-3.56316	0.000366424	0.0042684	1.84035	BLOOD
SPTY2D1	480.713	-1.42252	0.399421	-3.56146	0.000368795	0.0071811	0.979283	BLOOD
S100B	78.9568	5.17967	1.45596	3.55757	0.000374297	0.00855422	0.801994	BLOOD
TOMM20	1018.33	-1.11481	0.313509	-3.5559	0.000376688	0.00481256	1.65168	BLOOD
DGKQ	257.116	3.43473	0.96718	3.55128	0.000383358	0.00868805	0.801994	BLOOD
SNRPG	592.771	-1.24743	0.351573	-3.54812	0.000387986	0.00964959	0.712913	BLOOD
TTC3	3050.04	0.817771	0.230548	3.54707	0.000389542	0.00453355	1.82762	BLOOD
C11orf68	168.167	3.88132	1.09436	3.54666	0.000390151	0.00879785	0.801994	BLOOD
ISG15	1652.6	-1.6145	0.455516	-3.54434	0.000393602	0.00319498	2.77365	BLOOD
UBE2V1	485.124	-1.47804	0.417718	-3.53838	0.000402589	0.00994787	0.712913	BLOOD
TMEM63A	2136.65	1.52393	0.430759	3.53778	0.000403502	0.00326202	2.77365	BLOOD
VPS13B	1614.91	1.45579	0.411516	3.53763	0.00040373	0.00326202	2.77365	BLOOD
COPRS	49.2063	8.83613	2.49831	3.53684	0.000404941	0.220257	0.0100266	BLOOD
ZNF235	138.003	3.4786	0.984045	3.535	0.000407769	0.00914946	0.801994	BLOOD
TNFRSF4	369.02	-2.17111	0.614237	-3.53464	0.000408326	0.00983177	0.732799	BLOOD
EZH1	1397.67	1.52185	0.430732	3.53317	0.000410604	0.00471791	1.84035	BLOOD
ZNF593	66.8719	-3.5657	1.01027	-3.52945	0.000416426	0.00949324	0.781597	BLOOD
UQCRQ	1427.93	-1.06698	0.302526	-3.52689	0.000420472	0.00481256	1.84035	BLOOD
MTRNR2L1	11670.2	3.82895	1.08613	3.52532	0.00042297	0.00502315	1.76003	BLOOD
CDC16	687.853	1.3251	0.376516	3.51936	0.000432585	0.00703168	1.18766	BLOOD
ARHGAP30	4042.59	0.813227	0.231091	3.51908	0.000433043	0.00347024	2.77365	BLOOD
LINC01132	42.4405	-6.35017	1.80537	-3.51737	0.000435847	0.229945	0.0100266	BLOOD
DNAJB6	2278.33	-1.15069	0.327356	-3.51511	0.000439569	0.00499078	1.84451	BLOOD
DENND4B	870.587	2.57471	0.733111	3.51203	0.000444704	0.00554245	1.65168	BLOOD
BTN3A3	957.625	1.15285	0.328719	3.50709	0.000453035	0.0051355	1.84035	BLOOD
PCNX1	1413.31	1.21796	0.347414	3.50578	0.000455268	0.00537571	1.76003	BLOOD
GZMA	2672.18	-1.02127	0.291413	-3.50454	0.000457392	0.00517496	1.84035	BLOOD
CSGALNACT1	1016.93	2.62027	0.74793	3.50336	0.000459422	0.00566155	1.65168	BLOOD
NR3C1	2572.32	-0.791826	0.226105	-3.50203	0.000461725	0.00366264	2.77365	BLOOD
FAM120A	748.376	1.19219	0.340432	3.50199	0.000461794	0.00552365	1.72426	BLOOD
C4orf48	229.301	-2.20897	0.631177	-3.49976	0.000465677	0.011016	0.732799	BLOOD
SNAI1	77.0416	-6.50042	1.85819	-3.49826	0.00046831	0.0119679	0.667678	BLOOD
TPT1	14426.3	-0.503473	0.144114	-3.49356	0.000476617	0.00540933	1.82762	BLOOD
ARHGEF26	100.964	5.41615	1.55117	3.49166	0.00048003	0.0107321	0.781597	BLOOD
B9D2	256.271	-1.99446	0.572286	-3.48507	0.000492004	0.0140333	0.567907	BLOOD
UBA7	1687.82	1.38478	0.39784	3.48073	0.000500045	0.00557214	1.84035	BLOOD
GABARAPL1	1283.22	-1.39239	0.400426	-3.47728	0.000506535	0.00592391	1.72426	BLOOD
CD82	1109.14	-1.30724	0.376016	-3.47656	0.000507893	0.00562773	1.84035	BLOOD
SLC44A2	2548.47	0.91134	0.262389	3.47324	0.00051421	0.00566364	1.84451	BLOOD
PSD4	1144.68	1.09897	0.316616	3.47097	0.000518583	0.00599805	1.72426	BLOOD
CHORDC1	1198.46	-1.37624	0.396986	-3.46671	0.000526871	0.00580535	1.84035	BLOOD
CBLB	2295	-0.762115	0.219944	-3.46504	0.000530146	0.00583056	1.84035	BLOOD
HNRNPUL1	1582.74	-0.794124	0.229261	-3.46384	0.000532516	0.00601195	1.76003	BLOOD
ADD1	1697.58	0.853642	0.246506	3.46296	0.000534258	0.00590573	1.82762	BLOOD
PSMA2	471.851	-1.45688	0.420904	-3.46131	0.000537556	0.0126279	0.712913	BLOOD
ZNF266	1464.34	1.11532	0.322228	3.46128	0.000537621	0.00418006	2.77365	BLOOD
CD300A	935.44	1.52786	0.441586	3.45993	0.000540306	0.00656453	1.61771	BLOOD
EPM2A	86.5672	4.29567	1.24196	3.45877	0.000542644	0.0133406	0.667678	BLOOD
PCGF5	1034.61	-0.993309	0.287265	-3.45782	0.000544568	0.00626411	1.72426	BLOOD
GANAB	1618.56	1.10815	0.320536	3.45718	0.000545865	0.0059371	1.84035	BLOOD
MT1E	96.7763	-6.03112	1.74504	-3.45616	0.000547937	0.0117313	0.801994	BLOOD
CYFIP2	4652.77	0.735589	0.212981	3.45377	0.000552799	0.00598793	1.84451	BLOOD
SF3B5	1149.12	-0.959779	0.278015	-3.45225	0.000555923	0.00601195	1.84035	BLOOD
MYC	2062.85	1.1472	0.332365	3.45164	0.000557201	0.00626772	1.76003	BLOOD
ROCK2	246.293	2.75102	0.797962	3.44756	0.000565679	0.0120162	0.801994	BLOOD
LEKR1	65.9644	-4.37266	1.27028	-3.44228	0.000576834	0.0121768	0.801994	BLOOD
NUSAP1	190.495	2.84418	0.826908	3.43953	0.000582721	0.0131292	0.732799	BLOOD
GEM	235.381	-4.40438	1.28165	-3.43648	0.000589332	0.0142339	0.667678	BLOOD
APEX1	1785.21	0.885308	0.257878	3.43305	0.000596822	0.00640872	1.84035	BLOOD
GSE1	915.574	1.53378	0.446932	3.43179	0.000599605	0.00642691	1.84035	BLOOD
CD58	678.164	-1.35353	0.394622	-3.42995	0.000603698	0.0126259	0.801994	BLOOD
SYNGR2	1688.02	-0.955999	0.278931	-3.42737	0.000609463	0.00650604	1.84451	BLOOD
MRPL1	668.207	-1.30734	0.381845	-3.42376	0.000617612	0.0140333	0.712913	BLOOD
MRPL54	455.992	-1.4259	0.417434	-3.41587	0.000635794	0.00933865	1.22107	BLOOD
IFRD1	1789.4	-1.21845	0.356933	-3.41365	0.000640983	0.00703168	1.76003	BLOOD
MPI	444.107	2.32189	0.680192	3.41358	0.000641155	0.0131456	0.801994	BLOOD
UBE2G2	1350.69	1.02478	0.300257	3.413	0.000642516	0.00683412	1.84451	BLOOD
PTPN1	981.847	-1.27626	0.374127	-3.4113	0.000646545	0.00741228	1.65168	BLOOD
HERPUD1	2957.7	-1.21699	0.356907	-3.40983	0.000650043	0.00688932	1.84451	BLOOD
HLA-DRB1	1818.44	-1.66198	0.487588	-3.40858	0.000653019	0.00690843	1.84451	BLOOD
RPA1	1349.84	1.50441	0.441785	3.40531	0.0006609	0.00696678	1.84451	BLOOD
RAB27A	1054.69	-1.6343	0.47999	-3.40486	0.000661981	0.00769496	1.61771	BLOOD
WAS	547.347	-1.28158	0.376606	-3.40298	0.000666551	0.00966305	1.22107	BLOOD
CYTH1	3606.91	0.709151	0.208415	3.40259	0.000667495	0.0070384	1.82762	BLOOD
LAIR1	878.875	1.69786	0.499429	3.3996	0.00067484	0.00769496	1.65168	BLOOD
PFDN5	8494.02	-0.548488	0.161354	-3.39928	0.000675625	0.0070623	1.84035	BLOOD
TDRD7	137.127	3.79799	1.11761	3.39831	0.000678041	0.0233287	0.408145	BLOOD
GTF3A	5347.94	0.71082	0.209232	3.39728	0.000680595	0.00712599	1.82762	BLOOD
RHBDD2	1488.04	-0.993266	0.29248	-3.39602	0.00068374	0.00712191	1.84035	BLOOD
GNA15	74.5439	-7.06522	2.0834	-3.3912	0.000695873	0.0161138	0.667678	BLOOD
SPSB1	93.5418	-5.462	1.61233	-3.38764	0.000704979	0.0148555	0.751891	BLOOD
MCL1	5293.31	-0.85878	0.253541	-3.38714	0.000706243	0.00734292	1.82762	BLOOD
SLC39A1	316.08	-2.56945	0.758962	-3.38548	0.000710531	0.0122455	0.979283	BLOOD
CDCA7L	95.6062	5.36352	1.58465	3.38466	0.000712658	0.0145955	0.781597	BLOOD
FAM133B	423.896	-1.50545	0.444876	-3.38397	0.000714469	0.0188088	0.567907	BLOOD
ZNF532	64.5408	4.9857	1.47436	3.38162	0.000720608	0.0165272	0.667678	BLOOD
ENSA	1123.28	-0.940687	0.278207	-3.38125	0.000721562	0.00813065	1.65168	BLOOD
NDUFA4	2540.23	-0.866762	0.25636	-3.38104	0.000722125	0.00741709	1.84035	BLOOD
NFKB2	431.536	-1.48585	0.439598	-3.38003	0.000724791	0.0104225	1.22107	BLOOD
EZR	7146.39	-0.681116	0.201626	-3.37811	0.000729847	0.00544766	2.77365	BLOOD
BEND5	75.0217	5.1304	1.51887	3.37779	0.00073072	0.0153531	0.751891	BLOOD
HIST1H3H	57.4359	-6.02449	1.7838	-3.37733	0.000731943	0.0148555	0.781597	BLOOD
CCNL1	5383.76	-0.617492	0.183156	-3.3714	0.000747884	0.00766833	1.84035	BLOOD
ELMO2	1654.27	0.972094	0.288682	3.36736	0.000758928	0.00560071	2.77365	BLOOD
ZKSCAN4	124.81	3.4129	1.01421	3.3651	0.000765164	0.015436	0.781597	BLOOD
HNRNPLL	1664.24	-1.29251	0.384135	-3.36473	0.000766188	0.00779768	1.84451	BLOOD
POLE3	1199.97	0.958896	0.285173	3.36251	0.000772383	0.00855679	1.65168	BLOOD
LSM7	742.21	-1.15604	0.343995	-3.36063	0.00077765	0.00830277	1.72544	BLOOD
ARHGEF6	1971.13	0.937629	0.279113	3.35931	0.000781372	0.00792484	1.84451	BLOOD
ZC3H12A	944.682	-1.74347	0.519028	-3.35911	0.000781926	0.00833429	1.72544	BLOOD
CCDC17	82.5587	4.31229	1.28428	3.35776	0.000785768	0.0164772	0.732799	BLOOD
AACS	92.8973	4.01041	1.19438	3.35774	0.000785812	0.0157232	0.781597	BLOOD
SEC61B	1424.97	-1.13511	0.338681	-3.35155	0.000803591	0.00816929	1.82762	BLOOD
CSNK1G3	560.465	-2.00943	0.599729	-3.35057	0.000806468	0.0134803	0.979283	BLOOD
STK17A	2982.49	-0.752532	0.224602	-3.35051	0.000806621	0.00818609	1.82762	BLOOD
SAT1	5452.52	-1.00725	0.300683	-3.34988	0.00080846	0.00819078	1.82762	BLOOD
ARFGAP2	1352.59	1.11527	0.333429	3.34485	0.000823285	0.00825513	1.84035	BLOOD
TIGIT	1133.08	-1.26041	0.377313	-3.34048	0.000836335	0.00878052	1.72544	BLOOD
MFSD14A	181.527	-2.24755	0.672929	-3.33996	0.000837916	0.0164772	0.781597	BLOOD
RPL7	1602.09	-1.66433	0.498388	-3.33943	0.000839515	0.00868805	1.76003	BLOOD
RNF34	1422.92	1.11119	0.332955	3.33735	0.000845812	0.00872002	1.76003	BLOOD
TNFSF14	620.589	-2.2038	0.660804	-3.33504	0.000852881	0.0121766	1.18766	BLOOD
TTC21A	38.6301	-6.29403	1.88942	-3.33119	0.000864748	0.0793059	0.0945096	BLOOD
ESD	1033.02	1.10659	0.332645	3.32665	0.000878954	0.00964947	1.61771	BLOOD
RHOB	974.376	-3.80431	1.14423	-3.32478	0.000884868	0.00966701	1.61771	BLOOD
SERPINF1	65.0305	4.99292	1.5032	3.32153	0.000895269	0.017017	0.801994	BLOOD
PRKCB	1946.56	1.20122	0.361748	3.32059	0.000898261	0.00881242	1.84035	BLOOD
SH2D1B	111.022	-3.44671	1.03967	-3.31519	0.000915793	0.0187354	0.732799	BLOOD
DNHD1	443.614	2.68019	0.808571	3.31472	0.000917336	0.0148555	0.979283	BLOOD
VPS37B	559.467	-1.38618	0.41833	-3.31361	0.000921008	0.0128682	1.18766	BLOOD
BZW1	1685.42	-0.733824	0.221565	-3.312	0.000926307	0.00940853	1.76003	BLOOD
HSPBP1	409.41	-1.65462	0.500202	-3.3079	0.00093999	0.0232732	0.567907	BLOOD
BST2	1407.12	-0.860073	0.260065	-3.30714	0.000942533	0.00952634	1.76003	BLOOD
TUBA1A	1945.63	-1.20235	0.363635	-3.30647	0.000944796	0.00922298	1.84035	BLOOD
SLC2A14	38.7113	-4.1795	1.2646	-3.30499	0.000949808	0.0870834	0.0909799	BLOOD
C1orf21	79.6273	4.40811	1.33428	3.30373	0.000954069	0.0189185	0.751891	BLOOD
ASAP1-IT2	69.9257	5.0626	1.53359	3.30114	0.000962945	0.0190683	0.751891	BLOOD
SUSD1	72.0464	4.16636	1.26227	3.30069	0.000964486	0.0190727	0.751891	BLOOD
KLF7	364.633	2.2399	0.679087	3.2984	0.000972365	0.0195689	0.732799	BLOOD
NPM1	3559.27	-0.709502	0.215181	-3.29723	0.000976451	0.00688932	2.77365	BLOOD
NBL1	406.955	-3.41355	1.03793	-3.2888	0.00100616	0.0159761	0.979283	BLOOD
TSC1	518.246	2.5256	0.768289	3.2873	0.00101153	0.0206725	0.712913	BLOOD
TMEM160	417.075	-1.80649	0.549869	-3.28531	0.00101871	0.0161138	0.979283	BLOOD
CCNL2	3017.8	0.782315	0.238286	3.28309	0.00102675	0.00710865	2.77365	BLOOD
ZNF296	49.0085	-4.42168	1.34862	-3.27866	0.001043	0.399092	0.0100266	BLOOD
PIK3R5	1481.64	1.34365	0.410428	3.27377	0.00106123	0.0105533	1.76003	BLOOD
MTMR1	368.804	2.33239	0.71278	3.27224	0.001067	0.0179743	0.897104	BLOOD
AKR1C3	75.3125	4.63337	1.41696	3.26994	0.0010757	0.0227417	0.667678	BLOOD
KCNQ5	109.938	3.48514	1.06624	3.26863	0.00108071	0.020254	0.781597	BLOOD
CCR7	8087.2	1.21329	0.371222	3.26835	0.00108176	0.00739801	2.77365	BLOOD
HES6	63.3677	-6.9511	2.12751	-3.26724	0.00108601	0.0199432	0.801994	BLOOD
SEM1	989.741	-1.25822	0.38525	-3.26599	0.00109082	0.011016	1.72426	BLOOD
ING4	993.11	1.31436	0.402666	3.26415	0.00109793	0.0110205	1.72426	BLOOD
CCM2	1436.7	1.15436	0.353947	3.26139	0.00110867	0.0105371	1.84451	BLOOD
SFI1	1169.54	1.32593	0.406997	3.25784	0.00112263	0.0112251	1.72544	BLOOD
EPHX2	943.041	1.22253	0.375258	3.25784	0.00112264	0.0116893	1.65168	BLOOD
CNR2	228.552	3.89438	1.19568	3.25704	0.00112582	0.0208744	0.781597	BLOOD
RAB5C	694.296	-1.19327	0.366386	-3.25687	0.00112648	0.011914	1.61771	BLOOD
DPM3	197.282	-1.93007	0.593395	-3.2526	0.00114356	0.0206917	0.801994	BLOOD
HLA-DPA1	2895.41	-0.957013	0.294256	-3.25232	0.00114467	0.0109269	1.82762	BLOOD
CR2	416.575	3.51276	1.08026	3.25178	0.00114684	0.0222938	0.732799	BLOOD
AFMID	68.7172	-6.50377	2.00073	-3.2507	0.00115121	0.0212319	0.781597	BLOOD
ARF6	2068.78	-0.827902	0.254988	-3.24683	0.00116698	0.00788449	2.77365	BLOOD
DOCK11	1113.1	1.22809	0.378287	3.24645	0.00116854	0.011016	1.84035	BLOOD
NISCH	984.844	1.13021	0.348167	3.24618	0.00116964	0.0116765	1.72544	BLOOD
ENPP5	46.1745	8.3553	2.57808	3.24089	0.00119155	0.115156	0.0776153	BLOOD
EPRS	1898.33	1.04056	0.321083	3.24079	0.00119198	0.00801192	2.77365	BLOOD
TMEM256	255.425	-1.61617	0.498701	-3.24077	0.00119209	0.0245693	0.667678	BLOOD
UBXN8	84.1431	4.771	1.47278	3.23946	0.00119756	0.0219125	0.781597	BLOOD
SUSD3	1116.58	2.43803	0.75381	3.23428	0.0012195	0.0120218	1.72544	BLOOD
ZNF410	128.267	-2.17263	0.671943	-3.23335	0.00122348	0.0218471	0.801994	BLOOD
DPH7	871.605	1.45322	0.449903	3.23008	0.00123754	0.0127722	1.61771	BLOOD
SH2D2A	999.392	-1.44103	0.446771	-3.22544	0.00125778	0.0122923	1.72426	BLOOD
PPOX	512.857	2.60674	0.808566	3.2239	0.00126456	0.0244897	0.712913	BLOOD
RIOX2	611.344	2.03975	0.632962	3.22254	0.00127058	0.0224798	0.801994	BLOOD
TRABD2A	785.504	1.84518	0.572636	3.22225	0.00127186	0.0128171	1.65168	BLOOD
VPS11	697.661	1.541	0.478446	3.22084	0.00127816	0.012861	1.65168	BLOOD
CD52	10448.9	-0.544591	0.169091	-3.22069	0.00127883	0.008465	2.77365	BLOOD
POLDIP3	1079.64	1.19323	0.370597	3.21976	0.001283	0.011914	1.84035	BLOOD
CLIC1	4401.7	-0.649656	0.202092	-3.21465	0.00130602	0.012052	1.84035	BLOOD
PPAN	128.873	-2.53248	0.78798	-3.21389	0.00130949	0.0241367	0.751891	BLOOD
DDX56	1259.42	0.966645	0.301105	3.21032	0.00132585	0.0128171	1.72426	BLOOD
NDUFS6	567.724	-1.12815	0.351485	-3.20967	0.00132889	0.0170329	1.18766	BLOOD
PARP2	222.59	2.61626	0.815161	3.2095	0.00132965	0.0237339	0.781597	BLOOD
KCNA3	1919.51	1.15089	0.358727	3.20826	0.00133541	0.0122381	1.84451	BLOOD
CCDC136	148.981	4.42232	1.37845	3.20817	0.0013358	0.026677	0.667678	BLOOD
YPEL1	70.2963	4.13962	1.29132	3.20573	0.00134719	0.0235584	0.801994	BLOOD
IRF2BP1	105.736	2.74305	0.856309	3.20334	0.00135845	0.0269682	0.667678	BLOOD
MYLIP	1250.89	-1.03844	0.324482	-3.20028	0.00137292	0.0131292	1.72544	BLOOD
ZFAND2A	1568.72	-1.42406	0.445038	-3.19986	0.00137494	0.0125507	1.84035	BLOOD
DLG2	60.5421	4.92409	1.53976	3.19795	0.00138408	0.02547	0.732799	BLOOD
PACRGL	102.342	3.36314	1.05171	3.19779	0.00138483	0.0250231	0.751891	BLOOD
VAMP5	681.146	-1.14253	0.357704	-3.19407	0.00140284	0.0262747	0.712913	BLOOD
MYD88	1710.86	1.03369	0.323723	3.19313	0.00140739	0.0127588	1.84451	BLOOD
DNASE1	457.414	2.09726	0.65766	3.18897	0.00142782	0.026677	0.712913	BLOOD
WDR83OS	1010.38	-0.853423	0.267644	-3.18865	0.00142939	0.0135401	1.72544	BLOOD
PRRG4	196.15	-4.3167	1.35401	-3.18808	0.00143219	0.0245693	0.801994	BLOOD
DNAJC1	919.149	-1.01892	0.319826	-3.18585	0.00144331	0.0129941	1.84035	BLOOD
ZNF202	425.617	2.74524	0.861782	3.18554	0.00144484	0.0314232	0.567907	BLOOD
GRSF1	1605.61	1.00585	0.315787	3.1852	0.00144656	0.00933865	2.77365	BLOOD
RHEB	528.501	-1.21376	0.381173	-3.18429	0.00145112	0.0246753	0.801994	BLOOD
SLC3A2	2642.24	-0.852176	0.267884	-3.18114	0.00146697	0.0131292	1.84035	BLOOD
N4BP2	1273.58	0.889618	0.279783	3.17967	0.00147443	0.0138927	1.72426	BLOOD
CALM1	14968	-0.40296	0.12683	-3.17716	0.00148726	0.0133406	1.82762	BLOOD
SEC31B	765.38	1.43164	0.450766	3.17601	0.00149315	0.0147315	1.61771	BLOOD
NOL7	1549.31	-0.73611	0.232439	-3.16689	0.00154077	0.0136119	1.84451	BLOOD
PPP3CA	1121.61	-1.0551	0.333595	-3.1628	0.00156258	0.0138151	1.84035	BLOOD
ZNF428	189.503	-1.76665	0.558924	-3.1608	0.00157336	0.0297819	0.667678	BLOOD
NHSL2	1042.03	2.59968	0.823045	3.15861	0.00158524	0.015436	1.61771	BLOOD
EPHA4	764.031	1.87642	0.594185	3.15797	0.00158873	0.0147174	1.72544	BLOOD
EIF4A2	9943.16	0.495425	0.157016	3.15524	0.00160366	0.014171	1.82762	BLOOD
SMAD2	1224.37	0.967367	0.306699	3.15412	0.00160981	0.0148555	1.72544	BLOOD
BTBD6	90.3295	3.50598	1.11245	3.15159	0.00162385	0.0303842	0.667678	BLOOD
NUDT14	155.841	-1.95092	0.619142	-3.15101	0.00162705	0.0440333	0.408145	BLOOD
RBBP4	1521.06	0.841443	0.267166	3.14951	0.00163546	0.0144092	1.82762	BLOOD
EPB41	2427.96	1.01339	0.321797	3.14915	0.00163745	0.0103829	2.77365	BLOOD
LCK	11153.3	0.563479	0.179038	3.14727	0.00164804	0.0144558	1.82762	BLOOD
TNFRSF25	1323.05	1.07006	0.340207	3.14531	0.00165913	0.0144411	1.84451	BLOOD
MTHFD2	658.946	-1.35212	0.429984	-3.14459	0.0016632	0.0237272	0.979283	BLOOD
SNRPB2	1020.55	-1.03947	0.330763	-3.14265	0.00167426	0.0160699	1.61771	BLOOD
LONRF3	86.0956	3.61322	1.15084	3.13965	0.0016915	0.0293778	0.732799	BLOOD
NAF1	178.227	-2.85982	0.910945	-3.1394	0.00169296	0.045039	0.408145	BLOOD
KRTCAP2	541.274	-1.2854	0.409649	-3.13781	0.00170217	0.030036	0.712913	BLOOD
PDE4B	1370.27	-0.971743	0.30978	-3.13689	0.00170753	0.0148555	1.82762	BLOOD
RAB5A	833.266	-1.0791	0.344096	-3.13606	0.00171235	0.016319	1.61771	BLOOD
SLAIN1	78.686	5.17631	1.65114	3.13498	0.00171864	0.0296853	0.732799	BLOOD
NCAPH	34.6084	-5.87567	1.87442	-3.13466	0.00172056	0.133706	0.0903516	BLOOD
LTN1	1661.78	0.853321	0.272419	3.13238	0.00173394	0.0149061	1.84035	BLOOD
CAB39L	104.292	3.40644	1.08792	3.13115	0.00174126	0.0286558	0.781597	BLOOD
MAZ	305.811	-1.43253	0.457576	-3.13069	0.00174399	0.0281709	0.801994	BLOOD
TPGS2	840.085	1.0586	0.33842	3.12806	0.00175967	0.0159034	1.72544	BLOOD
ZNF638	2756.94	0.877522	0.280546	3.12791	0.00176057	0.011016	2.77365	BLOOD
CALM3	1384.04	-0.822568	0.263298	-3.12409	0.00178355	0.0111115	2.77365	BLOOD
TCEANC	282.595	2.85012	0.912354	3.12392	0.00178461	0.0303899	0.732799	BLOOD
RALGAPB	865.509	1.41477	0.452909	3.12374	0.00178569	0.0165272	1.65168	BLOOD
YTHDC1	1460.13	-0.741237	0.237645	-3.1191	0.00181407	0.0154698	1.84451	BLOOD
NOP58	3141.13	-0.742272	0.238111	-3.11733	0.00182496	0.0156386	1.82762	BLOOD
CISH	1149.31	1.38145	0.44325	3.11664	0.00182922	0.0155891	1.84035	BLOOD
FLNB	461.761	1.55025	0.497456	3.11636	0.00183097	0.0316494	0.712913	BLOOD
SEMA7A	133.664	-3.70844	1.19239	-3.1101	0.00187026	0.0295791	0.801994	BLOOD
AOAH	1266.95	1.25004	0.402215	3.1079	0.00188423	0.0159429	1.84035	BLOOD
LCORL	406.217	1.81856	0.585209	3.10754	0.00188651	0.0274361	0.897104	BLOOD
RASGRP1	1411.5	0.834199	0.268478	3.10714	0.00188906	0.0164772	1.76003	BLOOD
MT-ATP8	6825.05	0.669502	0.215638	3.10475	0.00190442	0.0161138	1.82762	BLOOD
WDR90	28.6905	8.35519	2.69193	3.10379	0.00191058	0.160358	0.0776153	BLOOD
PEX11B	617.326	2.53791	0.81778	3.10341	0.00191304	0.0261165	0.979283	BLOOD
CASC3	1401.08	1.0092	0.325296	3.10241	0.00191951	0.0118642	2.77365	BLOOD
STS	69.1391	-5.86893	1.89238	-3.10135	0.0019264	0.0301568	0.801994	BLOOD
PI4K2B	155.166	-3.04179	0.981799	-3.09818	0.00194712	0.0325959	0.732799	BLOOD
CXCR4	20748.5	-0.450442	0.145395	-3.09806	0.00194792	0.016319	1.84035	BLOOD
ANKRD44	4167.24	0.774148	0.250207	3.09403	0.0019746	0.0165272	1.82762	BLOOD
SERPINE1	117.739	-4.54072	1.46781	-3.09355	0.0019778	0.0307034	0.801994	BLOOD
CASK	448.154	2.63262	0.851602	3.09137	0.00199235	0.0269682	0.979283	BLOOD
C11orf95	60.0435	4.91618	1.59227	3.08752	0.00201836	0.0317867	0.781597	BLOOD
AC058791.1	1138.14	1.11504	0.361178	3.08723	0.00202032	0.0167583	1.84035	BLOOD
RBM34	86.55	-5.12734	1.662	-3.08504	0.00203525	0.0338578	0.732799	BLOOD
EIF5A	1740.97	-0.992079	0.321578	-3.08503	0.0020353	0.0175299	1.76003	BLOOD
FCRL3	575.304	2.10056	0.681377	3.08282	0.00205053	0.0240276	1.18766	BLOOD
TRIP12	1493.15	0.941803	0.305535	3.08247	0.0020529	0.0124529	2.77365	BLOOD
CLUH	62.9054	4.0185	1.30411	3.0814	0.0020603	0.0339541	0.732799	BLOOD
CUL3	598.376	1.05931	0.343996	3.07944	0.0020739	0.0275666	0.979283	BLOOD
TPST2	1136.77	1.16509	0.378386	3.0791	0.00207628	0.0171502	1.84035	BLOOD
ETV1	235.454	-3.76318	1.22241	-3.07848	0.00208056	0.0318968	0.801994	BLOOD
MKRN1	1209.94	0.890874	0.289465	3.07765	0.00208638	0.019124	1.61771	BLOOD
CCDC120	55.2204	4.83566	1.57194	3.07623	0.00209633	0.0338787	0.751891	BLOOD
MT-ND6	9984.95	0.683197	0.222121	3.07579	0.00209944	0.017982	1.76003	BLOOD
LEPROTL1	3739.35	-0.552319	0.179669	-3.07409	0.00211148	0.018053	1.76003	BLOOD
C7orf50	481.241	-1.38504	0.450685	-3.07319	0.00211781	0.0240859	1.22107	BLOOD
PLEK	630.238	1.84993	0.602213	3.07188	0.00212717	0.0325744	0.801994	BLOOD
SERINC5	2645.05	0.892764	0.290989	3.06803	0.00215474	0.0176839	1.84451	BLOOD
L3MBTL1	60.555	3.97664	1.29653	3.06715	0.00216107	0.0346336	0.751891	BLOOD
SYNE2	5809.53	0.838109	0.273623	3.063	0.00219127	0.0179743	1.84035	BLOOD
DCXR	849.047	-1.2508	0.408491	-3.06199	0.00219869	0.01997	1.61771	BLOOD
PTCD3	1697.43	1.21697	0.397664	3.06028	0.00221129	0.0131292	2.77365	BLOOD
LMBR1	459.147	-1.20507	0.394079	-3.05794	0.00222868	0.0289987	0.979283	BLOOD
NKTR	4881.18	0.474381	0.155197	3.05665	0.00223829	0.0182174	1.84451	BLOOD
PTMS	366.476	-2.0639	0.676028	-3.05298	0.00226584	0.031261	0.897104	BLOOD
TCF25	2189.28	-0.792721	0.259989	-3.04905	0.00229567	0.0192882	1.76003	BLOOD
ELF1	4288.97	-0.586155	0.192268	-3.04863	0.00229887	0.0188088	1.82762	BLOOD
GCSAM	814.582	1.7094	0.560775	3.04827	0.0023016	0.0206917	1.61771	BLOOD
CDK2AP2	1431.54	-0.884286	0.290221	-3.04693	0.00231188	0.0136028	2.77365	BLOOD
GCN1	834.763	1.26653	0.415831	3.04578	0.00232077	0.0188273	1.84035	BLOOD
LAMA2	119.635	4.20899	1.38233	3.04486	0.0023279	0.0399741	0.667678	BLOOD
ANAPC7	613.007	1.55595	0.51103	3.04472	0.00232896	0.0299524	0.979283	BLOOD
EPOR	167.879	-2.25101	0.739422	-3.04429	0.00233231	0.0570208	0.408145	BLOOD
ASB3	64.8649	-6.00267	1.97252	-3.04315	0.00234112	0.0355457	0.781597	BLOOD
SRD5A1	99.6831	3.08683	1.01527	3.04041	0.00236257	0.0355969	0.781597	BLOOD
COPB1	2397.85	0.686938	0.225984	3.03976	0.00236764	0.0191026	1.84035	BLOOD
NOTCH2	468.939	1.7894	0.58878	3.03916	0.00237235	0.035331	0.801994	BLOOD
RABAC1	621.55	-1.11895	0.368304	-3.03812	0.00238058	0.0260962	1.22107	BLOOD
DOLK	67.2989	5.02583	1.65478	3.03716	0.00238817	0.0378437	0.732799	BLOOD
POLD4	519.495	-1.15885	0.381711	-3.03594	0.00239788	0.0355457	0.801994	BLOOD
TSPYL1	2603.64	-0.602117	0.198464	-3.03389	0.00241421	0.0140781	2.77365	BLOOD
PADI4	64.7818	4.51938	1.49065	3.03182	0.00243082	0.0376622	0.751891	BLOOD
ID1	307.091	-8.11969	2.67883	-3.03106	0.00243696	0.0309116	0.979283	BLOOD
SRRT	2109.76	-0.746072	0.24621	-3.03022	0.00244373	0.0195652	1.84451	BLOOD
MAF	788.556	-1.1017	0.363772	-3.02855	0.00245734	0.0206917	1.72544	BLOOD
TOX	604.784	-1.60107	0.529123	-3.02589	0.00247904	0.0273339	1.18766	BLOOD
ADNP	1494.42	1.05373	0.348353	3.02488	0.00248732	0.0144186	2.77365	BLOOD
HSD17B4	556.776	1.75514	0.580243	3.02484	0.00248766	0.0273868	1.18766	BLOOD
WBP1L	503.521	1.85318	0.612809	3.02407	0.00249397	0.0269898	1.22107	BLOOD
ALKBH7	548.701	-1.09119	0.360895	-3.02356	0.00249822	0.0269898	1.22107	BLOOD
RHOC	470.845	-1.37422	0.454564	-3.02316	0.00250153	0.0269898	1.22107	BLOOD
KLRG1	1504.07	1.14604	0.379096	3.02308	0.00250219	0.01997	1.84035	BLOOD
HIST1H2BH	55.2276	-5.01488	1.65944	-3.02202	0.00251092	0.0386135	0.751891	BLOOD
METRNL	123.971	-3.88806	1.2873	-3.02032	0.00252508	0.0368761	0.801994	BLOOD
IPO5	604.81	1.3626	0.451259	3.01956	0.00253143	0.0405399	0.712913	BLOOD
MRPS24	158.96	-1.87358	0.621342	-3.01538	0.00256661	0.0429849	0.667678	BLOOD
CTNNAL1	172.612	-4.25522	1.41163	-3.0144	0.00257491	0.0374623	0.801994	BLOOD
KLC1	172.612	-4.25522	1.41163	-3.0144	0.00257491	0.0430224	0.667678	BLOOD
SUB1	2935.07	-0.731077	0.242553	-3.01409	0.00257752	0.0204419	1.84451	BLOOD
ANKFY1	743.326	1.43393	0.475905	3.01306	0.00258624	0.0226549	1.61771	BLOOD
AMBRA1	390.432	2.51827	0.835961	3.01243	0.00259168	0.0347345	0.897104	BLOOD
NPAT	2042.01	0.940625	0.3124	3.01097	0.00260417	0.0206721	1.84035	BLOOD
ERVK3-1	183.267	-1.90267	0.632147	-3.00986	0.00261372	0.0613251	0.408145	BLOOD
SQSTM1	2571.06	-0.964646	0.320777	-3.00722	0.00263649	0.0208781	1.82762	BLOOD
ATXN7	194.076	-1.96584	0.654281	-3.00458	0.00265946	0.0384245	0.801994	BLOOD
HIST1H2BB	33.2804	-6.2692	2.08694	-3.00402	0.00266437	0.199311	0.0776153	BLOOD
NOL11	674.542	1.38363	0.460724	3.00316	0.00267192	0.0333583	0.979283	BLOOD
SERTAD1	830.423	-1.73714	0.578467	-3.003	0.00267331	0.023266	1.61771	BLOOD
TLN1	2957.98	0.870781	0.290165	3.00099	0.00269105	0.0210869	1.84451	BLOOD
SBF1	602.745	1.43464	0.478095	3.00075	0.00269315	0.0387873	0.801994	BLOOD
PTPN6	2429.11	0.754499	0.251563	2.99925	0.00270645	0.0212273	1.84035	BLOOD
UBIAD1	938.359	1.19454	0.398283	2.99922	0.00270668	0.0223322	1.72426	BLOOD
EGR2	108.889	-4.64144	1.54763	-2.99906	0.00270815	0.0389206	0.801994	BLOOD
ZNF671	361.452	2.43696	0.812938	2.99772	0.00272006	0.0356659	0.897104	BLOOD
CALCOCO1	1229.62	1.00955	0.336855	2.99699	0.00272658	0.0213285	1.84035	BLOOD
NDRG3	1028.99	1.05039	0.350616	2.99584	0.00273691	0.0236966	1.61771	BLOOD
FXYD7	93.0745	-2.66975	0.891202	-2.99567	0.0027384	0.0420896	0.732799	BLOOD
TPR	4494.59	0.606467	0.202509	2.99477	0.00274649	0.0216053	1.82762	BLOOD
PPP1R3E	398.412	2.16622	0.723386	2.99455	0.00274849	0.0506767	0.567907	BLOOD
NAE1	1339.62	0.980676	0.327514	2.9943	0.00275074	0.0155769	2.77365	BLOOD
DENND5A	469.237	2.53135	0.84541	2.99423	0.00275135	0.0430224	0.712913	BLOOD
SNX27	783.613	1.7695	0.592027	2.98888	0.00279999	0.0218448	1.84035	BLOOD
PCBP1	2413.46	-0.672139	0.224952	-2.98793	0.00280878	0.0158142	2.77365	BLOOD
TRIM65	67.8466	3.74598	1.25387	2.98753	0.00281241	0.0408413	0.781597	BLOOD
CDK17	1360.18	-0.950019	0.318014	-2.98736	0.00281402	0.0218471	1.84451	BLOOD
RGL2	893.989	1.16473	0.390022	2.98631	0.0028237	0.0219141	1.84035	BLOOD
TMCC1	322.511	1.9226	0.644526	2.98297	0.00285466	0.0405817	0.801994	BLOOD
DPYSL2	268.944	2.46564	0.827174	2.98081	0.00287491	0.0407553	0.801994	BLOOD
TPBG	31.7936	7.36426	2.47133	2.97988	0.00288361	0.19144	0.0903516	BLOOD
SLA	3563.28	-0.6597	0.2214	-2.97967	0.00288558	0.0222938	1.84451	BLOOD
RASA3	1994.59	0.865673	0.290716	2.97773	0.00290392	0.0232595	1.76003	BLOOD
AFF3	305.227	3.71349	1.248	2.97556	0.00292457	0.0528603	0.567907	BLOOD
LMBRD1	900.431	-0.917931	0.30852	-2.97528	0.00292725	0.0237272	1.72544	BLOOD
LSM2	551.873	-1.14244	0.384067	-2.97457	0.00293396	0.0301568	1.22107	BLOOD
NSD1	1206.22	1.25201	0.420947	2.97428	0.00293681	0.0237339	1.72426	BLOOD
RAP1GAP2	232.03	3.71251	1.24842	2.97376	0.00294176	0.0423484	0.781597	BLOOD
ZSWIM1	95.3752	-4.35671	1.46544	-2.97297	0.00294929	0.0442403	0.732799	BLOOD
IKZF1	4202.31	0.520736	0.175202	2.9722	0.00295673	0.0227373	1.84035	BLOOD
LAPTM5	11788.9	-0.45177	0.152029	-2.9716	0.00296248	0.0227417	1.84035	BLOOD
DPYD	1049.77	1.01283	0.341126	2.96908	0.00298696	0.0246753	1.65168	BLOOD
NPRL2	1063.05	1.46286	0.492782	2.96858	0.00299183	0.0240859	1.72426	BLOOD
AHI1	1030.97	-1.3931	0.469541	-2.96693	0.00300785	0.0241367	1.72544	BLOOD
BOLA3	222.956	-1.67719	0.5658	-2.96429	0.00303387	0.0431827	0.781597	BLOOD
HLA-DQA2	266.939	-3.22875	1.08927	-2.96414	0.00303532	0.0450203	0.732799	BLOOD
AVPI1	108.143	-3.73125	1.25956	-2.96235	0.00305298	0.0445212	0.751891	BLOOD
PDZD8	505.707	-1.10676	0.374038	-2.95894	0.00308696	0.0429969	0.801994	BLOOD
IL1R2	176.064	-7.93149	2.68062	-2.95883	0.00308808	0.0489264	0.667678	BLOOD
SPN	1073.24	-0.882707	0.298416	-2.95797	0.00309671	0.0246469	1.72426	BLOOD
ACAA1	164.766	-4.23285	1.43404	-2.95168	0.00316046	0.0465506	0.732799	BLOOD
CAMK4	2674.03	1.13024	0.38296	2.95133	0.00316411	0.0173171	2.77365	BLOOD
MCM9	402.147	1.60013	0.542418	2.94998	0.0031779	0.0562645	0.567907	BLOOD
ELL	348.829	-1.72692	0.585542	-2.94927	0.00318528	0.0439149	0.801994	BLOOD
SGSM2	545.933	2.57855	0.875172	2.94633	0.00321567	0.0441543	0.801994	BLOOD
HEG1	206.293	2.01537	0.684085	2.94607	0.00321836	0.0447997	0.781597	BLOOD
MAP3K1	1324.45	1.09101	0.370376	2.94568	0.00322242	0.0243817	1.82762	BLOOD
HIGD2A	1019.62	-0.812341	0.275887	-2.94447	0.00323509	0.0253152	1.72544	BLOOD
CCND3	3842.66	0.63042	0.214379	2.94068	0.00327492	0.0244897	1.84451	BLOOD
ATP1B3	1375.57	-0.971068	0.330257	-2.94034	0.00327854	0.0246469	1.82762	BLOOD
ACVR2A	281.228	3.40665	1.1589	2.93955	0.00328692	0.0446351	0.801994	BLOOD
GLG1	4747.84	0.718139	0.244359	2.93887	0.00329412	0.0253022	1.76003	BLOOD
HLA-E	22883.4	-0.428417	0.14581	-2.93818	0.00330145	0.0246753	1.82762	BLOOD
SEC31A	2642.6	0.648133	0.220686	2.9369	0.00331512	0.0246753	1.84035	BLOOD
ZNF518A	493.846	1.86547	0.635279	2.93646	0.00331978	0.0338787	1.18766	BLOOD
MLLT6	1761.13	0.696143	0.237152	2.93543	0.00333081	0.018053	2.77365	BLOOD
QARS	1804.82	1.40999	0.480422	2.9349	0.00333653	0.0246753	1.84451	BLOOD
NSMF	101.889	2.65179	0.903709	2.93434	0.00334254	0.0477453	0.751891	BLOOD
ZIK1	118.244	2.90292	0.989484	2.93377	0.00334867	0.0452922	0.801994	BLOOD
MARS	1535.35	0.830835	0.283278	2.93293	0.00335783	0.0256636	1.76003	BLOOD
SRRM2	6555.52	0.958047	0.326681	2.93266	0.00336067	0.0250141	1.82762	BLOOD
BTN3A2	3322.42	0.606633	0.207175	2.92811	0.00341026	0.0252882	1.82762	BLOOD
TTC30B	70.0189	-5.66498	1.93539	-2.92705	0.00342198	0.0483681	0.751891	BLOOD
DCLRE1A	69.546	4.12811	1.41038	2.92696	0.00342295	0.0483681	0.751891	BLOOD
GPX4	1766.77	-0.738501	0.252336	-2.92666	0.00342628	0.0252057	1.84451	BLOOD
RPL13A	15597.1	-0.410465	0.14027	-2.92625	0.00343074	0.0260962	1.76003	BLOOD
GFM1	989.571	1.19336	0.407985	2.92501	0.0034445	0.0253022	1.84035	BLOOD
AKR1B1	901.391	1.03029	0.352254	2.92484	0.00344634	0.0273339	1.65168	BLOOD
CXXC1	889.742	1.23459	0.422315	2.92338	0.00346258	0.0273868	1.65168	BLOOD
USP34	2117.77	0.715342	0.244838	2.92169	0.00348137	0.0256556	1.82762	BLOOD
ADARB1	360.486	1.7626	0.603421	2.92102	0.00348893	0.0405817	0.979283	BLOOD
HERC1	2690.58	0.683162	0.234023	2.91921	0.00350917	0.0257647	1.82762	BLOOD
PUS10	108.888	3.34035	1.14453	2.91854	0.00351671	0.0480392	0.781597	BLOOD
PXN	1365.36	1.08914	0.373182	2.91853	0.00351688	0.0256743	1.84035	BLOOD
MAP4K5	616.428	-1.36008	0.466347	-2.91646	0.00354031	0.034821	1.22107	BLOOD
MAP2K6	377.246	1.86489	0.639806	2.91477	0.00355946	0.0411952	0.979283	BLOOD
FSCN1	59.5609	-5.58628	1.91795	-2.91263	0.00358395	0.0486708	0.781597	BLOOD
RAB4B	102.047	-4.47136	1.5354	-2.91217	0.00358922	0.0546735	0.667678	BLOOD
HS1BP3	55.5766	3.88128	1.33282	2.91208	0.00359031	0.0546735	0.667678	BLOOD
CD47	4438.14	0.592908	0.203619	2.91185	0.00359291	0.0191817	2.77365	BLOOD
ZNF195	841.614	1.1782	0.405071	2.90862	0.00363025	0.0288306	1.61771	BLOOD
TNFAIP8L2	575.301	1.70271	0.585667	2.9073	0.00364564	0.0526745	0.712913	BLOOD
EGR1	833.675	-2.34194	0.805558	-2.90722	0.00364653	0.0288948	1.61771	BLOOD
SSBP2	855.155	2.33456	0.803716	2.90471	0.00367592	0.0289878	1.61771	BLOOD
PTPN4	1547.49	0.836751	0.288446	2.90089	0.00372102	0.0268108	1.84451	BLOOD
TTC14	1582.36	1.04496	0.360228	2.90082	0.00372182	0.0268108	1.84451	BLOOD
GHITM	3521.03	0.568469	0.196171	2.89783	0.00375759	0.0269898	1.84035	BLOOD
KDM3B	746.148	1.14065	0.393651	2.89763	0.00375996	0.0282157	1.72426	BLOOD
SIVA1	938.296	-0.855385	0.295274	-2.89692	0.00376852	0.0269898	1.84035	BLOOD
JMJD6	1006.3	-0.906947	0.313381	-2.89407	0.00380287	0.0271907	1.84035	BLOOD
RPS10	391.603	-1.48401	0.512936	-2.89317	0.00381372	0.0460217	0.897104	BLOOD
TRAC	10159.6	0.661908	0.228824	2.89265	0.00382009	0.0272193	1.84451	BLOOD
SYNGR3	27.856	-5.87776	2.03272	-2.89157	0.00383326	0.22042	0.0945096	BLOOD
TMEM123	5196.26	0.497034	0.171898	2.89144	0.00383479	0.020254	2.77365	BLOOD
DIMT1	922.648	1.21219	0.419281	2.89112	0.00383871	0.0286558	1.72426	BLOOD
SETD2	1712.08	0.740997	0.25634	2.89068	0.00384409	0.0273339	1.84451	BLOOD
NFKBIB	195.344	-2.35514	0.815126	-2.8893	0.00386105	0.0515281	0.781597	BLOOD
GIMAP2	1407.04	0.892309	0.308849	2.88915	0.00386289	0.0283561	1.76003	BLOOD
ING2	209.486	-1.71755	0.594493	-2.8891	0.00386351	0.057332	0.667678	BLOOD
MSL1	1242.89	0.943894	0.326815	2.88816	0.00387498	0.0296853	1.65168	BLOOD
RSRC2	1975.92	-0.788865	0.2732	-2.8875	0.00388311	0.0274361	1.84451	BLOOD
EIF4E3	561.014	1.35897	0.470664	2.88735	0.00388497	0.0551489	0.712913	BLOOD
RWDD1	866.194	-0.966119	0.33471	-2.88644	0.00389633	0.0288948	1.72544	BLOOD
ACBD3	192.845	2.52785	0.875939	2.88587	0.00390328	0.0576594	0.667678	BLOOD
ILF2	2253.4	0.69695	0.241515	2.88574	0.00390496	0.0275866	1.84035	BLOOD
ATF7IP	4098.77	0.664909	0.230571	2.88374	0.00392977	0.0277288	1.84035	BLOOD
CD6	3374.29	-0.577865	0.200391	-2.88368	0.00393055	0.0206725	2.77365	BLOOD
FBXO25	465.722	1.11678	0.387967	2.87854	0.00399526	0.0445212	0.979283	BLOOD
CHIC2	939.638	-0.838473	0.291285	-2.87853	0.00399536	0.0302552	1.65168	BLOOD
ABHD15	365.673	1.45557	0.505843	2.87751	0.00400822	0.0553029	0.732799	BLOOD
TAZ	937.601	1.23347	0.428812	2.87648	0.00402141	0.0295791	1.72426	BLOOD
MT-CO1	110303	0.349369	0.121558	2.8741	0.00405182	0.0283561	1.84451	BLOOD
FGR	75.9143	3.93018	1.36773	2.87351	0.00405935	0.0530545	0.781597	BLOOD
HMGN2	1625.47	-0.98372	0.342593	-2.8714	0.0040866	0.0286301	1.84035	BLOOD
CSNK2A2	997.003	2.1707	0.755974	2.8714	0.00408663	0.0298845	1.72426	BLOOD
ZBTB4	634.931	1.54565	0.538321	2.87124	0.00408865	0.0570312	0.712913	BLOOD
PIK3AP1	252.934	2.44949	0.853243	2.8708	0.00409431	0.0597762	0.667678	BLOOD
RAB1B	811.718	-0.902281	0.314531	-2.86865	0.00412222	0.0314372	1.61771	BLOOD
KANSL3	818.819	1.08613	0.378702	2.86802	0.00413044	0.0309929	1.65168	BLOOD
SSR4	2358.66	-0.850776	0.296691	-2.86755	0.00413662	0.0289082	1.82762	BLOOD
ABCA7	540.409	1.60707	0.560549	2.86696	0.00414431	0.0574398	0.712913	BLOOD
HLA-DRB5	898.133	-2.06393	0.719991	-2.8666	0.00414906	0.0301661	1.72426	BLOOD
COPS7A	452.926	1.56974	0.547625	2.86645	0.00415098	0.0529718	0.801994	BLOOD
NUP107	918.218	1.32029	0.460692	2.86587	0.00415862	0.0288948	1.84035	BLOOD
NDUFS2	1489.51	1.03553	0.361361	2.86563	0.00416184	0.0288948	1.84451	BLOOD
PYCARD	379.461	-1.30002	0.454334	-2.86138	0.00421807	0.0495201	0.897104	BLOOD
MRPS6	1162.01	-0.717786	0.251016	-2.85952	0.00424285	0.0306501	1.72544	BLOOD
ANKS1A	87.368	3.97948	1.39168	2.85948	0.00424341	0.0538975	0.801994	BLOOD
SGPP2	134.423	-3.03118	1.06027	-2.85888	0.00425135	0.0869542	0.408145	BLOOD
RASGEF1B	404.898	-1.18297	0.414028	-2.85723	0.00427358	0.0470091	0.979283	BLOOD
BORCS5	717.602	-0.957134	0.335217	-2.85527	0.00430004	0.0309214	1.72544	BLOOD
COG1	629.706	1.20934	0.423828	2.85338	0.00432568	0.0547884	0.801994	BLOOD
OTUB2	39.6125	-4.78796	1.67853	-2.85246	0.00433816	0.270522	0.0776153	BLOOD
NUP62CL	74.2328	5.12015	1.79588	2.85105	0.00435747	0.056159	0.781597	BLOOD
CSF2	46.9716	-5.7578	2.02032	-2.84995	0.00437267	0.834514	0.0100266	BLOOD
MGAT4A	2861.08	0.825832	0.289834	2.84933	0.00438115	0.0224421	2.77365	BLOOD
SLC2A8	100.147	-3.98289	1.39796	-2.84908	0.00438457	0.0586937	0.732799	BLOOD
ATRN	66.2262	3.60288	1.26563	2.84671	0.0044174	0.0628034	0.667678	BLOOD
STX7	281.985	2.20975	0.776841	2.84454	0.00444757	0.0516637	0.897104	BLOOD
LMNB1	246.554	-2.67675	0.941477	-2.84314	0.00446717	0.0594774	0.732799	BLOOD
ZNF580	156.133	-2.22311	0.78214	-2.84235	0.00447829	0.0570312	0.781597	BLOOD
GTF3C2	696.709	1.33191	0.46888	2.84062	0.0045026	0.0333583	1.65168	BLOOD
MRPS36	289.966	-1.39189	0.490234	-2.83923	0.00452222	0.0489264	0.979283	BLOOD
PLPP1	390.365	-2.26778	0.798738	-2.83921	0.00452259	0.0520857	0.897104	BLOOD
MDN1	1223.39	0.845888	0.297938	2.83914	0.0045235	0.0338787	1.61771	BLOOD
TUBA4A	4405.2	-0.631886	0.222602	-2.83864	0.00453066	0.0308286	1.82762	BLOOD
MED27	231.814	-1.5086	0.532328	-2.83397	0.00459734	0.0606121	0.732799	BLOOD
ATP2A3	994.365	0.900643	0.317947	2.83268	0.00461593	0.0338787	1.65168	BLOOD
EXOSC10	1588.59	0.78473	0.277058	2.83237	0.00462048	0.031261	1.82762	BLOOD
HECTD4	619.466	1.35731	0.479286	2.83195	0.00462653	0.0432483	1.18766	BLOOD
H2AFX	360.655	-2.14297	0.757198	-2.83014	0.00465279	0.0573765	0.801994	BLOOD
ZNF611	699.341	1.64719	0.58212	2.82964	0.00466011	0.0346735	1.61771	BLOOD
HIST1H2BN	241.708	-2.26021	0.800433	-2.82374	0.00474673	0.0593458	0.781597	BLOOD
KAT2B	965.123	1.16587	0.413376	2.82035	0.00479712	0.0353794	1.61771	BLOOD
CEP41	295.902	2.35665	0.835796	2.81964	0.0048077	0.051308	0.979283	BLOOD
TRMT10C	702.896	-1.04239	0.369881	-2.81818	0.00482961	0.0338787	1.72544	BLOOD
CD37	3750.33	-0.560223	0.199026	-2.81483	0.00488035	0.0338578	1.76003	BLOOD
CHMP4A	170.327	-1.99223	0.707892	-2.81432	0.00488807	0.0604752	0.781597	BLOOD
POMGNT2	62.5585	4.17931	1.48517	2.81404	0.00489233	0.0676646	0.667678	BLOOD
TUBB2A	248.593	-2.49927	0.888638	-2.81247	0.00491623	0.0606617	0.781597	BLOOD
FSTL4	46.9379	-5.04062	1.79366	-2.81025	0.0049503	0.292747	0.0776153	BLOOD
PRKCQ	1453.3	1.23354	0.43902	2.80975	0.00495798	0.0329375	1.84451	BLOOD
C1GALT1C1	546.926	2.34603	0.835333	2.80849	0.00497739	0.0445212	1.22107	BLOOD
ZNF317	457.946	1.74055	0.62063	2.80449	0.00503956	0.0606559	0.801994	BLOOD
SELPLG	4739.28	0.569848	0.203214	2.80418	0.00504447	0.0247714	2.77365	BLOOD
SPATA2	71.5597	3.30782	1.17987	2.80356	0.00505425	0.0690244	0.667678	BLOOD
DPEP2	348.71	2.39073	0.853248	2.80191	0.00508004	0.0566668	0.897104	BLOOD
TBCK	424.177	1.70649	0.609091	2.8017	0.00508342	0.0608057	0.801994	BLOOD
CENPN	76.1395	-3.38964	1.20996	-2.80145	0.00508728	0.0650478	0.732799	BLOOD
VDAC2	847.249	-1.09369	0.390549	-2.80039	0.00510416	0.0369145	1.61771	BLOOD
CPNE1	3040.36	0.592608	0.211717	2.79905	0.00512525	0.0338578	1.84451	BLOOD
HIF1A	2581.66	-0.758368	0.270986	-2.79855	0.0051333	0.0338787	1.84035	BLOOD
N4BP2L2	5303.15	0.669606	0.239399	2.79703	0.00515746	0.0351155	1.76003	BLOOD
PDE7A	2125.01	0.948925	0.339383	2.79603	0.00517352	0.035186	1.76003	BLOOD
ZYG11B	261.25	2.79483	1.00016	2.79438	0.00519994	0.0573765	0.897104	BLOOD
FAM107B	3240.67	-0.494477	0.17699	-2.79381	0.00520914	0.0343832	1.82762	BLOOD
TXN	1038.18	-0.95588	0.342193	-2.79339	0.00521583	0.0355969	1.72544	BLOOD
ZCCHC3	127.061	3.11819	1.11664	2.79247	0.00523076	0.0661411	0.732799	BLOOD
ZFAND5	1891.49	-0.638334	0.228591	-2.79247	0.00523076	0.0353805	1.76003	BLOOD
SNRNP40	913.95	1.4027	0.502574	2.79104	0.00525391	0.0377537	1.61771	BLOOD
SETD1B	340.987	1.61406	0.578339	2.79085	0.00525697	0.0799139	0.567907	BLOOD
PPP1CB	3360.1	-0.52798	0.189247	-2.7899	0.00527245	0.0355457	1.76003	BLOOD
ITGAV	143.262	-1.85068	0.663709	-2.78839	0.00529713	0.0639747	0.781597	BLOOD
ZNF367	64.0917	3.56146	1.27749	2.78786	0.00530569	0.0628034	0.801994	BLOOD
TRIM13	839.626	1.28482	0.460863	2.78786	0.00530573	0.0374623	1.65168	BLOOD
GOLGA4	2303.91	0.595848	0.213735	2.78778	0.00530703	0.0355969	1.76003	BLOOD
CENPF	162.139	-2.28769	0.821302	-2.78545	0.00534542	0.0643177	0.781597	BLOOD
KMT2A	3095.67	0.74554	0.267928	2.78261	0.00539234	0.0350718	1.84451	BLOOD
FHIT	317.005	2.26926	0.81567	2.78208	0.00540114	0.0589534	0.897104	BLOOD
MMS19	1048.84	1.12364	0.403999	2.78129	0.00541434	0.0368175	1.72426	BLOOD
MLF1	42.4783	-5.82562	2.09615	-2.7792	0.00544927	0.312125	0.0776153	BLOOD
TMED5	1093.37	-0.984081	0.354234	-2.77806	0.00546853	0.0353805	1.84035	BLOOD
NCR3	621.813	1.32644	0.477812	2.77607	0.00550207	0.0644482	0.801994	BLOOD
RCAN3	2424.73	0.791944	0.285402	2.77484	0.00552288	0.0368175	1.76003	BLOOD
OCIAD2	1627.44	-0.717776	0.258739	-2.77413	0.00553489	0.0355698	1.84035	BLOOD
REL	1101.19	-1.21418	0.438642	-2.76805	0.00563926	0.039228	1.65168	BLOOD
XPO7	519.64	2.15116	0.777647	2.76624	0.00567075	0.049054	1.22107	BLOOD
PPIE	979.368	1.41343	0.511177	2.76505	0.0056914	0.0402517	1.61771	BLOOD
SLC35B4	379.062	2.43031	0.879058	2.76468	0.00569791	0.0660397	0.801994	BLOOD
CD3D	8138.96	-0.453581	0.164067	-2.76461	0.00569911	0.0363056	1.84451	BLOOD
FAIM	74.9798	3.28533	1.18912	2.76283	0.00573027	0.0693203	0.751891	BLOOD
SNX4	527.721	1.42907	0.517578	2.76107	0.00576115	0.049643	1.22107	BLOOD
SPAG4	80.6085	-3.94055	1.428	-2.75949	0.00578908	0.069917	0.751891	BLOOD
MTMR4	645.322	1.19505	0.43337	2.75757	0.00582329	0.0731915	0.712913	BLOOD
XRCC5	4137.82	0.598658	0.217118	2.7573	0.00582817	0.0370116	1.84035	BLOOD
RNF43	50.8444	3.78081	1.373	2.75369	0.00589273	0.0689971	0.781597	BLOOD
MIR155HG	222.596	-2.49639	0.906767	-2.75306	0.00590408	0.0775091	0.667678	BLOOD
PARK7	2368.12	-0.550041	0.199985	-2.7504	0.00595217	0.038938	1.76003	BLOOD
ATG2B	832.841	1.07766	0.391985	2.74923	0.00597346	0.0377537	1.84035	BLOOD
CCT8	2148.24	0.70357	0.25612	2.74703	0.00601367	0.0281211	2.77365	BLOOD
HUWE1	1591.2	1.06561	0.388134	2.74547	0.00604246	0.0380858	1.84035	BLOOD
SMS	474.255	-1.20398	0.438582	-2.74515	0.00604824	0.0689971	0.801994	BLOOD
ARF4	1693.77	-0.838306	0.305409	-2.74487	0.00605351	0.0394755	1.76003	BLOOD
TRIP11	1727.16	0.870107	0.317121	2.74377	0.00607387	0.0384684	1.82762	BLOOD
ARPP19	964.593	-0.754545	0.275177	-2.74204	0.00610594	0.0417678	1.65168	BLOOD
TET1	397.381	2.2277	0.812526	2.74169	0.00611238	0.0693203	0.801994	BLOOD
SLC2A9	40.9114	7.26897	2.65152	2.74143	0.00611717	0.295589	0.0945096	BLOOD
CMIP	189.172	-1.53685	0.560649	-2.74121	0.0061214	0.113916	0.408145	BLOOD
ATMIN	323.05	2.05645	0.750784	2.73907	0.00616141	0.0897171	0.567907	BLOOD
PLAC8	1722.26	1.2184	0.444833	2.73901	0.00616239	0.0401008	1.76003	BLOOD
CAD	468.491	2.3804	0.869619	2.73729	0.0061948	0.060792	0.979283	BLOOD
SNRK	1641.7	0.805586	0.294391	2.73645	0.00621057	0.0390845	1.82762	BLOOD
CYP51A1	140.261	-3.05946	1.11855	-2.73519	0.00623434	0.114894	0.408145	BLOOD
RFC3	69.578	-5.25955	1.92385	-2.73386	0.00625957	0.0757069	0.732799	BLOOD
UHRF1BP1	157.667	2.05245	0.750934	2.7332	0.00627229	0.0757069	0.732799	BLOOD
IPO9	682.13	1.0217	0.374047	2.73149	0.00630492	0.0616003	0.979283	BLOOD
HIST1H4B	26.8846	-5.10125	1.86761	-2.73143	0.00630609	0.310902	0.0903516	BLOOD
MAP1A	159.604	2.18958	0.802066	2.72992	0.00633494	0.0712481	0.801994	BLOOD
MOB3A	1626.01	0.752524	0.275662	2.72988	0.0063357	0.0408413	1.76003	BLOOD
TIMM8B	363.211	-1.32098	0.484472	-2.72663	0.00639843	0.0768761	0.732799	BLOOD
ZNF365	53.1108	5.93596	2.17714	2.7265	0.00640109	0.0768761	0.732799	BLOOD
ZFAS1	1228.55	-0.914669	0.33571	-2.72458	0.00643832	0.0420896	1.72426	BLOOD
RBM6	3130.84	0.824611	0.302665	2.7245	0.00643989	0.0295154	2.77365	BLOOD
NMNAT3	55.8998	4.84742	1.78081	2.72203	0.00648816	0.0775451	0.732799	BLOOD
PAN3	1442.16	1.57711	0.579513	2.72144	0.00649989	0.0403659	1.84035	BLOOD
TNFRSF1B	2120.41	-1.31164	0.482117	-2.72059	0.00651654	0.0417889	1.76003	BLOOD
NFX1	1252.9	1.0215	0.375663	2.71919	0.00654422	0.0426307	1.72544	BLOOD
RFX1	106.635	-2.61664	0.962294	-2.71917	0.00654462	0.0835524	0.667678	BLOOD
PHF3	2481.94	0.703908	0.258874	2.71911	0.00654569	0.0297913	2.77365	BLOOD
USP7	828.019	1.01157	0.37217	2.71804	0.006567	0.0427165	1.72544	BLOOD
HERPUD2	1359.91	-0.870912	0.320478	-2.71754	0.00657696	0.0405817	1.84451	BLOOD
RFX7	440.321	1.56771	0.577385	2.71518	0.00662392	0.0738541	0.801994	BLOOD
ADGRG1	266.289	3.20068	1.17968	2.71317	0.00666432	0.0740919	0.801994	BLOOD
STAT5B	1560.39	0.866698	0.319549	2.71226	0.00668271	0.0301696	2.77365	BLOOD
RABL3	355.245	2.31305	0.85319	2.71106	0.00670685	0.068688	0.897104	BLOOD
COX4I1	5657.48	-0.463262	0.170935	-2.71016	0.00672499	0.041279	1.84451	BLOOD
POLR3E	1223.4	0.833804	0.307687	2.70991	0.00673023	0.0445212	1.65168	BLOOD
DPH5	353.226	2.57741	0.95131	2.70933	0.00674201	0.0688734	0.897104	BLOOD
HSF1	897.283	-0.810109	0.299137	-2.70815	0.00676589	0.0446351	1.65168	BLOOD
UPF3B	775.57	-1.08408	0.40039	-2.70755	0.00677811	0.0416556	1.84035	BLOOD
NCSTN	1043.08	0.904115	0.33435	2.70409	0.00684909	0.0439149	1.72544	BLOOD
HIST1H2AH	49.1268	-5.18844	1.91884	-2.70394	0.00685223	0.360142	0.0776153	BLOOD
RTP4	101.812	4.53275	1.67748	2.70213	0.00688975	0.0773908	0.781597	BLOOD
PYROXD2	251.264	2.59415	0.960096	2.70196	0.00689313	0.0863168	0.667678	BLOOD
PSMC2	1235.07	0.833642	0.308795	2.69966	0.00694107	0.0442403	1.72426	BLOOD
KLHL3	358.93	2.2432	0.831012	2.69936	0.0069474	0.0981286	0.567907	BLOOD
ZNF821	190.656	-2.08358	0.772885	-2.69585	0.00702095	0.124563	0.408145	BLOOD
ARID1A	1802.61	0.811618	0.30108	2.69568	0.00702442	0.0427165	1.84451	BLOOD
PARP4	1279.59	0.863716	0.320469	2.69516	0.00703538	0.0428356	1.84035	BLOOD
CALR	2480.47	-0.66997	0.24875	-2.69335	0.0070738	0.0429282	1.84451	BLOOD
H1FX	425.781	-1.33392	0.495459	-2.69229	0.00709637	0.0993528	0.567907	BLOOD
PCNP	1340.06	-0.801771	0.298059	-2.68998	0.00714572	0.0431424	1.84451	BLOOD
RBM39	7647.9	-0.404952	0.150621	-2.68855	0.00717624	0.0445212	1.76003	BLOOD
TSTD1	1414.67	-0.806626	0.300042	-2.68838	0.00718004	0.0432483	1.84451	BLOOD
IGF1R	398.064	2.32629	0.865978	2.68631	0.00722458	0.0837158	0.732799	BLOOD
NCOA5	552.304	1.63509	0.609216	2.68393	0.00727633	0.0788267	0.801994	BLOOD
TUBA1C	318.732	-1.92095	0.716103	-2.68251	0.00730715	0.0686138	0.979283	BLOOD
FANCF	524.245	1.6835	0.627878	2.68125	0.00733467	0.0687559	0.979283	BLOOD
NKG7	5544.72	-0.702809	0.262168	-2.68076	0.00734552	0.0440428	1.84035	BLOOD
CLK1	4811.79	-0.527846	0.196928	-2.68041	0.00735323	0.0440443	1.84035	BLOOD
KIF9	114.431	-2.29544	0.856744	-2.67926	0.00737847	0.0848362	0.732799	BLOOD
CISD2	375.789	-1.10996	0.414516	-2.67772	0.00741244	0.0738541	0.897104	BLOOD
CLDN15	73.8034	3.74278	1.39825	2.67676	0.00743375	0.0851418	0.732799	BLOOD
WDR3	371.694	2.35487	0.879805	2.67658	0.0074378	0.0739851	0.897104	BLOOD
NIPBL	2150.59	0.874867	0.327193	2.67386	0.00749841	0.0445212	1.84451	BLOOD
ETS1	4047.46	0.688245	0.257477	2.67303	0.00751695	0.0445212	1.84451	BLOOD
TRIB1	133.382	-4.13123	1.54566	-2.67279	0.00752241	0.084623	0.751891	BLOOD
PDLIM7	98.4702	3.09074	1.15655	2.67238	0.00753146	0.0925306	0.667678	BLOOD
NLRP2	118.9	3.61304	1.3524	2.67157	0.00754966	0.0926843	0.667678	BLOOD
NEURL4	70.1864	3.47821	1.30222	2.67098	0.00756311	0.0863168	0.732799	BLOOD
TAF1B	285.526	1.64132	0.614523	2.67089	0.00756505	0.103938	0.567907	BLOOD
PHKB	802.913	0.896204	0.335992	2.66734	0.00764542	0.0496743	1.61771	BLOOD
SH3BP2	439.28	2.56499	0.962328	2.6654	0.00768965	0.0618931	1.18766	BLOOD
NINJ2	193.436	-1.76577	0.662828	-2.664	0.00772176	0.0940876	0.667678	BLOOD
HIST1H2BK	99.3673	-2.12071	0.796399	-2.66288	0.00774755	0.0826759	0.801994	BLOOD
NAA25	652.882	1.59549	0.599308	2.66223	0.00776259	0.062284	1.18766	BLOOD
ZFYVE19	283.76	2.76316	1.03834	2.66114	0.00778766	0.106385	0.567907	BLOOD
CIB1	2320.43	-0.562352	0.211322	-2.66111	0.00778836	0.0339488	2.77365	BLOOD
MFHAS1	670.783	1.45058	0.545122	2.66102	0.00779037	0.0830675	0.801994	BLOOD
MRFAP1L1	1930.57	0.771323	0.290078	2.65902	0.00783685	0.0460217	1.84451	BLOOD
MTDH	2374.11	-0.587088	0.2208	-2.65891	0.00783929	0.0463429	1.82762	BLOOD
B3GNT9	44.1434	6.27383	2.35976	2.65868	0.00784486	0.357195	0.0903516	BLOOD
LDLR	308.461	-1.81438	0.682506	-2.65841	0.0078511	0.107099	0.567907	BLOOD
CASS4	180.896	-1.57714	0.593325	-2.65813	0.00785747	0.0848348	0.781597	BLOOD
TTC16	150.132	2.73816	1.03027	2.65771	0.00786746	0.0848362	0.781597	BLOOD
PBXIP1	4194.94	-0.636349	0.239487	-2.65713	0.00788083	0.0479072	1.76003	BLOOD
PHF20	2243.13	-0.714752	0.269063	-2.65644	0.00789698	0.0479524	1.76003	BLOOD
NCL	5975.68	-0.506061	0.190543	-2.65589	0.00791005	0.0463429	1.84451	BLOOD
ALMS1	303.575	1.5695	0.591247	2.65455	0.00794133	0.107639	0.567907	BLOOD
TTC28	54.8503	3.39534	1.27945	2.65374	0.00796042	0.0853499	0.781597	BLOOD
SGK1	697.15	-1.29382	0.487545	-2.65374	0.00796057	0.0513786	1.61771	BLOOD
CLDN7	41.2286	4.08481	1.53974	2.65292	0.00797986	0.358891	0.0909799	BLOOD
SLC25A29	42.7599	4.58957	1.73004	2.65287	0.00798108	0.358891	0.0909799	BLOOD
PLEC	2101.54	1.24176	0.468225	2.65205	0.00800042	0.0483681	1.76003	BLOOD
TAF13	220.468	-1.619	0.610628	-2.65136	0.00801676	0.0966776	0.667678	BLOOD
CNTRL	2796.2	0.832286	0.314316	2.64793	0.00809872	0.0473569	1.84035	BLOOD
RNF14	441.463	1.31834	0.498032	2.64709	0.00811878	0.0850963	0.801994	BLOOD
MCM3	1333.76	1.01883	0.384979	2.64645	0.00813411	0.0477535	1.82762	BLOOD
HDDC2	665.171	1.15231	0.435529	2.64576	0.00815074	0.0852335	0.801994	BLOOD
AP1G2	1384.68	0.868157	0.328233	2.64494	0.00817045	0.0352224	2.77365	BLOOD
XCL2	1194.65	-1.87108	0.707734	-2.64377	0.00819893	0.0516794	1.65168	BLOOD
NUP160	1124.61	1.01372	0.38368	2.6421	0.00823949	0.0479072	1.84035	BLOOD
IFT172	130.934	3.26195	1.23485	2.64157	0.00825223	0.0985593	0.667678	BLOOD
FLNA	4086.49	0.571854	0.216509	2.64125	0.00826011	0.0479072	1.84451	BLOOD
MCM7	1171.98	1.0626	0.402547	2.63969	0.0082983	0.0527476	1.61771	BLOOD
ARL6IP5	5779.08	-0.502983	0.190614	-2.63876	0.00832106	0.0482274	1.84035	BLOOD
ZBTB25	1504.07	0.916742	0.347417	2.63873	0.00832163	0.0355612	2.77365	BLOOD
BTBD11	201.805	3.3941	1.28646	2.63832	0.00833172	0.0929853	0.732799	BLOOD
RACGAP1	116.727	3.99653	1.51489	2.63816	0.00833569	0.0912855	0.751891	BLOOD
HINT1	3712.15	-0.491486	0.186306	-2.63806	0.00833823	0.0355698	2.77365	BLOOD
DKC1	1189.63	0.998017	0.378323	2.638	0.00833964	0.0528603	1.61771	BLOOD
PAQR8	579.58	1.63807	0.620972	2.63791	0.00834178	0.0643177	1.22107	BLOOD
ITSN2	3467.62	0.476366	0.180596	2.63774	0.00834605	0.0483247	1.84035	BLOOD
CTPS2	104.194	2.54066	0.963349	2.63732	0.00835651	0.0913751	0.751891	BLOOD
LPXN	3398.31	0.681417	0.258484	2.6362	0.00838398	0.0355969	2.77365	BLOOD
GPD2	114.605	-2.46173	0.934304	-2.63483	0.00841791	0.087268	0.801994	BLOOD
PUM2	2064.84	0.68365	0.25952	2.63428	0.00843154	0.0502594	1.76003	BLOOD
TRA2A	2278.2	-0.608257	0.230979	-2.63339	0.00845384	0.0489264	1.82762	BLOOD
RABEPK	390.783	2.34051	0.889115	2.6324	0.00847837	0.0876452	0.801994	BLOOD
ACIN1	825.908	0.797303	0.303055	2.63089	0.00851624	0.0489264	1.84035	BLOOD
AHCY	223.259	2.11403	0.803615	2.63065	0.00852227	0.0945428	0.732799	BLOOD
RPS4X	17272.8	-0.447892	0.170345	-2.62933	0.00855535	0.0490557	1.84035	BLOOD
PLAT	39.8896	-5.60444	2.13212	-2.62857	0.00857437	0.376182	0.0909799	BLOOD
ESYT2	1105.65	0.920771	0.350299	2.62853	0.00857541	0.0516794	1.72544	BLOOD
PPIA	2904.8	-0.653428	0.248837	-2.62592	0.00864139	0.049501	1.84035	BLOOD
RGS12	64.1634	3.22336	1.22773	2.62546	0.00865309	0.101931	0.667678	BLOOD
ATG16L2	666.182	1.22147	0.46546	2.62421	0.00868504	0.0660397	1.22107	BLOOD
CEPT1	710.989	1.4658	0.558847	2.62291	0.00871832	0.0521906	1.72426	BLOOD
TAOK1	1004.1	0.842988	0.321475	2.62225	0.00873519	0.0522063	1.72544	BLOOD
RSL24D1	1373.19	-0.701466	0.267578	-2.62154	0.00875345	0.0516794	1.76003	BLOOD
TBC1D8	48.6168	3.7295	1.42326	2.62039	0.00878291	0.372858	0.0945096	BLOOD
REEP6	22.4814	-5.93652	2.26555	-2.62034	0.0087842	0.421127	0.0776153	BLOOD
NOL9	531.121	1.07456	0.410392	2.61837	0.00883497	0.0685203	1.18766	BLOOD
GTF2A2	1181.59	-0.834035	0.318549	-2.61823	0.00883871	0.0503383	1.84035	BLOOD
SRPK2	1219.8	0.830142	0.317414	2.61533	0.0089142	0.0529609	1.72426	BLOOD
NBR1	1275.38	0.946133	0.3618	2.61507	0.00892095	0.0548134	1.65168	BLOOD
POLR2K	657.455	-1.01549	0.388574	-2.61337	0.00896531	0.0690049	1.18766	BLOOD
TARSL2	836.7	-0.977636	0.374196	-2.61263	0.00898485	0.0510722	1.84035	BLOOD
ERO1B	572.614	-1.37854	0.527754	-2.6121	0.00899892	0.0794578	0.979283	BLOOD
HAVCR2	375.76	-2.3874	0.91401	-2.61201	0.0090012	0.0921364	0.801994	BLOOD
MFSD9	127.292	3.88559	1.48777	2.61168	0.0090098	0.0940516	0.781597	BLOOD
SPATA5	385.422	1.5596	0.597808	2.60886	0.00908452	0.118404	0.567907	BLOOD
TES	2880.08	0.622055	0.238523	2.60794	0.00910882	0.0516909	1.82762	BLOOD
NUCB2	1901.31	0.664492	0.254826	2.60763	0.00911721	0.0516909	1.82762	BLOOD
NMT2	1397.97	0.78888	0.302568	2.60728	0.00912637	0.0516909	1.82762	BLOOD
TNPO3	700.011	1.23694	0.474447	2.60711	0.00913091	0.0557909	1.65168	BLOOD
NDUFA12	1364.67	-0.851042	0.326562	-2.60606	0.00915898	0.0518262	1.82762	BLOOD
H1F0	50.8175	5.72187	2.1957	2.60595	0.00916197	0.0978148	0.751891	BLOOD
EIF2D	771.553	1.12862	0.433231	2.60513	0.009184	0.0516909	1.84035	BLOOD
FCF1	157.447	-1.88195	0.722453	-2.60494	0.00918892	0.0935632	0.801994	BLOOD
NDUFC2	523.722	-1.25251	0.481345	-2.6021	0.00926551	0.0940876	0.801994	BLOOD
CEBPD	87.6036	2.86208	1.10053	2.60063	0.00930515	0.10743	0.667678	BLOOD
PDAP1	468.864	-1.03851	0.39939	-2.60023	0.00931612	0.102443	0.712913	BLOOD
ZNF207	2331.88	0.684786	0.263387	2.59992	0.00932451	0.0387894	2.77365	BLOOD
ZNF589	510.399	1.82396	0.701666	2.59946	0.00933692	0.0945728	0.801994	BLOOD
LINS1	1185.46	0.993149	0.382075	2.59936	0.00933984	0.0566668	1.65168	BLOOD
SLA2	1296	-0.776632	0.299109	-2.59648	0.00941836	0.0526745	1.84035	BLOOD
RSBN1	1530.41	-0.755245	0.290884	-2.59638	0.00942108	0.0528603	1.82762	BLOOD
ZNF442	235.726	2.26208	0.871297	2.59623	0.00942541	0.0968744	0.781597	BLOOD
TAF1D	1287.13	-0.710558	0.273844	-2.59475	0.00946592	0.0570312	1.65168	BLOOD
GCHFR	203.736	-1.47744	0.569526	-2.59416	0.00948223	0.109052	0.667678	BLOOD
CHD9	1334.96	0.905929	0.349219	2.59416	0.00948228	0.0530499	1.82762	BLOOD
NCF4	336.498	-1.34148	0.517517	-2.59216	0.0095376	0.0831557	0.979283	BLOOD
GPAM	109.833	4.10465	1.58384	2.59158	0.0095536	0.109445	0.667678	BLOOD
ATP11A	249.509	2.68436	1.0359	2.59132	0.00956074	0.0962642	0.801994	BLOOD
OSTM1	922.803	-0.922621	0.35606	-2.5912	0.00956431	0.0559271	1.72426	BLOOD
DLG1	404.622	1.16286	0.449005	2.58987	0.00960123	0.0965665	0.801994	BLOOD
CNBD2	219.86	-3.13394	1.21021	-2.58958	0.00960921	0.0983275	0.781597	BLOOD
VARS	258.411	1.6188	0.625156	2.58944	0.00961322	0.0835524	0.979283	BLOOD
CASP10	456.496	1.70638	0.659261	2.58832	0.00964443	0.0837073	0.979283	BLOOD
TIGD2	57.6036	4.87621	1.88396	2.58828	0.00964574	0.101333	0.751891	BLOOD
LIX1L	567.734	0.917095	0.354353	2.58809	0.00965111	0.10525	0.712913	BLOOD
PTPRE	947.037	-0.766862	0.296322	-2.58793	0.00965537	0.0562645	1.72426	BLOOD
B2M	269067	-0.38845	0.150107	-2.58781	0.00965868	0.053562	1.84035	BLOOD
FSTL3	39.3734	4.51029	1.74364	2.58671	0.00968975	0.405747	0.0909799	BLOOD
SRSF3	5756.72	-0.430568	0.16654	-2.58538	0.00972721	0.05377	1.84451	BLOOD
LAYN	149.148	-3.54352	1.37249	-2.58182	0.00982811	0.104538	0.732799	BLOOD
KCNC4	60.1925	3.46891	1.34367	2.58168	0.00983205	0.104538	0.732799	BLOOD
HOXB3	61.377	3.52137	1.36427	2.58114	0.00984743	0.112179	0.667678	BLOOD
TXK	2534.12	1.21631	0.471296	2.58077	0.00985806	0.0562645	1.76003	BLOOD
ASTE1	1012.73	1.08487	0.420416	2.58047	0.00986663	0.0570208	1.72544	BLOOD
ACYP2	225.361	-1.5068	0.584009	-2.5801	0.00987715	0.158927	0.408145	BLOOD
RPL36A	2970.88	-0.975654	0.378252	-2.57938	0.0098979	0.0549102	1.82762	BLOOD
PLK3	854.873	-1.15425	0.44769	-2.57823	0.00993074	0.0570771	1.72544	BLOOD
C1orf162	1874.51	0.977191	0.379252	2.57663	0.00997687	0.054914	1.84035	BLOOD
CLUAP1	429.803	1.71991	0.668172	2.57405	0.0100515	0.108376	0.712913	BLOOD
RFLNB	696.719	1.63617	0.635823	2.57331	0.0100732	0.0576594	1.72426	BLOOD
GLO1	964.675	0.982177	0.381774	2.57267	0.0100918	0.0576744	1.72426	BLOOD
GSPT2	97.895	2.40171	0.934279	2.57065	0.0101507	0.114869	0.667678	BLOOD
NDFIP2	388.622	-1.76598	0.687191	-2.56986	0.010174	0.107324	0.732799	BLOOD
YME1L1	2337.09	-0.65198	0.253715	-2.56973	0.0101777	0.0557373	1.84451	BLOOD
SF3B4	1159.45	-0.827116	0.321999	-2.56869	0.0102085	0.0601466	1.65168	BLOOD
KANSL1	1624.11	0.832168	0.324151	2.56722	0.0102518	0.0562956	1.82762	BLOOD
TPM4	1568.49	-0.7115	0.27767	-2.5624	0.0103953	0.0579906	1.76003	BLOOD
2023-03-01	38.5825	4.49084	1.75294	2.56189	0.0104105	0.423804	0.0909799	BLOOD
NDUFA11	417.741	-6.8647	2.67956	-2.56187	0.010411	0.109052	0.732799	BLOOD
TMED4	2296.36	0.566427	0.2211	2.56186	0.0104114	0.0566668	1.84035	BLOOD
IFI16	2767.44	-0.646805	0.252631	-2.56027	0.010459	0.0566668	1.84451	BLOOD
UCP2	7604.12	0.486163	0.189897	2.56015	0.0104628	0.0566668	1.84451	BLOOD
KLHL9	956.722	1.06798	0.417163	2.5601	0.0104643	0.0608057	1.65168	BLOOD
TBRG1	1118.81	-0.767103	0.299717	-2.55943	0.0104845	0.0619007	1.61771	BLOOD
KAT6A	1403.95	0.938738	0.366914	2.55847	0.0105134	0.0570771	1.82762	BLOOD
SNRPD3	919.324	1.50449	0.588328	2.55722	0.0105512	0.0612286	1.65168	BLOOD
TSEN54	1361	-0.759329	0.297005	-2.55662	0.0105694	0.0570588	1.84035	BLOOD
ALOX5AP	3513.52	-0.717459	0.280686	-2.55609	0.0105855	0.0589456	1.76003	BLOOD
LSR	320.333	-1.63808	0.640857	-2.55608	0.0105859	0.103287	0.801994	BLOOD
PEX6	136.932	2.31687	0.906865	2.55482	0.0106244	0.118056	0.667678	BLOOD
COX14	720.903	-0.930243	0.364177	-2.55437	0.010638	0.0625317	1.61771	BLOOD
GRAP2	1513.08	0.864043	0.338292	2.55413	0.0106452	0.0591714	1.76003	BLOOD
SERGEF	325.552	1.39445	0.546	2.55394	0.010651	0.13258	0.567907	BLOOD
HMGCS1	442.654	-1.02801	0.402525	-2.55391	0.0106521	0.0781748	1.18766	BLOOD
ZNF395	87.3868	2.87817	1.12732	2.55312	0.0106762	0.11128	0.732799	BLOOD
RPL9	3975.82	-1.80767	0.708433	-2.55165	0.0107215	0.0577552	1.82762	BLOOD
ARL17A	34.7928	-3.20163	1.25507	-2.55096	0.0107426	0.431532	0.0909799	BLOOD
IRAK1BP1	38.7957	4.49605	1.76267	2.55071	0.0107505	0.471067	0.0776153	BLOOD
PGBD4	50.9431	3.78297	1.48401	2.54915	0.0107985	0.112161	0.732799	BLOOD
ERCC3	1244.2	1.15985	0.455169	2.54817	0.0108289	0.0578778	1.84035	BLOOD
PARVG	803.468	1.05071	0.4124	2.5478	0.0108406	0.0578876	1.84035	BLOOD
CMTM6	1639.47	-0.753471	0.295837	-2.54692	0.010868	0.043457	2.77365	BLOOD
SAR1B	917.101	-1.10206	0.432774	-2.54651	0.0108806	0.0606963	1.72426	BLOOD
ACSS1	663.797	1.17347	0.460909	2.54598	0.0108971	0.0794578	1.18766	BLOOD
ACTR3	5854.86	0.382193	0.150138	2.54561	0.0109087	0.0601466	1.76003	BLOOD
TAB2	1160.2	0.81051	0.318632	2.54372	0.0109679	0.0629804	1.65168	BLOOD
UQCRC2	2017.29	0.733011	0.288309	2.54245	0.0110078	0.0439149	2.77365	BLOOD
FASTKD2	608.958	1.98808	0.782084	2.54203	0.0110212	0.0784817	1.22107	BLOOD
HARBI1	159.452	2.36082	0.928793	2.54182	0.0110278	0.170675	0.408145	BLOOD
GET4	104.319	-1.84834	0.727228	-2.54162	0.011034	0.111853	0.751891	BLOOD
NCAPG	47.8076	-5.3587	2.1091	-2.54075	0.0110614	0.439753	0.0909799	BLOOD
LRP8	137.321	2.9722	1.17094	2.5383	0.0111392	0.109163	0.781597	BLOOD
INSIG1	1104.86	-0.874177	0.344429	-2.53804	0.0111474	0.0637881	1.65168	BLOOD
CDC26	276.266	-1.29987	0.512304	-2.53731	0.0111708	0.10743	0.801994	BLOOD
DCHS1	338.462	2.40882	0.949556	2.53679	0.0111875	0.114894	0.732799	BLOOD
SLFN12L	39.6609	-4.27979	1.68854	-2.53461	0.0112573	0.482254	0.0776153	BLOOD
CUTC	714.978	1.01203	0.399486	2.53333	0.0112986	0.0643177	1.65168	BLOOD
UIMC1	782.72	0.986967	0.389649	2.53296	0.0113103	0.065452	1.61771	BLOOD
IPO8	354.292	1.38428	0.546508	2.53296	0.0113104	0.138318	0.567907	BLOOD
CIRBP	4885.06	-0.433121	0.171139	-2.53082	0.0113797	0.0602639	1.82762	BLOOD
PPP1R15B	855.756	-0.811938	0.320876	-2.53038	0.0113938	0.0647476	1.65168	BLOOD
CASP8AP2	1000.08	0.997266	0.394143	2.53021	0.0113993	0.0601466	1.84035	BLOOD
C6orf226	208.215	-1.35807	0.536847	-2.52971	0.0114155	0.109163	0.801994	BLOOD
GSPT1	1427.48	-0.722648	0.285672	-2.52964	0.0114178	0.0601466	1.84035	BLOOD
ENY2	702.06	-0.938605	0.371437	-2.52695	0.0115057	0.0631768	1.72426	BLOOD
IL17RA	795.07	1.09302	0.432551	2.52691	0.0115071	0.0660397	1.61771	BLOOD
LYST	1519.65	-0.7856	0.311109	-2.52516	0.0115647	0.0625317	1.76003	BLOOD
IPCEF1	1978.31	-0.639064	0.253215	-2.5238	0.0116094	0.0606963	1.84035	BLOOD
PLEKHG3	383.505	2.17948	0.863606	2.5237	0.0116126	0.101931	0.897104	BLOOD
VPS13C	2411.47	0.659612	0.261434	2.52305	0.0116341	0.0606963	1.84451	BLOOD
WDR24	173.161	3.11634	1.23531	2.52271	0.0116453	0.177412	0.408145	BLOOD
TUG1	938.493	1.11129	0.440581	2.52234	0.0116579	0.0667174	1.61771	BLOOD
PACS1	695.409	1.05436	0.418022	2.52225	0.0116607	0.065923	1.65168	BLOOD
SLC12A6	584.137	1.28372	0.509459	2.51977	0.0117433	0.111685	0.801994	BLOOD
VPS52	677.384	2.04408	0.811371	2.51929	0.0117592	0.0966776	0.979283	BLOOD
SAYSD1	349.538	2.51249	0.997467	2.51887	0.0117734	0.0967223	0.979283	BLOOD
CENPM	130.744	-1.89505	0.752903	-2.51699	0.0118361	0.11719	0.751891	BLOOD
INPP5F	506.237	-1.39531	0.554523	-2.51624	0.0118616	0.121451	0.712913	BLOOD
PZP	265.556	2.41851	0.961677	2.51489	0.011907	0.11941	0.732799	BLOOD
LRRC8D	729.675	1.17676	0.468087	2.51398	0.0119378	0.0649277	1.72426	BLOOD
E2F7	117.69	-4.07103	1.6194	-2.51391	0.0119402	0.117898	0.751891	BLOOD
TRAF4	266.211	-1.68304	0.669566	-2.51362	0.0119498	0.103938	0.897104	BLOOD
ZNF234	537.362	1.43047	0.569357	2.51243	0.0119902	0.0981409	0.979283	BLOOD
SMCHD1	3883.93	0.493245	0.196357	2.51197	0.0120058	0.0466731	2.77365	BLOOD
NMUR1	66.6581	4.08196	1.62522	2.51164	0.0120172	0.11525	0.781597	BLOOD
IL16	4414.12	0.488894	0.194687	2.51118	0.012033	0.062284	1.84035	BLOOD
COG4	966.756	0.900831	0.359154	2.5082	0.0121347	0.0657712	1.72426	BLOOD
FAM83D	63.1229	-3.67601	1.46601	-2.50749	0.0121591	0.119244	0.751891	BLOOD
SNED1	109.984	2.74675	1.09609	2.50595	0.0122123	0.11941	0.751891	BLOOD
PATZ1	381.504	2.55234	1.01853	2.50591	0.0122137	0.105698	0.897104	BLOOD
SPDL1	140.141	2.44402	0.975463	2.50549	0.0122281	0.130626	0.667678	BLOOD
CTSS	1588.51	-0.714679	0.285266	-2.50531	0.0122345	0.0474213	2.77365	BLOOD
ZFYVE9	96.9633	3.18928	1.27316	2.50501	0.0122448	0.116789	0.781597	BLOOD
IMPDH2	1211.72	0.927126	0.370244	2.5041	0.0122764	0.0660397	1.72544	BLOOD
ETF1	606.109	-0.997114	0.398294	-2.50346	0.0122985	0.115141	0.801994	BLOOD
AGER	301.863	2.43202	0.971903	2.50232	0.0123381	0.146577	0.567907	BLOOD
CBX5	1114.88	0.765235	0.305868	2.50185	0.0123548	0.0635043	1.84035	BLOOD
PRDM1	1528.74	-1.149	0.459508	-2.50051	0.0124016	0.0639747	1.82762	BLOOD
TOM1L2	242.292	2.80574	1.12343	2.49748	0.0125079	0.118404	0.781597	BLOOD
AMY2B	101.811	2.56475	1.02701	2.49731	0.012514	0.123988	0.732799	BLOOD
CYLD	3038.62	0.484054	0.193832	2.49729	0.0125148	0.0660397	1.76003	BLOOD
HNRNPU	5005.69	-0.366838	0.1469	-2.4972	0.0125178	0.0639747	1.84451	BLOOD
RPS17	1169.81	-0.835981	0.334889	-2.4963	0.0125498	0.0692245	1.65168	BLOOD
MED4	182.131	-2.70607	1.08416	-2.49602	0.0125596	0.132665	0.667678	BLOOD
TMX4	1265.66	-0.825856	0.331334	-2.49252	0.0126841	0.0708404	1.61771	BLOOD
AP3D1	562.094	1.18557	0.475887	2.49128	0.0127283	0.117898	0.801994	BLOOD
CERS5	1203.08	0.782707	0.31454	2.48842	0.0128314	0.071485	1.61771	BLOOD
CEBPZ	1012.8	-0.774877	0.311558	-2.4871	0.0128789	0.0706845	1.65168	BLOOD
NDUFA2	769.56	-0.884756	0.356023	-2.48511	0.0129511	0.0688734	1.72426	BLOOD
RNF10	1638.1	0.875163	0.352352	2.48377	0.0129998	0.0680917	1.76003	BLOOD
RAN	3203.94	-0.435893	0.175713	-2.48071	0.0131122	0.0660748	1.84035	BLOOD
RBBP7	2901.74	0.744676	0.300213	2.48049	0.01312	0.0496743	2.77365	BLOOD
GYPC	1807.45	-0.767628	0.309499	-2.48023	0.0131298	0.0686138	1.76003	BLOOD
HIST1H4H	77.8503	-2.7093	1.09326	-2.4782	0.0132049	0.129279	0.732799	BLOOD
SLX4	48.43	3.74164	1.51056	2.477	0.0132494	1	0.0100266	BLOOD
USO1	693.409	1.19531	0.482754	2.47602	0.0132857	0.069917	1.72544	BLOOD
CRBN	1851.47	0.699466	0.282715	2.4741	0.0133573	0.0669866	1.84451	BLOOD
HIST1H1C	480.463	-1.35687	0.548533	-2.47364	0.0133746	0.13258	0.712913	BLOOD
SCFD1	1001.6	0.790872	0.319747	2.47343	0.0133823	0.0738806	1.61771	BLOOD
UBE2W	70.6629	-4.29323	1.73659	-2.47222	0.0134276	0.130626	0.732799	BLOOD
PARP9	1369.52	0.843443	0.341349	2.47091	0.0134768	0.0680374	1.82762	BLOOD
SMC1A	887.91	0.778858	0.315221	2.47083	0.01348	0.0707287	1.72544	BLOOD
NGRN	435.685	-0.989144	0.400431	-2.4702	0.0135037	0.133167	0.712913	BLOOD
RBPJ	1579.94	-0.741774	0.300311	-2.47002	0.0135107	0.0676646	1.84451	BLOOD
ERCC6L2	1242.56	1.22809	0.497201	2.47001	0.013511	0.0708404	1.72426	BLOOD
BCL7A	169.01	2.39869	0.971551	2.46893	0.0135518	0.125218	0.781597	BLOOD
PSAT1	63.3833	3.17914	1.28814	2.468	0.013587	0.12546	0.781597	BLOOD
LENG1	440.716	-1.02431	0.415143	-2.46737	0.0136108	0.107324	0.979283	BLOOD
HEATR6	418.609	1.22975	0.498503	2.46689	0.0136291	0.158375	0.567907	BLOOD
SPRY1	235.663	-2.90293	1.17715	-2.46606	0.0136609	0.196538	0.408145	BLOOD
ALG9	36.1048	-5.61047	2.27533	-2.46578	0.0136714	0.533437	0.0776153	BLOOD
UQCR10	1524.92	-0.726429	0.294866	-2.46359	0.0137553	0.0707287	1.76003	BLOOD
CDK11A	324.053	-1.24228	0.504259	-2.46357	0.0137559	0.124368	0.801994	BLOOD
ELP2	1258.27	0.887433	0.360253	2.46336	0.0137642	0.0754925	1.61771	BLOOD
SARDH	125.989	-3.3748	1.37016	-2.46307	0.0137752	0.124459	0.801994	BLOOD
FOSB	3149.09	-3.67354	1.49219	-2.46185	0.0138223	0.0690199	1.82762	BLOOD
EFHC1	355.736	1.69392	0.688399	2.46066	0.0138682	0.133137	0.732799	BLOOD
GPR174	755.515	-0.991584	0.403411	-2.458	0.0139712	0.0726144	1.72544	BLOOD
NPR2	63.2388	3.59941	1.46526	2.45651	0.0140296	0.132121	0.751891	BLOOD
TBC1D16	37.1958	4.45563	1.81502	2.45486	0.0140939	0.500132	0.0903516	BLOOD
SDF2L1	440.706	-1.15612	0.47104	-2.45441	0.0141117	0.0940876	1.22107	BLOOD
ZNF142	244.994	1.61139	0.656574	2.45425	0.014118	0.14364	0.667678	BLOOD
DMTF1	1554.69	0.719768	0.293389	2.45329	0.0141556	0.0702711	1.82762	BLOOD
CDYL2	145.643	2.1417	0.873353	2.45227	0.0141959	0.144252	0.667678	BLOOD
PMF1	419.458	-1.05128	0.429149	-2.44967	0.0142985	0.162793	0.567907	BLOOD
KIAA1324L	145.184	2.20992	0.902351	2.44907	0.0143225	0.130626	0.781597	BLOOD
MFSD4A	38.1495	4.47986	1.82998	2.44804	0.0143635	0.492298	0.0945096	BLOOD
TPM3	4909.45	-0.46815	0.191348	-2.44659	0.0144213	0.0712334	1.82762	BLOOD
ARMCX3	567.228	-1.12918	0.46167	-2.44587	0.0144505	0.0958259	1.22107	BLOOD
ZNF605	192.866	1.61781	0.661769	2.44467	0.0144983	0.13767	0.732799	BLOOD
RPA2	1890.02	0.631009	0.258206	2.44382	0.0145327	0.0716051	1.82762	BLOOD
APRT	2452.05	-0.479213	0.196173	-2.44281	0.0145735	0.0716871	1.82762	BLOOD
LARP1	935.56	1.15696	0.474568	2.43793	0.0147717	0.0757069	1.72544	BLOOD
FBLN2	188.493	3.23831	1.32833	2.43789	0.0147732	0.133073	0.781597	BLOOD
EVI2A	970.8	-0.84405	0.346312	-2.43725	0.0147993	0.0722343	1.84035	BLOOD
BPTF	2774.72	0.791815	0.325111	2.43552	0.0148703	0.0723576	1.84451	BLOOD
CD4	3066.45	0.978397	0.401728	2.43547	0.0148724	0.0750361	1.76003	BLOOD
PAGR1	167.156	-1.62012	0.665608	-2.43405	0.014931	0.13193	0.801994	BLOOD
SNRPF	463.134	-1.17214	0.48189	-2.43237	0.0150002	0.13235	0.801994	BLOOD
EIF4E	438.361	-1.06553	0.438155	-2.43186	0.0150216	0.115141	0.979283	BLOOD
TBCA	464.185	-0.922204	0.37937	-2.43088	0.0150622	0.132605	0.801994	BLOOD
PLCL2	1212.74	1.31242	0.540031	2.43027	0.0150875	0.0769333	1.72426	BLOOD
MT-ND1	20521.2	0.408461	0.16809	2.43001	0.0150983	0.0732854	1.84451	BLOOD
SEC24B	1016.8	0.778582	0.320425	2.42984	0.0151054	0.0793059	1.65168	BLOOD
SLC35E3	281.748	2.06175	0.84869	2.42933	0.0151267	0.115627	0.979283	BLOOD
SLCO4A1	109.844	-4.03785	1.66249	-2.4288	0.0151489	0.135649	0.781597	BLOOD
NUP85	766.4	0.987842	0.407442	2.4245	0.0153295	0.0778029	1.72426	BLOOD
ZHX3	221.294	2.58074	1.06471	2.42389	0.0153553	0.137143	0.781597	BLOOD
IARS	1701.57	0.667496	0.275462	2.42319	0.015385	0.0743558	1.84035	BLOOD
SHPRH	1053.21	0.805148	0.332305	2.42292	0.0153965	0.0780551	1.72426	BLOOD
SLC12A7	422.674	2.32109	0.958037	2.42275	0.0154033	0.171097	0.567907	BLOOD
NLRP1	2276.03	0.940828	0.388339	2.4227	0.0154058	0.0743494	1.84451	BLOOD
WWP2	763.438	1.22619	0.5064	2.42138	0.0154616	0.0781677	1.72544	BLOOD
HEATR1	336.226	-1.26413	0.522095	-2.42127	0.0154663	0.171697	0.567907	BLOOD
SUPT16H	1346.46	0.696831	0.288052	2.41911	0.0155583	0.0775091	1.76003	BLOOD
CFH	365.495	2.53776	1.05024	2.41635	0.015677	0.173232	0.567907	BLOOD
GNG10	79.7728	-2.14808	0.889398	-2.4152	0.0157265	0.156008	0.667678	BLOOD
ZNF169	196.166	2.39994	0.993714	2.41512	0.0157299	0.145364	0.732799	BLOOD
GABBR1	552.417	2.69156	1.11495	2.41406	0.0157759	0.14856	0.712913	BLOOD
NUCKS1	1133.13	-0.866125	0.358788	-2.41403	0.0157772	0.0820737	1.65168	BLOOD
FOXP1	4815.77	0.440569	0.182529	2.4137	0.0157915	0.0757069	1.84451	BLOOD
CDCA8	57.1032	6.26106	2.594	2.41367	0.0157926	0.137286	0.801994	BLOOD
SRSF1	1839.83	0.608176	0.251995	2.41344	0.0158027	0.0757069	1.84451	BLOOD
BRWD1	1659.88	0.629371	0.260894	2.41236	0.0158494	0.0764462	1.82762	BLOOD
UFL1	981.376	0.752572	0.311966	2.41236	0.0158498	0.082224	1.65168	BLOOD
UBL4A	737.753	1.03071	0.42727	2.41231	0.0158516	0.0760509	1.84035	BLOOD
RBM7	477.456	-1.1133	0.461514	-2.41227	0.0158534	0.137637	0.801994	BLOOD
FAS	881.983	-1.12752	0.46742	-2.41221	0.0158561	0.082224	1.65168	BLOOD
SF3B3	1528.58	0.88959	0.3688	2.41212	0.0158601	0.0784175	1.76003	BLOOD
SCRN1	125.873	2.78818	1.15627	2.41137	0.0158929	0.137804	0.801994	BLOOD
ADD2	72.7178	-5.89319	2.44434	-2.41095	0.0159112	0.143663	0.751891	BLOOD
DDX21	1196.6	-0.801856	0.332733	-2.40991	0.0159566	0.0764462	1.84035	BLOOD
FLYWCH1	436.68	1.36333	0.565868	2.40928	0.0159841	0.13833	0.801994	BLOOD
DHX15	1281.26	0.74095	0.307658	2.40835	0.0160247	0.0839829	1.61771	BLOOD
ARFGEF1	1283.74	0.833264	0.346087	2.40767	0.0160546	0.0840085	1.61771	BLOOD
SLBP	1350.45	-0.86147	0.357958	-2.40662	0.0161009	0.0793059	1.76003	BLOOD
ZBTB7A	166.869	-1.89841	0.789824	-2.40358	0.0162353	0.218248	0.408145	BLOOD
MTFR1L	612.958	1.32716	0.55218	2.40348	0.0162397	0.121294	0.979283	BLOOD
CUX1	777.556	1.17642	0.489575	2.40295	0.0162634	0.0811786	1.72544	BLOOD
SNAPC2	220.195	-1.42178	0.59207	-2.40138	0.0163333	0.142851	0.781597	BLOOD
PPME1	546.873	1.49421	0.622365	2.40086	0.0163566	0.12184	0.979283	BLOOD
NEAT1	3744.12	-0.587508	0.24493	-2.39868	0.0164544	0.0780551	1.84035	BLOOD
SLC12A9	60.6244	2.74372	1.14419	2.39796	0.0164865	0.147294	0.751891	BLOOD
TLR1	570.376	1.85072	0.771872	2.39771	0.0164981	0.141458	0.801994	BLOOD
LAMTOR5	1100.29	-0.714587	0.298098	-2.39716	0.0165228	0.0822044	1.72426	BLOOD
AAAS	513.723	1.81494	0.758554	2.39263	0.0167279	0.142761	0.801994	BLOOD
NR1H3	36.445	3.92839	1.64244	2.3918	0.0167658	0.535594	0.0945096	BLOOD
EFCAB14	2043.17	0.582558	0.243764	2.38984	0.0168557	0.0593458	2.77365	BLOOD
IFT81	68.911	2.9737	1.24451	2.38946	0.0168733	0.143179	0.801994	BLOOD
ADRM1	718.594	-0.858539	0.359418	-2.38869	0.0169084	0.0794578	1.84035	BLOOD
UBE2A	1267.3	-0.788003	0.329966	-2.38813	0.0169342	0.0871854	1.61771	BLOOD
BAG3	2732.64	-1.93017	0.808282	-2.388	0.0169406	0.0795309	1.84035	BLOOD
TARBP1	711.281	1.48332	0.621468	2.3868	0.0169959	0.0837073	1.72544	BLOOD
SEC16A	703.414	1.0194	0.427216	2.38615	0.0170259	0.0837818	1.72426	BLOOD
CORO6	28.9832	-4.97205	2.084	-2.38582	0.0170409	0.598017	0.0776153	BLOOD
RPS19BP1	749.622	-0.809199	0.33937	-2.38442	0.0171063	0.0840085	1.72426	BLOOD
TNKS	569.723	1.08078	0.453313	2.38418	0.0171174	0.144628	0.801994	BLOOD
TYMP	324.304	-1.62678	0.68247	-2.38367	0.0171408	0.184864	0.567907	BLOOD
UBA1	1874.2	0.697691	0.292745	2.38327	0.0171596	0.0601466	2.77365	BLOOD
CCL4L2	1647.49	-1.23974	0.520196	-2.38321	0.0171623	0.0601466	2.77365	BLOOD
DIAPH1	1809.21	0.6259	0.262679	2.38276	0.0171835	0.0810475	1.82762	BLOOD
PRPF3	1422.7	0.751869	0.315653	2.38195	0.0172213	0.0601466	2.77365	BLOOD
ABL2	330.955	2.00161	0.84051	2.38142	0.0172461	0.145534	0.801994	BLOOD
CASP8	2288.25	0.556057	0.233569	2.3807	0.0172798	0.0813009	1.82762	BLOOD
IKBKB	960.974	0.88811	0.373069	2.38055	0.0172867	0.0846764	1.72544	BLOOD
ATP6V1G1	3068.68	-0.707052	0.297164	-2.37934	0.0173439	0.0810475	1.84451	BLOOD
NDFIP1	1576.3	-0.600694	0.252532	-2.37869	0.0173743	0.0812444	1.84035	BLOOD
NLK	139.935	2.43456	1.02379	2.37798	0.017408	0.146535	0.801994	BLOOD
SCNN1D	35.4456	3.90185	1.64108	2.37761	0.017425	0.604595	0.0776153	BLOOD
TMEM42	475.01	2.0086	0.845771	2.37488	0.0175547	0.160358	0.712913	BLOOD
ZKSCAN1	952.462	0.798421	0.336209	2.37478	0.0175595	0.0897171	1.61771	BLOOD
GPRASP1	527.109	1.40806	0.593044	2.3743	0.0175823	0.147294	0.801994	BLOOD
ACTG1	22389.3	-0.397361	0.167389	-2.37387	0.0176025	0.0821164	1.84035	BLOOD
ANTXR2	927.193	1.05474	0.444869	2.37089	0.0177451	0.0905277	1.61771	BLOOD
PIGC	731.903	1.02816	0.433833	2.36995	0.0177906	0.0863168	1.72426	BLOOD
RALGAPA2	544.156	1.12512	0.474888	2.36923	0.017825	0.16205	0.712913	BLOOD
BEND4	96.0218	4.04859	1.70955	2.36822	0.017874	0.149345	0.801994	BLOOD
CLK2	233.925	1.7383	0.734161	2.36773	0.0178974	0.149448	0.801994	BLOOD
MAST3	663.763	0.847651	0.358231	2.36622	0.0179709	0.130706	0.979283	BLOOD
SNHG7	371.457	-1.07987	0.456589	-2.36508	0.0180263	0.130852	0.979283	BLOOD
COX5A	981.789	-0.686179	0.290159	-2.36483	0.0180382	0.0871376	1.72544	BLOOD
TRERF1	550.253	1.51279	0.639876	2.36419	0.0180697	0.114869	1.18766	BLOOD
PDIA3	3734.02	-0.437982	0.18527	-2.36403	0.0180775	0.0621946	2.77365	BLOOD
AHCYL2	282.317	2.1546	0.911453	2.36391	0.018083	0.160605	0.732799	BLOOD
LYZ	68.2808	-5.86291	2.48406	-2.36021	0.0182645	0.161926	0.732799	BLOOD
UBE2Z	874.847	1.09601	0.464443	2.35983	0.0182832	0.0877444	1.72544	BLOOD
PRPF8	2151.26	0.528852	0.224427	2.35645	0.0184503	0.0849272	1.82762	BLOOD
MAU2	870.726	1.14982	0.488071	2.35584	0.018481	0.084808	1.84035	BLOOD
LDHA	4909.67	-0.367169	0.155856	-2.35582	0.0184817	0.0631417	2.77365	BLOOD
ARF3	332.022	-1.18067	0.501189	-2.35575	0.0184854	0.14148	0.897104	BLOOD
KDM5A	3070.23	0.501016	0.212838	2.35397	0.0185739	0.0849272	1.84035	BLOOD
PDCD11	618.368	1.46054	0.620713	2.353	0.0186228	0.114876	1.22107	BLOOD
ZBTB43	540.951	-1.00903	0.428848	-2.3529	0.0186278	0.116843	1.18766	BLOOD
STAT3	2801.56	-0.553377	0.235245	-2.35234	0.0186558	0.0877444	1.76003	BLOOD
EML4	3356.87	-0.510392	0.21705	-2.3515	0.0186981	0.0851418	1.84451	BLOOD
ZNF670	37.2294	4.45631	1.89753	2.34847	0.0188505	0.568386	0.0945096	BLOOD
ACVR1	215.934	3.02203	1.28696	2.3482	0.0188646	0.175985	0.667678	BLOOD
AXIN2	188.555	2.1949	0.935189	2.34702	0.0189244	0.240669	0.408145	BLOOD
SLC2A6	56.1003	2.98511	1.27208	2.34663	0.0189441	0.156357	0.801994	BLOOD
SOS2	259.62	1.78287	0.759976	2.34595	0.0189785	0.156546	0.801994	BLOOD
UVRAG	580.692	-0.960894	0.409607	-2.34589	0.0189817	0.116204	1.22107	BLOOD
SDR42E2	61.5792	-3.48941	1.4882	-2.34471	0.0190417	0.163358	0.751891	BLOOD
BIK	83.0471	-4.34697	1.85433	-2.34423	0.0190666	0.163378	0.751891	BLOOD
PMVK	488.376	-1.11798	0.476921	-2.34416	0.01907	0.136113	0.979283	BLOOD
KLHL24	1147.47	0.761191	0.324759	2.34386	0.0190852	0.0866381	1.84035	BLOOD
HLA-G	683.973	1.40829	0.60143	2.34157	0.0192031	0.119244	1.18766	BLOOD
STX2	364.757	1.61925	0.691581	2.34138	0.0192127	0.167529	0.732799	BLOOD
NUP88	1239.57	1.32299	0.565069	2.3413	0.0192169	0.0959953	1.61771	BLOOD
SF3B1	8416.52	0.407201	0.173939	2.34105	0.0192296	0.0902369	1.76003	BLOOD
TFCP2	401.315	0.988979	0.422521	2.34066	0.0192496	0.197752	0.567907	BLOOD
FANCD2	476.726	1.42742	0.610025	2.33994	0.0192868	0.158494	0.801994	BLOOD
PLEKHM2	293.147	1.44292	0.616661	2.33989	0.0192896	0.158494	0.801994	BLOOD
MUTYH	458.323	1.27836	0.546446	2.33941	0.0193144	0.117594	1.22107	BLOOD
POLH	406.84	1.19291	0.509934	2.33934	0.019318	0.168052	0.732799	BLOOD
AHNAK	5530.33	0.868284	0.371199	2.33914	0.0193284	0.087268	1.84035	BLOOD
ENTPD4	1757	0.773812	0.330849	2.33887	0.0193422	0.087268	1.84035	BLOOD
KIZ	530.73	1.14437	0.489309	2.33874	0.0193488	0.137637	0.979283	BLOOD
PCMTD2	1307.17	0.893197	0.382101	2.33759	0.0194085	0.065452	2.77365	BLOOD
DAAM1	521.92	1.43796	0.6152	2.33738	0.0194195	0.158927	0.801994	BLOOD
APPL2	290.67	1.63212	0.698919	2.3352	0.0195329	0.159352	0.801994	BLOOD
ZNF564	25.0737	-3.31455	1.41994	-2.33428	0.0195811	0.642639	0.0776153	BLOOD
EPC1	1887.72	-0.759613	0.325487	-2.33378	0.0196075	0.0659528	2.77365	BLOOD
MBTPS1	1759.44	0.726645	0.31143	2.33325	0.019635	0.0916521	1.76003	BLOOD
ANP32E	2137.16	-0.640537	0.274559	-2.33297	0.01965	0.0660391	2.77365	BLOOD
USP13	202.599	2.79432	1.19776	2.33294	0.0196511	0.170151	0.732799	BLOOD
PLEKHA5	104.498	2.28282	0.978948	2.33191	0.0197053	0.162916	0.781597	BLOOD
ST6GALNAC6	117.79	-3.42984	1.47121	-2.3313	0.0197374	0.167635	0.751891	BLOOD
COA7	45.6272	3.18597	1.36687	2.33085	0.0197613	1	0.0100266	BLOOD
ZBED6CL	123.941	2.45668	1.05443	2.32987	0.019813	0.163378	0.781597	BLOOD
RHPN1	170.113	2.56871	1.10268	2.3295	0.0198324	0.170823	0.732799	BLOOD
COLGALT2	34.5216	4.38371	1.88208	2.32918	0.0198493	0.645976	0.0776153	BLOOD
CSNK2B	839.353	-0.761804	0.32721	-2.32818	0.0199024	0.0940516	1.72544	BLOOD
ZZEF1	939.452	1.13474	0.487485	2.32774	0.0199259	0.098367	1.61771	BLOOD
GPR183	8274.57	0.587258	0.252617	2.3247	0.0200882	0.0906421	1.82762	BLOOD
RAP1A	789.542	-0.921726	0.396543	-2.3244	0.0201039	0.094643	1.72426	BLOOD
ZNF770	1030.68	0.754277	0.324521	2.32428	0.0201105	0.0989145	1.61771	BLOOD
MCC	182.263	1.87471	0.807349	2.32205	0.0202301	0.165776	0.781597	BLOOD
TRGC2	1154.22	1.08534	0.467576	2.32121	0.0202758	0.0982751	1.65168	BLOOD
ZC2HC1C	61.2051	4.467	1.92475	2.32082	0.0202963	0.166221	0.781597	BLOOD
ANKZF1	2060.3	0.752909	0.324602	2.31948	0.0203689	0.0912036	1.84035	BLOOD
SHOC2	863.205	-0.987215	0.425841	-2.31827	0.0204346	0.0958259	1.72544	BLOOD
ADAM28	39.709	-3.74563	1.61632	-2.31738	0.0204832	1	0.0100266	BLOOD
IL18BP	694.008	-1.7492	0.754866	-2.31723	0.0204913	0.0987873	1.65168	BLOOD
ERH	388.298	-0.950437	0.410375	-2.31602	0.0205571	0.143088	0.979283	BLOOD
PPP1R12B	461.041	1.25951	0.544515	2.31309	0.0207179	0.180082	0.712913	BLOOD
MAVS	446.544	1.38438	0.598585	2.31276	0.0207357	0.125839	1.18766	BLOOD
ODC1	1563.69	-0.928203	0.401395	-2.31244	0.0207534	0.0955718	1.76003	BLOOD
COPS6	1656.6	0.665305	0.287708	2.31243	0.0207538	0.0929403	1.82762	BLOOD
ARAP2	1953.02	0.580493	0.251199	2.31089	0.0208389	0.0927453	1.84035	BLOOD
ADIPOR2	525.811	0.892848	0.386399	2.31069	0.02085	0.144362	0.979283	BLOOD
ATAD3B	126.246	1.75648	0.760249	2.3104	0.0208663	0.173652	0.751891	BLOOD
SLC25A19	172.93	-1.54676	0.669661	-2.30976	0.0209012	0.169874	0.781597	BLOOD
MOB4	600.386	-0.885491	0.383561	-2.30861	0.0209653	0.167136	0.801994	BLOOD
KIDINS220	1033.8	0.915947	0.396756	2.30859	0.0209665	0.101931	1.61771	BLOOD
ERBIN	1674.97	0.693189	0.300282	2.30846	0.0209737	0.0690199	2.77365	BLOOD
PTPN12	220.961	2.25778	0.978498	2.3074	0.0210327	0.170253	0.781597	BLOOD
COPS7B	620.787	1.08589	0.470845	2.30627	0.0210956	0.182582	0.712913	BLOOD
SENP5	1132.06	0.953087	0.413287	2.30612	0.0211041	0.101075	1.65168	BLOOD
USP40	249.585	2.02994	0.880315	2.30592	0.021115	0.170675	0.781597	BLOOD
ATG101	273.821	-1.65304	0.716972	-2.30558	0.0211342	0.168052	0.801994	BLOOD
ZNF101	841.038	1.03727	0.450321	2.30341	0.021256	0.101581	1.65168	BLOOD
ZNF764	133.54	-1.77666	0.771604	-2.30255	0.021304	0.171731	0.781597	BLOOD
NLRC3	834.242	0.896316	0.389273	2.30254	0.0213047	0.0985348	1.72544	BLOOD
ACAD10	421.161	2.03063	0.882206	2.30176	0.0213486	0.169494	0.801994	BLOOD
PARP6	844.066	0.992452	0.431183	2.3017	0.0213523	0.0986774	1.72426	BLOOD
KDM3A	1137.12	1.25635	0.546492	2.29894	0.0215085	0.102194	1.65168	BLOOD
ATF5	59.9462	-3.51847	1.53077	-2.2985	0.0215333	0.177872	0.751891	BLOOD
MAN2B1	87.1949	-2.45169	1.06693	-2.29789	0.0215683	0.170253	0.801994	BLOOD
C14orf119	1099.12	0.82817	0.360514	2.29719	0.0216079	0.0994887	1.72544	BLOOD
LGALS3	774.123	-1.54499	0.672582	-2.2971	0.0216129	0.0994887	1.72426	BLOOD
ICAM3	1137.18	-0.63488	0.276423	-2.29677	0.0216318	0.0994887	1.72426	BLOOD
DHX32	142.111	1.90961	0.831463	2.29669	0.0216363	0.193417	0.667678	BLOOD
CENPC	1356.98	-0.806491	0.351316	-2.29563	0.021697	0.0955718	1.84035	BLOOD
MYO18A	366.164	1.58927	0.692418	2.29524	0.0217194	0.148804	0.979283	BLOOD
COPS4	726.626	0.983116	0.428392	2.2949	0.021739	0.103066	1.65168	BLOOD
EIF3K	2978.25	-0.467153	0.203666	-2.29372	0.0218069	0.0958259	1.84035	BLOOD
MYO1C	135.16	-2.53125	1.10441	-2.29195	0.0219084	0.183587	0.732799	BLOOD
WDR19	199.565	2.17924	0.95094	2.29167	0.0219245	0.171851	0.801994	BLOOD
FDX1	506.64	-1.15368	0.503545	-2.29112	0.0219564	0.129102	1.22107	BLOOD
STAT6	1818.74	0.608147	0.265723	2.28865	0.0220999	0.0716871	2.77365	BLOOD
THEMIS	1991.14	0.683926	0.299116	2.28649	0.0222255	0.0968689	1.84451	BLOOD
ARHGAP18	352.084	-1.73927	0.761088	-2.28524	0.0222986	0.173778	0.801994	BLOOD
GSN	48.2958	3.00482	1.31504	2.28496	0.0223154	0.635526	0.0903516	BLOOD
TF	28.0088	-4.19707	1.8371	-2.28461	0.0223354	1	0.0100266	BLOOD
RNF157	284.966	1.50178	0.657669	2.28349	0.0224014	0.161938	0.897104	BLOOD
XPO5	578.777	2.10878	0.92354	2.28336	0.0224089	0.189697	0.712913	BLOOD
EIF5B	1233.13	-0.820967	0.359568	-2.2832	0.0224185	0.102038	1.72544	BLOOD
TRMT2B	516.157	1.15737	0.507166	2.28204	0.0224872	0.152726	0.979283	BLOOD
DUSP5	402.514	-5.40358	2.36807	-2.28185	0.0224982	0.152726	0.979283	BLOOD
C1QTNF3	33.2113	3.87727	1.70025	2.2804	0.0225837	0.637437	0.0909799	BLOOD
APOL2	906.213	0.865826	0.379719	2.28018	0.0225972	0.0982751	1.84035	BLOOD
MROH8	97.4684	3.6275	1.59094	2.2801	0.0226016	0.179396	0.781597	BLOOD
SFT2D2	1353.61	0.646839	0.283788	2.2793	0.022649	0.0983557	1.84035	BLOOD
FGFBP2	213.107	6.13447	2.69192	2.27885	0.0226762	0.269612	0.408145	BLOOD
COL1A2	43.7462	4.1434	1.81995	2.27666	0.0228066	0.640333	0.0909799	BLOOD
FAM50A	729.699	-0.871077	0.38299	-2.27441	0.0229414	0.103938	1.72426	BLOOD
EIF4H	1511.09	-0.549091	0.241498	-2.27369	0.0229845	0.0996289	1.82762	BLOOD
ZNF793	98.7936	2.21802	0.975715	2.27323	0.0230123	0.18678	0.751891	BLOOD
ARHGAP12	632.964	1.27694	0.561886	2.2726	0.0230501	0.155995	0.979283	BLOOD
KMT2D	532.125	1.11652	0.491315	2.27252	0.0230553	0.135774	1.18766	BLOOD
MRPS34	909.324	-0.712142	0.313463	-2.27186	0.0230952	0.0994887	1.84035	BLOOD
PCM1	2648.79	0.452678	0.19927	2.27168	0.0231058	0.0742161	2.77365	BLOOD
NAGLU	79.4897	2.77823	1.22307	2.27152	0.0231154	0.200689	0.667678	BLOOD
CELSR2	59.922	5.82344	2.56421	2.27104	0.0231444	0.190243	0.732799	BLOOD
ERLIN2	184.895	-1.87839	0.827121	-2.27099	0.0231474	0.182582	0.781597	BLOOD
COQ10B	1197.65	-0.795499	0.350342	-2.27064	0.0231688	0.107901	1.65168	BLOOD
BCR	333.643	1.56543	0.689528	2.27029	0.0231902	0.165663	0.897104	BLOOD
TRAF6	628.677	1.25123	0.551264	2.26976	0.0232224	0.179533	0.801994	BLOOD
BCO2	75.506	4.3668	1.92416	2.26946	0.0232402	0.182795	0.781597	BLOOD
AP1S1	201.805	-2.16587	0.954863	-2.26826	0.0233136	0.191151	0.732799	BLOOD
CMTM7	1980.4	0.6098	0.268874	2.26798	0.0233306	0.0747544	2.77365	BLOOD
NCAPG2	93.6856	3.5518	1.567	2.26663	0.0234128	0.180766	0.801994	BLOOD
SMYD4	312.443	2.50419	1.10522	2.26579	0.0234645	0.180889	0.801994	BLOOD
MGAT2	146.059	-2.27772	1.00532	-2.26566	0.0234721	0.192025	0.732799	BLOOD
C11orf58	2027.46	-0.525613	0.232056	-2.26503	0.023511	0.100904	1.84451	BLOOD
PHLDA2	181.231	-3.49548	1.54388	-2.26409	0.0235684	0.192389	0.732799	BLOOD
AHR	229.698	-1.94176	0.857641	-2.26407	0.0235697	0.184864	0.781597	BLOOD
C2CD5	382.36	1.40238	0.619451	2.2639	0.0235804	0.158494	0.979283	BLOOD
GLIPR1	1413.99	-0.60148	0.265704	-2.26372	0.0235912	0.101101	1.84451	BLOOD
GNAQ	406.986	2.17805	0.962423	2.26309	0.0236304	0.224222	0.567907	BLOOD
SPOCK2	3875.69	0.494547	0.218752	2.26076	0.0237741	0.101663	1.84451	BLOOD
CAMTA1	395.662	-1.06975	0.473187	-2.26073	0.0237757	0.225154	0.567907	BLOOD
PALLD	75.9299	4.27915	1.893	2.26051	0.0237898	0.193557	0.732799	BLOOD
PKD2	79.5185	2.94147	1.30165	2.25981	0.0238332	0.203983	0.667678	BLOOD
ARHGEF1	3930.64	0.493142	0.218283	2.25919	0.0238719	0.101931	1.84451	BLOOD
IGIP	81.2157	3.30352	1.46234	2.25906	0.0238795	0.186557	0.781597	BLOOD
DUSP22	383.256	2.13073	0.943222	2.25899	0.023884	0.159352	0.979283	BLOOD
UBE2L6	2440.47	0.675877	0.299212	2.25886	0.023892	0.102443	1.82762	BLOOD
SLFN13	254.646	1.59391	0.705806	2.25828	0.0239282	0.278502	0.408145	BLOOD
GBA2	610.362	1.15319	0.510756	2.2578	0.0239578	0.196799	0.712913	BLOOD
SNX17	1854.74	0.561299	0.24918	2.25258	0.0242855	0.0769333	2.77365	BLOOD
MYCBP2	2861.72	0.616133	0.273524	2.25258	0.0242859	0.106974	1.76003	BLOOD
CEP162	145.428	1.99694	0.887015	2.2513	0.0243666	0.195805	0.732799	BLOOD
ZNF557	348.954	2.02684	0.900407	2.25103	0.0243836	0.185859	0.801994	BLOOD
GPATCH8	1005.17	0.713285	0.316935	2.25057	0.0244125	0.11438	1.61771	BLOOD
EIF5	3997.34	-0.561055	0.249324	-2.2503	0.0244297	0.103799	1.84035	BLOOD
FYB1	11019.1	0.454069	0.201789	2.25021	0.0244355	0.107324	1.76003	BLOOD
RPP21	446.557	-1.4202	0.631191	-2.25003	0.024447	0.161938	0.979283	BLOOD
BTBD10	356.152	1.13525	0.50461	2.24975	0.0244648	0.171731	0.897104	BLOOD
SESN1	1110.61	0.782193	0.347889	2.2484	0.0245509	0.112978	1.65168	BLOOD
AGFG1	372.749	1.6384	0.72935	2.24639	0.024679	0.229945	0.567907	BLOOD
C5orf15	620.698	-0.954419	0.425165	-2.24482	0.0247797	0.163318	0.979283	BLOOD
SPCS1	1839.68	-0.677879	0.302001	-2.24463	0.0247922	0.0780551	2.77365	BLOOD
NAT14	39.7691	-4.38554	1.9541	-2.24428	0.0248145	0.719766	0.0776153	BLOOD
AHDC1	83.35	2.28237	1.01744	2.24326	0.02488	0.188161	0.801994	BLOOD
GZMB	226.902	2.83783	1.26512	2.24312	0.024889	0.191221	0.781597	BLOOD
ZNF275	210.454	2.21352	0.987023	2.24263	0.0249209	0.209159	0.667678	BLOOD
PCF11	1259.14	0.980047	0.437174	2.24178	0.0249757	0.105436	1.84035	BLOOD
RUNX3	1643.76	-0.547858	0.244405	-2.2416	0.0249871	0.0784175	2.77365	BLOOD
LCLAT1	532.932	0.992245	0.442839	2.24064	0.0250492	0.141397	1.22107	BLOOD
ZSCAN12	149.378	2.24804	1.00364	2.23988	0.0250988	0.189183	0.801994	BLOOD
MCOLN1	147.574	-1.71575	0.766246	-2.23916	0.0251456	0.210458	0.667678	BLOOD
HADH	323.173	1.49586	0.668344	2.23816	0.0252106	0.233655	0.567907	BLOOD
ZBTB37	233.65	1.77913	0.795333	2.23696	0.0252888	0.193285	0.781597	BLOOD
PAOX	54.3379	-4.10054	1.83401	-2.23583	0.0253629	0.197237	0.751891	BLOOD
ZNF2	234.422	2.05338	0.919152	2.234	0.0254831	0.289267	0.408145	BLOOD
PPA2	796.966	0.93897	0.420496	2.23301	0.0255485	0.107324	1.84035	BLOOD
KLHDC3	913.696	0.943126	0.422509	2.2322	0.0256014	0.115948	1.65168	BLOOD
ATXN7L1	623.163	-1.02007	0.4571	-2.23162	0.0256398	0.143088	1.22107	BLOOD
C15orf48	32.677	-4.76759	2.1371	-2.23087	0.0256897	0.66511	0.0945096	BLOOD
TFPT	199.902	-1.55699	0.698002	-2.23064	0.0257048	0.290176	0.408145	BLOOD
PTP4A2	1732.82	0.581162	0.260583	2.23024	0.0257317	0.107461	1.84451	BLOOD
AGO4	248.197	2.45502	1.10109	2.22962	0.0257725	0.214053	0.667678	BLOOD
ARV1	222.458	1.80302	0.80869	2.22956	0.0257767	0.202288	0.732799	BLOOD
PTGER2	2069.73	0.810343	0.363687	2.22813	0.0258717	0.111962	1.76003	BLOOD
PSMA1	1147.83	-0.608764	0.27332	-2.2273	0.0259275	0.114004	1.72544	BLOOD
SORBS1	55.1853	4.83508	2.17111	2.22701	0.0259466	0.215061	0.667678	BLOOD
AAR2	566.863	1.0189	0.457683	2.2262	0.0260005	0.147244	1.18766	BLOOD
MTO1	1240.09	0.922594	0.414469	2.22597	0.0260164	0.118829	1.61771	BLOOD
NOXA1	61.5053	-2.87001	1.2899	-2.22498	0.0260826	0.20098	0.751891	BLOOD
TGFBRAP1	378.336	1.19454	0.536916	2.22483	0.026093	0.203692	0.732799	BLOOD
ITPR3	740.176	0.963631	0.433393	2.22346	0.026185	0.119259	1.61771	BLOOD
HTT	765.418	0.750238	0.337623	2.22212	0.0262755	0.114869	1.72544	BLOOD
FAAP20	418.02	-1.11469	0.501733	-2.22168	0.0263046	0.240669	0.567907	BLOOD
BEX3	451.312	1.58126	0.711754	2.22163	0.0263082	0.170253	0.979283	BLOOD
UGGT1	548.92	1.02558	0.46171	2.22127	0.0263326	0.170253	0.979283	BLOOD
RASGRF2	404.932	1.91004	0.859895	2.22125	0.0263337	0.194728	0.801994	BLOOD
MATK	448.902	1.49473	0.672938	2.2212	0.0263374	0.194728	0.801994	BLOOD
CNPY2	415.667	-1.00367	0.45187	-2.22115	0.0263406	0.181326	0.897104	BLOOD
ARGLU1	3330.64	-0.436032	0.196345	-2.22075	0.026368	0.110277	1.82762	BLOOD
DBN1	113.896	2.96896	1.33784	2.21921	0.0264724	0.197706	0.781597	BLOOD
ZNF587B	90.5339	2.63852	1.189	2.21912	0.0264788	0.194923	0.801994	BLOOD
JPX	126.251	-1.80149	0.812056	-2.21844	0.0265251	0.205736	0.732799	BLOOD
NDUFA7	99.3765	-1.9246	0.868182	-2.21681	0.0266358	0.203077	0.751891	BLOOD
HNRNPD	1025.8	0.69576	0.314091	2.21516	0.0267493	0.119259	1.65168	BLOOD
USP19	373.328	1.56979	0.708716	2.21497	0.026762	0.206632	0.732799	BLOOD
EXD2	187.558	2.50144	1.1297	2.21425	0.0268116	0.196462	0.801994	BLOOD
KIF5B	2196.48	-0.483415	0.218336	-2.21409	0.0268224	0.114869	1.76003	BLOOD
CHD8	1253.4	0.876047	0.395887	2.21287	0.0269067	0.121451	1.61771	BLOOD
OTUD3	104.609	1.9688	0.889785	2.21267	0.0269203	0.196784	0.801994	BLOOD
SMYD5	279.458	2.04555	0.924592	2.21238	0.0269402	0.196799	0.801994	BLOOD
ABRACL	1686.88	-0.788608	0.356564	-2.21169	0.0269881	0.0831425	2.77365	BLOOD
TMC8	3604.33	0.498436	0.225386	2.21147	0.0270031	0.111685	1.84451	BLOOD
IKBKG	150.25	-1.72791	0.781528	-2.21094	0.0270401	0.208054	0.732799	BLOOD
CPSF3	404.071	1.63248	0.738388	2.21087	0.0270448	0.197237	0.801994	BLOOD
NCAPD2	373.189	1.32193	0.597957	2.21075	0.0270531	0.173261	0.979283	BLOOD
SLC27A4	64.7368	2.6756	1.21031	2.21068	0.0270581	0.220347	0.667678	BLOOD
FGFR1OP2	1769.77	-0.533838	0.241509	-2.21043	0.0270753	0.0832799	2.77365	BLOOD
HIST3H2A	326.357	-1.1233	0.508514	-2.20898	0.0271762	0.246268	0.567907	BLOOD
SRRM1	2471.61	-0.44291	0.200548	-2.2085	0.0272095	0.0835524	2.77365	BLOOD
ANKRD52	465.114	1.0399	0.470998	2.20786	0.0272539	0.152726	1.18766	BLOOD
ZBTB40	538.074	1.12588	0.510283	2.20638	0.0273573	0.174404	0.979283	BLOOD
SSBP4	206.124	-1.2968	0.587842	-2.20604	0.0273814	0.198867	0.801994	BLOOD
LMLN	74.0469	3.19053	1.44675	2.20531	0.027432	0.22228	0.667678	BLOOD
PCGF3	875.838	0.812345	0.368395	2.20509	0.0274477	0.121451	1.65168	BLOOD
C2orf68	958.62	1.1247	0.5104	2.20357	0.0275544	0.118399	1.72426	BLOOD
MAP3K2	988.921	0.869293	0.394697	2.20243	0.0276351	0.118423	1.72544	BLOOD
TEC	52.6577	3.97175	1.80381	2.20187	0.0276745	0.20771	0.751891	BLOOD
PITPNC1	1326.2	0.742885	0.337496	2.20117	0.027724	0.114004	1.84451	BLOOD
CADM1	24.4945	-5.38014	2.44509	-2.20039	0.0277796	1	0.0100266	BLOOD
NOL8	1089.61	0.693295	0.315425	2.19797	0.0279513	0.114869	1.84035	BLOOD
SDHA	1679.84	0.53399	0.24301	2.1974	0.0279921	0.114869	1.84035	BLOOD
BTN3A1	2029.27	0.646811	0.294455	2.19664	0.0280464	0.114869	1.84035	BLOOD
PTEN	1121.89	0.862774	0.393042	2.19512	0.0281551	0.114995	1.84035	BLOOD
FBXW8	34.4399	4.38162	1.99612	2.19507	0.0281589	0.762526	0.0776153	BLOOD
TPM2	59.0172	2.97935	1.3576	2.19458	0.028194	0.209866	0.751891	BLOOD
TRMT10A	102.554	2.68735	1.22572	2.19247	0.0283454	0.20579	0.781597	BLOOD
RPP38	305.308	1.97534	0.901185	2.19193	0.0283843	0.214687	0.732799	BLOOD
GABPB2	1039.57	0.940043	0.428927	2.19162	0.0284073	0.120502	1.72544	BLOOD
CD53	10335	0.428777	0.195708	2.19091	0.0284587	0.115573	1.84451	BLOOD
SS18L2	883.021	-0.638255	0.291349	-2.19069	0.0284742	0.124752	1.65168	BLOOD
MYCBPAP	23.1088	-5.95668	2.7205	-2.18956	0.0285563	1	0.0100266	BLOOD
RMDN1	434.123	0.974687	0.445276	2.18895	0.0286006	0.158494	1.18766	BLOOD
SRSF11	4573.84	-0.400924	0.183289	-2.18738	0.0287148	0.119654	1.76003	BLOOD
STT3A	1518.83	0.777501	0.355468	2.18726	0.0287235	0.116591	1.84035	BLOOD
COG2	675.471	0.909113	0.415898	2.1859	0.0288227	0.220264	0.712913	BLOOD
ANKRD12	4895.65	-0.367916	0.168314	-2.18589	0.028824	0.11733	1.82762	BLOOD
ZNF785	51.7672	2.46068	1.12579	2.18573	0.0288352	0.204923	0.801994	BLOOD
PRDX1	1477.35	-0.623769	0.285391	-2.18567	0.0288399	0.116644	1.84451	BLOOD
PELO	382.42	-2.54747	1.16561	-2.18553	0.0288503	0.255746	0.567907	BLOOD
IFT74	206.607	2.01101	0.920207	2.18539	0.0288604	0.208054	0.781597	BLOOD
PPP4R3B	1974.34	0.566175	0.2591	2.18516	0.0288771	0.12025	1.76003	BLOOD
RRP36	267.062	1.25729	0.575974	2.1829	0.0290434	0.218004	0.732799	BLOOD
PLAUR	195.462	-1.33577	0.612124	-2.18219	0.0290955	0.314712	0.408145	BLOOD
GSTP1	1406.93	-0.709194	0.325028	-2.18195	0.0291132	0.087268	2.77365	BLOOD
FUS	3223.95	-0.456868	0.209421	-2.18158	0.0291409	0.118215	1.82762	BLOOD
ARMCX6	188.843	-1.58063	0.724695	-2.1811	0.029176	0.218293	0.732799	BLOOD
PLEKHG4	127.815	1.84253	0.844817	2.18098	0.0291849	0.218293	0.732799	BLOOD
PDS5A	1153.42	0.752004	0.344916	2.18025	0.0292387	0.127423	1.65168	BLOOD
LSG1	676.612	0.997299	0.457491	2.17993	0.0292625	0.158246	1.22107	BLOOD
GIMAP1	1655.59	0.737387	0.338302	2.17967	0.0292818	0.0875919	2.77365	BLOOD
GOLGA8A	917.487	1.10837	0.508645	2.17906	0.0293269	0.123821	1.72426	BLOOD
ULK3	926.466	1.11884	0.513608	2.1784	0.0293763	0.123864	1.72426	BLOOD
GDPD5	274.923	1.31141	0.602017	2.17836	0.0293791	0.194613	0.897104	BLOOD
PIEZO1	750.731	0.949957	0.436189	2.17785	0.0294169	0.123867	1.72544	BLOOD
AGBL5	169.159	2.63229	1.20883	2.17756	0.0294392	0.316885	0.408145	BLOOD
HECTD3	819.37	1.10376	0.507137	2.17645	0.0295214	0.124226	1.72426	BLOOD
FAR2	60.5965	3.33509	1.53245	2.17632	0.0295316	0.232916	0.667678	BLOOD
MRPS12	409.003	-1.0387	0.477808	-2.17389	0.0297132	0.208249	0.801994	BLOOD
TMEM70	673.541	-1.08152	0.497657	-2.17323	0.0297632	0.185859	0.979283	BLOOD
HIST3H2BB	18.5702	-4.83231	2.22365	-2.17314	0.0297694	0.78435	0.0776153	BLOOD
ANKDD1A	70.1353	-2.64663	1.21797	-2.17299	0.0297811	0.212162	0.781597	BLOOD
PTP4A1	881.118	1.83572	0.844835	2.17287	0.0297899	0.124854	1.72544	BLOOD
PAWR	30.3372	4.25966	1.96063	2.1726	0.0298105	1	0.0100266	BLOOD
PRDM11	29.2222	4.22354	1.94495	2.17154	0.0298902	0.731836	0.0903516	BLOOD
AP3M1	742.051	0.876597	0.403686	2.17148	0.0298948	0.131193	1.61771	BLOOD
ZFR	1989.71	0.630625	0.290444	2.17124	0.0299129	0.11934	1.84451	BLOOD
AKAP5	482.565	1.64681	0.758482	2.17119	0.029917	0.186557	0.979283	BLOOD
SYF2	1389.68	-0.642327	0.295907	-2.17071	0.0299534	0.119529	1.84035	BLOOD
DDX6	2317.43	0.682404	0.314532	2.16959	0.0300379	0.120376	1.82762	BLOOD
CCDC124	343.734	-0.943119	0.434724	-2.16947	0.0300471	0.221944	0.732799	BLOOD
HIST1H2AG	77.3849	-3.43497	1.58428	-2.16816	0.0301466	0.210273	0.801994	BLOOD
NME3	413.012	-0.977693	0.451029	-2.16769	0.030182	0.18738	0.979283	BLOOD
FLT3LG	91.9288	-1.74873	0.806946	-2.1671	0.0302274	0.219685	0.751891	BLOOD
RBM4	593.458	-1.08735	0.502055	-2.16579	0.0303269	0.161451	1.22107	BLOOD
CXXC5	129.145	3.07179	1.41833	2.16578	0.030328	0.237586	0.667678	BLOOD
NSMCE4A	866.218	1.11951	0.517115	2.16491	0.0303943	0.132605	1.61771	BLOOD
SMARCD2	189.581	1.61726	0.747165	2.16453	0.030424	0.215308	0.781597	BLOOD
GTF3C1	720.646	-0.864072	0.399202	-2.1645	0.0304262	0.130864	1.65168	BLOOD
GRPEL1	786.701	-1.14357	0.5284	-2.16422	0.0304476	0.132665	1.61771	BLOOD
SETD1A	138.239	1.80735	0.835126	2.16416	0.0304519	0.23787	0.667678	BLOOD
C1orf159	58.3297	2.96945	1.3734	2.16212	0.0306088	0.212363	0.801994	BLOOD
SGMS1	450.995	-0.990652	0.458221	-2.16195	0.030622	0.229309	0.712913	BLOOD
LEO1	650.728	1.18196	0.547063	2.16055	0.0307302	0.189485	0.979283	BLOOD
DPY19L2	32.2704	4.31883	1.99998	2.15944	0.0308164	0.739556	0.0909799	BLOOD
GRB2	2788.18	-0.433789	0.200886	-2.15938	0.0308206	0.0913751	2.77365	BLOOD
CD244	585.175	1.25003	0.578892	2.15935	0.0308229	0.213452	0.801994	BLOOD
MTF2	1798.37	0.590386	0.273424	2.15923	0.0308324	0.122129	1.84035	BLOOD
POLR1C	784.948	0.865801	0.401307	2.15745	0.0309705	0.122594	1.84035	BLOOD
MAP9	202.694	-1.70885	0.792555	-2.15612	0.0310739	0.218248	0.781597	BLOOD
KRAS	686.543	-0.886533	0.411226	-2.15583	0.0310968	0.190897	0.979283	BLOOD
ANAPC5	2909.35	0.502244	0.233025	2.15532	0.0311366	0.123864	1.82762	BLOOD
PDLIM1	62.2423	4.007	1.86134	2.15275	0.0313386	0.224435	0.751891	BLOOD
C19orf67	20.2327	-5.85618	2.72053	-2.15259	0.031351	0.748231	0.0903516	BLOOD
GALM	1007.73	-0.739562	0.343628	-2.15222	0.0313801	0.133484	1.65168	BLOOD
PIK3R2	32.213	-5.22339	2.42708	-2.15213	0.0313873	0.747258	0.0909799	BLOOD
ZNF181	312.886	1.67354	0.777632	2.1521	0.0313896	0.201861	0.897104	BLOOD
RTKN2	1380.06	2.48225	1.15342	2.15207	0.031392	0.1283	1.76003	BLOOD
RAPGEF6	863.724	-0.869988	0.40439	-2.15136	0.0314479	0.130589	1.72426	BLOOD
LYN	133.647	-3.00296	1.39584	-2.15136	0.031448	0.243506	0.667678	BLOOD
ST7L	149.464	-1.59519	0.741606	-2.15099	0.031477	0.229309	0.732799	BLOOD
PSMB7	1243.6	0.605448	0.281537	2.15051	0.0315147	0.130626	1.72426	BLOOD
GANC	614.664	1.24401	0.5786	2.15003	0.031553	0.216846	0.801994	BLOOD
RANBP1	462.74	-0.931781	0.433405	-2.14991	0.0315623	0.165663	1.22107	BLOOD
PTTG1IP	1187.33	0.952706	0.443178	2.14971	0.031578	0.130626	1.72544	BLOOD
DNAJB11	722.328	-0.725513	0.33754	-2.14941	0.0316018	0.130626	1.72426	BLOOD
BAZ2A	2245.89	0.560596	0.260882	2.14885	0.0316464	0.0932418	2.77365	BLOOD
XBP1	3662.9	0.523695	0.243746	2.14852	0.0316721	0.125218	1.82762	BLOOD
CCR9	265.354	2.84201	1.32298	2.14819	0.031699	0.217519	0.801994	BLOOD
KIAA0232	762.286	1.05082	0.489204	2.14801	0.0317127	0.130737	1.72544	BLOOD
KNTC1	269.27	2.24742	1.04632	2.14794	0.0317184	0.202791	0.897104	BLOOD
RASGRP4	224.273	1.82652	0.850753	2.14695	0.0317973	0.220875	0.781597	BLOOD
METTL22	360.049	1.55761	0.725521	2.14688	0.0318025	0.203077	0.897104	BLOOD
PLP2	1650.55	-0.5091	0.237143	-2.14681	0.0318087	0.129488	1.76003	BLOOD
RAB38	21.1151	-5.79224	2.69944	-2.14572	0.0318954	0.75411	0.0903516	BLOOD
FUBP1	2017.42	0.609498	0.284417	2.14297	0.0321156	0.125839	1.84035	BLOOD
YDJC	670.34	-0.818002	0.381728	-2.14289	0.0321216	0.219198	0.801994	BLOOD
SF3A2	347.129	-0.998522	0.465987	-2.14281	0.0321282	0.194728	0.979283	BLOOD
RPL15	11872.6	-0.293421	0.137004	-2.1417	0.0322178	0.126094	1.84035	BLOOD
PDE4A	97.0826	-2.50244	1.16861	-2.14138	0.0322435	0.231818	0.732799	BLOOD
OSGEPL1	275.836	1.90939	0.892107	2.14032	0.032329	0.194923	0.979283	BLOOD
MCOLN2	352.228	-1.30772	0.611018	-2.14023	0.0323364	0.205334	0.897104	BLOOD
DNAH17	58.4045	2.72822	1.27522	2.13941	0.0324023	0.223596	0.781597	BLOOD
CDK19	109.217	1.65213	0.772381	2.13901	0.0324345	0.248745	0.667678	BLOOD
TCP11L2	368.874	2.00083	0.935489	2.13881	0.032451	0.195427	0.979283	BLOOD
ADAMTS6	126.436	-2.86266	1.33847	-2.13876	0.0324553	0.248745	0.667678	BLOOD
WWTR1	57.7695	-2.10159	0.983796	-2.13621	0.0326625	0.234376	0.732799	BLOOD
HS3ST1	50.294	4.74583	2.22421	2.13372	0.0328657	0.230851	0.751891	BLOOD
IVD	509.381	1.08508	0.508961	2.13196	0.0330105	0.222561	0.801994	BLOOD
RNPS1	1439.81	-0.58294	0.273459	-2.13173	0.0330291	0.128722	1.84451	BLOOD
DICER1	627.339	0.870012	0.408154	2.13158	0.0330414	0.222561	0.801994	BLOOD
CAMLG	811.284	-0.760294	0.356791	-2.13092	0.0330956	0.129102	1.84035	BLOOD
OAS2	1175.82	0.578812	0.271768	2.1298	0.0331881	0.141397	1.61771	BLOOD
ORMDL1	2849.33	0.445123	0.209034	2.12943	0.0332184	0.0965665	2.77365	BLOOD
ZNF853	50.5881	4.75141	2.23161	2.12914	0.0332427	0.252403	0.667678	BLOOD
ANKRD17	1432.39	0.603368	0.283415	2.12892	0.0332611	0.129285	1.84451	BLOOD
STX3	224.631	2.73991	1.28714	2.12868	0.0332809	0.343652	0.408145	BLOOD
UBP1	777.976	1.07513	0.505137	2.1284	0.0333037	0.141458	1.61771	BLOOD
SARS	2568.83	0.578737	0.272344	2.12502	0.0335848	0.130737	1.82762	BLOOD
WBP1	153.634	-1.48493	0.699214	-2.12371	0.0336944	0.225837	0.801994	BLOOD
USP32	239.526	1.38938	0.654228	2.12369	0.0336958	0.229696	0.781597	BLOOD
PMPCB	1471.79	0.692607	0.326164	2.12349	0.0337126	0.130626	1.84035	BLOOD
EIF2AK1	1096.3	0.76491	0.360507	2.12176	0.0338577	0.141397	1.65168	BLOOD
DYRK1A	694.968	1.22148	0.576047	2.12046	0.0339674	0.141458	1.65168	BLOOD
ZBTB41	199.04	1.7823	0.840541	2.12042	0.033971	0.227549	0.801994	BLOOD
DOCK9	449.156	1.32017	0.622722	2.12	0.0340057	0.173961	1.22107	BLOOD
MAP3K8	336.916	-2.30447	1.08722	-2.1196	0.0340397	0.211602	0.897104	BLOOD
NKRF	295.022	-1.10485	0.521254	-2.1196	0.03404	0.282027	0.567907	BLOOD
S100A10	3467.48	-0.422134	0.199212	-2.11902	0.034089	0.131415	1.84035	BLOOD
ACAD8	682.11	1.03275	0.48748	2.11854	0.0341291	0.228036	0.801994	BLOOD
PRELID1	527.174	-0.893271	0.421848	-2.11752	0.034216	0.174791	1.22107	BLOOD
CACNB2	85.5575	2.78714	1.31668	2.1168	0.0342771	0.23787	0.751891	BLOOD
CFAP44	351.306	2.19302	1.03618	2.11645	0.0343067	0.283636	0.567907	BLOOD
HIBADH	307.672	1.39209	0.658257	2.11482	0.0344457	0.21336	0.897104	BLOOD
POLR1B	361.151	1.60524	0.759341	2.11399	0.0345164	0.28511	0.567907	BLOOD
LRFN3	28.503	3.68924	1.7465	2.11236	0.0346556	0.842669	0.0776153	BLOOD
FAM3C	552.45	-1.37807	0.652713	-2.11129	0.0347471	0.180889	1.18766	BLOOD
JADE2	858.259	0.849426	0.402412	2.11084	0.0347865	0.139573	1.72544	BLOOD
ZNF782	61.4594	2.45284	1.16217	2.11057	0.0348093	0.229945	0.801994	BLOOD
2023-03-09	137.993	2.19956	1.04255	2.10978	0.0348769	0.234436	0.781597	BLOOD
RASD1	236.913	-2.70978	1.28472	-2.10923	0.0349243	0.354134	0.408145	BLOOD
AVIL	38.6294	3.38752	1.60642	2.10874	0.034967	1	0.0100266	BLOOD
TOMM40L	84.1023	2.80938	1.33249	2.10838	0.0349984	0.235004	0.781597	BLOOD
ICA1L	136.361	1.86074	0.882591	2.10827	0.0350077	0.354659	0.408145	BLOOD
ATXN7L3B	1623.24	0.621843	0.294956	2.10826	0.0350088	0.134323	1.82762	BLOOD
GOSR1	410.84	-0.877638	0.416548	-2.10693	0.0351236	0.287889	0.567907	BLOOD
CCT2	2205.91	-0.644138	0.305729	-2.10689	0.0351271	0.133931	1.84035	BLOOD
SLC29A3	235.948	-2.20379	1.04645	-2.10598	0.0352062	0.236057	0.781597	BLOOD
PPP4R1	483.889	1.13484	0.538917	2.10578	0.0352235	0.182718	1.18766	BLOOD
HES4	94.238	-3.32253	1.57886	-2.10439	0.0353448	0.262591	0.667678	BLOOD
TSHZ1	570.608	0.960436	0.456649	2.10323	0.0354458	0.205736	0.979283	BLOOD
SPPL2A	1005.93	-0.711693	0.338484	-2.10259	0.0355015	0.141458	1.72426	BLOOD
TNFSF4	26.1084	-3.55071	1.68933	-2.10185	0.0355664	0.791799	0.0909799	BLOOD
ERICH1	686.076	-0.815854	0.388209	-2.10158	0.0355897	0.183909	1.18766	BLOOD
SIRPG	1661.45	-0.552281	0.262849	-2.10114	0.0356288	0.135275	1.84451	BLOOD
BLOC1S6	783.518	-0.723228	0.344406	-2.09993	0.0357352	0.142071	1.72426	BLOOD
TIGD5	49.346	4.25998	2.03048	2.09802	0.0359037	0.799739	0.0903516	BLOOD
GATAD2B	1038.52	0.732292	0.349059	2.0979	0.0359136	0.142552	1.72544	BLOOD
ZNF106	1541.1	0.524705	0.250192	2.09721	0.0359748	0.101933	2.77365	BLOOD
TMEM251	60.0316	2.50113	1.19302	2.09647	0.0360408	0.246447	0.751891	BLOOD
OGFRL1	120.803	1.88568	0.899788	2.0957	0.0361092	0.250752	0.732799	BLOOD
RASSF1	1615.88	0.60682	0.289663	2.09491	0.0361786	0.137143	1.84035	BLOOD
DNAJC16	241.229	1.89308	0.903827	2.09452	0.0362137	0.236523	0.801994	BLOOD
COPS2	886.615	-0.825646	0.394369	-2.09359	0.0362968	0.143179	1.72426	BLOOD
ZNF687	208.973	-2.01968	0.965394	-2.09208	0.0364312	0.252202	0.732799	BLOOD
TASP1	412.157	1.00786	0.481888	2.09148	0.036485	0.237722	0.801994	BLOOD
RBM15B	259.725	1.64724	0.787738	2.0911	0.0365191	0.23783	0.801994	BLOOD
PSKH1	174.494	2.06698	0.988684	2.09064	0.0365602	0.267006	0.667678	BLOOD
CTSH	350.238	1.99759	0.95551	2.09061	0.0365635	0.209159	0.979283	BLOOD
HMGN1	2340.44	-0.462553	0.221344	-2.08974	0.0366407	0.138318	1.84035	BLOOD
LINC01138	39.499	-3.99895	1.914	-2.08932	0.036679	0.788583	0.0945096	BLOOD
SNRPB	1536.71	-0.596426	0.285566	-2.08858	0.0367458	0.142809	1.76003	BLOOD
TNKS1BP1	29.623	4.23661	2.02848	2.08857	0.0367469	1	0.0100266	BLOOD
HNRNPK	4978.79	-0.337437	0.161646	-2.0875	0.0368426	0.143005	1.76003	BLOOD
PEBP1	1926.02	-0.482882	0.231326	-2.08745	0.0368477	0.138478	1.84451	BLOOD
ANAPC2	421.981	1.15471	0.553353	2.08676	0.03691	0.254158	0.732799	BLOOD
PSMD2	1693.76	0.481971	0.230971	2.08672	0.0369136	0.143088	1.76003	BLOOD
PARP8	3608.38	0.71711	0.343685	2.08653	0.0369305	0.143088	1.76003	BLOOD
ENO1	7506.53	0.298556	0.143093	2.08645	0.0369382	0.139831	1.82762	BLOOD
CPSF1	495.24	1.12642	0.539888	2.08639	0.0369435	0.210597	0.979283	BLOOD
OS9	1357.62	-0.587432	0.28158	-2.0862	0.0369608	0.138812	1.84451	BLOOD
FBXO7	2457.92	0.555698	0.266408	2.08589	0.0369887	0.139933	1.82762	BLOOD
TTC37	1351.83	0.60825	0.291755	2.0848	0.0370875	0.140218	1.82762	BLOOD
USP47	2263.56	0.479207	0.229868	2.0847	0.0370963	0.143269	1.76003	BLOOD
PREX1	1172.99	0.598198	0.28703	2.0841	0.0371511	0.145728	1.72426	BLOOD
CD55	1462.59	0.569485	0.273439	2.08268	0.0372805	0.104649	2.77365	BLOOD
PSMB2	982.075	-0.633651	0.304285	-2.08243	0.0373032	0.15097	1.65168	BLOOD
CD46	3170.27	0.541463	0.26013	2.08151	0.0373875	0.104874	2.77365	BLOOD
ZBTB44	508.524	1.08871	0.52317	2.08098	0.0374355	0.186959	1.22107	BLOOD
ZFP1	98.0498	2.19043	1.05268	2.08082	0.0374505	0.256925	0.732799	BLOOD
CHP1	797.249	1.12057	0.538616	2.08047	0.0374827	0.15384	1.61771	BLOOD
ENTPD7	64.9637	3.54416	1.70405	2.07985	0.0375391	0.252638	0.751891	BLOOD
TMEM204	728.831	1.39956	0.672922	2.07983	0.0375416	0.146703	1.72544	BLOOD
2023-03-05	769.843	-0.996427	0.479191	-2.07939	0.0375814	0.146868	1.72426	BLOOD
LARP4B	831.454	0.977617	0.470371	2.0784	0.0376728	0.147061	1.72426	BLOOD
PRELID3B	912.151	-0.855987	0.411915	-2.07807	0.0377034	0.147061	1.72544	BLOOD
NOSIP	3442.93	0.460311	0.221545	2.07773	0.0377342	0.141397	1.84035	BLOOD
PPWD1	943.514	0.861082	0.414547	2.07716	0.0377866	0.152726	1.65168	BLOOD
NFKBIE	259.684	-2.12881	1.02523	-2.07641	0.0378557	0.302004	0.567907	BLOOD
ARPC3	2467.03	-0.495697	0.23873	-2.0764	0.0378574	0.141458	1.84035	BLOOD
ZC3H13	2010.25	0.640143	0.308345	2.07606	0.0378883	0.142071	1.82762	BLOOD
CAPS	161.884	1.93725	0.933505	2.07524	0.0379644	0.248745	0.781597	BLOOD
SAMSN1	1284.93	-0.865481	0.417058	-2.0752	0.0379676	0.141562	1.84035	BLOOD
NDUFB2	1102.48	-0.771389	0.371943	-2.07394	0.0380845	0.15319	1.65168	BLOOD
CNOT8	2126.72	0.475743	0.22939	2.07394	0.0380845	0.146227	1.76003	BLOOD
RNF167	1329.52	-0.722901	0.348589	-2.07379	0.0380989	0.146227	1.76003	BLOOD
HNRNPAB	627.259	-1.01955	0.492032	-2.07213	0.0382534	0.264373	0.712913	BLOOD
WDR81	115.391	2.86841	1.3843	2.0721	0.0382557	0.256022	0.751891	BLOOD
DUSP16	454.736	-1.13598	0.548312	-2.07179	0.0382855	0.192724	1.18766	BLOOD
INF2	230.882	2.50457	1.20926	2.07117	0.0383432	0.24616	0.801994	BLOOD
MORN4	27.3696	4.16051	2.01015	2.06975	0.0384754	0.886472	0.0776153	BLOOD
SRC	15.5993	-5.63101	2.72064	-2.06973	0.0384772	0.827142	0.0903516	BLOOD
IQGAP2	1355.37	0.636058	0.307448	2.06883	0.0385621	0.107324	2.77365	BLOOD
VAV3	237.124	1.1418	0.552183	2.06779	0.0386602	0.276269	0.667678	BLOOD
ABCG1	473.309	-1.20477	0.582763	-2.06735	0.0387014	0.247728	0.801994	BLOOD
WASHC1	168.465	-1.54671	0.748215	-2.0672	0.0387152	0.247728	0.801994	BLOOD
UST	77.5106	2.73444	1.32293	2.06696	0.0387384	0.276706	0.667678	BLOOD
TBC1D4	889.843	-0.76763	0.371717	-2.06509	0.0389144	0.150954	1.72426	BLOOD
SEMA4F	192.646	1.68895	0.818141	2.06437	0.0389824	0.248745	0.801994	BLOOD
C15orf61	285.329	-1.10714	0.536384	-2.06408	0.0390099	0.229945	0.897104	BLOOD
MANEA	163.791	-1.99598	0.967046	-2.064	0.0390179	0.379573	0.408145	BLOOD
SFMBT2	230.171	-1.75593	0.851231	-2.06282	0.0391299	0.278502	0.667678	BLOOD
ZBTB46	82.3037	2.36502	1.14716	2.06163	0.0392432	0.249691	0.801994	BLOOD
INPPL1	209.586	2.00477	0.972797	2.06083	0.0393193	0.279286	0.667678	BLOOD
BRWD3	251.263	-1.21412	0.58919	-2.06066	0.0393354	0.381885	0.408145	BLOOD
BOD1	140.14	2.16373	1.05009	2.06051	0.0393496	0.264449	0.732799	BLOOD
SBK1	141.466	2.24012	1.08724	2.06038	0.0393618	0.254158	0.781597	BLOOD
FKTN	70.4229	2.31737	1.12533	2.05928	0.0394678	0.264764	0.732799	BLOOD
BAP1	609.739	1.1356	0.551508	2.05909	0.0394861	0.195805	1.18766	BLOOD
ANXA7	1979.39	0.580674	0.282035	2.05887	0.0395066	0.109163	2.77365	BLOOD
PDCD5	710.102	-0.678215	0.329513	-2.05823	0.0395676	0.152726	1.72544	BLOOD
GRAMD1A	750.902	0.854683	0.415303	2.05797	0.0395926	0.159768	1.61771	BLOOD
DUT	1089.86	-0.551282	0.267915	-2.05768	0.0396209	0.152726	1.72544	BLOOD
FPGT	30.147	3.78491	1.8397	2.05735	0.0396526	0.821661	0.0945096	BLOOD
PPP2R2D	493.585	0.867039	0.421452	2.05727	0.0396607	0.251521	0.801994	BLOOD
YLPM1	1340.06	0.898111	0.436599	2.05706	0.0396804	0.109445	2.77365	BLOOD
ARL3	362.866	-1.09176	0.530917	-2.05637	0.0397473	0.266006	0.732799	BLOOD
KIF16B	172.842	2.2199	1.0796	2.05623	0.0397605	0.266006	0.732799	BLOOD
MAP3K12	229.868	2.17007	1.05598	2.05502	0.0398768	0.252202	0.801994	BLOOD
TTL	126.56	2.25237	1.09694	2.05332	0.0400419	0.252638	0.801994	BLOOD
ATXN2	845.341	0.974636	0.474701	2.05316	0.0400572	0.154049	1.72544	BLOOD
CPT2	175.744	2.17324	1.05879	2.05257	0.0401145	0.257662	0.781597	BLOOD
PLAGL2	201.909	1.91429	0.93277	2.05226	0.0401443	0.386358	0.408145	BLOOD
CCR2	578.221	1.98685	0.968348	2.05179	0.04019	0.253454	0.801994	BLOOD
SPINT1	14.2984	-5.54253	2.70392	-2.04981	0.0403831	1	0.0100266	BLOOD
CMPK2	52.0968	-2.83196	1.38192	-2.0493	0.0404332	0.254161	0.801994	BLOOD
SHISA4	14.748	-5.57491	2.72068	-2.04909	0.0404536	0.829247	0.0945096	BLOOD
VPS4B	786.106	-0.854934	0.417519	-2.04765	0.0405942	0.160248	1.65168	BLOOD
NCAPD3	533.285	0.792265	0.387088	2.04673	0.0406847	0.255504	0.801994	BLOOD
SLC29A1	67.1572	-3.5004	1.71046	-2.04647	0.0407104	0.285687	0.667678	BLOOD
SLC2A13	71.1389	2.36098	1.15371	2.04642	0.0407152	0.285687	0.667678	BLOOD
TMEM170A	737.595	-0.641395	0.313428	-2.04639	0.0407185	0.162793	1.61771	BLOOD
UBN1	423.03	1.23708	0.604529	2.04635	0.0407217	0.316047	0.567907	BLOOD
ZNF436	264.933	1.40606	0.687456	2.0453	0.040825	0.270202	0.732799	BLOOD
HNRNPA0	1270.62	-0.50397	0.246505	-2.04446	0.040908	0.149044	1.84035	BLOOD
TFR2	27.9954	3.71319	1.81693	2.04365	0.0409877	0.832525	0.0945096	BLOOD
LY9	2163.52	0.520442	0.254679	2.04352	0.041001	0.150146	1.82762	BLOOD
RNF7	1070.02	-0.792888	0.388144	-2.04277	0.0410757	0.163494	1.61771	BLOOD
PIF1	78.4602	-3.87604	1.8977	-2.0425	0.0411023	0.287166	0.667678	BLOOD
NPIPB5	78.4602	-3.87604	1.8977	-2.0425	0.0411023	0.2615	0.781597	BLOOD
CCDC144A	78.4602	-3.87604	1.8977	-2.0425	0.0411023	0.266917	0.751891	BLOOD
FBXO46	70.3408	2.48814	1.21852	2.04193	0.0411582	0.267006	0.751891	BLOOD
NDUFAF7	481.241	1.06277	0.520559	2.04159	0.0411926	0.197237	1.22107	BLOOD
MLC1	34.5557	3.56565	1.74663	2.04145	0.0412066	0.834466	0.0945096	BLOOD
NUS1	161.609	-1.25403	0.614356	-2.04121	0.0412303	0.392556	0.408145	BLOOD
ZNF736	83.3063	-2.5755	1.26205	-2.04073	0.0412778	0.258152	0.801994	BLOOD
RMDN2	50.3842	2.99454	1.46779	2.04016	0.0413339	0.26746	0.751891	BLOOD
ZMYM1	337.387	1.52354	0.746937	2.03971	0.041379	0.319331	0.567907	BLOOD
PXMP4	147.698	1.74901	0.857557	2.03953	0.0413971	0.258421	0.801994	BLOOD
SLC17A9	67.2759	3.62265	1.77648	2.03923	0.0414268	0.272795	0.732799	BLOOD
REC8	402.814	1.01478	0.497678	2.03902	0.0414481	0.25862	0.801994	BLOOD
RAB8B	1149.98	-0.945149	0.463647	-2.03851	0.041499	0.162649	1.65168	BLOOD
RWDD2B	316.868	1.44322	0.708203	2.03786	0.0415635	0.240669	0.897104	BLOOD
KCNK6	224.665	-1.24011	0.608714	-2.03726	0.041624	0.263584	0.781597	BLOOD
ZNF500	119.451	1.92676	0.94593	2.03689	0.041661	0.263698	0.781597	BLOOD
NDUFS3	865.389	0.639211	0.313972	2.03589	0.0417618	0.158927	1.72544	BLOOD
AC144521.1	45.5634	4.65081	2.28446	2.03585	0.0417656	0.839819	0.0945096	BLOOD
IL10RB	88.1498	-1.6214	0.796497	-2.03567	0.0417836	0.289688	0.667678	BLOOD
INO80B	52.5098	-2.3607	1.15978	-2.03547	0.0418039	0.260481	0.801994	BLOOD
RRP12	172.543	-1.63934	0.806004	-2.03391	0.0419611	0.290176	0.667678	BLOOD
TRIM26	616.758	-0.969754	0.476853	-2.03365	0.0419867	0.279286	0.712913	BLOOD
ZNF839	161.196	1.95166	0.959862	2.03327	0.042025	0.261378	0.801994	BLOOD
SPATA5L1	222.513	1.31374	0.646175	2.0331	0.0420423	0.274947	0.732799	BLOOD
NFATC1	940.802	-0.700072	0.34435	-2.03302	0.0420503	0.159352	1.72544	BLOOD
TAPBP	3496.42	-0.482429	0.237301	-2.03298	0.0420544	0.114841	2.77365	BLOOD
BCL9L	264.433	1.37051	0.674457	2.03202	0.0421515	0.322319	0.567907	BLOOD
TSPAN14	2248.73	0.625667	0.308063	2.03097	0.0422577	0.152726	1.84451	BLOOD
SERBP1	1331.25	-0.632349	0.311375	-2.03083	0.0422724	0.152726	1.84035	BLOOD
BAZ1A	2195.74	-0.53961	0.265815	-2.03002	0.0423547	0.152726	1.84451	BLOOD
SNHG15	768.037	-0.893353	0.440282	-2.02905	0.0424535	0.165112	1.65168	BLOOD
UBE2H	619.276	0.818605	0.403563	2.02845	0.0425148	0.204347	1.18766	BLOOD
GNB2	621.098	-0.872746	0.430309	-2.02819	0.0425413	0.229945	0.979283	BLOOD
RNASEL	535.631	1.25887	0.620742	2.02801	0.042559	0.229945	0.979283	BLOOD
MPST	154.915	-1.70897	0.842858	-2.02759	0.0426024	0.266702	0.781597	BLOOD
CEP192	378.231	1.56567	0.772958	2.02555	0.0428105	0.263962	0.801994	BLOOD
KIF20B	546.503	-0.919601	0.454021	-2.02546	0.0428202	0.20203	1.22107	BLOOD
FBXO3	670.627	1.15143	0.568519	2.02531	0.0428352	0.282588	0.712913	BLOOD
CCNT2	1473.85	0.563892	0.278434	2.02522	0.0428444	0.159352	1.76003	BLOOD
MRPL34	474.682	-0.753179	0.371959	-2.0249	0.0428778	0.264066	0.801994	BLOOD
TMEM168	542.115	1.00692	0.497333	2.02464	0.0429043	0.264066	0.801994	BLOOD
PTDSS1	1593.7	0.592759	0.292787	2.02454	0.0429143	0.154288	1.84451	BLOOD
ZNF655	2165.95	0.633153	0.312774	2.02431	0.042938	0.159352	1.76003	BLOOD
POLR1E	497.411	-1.04673	0.51731	-2.0234	0.0430315	0.231639	0.979283	BLOOD
CYP2E1	31.7676	4.30374	2.12708	2.02331	0.0430412	0.852993	0.0945096	BLOOD
YIPF5	922.549	-0.638437	0.315576	-2.02309	0.0430641	0.161938	1.72544	BLOOD
DHCR24	13.7951	-5.50365	2.72074	-2.02285	0.0430882	0.934045	0.0776153	BLOOD
ZNF845	143.618	2.14913	1.06252	2.02268	0.0431063	0.268113	0.781597	BLOOD
[truncated: 30,609 more rows]

## Sheet: ILC2_c1
gene_id	baseMean	log2FoldChange	lfcSE	stat	pvalue	padj	weight	comparison
RPL41	23419	-7.43666	0.245391	-30.3054	9.72979e-202	3.51938e-198	2.92829	BLOOD_vs_HCC
MTRNR2L8	5922.31	-11.3578	0.39652	-28.6437	1.92264e-180	3.49472e-177	2.91363	BLOOD_vs_HCC
HSPA1A	11823.2	-9.49798	0.347849	-27.3049	3.70821e-164	4.47102e-161	2.92829	BLOOD_vs_HCC
RPL39	11477	-8.4151	0.316945	-26.5507	2.52075e-155	2.52234e-152	2.64633	BLOOD_vs_HCC
FTH1	12556.6	-8.99474	0.366707	-24.5284	7.34943e-133	5.91924e-130	2.63024	BLOOD_vs_HCC
RPL21	4388.57	-7.52833	0.326579	-23.0521	1.4017e-117	8.39518e-115	2.9475	BLOOD_vs_HCC
EEF1G	2158.41	-11.4339	0.505003	-22.6413	1.698e-113	8.88559e-111	2.64633	BLOOD_vs_HCC
RPL18A	8707.72	-6.24231	0.275786	-22.6346	1.97812e-113	8.88559e-111	2.9475	BLOOD_vs_HCC
RPS27	11163.6	-5.95889	0.265336	-22.4579	1.07091e-111	4.27598e-109	2.9475	BLOOD_vs_HCC
RPL29	8385.91	-5.9449	0.270807	-21.9526	8.18518e-107	2.96068e-104	2.92829	BLOOD_vs_HCC
HSPB1	3765.9	-9.16542	0.426477	-21.491	1.88962e-102	6.91776e-100	2.63024	BLOOD_vs_HCC
RPL28	16420	-6.92669	0.323262	-21.4275	7.40764e-102	2.48589e-99	2.63024	BLOOD_vs_HCC
RPS15A	10277.9	-7.20091	0.341081	-21.112	6.17179e-99	1.90021e-96	2.64633	BLOOD_vs_HCC
RPL12	10322.5	-5.51336	0.265847	-20.7388	1.54698e-95	4.42272e-93	2.64633	BLOOD_vs_HCC
EEF1A1	31292.6	-4.64153	0.234452	-19.7973	3.13883e-87	7.56902e-85	2.92829	BLOOD_vs_HCC
RPS12	14124.4	-5.02152	0.256613	-19.5685	2.87227e-85	7.22916e-83	2.63024	BLOOD_vs_HCC
RPS8	12955.1	-5.31646	0.273981	-19.4045	7.07323e-84	1.67553e-81	2.63024	BLOOD_vs_HCC
MIF	1873.48	-8.00364	0.442524	-18.0863	4.08302e-73	8.20488e-71	2.92829	BLOOD_vs_HCC
RPS3A	7246.37	-7.48827	0.435148	-17.2085	2.29113e-66	4.36173e-64	2.92829	BLOOD_vs_HCC
HSPD1	6556.74	-5.39581	0.32214	-16.7499	5.67247e-63	1.14216e-60	2.63024	BLOOD_vs_HCC
RPL30	13458.6	-4.26107	0.256361	-16.6214	4.88009e-62	9.35818e-60	2.63024	BLOOD_vs_HCC
RPS7	6646.62	-5.77294	0.348263	-16.5764	1.03277e-61	1.87895e-59	2.64633	BLOOD_vs_HCC
RPL37	10886.3	-4.71143	0.28692	-16.4207	1.3594e-60	2.36566e-58	2.64633	BLOOD_vs_HCC
RPL17	3749	-6.58493	0.403096	-16.3359	5.48337e-60	8.26418e-58	2.92829	BLOOD_vs_HCC
RPS27A	10269.2	-4.98879	0.306417	-16.281	1.34573e-59	1.95687e-57	2.91363	BLOOD_vs_HCC
RPL26	6086.26	-5.14634	0.316972	-16.2359	2.80942e-59	3.90846e-57	2.92829	BLOOD_vs_HCC
RPS2	8869.92	-4.9103	0.306439	-16.0237	8.72598e-58	1.17488e-55	2.91363	BLOOD_vs_HCC
RPS21	6245.7	-4.79298	0.305211	-15.7038	1.42457e-55	1.82831e-53	2.9475	BLOOD_vs_HCC
HSPE1	2440.88	-5.89668	0.382491	-15.4165	1.26773e-53	1.74969e-51	2.64633	BLOOD_vs_HCC
RPL7A	7094.22	-4.51158	0.296027	-15.2404	1.90617e-52	2.54316e-50	2.64633	BLOOD_vs_HCC
RPL14	6227.45	-4.50145	0.298411	-15.0847	2.04223e-51	2.39489e-49	2.91363	BLOOD_vs_HCC
RPL34	13255.6	-4.21678	0.28374	-14.8614	5.86778e-50	6.66603e-48	2.91363	BLOOD_vs_HCC
PPDPF	2031.65	-7.34069	0.502352	-14.6126	2.3329e-48	2.56996e-46	2.91363	BLOOD_vs_HCC
HSP90AA1	14974.1	-3.85429	0.268758	-14.3411	1.21109e-46	1.42571e-44	2.64633	BLOOD_vs_HCC
PHLDA1	1775.8	-6.55892	0.459156	-14.2848	2.72362e-46	2.79611e-44	2.91363	BLOOD_vs_HCC
RPS26	6659.16	-7.25512	0.507946	-14.2833	2.78287e-46	2.79611e-44	2.92829	BLOOD_vs_HCC
RPS23	8920.5	-3.91849	0.275389	-14.2289	6.06003e-46	5.92429e-44	2.92829	BLOOD_vs_HCC
RPL24	4369.07	-4.4835	0.315346	-14.2177	7.11287e-46	6.80464e-44	2.91363	BLOOD_vs_HCC
RPL23A	3805.3	-4.64869	0.327634	-14.1887	1.07657e-45	9.98482e-44	2.92829	BLOOD_vs_HCC
RPS24	9036.08	-4.22353	0.299767	-14.0894	4.41501e-45	4.41779e-43	2.64633	BLOOD_vs_HCC
RPS15	7942.41	-5.75743	0.410293	-14.0325	9.86496e-45	8.64641e-43	2.9475	BLOOD_vs_HCC
RPL32	13163.8	-4.53641	0.323643	-14.0167	1.23225e-44	1.17431e-42	2.64633	BLOOD_vs_HCC
UBC	3766.69	-5.44192	0.392541	-13.8633	1.05687e-43	9.83758e-42	2.64633	BLOOD_vs_HCC
RPLP1	22883.5	-4.82306	0.360948	-13.3622	1.00523e-40	9.20019e-39	2.63024	BLOOD_vs_HCC
RPL35A	8142.84	-3.85133	0.288683	-13.3411	1.33564e-40	1.18799e-38	2.64633	BLOOD_vs_HCC
RPS29	5850.29	-4.39524	0.338296	-12.9923	1.35347e-38	1.06428e-36	2.92829	BLOOD_vs_HCC
RPL35	4342.75	-4.73296	0.36554	-12.9478	2.4163e-38	1.84747e-36	2.9475	BLOOD_vs_HCC
RPL36	7477.58	-4.16541	0.325147	-12.8109	1.42557e-37	1.06726e-35	2.9475	BLOOD_vs_HCC
GABARAP	675.576	-8.79697	0.697406	-12.6138	1.77139e-36	1.3142e-34	2.91363	BLOOD_vs_HCC
FAU	6590.77	-3.92742	0.312133	-12.5825	2.6357e-36	1.89431e-34	2.9475	BLOOD_vs_HCC
RPS25	6019.11	-3.77915	0.306422	-12.3331	6.00555e-35	4.25938e-33	2.92829	BLOOD_vs_HCC
SRGN	10139	-4.51141	0.370344	-12.1817	3.89214e-34	2.721e-32	2.91363	BLOOD_vs_HCC
RPL7	2242.11	-7.81085	0.647078	-12.0709	1.50396e-33	1.14273e-31	2.63024	BLOOD_vs_HCC
PTMA	6532.96	-5.50099	0.457166	-12.0328	2.38899e-33	1.60024e-31	2.92829	BLOOD_vs_HCC
DUSP4	584.853	-10.8127	0.923979	-11.7023	1.23988e-31	8.17644e-30	2.92032	BLOOD_vs_HCC
NME2	845.007	-15.7635	1.35574	-11.6272	2.99745e-31	1.94584e-29	2.91363	BLOOD_vs_HCC
RPL13	17155.1	-3.74819	0.323273	-11.5945	4.39352e-31	3.104e-29	2.63024	BLOOD_vs_HCC
H3F3A	1601.74	-7.30882	0.647998	-11.2791	1.66488e-29	1.13635e-27	2.63024	BLOOD_vs_HCC
RPL10	25421.2	-5.07073	0.449631	-11.2775	1.69411e-29	1.06184e-27	2.91363	BLOOD_vs_HCC
RPS13	9127.77	-3.2402	0.295845	-10.9523	6.47563e-28	4.27499e-26	2.63024	BLOOD_vs_HCC
RPS18	9859.46	-3.19387	0.291842	-10.9438	7.11279e-28	4.27499e-26	2.91363	BLOOD_vs_HCC
RPSA	4192.17	-4.13091	0.381117	-10.839	2.25026e-27	1.31943e-25	2.91363	BLOOD_vs_HCC
RPL37A	6778.61	-3.37326	0.312472	-10.7954	3.61908e-27	2.07789e-25	2.92829	BLOOD_vs_HCC
TPT1	12200	-2.90499	0.270259	-10.7489	5.99728e-27	3.77361e-25	2.63024	BLOOD_vs_HCC
ZFP36L2	13287.8	-3.92092	0.366545	-10.697	1.05174e-26	6.51597e-25	2.63024	BLOOD_vs_HCC
AREG	1044.07	-6.94601	0.665582	-10.436	1.69837e-25	9.30791e-24	2.92829	BLOOD_vs_HCC
RPL38	3625.02	-3.71714	0.358286	-10.3748	3.22906e-25	1.74327e-23	2.92829	BLOOD_vs_HCC
MALAT1	140344	-2.62353	0.25366	-10.3427	4.51623e-25	2.38667e-23	2.9475	BLOOD_vs_HCC
EEF1D	2399.22	-4.36486	0.424152	-10.2908	7.75317e-25	4.49743e-23	2.64633	BLOOD_vs_HCC
CKLF	585.298	-6.98221	0.681279	-10.2487	1.1998e-24	5.92786e-23	3.0626	BLOOD_vs_HCC
DNAJB1	3113.38	-3.53443	0.350999	-10.0696	7.52557e-24	3.80896e-22	2.9475	BLOOD_vs_HCC
TMSB4X	10079.6	-2.65972	0.264272	-10.0644	7.9404e-24	4.41412e-22	2.64633	BLOOD_vs_HCC
RPL19	14257.2	-2.96927	0.296006	-10.0311	1.11255e-23	5.54041e-22	2.91363	BLOOD_vs_HCC
MT-CYB	67869.2	2.34394	0.233729	10.0284	1.14311e-23	5.5511e-22	2.9475	BLOOD_vs_HCC
RNASEK	889.555	-7.04427	0.716201	-9.83562	7.90821e-23	4.24619e-21	2.63024	BLOOD_vs_HCC
GAPDH	4942.21	-3.01356	0.311749	-9.66661	4.17977e-22	2.20127e-20	2.64633	BLOOD_vs_HCC
RPL11	15420.9	-2.81771	0.291654	-9.66114	4.40912e-22	2.29189e-20	2.64633	BLOOD_vs_HCC
REL	1510.5	-5.71369	0.594114	-9.61717	6.76641e-22	3.13781e-20	2.92829	BLOOD_vs_HCC
ARL6IP4	377.695	-7.83362	0.81683	-9.59027	8.7856e-22	3.72377e-20	3.16329	BLOOD_vs_HCC
MT-ND4	46536.3	2.58185	0.269461	9.58153	9.56183e-22	4.29513e-20	2.9475	BLOOD_vs_HCC
TSPYL2	1861.57	-3.99038	0.419502	-9.51218	1.86708e-21	9.22596e-20	2.64633	BLOOD_vs_HCC
CHCHD10	570.199	-6.60949	0.709136	-9.32048	1.15812e-20	4.88456e-19	3.0626	BLOOD_vs_HCC
VIM	11174.6	-3.11127	0.337126	-9.2288	2.73682e-20	1.32786e-18	2.63024	BLOOD_vs_HCC
IL32	12575.1	-2.50166	0.272199	-9.19054	3.90865e-20	1.86244e-18	2.64633	BLOOD_vs_HCC
CRIP1	1626.26	-7.04846	0.780585	-9.02971	1.72123e-19	8.05977e-18	2.63024	BLOOD_vs_HCC
TNFAIP3	6207.31	-4.4314	0.491169	-9.02215	1.84434e-19	7.88796e-18	2.91363	BLOOD_vs_HCC
SOCS1	688.855	-7.43864	0.825174	-9.01464	1.97527e-19	9.14303e-18	2.63024	BLOOD_vs_HCC
RPLP2	8914.87	-3.22401	0.35892	-8.98253	2.64611e-19	1.09312e-17	2.91363	BLOOD_vs_HCC
RPL22	4220.17	-4.52495	0.505079	-8.9589	3.27937e-19	1.33279e-17	2.92829	BLOOD_vs_HCC
RPL18	10523.6	-2.4374	0.272543	-8.94318	3.78135e-19	1.50983e-17	2.9475	BLOOD_vs_HCC
HLA-A	13175.3	-2.66331	0.299555	-8.8909	6.06183e-19	2.66622e-17	2.64633	BLOOD_vs_HCC
NFKBIZ	2663.46	-5.67655	0.652445	-8.70043	3.30635e-18	1.29147e-16	2.9475	BLOOD_vs_HCC
EEF1B2	3040.19	-3.54137	0.407966	-8.68056	3.93809e-18	1.52169e-16	2.9475	BLOOD_vs_HCC
MT2A	1155.72	-7.54789	0.885597	-8.52293	1.55564e-17	5.98612e-16	2.92829	BLOOD_vs_HCC
C12orf57	574.91	-5.56491	0.655466	-8.49	2.06629e-17	7.51621e-16	3.06512	BLOOD_vs_HCC
MT-ND5	33014.9	3.1369	0.37023	8.47282	2.39522e-17	9.07022e-16	2.91363	BLOOD_vs_HCC
NACA	5222.83	-2.52832	0.300423	-8.41586	3.90033e-17	1.46175e-15	2.91363	BLOOD_vs_HCC
RPL10A	4715.61	-2.99142	0.356265	-8.3966	4.59605e-17	1.69638e-15	2.92829	BLOOD_vs_HCC
PLIN2	2197.96	-3.27295	0.394267	-8.30134	1.02941e-16	4.18731e-15	2.63024	BLOOD_vs_HCC
BAG3	242.318	-13.9614	1.6871	-8.27539	1.28036e-16	1.93793e-14	0.672881	BLOOD_vs_HCC
MT-ND3	3176.65	-2.9183	0.353657	-8.25179	1.56039e-16	5.64412e-15	2.92829	BLOOD_vs_HCC
NDUFV2	927.261	-5.67201	0.687979	-8.24446	1.6591e-16	5.90306e-15	2.9475	BLOOD_vs_HCC
RPS9	3367.49	-3.05258	0.375512	-8.12914	4.32363e-16	1.50847e-14	2.9475	BLOOD_vs_HCC
RPS10	520.696	-5.97766	0.735902	-8.1229	4.55166e-16	1.4942e-14	3.16329	BLOOD_vs_HCC
ALDOA	223.678	-13.8459	1.72306	-8.03567	9.30689e-16	1.2523e-13	0.709168	BLOOD_vs_HCC
RPL8	13728.9	-2.21136	0.275817	-8.01747	1.07947e-15	3.73737e-14	2.91363	BLOOD_vs_HCC
FTL	9781.26	-2.36571	0.296258	-7.98531	1.40169e-15	4.7831e-14	2.92829	BLOOD_vs_HCC
HLA-C	14298.4	-2.20998	0.27785	-7.95384	1.80814e-15	6.11241e-14	2.92829	BLOOD_vs_HCC
S100A6	4479.47	-3.17244	0.399031	-7.95037	1.85958e-15	6.25942e-14	2.91363	BLOOD_vs_HCC
RPLP0	10613.5	-2.57465	0.32592	-7.89964	2.79705e-15	1.01775e-13	2.64633	BLOOD_vs_HCC
RPS4X	11059.5	-2.11605	0.268055	-7.89409	2.92437e-15	9.7044e-14	2.92829	BLOOD_vs_HCC
RPS19	12003.4	-2.76761	0.351999	-7.86256	3.76371e-15	1.34503e-13	2.64633	BLOOD_vs_HCC
HES4	286.121	-11.2369	1.42985	-7.85882	3.87778e-15	5.12546e-13	0.709168	BLOOD_vs_HCC
SCN2A	198.825	-13.676	1.78041	-7.68139	1.57375e-14	9.22051e-12	0.149408	BLOOD_vs_HCC
RPS28	9216.23	-8.60809	1.12531	-7.64952	2.01735e-14	6.4009e-13	2.92829	BLOOD_vs_HCC
ZNF331	931.461	-4.37906	0.575617	-7.6076	2.79223e-14	8.72526e-13	2.9475	BLOOD_vs_HCC
NAMPT	697.301	-4.8975	0.645906	-7.58237	3.39307e-14	1.17793e-12	2.63024	BLOOD_vs_HCC
SELL	9937.11	4.51374	0.60253	7.49131	6.81876e-14	2.09432e-12	2.9475	BLOOD_vs_HCC
XCL2	198.926	-12.0171	1.62218	-7.40801	1.28208e-13	6.83388e-11	0.149408	BLOOD_vs_HCC
HSPH1	3511.66	-3.45718	0.467441	-7.39597	1.4038e-13	4.72164e-12	2.64633	BLOOD_vs_HCC
PCBP2	1533.32	-3.32851	0.450259	-7.39244	1.44158e-13	4.41896e-12	2.92829	BLOOD_vs_HCC
DUSP2	625.439	-7.44465	1.0158	-7.32886	2.32122e-13	6.3891e-12	3.20681	BLOOD_vs_HCC
SLC2A3	1452.54	-3.91266	0.537266	-7.28253	3.27611e-13	9.71319e-12	2.92829	BLOOD_vs_HCC
CREM	747.166	-6.04044	0.830331	-7.27474	3.47098e-13	1.01924e-11	2.91363	BLOOD_vs_HCC
KRTCAP2	573.827	-4.73471	0.651466	-7.26778	3.65434e-13	1.01924e-11	3.0626	BLOOD_vs_HCC
RPS17	1296.33	-4.49031	0.618318	-7.26214	3.81e-13	1.22743e-11	2.63024	BLOOD_vs_HCC
RPS20	2663.53	-2.87163	0.396979	-7.2337	4.69993e-13	1.49298e-11	2.64633	BLOOD_vs_HCC
RPS14	13601.9	-2.30745	0.320168	-7.20698	5.72044e-13	1.80285e-11	2.64633	BLOOD_vs_HCC
NFKBIA	8599.33	-3.10433	0.432236	-7.18203	6.86862e-13	2.1478e-11	2.64633	BLOOD_vs_HCC
ATF3	167.759	-13.4309	1.87316	-7.17019	7.48956e-13	2.43813e-10	0.230759	BLOOD_vs_HCC
ARPC1B	1018.27	-4.21202	0.587771	-7.1661	7.71648e-13	2.16368e-11	2.92829	BLOOD_vs_HCC
NDUFA13	538.784	-4.94649	0.698781	-7.07874	1.45466e-12	3.86995e-11	3.0626	BLOOD_vs_HCC
HNRNPA1	2502.48	-2.69154	0.382709	-7.03285	2.0235e-12	5.55082e-11	2.9475	BLOOD_vs_HCC
UBB	1829.52	-3.09778	0.440831	-7.02714	2.10805e-12	5.73895e-11	2.9475	BLOOD_vs_HCC
RPL36AL	2406.63	-3.00676	0.4312	-6.97301	3.10228e-12	8.31956e-11	2.9475	BLOOD_vs_HCC
RPS16	5216.44	-2.3981	0.346923	-6.91249	4.76222e-12	1.26765e-10	2.9475	BLOOD_vs_HCC
CACYBP	1172.4	-3.35963	0.486029	-6.9124	4.76526e-12	1.40071e-10	2.63024	BLOOD_vs_HCC
KLF6	7818.93	-2.25104	0.326044	-6.90412	5.05167e-12	1.33481e-10	2.9475	BLOOD_vs_HCC
PNRC1	1837.82	-3.22526	0.4681	-6.89011	5.57479e-12	1.46121e-10	2.92829	BLOOD_vs_HCC
RGCC	1160.29	-5.61173	0.817203	-6.867	6.55668e-12	1.888e-10	2.64633	BLOOD_vs_HCC
C6orf62	2944.41	4.69992	0.689017	6.82121	9.02796e-12	2.34426e-10	2.91363	BLOOD_vs_HCC
DDT	246.421	-7.4446	1.09414	-6.80405	1.0172e-11	1.07555e-09	0.686119	BLOOD_vs_HCC
SQSTM1	1854.32	-2.74119	0.405534	-6.75945	1.38513e-11	3.90422e-10	2.64633	BLOOD_vs_HCC
AHR	904.775	-4.03154	0.60182	-6.69892	2.09971e-11	5.33786e-10	2.91363	BLOOD_vs_HCC
PPIB	2181.69	-2.54644	0.382418	-6.65879	2.76094e-11	7.72107e-10	2.63024	BLOOD_vs_HCC
MZT2B	300.845	-5.82992	0.876115	-6.65428	2.84688e-11	2.91054e-09	0.700022	BLOOD_vs_HCC
HCST	803.924	-4.47987	0.674949	-6.63735	3.19383e-11	8.87005e-10	2.63024	BLOOD_vs_HCC
COX7C	1937.44	-2.95982	0.452343	-6.54329	6.0179e-11	1.64858e-09	2.63024	BLOOD_vs_HCC
PPIA	1995.4	-2.96567	0.461615	-6.42456	1.32255e-10	3.57444e-09	2.63024	BLOOD_vs_HCC
RAD50	130.479	-13.0683	2.03433	-6.42389	1.32835e-10	5.6054e-08	0.149408	BLOOD_vs_HCC
LDHB	7301.34	2.18986	0.341769	6.40744	1.47983e-10	3.58644e-09	2.91363	BLOOD_vs_HCC
CYBA	1177.42	-3.20563	0.501036	-6.39801	1.57417e-10	3.78982e-09	2.91363	BLOOD_vs_HCC
HSP90AB1	8880.18	-2.19328	0.345718	-6.34414	2.23678e-10	5.81348e-09	2.64633	BLOOD_vs_HCC
YBX1	1327.76	-3.90604	0.616763	-6.33313	2.40244e-10	5.71705e-09	2.92829	BLOOD_vs_HCC
TMSB10	6019.69	-2.04529	0.323112	-6.32998	2.45199e-10	5.75907e-09	2.9475	BLOOD_vs_HCC
ZFP36	4681.58	-3.92344	0.622209	-6.30566	2.86963e-10	6.69665e-09	2.92829	BLOOD_vs_HCC
FABP5	205.443	-10.3207	1.63961	-6.29462	3.08148e-10	8.11877e-08	0.231046	BLOOD_vs_HCC
RPL27	3274.52	-2.35311	0.375047	-6.27418	3.5149e-10	8.19091e-09	2.91363	BLOOD_vs_HCC
RPS3	13973	-1.79732	0.286822	-6.26634	3.69644e-10	9.42127e-09	2.63024	BLOOD_vs_HCC
EMD	663.312	-4.22181	0.674153	-6.26239	3.79127e-10	8.7347e-09	2.92829	BLOOD_vs_HCC
NDUFA7	162.396	-8.99685	1.43883	-6.2529	4.02894e-10	1.05675e-07	0.230759	BLOOD_vs_HCC
UBA52	4094.8	-2.22147	0.355559	-6.24781	4.16242e-10	9.51685e-09	2.91363	BLOOD_vs_HCC
CYCS	932.168	-3.52618	0.568843	-6.19887	5.68703e-10	1.43136e-08	2.63024	BLOOD_vs_HCC
GIMAP7	3469.68	3.2423	0.525015	6.17564	6.5898e-10	1.48796e-08	2.91363	BLOOD_vs_HCC
CYP51A1	286.346	-6.9509	1.12602	-6.173	6.70048e-10	5.89445e-08	0.700022	BLOOD_vs_HCC
IL2RG	2239.66	-2.4558	0.398546	-6.1619	7.1879e-10	1.60491e-08	2.92829	BLOOD_vs_HCC
PPP1R15A	1559.61	-2.928	0.479652	-6.10442	1.03178e-09	2.54907e-08	2.63024	BLOOD_vs_HCC
SUMO2	784.692	-3.5137	0.576668	-6.09311	1.10735e-09	2.71908e-08	2.63024	BLOOD_vs_HCC
HMGB1	1685.22	-2.71151	0.446468	-6.07325	1.25344e-09	2.74779e-08	2.92829	BLOOD_vs_HCC
BTG1	8002.07	-2.89688	0.479918	-6.03619	1.57792e-09	3.82788e-08	2.63024	BLOOD_vs_HCC
C4orf48	233.06	-6.16072	1.0237	-6.01806	1.76516e-09	2.99074e-07	0.332526	BLOOD_vs_HCC
POLR2L	608.802	-3.83898	0.638703	-6.01059	1.84847e-09	3.82809e-08	3.0626	BLOOD_vs_HCC
COX6A1	752.568	-3.67093	0.615085	-5.96817	2.39922e-09	5.64879e-08	2.64633	BLOOD_vs_HCC
HSPA5	4110.6	-2.16991	0.364521	-5.95277	2.63641e-09	5.64273e-08	2.92829	BLOOD_vs_HCC
OST4	1243.36	-2.83982	0.477272	-5.95011	2.67961e-09	6.23748e-08	2.63024	BLOOD_vs_HCC
NFKB2	658.634	-3.60185	0.606211	-5.94159	2.82275e-09	5.70436e-08	3.06512	BLOOD_vs_HCC
MFSD14A	313.645	-5.33107	0.898286	-5.93472	2.94355e-09	2.45628e-07	0.686119	BLOOD_vs_HCC
SORL1	3288.67	2.94254	0.504239	5.83561	5.35944e-09	1.22628e-07	2.63024	BLOOD_vs_HCC
NHSL2	2767.38	4.38341	0.754669	5.80839	6.30748e-09	1.42632e-07	2.64633	BLOOD_vs_HCC
PIP4K2A	2267.99	3.29345	0.569567	5.78238	7.36503e-09	1.50417e-07	2.91363	BLOOD_vs_HCC
CCDC85B	502.204	-4.44081	0.770669	-5.76227	8.29886e-09	1.60344e-07	3.0626	BLOOD_vs_HCC
CD7	1469.99	-4.08632	0.709538	-5.75913	8.45508e-09	1.89159e-07	2.63024	BLOOD_vs_HCC
RPL22L1	625.678	-4.25752	0.743133	-5.72916	1.00932e-08	1.92699e-07	3.06512	BLOOD_vs_HCC
DNAJB6	1497.09	-2.6227	0.458104	-5.72512	1.03362e-08	2.06459e-07	2.91363	BLOOD_vs_HCC
FLT3LG	170.641	-7.41599	1.29601	-5.72218	1.05167e-08	3.37356e-06	0.149408	BLOOD_vs_HCC
S1PR1	2171.26	4.02709	0.70577	5.70595	1.15698e-08	2.28686e-07	2.92829	BLOOD_vs_HCC
FAM177A1	1151.38	-4.77998	0.838515	-5.70053	1.19434e-08	2.5701e-07	2.64633	BLOOD_vs_HCC
MTRNR2L1	6398.47	8.42167	1.47881	5.69491	1.23436e-08	2.43875e-07	2.91363	BLOOD_vs_HCC
DDX5	21630	1.90232	0.335067	5.67742	1.36739e-08	2.64493e-07	2.92829	BLOOD_vs_HCC
NR3C1	2082.16	-3.09315	0.547665	-5.64789	1.62433e-08	3.10867e-07	2.92829	BLOOD_vs_HCC
KRT86	99.4125	-12.676	2.2447	-5.64706	1.63215e-08	1.41881e-05	0.0503501	BLOOD_vs_HCC
IER2	1245.35	-3.04674	0.539791	-5.64429	1.6586e-08	3.15756e-07	2.92829	BLOOD_vs_HCC
MT-ATP8	2131.49	3.20096	0.567534	5.64013	1.69924e-08	3.21799e-07	2.92829	BLOOD_vs_HCC
TOMM7	1287.23	-2.875	0.513362	-5.60034	2.13937e-08	4.05069e-07	2.91363	BLOOD_vs_HCC
ZFP36L1	2726.94	-2.99671	0.536803	-5.58252	2.37052e-08	4.41379e-07	2.9475	BLOOD_vs_HCC
CCPG1	161.95	-9.99938	1.79351	-5.57531	2.47083e-08	5.22683e-06	0.22353	BLOOD_vs_HCC
DDX39B	199.797	-6.31906	1.13543	-5.56535	2.6162e-08	5.31353e-06	0.230759	BLOOD_vs_HCC
COMMD6	1231.18	-2.81752	0.50691	-5.55822	2.72536e-08	5.58644e-07	2.63024	BLOOD_vs_HCC
CD69	3392.28	-2.27379	0.410295	-5.54185	2.9929e-08	5.58025e-07	2.92829	BLOOD_vs_HCC
GYPC	968.427	-3.03041	0.547025	-5.5398	3.02816e-08	5.58644e-07	2.92829	BLOOD_vs_HCC
SLAMF1	2322.49	-2.32868	0.420417	-5.53897	3.04255e-08	5.58644e-07	2.92829	BLOOD_vs_HCC
TGFB1	519.023	-3.8342	0.6937	-5.52718	3.25426e-08	5.67959e-07	3.06512	BLOOD_vs_HCC
MCL1	2386.88	-2.71955	0.494019	-5.50494	3.69289e-08	6.74617e-07	2.91363	BLOOD_vs_HCC
LY6E	2215.94	-2.44675	0.445914	-5.48704	4.08717e-08	7.39215e-07	2.91363	BLOOD_vs_HCC
ROMO1	468.468	-4.23442	0.772043	-5.48469	4.14184e-08	6.84018e-07	3.20681	BLOOD_vs_HCC
DDIT4	2974.33	-2.62497	0.478968	-5.48048	4.24179e-08	7.63381e-07	2.91363	BLOOD_vs_HCC
NPM1	1722.22	-2.33934	0.42762	-5.47062	4.48469e-08	8.85289e-07	2.63024	BLOOD_vs_HCC
BRD8	1815.7	3.39091	0.619899	5.4701	4.49776e-08	8.85289e-07	2.64633	BLOOD_vs_HCC
TAP2	136.996	-10.1466	1.86548	-5.4391	5.35503e-08	1.54323e-05	0.149408	BLOOD_vs_HCC
JUND	526.183	-4.54445	0.835624	-5.43839	5.3763e-08	9.5121e-07	2.92032	BLOOD_vs_HCC
DGKA	1941.09	3.49043	0.642813	5.42994	5.63727e-08	9.94823e-07	2.91363	BLOOD_vs_HCC
CLEC2B	736.522	-3.17557	0.586067	-5.41844	6.01203e-08	1.05583e-06	2.91363	BLOOD_vs_HCC
JUNB	3929.44	-3.4754	0.642175	-5.41192	6.23541e-08	1.20366e-06	2.63024	BLOOD_vs_HCC
CHCHD2	1178.58	-2.74425	0.508832	-5.39324	6.92002e-08	1.20366e-06	2.91363	BLOOD_vs_HCC
ELOB	690.767	-3.35546	0.622465	-5.3906	7.02244e-08	1.3338e-06	2.64633	BLOOD_vs_HCC
GPR183	4035.14	2.59287	0.481075	5.38974	7.05612e-08	1.3338e-06	2.64633	BLOOD_vs_HCC
RPL13A	8908.81	-1.67812	0.311746	-5.38297	7.32678e-08	1.37036e-06	2.64633	BLOOD_vs_HCC
NR4A1	363.137	-5.60008	1.04259	-5.37133	7.81574e-08	1.3338e-06	2.92032	BLOOD_vs_HCC
UQCRB	971.72	-3.25747	0.606555	-5.37044	7.85431e-08	1.3338e-06	2.92829	BLOOD_vs_HCC
FBXO11	99.5137	-11.0446	2.05668	-5.37012	7.86835e-08	2.17047e-05	0.149408	BLOOD_vs_HCC
SPSB3	140.09	-6.88729	1.28859	-5.34483	9.04996e-08	2.45816e-05	0.149408	BLOOD_vs_HCC
NFKB1	2046.37	-2.1771	0.409343	-5.31852	1.04614e-07	1.95946e-06	2.63024	BLOOD_vs_HCC
RGS1	1266.91	-3.53828	0.669569	-5.28442	1.26107e-07	2.34472e-06	2.63024	BLOOD_vs_HCC
TNF	86.986	-12.4833	2.36372	-5.28122	1.28325e-07	6.30099e-05	0.0767671	BLOOD_vs_HCC
HOXA5	86.986	-12.4833	2.36372	-5.28122	1.28325e-07	2.34777e-05	0.22353	BLOOD_vs_HCC
MT-ND6	5505.31	2.97631	0.565269	5.2653	1.39961e-07	2.34472e-06	2.91363	BLOOD_vs_HCC
FOSB	899.314	-5.09555	0.968402	-5.26181	1.42644e-07	2.36679e-06	2.92829	BLOOD_vs_HCC
MYADM	948.189	-3.29971	0.627268	-5.26044	1.43712e-07	2.6146e-06	2.64633	BLOOD_vs_HCC
C9orf16	369.028	-4.18792	0.797834	-5.24911	1.52836e-07	2.53121e-06	2.92032	BLOOD_vs_HCC
SERP1	2734.29	-2.04784	0.394237	-5.19443	2.05351e-07	3.72499e-06	2.63024	BLOOD_vs_HCC
COX20	162.826	-5.96565	1.15105	-5.1828	2.18576e-07	3.47729e-05	0.250299	BLOOD_vs_HCC
PNKP	127.019	-7.12954	1.37724	-5.17668	2.25871e-07	0.000154775	0.0503501	BLOOD_vs_HCC
CXCR6	316.475	-6.26126	1.21492	-5.15364	2.55472e-07	1.54481e-05	0.709168	BLOOD_vs_HCC
ISG15	616.344	-3.64757	0.710108	-5.13665	2.79681e-07	4.33756e-06	3.0626	BLOOD_vs_HCC
H3F3B	8598.73	-1.58117	0.309759	-5.10452	3.31634e-07	5.31353e-06	2.92829	BLOOD_vs_HCC
HNRNPH1	3319.03	2.08136	0.407858	5.10314	3.34059e-07	5.33416e-06	2.91363	BLOOD_vs_HCC
BATF	566.104	-3.80212	0.746477	-5.09343	3.51652e-07	5.33416e-06	3.0626	BLOOD_vs_HCC
HSPA8	14626.8	-1.40062	0.275303	-5.08755	3.62723e-07	6.37855e-06	2.63024	BLOOD_vs_HCC
MAN2B1	81.2394	-9.06167	1.78248	-5.08373	3.7009e-07	6.26821e-05	0.22353	BLOOD_vs_HCC
SNHG16	343.345	-4.54699	0.895674	-5.07661	3.84233e-07	2.22435e-05	0.709168	BLOOD_vs_HCC
NEAT1	3616.41	-1.82352	0.360375	-5.06006	4.19121e-07	7.23078e-06	2.64633	BLOOD_vs_HCC
TRAPPC5	134.977	-6.43947	1.27418	-5.0538	4.331e-07	0.000104435	0.149408	BLOOD_vs_HCC
IFITM1	4795.91	-2.0689	0.409925	-5.04702	4.48753e-07	7.01139e-06	2.9475	BLOOD_vs_HCC
EML4	2444.83	-2.30749	0.457283	-5.04609	4.50933e-07	7.01495e-06	2.9475	BLOOD_vs_HCC
SAT1	2358.83	-2.12662	0.422781	-5.03007	4.90291e-07	7.61135e-06	2.92829	BLOOD_vs_HCC
RPS11	4063.25	-1.62937	0.324766	-5.01708	5.24627e-07	8.1504e-06	2.91363	BLOOD_vs_HCC
SMCHD1	1900.03	-2.12075	0.423058	-5.01291	5.36138e-07	9.18737e-06	2.63024	BLOOD_vs_HCC
HMGN2	914.44	-2.66915	0.536324	-4.97675	6.46606e-07	9.96027e-06	2.91363	BLOOD_vs_HCC
FAM107B	2793.73	-1.88373	0.379078	-4.96925	6.72127e-07	1.13307e-05	2.63024	BLOOD_vs_HCC
OGT	2819.11	2.51533	0.506388	4.9672	6.79276e-07	1.02996e-05	2.9475	BLOOD_vs_HCC
RPS5	7706.71	-1.89267	0.382588	-4.94702	7.53578e-07	1.13307e-05	2.9475	BLOOD_vs_HCC
CSRNP1	554.129	-3.2685	0.660832	-4.94604	7.57381e-07	1.14459e-05	2.92032	BLOOD_vs_HCC
SRSF6	2041.51	2.90466	0.589965	4.92345	8.50328e-07	1.27624e-05	2.92829	BLOOD_vs_HCC
ESYT1	2353.01	2.36614	0.481861	4.91041	9.08868e-07	1.49089e-05	2.64633	BLOOD_vs_HCC
EPC1	900.969	-2.92638	0.597839	-4.89493	9.83393e-07	1.58405e-05	2.63024	BLOOD_vs_HCC
RABAC1	630.007	-3.09204	0.631717	-4.89467	9.84721e-07	1.46979e-05	2.92032	BLOOD_vs_HCC
SYTL3	955.384	-3.0062	0.614984	-4.88825	1.01735e-06	1.4922e-05	2.9475	BLOOD_vs_HCC
MYO1F	1665.88	3.10464	0.636444	4.87811	1.07108e-06	1.7012e-05	2.64633	BLOOD_vs_HCC
GADD45B	1040.03	-4.00541	0.821161	-4.87774	1.07307e-06	1.56666e-05	2.91363	BLOOD_vs_HCC
RHBDD2	943.177	-2.98297	0.612926	-4.86678	1.13432e-06	1.63465e-05	2.92829	BLOOD_vs_HCC
COX8A	579.298	-3.349	0.688616	-4.86338	1.15397e-06	1.55805e-05	3.16329	BLOOD_vs_HCC
RPL15	8023.42	-1.53305	0.315649	-4.85682	1.19286e-06	1.70542e-05	2.92829	BLOOD_vs_HCC
MT-ND4L	14556.5	1.30787	0.269382	4.85508	1.20335e-06	1.90036e-05	2.63024	BLOOD_vs_HCC
INSIG1	1411.66	-3.05878	0.631306	-4.84516	1.26512e-06	1.81068e-05	2.91363	BLOOD_vs_HCC
SEC61B	1186.2	-2.40893	0.497946	-4.83773	1.31328e-06	2.05329e-05	2.64633	BLOOD_vs_HCC
DDX17	3671.13	1.81894	0.380058	4.78596	1.70173e-06	2.6156e-05	2.63024	BLOOD_vs_HCC
GIMAP6	1293.71	3.76013	0.786366	4.78166	1.73851e-06	2.66198e-05	2.63024	BLOOD_vs_HCC
NR4A3	275.841	-8.33089	1.7429	-4.77991	1.75371e-06	9.03209e-05	0.709168	BLOOD_vs_HCC
ZFAS1	633.847	-3.20486	0.671465	-4.77294	1.81557e-06	2.41506e-05	3.0626	BLOOD_vs_HCC
FAM133B	271.581	-4.31746	0.905716	-4.7669	1.87078e-06	0.000192227	0.332526	BLOOD_vs_HCC
MGAT2	164.03	-5.7644	1.21429	-4.74712	2.0633e-06	0.000293755	0.231046	BLOOD_vs_HCC
SETX	2721.6	2.18042	0.462556	4.71385	2.43081e-06	3.3305e-05	2.92829	BLOOD_vs_HCC
SOCS3	480.257	-3.72845	0.791911	-4.70817	2.49946e-06	3.42095e-05	2.92032	BLOOD_vs_HCC
IFITM2	2799.31	-2.20652	0.470041	-4.69433	2.67487e-06	3.60012e-05	2.9475	BLOOD_vs_HCC
HPGD	2010.43	-1.85696	0.396055	-4.68863	2.75034e-06	3.68788e-05	2.9475	BLOOD_vs_HCC
PCBP1	2118.49	-2.43047	0.520888	-4.666	3.07115e-06	4.58058e-05	2.63024	BLOOD_vs_HCC
RPL31	4440.69	-1.64696	0.353142	-4.66373	3.10522e-06	4.58624e-05	2.64633	BLOOD_vs_HCC
KLC1	87.172	-10.2437	2.19797	-4.66052	3.15406e-06	0.000448816	0.22353	BLOOD_vs_HCC
TMEM258	935.641	-2.74507	0.589045	-4.6602	3.15895e-06	4.26908e-05	2.91363	BLOOD_vs_HCC
KLF4	68.3461	-12.1354	2.60448	-4.65942	3.171e-06	0.00059516	0.164052	BLOOD_vs_HCC
PAK3	68.3461	-12.1354	2.60448	-4.65942	3.171e-06	0.00059516	0.164052	BLOOD_vs_HCC
KLRB1	11420.8	-1.24726	0.267817	-4.65712	3.20662e-06	4.71065e-05	2.64633	BLOOD_vs_HCC
EZR	3083.07	-2.01664	0.434917	-4.63685	3.53753e-06	4.71065e-05	2.91363	BLOOD_vs_HCC
ANKRD12	3146.17	-1.70799	0.368509	-4.63487	3.57158e-06	4.71491e-05	2.92829	BLOOD_vs_HCC
HOTAIRM1	129.532	-6.13272	1.32747	-4.61985	3.84022e-06	0.00143593	0.0767671	BLOOD_vs_HCC
TXN	545.485	-3.09554	0.671567	-4.60942	4.03786e-06	5.28711e-05	2.92032	BLOOD_vs_HCC
SNHG6	525.154	-3.32106	0.721505	-4.60296	4.16528e-06	5.2341e-05	3.06512	BLOOD_vs_HCC
MRPS24	116.038	-6.31996	1.37524	-4.59553	4.31643e-06	0.00159668	0.0767671	BLOOD_vs_HCC
SYAP1	651.504	-3.19519	0.695312	-4.59533	4.32068e-06	5.24182e-05	3.16329	BLOOD_vs_HCC
PIM3	452.948	-3.42737	0.746469	-4.59144	4.40204e-06	5.3021e-05	3.16329	BLOOD_vs_HCC
CDKN1A	336.182	-4.31696	0.940875	-4.58824	4.47007e-06	0.000213987	0.709168	BLOOD_vs_HCC
RIPOR2	3495.24	2.24295	0.490829	4.56971	4.88401e-06	6.26821e-05	2.9475	BLOOD_vs_HCC
H2AFJ	410.451	-3.751	0.821237	-4.5675	4.93586e-06	6.34835e-05	2.92032	BLOOD_vs_HCC
PFN1	4738.94	-1.87121	0.410387	-4.55964	5.12422e-06	6.58242e-05	2.91363	BLOOD_vs_HCC
RBM8A	797.863	-2.70665	0.594291	-4.55442	5.25315e-06	6.72427e-05	2.91363	BLOOD_vs_HCC
BIN2	2901.87	1.87126	0.412184	4.53987	5.62879e-06	7.89798e-05	2.63024	BLOOD_vs_HCC
SLC16A3	267.936	-4.17869	0.920567	-4.53926	5.64529e-06	0.000530444	0.332526	BLOOD_vs_HCC
CARD16	787.722	-2.76779	0.610031	-4.53712	5.70272e-06	7.21239e-05	2.92829	BLOOD_vs_HCC
FKBP8	529.947	-3.36257	0.742341	-4.52968	5.90727e-06	7.16263e-05	3.06512	BLOOD_vs_HCC
GMPR2	1223.98	3.40726	0.753572	4.52148	6.14093e-06	8.55695e-05	2.63024	BLOOD_vs_HCC
FXYD5	5663.1	-1.57438	0.350305	-4.49432	6.97931e-06	9.59961e-05	2.64633	BLOOD_vs_HCC
RELB	425.984	-4.21046	0.936901	-4.49403	6.98885e-06	8.01526e-05	3.20681	BLOOD_vs_HCC
TUBA1C	265.366	-4.28567	0.955791	-4.4839	7.32908e-06	0.000336818	0.709168	BLOOD_vs_HCC
NEU1	514.885	-3.06394	0.685495	-4.46967	7.83398e-06	9.73075e-05	2.92032	BLOOD_vs_HCC
ID2	2172.79	-2.34817	0.525687	-4.46686	7.93757e-06	0.000107536	2.63024	BLOOD_vs_HCC
PTPN6	1521.84	3.30313	0.739565	4.46632	7.95768e-06	0.000107536	2.63024	BLOOD_vs_HCC
RNF19A	732.097	-3.27569	0.734439	-4.46013	8.19092e-06	0.000100459	2.9475	BLOOD_vs_HCC
PAK2	1220.01	-2.14475	0.481887	-4.45073	8.55794e-06	0.000105461	2.91363	BLOOD_vs_HCC
BTF3	2534.38	-1.91313	0.430182	-4.44726	8.69714e-06	0.000106279	2.92829	BLOOD_vs_HCC
KARS	1230.26	3.18489	0.717238	4.44049	8.97547e-06	0.000107873	2.9475	BLOOD_vs_HCC
S100A4	8289.28	-1.5113	0.340577	-4.43747	9.1022e-06	0.000109031	2.9475	BLOOD_vs_HCC
UBL5	830.959	-2.43426	0.549704	-4.42832	9.49704e-06	0.000114701	2.91363	BLOOD_vs_HCC
RPL36A	3561.87	-8.33357	1.88291	-4.42589	9.60456e-06	0.000115036	2.92829	BLOOD_vs_HCC
UQCR11	768.721	-3.12371	0.710423	-4.39697	1.09774e-05	0.000130614	2.92829	BLOOD_vs_HCC
FDX1	511.286	-4.38588	0.998307	-4.39332	1.11632e-05	0.000123363	3.16329	BLOOD_vs_HCC
RBM6	1639.87	2.57294	0.588489	4.37212	1.23044e-05	0.000146178	2.91363	BLOOD_vs_HCC
KDM6B	362.226	-3.80182	0.869681	-4.37151	1.23388e-05	0.000139914	3.0626	BLOOD_vs_HCC
RPL23	2036.03	-1.79986	0.413658	-4.35107	1.35475e-05	0.000159902	2.91363	BLOOD_vs_HCC
HSP90B1	4351.25	-1.64924	0.37982	-4.34216	1.41091e-05	0.000183876	2.63024	BLOOD_vs_HCC
NDUFA3	312.396	-3.72768	0.861152	-4.32872	1.4998e-05	0.000643697	0.709168	BLOOD_vs_HCC
DDX47	62.4086	-9.19976	2.12919	-4.32078	1.55477e-05	0.00384965	0.10137	BLOOD_vs_HCC
ATXN7	144.248	-5.77898	1.3385	-4.31751	1.578e-05	0.00187646	0.230759	BLOOD_vs_HCC
DUSP6	1423.07	-4.26195	0.989626	-4.30663	1.65759e-05	0.000192788	2.92829	BLOOD_vs_HCC
GPX4	1594.62	-2.07802	0.486126	-4.27466	1.9143e-05	0.000244728	2.63024	BLOOD_vs_HCC
TAGLN2	5538.46	-1.28823	0.301657	-4.2705	1.95031e-05	0.000223915	2.9475	BLOOD_vs_HCC
UTRN	2724.15	1.94219	0.454902	4.26946	1.95947e-05	0.000249709	2.63024	BLOOD_vs_HCC
PPT1	1347.32	2.94417	0.69147	4.25784	2.06411e-05	0.000238972	2.91363	BLOOD_vs_HCC
MID1IP1	154.378	-5.21476	1.22838	-4.24524	2.18356e-05	0.00253424	0.231046	BLOOD_vs_HCC
DOK2	876.72	-2.62669	0.619773	-4.23816	2.25363e-05	0.00025715	2.92829	BLOOD_vs_HCC
ARL4A	1471.12	-2.01691	0.476106	-4.23626	2.27275e-05	0.000287811	2.63024	BLOOD_vs_HCC
ANP32B	883.583	-2.41497	0.570855	-4.23044	2.33235e-05	0.000292598	2.63024	BLOOD_vs_HCC
NPIPB5	62.234	-10.3855	2.46161	-4.219	2.45388e-05	0.00525921	0.110809	BLOOD_vs_HCC
PLK2	55.9701	-10.9154	2.59143	-4.21212	2.5298e-05	0.00586274	0.10137	BLOOD_vs_HCC
HINT1	2699.53	-1.7552	0.416969	-4.20942	2.56024e-05	0.000319198	2.63024	BLOOD_vs_HCC
ABLIM1	1351.6	2.79021	0.662964	4.20868	2.56863e-05	0.000289358	2.9475	BLOOD_vs_HCC
RPA2	1649.58	3.42293	0.813688	4.20668	2.59152e-05	0.000291024	2.9475	BLOOD_vs_HCC
ST13	674.853	-2.93251	0.698086	-4.20079	2.65986e-05	0.000328585	2.64633	BLOOD_vs_HCC
DPM3	157.998	-4.82717	1.14994	-4.19777	2.69553e-05	0.00315378	0.22353	BLOOD_vs_HCC
POLD4	317.413	-3.6057	0.860361	-4.19091	2.77837e-05	0.0011751	0.686119	BLOOD_vs_HCC
HIST1H1C	283.739	-3.8916	0.931383	-4.1783	2.93696e-05	0.00123541	0.686119	BLOOD_vs_HCC
MORF4L1	811.921	-2.63077	0.630223	-4.17435	2.98832e-05	0.000366897	2.64633	BLOOD_vs_HCC
USP15	1594.87	-1.84725	0.444325	-4.15744	3.21833e-05	0.000393929	2.63024	BLOOD_vs_HCC
BZW1	1052.87	-2.28959	0.553442	-4.137	3.51882e-05	0.000389235	2.92829	BLOOD_vs_HCC
KLF5	541.859	-3.50335	0.847419	-4.13414	3.56281e-05	0.000393929	2.92032	BLOOD_vs_HCC
IDS	1026.81	-2.6968	0.653142	-4.12896	3.6441e-05	0.000444691	2.63024	BLOOD_vs_HCC
TPI1	1854.94	-1.71537	0.415666	-4.12681	3.67833e-05	0.000447108	2.63024	BLOOD_vs_HCC
AQP3	1205.6	-2.57289	0.62353	-4.12632	3.6861e-05	0.000447108	2.63024	BLOOD_vs_HCC
SNRPD2	1534.49	-1.9027	0.461563	-4.1223	3.7511e-05	0.000449517	2.64633	BLOOD_vs_HCC
HNRNPA0	960.793	-2.33721	0.573212	-4.07739	4.55435e-05	0.000536144	2.64633	BLOOD_vs_HCC
IFRD1	1080.43	-2.29793	0.564278	-4.07233	4.65445e-05	0.000500228	2.92829	BLOOD_vs_HCC
CTSD	706.249	-2.71583	0.666948	-4.07203	4.66052e-05	0.000500228	2.92829	BLOOD_vs_HCC
DDX24	1834.3	-1.82839	0.449355	-4.06892	4.72315e-05	0.00050545	2.92829	BLOOD_vs_HCC
PTMS	101.358	-7.20328	1.77086	-4.06769	4.74821e-05	0.00722931	0.149408	BLOOD_vs_HCC
SEC61G	687.153	-2.78303	0.684189	-4.06764	4.7492e-05	0.000557442	2.64633	BLOOD_vs_HCC
WBP1	102.252	-6.67438	1.64091	-4.0675	4.75203e-05	0.00722931	0.149408	BLOOD_vs_HCC
GABARAPL1	692.118	-2.86906	0.705371	-4.06745	4.75308e-05	0.00055967	2.63024	BLOOD_vs_HCC
CDKN1B	585.668	-3.19265	0.785624	-4.06383	4.82733e-05	0.000498368	3.0626	BLOOD_vs_HCC
RHOF	307.463	-4.0748	1.00414	-4.05801	4.94922e-05	0.0037625	0.332526	BLOOD_vs_HCC
SLC24A3	51.9791	16.8095	4.14607	4.05432	5.02797e-05	0.0103827	0.10137	BLOOD_vs_HCC
TCF7	980.575	4.69854	1.1685	4.02098	5.79561e-05	0.000668739	2.63024	BLOOD_vs_HCC
EIF1AX	395.19	-3.4671	0.865021	-4.00811	6.12063e-05	0.000613571	3.0626	BLOOD_vs_HCC
ANXA1	15515.5	-1.00993	0.252063	-4.00666	6.15823e-05	0.000641934	2.92829	BLOOD_vs_HCC
FKBP4	651.37	-3.96708	0.9931	-3.99464	6.47919e-05	0.000618513	3.20681	BLOOD_vs_HCC
CCDC107	371.496	-3.61509	0.909884	-3.97314	7.09318e-05	0.000700331	3.06512	BLOOD_vs_HCC
TOMM20	560.918	-2.79459	0.703609	-3.97179	7.13337e-05	0.00070287	3.0626	BLOOD_vs_HCC
CD37	1946.11	-1.86884	0.47224	-3.95738	7.57752e-05	0.00077866	2.92829	BLOOD_vs_HCC
HLA-B	19808.1	-1.35457	0.342383	-3.9563	7.61203e-05	0.000865925	2.63024	BLOOD_vs_HCC
GIMAP4	1569.11	6.38933	1.61807	3.94874	7.85625e-05	0.000888685	2.63024	BLOOD_vs_HCC
NUDT4	413.384	-3.06988	0.778462	-3.94351	8.0296e-05	0.000825023	2.92032	BLOOD_vs_HCC
EIF4A2	3685.71	1.43753	0.365711	3.93079	8.46688e-05	0.00086704	2.91363	BLOOD_vs_HCC
NLRC5	1290.43	2.879	0.733011	3.92764	8.57847e-05	0.000959093	2.64633	BLOOD_vs_HCC
RPS6	13207.9	-1.17273	0.29944	-3.9164	8.98806e-05	0.000904737	2.9475	BLOOD_vs_HCC
CD200R1	1420.34	2.35282	0.601021	3.91471	9.05121e-05	0.00100913	2.64633	BLOOD_vs_HCC
HSPA1B	1893.4	-10.2681	2.6235	-3.91391	9.08146e-05	0.00101587	2.63024	BLOOD_vs_HCC
SERPINH1	298.063	-6.11327	1.56848	-3.89757	9.71612e-05	0.0066989	0.332526	BLOOD_vs_HCC
BST2	1009.03	-2.04303	0.525714	-3.88619	0.000101828	0.00102029	2.92829	BLOOD_vs_HCC
ERVK3-1	161.367	-5.17691	1.33239	-3.88543	0.000102149	0.00975877	0.22353	BLOOD_vs_HCC
KRT10	418.05	-2.90027	0.747862	-3.87808	0.000105285	0.00105489	2.92032	BLOOD_vs_HCC
FXYD1	134.389	-6.61518	1.71001	-3.86851	0.000109504	0.010093	0.230759	BLOOD_vs_HCC
MT-ND2	10824.3	1.08191	0.279868	3.86578	0.000110735	0.00110898	2.91363	BLOOD_vs_HCC
CCDC159	56.2345	-8.86962	2.29682	-3.8617	0.000112603	0.0185759	0.10938	BLOOD_vs_HCC
LCK	2194.18	1.95257	0.505775	3.86056	0.00011313	0.00111686	2.9475	BLOOD_vs_HCC
SLC25A33	249.001	-3.80316	0.990046	-3.8414	0.000122335	0.00425915	0.709168	BLOOD_vs_HCC
HMGN1	1013.83	-1.95539	0.512369	-3.81638	0.000135425	0.00147394	2.63024	BLOOD_vs_HCC
LSM7	388.766	-3.06014	0.802427	-3.81361	0.000136952	0.00123541	3.20681	BLOOD_vs_HCC
NLRP1	1071.61	2.59786	0.682447	3.80668	0.000140846	0.00137537	2.9475	BLOOD_vs_HCC
PPARG	286.738	-6.85337	1.80839	-3.78977	0.000150788	0.00531004	0.672881	BLOOD_vs_HCC
WDR6	1064.72	2.96802	0.783802	3.78669	0.000152668	0.00163384	2.64633	BLOOD_vs_HCC
IFNAR2	215.559	-4.64565	1.23035	-3.77586	0.000159456	0.0137881	0.22353	BLOOD_vs_HCC
UBA7	791.082	4.3842	1.16146	3.77473	0.000160178	0.00172011	2.63024	BLOOD_vs_HCC
GATA3	5197.62	-1.48663	0.394241	-3.77085	0.000162692	0.00158989	2.91363	BLOOD_vs_HCC
NDUFB8	436.142	-2.8926	0.769078	-3.76113	0.000169147	0.00152661	3.16329	BLOOD_vs_HCC
RAP1B	980.91	-1.99268	0.530086	-3.75917	0.000170481	0.00180155	2.64633	BLOOD_vs_HCC
TMA7	1053.96	-9.63296	2.56424	-3.75665	0.000172204	0.00181382	2.64633	BLOOD_vs_HCC
ARHGAP15	2855.32	1.54869	0.41262	3.75331	0.000174514	0.00183972	2.63024	BLOOD_vs_HCC
ANKHD1	259.818	-4.91014	1.30928	-3.75025	0.00017666	0.00599384	0.686119	BLOOD_vs_HCC
SRRM2	4051.67	1.35879	0.36243	3.74911	0.000177461	0.00184972	2.64633	BLOOD_vs_HCC
GLG1	1662.82	2.12507	0.566823	3.74909	0.000177477	0.00185637	2.63024	BLOOD_vs_HCC
HIGD2A	743.756	-2.82178	0.753367	-3.74556	0.000179989	0.00172022	2.9475	BLOOD_vs_HCC
GIMAP2	1011.71	3.39513	0.906819	3.744	0.000181112	0.00173768	2.92829	BLOOD_vs_HCC
HIST1H2BK	77.3648	-6.30092	1.68395	-3.74175	0.000182745	0.0497328	0.0503501	BLOOD_vs_HCC
AKAP5	56.432	-8.22682	2.19909	-3.74102	0.000183277	0.0276017	0.10938	BLOOD_vs_HCC
GNG2	990.578	-1.9595	0.52501	-3.7323	0.000189736	0.00196925	2.63024	BLOOD_vs_HCC
LCP1	7382.33	1.50347	0.402864	3.73195	0.000190003	0.00180155	2.9475	BLOOD_vs_HCC
BTN3A2	1509.45	2.1477	0.576212	3.72728	0.000193556	0.0018256	2.9475	BLOOD_vs_HCC
ARPC3	1462.67	-1.71455	0.460206	-3.72563	0.000194831	0.00184928	2.91363	BLOOD_vs_HCC
SMDT1	814.292	-2.32702	0.624956	-3.7235	0.000196483	0.00201648	2.64633	BLOOD_vs_HCC
CCR6	389.144	-3.87026	1.04244	-3.7127	0.000205056	0.0019218	2.92032	BLOOD_vs_HCC
PLEC	1464.97	2.51403	0.678793	3.70367	0.000212502	0.00197595	2.92829	BLOOD_vs_HCC
PIEZO1	811.066	3.82431	1.03748	3.68616	0.000227659	0.00211666	2.91363	BLOOD_vs_HCC
CISH	825.172	3.42398	0.929878	3.68218	0.000231251	0.00236358	2.63024	BLOOD_vs_HCC
H2AFV	982.377	-2.99858	0.819204	-3.66036	0.000251864	0.00254568	2.64633	BLOOD_vs_HCC
LEPROTL1	1673.19	-1.65734	0.452919	-3.65924	0.00025296	0.00255032	2.64633	BLOOD_vs_HCC
CRBN	1310.41	2.22874	0.609102	3.65905	0.000253152	0.00234171	2.91363	BLOOD_vs_HCC
BCL3	205.612	-4.40738	1.20527	-3.65675	0.000255438	0.0280756	0.149408	BLOOD_vs_HCC
UBE2V1	199.12	-4.37379	1.1996	-3.64605	0.000266307	0.0210486	0.22353	BLOOD_vs_HCC
STAM	581.752	-2.35338	0.646548	-3.63991	0.000272731	0.00232963	3.16329	BLOOD_vs_HCC
DYRK2	712.407	4.2308	1.16443	3.63335	0.00027976	0.00255533	2.91363	BLOOD_vs_HCC
DDX1	1110.46	2.82995	0.779721	3.62944	0.000284032	0.00258784	2.91363	BLOOD_vs_HCC
CLIC1	3400.94	-1.26031	0.347883	-3.62281	0.000291424	0.00264195	2.91363	BLOOD_vs_HCC
EIF5A	918.43	-2.22239	0.615205	-3.61243	0.000303336	0.0027431	2.91363	BLOOD_vs_HCC
RNF145	367.233	-4.45004	1.23406	-3.60601	0.000310946	0.00260294	3.16329	BLOOD_vs_HCC
SMIM4	188.266	-4.61896	1.28131	-3.60488	0.000312291	0.0329453	0.149408	BLOOD_vs_HCC
OAZ1	3017.25	-1.26499	0.35155	-3.59831	0.000320288	0.00315754	2.64633	BLOOD_vs_HCC
SNRPG	301.873	-3.10196	0.863359	-3.5929	0.000327021	0.0102749	0.672881	BLOOD_vs_HCC
CCND2	2253.59	1.68795	0.47009	3.5907	0.000329791	0.00294076	2.9475	BLOOD_vs_HCC
MSN	3841.73	1.40794	0.392317	3.58878	0.000332224	0.00327107	2.63024	BLOOD_vs_HCC
CHTOP	906.247	2.7248	0.761686	3.57733	0.000347121	0.00338868	2.64633	BLOOD_vs_HCC
GTF3A	2597.96	1.73713	0.486032	3.57411	0.000351425	0.00312591	2.9475	BLOOD_vs_HCC
MAP3K8	744.826	-3.04921	0.853942	-3.57075	0.000355965	0.00347931	2.63024	BLOOD_vs_HCC
LPCAT2	86.3165	-5.44836	1.5265	-3.56918	0.000358096	0.0364749	0.149408	BLOOD_vs_HCC
EIF1	10002.2	-1.26881	0.355784	-3.56625	0.000362127	0.0032266	2.91363	BLOOD_vs_HCC
UXT	828.459	-2.7881	0.782721	-3.56206	0.00036795	0.00356592	2.64633	BLOOD_vs_HCC
LINC01138	43.7688	-8.71285	2.44835	-3.55867	0.000372742	0.0507947	0.100163	BLOOD_vs_HCC
PDCL3	218.915	-3.53627	0.993741	-3.55855	0.000372913	0.0112887	0.672881	BLOOD_vs_HCC
INPP1	336.167	-4.31377	1.21296	-3.5564	0.000375965	0.0112046	0.686119	BLOOD_vs_HCC
DRAP1	450.038	-2.55978	0.720445	-3.55306	0.000380778	0.0032266	3.06512	BLOOD_vs_HCC
COX6B1	855.027	-1.97317	0.555835	-3.54992	0.000385348	0.00371244	2.63024	BLOOD_vs_HCC
NDRG3	777.617	3.33528	0.940279	3.54712	0.000389474	0.00340535	2.9475	BLOOD_vs_HCC
BAX	305.556	-3.51924	0.992264	-3.54668	0.000390124	0.0114934	0.686119	BLOOD_vs_HCC
A2M	728.431	4.26285	1.20625	3.53396	0.000409382	0.0035775	2.91363	BLOOD_vs_HCC
STAT5B	691.279	3.58847	1.01549	3.53374	0.00040972	0.0035711	2.92829	BLOOD_vs_HCC
NOL4L	871.851	2.66636	0.754882	3.53216	0.000412179	0.0035711	2.9475	BLOOD_vs_HCC
RIMKLA	43.862	15.2563	4.31988	3.53165	0.000412972	0.0547599	0.10137	BLOOD_vs_HCC
GRAP2	833.795	2.83195	0.80281	3.52754	0.000419434	0.00365655	2.91363	BLOOD_vs_HCC
MAT2B	2086.62	2.39573	0.680305	3.52156	0.000429021	0.00404992	2.64633	BLOOD_vs_HCC
SF3B1	3995.98	1.27223	0.36175	3.51686	0.000436685	0.00377975	2.91363	BLOOD_vs_HCC
TSC22D3	10392.4	-0.963845	0.274087	-3.51656	0.00043717	0.0041326	2.63024	BLOOD_vs_HCC
SLC9A3R1	1894.5	1.89962	0.541021	3.51118	0.000446114	0.0038329	2.92829	BLOOD_vs_HCC
ZBTB16	949.585	-2.14209	0.611053	-3.50558	0.000455616	0.00426691	2.63024	BLOOD_vs_HCC
HNRNPA2B1	4514.6	-1.21495	0.346654	-3.5048	0.000456956	0.00426953	2.63024	BLOOD_vs_HCC
UBE2S	128.266	-6.51166	1.86417	-3.49307	0.00047751	0.0744461	0.0767671	BLOOD_vs_HCC
TMEM63A	943.306	2.78626	0.798568	3.48907	0.000484696	0.00409831	2.9475	BLOOD_vs_HCC
STARD4	631.713	-2.5366	0.727315	-3.48763	0.00048733	0.00385764	3.16329	BLOOD_vs_HCC
HMGCS1	346.305	-3.82123	1.096	-3.48654	0.000489313	0.0137881	0.686119	BLOOD_vs_HCC
NDUFS5	664.108	-2.45059	0.703108	-3.48537	0.000491465	0.00418416	2.91363	BLOOD_vs_HCC
RPL9	4033.15	-5.66959	1.62897	-3.48047	0.000500532	0.0042514	2.91363	BLOOD_vs_HCC
STX11	218.246	-3.55816	1.0224	-3.4802	0.000501031	0.0137552	0.709168	BLOOD_vs_HCC
KLF12	1149.85	2.26517	0.652299	3.47259	0.000515454	0.0043376	2.91363	BLOOD_vs_HCC
MCM3	722.282	3.65361	1.05569	3.46087	0.000538424	0.00447712	2.92829	BLOOD_vs_HCC
COX6C	1017.12	-2.16317	0.626126	-3.45485	0.000550591	0.00457219	2.91363	BLOOD_vs_HCC
SPCS2	394.861	-2.65001	0.767208	-3.4541	0.000552143	0.00457219	2.92032	BLOOD_vs_HCC
TRAF3IP3	1691.14	1.78552	0.51716	3.45255	0.000555305	0.00457219	2.9475	BLOOD_vs_HCC
RPP21	117.595	-4.7179	1.36719	-3.4508	0.000558924	0.110924	0.0503501	BLOOD_vs_HCC
SH2D2A	436.519	-2.50841	0.727044	-3.45016	0.000560264	0.00447132	3.06512	BLOOD_vs_HCC
RORA	2857.03	-1.29612	0.375732	-3.44959	0.000561438	0.0051152	2.63024	BLOOD_vs_HCC
CSNK2B	357.046	-2.78172	0.807016	-3.44692	0.000567024	0.00467408	2.92032	BLOOD_vs_HCC
B4GALT1	468.5	-2.9186	0.84729	-3.44463	0.000571843	0.00470311	2.92032	BLOOD_vs_HCC
TNFRSF18	751.97	-2.2891	0.665251	-3.44096	0.000579663	0.00522549	2.64633	BLOOD_vs_HCC
SNHG15	547.268	-2.53182	0.735954	-3.44019	0.000581315	0.00447712	3.16329	BLOOD_vs_HCC
TCEA1	372.316	-2.93267	0.855793	-3.42685	0.000610637	0.00459433	3.20681	BLOOD_vs_HCC
CDC42	1182.55	-1.67135	0.489264	-3.41606	0.000635349	0.00518767	2.92829	BLOOD_vs_HCC
PABPC1	7242.65	-1.07048	0.313899	-3.41029	0.000648945	0.0052405	2.9475	BLOOD_vs_HCC
ILK	137.989	-4.78051	1.40222	-3.40925	0.000651411	0.0412504	0.230759	BLOOD_vs_HCC
TRIM21	789.877	3.78498	1.11202	3.40371	0.000664781	0.00587374	2.64633	BLOOD_vs_HCC
ARHGDIA	581.559	-2.35539	0.694124	-3.39333	0.000690473	0.00532597	3.06512	BLOOD_vs_HCC
DENND4B	679.493	3.1341	0.924468	3.39016	0.000698514	0.0056272	2.92829	BLOOD_vs_HCC
HSPA2	69.5358	-7.57457	2.23466	-3.38959	0.000699961	0.0561986	0.164052	BLOOD_vs_HCC
SLC44A2	1012.73	2.35079	0.694061	3.38701	0.0007066	0.00618859	2.64633	BLOOD_vs_HCC
TOMM5	197.925	-3.73669	1.1065	-3.37705	0.000732672	0.0423563	0.250299	BLOOD_vs_HCC
HCP5	84.2717	-6.13407	1.81738	-3.37522	0.000737555	0.134919	0.0503501	BLOOD_vs_HCC
RPL5	11067.6	-1.09902	0.325657	-3.37479	0.000738727	0.00587313	2.9475	BLOOD_vs_HCC
P2RX4	762.162	3.30531	0.980573	3.37079	0.000749522	0.00593271	2.9475	BLOOD_vs_HCC
NPRL2	765.524	3.31169	0.982848	3.36949	0.000753085	0.00657849	2.63024	BLOOD_vs_HCC
PDE4A	222.629	-5.1163	1.5213	-3.36311	0.000770707	0.0195435	0.709168	BLOOD_vs_HCC
SNHG8	684.407	-2.22073	0.660843	-3.36045	0.000778151	0.00672692	2.64633	BLOOD_vs_HCC
PRR13	731.859	-2.3966	0.713221	-3.36025	0.000778707	0.00617693	2.92829	BLOOD_vs_HCC
MAGOH	215.731	-4.24953	1.26638	-3.35566	0.000791763	0.0488289	0.22353	BLOOD_vs_HCC
BIRC6	1487.51	1.79382	0.535021	3.3528	0.000799972	0.0063497	2.91363	BLOOD_vs_HCC
BACH2	516.579	-2.71193	0.808901	-3.35261	0.000800521	0.00586274	3.20681	BLOOD_vs_HCC
BTN3A1	729.385	2.90566	0.868085	3.3472	0.000816315	0.00643293	2.92829	BLOOD_vs_HCC
NRP2	37.3377	16.3682	4.89072	3.34679	0.000817538	0.0623927	0.164052	BLOOD_vs_HCC
NDUFB11	546.891	-2.46465	0.737496	-3.34192	0.000832018	0.00656027	2.92032	BLOOD_vs_HCC
DNAJB2	95.7529	-4.899	1.46696	-3.33956	0.000839119	0.11016	0.0767671	BLOOD_vs_HCC
ANAPC5	1995.47	1.64124	0.492917	3.32965	0.000869549	0.00745039	2.63024	BLOOD_vs_HCC
PSMA2	308.919	-3.27831	0.985007	-3.3282	0.000874079	0.0216143	0.709168	BLOOD_vs_HCC
STK38	1091.23	2.80348	0.842642	3.32702	0.00087781	0.00745957	2.64633	BLOOD_vs_HCC
NLRC3	696.907	3.17257	0.954913	3.32237	0.000892574	0.00759916	2.63024	BLOOD_vs_HCC
ATP1B1	484.744	-2.83967	0.856192	-3.31663	0.000911109	0.0067911	3.0626	BLOOD_vs_HCC
ADAR	1989.26	1.63681	0.493691	3.31545	0.000914945	0.00775683	2.63024	BLOOD_vs_HCC
BAZ1A	804.738	-1.95353	0.590165	-3.31014	0.000932494	0.00787246	2.63024	BLOOD_vs_HCC
KRAS	361.054	-2.72757	0.824255	-3.30913	0.000935858	0.00726842	2.92032	BLOOD_vs_HCC
EFHD2	347.177	-3.18537	0.963038	-3.30763	0.000940904	0.0241222	0.672881	BLOOD_vs_HCC
RAP2B	907.957	2.52452	0.763681	3.30573	0.00094729	0.00735836	2.91363	BLOOD_vs_HCC
ADNP	810.435	2.7891	0.844591	3.30231	0.00095892	0.00802823	2.63024	BLOOD_vs_HCC
IFI27L2	162.284	-4.00853	1.21655	-3.29501	0.00098419	0.0577101	0.22353	BLOOD_vs_HCC
BIRC3	2393.79	-1.51586	0.4602	-3.29391	0.000988045	0.00757178	2.92829	BLOOD_vs_HCC
POLR2J3	58.1505	-6.24231	1.89619	-3.29202	0.000994692	0.095969	0.10938	BLOOD_vs_HCC
VPS37B	295.284	-3.58598	1.08941	-3.29168	0.000995894	0.0243832	0.700022	BLOOD_vs_HCC
TNFRSF19	475.777	7.11663	2.16273	3.29057	0.000999838	0.00737301	3.0626	BLOOD_vs_HCC
NEDD8	779.512	-1.92161	0.584932	-3.28518	0.00101919	0.00772681	2.9475	BLOOD_vs_HCC
TUBB2A	162.096	-6.09946	1.85684	-3.28487	0.0010203	0.0577101	0.231046	BLOOD_vs_HCC
EFCAB14	966.462	2.27851	0.694145	3.28247	0.00102904	0.007859	2.91363	BLOOD_vs_HCC
C18orf32	199.936	-3.96233	1.20788	-3.2804	0.0010366	0.0594407	0.22353	BLOOD_vs_HCC
CNOT8	810.447	3.39654	1.03625	3.27771	0.00104651	0.00794243	2.91363	BLOOD_vs_HCC
NINJ1	798.584	-2.25966	0.689615	-3.2767	0.00105029	0.00794243	2.92829	BLOOD_vs_HCC
GCSH	56.2737	-8.73636	2.66634	-3.27653	0.00105089	0.10707	0.100163	BLOOD_vs_HCC
MT-ND1	9128.74	1.25547	0.383555	3.27324	0.00106321	0.00795983	2.9475	BLOOD_vs_HCC
ADGRE5	2236.19	-1.53719	0.470139	-3.26966	0.00107677	0.00807175	2.92829	BLOOD_vs_HCC
LGALS1	993.891	-2.24702	0.687294	-3.26938	0.00107783	0.00807175	2.92829	BLOOD_vs_HCC
MRPL41	211.574	-3.789	1.15974	-3.26711	0.00108652	0.0612917	0.22353	BLOOD_vs_HCC
MANF	298.775	-2.85679	0.875693	-3.26231	0.00110506	0.0271375	0.672881	BLOOD_vs_HCC
TLE4	1233.96	-1.63502	0.501313	-3.26149	0.0011083	0.00903458	2.64633	BLOOD_vs_HCC
IFNGR1	1184.42	-1.7869	0.549154	-3.25392	0.00113823	0.00853165	2.91363	BLOOD_vs_HCC
ALOX5AP	1216.31	-1.943	0.597531	-3.25172	0.0011471	0.0085804	2.91363	BLOOD_vs_HCC
NDFIP2	377.601	-3.64573	1.12526	-3.23991	0.00119566	0.00853165	3.06512	BLOOD_vs_HCC
CELF1	1027.27	2.09044	0.646321	3.23437	0.00121914	0.00903458	2.91363	BLOOD_vs_HCC
APEH	638.044	3.03954	0.942326	3.22557	0.00125722	0.00892836	3.0626	BLOOD_vs_HCC
FUS	1255	-1.7003	0.527315	-3.22444	0.00126218	0.00930719	2.91363	BLOOD_vs_HCC
ZC3H12A	517.728	-3.51122	1.08927	-3.22346	0.00126652	0.00897596	3.0626	BLOOD_vs_HCC
PSMC1	146.391	-4.07296	1.26412	-3.22198	0.00127309	0.0679301	0.230759	BLOOD_vs_HCC
UQCRH	847.8	-1.91632	0.595183	-3.21971	0.00128319	0.00944296	2.91363	BLOOD_vs_HCC
CYFIP2	2771.87	1.60705	0.499635	3.21644	0.0012979	0.0103278	2.64633	BLOOD_vs_HCC
ACTL6A	696.498	2.83562	0.881899	3.21536	0.00130282	0.0103464	2.64633	BLOOD_vs_HCC
NCOA4	1164.38	2.56334	0.797433	3.21449	0.00130678	0.0103573	2.64633	BLOOD_vs_HCC
RASGRP2	654.406	3.07732	0.957583	3.21363	0.00131069	0.00921346	3.0626	BLOOD_vs_HCC
SSR4	2005.83	-1.73935	0.541271	-3.21346	0.00131148	0.0103963	2.63024	BLOOD_vs_HCC
COX4I1	2887.12	-1.25665	0.391161	-3.21263	0.00131527	0.00965948	2.91363	BLOOD_vs_HCC
RPS27L	536.391	-2.18488	0.680198	-3.21212	0.00131758	0.00902211	3.16329	BLOOD_vs_HCC
MED4	56.9673	-7.25232	2.26475	-3.20227	0.00136351	0.126866	0.10137	BLOOD_vs_HCC
JUN	2068.65	-5.99826	1.87491	-3.19922	0.00137798	0.0108382	2.63024	BLOOD_vs_HCC
SELPLG	2265.97	1.47677	0.462282	3.19453	0.00140058	0.0102035	2.91363	BLOOD_vs_HCC
FERMT3	769.639	2.47623	0.775612	3.19261	0.00140994	0.0110249	2.63024	BLOOD_vs_HCC
PARP14	1095.51	1.95036	0.611317	3.19043	0.00142062	0.0102102	2.9475	BLOOD_vs_HCC
MAP1LC3B	1391.32	-1.45716	0.457445	-3.18544	0.00144535	0.0111897	2.64633	BLOOD_vs_HCC
ABCG1	194.582	-3.86825	1.21513	-3.1834	0.00145558	0.0769787	0.22353	BLOOD_vs_HCC
TAGAP	2223.86	1.53197	0.481357	3.18262	0.00145951	0.0103963	2.92829	BLOOD_vs_HCC
NUP88	833.822	3.43886	1.08092	3.18142	0.00146555	0.0112887	2.64633	BLOOD_vs_HCC
TBCD	645.353	3.0573	0.961603	3.17938	0.00147592	0.00980866	3.20681	BLOOD_vs_HCC
UBE2D2	1099.58	-1.63488	0.514339	-3.17861	0.00147981	0.0114381	2.63024	BLOOD_vs_HCC
NFAT5	717.646	-2.2603	0.712213	-3.17363	0.00150546	0.0107311	2.91363	BLOOD_vs_HCC
HYMAI	94.4135	-7.78087	2.45323	-3.17168	0.00151558	0.0705711	0.260864	BLOOD_vs_HCC
VPS13D	860.923	2.26242	0.713964	3.16881	0.00153065	0.0116694	2.64633	BLOOD_vs_HCC
HNRNPU	2452.79	-1.36005	0.429261	-3.16834	0.00153312	0.0108382	2.92829	BLOOD_vs_HCC
ZNF160	538.957	3.81977	1.20616	3.1669	0.00154075	0.010277	3.16329	BLOOD_vs_HCC
KIAA2026	614.123	2.98246	0.941775	3.16685	0.001541	0.0108951	2.92032	BLOOD_vs_HCC
PGAM1	212.429	-3.24996	1.02638	-3.16643	0.00154322	0.0783113	0.230759	BLOOD_vs_HCC
NAA38	203.572	-3.27105	1.03339	-3.16536	0.0015489	0.0798688	0.22353	BLOOD_vs_HCC
TTC37	861.737	2.44533	0.773324	3.1621	0.00156633	0.0118962	2.64633	BLOOD_vs_HCC
ARHGAP25	749.317	2.94632	0.932061	3.16108	0.00157184	0.011074	2.91363	BLOOD_vs_HCC
CSF2	69.4706	-7.43532	2.3571	-3.15443	0.0016081	0.135294	0.10938	BLOOD_vs_HCC
LRRFIP2	617.099	-2.3794	0.755794	-3.14822	0.00164269	0.0106596	3.20681	BLOOD_vs_HCC
ANKRD10	913.537	2.35402	0.748148	3.14647	0.00165255	0.0114511	2.92829	BLOOD_vs_HCC
IFI6	287.263	-2.90566	0.924312	-3.14359	0.00166887	0.0363855	0.700022	BLOOD_vs_HCC
PDE4D	688.597	-2.65334	0.845462	-3.13833	0.00169913	0.0117432	2.91363	BLOOD_vs_HCC
GNB2	403.021	-2.66052	0.848669	-3.13494	0.00171891	0.0110249	3.20681	BLOOD_vs_HCC
CCT7	1665.71	1.97111	0.629232	3.13256	0.00173286	0.0130679	2.63024	BLOOD_vs_HCC
ALAS1	765.827	-1.83648	0.587241	-3.1273	0.00176422	0.0119845	2.9475	BLOOD_vs_HCC
FLOT2	896.529	2.32461	0.74392	3.12481	0.0017792	0.0132941	2.64633	BLOOD_vs_HCC
ANKZF1	678.921	2.79685	0.895097	3.12463	0.00178028	0.0132941	2.64633	BLOOD_vs_HCC
RNF20	559.007	3.27273	1.04834	3.12183	0.00179734	0.0114934	3.16329	BLOOD_vs_HCC
RALGAPA1	560.639	-3.28624	1.05407	-3.11767	0.00182284	0.0124275	2.92032	BLOOD_vs_HCC
DNAJC13	454.218	7.04856	2.26189	3.11622	0.00183184	0.0124654	2.92032	BLOOD_vs_HCC
ZNF428	143.839	-3.78164	1.21373	-3.11573	0.00183491	0.119671	0.149408	BLOOD_vs_HCC
CHMP4A	114.208	-4.33971	1.39314	-3.11506	0.00183908	0.119672	0.149408	BLOOD_vs_HCC
SNRPF	265.549	-2.98872	0.96168	-3.10781	0.00188482	0.0400548	0.700022	BLOOD_vs_HCC
TYMP	419.717	-2.48659	0.80146	-3.10258	0.00191841	0.0119845	3.20681	BLOOD_vs_HCC
IGFBP4	126.374	-7.43445	2.39909	-3.09886	0.00194267	0.0928897	0.22353	BLOOD_vs_HCC
SNRPD3	385.424	6.81193	2.19891	3.09786	0.00194922	0.0121476	3.20681	BLOOD_vs_HCC
GNG5	448.41	-2.22815	0.720749	-3.09143	0.00199192	0.0123903	3.20681	BLOOD_vs_HCC
KMT2C	1726.73	1.69105	0.547378	3.08937	0.00200581	0.0133978	2.9475	BLOOD_vs_HCC
RAD54L2	563.981	3.88672	1.25812	3.08931	0.00200619	0.0134999	2.92032	BLOOD_vs_HCC
TM9SF2	1106.32	2.33915	0.757181	3.08929	0.00200635	0.0135069	2.91363	BLOOD_vs_HCC
ARL2BP	173.524	-3.47997	1.12903	-3.08227	0.00205428	0.128199	0.149408	BLOOD_vs_HCC
FLNA	3543.67	1.34883	0.437615	3.08224	0.00205452	0.0137552	2.91363	BLOOD_vs_HCC
VAMP2	615.708	-1.96348	0.637469	-3.08011	0.00206922	0.0137552	2.92032	BLOOD_vs_HCC
COX7B	651.142	-2.06406	0.670561	-3.07811	0.00208316	0.0133978	3.0626	BLOOD_vs_HCC
SPON2	50.47	-7.63876	2.482	-3.07767	0.00208626	0.16214	0.10938	BLOOD_vs_HCC
MRFAP1L1	1423.44	1.96655	0.640391	3.07087	0.00213438	0.0154035	2.63024	BLOOD_vs_HCC
TMEM120A	248.529	-3.16639	1.03121	-3.07054	0.00213672	0.0765594	0.332526	BLOOD_vs_HCC
NXF1	794.887	3.03541	0.989762	3.06681	0.0021636	0.0142291	2.92829	BLOOD_vs_HCC
TUBA1B	673.913	-2.05709	0.671093	-3.06528	0.00217469	0.0155433	2.64633	BLOOD_vs_HCC
EFNB1	233.488	-5.33789	1.7417	-3.06477	0.00217841	0.0443029	0.700022	BLOOD_vs_HCC
FXYD7	172.137	-3.53543	1.15409	-3.06339	0.00218847	0.0995312	0.231046	BLOOD_vs_HCC
CNBP	5273.34	1.25492	0.409813	3.06218	0.00219731	0.0143985	2.92829	BLOOD_vs_HCC
SLC7A5	184.637	-5.60032	1.83069	-3.05913	0.00221982	0.100485	0.230759	BLOOD_vs_HCC
IKBKB	726.359	2.38791	0.781302	3.05632	0.00224073	0.0146299	2.92829	BLOOD_vs_HCC
ARMCX3	480.1	-2.38055	0.778972	-3.05602	0.00224296	0.0137552	3.16329	BLOOD_vs_HCC
ARHGEF6	1989.2	1.91454	0.626805	3.05444	0.00225483	0.0160302	2.64633	BLOOD_vs_HCC
FIS1	523.141	-2.42164	0.792972	-3.05387	0.00225907	0.0137552	3.20681	BLOOD_vs_HCC
ITM2A	887.065	-2.14347	0.701956	-3.05356	0.00226142	0.0160436	2.64633	BLOOD_vs_HCC
NELFCD	1147.25	2.70097	0.884592	3.05335	0.00226301	0.0146527	2.9475	BLOOD_vs_HCC
CITED2	600.485	-2.17234	0.711596	-3.05277	0.0022674	0.0137552	3.20681	BLOOD_vs_HCC
DPAGT1	532.167	3.19908	1.04807	3.05236	0.00227047	0.0148111	2.92032	BLOOD_vs_HCC
GCSAM	540.397	3.22196	1.05599	3.05112	0.00227988	0.0143103	3.0626	BLOOD_vs_HCC
NBL1	102.552	-6.61221	2.1695	-3.04781	0.00230519	0.287966	0.0503501	BLOOD_vs_HCC
HLA-G	364.686	6.73213	2.20917	3.04736	0.00230862	0.0144264	3.06512	BLOOD_vs_HCC
PDCD6	863.137	2.10341	0.690583	3.04584	0.00232028	0.0163639	2.63024	BLOOD_vs_HCC
ADD3	1669.28	1.90244	0.624637	3.04567	0.00232165	0.0163599	2.64633	BLOOD_vs_HCC
CCL5	118.458	-5.65347	1.8568	-3.04474	0.00232883	0.220084	0.0767671	BLOOD_vs_HCC
NDUFB2	708.16	-1.89148	0.621354	-3.04412	0.00233362	0.0163639	2.64633	BLOOD_vs_HCC
CERS5	549.4	3.84901	1.26479	3.0432	0.00234076	0.0140828	3.20681	BLOOD_vs_HCC
KDM1A	479.241	-2.55096	0.839801	-3.03758	0.00238488	0.015474	2.92032	BLOOD_vs_HCC
STK3	26.8155	15.7262	5.17748	3.03742	0.00238615	1	0	BLOOD_vs_HCC
PLOD1	27.1697	15.6624	5.16102	3.03475	0.00240735	1	0	BLOOD_vs_HCC
TNFRSF4	380.179	-3.06041	1.00864	-3.0342	0.00241174	0.0149626	3.06512	BLOOD_vs_HCC
EZH1	886.438	2.3077	0.76106	3.03221	0.00242769	0.0157066	2.91363	BLOOD_vs_HCC
CDC25B	1140.11	1.90511	0.628548	3.03097	0.00243769	0.0169981	2.64633	BLOOD_vs_HCC
LPXN	1729.85	1.46462	0.483342	3.03019	0.00244398	0.0170571	2.63024	BLOOD_vs_HCC
EPS8	83.0951	-6.66042	2.20088	-3.02625	0.00247607	0.229595	0.0767671	BLOOD_vs_HCC
CHMP7	756.112	2.44876	0.810065	3.02292	0.00250346	0.0173059	2.64633	BLOOD_vs_HCC
PRR7	176.694	-4.45882	1.47646	-3.01995	0.0025282	0.112361	0.22353	BLOOD_vs_HCC
UCP2	3817.82	1.28362	0.425416	3.01733	0.00255013	0.0162683	2.92829	BLOOD_vs_HCC
AAAS	552.954	3.25578	1.07921	3.01682	0.00255439	0.0157066	3.06512	BLOOD_vs_HCC
MAZ	133.058	-3.98341	1.32054	-3.0165	0.0025571	0.304134	0.0503501	BLOOD_vs_HCC
PFDN5	3025.3	-1.08907	0.36147	-3.01291	0.0025876	0.0179042	2.63024	BLOOD_vs_HCC
ATF7IP	1471.17	1.56312	0.519015	3.01171	0.00259784	0.0163639	2.9475	BLOOD_vs_HCC
TIPARP	614.928	-2.08576	0.693266	-3.00861	0.00262448	0.0160436	3.06512	BLOOD_vs_HCC
RPL27A	3148.45	-1.31867	0.440032	-2.99675	0.00272871	0.0170535	2.9475	BLOOD_vs_HCC
NR4A2	907.936	-7.10519	2.37162	-2.99593	0.00273612	0.0170571	2.9475	BLOOD_vs_HCC
SEC31B	486.772	3.66949	1.22542	2.99447	0.00274924	0.0160436	3.20681	BLOOD_vs_HCC
RHOB	290.796	-5.07721	1.6972	-2.99152	0.00277589	0.0550327	0.672881	BLOOD_vs_HCC
UQCRFS1	559.843	-1.96795	0.65803	-2.99067	0.00278369	0.0167879	3.06512	BLOOD_vs_HCC
RSU1	915.04	2.04567	0.684724	2.98758	0.00281196	0.0192582	2.63024	BLOOD_vs_HCC
TSG101	512.781	3.14347	1.05415	2.982	0.00286367	0.0171209	3.06512	BLOOD_vs_HCC
NAXD	24.3363	15.8053	5.30337	2.98024	0.00288025	1	0	BLOOD_vs_HCC
CCR4	390.442	-3.03148	1.01733	-2.97983	0.00288405	0.0179424	2.92032	BLOOD_vs_HCC
COBL	25.6697	15.8627	5.32441	2.97923	0.00288971	1	0	BLOOD_vs_HCC
FES	277.736	-3.63153	1.21936	-2.97822	0.0028993	0.054811	0.709168	BLOOD_vs_HCC
TAF1D	578.936	-2.04877	0.687951	-2.97808	0.0029006	0.0167492	3.20681	BLOOD_vs_HCC
LMAN1	728.737	-1.84832	0.620712	-2.97774	0.00290378	0.0180448	2.91363	BLOOD_vs_HCC
ALKBH7	297.521	-2.59449	0.871834	-2.9759	0.00292134	0.0550222	0.709168	BLOOD_vs_HCC
PRDX5	649.372	-1.84783	0.621238	-2.97443	0.00293533	0.0174587	3.06512	BLOOD_vs_HCC
STUB1	180.86	-3.21564	1.08415	-2.96604	0.00301662	0.124073	0.230759	BLOOD_vs_HCC
SH3BGRL3	5200.32	-1.09442	0.36927	-2.96374	0.00303928	0.0206395	2.63024	BLOOD_vs_HCC
SNRPB2	512.652	-2.27795	0.768711	-2.96333	0.00304328	0.0180226	3.0626	BLOOD_vs_HCC
WAS	264.181	-3.38448	1.14227	-2.96295	0.00304711	0.0586945	0.672881	BLOOD_vs_HCC
AHI1	405.931	-2.33921	0.789678	-2.96224	0.00305411	0.0173924	3.20681	BLOOD_vs_HCC
MYD88	723.64	2.38247	0.805141	2.95907	0.00308567	0.020792	2.64633	BLOOD_vs_HCC
IDH3B	696.846	2.56064	0.866791	2.95416	0.00313522	0.0209846	2.64633	BLOOD_vs_HCC
MCM7	564.232	2.85523	0.966512	2.95415	0.00313527	0.018504	3.0626	BLOOD_vs_HCC
NDUFS2	857.051	2.09273	0.708874	2.95219	0.00315531	0.0210486	2.64633	BLOOD_vs_HCC
HMGB3	67.4042	-5.15012	1.74508	-2.95123	0.00316514	0.21172	0.110809	BLOOD_vs_HCC
PZP	314.275	6.51792	2.20994	2.94936	0.00318428	0.0594407	0.686119	BLOOD_vs_HCC
MYL6	5486.22	-1.06003	0.359651	-2.94737	0.00320489	0.0214032	2.63024	BLOOD_vs_HCC
CCNL2	1412.23	1.86903	0.634333	2.94646	0.00321438	0.0213715	2.64633	BLOOD_vs_HCC
DLST	101.034	-4.21096	1.42952	-2.94572	0.00322207	0.133577	0.22353	BLOOD_vs_HCC
SVIP	244.1	-2.89403	0.983005	-2.94407	0.0032393	0.0598885	0.686119	BLOOD_vs_HCC
SRRM1	1045.95	-1.51045	0.513338	-2.94241	0.00325669	0.0216773	2.63024	BLOOD_vs_HCC
RMDN1	306.642	6.48263	2.20414	2.94111	0.00327037	0.0612917	0.672881	BLOOD_vs_HCC
EPHA4	342.682	6.64391	2.26024	2.93947	0.00328778	0.0597976	0.700022	BLOOD_vs_HCC
LTB	5649.85	-1.19155	0.406023	-2.93469	0.00333883	0.0204478	2.92829	BLOOD_vs_HCC
PDIA3	2521.09	-1.12764	0.384251	-2.93464	0.0033393	0.0220811	2.63024	BLOOD_vs_HCC
ZNF638	1303.18	1.91769	0.653799	2.93315	0.00335541	0.0220811	2.64633	BLOOD_vs_HCC
GAS5	1270.11	-1.60816	0.549777	-2.9251	0.00344341	0.020968	2.91363	BLOOD_vs_HCC
KLHL6	549.021	-1.9665	0.672351	-2.92482	0.00344658	0.020968	2.92032	BLOOD_vs_HCC
PPP4R2	264.039	-2.85146	0.974941	-2.92476	0.00344726	0.0618747	0.700022	BLOOD_vs_HCC
H2AFX	144.798	-4.17408	1.42925	-2.92046	0.0034951	0.138009	0.231046	BLOOD_vs_HCC
USP24	477.898	4.66118	1.59614	2.92029	0.00349707	0.0204478	3.06512	BLOOD_vs_HCC
WASHC1	67.4611	-5.14495	1.76221	-2.9196	0.0035048	0.174531	0.164052	BLOOD_vs_HCC
DPP8	499.835	3.10541	1.06373	2.91937	0.00350734	0.0204733	3.06512	BLOOD_vs_HCC
ICAM3	682.133	-1.80125	0.618122	-2.91406	0.00356757	0.0213316	2.9475	BLOOD_vs_HCC
AC022182.2	57.5744	-6.61119	2.27103	-2.91109	0.00360167	0.244471	0.10137	BLOOD_vs_HCC
UBAP2L	699.699	2.33071	0.801955	2.90628	0.00365755	0.0216891	2.9475	BLOOD_vs_HCC
ELL2	541.986	-4.34788	1.49914	-2.90026	0.00372851	0.020968	3.16329	BLOOD_vs_HCC
TPX2	37.4821	-8.89806	3.06906	-2.89927	0.00374029	0.253543	0.100163	BLOOD_vs_HCC
TMC8	906.836	2.03212	0.701069	2.8986	0.00374833	0.0243551	2.64633	BLOOD_vs_HCC
CNN2	1391.87	1.76597	0.609886	2.89558	0.00378462	0.0225546	2.91363	BLOOD_vs_HCC
EIF3D	2216.39	1.3597	0.469647	2.89516	0.00378965	0.0246144	2.63024	BLOOD_vs_HCC
RBM5	999.989	2.18445	0.756315	2.88828	0.00387351	0.0227818	2.9475	BLOOD_vs_HCC
S1PR2	305.123	6.47534	2.24519	2.8841	0.00392537	0.069894	0.686119	BLOOD_vs_HCC
NFX1	596.923	2.6022	0.902653	2.88283	0.0039412	0.0233574	2.92032	BLOOD_vs_HCC
DDOST	1970.68	1.33575	0.463502	2.88186	0.00395334	0.0253506	2.63024	BLOOD_vs_HCC
PSMA4	1166.76	1.83916	0.638756	2.87929	0.00398575	0.0254772	2.63024	BLOOD_vs_HCC
NSA2	443.929	-2.80875	0.97667	-2.87584	0.00402949	0.0219263	3.20681	BLOOD_vs_HCC
BCAR3	75.6756	-7.60026	2.64873	-2.8694	0.00411247	0.405402	0.0503501	BLOOD_vs_HCC
EIF5	1746.07	-1.49156	0.52041	-2.86612	0.00415541	0.0243609	2.92829	BLOOD_vs_HCC
TAOK3	1124.41	1.88254	0.656887	2.86586	0.00415884	0.0261727	2.64633	BLOOD_vs_HCC
PSMB4	1131.91	1.79164	0.625236	2.86555	0.0041629	0.0244483	2.91363	BLOOD_vs_HCC
COX16	109.816	-4.07333	1.42222	-2.86407	0.00418241	0.143866	0.260864	BLOOD_vs_HCC
SAMHD1	2316.17	1.35426	0.472992	2.86319	0.00419402	0.0263114	2.64633	BLOOD_vs_HCC
DDX56	529.474	2.75863	0.96351	2.86311	0.00419511	0.0236685	3.0626	BLOOD_vs_HCC
AP2M1	1567.88	1.47583	0.516227	2.85888	0.00425134	0.0248473	2.91363	BLOOD_vs_HCC
MZT2A	151.322	-3.77863	1.32222	-2.85779	0.00426609	0.21172	0.149408	BLOOD_vs_HCC
BBX	1136.41	2.00716	0.702637	2.85661	0.00428192	0.0267789	2.64633	BLOOD_vs_HCC
ARHGAP1	509.2	3.13235	1.09691	2.85561	0.00429539	0.0249669	2.92032	BLOOD_vs_HCC
PTGES3	1698.85	-1.27324	0.446311	-2.85282	0.00433332	0.0249669	2.9475	BLOOD_vs_HCC
RNMT	361.259	-2.2855	0.801279	-2.85231	0.00434028	0.0243551	3.06512	BLOOD_vs_HCC
UBA3	784.995	2.11944	0.743371	2.85112	0.00435661	0.0251732	2.92829	BLOOD_vs_HCC
COX7A2	958.236	-1.58066	0.55582	-2.84384	0.00445741	0.0255515	2.92829	BLOOD_vs_HCC
DENND2D	763.806	2.07695	0.732078	2.83706	0.00455314	0.0260664	2.91363	BLOOD_vs_HCC
MOB3A	1075.4	1.71018	0.602808	2.83702	0.00455368	0.0259799	2.92829	BLOOD_vs_HCC
VCL	1016.42	2.20968	0.779345	2.8353	0.00457826	0.0284078	2.63024	BLOOD_vs_HCC
ZC3HC1	271.431	6.30671	2.22474	2.83481	0.00458525	0.128456	0.332526	BLOOD_vs_HCC
IL11RA	450.848	4.57576	1.61513	2.83306	0.00461048	0.0248473	3.16329	BLOOD_vs_HCC
CD82	368.734	-2.41558	0.85283	-2.83242	0.00461965	0.0254007	3.0626	BLOOD_vs_HCC
CD151	276.546	-2.94315	1.04005	-2.82982	0.00465745	0.078993	0.686119	BLOOD_vs_HCC
GHITM	1805.33	1.42968	0.505258	2.82961	0.00466048	0.0263811	2.92829	BLOOD_vs_HCC
HILPDA	166.965	-5.31294	1.87965	-2.82657	0.00470499	0.160499	0.250299	BLOOD_vs_HCC
PRR14L	530.116	2.76026	0.977627	2.82343	0.00475131	0.0259382	3.06512	BLOOD_vs_HCC
HMGB2	638.717	-1.78686	0.632934	-2.82314	0.00475561	0.0251322	3.20681	BLOOD_vs_HCC
SLC40A1	367.259	6.74375	2.39125	2.82018	0.00479971	0.0252844	3.20681	BLOOD_vs_HCC
NDUFC2	442.897	-2.63183	0.933748	-2.81856	0.0048239	0.0261907	3.0626	BLOOD_vs_HCC
GUK1	1469.25	-1.48216	0.526048	-2.81754	0.00483932	0.0295717	2.64633	BLOOD_vs_HCC
SYTL1	1426.06	1.72666	0.613384	2.81497	0.00487811	0.0276017	2.91363	BLOOD_vs_HCC
PGAP1	401.626	-3.76843	1.34021	-2.81183	0.00492613	0.025745	3.20681	BLOOD_vs_HCC
NDUFA1	781.094	-1.72993	0.615765	-2.80939	0.00496354	0.0278785	2.92829	BLOOD_vs_HCC
ZNF550	329.829	6.58726	2.34839	2.80501	0.00503144	0.0810665	0.709168	BLOOD_vs_HCC
BACE2	287.372	-2.46986	0.88063	-2.80465	0.00503709	0.08107	0.709168	BLOOD_vs_HCC
APP	181.852	-3.18245	1.13498	-2.80397	0.00504778	0.17748	0.231046	BLOOD_vs_HCC
SLFN12L	37.5278	-8.70428	3.10467	-2.80361	0.0050534	0.301039	0.10137	BLOOD_vs_HCC
PABPC4	740.002	-1.85116	0.660429	-2.80296	0.00506362	0.0283087	2.92829	BLOOD_vs_HCC
TMBIM6	6085.2	0.882074	0.314926	2.80089	0.00509618	0.0283087	2.9475	BLOOD_vs_HCC
LST1	230.058	-2.82488	1.01019	-2.79638	0.00516789	0.0847387	0.672881	BLOOD_vs_HCC
CCR2	1061.7	2.42261	0.866546	2.7957	0.00517869	0.0286307	2.9475	BLOOD_vs_HCC
PERP	195.697	-5.11402	1.82983	-2.7948	0.00519318	0.185441	0.22353	BLOOD_vs_HCC
HIST1H2BN	113.865	-3.75556	1.34693	-2.78822	0.00529978	0.368942	0.0767671	BLOOD_vs_HCC
METTL3	572.144	2.87651	1.03207	2.78714	0.00531753	0.0283806	3.0626	BLOOD_vs_HCC
GALT	935.098	1.8179	0.652326	2.7868	0.00532317	0.0292494	2.9475	BLOOD_vs_HCC
CEBPB	114.012	-3.7453	1.34476	-2.7851	0.00535106	0.170142	0.260864	BLOOD_vs_HCC
ZNF593	52.8299	-5.59018	2.00726	-2.78498	0.00535316	0.29555	0.110809	BLOOD_vs_HCC
GOLGA8A	292.187	6.41204	2.30445	2.78246	0.00539488	0.0848541	0.700022	BLOOD_vs_HCC
BIN1	511.462	2.70651	0.972998	2.78162	0.00540877	0.028711	3.06512	BLOOD_vs_HCC
PUM2	940.809	2.08966	0.751928	2.77906	0.00545157	0.0298356	2.9475	BLOOD_vs_HCC
SMAD2	727.716	2.18433	0.786049	2.77887	0.00545476	0.0298356	2.9475	BLOOD_vs_HCC
LAIR1	477.571	3.03715	1.09309	2.77849	0.00546117	0.0289241	3.0626	BLOOD_vs_HCC
C6orf226	130.854	-3.65678	1.31735	-2.77587	0.00550549	0.173557	0.260864	BLOOD_vs_HCC
FBXL22	77.5233	-6.20327	2.23666	-2.77346	0.0055464	0.48535	0.0503501	BLOOD_vs_HCC
GRINA	220.621	-3.24783	1.17189	-2.77144	0.0055809	0.0862891	0.709168	BLOOD_vs_HCC
GPBP1	1232.53	-1.66588	0.602116	-2.7667	0.00566265	0.0308319	2.9475	BLOOD_vs_HCC
DRAM2	464.186	4.61797	1.67032	2.76471	0.00569728	0.0288618	3.20681	BLOOD_vs_HCC
ZNF655	919.692	1.91748	0.693929	2.76323	0.00572331	0.0314515	2.91363	BLOOD_vs_HCC
CALM3	742.219	-1.64643	0.59604	-2.76228	0.00573992	0.0340925	2.63024	BLOOD_vs_HCC
SNX9	217.783	-3.10337	1.12404	-2.76091	0.005764	0.151862	0.332526	BLOOD_vs_HCC
GPSM3	1248.64	-1.39925	0.507133	-2.75913	0.0057955	0.034271	2.63024	BLOOD_vs_HCC
STK17A	821.148	-2.06635	0.749263	-2.75785	0.00581834	0.0342471	2.64633	BLOOD_vs_HCC
C17orf107	85.1302	-5.77248	2.09399	-2.75669	0.00583898	0.181417	0.260864	BLOOD_vs_HCC
TRIM27	858.085	2.09372	0.759691	2.75602	0.00585095	0.0316653	2.9475	BLOOD_vs_HCC
LARS	984.175	1.78167	0.646644	2.75525	0.00586466	0.0344185	2.64633	BLOOD_vs_HCC
LARP1	836.537	2.83645	1.03044	2.75266	0.00591141	0.0320574	2.92829	BLOOD_vs_HCC
IL16	1389.31	1.47126	0.534672	2.75172	0.00592839	0.031988	2.9475	BLOOD_vs_HCC
RAC1	688.507	-1.98391	0.721043	-2.75144	0.00593338	0.0322901	2.91363	BLOOD_vs_HCC
PNPLA2	323.364	-2.37753	0.864375	-2.75058	0.00594897	0.0927652	0.686119	BLOOD_vs_HCC
PRELID1	391.983	-2.28204	0.830158	-2.74892	0.00597914	0.0300135	3.20681	BLOOD_vs_HCC
ARID1A	756.584	2.44956	0.891194	2.74863	0.00598453	0.0324712	2.91363	BLOOD_vs_HCC
MT-CO1	68059.5	0.798175	0.290447	2.74809	0.00599436	0.0324101	2.92829	BLOOD_vs_HCC
COG4	781.688	3.00903	1.09537	2.74705	0.00601332	0.0352038	2.63024	BLOOD_vs_HCC
NORAD	486.511	-2.17325	0.791722	-2.74497	0.00605165	0.0307487	3.16329	BLOOD_vs_HCC
CYTOR	255.115	-2.85468	1.04112	-2.74194	0.00610768	0.0926723	0.709168	BLOOD_vs_HCC
ELOVL5	2483.06	-1.26899	0.463392	-2.73848	0.00617241	0.0359196	2.63024	BLOOD_vs_HCC
CISD2	189.692	-2.95332	1.07998	-2.73461	0.00624533	0.193901	0.250299	BLOOD_vs_HCC
DOCK9	247.618	6.17443	2.25942	2.73275	0.00628075	0.160822	0.332526	BLOOD_vs_HCC
S100A10	3076.29	-0.950649	0.347897	-2.73256	0.00628445	0.0334571	2.9475	BLOOD_vs_HCC
SCAND1	409.99	-2.39563	0.877021	-2.73155	0.0063037	0.0314515	3.20681	BLOOD_vs_HCC
RAP1GAP2	414.687	3.43118	1.25673	2.73024	0.00632878	0.0318667	3.16329	BLOOD_vs_HCC
SLC5A6	631.147	5.06647	1.85599	2.72979	0.00633752	0.0315726	3.20681	BLOOD_vs_HCC
ZNF410	137.753	-4.16462	1.52628	-2.7286	0.0063604	0.211576	0.22353	BLOOD_vs_HCC
KDM3A	502.667	2.68027	0.984076	2.72364	0.00645672	0.0331534	3.06512	BLOOD_vs_HCC
CDK11A	184.83	-3.09283	1.13594	-2.7227	0.00647499	0.277528	0.149408	BLOOD_vs_HCC
SMAP1	453.39	-2.02338	0.743598	-2.72107	0.00650708	0.0324715	3.16329	BLOOD_vs_HCC
TSC2	240.984	6.13528	2.25686	2.7185	0.00655787	0.101604	0.672881	BLOOD_vs_HCC
SNRNP200	1544.91	1.39316	0.512606	2.71779	0.00657191	0.0345776	2.9475	BLOOD_vs_HCC
GLOD4	652.407	2.22204	0.818213	2.71573	0.00661307	0.0337833	3.0626	BLOOD_vs_HCC
SRSF5	3983.01	0.938099	0.345698	2.71364	0.00665487	0.0349629	2.9475	BLOOD_vs_HCC
FGD3	1375.66	1.669	0.615156	2.71313	0.00666516	0.0380719	2.63024	BLOOD_vs_HCC
WIPI1	290.464	6.40327	2.36057	2.71259	0.00667594	0.167995	0.332526	BLOOD_vs_HCC
RHEB	296.567	-2.47286	0.911729	-2.71228	0.00668221	0.167995	0.332526	BLOOD_vs_HCC
PAN2	452.669	2.95607	1.08992	2.71219	0.00668412	0.0332065	3.16329	BLOOD_vs_HCC
MACF1	4006.05	1.2976	0.478621	2.71111	0.00670576	0.0380719	2.64633	BLOOD_vs_HCC
SNX27	496.815	2.66189	0.981887	2.711	0.00670806	0.0341396	3.06512	BLOOD_vs_HCC
ASNSD1	291.116	6.40664	2.36396	2.71013	0.0067256	0.103413	0.672881	BLOOD_vs_HCC
SERBP1	753.693	-1.69776	0.627158	-2.70707	0.00678805	0.0355844	2.92829	BLOOD_vs_HCC
COX5B	877.003	-1.60308	0.592696	-2.70472	0.00683612	0.0359196	2.91363	BLOOD_vs_HCC
SPAG1	38.0794	-7.05545	2.60978	-2.70347	0.00686205	0.348451	0.10938	BLOOD_vs_HCC
PSMC2	986.127	1.78425	0.660066	2.70314	0.00686878	0.0389411	2.64633	BLOOD_vs_HCC
ITGAM	649.203	2.45133	0.907299	2.70179	0.00689681	0.0336981	3.20681	BLOOD_vs_HCC
ARPC1A	147.671	-3.22914	1.19693	-2.69786	0.00697861	0.219839	0.230759	BLOOD_vs_HCC
PPOX	524.615	3.17679	1.17803	2.6967	0.00700311	0.0352038	3.0626	BLOOD_vs_HCC
RARG	428.59	4.50123	1.66972	2.69579	0.00702214	0.0352193	3.06512	BLOOD_vs_HCC
MMS19	541.556	2.45364	0.910835	2.69384	0.0070634	0.0367033	2.92032	BLOOD_vs_HCC
BLCAP	508.994	2.69868	1.00248	2.692	0.00710241	0.0368532	2.92032	BLOOD_vs_HCC
PPAN	61.2578	-4.97847	1.84953	-2.69175	0.00710787	0.373951	0.100163	BLOOD_vs_HCC
TRAPPC2B	78.125	-4.39247	1.63477	-2.68691	0.00721158	0.569902	0.0503501	BLOOD_vs_HCC
UROD	505.296	2.68734	1.00044	2.68616	0.00722781	0.0352038	3.16329	BLOOD_vs_HCC
LMNA	3016.22	-4.62997	1.72545	-2.68334	0.00728906	0.0406332	2.64633	BLOOD_vs_HCC
C2orf68	579.989	2.27875	0.84939	2.68281	0.00730062	0.0352025	3.20681	BLOOD_vs_HCC
PDHB	564.743	2.51705	0.938337	2.68246	0.00730832	0.0377059	2.92032	BLOOD_vs_HCC
PRPSAP2	426.801	3.47361	1.29532	2.68167	0.00732563	0.0364242	3.06512	BLOOD_vs_HCC
TRAF6	555.252	2.49116	0.929481	2.68016	0.00735876	0.036514	3.0626	BLOOD_vs_HCC
FUBP1	900.047	1.88415	0.703549	2.67807	0.00740484	0.0412504	2.63024	BLOOD_vs_HCC
LINC00324	230.429	6.06984	2.26706	2.6774	0.00741953	0.110704	0.672881	BLOOD_vs_HCC
MTRF1	255.313	6.21739	2.32313	2.6763	0.0074439	0.181417	0.332526	BLOOD_vs_HCC
MAFF	148.358	-5.12365	1.91516	-2.67532	0.00746589	0.301584	0.149408	BLOOD_vs_HCC
CKS2	78.7515	-4.30738	1.61086	-2.67397	0.00749594	0.449287	0.0767671	BLOOD_vs_HCC
CDC26	133.058	-3.53402	1.32233	-2.67257	0.00752737	0.586268	0.0503501	BLOOD_vs_HCC
PLEKHG3	411.168	3.41958	1.28054	2.67043	0.00757553	0.0361064	3.20681	BLOOD_vs_HCC
DDX21	1041.74	-2.29474	0.859433	-2.67007	0.00758362	0.0415803	2.64633	BLOOD_vs_HCC
GIMAP1	649.782	2.21572	0.830316	2.66852	0.00761852	0.0375337	3.0626	BLOOD_vs_HCC
STT3A	1613.56	1.99767	0.750069	2.66331	0.00773751	0.042451	2.63024	BLOOD_vs_HCC
THYN1	559.728	2.50344	0.940314	2.66234	0.00775996	0.0396972	2.92032	BLOOD_vs_HCC
PSMB8	2057.76	1.40584	0.528558	2.65975	0.00781975	0.0426697	2.63024	BLOOD_vs_HCC
ZMYND8	410.409	4.43936	1.67007	2.65818	0.00785633	0.0375337	3.16329	BLOOD_vs_HCC
KANSL1	853.908	1.80112	0.677668	2.65783	0.0078646	0.0426697	2.64633	BLOOD_vs_HCC
LAPTM4A	745.428	-1.72914	0.651138	-2.65557	0.00791753	0.040017	2.9475	BLOOD_vs_HCC
TMC6	1627.1	1.5964	0.601182	2.65544	0.00792055	0.0401818	2.92829	BLOOD_vs_HCC
GSE1	530.369	2.42138	0.912402	2.65385	0.00795795	0.0403684	2.92032	BLOOD_vs_HCC
KIAA0040	685.217	2.29863	0.866251	2.65353	0.00796539	0.0403527	2.92829	BLOOD_vs_HCC
CRIP2	385.829	4.348	1.63866	2.65339	0.00796867	0.0375337	3.20681	BLOOD_vs_HCC
HNRNPAB	296.613	-3.03948	1.14698	-2.64999	0.00804949	0.115487	0.686119	BLOOD_vs_HCC
USP35	97.7486	-3.83195	1.44681	-2.64855	0.0080837	0.316094	0.149408	BLOOD_vs_HCC
ENSA	513.941	-1.90978	0.722361	-2.6438	0.00819814	0.0399342	3.0626	BLOOD_vs_HCC
NSMCE4A	535.117	2.43541	0.921841	2.6419	0.00824418	0.0412504	2.92032	BLOOD_vs_HCC
ZC3H11A	31.5397	-7.53247	2.85149	-2.64159	0.00825179	0.404417	0.10137	BLOOD_vs_HCC
XCL1	1022.77	-8.24072	3.12039	-2.64092	0.00826805	0.0412504	2.92829	BLOOD_vs_HCC
MSH2	428.953	4.50245	1.70566	2.63971	0.00829765	0.0414539	2.92032	BLOOD_vs_HCC
VPS13B	1148.82	2.02399	0.766915	2.63913	0.00831183	0.0412504	2.9475	BLOOD_vs_HCC
PTP4A1	391.492	3.34642	1.26855	2.63799	0.00833995	0.0415803	2.92032	BLOOD_vs_HCC
UQCRQ	586.142	-1.82086	0.690323	-2.6377	0.00834704	0.0389958	3.20681	BLOOD_vs_HCC
LY9	387.233	3.3294	1.26292	2.63628	0.00838213	0.0404882	3.0626	BLOOD_vs_HCC
THEMIS2	319.141	6.53947	2.48174	2.63503	0.008413	0.116563	0.709168	BLOOD_vs_HCC
PCGF3	526.003	2.7487	1.04333	2.63455	0.00842491	0.039304	3.20681	BLOOD_vs_HCC
CPNE1	1568.16	1.36075	0.516504	2.63454	0.00842508	0.0415803	2.9475	BLOOD_vs_HCC
ZNF397	217.433	5.98632	2.27324	2.63338	0.00845392	0.12116	0.672881	BLOOD_vs_HCC
COX17	174.377	-3.16083	1.20066	-2.63257	0.00847415	0.250464	0.230759	BLOOD_vs_HCC
YWHAE	639.518	-1.6713	0.635743	-2.62888	0.00856657	0.0423887	2.92032	BLOOD_vs_HCC
CD63	1363.68	-1.24837	0.4754	-2.62594	0.00864096	0.0426697	2.91363	BLOOD_vs_HCC
MPG	176.087	-3.10023	1.18246	-2.62183	0.0087458	0.333342	0.149408	BLOOD_vs_HCC
FARSA	433.298	2.89096	1.1034	2.62005	0.00879158	0.0430906	2.92032	BLOOD_vs_HCC
PRKCB	429.26	3.4821	1.32944	2.61923	0.00881297	0.0405982	3.20681	BLOOD_vs_HCC
PMAIP1	236.446	-2.69314	1.02917	-2.6168	0.00887583	0.12181	0.700022	BLOOD_vs_HCC
TAPBPL	479.41	3.0425	1.16269	2.61678	0.00887631	0.0407763	3.20681	BLOOD_vs_HCC
GMPPA	371.193	4.29093	1.63994	2.61651	0.00888343	0.0412504	3.16329	BLOOD_vs_HCC
KHDRBS1	897.969	-1.41472	0.540787	-2.61605	0.00889545	0.0431394	2.9475	BLOOD_vs_HCC
FAM3C	108.411	-3.60516	1.37882	-2.61468	0.00893117	0.645644	0.0503501	BLOOD_vs_HCC
TSEN54	751.424	-1.56325	0.598365	-2.61253	0.0089874	0.0474586	2.64633	BLOOD_vs_HCC
ZSCAN26	208.971	5.92931	2.2702	2.6118	0.00900676	0.246854	0.250299	BLOOD_vs_HCC
RBM39	2987.7	-0.995958	0.381502	-2.61063	0.00903766	0.0476593	2.64633	BLOOD_vs_HCC
MRPL23	39.0439	-5.99457	2.29815	-2.60843	0.00909579	0.429373	0.10137	BLOOD_vs_HCC
TSR2	521.503	2.39536	0.918834	2.60696	0.00913505	0.0427518	3.0626	BLOOD_vs_HCC
CD47	2475.48	1.61874	0.620942	2.60692	0.0091362	0.0483268	2.63024	BLOOD_vs_HCC
SLFN5	2628.05	1.03997	0.399154	2.60544	0.00917554	0.0444298	2.92829	BLOOD_vs_HCC
CTSO	392.968	3.35086	1.2863	2.60503	0.00918657	0.0415803	3.20681	BLOOD_vs_HCC
YES1	80.6088	-4.0636	1.56037	-2.60425	0.00920767	0.344815	0.149408	BLOOD_vs_HCC
MKS1	206.965	5.91558	2.27177	2.60395	0.00921552	0.344815	0.149408	BLOOD_vs_HCC
TPP1	655.298	2.02177	0.776667	2.60313	0.00923759	0.0417393	3.20681	BLOOD_vs_HCC
TLE1	161.74	-5.13662	1.97325	-2.60312	0.00923799	0.263373	0.231046	BLOOD_vs_HCC
CTDSP2	572.237	2.2576	0.867599	2.60212	0.00926481	0.0431483	3.06512	BLOOD_vs_HCC
AKAP9	2356.05	1.41973	0.545614	2.60208	0.00926596	0.04848	2.64633	BLOOD_vs_HCC
KAT2B	782.685	2.1146	0.812702	2.60194	0.00926983	0.0486698	2.63024	BLOOD_vs_HCC
SNHG7	176.211	-3.37975	1.29954	-2.60073	0.00930257	0.264392	0.231046	BLOOD_vs_HCC
TSPAN31	206.926	5.91525	2.27588	2.5991	0.00934681	0.265485	0.231046	BLOOD_vs_HCC
TNFSF11	211.249	-2.8517	1.09767	-2.59796	0.0093779	0.271788	0.22353	BLOOD_vs_HCC
MKRN2	936.308	3.00624	1.15735	2.59752	0.00938983	0.0450506	2.9475	BLOOD_vs_HCC
TXLNA	632.594	2.17496	0.838186	2.59484	0.00946361	0.0425279	3.20681	BLOOD_vs_HCC
SARS	1374.1	1.38689	0.534535	2.59458	0.00947064	0.0458441	2.91363	BLOOD_vs_HCC
BAIAP3	223.247	6.0253	2.32394	2.59271	0.00952241	0.129063	0.686119	BLOOD_vs_HCC
SF3A2	189.063	-2.96925	1.14553	-2.59204	0.00954081	0.269097	0.231046	BLOOD_vs_HCC
NUMB	525.637	2.40731	0.929303	2.59045	0.00958507	0.0444044	3.06512	BLOOD_vs_HCC
PSD4	475.832	3.03207	1.17049	2.59042	0.00958593	0.0444044	3.06512	BLOOD_vs_HCC
SLC35A4	776.501	2.72375	1.05314	2.58631	0.00970097	0.0462961	2.9475	BLOOD_vs_HCC
MTFR1L	474.218	3.02531	1.16983	2.58611	0.00970657	0.0448799	3.0626	BLOOD_vs_HCC
TMOD3	620.724	-1.81811	0.703344	-2.58495	0.00973941	0.043296	3.20681	BLOOD_vs_HCC
KIF22	612.859	2.36281	0.915473	2.58097	0.00985238	0.0473383	2.92032	BLOOD_vs_HCC
SH2D3C	354.331	4.22341	1.63783	2.57866	0.00991829	0.0474586	2.92032	BLOOD_vs_HCC
ANKRD37	114.717	-3.70038	1.43575	-2.57732	0.00995707	0.687443	0.0503501	BLOOD_vs_HCC
HK1	974.421	2.45329	0.95188	2.57731	0.00995731	0.0510719	2.64633	BLOOD_vs_HCC
GPR171	300.377	-2.42058	0.93965	-2.57605	0.00999369	0.134506	0.686119	BLOOD_vs_HCC
EEF2	5472.78	-0.782677	0.304002	-2.57458	0.0100363	0.048007	2.91363	BLOOD_vs_HCC
CPM	50.4652	-7.54492	2.93127	-2.57394	0.0100547	0.454018	0.10137	BLOOD_vs_HCC
PARVB	169.769	-3.31171	1.28781	-2.57157	0.0101238	0.285888	0.22353	BLOOD_vs_HCC
ULK3	501.164	3.10819	1.20999	2.56876	0.0102063	0.0455665	3.16329	BLOOD_vs_HCC
BPTF	1544.59	1.64072	0.639189	2.56688	0.0102619	0.052845	2.63024	BLOOD_vs_HCC
MDH1	914.092	1.6644	0.648677	2.56584	0.0102926	0.0486026	2.92829	BLOOD_vs_HCC
SNAP23	528.541	-1.95666	0.762816	-2.56504	0.0103163	0.0459353	3.16329	BLOOD_vs_HCC
MR1	197.473	5.84785	2.28139	2.56329	0.0103687	0.370311	0.149408	BLOOD_vs_HCC
CMIP	97.9735	-3.81732	1.48956	-2.56271	0.0103859	0.290689	0.22353	BLOOD_vs_HCC
SDR42E2	45.9866	-5.75698	2.24705	-2.56202	0.0104066	0.44015	0.110809	BLOOD_vs_HCC
MAPKAPK2	120.505	-5.26271	2.05481	-2.56117	0.0104319	0.371633	0.149408	BLOOD_vs_HCC
ORMDL1	1122.27	1.59079	0.621258	2.5606	0.0104491	0.0488289	2.9475	BLOOD_vs_HCC
CEBPD	44.8035	-6.58193	2.5714	-2.55967	0.0104773	0.352325	0.164052	BLOOD_vs_HCC
NMT2	693.125	1.92507	0.752925	2.55678	0.0105645	0.0495628	2.92829	BLOOD_vs_HCC
SCAPER	686.997	1.91148	0.747835	2.55602	0.0105878	0.0539844	2.64633	BLOOD_vs_HCC
SOX13	221.997	6.0154	2.35501	2.5543	0.0106403	0.228388	0.332526	BLOOD_vs_HCC
C19orf53	508.679	-2.16304	0.847152	-2.55331	0.0106704	0.0483268	3.06512	BLOOD_vs_HCC
IARS	572.239	2.25852	0.884585	2.5532	0.0106738	0.0473383	3.16329	BLOOD_vs_HCC
TCF25	1401.75	-1.23064	0.482083	-2.55275	0.0106876	0.0497328	2.9475	BLOOD_vs_HCC
AKIRIN2	571.318	-2.02763	0.794373	-2.55249	0.0106957	0.0484176	3.0626	BLOOD_vs_HCC
TRMT112	818.923	-1.50239	0.588924	-2.55108	0.010739	0.0546162	2.64633	BLOOD_vs_HCC
SIAH2	258.822	-3.30929	1.29736	-2.55078	0.0107481	0.139805	0.700022	BLOOD_vs_HCC
GADD45A	307.234	-4.32238	1.69526	-2.54968	0.0107822	0.143866	0.672881	BLOOD_vs_HCC
EIF2B5	563.973	2.23529	0.877496	2.54735	0.0108544	0.0474227	3.20681	BLOOD_vs_HCC
GTF2E1	398.586	4.39464	1.72678	2.545	0.0109278	0.049083	3.0626	BLOOD_vs_HCC
EFCAB2	85.6999	-5.59806	2.20079	-2.54366	0.0109699	0.272259	0.260864	BLOOD_vs_HCC
HMBOX1	390.045	3.34075	1.31383	2.54275	0.0109984	0.0483268	3.16329	BLOOD_vs_HCC
WBP1L	205.851	5.90678	2.32442	2.54119	0.0110477	0.299311	0.22353	BLOOD_vs_HCC
ZNF207	1511.82	1.67449	0.659073	2.54068	0.0110637	0.0510375	2.9475	BLOOD_vs_HCC
SUPT16H	747.294	1.87816	0.740699	2.53566	0.0112236	0.0561986	2.63024	BLOOD_vs_HCC
PBX4	183.325	-5.79372	2.28524	-2.53528	0.0112358	0.384989	0.149408	BLOOD_vs_HCC
RHNO1	195.266	5.83094	2.29995	2.53525	0.0112368	0.296589	0.231046	BLOOD_vs_HCC
CTNNBL1	428.842	2.87414	1.13457	2.53323	0.0113015	0.0504236	3.06512	BLOOD_vs_HCC
SLC12A7	356.465	4.23245	1.67372	2.52876	0.0114466	0.0508431	3.06512	BLOOD_vs_HCC
ZNF10	194.077	-4.69091	1.85597	-2.52747	0.0114887	0.30062	0.231046	BLOOD_vs_HCC
CPSF3	414.557	3.43017	1.35838	2.5252	0.0115633	0.0535634	2.92032	BLOOD_vs_HCC
ITGA1	287.948	6.39106	2.53356	2.52257	0.0116502	0.149914	0.686119	BLOOD_vs_HCC
CDK17	492.364	-1.90518	0.755441	-2.52195	0.0116707	0.0504236	3.16329	BLOOD_vs_HCC
CXCR4	1915.81	-1.58133	0.627413	-2.5204	0.0117222	0.0577101	2.64633	BLOOD_vs_HCC
BTG2	936.039	-1.80153	0.714795	-2.52035	0.0117239	0.053738	2.9475	BLOOD_vs_HCC
CAD	459.704	3.5836	1.42338	2.51767	0.0118133	0.0508431	3.16329	BLOOD_vs_HCC
ERH	299.995	-2.17412	0.865119	-2.51309	0.011968	0.150379	0.700022	BLOOD_vs_HCC
SCAMP2	823.966	2.37558	0.945486	2.51255	0.0119862	0.054811	2.92829	BLOOD_vs_HCC
MKKS	195.121	5.82965	2.32106	2.51163	0.0120173	0.40243	0.149408	BLOOD_vs_HCC
UBE2B	698.935	-1.88283	0.74982	-2.51104	0.0120374	0.0549759	2.92829	BLOOD_vs_HCC
CIAPIN1	357.055	3.20836	1.27827	2.50991	0.0120762	0.0510719	3.20681	BLOOD_vs_HCC
ITGA4	966.416	-1.48123	0.590551	-2.50822	0.0121341	0.0554165	2.91363	BLOOD_vs_HCC
CD52	4244.68	-0.980386	0.391373	-2.50499	0.0122454	0.055575	2.92829	BLOOD_vs_HCC
APOL3	843.657	1.91872	0.76618	2.50426	0.0122706	0.0556196	2.92829	BLOOD_vs_HCC
TNFRSF25	1519.88	1.3092	0.523061	2.50296	0.0123161	0.0557557	2.92829	BLOOD_vs_HCC
CEPT1	342.456	4.17343	1.6676	2.50266	0.0123265	0.155213	0.686119	BLOOD_vs_HCC
PPIL1	240.698	6.1323	2.45243	2.5005	0.0124018	0.153687	0.700022	BLOOD_vs_HCC
NDUFB1	235.215	-2.72061	1.08956	-2.49698	0.0125257	0.154841	0.700022	BLOOD_vs_HCC
SOD2	373.577	-1.96515	0.787138	-2.49658	0.0125398	0.054811	3.06512	BLOOD_vs_HCC
KIT	1304.52	-1.58654	0.635672	-2.49585	0.0125657	0.0604565	2.63024	BLOOD_vs_HCC
TMEM173	906.759	1.65175	0.663374	2.48992	0.0127773	0.0573415	2.92829	BLOOD_vs_HCC
NBPF14	119.264	-3.41851	1.37402	-2.48797	0.0128475	0.299152	0.260864	BLOOD_vs_HCC
SMC1A	683.699	1.9038	0.765612	2.48664	0.0128956	0.0577101	2.92829	BLOOD_vs_HCC
FBXO3	540.326	2.44918	0.985153	2.48609	0.0129155	0.0557655	3.0626	BLOOD_vs_HCC
POMP	462.543	-1.87766	0.755319	-2.48592	0.0129217	0.0557655	3.06512	BLOOD_vs_HCC
NDUFA10	826.679	1.88627	0.759105	2.48486	0.0129604	0.0577101	2.92829	BLOOD_vs_HCC
NCOA1	537.964	2.16274	0.870649	2.48405	0.0129897	0.0545859	3.20681	BLOOD_vs_HCC
UBE2L6	1399.84	1.41744	0.570889	2.48286	0.0130334	0.0581358	2.91363	BLOOD_vs_HCC
MSRB1	191.213	5.80132	2.33767	2.48167	0.0130767	0.308978	0.250299	BLOOD_vs_HCC
DKC1	630.604	1.96152	0.790449	2.48153	0.0130819	0.0561986	3.06512	BLOOD_vs_HCC
GLIPR1	1382.91	-1.18618	0.478354	-2.47972	0.0131485	0.0622808	2.64633	BLOOD_vs_HCC
EMP3	2662.08	-0.910049	0.367218	-2.47823	0.0132037	0.0581473	2.9475	BLOOD_vs_HCC
ANAPC11	474.939	-1.94931	0.787012	-2.47685	0.0132548	0.0586945	2.92032	BLOOD_vs_HCC
NNT	533.013	2.76782	1.11766	2.47645	0.0132698	0.0586945	2.92032	BLOOD_vs_HCC
ATXN7L1	197.937	5.84992	2.36334	2.47527	0.0133135	0.33682	0.22353	BLOOD_vs_HCC
XPO6	363.859	3.2374	1.30795	2.47517	0.0133173	0.0553289	3.20681	BLOOD_vs_HCC
HDAC3	479.48	2.60784	1.05382	2.47466	0.0133363	0.0589168	2.92032	BLOOD_vs_HCC
ITGAV	209.402	-3.87509	1.56689	-2.4731	0.0133946	0.31351	0.250299	BLOOD_vs_HCC
AC058791.1	498.204	3.10102	1.25436	2.47221	0.0134282	0.0590353	2.92032	BLOOD_vs_HCC
ARPC5	1716.34	1.39843	0.566119	2.4702	0.0135037	0.0589613	2.9475	BLOOD_vs_HCC
FOSL2	535.178	-2.05344	0.831353	-2.46999	0.0135116	0.0577101	3.0626	BLOOD_vs_HCC
TOP2B	885.663	1.73207	0.701247	2.46998	0.013512	0.0589613	2.9475	BLOOD_vs_HCC
PREB	620.352	2.38139	0.965212	2.46722	0.0136166	0.0578537	3.0626	BLOOD_vs_HCC
MPV17	582.602	2.04708	0.830032	2.46627	0.0136529	0.059694	2.92032	BLOOD_vs_HCC
TSPAN3	652.131	2.01372	0.816885	2.46512	0.0136967	0.0561986	3.20681	BLOOD_vs_HCC
TDG	238.374	-3.42287	1.38895	-2.46437	0.0137255	0.269097	0.332526	BLOOD_vs_HCC
DYNLRB1	319.643	4.07148	1.65256	2.46374	0.0137498	0.165379	0.700022	BLOOD_vs_HCC
ZEB2	476.5	-2.48937	1.01058	-2.46331	0.013766	0.0598844	2.92032	BLOOD_vs_HCC
TRIP11	682.005	2.0835	0.846355	2.46173	0.0138269	0.0655843	2.63024	BLOOD_vs_HCC
UQCRC2	1160.4	1.55682	0.632517	2.46131	0.0138429	0.0601955	2.91363	BLOOD_vs_HCC
NENF	158.116	-4.80899	1.95406	-2.46102	0.0138541	0.321138	0.250299	BLOOD_vs_HCC
ZNF440	186.998	5.76816	2.34398	2.46084	0.0138613	0.345876	0.22353	BLOOD_vs_HCC
RALA	417.56	-1.87866	0.763927	-2.45921	0.0139244	0.0586945	3.06512	BLOOD_vs_HCC
MPP7	179.537	5.71032	2.32202	2.45921	0.0139244	0.438963	0.149408	BLOOD_vs_HCC
MPRIP	444.181	2.49172	1.0138	2.45781	0.0139789	0.0577101	3.16329	BLOOD_vs_HCC
SPAG9	598.335	-1.81514	0.739142	-2.45574	0.0140593	0.0589613	3.06512	BLOOD_vs_HCC
CHD2	1394.9	-1.55189	0.632047	-2.45534	0.014075	0.0662215	2.63024	BLOOD_vs_HCC
HSPA14	183.485	5.74274	2.3428	2.45123	0.014237	0.327965	0.250299	BLOOD_vs_HCC
PTPN7	1572.35	1.36498	0.556991	2.45063	0.0142605	0.0611527	2.9475	BLOOD_vs_HCC
THOC3	122.053	-3.27864	1.33978	-2.44715	0.0143992	0.666467	0.0767671	BLOOD_vs_HCC
USP33	730.866	2.00764	0.820441	2.44703	0.014404	0.0618747	2.92829	BLOOD_vs_HCC
FOXJ2	176.126	5.68257	2.32471	2.44442	0.0145086	0.348851	0.230759	BLOOD_vs_HCC
LAMP1	272.282	-2.70565	1.10704	-2.44403	0.0145243	0.176006	0.672881	BLOOD_vs_HCC
CBFA2T2	172.57	5.65322	2.31416	2.44288	0.0145706	0.332393	0.250299	BLOOD_vs_HCC
USP7	727.759	1.8358	0.751726	2.44211	0.0146018	0.0682152	2.63024	BLOOD_vs_HCC
ANAPC7	364.807	3.24058	1.32879	2.43875	0.0147381	0.0630367	2.92032	BLOOD_vs_HCC
IRS2	462.39	-2.03973	0.836399	-2.43871	0.0147399	0.0596079	3.16329	BLOOD_vs_HCC
PRDX2	916.95	-1.59352	0.653803	-2.4373	0.0147973	0.0627802	2.9475	BLOOD_vs_HCC
COG2	536.204	2.77716	1.14014	2.43582	0.0148583	0.0597976	3.16329	BLOOD_vs_HCC
PPP1R12A	1374.6	1.32337	0.543477	2.43501	0.0148913	0.0689846	2.64633	BLOOD_vs_HCC
ACTR5	191.57	5.80274	2.38355	2.43449	0.0149128	0.355404	0.230759	BLOOD_vs_HCC
RRBP1	526.813	-1.83247	0.752732	-2.43442	0.0149156	0.0598844	3.16329	BLOOD_vs_HCC
AARS	491.458	2.30456	0.947457	2.43237	0.0150005	0.059694	3.20681	BLOOD_vs_HCC
PRIM1	228.765	6.06099	2.49281	2.43139	0.0150412	0.174149	0.709168	BLOOD_vs_HCC
MARS	783.795	1.80348	0.741795	2.43124	0.0150472	0.069894	2.63024	BLOOD_vs_HCC
PARP2	187.805	5.77607	2.37653	2.43046	0.0150798	0.357158	0.230759	BLOOD_vs_HCC
CCNDBP1	1421.48	1.57588	0.648421	2.43034	0.0150848	0.0699844	2.63024	BLOOD_vs_HCC
PPWD1	466.634	2.56642	1.05604	2.43024	0.015089	0.0618747	3.06512	BLOOD_vs_HCC
IKZF1	2661.77	1.11872	0.460403	2.42988	0.0151038	0.0699921	2.63024	BLOOD_vs_HCC
NME3	286.432	-2.48527	1.023	-2.42939	0.0151241	0.181597	0.672881	BLOOD_vs_HCC
FGL2	308.151	-3.47077	1.42867	-2.42938	0.0151247	0.17604	0.700022	BLOOD_vs_HCC
TARSL2	406.794	-2.23567	0.920531	-2.42867	0.0151542	0.0620471	3.06512	BLOOD_vs_HCC
ZBTB10	118.635	-3.94745	1.62587	-2.4279	0.0151866	0.867906	0.0503501	BLOOD_vs_HCC
TMEM256	132.533	-3.17452	1.30846	-2.42615	0.0152599	0.689877	0.0767671	BLOOD_vs_HCC
SEC62	640.915	-1.55343	0.64132	-2.42224	0.0154253	0.0658204	2.92032	BLOOD_vs_HCC
GADD45G	666.976	-7.87726	3.25617	-2.41918	0.0155556	0.0662215	2.91363	BLOOD_vs_HCC
CASP10	348.067	3.17068	1.31091	2.41868	0.0155768	0.182986	0.686119	BLOOD_vs_HCC
C2CD5	620.566	2.99733	1.23926	2.41866	0.0155779	0.0662215	2.92032	BLOOD_vs_HCC
RHOC	211.646	-2.45249	1.01411	-2.41837	0.0155903	0.364609	0.231046	BLOOD_vs_HCC
KIAA0753	334.805	4.13922	1.71229	2.41736	0.0156334	0.292066	0.332526	BLOOD_vs_HCC
SLC25A5	1302.55	-1.2018	0.49781	-2.41418	0.0157706	0.0662215	2.9475	BLOOD_vs_HCC
QRICH1	767.391	1.91903	0.794927	2.4141	0.0157742	0.0662215	2.9475	BLOOD_vs_HCC
TBC1D10C	919.847	1.56428	0.648143	2.41348	0.0158011	0.0666913	2.92829	BLOOD_vs_HCC
AK5	310.787	4.03077	1.67678	2.40387	0.0162223	0.297315	0.332526	BLOOD_vs_HCC
EIF2B1	654.199	1.83469	0.763373	2.4034	0.0162432	0.0659589	3.06512	BLOOD_vs_HCC
CHMP4B	351.559	-8.16059	3.39628	-2.4028	0.0162701	0.189713	0.672881	BLOOD_vs_HCC
BAD	123.132	-3.21996	1.34038	-2.40227	0.0162935	0.715207	0.0767671	BLOOD_vs_HCC
NOSIP	986.809	1.67567	0.698144	2.40018	0.0163872	0.0682369	2.9475	BLOOD_vs_HCC
SRP14	1825.47	-1.03058	0.429832	-2.39763	0.0165013	0.0750011	2.63024	BLOOD_vs_HCC
PANK4	163.9	5.57896	2.32803	2.39643	0.0165558	0.376014	0.230759	BLOOD_vs_HCC
TRIM68	170.335	5.63369	2.35142	2.39587	0.0165811	0.38252	0.22353	BLOOD_vs_HCC
WDR81	176.462	5.68436	2.37341	2.39502	0.0166194	0.376599	0.230759	BLOOD_vs_HCC
NUP85	478.027	2.60313	1.0882	2.39214	0.0167504	0.0674794	3.0626	BLOOD_vs_HCC
USP39	486.561	2.28842	0.956848	2.39163	0.0167739	0.0674794	3.06512	BLOOD_vs_HCC
RBM4	275.293	-2.65638	1.11178	-2.38931	0.0168801	0.194662	0.672881	BLOOD_vs_HCC
TIMP1	1654.02	-1.14645	0.479947	-2.38869	0.0169085	0.0705711	2.91363	BLOOD_vs_HCC
MLLT3	420.775	2.84686	1.19184	2.38863	0.0169113	0.0679301	3.0626	BLOOD_vs_HCC
NFYB	337.318	3.12385	1.30787	2.3885	0.0169172	0.194947	0.672881	BLOOD_vs_HCC
VDAC3	1081.07	1.5299	0.640586	2.38829	0.0169271	0.0765907	2.63024	BLOOD_vs_HCC
PTGER4	1909.22	-1.00166	0.419899	-2.38547	0.0170572	0.0706737	2.92829	BLOOD_vs_HCC
TADA2B	550.738	4.8678	2.0411	2.38489	0.0170841	0.0708158	2.92032	BLOOD_vs_HCC
PHF20	1337.41	-1.10829	0.464832	-2.38428	0.0171126	0.0708158	2.92829	BLOOD_vs_HCC
P2RY14	116.29	-3.15445	1.32351	-2.38339	0.017154	0.928388	0.0503501	BLOOD_vs_HCC
TBCA	338.772	-2.20396	0.924759	-2.38327	0.0171594	0.306816	0.332526	BLOOD_vs_HCC
ZBTB7A	112.408	-3.35621	1.40831	-2.38314	0.0171655	0.499758	0.149408	BLOOD_vs_HCC
TAF1C	172.104	5.64826	2.37162	2.3816	0.0172374	0.391187	0.22353	BLOOD_vs_HCC
LMO4	1120.94	-1.3225	0.555465	-2.38089	0.0172709	0.0714357	2.91363	BLOOD_vs_HCC
SEPHS2	537.265	2.16103	0.908387	2.37898	0.0173607	0.0694129	3.0626	BLOOD_vs_HCC
SFPQ	1607.04	-1.05913	0.44533	-2.37831	0.0173922	0.0714883	2.92829	BLOOD_vs_HCC
ANKRD28	1141.63	-1.20983	0.509021	-2.37679	0.017464	0.0714357	2.9475	BLOOD_vs_HCC
PSME3	842.797	2.06555	0.870782	2.37206	0.0176891	0.0729091	2.91363	BLOOD_vs_HCC
RARA	297.45	-2.3299	0.983672	-2.36857	0.017857	0.19621	0.700022	BLOOD_vs_HCC
RGL2	333.074	3.10427	1.31282	2.36458	0.0180506	0.200829	0.686119	BLOOD_vs_HCC
TM9SF1	83.1582	-3.78476	1.60083	-2.36425	0.0180665	0.761376	0.0767671	BLOOD_vs_HCC
ZNF559	651.33	2.45603	1.03942	2.36288	0.0181336	0.0714357	3.0626	BLOOD_vs_HCC
PSMD10	444.779	2.92891	1.23979	2.36242	0.0181558	0.0714357	3.0626	BLOOD_vs_HCC
BBC3	89.0383	-4.89752	2.07388	-2.36153	0.0181999	0.520469	0.149408	BLOOD_vs_HCC
SEC61A1	1307.17	1.24128	0.525738	2.36103	0.0182245	0.0798688	2.63024	BLOOD_vs_HCC
LTB4R	174.131	5.66748	2.40349	2.35802	0.0183728	0.399942	0.231046	BLOOD_vs_HCC
LEF1	947.922	1.61153	0.683481	2.35783	0.0183821	0.0802871	2.63024	BLOOD_vs_HCC
ZNF652	697.492	2.11823	0.898566	2.35735	0.018406	0.0754361	2.91363	BLOOD_vs_HCC
BCL7C	74.5799	-3.91009	1.65891	-2.35702	0.0184222	0.373844	0.260864	BLOOD_vs_HCC
HIGD1A	174.305	5.66641	2.40498	2.35612	0.0184671	0.523858	0.149408	BLOOD_vs_HCC
GRK5	400.15	-2.20171	0.935066	-2.3546	0.0185425	0.070397	3.20681	BLOOD_vs_HCC
SF3A3	674.345	1.8821	0.799786	2.35326	0.0186098	0.0809307	2.63024	BLOOD_vs_HCC
PDHA1	673.191	2.50658	1.06562	2.35224	0.0186608	0.0755166	2.9475	BLOOD_vs_HCC
NONO	1318.04	1.25456	0.533423	2.35191	0.0186771	0.080863	2.64633	BLOOD_vs_HCC
NCAPG2	175.83	5.68029	2.41773	2.34943	0.0188024	0.530045	0.149408	BLOOD_vs_HCC
BCR	178.351	5.69955	2.42604	2.34933	0.0188075	0.404417	0.231046	BLOOD_vs_HCC
ESD	509.873	2.36022	1.00505	2.34836	0.0188563	0.0738556	3.0626	BLOOD_vs_HCC
IL4I1	290.952	-2.2854	0.973294	-2.3481	0.0188692	0.206739	0.686119	BLOOD_vs_HCC
UPF3A	163.834	-2.68979	1.14622	-2.34665	0.0189429	0.415947	0.22353	BLOOD_vs_HCC
ANAPC4	424.238	2.85756	1.21832	2.34549	0.019002	0.0742809	3.06512	BLOOD_vs_HCC
SF3B5	666.56	-1.49754	0.638878	-2.34402	0.0190772	0.0766996	2.9475	BLOOD_vs_HCC
RCAN3	994.512	1.91418	0.816735	2.3437	0.0190936	0.0819106	2.64633	BLOOD_vs_HCC
GSTP1	701.261	-1.45989	0.622908	-2.34367	0.0190952	0.0766996	2.9475	BLOOD_vs_HCC
HCLS1	2496.57	1.01156	0.43164	2.34352	0.0191025	0.0766996	2.9475	BLOOD_vs_HCC
RPN2	2889.44	1.06231	0.453876	2.34053	0.0192562	0.0826703	2.63024	BLOOD_vs_HCC
CPSF1	365.397	2.6325	1.12543	2.33909	0.0193305	0.0724723	3.20681	BLOOD_vs_HCC
SSR1	1333.24	1.2115	0.517984	2.33888	0.0193416	0.078039	2.91363	BLOOD_vs_HCC
M6PR	1319.51	1.25668	0.5374	2.33844	0.0193647	0.0827372	2.63024	BLOOD_vs_HCC
SPTBN1	1439.94	1.33758	0.572219	2.33754	0.0194113	0.0776153	2.9475	BLOOD_vs_HCC
SAMSN1	901.403	-1.32357	0.566252	-2.33743	0.019417	0.0776153	2.9475	BLOOD_vs_HCC
CASP4	1045.57	1.56907	0.671563	2.33644	0.0194684	0.0780704	2.92829	BLOOD_vs_HCC
ERBIN	830.631	1.89379	0.810708	2.33597	0.019493	0.0827372	2.64633	BLOOD_vs_HCC
SNHG9	65.7881	-4.08392	1.74884	-2.33522	0.0195318	0.642684	0.110809	BLOOD_vs_HCC
USP49	195.649	5.83319	2.4986	2.33458	0.0195653	0.542266	0.149408	BLOOD_vs_HCC
RAB37	816.461	1.60179	0.686139	2.3345	0.0195697	0.0833061	2.63024	BLOOD_vs_HCC
IARS2	772.574	2.48142	1.06352	2.33322	0.0196366	0.0835025	2.63024	BLOOD_vs_HCC
GANAB	1225.12	1.33626	0.572888	2.3325	0.0196743	0.078548	2.92829	BLOOD_vs_HCC
GOT2	484.091	2.28069	0.978762	2.33017	0.019797	0.0766996	3.0626	BLOOD_vs_HCC
SPOCK2	2257.16	-1.04488	0.44843	-2.33008	0.019802	0.0837264	2.63024	BLOOD_vs_HCC
CLTC	1138.49	1.61291	0.692614	2.32872	0.0198737	0.078993	2.92829	BLOOD_vs_HCC
CCDC86	267.034	-2.19829	0.944108	-2.32843	0.0198892	0.337705	0.332526	BLOOD_vs_HCC
ZBTB48	156.312	5.50977	2.36651	2.32823	0.0198999	0.547657	0.149408	BLOOD_vs_HCC
EIF3A	2035.08	1.02875	0.442372	2.32553	0.0200435	0.084093	2.64633	BLOOD_vs_HCC
UBP1	434.319	2.893	1.24525	2.32322	0.0201674	0.079855	2.92032	BLOOD_vs_HCC
MED17	196.309	-2.5698	1.10637	-2.32274	0.0201932	0.424453	0.231046	BLOOD_vs_HCC
TUBB4B	736.252	-1.57419	0.677879	-2.32223	0.0202208	0.0846383	2.64633	BLOOD_vs_HCC
IDH1	163.366	5.5732	2.40016	2.32201	0.0202323	0.424886	0.231046	BLOOD_vs_HCC
SPG11	808.719	1.58689	0.683465	2.32183	0.0202418	0.0846383	2.64633	BLOOD_vs_HCC
BCS1L	304.73	4.00115	1.72335	2.32173	0.0202474	0.342206	0.332526	BLOOD_vs_HCC
HAT1	471.841	2.5829	1.11255	2.32161	0.0202538	0.0777671	3.06512	BLOOD_vs_HCC
CCND3	2005.53	1.0784	0.464525	2.32151	0.0202592	0.0795658	2.9475	BLOOD_vs_HCC
AKAP13	3230.06	-0.965539	0.416029	-2.32085	0.020295	0.0848685	2.63024	BLOOD_vs_HCC
GRSF1	734.586	1.85168	0.798269	2.31962	0.0203613	0.0800536	2.92829	BLOOD_vs_HCC
TOR1A	746.055	2.03986	0.879597	2.31908	0.0203907	0.080082	2.92829	BLOOD_vs_HCC
SEC14L1	486.852	-1.71959	0.741848	-2.31798	0.0204505	0.0783113	3.0626	BLOOD_vs_HCC
CHMP1B	561.145	-1.57507	0.679724	-2.31721	0.020492	0.0783113	3.0626	BLOOD_vs_HCC
NF2	155.812	5.50691	2.37781	2.31596	0.0205606	0.428639	0.231046	BLOOD_vs_HCC
AARSD1	38.9379	-6.04292	2.60946	-2.31577	0.0205707	0.696803	0.10137	BLOOD_vs_HCC
SND1-IT1	159.161	5.5355	2.39054	2.31558	0.0205811	0.428715	0.231046	BLOOD_vs_HCC
RBM34	50.8225	-7.02474	3.03415	-2.31523	0.0206005	0.529722	0.164052	BLOOD_vs_HCC
KRCC1	531.021	2.14158	0.925161	2.31482	0.0206227	0.080863	2.92032	BLOOD_vs_HCC
ANKH	551.48	1.96129	0.847473	2.31428	0.0206526	0.0786859	3.06512	BLOOD_vs_HCC
C1orf43	921.688	1.46289	0.632229	2.31387	0.0206748	0.080863	2.92829	BLOOD_vs_HCC
PLAGL2	162.188	5.56251	2.40405	2.31381	0.0206784	0.429263	0.230759	BLOOD_vs_HCC
ATG16L2	553.702	1.96697	0.850534	2.31263	0.0207432	0.0766996	3.20681	BLOOD_vs_HCC
SENP5	432.76	2.45116	1.06009	2.31221	0.020766	0.078993	3.06512	BLOOD_vs_HCC
ICOS	369.404	-2.20388	0.953587	-2.31115	0.0208246	0.078993	3.06512	BLOOD_vs_HCC
LSM12	95.3423	-3.43043	1.48628	-2.30807	0.0209954	0.563584	0.149408	BLOOD_vs_HCC
DPH7	542.56	2.17482	0.942725	2.30695	0.0210575	0.0775387	3.20681	BLOOD_vs_HCC
TTC3	1723.41	1.07013	0.464004	2.30629	0.0210942	0.0815966	2.9475	BLOOD_vs_HCC
ELOC	276.364	-2.2144	0.960844	-2.30464	0.0211869	0.219839	0.700022	BLOOD_vs_HCC
ATP6V1C1	314.307	4.04751	1.75762	2.30284	0.021288	0.218826	0.709168	BLOOD_vs_HCC
CD53	5481.99	0.961095	0.417543	2.30178	0.0213473	0.0825839	2.92829	BLOOD_vs_HCC
CASP8AP2	437.159	3.51083	1.52535	2.30166	0.0213544	0.0826703	2.92032	BLOOD_vs_HCC
ELP5	336.544	3.11928	1.35561	2.30102	0.0213904	0.221062	0.700022	BLOOD_vs_HCC
EPAS1	156.873	-4.93313	2.14431	-2.30057	0.021416	0.418582	0.250299	BLOOD_vs_HCC
MTRNR2L12	3852.02	-0.853364	0.37094	-2.30055	0.0214174	0.0826703	2.92829	BLOOD_vs_HCC
CNTRL	1077.24	1.35408	0.5892	2.29817	0.0215523	0.0827372	2.92829	BLOOD_vs_HCC
BCAS2	417.009	-1.88135	0.818797	-2.2977	0.021579	0.0791684	3.16329	BLOOD_vs_HCC
FAM193B	305.932	4.00597	1.74353	2.29762	0.0215835	0.225133	0.686119	BLOOD_vs_HCC
ING4	477.23	2.2596	0.983652	2.29715	0.0216102	0.0791684	3.16329	BLOOD_vs_HCC
RAB10	764.988	1.76426	0.768428	2.29594	0.0216793	0.0827372	2.9475	BLOOD_vs_HCC
LUC7L3	1937.51	1.59399	0.694582	2.29489	0.0217394	0.0832588	2.92829	BLOOD_vs_HCC
ATG4B	421.746	2.41175	1.05215	2.2922	0.0218938	0.0791684	3.20681	BLOOD_vs_HCC
TNFSF14	492.904	-1.60961	0.702352	-2.29174	0.0219206	0.0798688	3.16329	BLOOD_vs_HCC
CLPP	329.761	-1.96288	0.856987	-2.29045	0.0219953	0.228656	0.686119	BLOOD_vs_HCC
TSTD1	604.789	-1.54607	0.675254	-2.28962	0.0220435	0.0817997	3.0626	BLOOD_vs_HCC
HEXIM1	183.324	-2.6552	1.15977	-2.28943	0.0220547	0.581629	0.149408	BLOOD_vs_HCC
STAT5A	827.757	2.03744	0.889965	2.28935	0.0220593	0.0837264	2.92829	BLOOD_vs_HCC
HNRNPF	1767.62	1.06923	0.467237	2.28841	0.0221134	0.0836953	2.9475	BLOOD_vs_HCC
TUBGCP3	336.464	3.12055	1.36468	2.28666	0.0222159	0.36271	0.332526	BLOOD_vs_HCC
GRASP	242.564	-3.12105	1.36495	-2.28656	0.0222215	0.230386	0.686119	BLOOD_vs_HCC
FLI1	1401.65	1.35496	0.59264	2.28632	0.0222358	0.0913769	2.63024	BLOOD_vs_HCC
SEC31A	1451.3	1.23342	0.539484	2.28629	0.0222372	0.0913769	2.63024	BLOOD_vs_HCC
PIK3CD	461.911	2.20866	0.966414	2.28542	0.0222885	0.082464	3.06512	BLOOD_vs_HCC
DDX39A	959.082	1.4297	0.625997	2.28388	0.0223787	0.0917713	2.63024	BLOOD_vs_HCC
USF1	365.056	2.63043	1.15174	2.28387	0.0223789	0.0846383	2.92032	BLOOD_vs_HCC
SNX2	609.209	1.90771	0.836075	2.28174	0.0225046	0.0827372	3.0626	BLOOD_vs_HCC
PSMD2	1148.97	1.30347	0.57195	2.27899	0.0226675	0.0926723	2.63024	BLOOD_vs_HCC
SUN1	491.505	2.02178	0.887346	2.27846	0.0226993	0.0817277	3.16329	BLOOD_vs_HCC
ETV3	171.361	-2.72901	1.19901	-2.27604	0.0228433	0.433877	0.250299	BLOOD_vs_HCC
RELT	123.668	-5.96438	2.62158	-2.27511	0.0228994	0.425146	0.260864	BLOOD_vs_HCC
RACK1	11139.2	-0.781395	0.343549	-2.27448	0.0229371	0.0931127	2.63024	BLOOD_vs_HCC
CSTB	850.792	-1.56666	0.688843	-2.27433	0.0229463	0.086099	2.92829	BLOOD_vs_HCC
FBXW2	480.768	2.26974	0.998659	2.27279	0.0230389	0.0817366	3.20681	BLOOD_vs_HCC
ATXN10	877.19	1.59869	0.703959	2.27101	0.0231466	0.0869273	2.91363	BLOOD_vs_HCC
NUAK2	164.583	5.58344	2.45933	2.27031	0.0231888	0.457996	0.230759	BLOOD_vs_HCC
TLE3	131.788	-3.59349	1.58354	-2.26928	0.0232511	0.598449	0.149408	BLOOD_vs_HCC
EIF4G2	4380.41	0.759224	0.334581	2.26918	0.0232573	0.0935555	2.64633	BLOOD_vs_HCC
NDUFAF3	383.904	-1.78197	0.785424	-2.2688	0.0232804	0.0843092	3.0626	BLOOD_vs_HCC
SNX17	911.533	1.44556	0.637515	2.26749	0.0233605	0.0875496	2.91363	BLOOD_vs_HCC
GEMIN4	273.397	3.84109	1.69455	2.26672	0.0234071	0.234734	0.700022	BLOOD_vs_HCC
IRF2BP2	763.89	-1.79942	0.794049	-2.26613	0.0234435	0.0875109	2.92829	BLOOD_vs_HCC
WDR83OS	656.499	-1.54081	0.680196	-2.26525	0.0234976	0.0832588	3.16329	BLOOD_vs_HCC
CALR	1502.85	-1.08048	0.476984	-2.26523	0.0234987	0.0879768	2.91363	BLOOD_vs_HCC
NUP58	246.925	-2.50826	1.10747	-2.26486	0.0235215	0.239206	0.686119	BLOOD_vs_HCC
ZNF792	149.279	5.4449	2.40447	2.26449	0.0235442	0.462429	0.230759	BLOOD_vs_HCC
HIST1H4C	634.083	-1.69813	0.74991	-2.26445	0.0235466	0.0847407	3.0626	BLOOD_vs_HCC
MED12	266.737	3.80496	1.68262	2.26133	0.0237386	0.24078	0.686119	BLOOD_vs_HCC
GABPB2	363.454	2.62487	1.16089	2.26108	0.0237546	0.0836953	3.16329	BLOOD_vs_HCC
RIOX2	158.464	5.53135	2.44681	2.26064	0.0237818	0.464528	0.231046	BLOOD_vs_HCC
PPP1R15B	368.471	-2.0133	0.891884	-2.25736	0.0239857	0.0835696	3.20681	BLOOD_vs_HCC
ALDH9A1	764.387	2.07748	0.920883	2.25596	0.024073	0.095969	2.64633	BLOOD_vs_HCC
ACVR2A	369.173	4.28215	1.89822	2.25588	0.0240781	0.0862891	3.0626	BLOOD_vs_HCC
MAP4K1	400.49	2.33313	1.03439	2.25557	0.0240978	0.0836953	3.20681	BLOOD_vs_HCC
LSM1	169.914	-2.76812	1.22814	-2.25391	0.024202	0.48004	0.22353	BLOOD_vs_HCC
EFTUD2	768.011	1.92033	0.85246	2.2527	0.0242783	0.0896665	2.9475	BLOOD_vs_HCC
XRCC5	1793.63	1.22667	0.54562	2.24822	0.0245623	0.0913769	2.91363	BLOOD_vs_HCC
NUP54	569.705	1.80193	0.801531	2.24811	0.0245692	0.0846383	3.20681	BLOOD_vs_HCC
ARFGAP2	710.713	1.64745	0.73307	2.24733	0.0246192	0.0906462	2.9475	BLOOD_vs_HCC
MYO15B	311.086	3.00141	1.33619	2.24626	0.0246876	0.382578	0.332526	BLOOD_vs_HCC
ARHGEF3	849.006	1.54614	0.68837	2.24609	0.0246982	0.0982404	2.64633	BLOOD_vs_HCC
NOP2	105.643	-3.2798	1.46065	-2.24544	0.0247399	0.486438	0.22353	BLOOD_vs_HCC
NDUFA2	303.978	-2.00668	0.893738	-2.24526	0.0247512	0.382947	0.332526	BLOOD_vs_HCC
NIPAL3	471.718	2.24072	0.998057	2.24508	0.0247627	0.0915538	2.92032	BLOOD_vs_HCC
ZNF844	40.4393	-5.12874	2.28477	-2.24475	0.0247841	0.743496	0.10938	BLOOD_vs_HCC
FAM160B1	301.392	3.98588	1.77705	2.24298	0.024898	0.244471	0.700022	BLOOD_vs_HCC
SNHG5	640.194	-1.61338	0.719379	-2.24274	0.0249133	0.0885719	3.06512	BLOOD_vs_HCC
EGR1	38.4465	-6.54369	2.91894	-2.2418	0.0249744	0.784593	0.100163	BLOOD_vs_HCC
CTSZ	122.473	-4.99125	2.22793	-2.2403	0.0250713	0.905158	0.0767671	BLOOD_vs_HCC
COASY	392.356	2.30143	1.0276	2.23962	0.0251157	0.0869273	3.16329	BLOOD_vs_HCC
ZNF558	144.188	5.39297	2.40869	2.23896	0.0251583	0.482366	0.230759	BLOOD_vs_HCC
SASH3	788.335	1.67463	0.748166	2.23831	0.0252009	0.0927639	2.91363	BLOOD_vs_HCC
TBC1D4	146.295	5.41579	2.42162	2.23643	0.0253234	0.484053	0.231046	BLOOD_vs_HCC
SLC18B1	160.422	5.54777	2.48273	2.23455	0.025447	0.461574	0.250299	BLOOD_vs_HCC
BUB3	1166.66	1.40386	0.628523	2.23359	0.0255104	0.0927639	2.9475	BLOOD_vs_HCC
RAD21	1167.49	-1.09026	0.488375	-2.23242	0.0255874	0.0935555	2.91363	BLOOD_vs_HCC
TRAF5	759.465	1.75246	0.785582	2.23078	0.0256958	0.101747	2.63024	BLOOD_vs_HCC
FERMT2	45.8479	-5.76433	2.58745	-2.2278	0.0258938	0.793434	0.10137	BLOOD_vs_HCC
RBMS1	973.594	-2.05388	0.92222	-2.2271	0.0259404	0.102314	2.63024	BLOOD_vs_HCC
SNU13	969.867	-1.36059	0.611173	-2.2262	0.0260009	0.102086	2.64633	BLOOD_vs_HCC
SFI1	407.932	2.79828	1.2582	2.22403	0.0261463	0.0898856	3.16329	BLOOD_vs_HCC
CST7	92.1217	-5.65455	2.54323	-2.22338	0.0261905	1	0.0503501	BLOOD_vs_HCC
SAR1B	433.447	-1.9257	0.866192	-2.22318	0.0262033	0.0899893	3.16329	BLOOD_vs_HCC
EIF2S2	451.194	-1.72082	0.774406	-2.22211	0.0262757	0.0924462	3.0626	BLOOD_vs_HCC
STAT2	730.632	1.691	0.761117	2.22173	0.0263013	0.0946099	2.9475	BLOOD_vs_HCC
RNF34	608.437	2.35148	1.05999	2.21841	0.026527	0.0927639	3.0626	BLOOD_vs_HCC
KIAA0586	294.42	2.91925	1.31635	2.21768	0.0265764	0.401015	0.332526	BLOOD_vs_HCC
ZBTB26	141.821	5.36943	2.42126	2.21762	0.0265809	0.646673	0.149408	BLOOD_vs_HCC
ATG2A	124.802	-3.14293	1.41876	-2.21526	0.026742	0.647856	0.149408	BLOOD_vs_HCC
BTG3	281.193	-2.28527	1.03168	-2.2151	0.0267532	0.257451	0.700022	BLOOD_vs_HCC
CPSF6	666.433	1.86288	0.840997	2.21509	0.026754	0.104268	2.64633	BLOOD_vs_HCC
TOP1	396.007	-2.33628	1.05488	-2.21473	0.0267785	0.0932661	3.0626	BLOOD_vs_HCC
ZNF449	225.051	6.03525	2.72901	2.21152	0.0270001	0.404211	0.332526	BLOOD_vs_HCC
SC5D	379.682	-3.59925	1.62776	-2.21117	0.0270239	0.0937433	3.0626	BLOOD_vs_HCC
CCNG2	373.299	-1.87013	0.846165	-2.21013	0.0270965	0.0913769	3.20681	BLOOD_vs_HCC
CCSAP	278.056	3.86529	1.7502	2.20849	0.0272099	0.257706	0.709168	BLOOD_vs_HCC
TCF19	148.612	5.43627	2.4624	2.20771	0.0272646	0.520734	0.22353	BLOOD_vs_HCC
DMAP1	538.376	1.92267	0.870915	2.20764	0.0272693	0.0944998	3.0626	BLOOD_vs_HCC
NOL8	405.81	2.79241	1.26494	2.20755	0.0272755	0.0982404	2.92032	BLOOD_vs_HCC
DBNL	658.314	1.67758	0.760136	2.20695	0.0273175	0.0927639	3.16329	BLOOD_vs_HCC
ZNF267	202.75	-3.84176	1.74181	-2.20561	0.0274112	0.522696	0.22353	BLOOD_vs_HCC
ING3	295.384	2.92422	1.32609	2.20514	0.0274441	0.261154	0.700022	BLOOD_vs_HCC
MTRF1L	77.7442	-3.58287	1.62526	-2.20449	0.0274901	0.657732	0.149408	BLOOD_vs_HCC
ZNF706	347.663	-1.79386	0.813779	-2.20435	0.0274997	0.261203	0.700022	BLOOD_vs_HCC
NHLRC2	293.202	2.91318	1.32159	2.20431	0.0275025	0.408984	0.332526	BLOOD_vs_HCC
SLC4A4	141.348	5.36413	2.43381	2.204	0.027524	0.523365	0.22353	BLOOD_vs_HCC
TMEM189	146.838	-2.65185	1.20342	-2.20359	0.0275528	0.523365	0.22353	BLOOD_vs_HCC
RPA1	935.755	1.59073	0.721886	2.20357	0.0275546	0.10707	2.63024	BLOOD_vs_HCC
POLR2B	825.056	1.50017	0.681171	2.20234	0.0276415	0.106998	2.64633	BLOOD_vs_HCC
BMS1	611.986	1.72903	0.785265	2.20184	0.0276766	0.0957196	3.0626	BLOOD_vs_HCC
BUD31	323.099	-1.92046	0.872261	-2.2017	0.0276863	0.261988	0.700022	BLOOD_vs_HCC
STAT3	1271.17	-1.06368	0.483202	-2.20133	0.0277129	0.0996495	2.91363	BLOOD_vs_HCC
NBR1	843.726	1.78117	0.809415	2.20056	0.0277671	0.10707	2.64633	BLOOD_vs_HCC
CTDP1	123.914	-3.18117	1.44629	-2.19954	0.0278399	0.97419	0.0767671	BLOOD_vs_HCC
PLEKHA2	425.058	-1.65146	0.751148	-2.19858	0.0279076	0.0937433	3.16329	BLOOD_vs_HCC
BOD1L1	668.491	1.70229	0.774464	2.19802	0.0279474	0.0995348	2.9475	BLOOD_vs_HCC
NXPE3	160.212	5.54476	2.52349	2.19726	0.0280021	0.518676	0.231046	BLOOD_vs_HCC
TRPC4AP	700.861	1.62471	0.739637	2.19663	0.0280468	0.108288	2.63024	BLOOD_vs_HCC
ANXA5	1517.26	1.09302	0.497868	2.19541	0.0281342	0.108522	2.63024	BLOOD_vs_HCC
PTCD3	627.778	1.76983	0.806798	2.19364	0.0282611	0.0972547	3.0626	BLOOD_vs_HCC
ZFYVE26	310.447	4.0274	1.83632	2.19319	0.0282936	0.263265	0.709168	BLOOD_vs_HCC
CFAP44	132.184	5.26845	2.40327	2.1922	0.0283652	0.532155	0.22353	BLOOD_vs_HCC
MARCKSL1	283.276	-2.25526	1.02888	-2.19195	0.028383	0.418172	0.332526	BLOOD_vs_HCC
NBEAL2	339.661	2.5212	1.15119	2.19008	0.0285183	0.2699	0.686119	BLOOD_vs_HCC
MYBL1	199.433	-2.70721	1.23637	-2.18965	0.0285497	0.523858	0.231046	BLOOD_vs_HCC
DSTYK	295.112	2.92208	1.3346	2.18948	0.0285621	0.266937	0.700022	BLOOD_vs_HCC
CPD	430.674	-1.69799	0.775561	-2.18937	0.0285697	0.10179	2.92032	BLOOD_vs_HCC
GTF2A2	415.866	-1.88959	0.863579	-2.18809	0.0286632	0.0958803	3.16329	BLOOD_vs_HCC
ADPRHL2	482.097	2.27415	1.03963	2.18746	0.028709	0.102086	2.92032	BLOOD_vs_HCC
S100A11	1352.92	-1.10761	0.506368	-2.18736	0.0287161	0.109777	2.64633	BLOOD_vs_HCC
PTOV1	302.263	-2.02609	0.926495	-2.18684	0.0287543	0.265761	0.709168	BLOOD_vs_HCC
MRPL34	218.231	-2.33102	1.06624	-2.1862	0.0288008	0.275432	0.672881	BLOOD_vs_HCC
MDM4	1026.7	1.3592	0.621752	2.18607	0.0288102	0.110032	2.64633	BLOOD_vs_HCC
TCEANC	208.315	5.92413	2.71563	2.18149	0.0291471	0.530816	0.230759	BLOOD_vs_HCC
ADPGK	641.729	1.63674	0.750351	2.1813	0.029161	0.095969	3.20681	BLOOD_vs_HCC
GGPS1	135.256	5.30069	2.43116	2.18031	0.0292342	0.531196	0.231046	BLOOD_vs_HCC
XPO7	366.943	2.63979	1.21147	2.179	0.0293314	0.103776	2.92032	BLOOD_vs_HCC
NDUFB6	368.218	-1.81751	0.834209	-2.17873	0.0293521	0.10031	3.0626	BLOOD_vs_HCC
HDAC1	990.712	1.30121	0.597664	2.17717	0.029468	0.103413	2.9475	BLOOD_vs_HCC
DUSP7	127.709	5.21884	2.39813	2.17621	0.0295393	1	0.0503501	BLOOD_vs_HCC
IST1	1129.65	1.27553	0.58622	2.17586	0.029566	0.111325	2.64633	BLOOD_vs_HCC
NOL11	288.456	2.88877	1.32771	2.17575	0.0295737	0.42858	0.332526	BLOOD_vs_HCC
MFSD14B	131.721	5.26412	2.41982	2.17542	0.0295989	0.54551	0.22353	BLOOD_vs_HCC
DCP1B	137.298	5.32216	2.45091	2.1715	0.0298933	0.692195	0.149408	BLOOD_vs_HCC
NELFE	432.024	2.10521	0.970137	2.17001	0.0300061	0.105559	2.92032	BLOOD_vs_HCC
FAM192A	539.559	1.92617	0.887772	2.16966	0.0300323	0.0995648	3.16329	BLOOD_vs_HCC
ZNF580	102.861	-3.46451	1.59768	-2.16846	0.0301236	0.550063	0.22353	BLOOD_vs_HCC
EDF1	1202.69	-1.3234	0.610577	-2.16746	0.0302001	0.11318	2.64633	BLOOD_vs_HCC
USP10	474.203	1.96586	0.907896	2.16529	0.0303656	0.100372	3.16329	BLOOD_vs_HCC
RAB4B	39.2397	-5.80277	2.68344	-2.16244	0.0305842	0.825607	0.110809	BLOOD_vs_HCC
ZNF234	350.717	4.2072	1.94689	2.16098	0.0306966	0.277361	0.709168	BLOOD_vs_HCC
SEM1	301.963	-2.02744	0.938459	-2.16039	0.0307423	0.283673	0.686119	BLOOD_vs_HCC
TROAP	38.0892	-7.05218	3.26582	-2.15939	0.0308199	0.829031	0.110809	BLOOD_vs_HCC
STK10	928.61	1.47512	0.683331	2.15872	0.0308717	0.10707	2.9475	BLOOD_vs_HCC
TBC1D9B	510.966	2.08169	0.964538	2.15823	0.03091	0.100586	3.20681	BLOOD_vs_HCC
EPB41	780.564	1.79564	0.832234	2.15762	0.0309575	0.108153	2.91363	BLOOD_vs_HCC
OSGIN2	159.551	5.53852	2.56884	2.15604	0.0310808	0.525263	0.250299	BLOOD_vs_HCC
TAX1BP1	1286.85	1.1527	0.53497	2.15469	0.0311858	0.108256	2.92829	BLOOD_vs_HCC
ANXA7	1343.58	1.10588	0.513599	2.15321	0.0313025	0.108153	2.9475	BLOOD_vs_HCC
CDK11B	172.928	-2.45573	1.14066	-2.1529	0.0313269	0.562924	0.22353	BLOOD_vs_HCC
EPSTI1	210.655	-2.47031	1.14821	-2.15145	0.0314411	0.529722	0.250299	BLOOD_vs_HCC
BRAP	437.796	2.12502	0.987768	2.15133	0.0314498	0.105559	3.0626	BLOOD_vs_HCC
ARG2	102.812	-4.86918	2.26353	-2.15114	0.0314651	1	0.0767671	BLOOD_vs_HCC
PITRM1	335.995	2.50495	1.16531	2.14959	0.0315876	0.288509	0.686119	BLOOD_vs_HCC
SNAPIN	344.033	2.54035	1.18189	2.1494	0.0316027	0.288509	0.686119	BLOOD_vs_HCC
GORASP1	139.362	5.34403	2.48653	2.14919	0.0316192	0.530816	0.250299	BLOOD_vs_HCC
IL10RB	67.8956	-4.99923	2.32655	-2.14878	0.0316522	0.890674	0.100163	BLOOD_vs_HCC
CALCOCO2	1195.22	1.52179	0.708229	2.14873	0.0316558	0.117393	2.64633	BLOOD_vs_HCC
NUP210	652.642	1.66301	0.774545	2.14708	0.0317872	0.102732	3.20681	BLOOD_vs_HCC
RGS14	511.38	1.84271	0.858298	2.14693	0.0317985	0.103776	3.16329	BLOOD_vs_HCC
ULK1	145.652	5.40804	2.5195	2.14647	0.0318352	0.557458	0.230759	BLOOD_vs_HCC
PAPOLG	395.488	2.31285	1.07761	2.14628	0.0318508	0.106637	3.0626	BLOOD_vs_HCC
LINC01126	38.8072	-6.16214	2.87174	-2.14578	0.0318903	0.846651	0.110809	BLOOD_vs_HCC
MRPL52	206.538	-2.36357	1.10151	-2.14576	0.031892	0.5331	0.250299	BLOOD_vs_HCC
DCXR	321.122	-1.9379	0.903462	-2.14497	0.0319553	0.284602	0.709168	BLOOD_vs_HCC
ZNF783	277.477	3.86207	1.80103	2.14437	0.0320029	0.291229	0.686119	BLOOD_vs_HCC
CTBS	228.577	-2.15699	1.00664	-2.14276	0.0321326	0.447346	0.332526	BLOOD_vs_HCC
IFITM3	327.817	-2.20802	1.03161	-2.14036	0.0323253	0.44846	0.332526	BLOOD_vs_HCC
ELMO2	905.75	1.53906	0.719421	2.1393	0.0324111	0.111051	2.91363	BLOOD_vs_HCC
CD48	2278.63	-0.989193	0.462474	-2.13891	0.0324426	0.110916	2.92829	BLOOD_vs_HCC
STK25	417.02	2.04989	0.958538	2.13856	0.032471	0.105559	3.16329	BLOOD_vs_HCC
EPRS	985.352	1.3799	0.645997	2.13608	0.0326732	0.12049	2.63024	BLOOD_vs_HCC
MRPS6	549.868	-1.50423	0.704853	-2.1341	0.0328345	0.105497	3.20681	BLOOD_vs_HCC
ISCA1	344.485	-2.70568	1.26789	-2.134	0.0328424	0.291677	0.700022	BLOOD_vs_HCC
RASSF2	426.279	2.42761	1.13808	2.13308	0.0329184	0.112213	2.92032	BLOOD_vs_HCC
TTC32	144.008	5.39064	2.52768	2.13264	0.0329542	0.543378	0.250299	BLOOD_vs_HCC
C1orf122	90.8934	-3.18485	1.49339	-2.13263	0.0329551	1	0.0503501	BLOOD_vs_HCC
GIT2	652.13	1.66212	0.779514	2.13225	0.0329862	0.10917	3.0626	BLOOD_vs_HCC
DNAJC10	589.695	1.85594	0.870434	2.1322	0.0329906	0.105588	3.20681	BLOOD_vs_HCC
CLK3	697.237	1.76882	0.829618	2.13209	0.0329995	0.121139	2.63024	BLOOD_vs_HCC
VPS11	283.351	3.89468	1.82725	2.13144	0.0330526	0.298744	0.672881	BLOOD_vs_HCC
CRKL	707.68	1.64063	0.769982	2.13073	0.0331112	0.121139	2.64633	BLOOD_vs_HCC
TRPV2	782.846	1.53491	0.720611	2.13001	0.0331712	0.121139	2.64633	BLOOD_vs_HCC
NOTCH2	966.119	1.34822	0.633293	2.12891	0.0332617	0.112233	2.9475	BLOOD_vs_HCC
NCOA5	263.161	3.78602	1.77855	2.12871	0.0332784	0.292922	0.700022	BLOOD_vs_HCC
MAP2K1	305.854	-2.47613	1.16382	-2.12758	0.0333715	0.296589	0.686119	BLOOD_vs_HCC
WDR77	281.823	2.85277	1.34116	2.12709	0.0334127	0.293422	0.700022	BLOOD_vs_HCC
COPS7A	390.92	2.2948	1.07933	2.12612	0.0334929	0.11016	3.06512	BLOOD_vs_HCC
TRA2B	835.491	-1.18619	0.558491	-2.12392	0.0336771	0.121879	2.64633	BLOOD_vs_HCC
SEC23A	450.462	2.16901	1.02127	2.12383	0.0336841	0.110647	3.06512	BLOOD_vs_HCC
RAC2	2469.22	-0.801025	0.377202	-2.1236	0.0337037	0.114082	2.91363	BLOOD_vs_HCC
NOP10	427.198	-1.63814	0.771476	-2.12339	0.0337216	0.114079	2.92032	BLOOD_vs_HCC
SPCS3	526.822	-1.48923	0.701463	-2.12304	0.0337504	0.110704	3.0626	BLOOD_vs_HCC
GCN1	570.795	1.80447	0.84997	2.12298	0.0337556	0.110704	3.0626	BLOOD_vs_HCC
ETFB	192.198	-2.25567	1.06271	-2.12257	0.0337897	0.578249	0.231046	BLOOD_vs_HCC
RBBP7	1200.48	1.16506	0.549049	2.12196	0.033841	0.114079	2.92829	BLOOD_vs_HCC
S100PBP	328.263	3.08148	1.45226	2.12185	0.0338501	0.299207	0.686119	BLOOD_vs_HCC
NAGK	492.097	2.30556	1.08689	2.12124	0.0339017	0.110835	3.06512	BLOOD_vs_HCC
NUP205	447.468	2.93787	1.38577	2.12003	0.0340038	0.110924	3.06512	BLOOD_vs_HCC
SEC23IP	439.43	2.13085	1.00557	2.11904	0.0340868	0.108153	3.20681	BLOOD_vs_HCC
RIOK3	575.335	-1.44133	0.68028	-2.11873	0.0341137	0.111094	3.0626	BLOOD_vs_HCC
NFYA	260.79	3.7713	1.78042	2.11821	0.0341575	0.464175	0.332526	BLOOD_vs_HCC
TXNDC12	823.096	1.87927	0.887338	2.11787	0.0341861	0.114279	2.9475	BLOOD_vs_HCC
ZC3HAV1	2616.38	-0.878779	0.415081	-2.11713	0.0342492	0.123828	2.63024	BLOOD_vs_HCC
RC3H1	472.186	-1.58425	0.748356	-2.11697	0.0342626	0.10968	3.16329	BLOOD_vs_HCC
ASH2L	267.974	3.81278	1.80217	2.11566	0.0343734	0.305006	0.672881	BLOOD_vs_HCC
QDPR	145.156	5.40493	2.55949	2.11172	0.0347106	0.58765	0.231046	BLOOD_vs_HCC
CRYBG3	173.906	5.66523	2.68505	2.10992	0.0348652	0.560564	0.250299	BLOOD_vs_HCC
MLLT6	589.509	1.66969	0.791748	2.10887	0.0349559	0.117393	2.92032	BLOOD_vs_HCC
SCRN1	443.866	2.14778	1.01851	2.10875	0.0349663	0.110835	3.16329	BLOOD_vs_HCC
SFT2D2	562.325	1.78084	0.84456	2.10861	0.0349786	0.110137	3.20681	BLOOD_vs_HCC
NHP2	232.249	-2.10268	0.997291	-2.10839	0.0349975	0.299207	0.709168	BLOOD_vs_HCC
EIF1B	521.991	-1.58584	0.752404	-2.10769	0.0350575	0.11342	3.0626	BLOOD_vs_HCC
NSD2	323.492	2.44685	1.16184	2.10602	0.035203	0.302644	0.700022	BLOOD_vs_HCC
PPIP5K2	549.913	2.19548	1.04339	2.10419	0.0353619	0.114079	3.06512	BLOOD_vs_HCC
HAPLN3	338.64	2.51711	1.19639	2.10393	0.0353847	0.474175	0.332526	BLOOD_vs_HCC
SOAT1	894.383	1.41443	0.67243	2.10347	0.0354251	0.126598	2.64633	BLOOD_vs_HCC
SF1	1127.85	-1.11211	0.528747	-2.10328	0.0354409	0.126976	2.63024	BLOOD_vs_HCC
NDUFA4	858.446	-1.20361	0.57227	-2.10323	0.0354461	0.117833	2.9475	BLOOD_vs_HCC
TRAF4	190.096	-3.18976	1.51759	-2.10186	0.0355657	0.605131	0.22353	BLOOD_vs_HCC
NAT10	320.716	2.43315	1.1578	2.10152	0.035595	0.311111	0.672881	BLOOD_vs_HCC
KMT2D	275.015	2.81616	1.34092	2.10016	0.0357146	0.304985	0.700022	BLOOD_vs_HCC
PPP1R37	41.7953	-4.64822	2.2134	-2.10003	0.0357259	0.725666	0.164052	BLOOD_vs_HCC
TRIM32	165.954	5.59539	2.66473	2.0998	0.0357467	0.597089	0.230759	BLOOD_vs_HCC
UBASH3A	332.473	2.48879	1.18558	2.09923	0.0357969	0.303609	0.709168	BLOOD_vs_HCC
AMPD3	434.691	2.1138	1.00698	2.09914	0.0358049	0.112361	3.16329	BLOOD_vs_HCC
LMAN2L	181.184	5.72441	2.72767	2.09864	0.0358483	0.608192	0.22353	BLOOD_vs_HCC
HERPUD1	1077.32	-1.22636	0.584466	-2.09825	0.0358826	0.127437	2.64633	BLOOD_vs_HCC
CDC16	478.712	2.26293	1.0787	2.09784	0.0359196	0.119672	2.92032	BLOOD_vs_HCC
TRAPPC1	490.195	-1.47933	0.705358	-2.09728	0.0359689	0.119672	2.92032	BLOOD_vs_HCC
INTS14	297.917	3.96675	1.8915	2.09714	0.035981	0.31344	0.672881	BLOOD_vs_HCC
RASSF1	1411.97	1.36713	0.652384	2.09558	0.0361191	0.128196	2.63024	BLOOD_vs_HCC
NCSTN	738.743	1.70843	0.815306	2.09544	0.0361315	0.128196	2.63024	BLOOD_vs_HCC
GAB3	432.633	2.10643	1.00544	2.09503	0.0361685	0.116146	3.0626	BLOOD_vs_HCC
CUL4B	248.981	3.70194	1.76921	2.09242	0.0364008	0.311669	0.686119	BLOOD_vs_HCC
SLC25A25	172.69	-2.46326	1.17784	-2.09134	0.0364973	0.603478	0.230759	BLOOD_vs_HCC
PPP1R14B	60.6716	-3.76768	1.80167	-2.09121	0.0365088	0.977894	0.100163	BLOOD_vs_HCC
ERCC5	125.344	-2.76352	1.32255	-2.08954	0.0366593	0.778111	0.149408	BLOOD_vs_HCC
NUDT3	66.4362	-5.46671	2.61855	-2.08768	0.0368264	0.91359	0.110809	BLOOD_vs_HCC
UQCR10	506.357	-1.60283	0.768064	-2.08684	0.0369022	0.113913	3.20681	BLOOD_vs_HCC
FAM104A	235.139	3.61848	1.73429	2.08643	0.0369394	0.308568	0.709168	BLOOD_vs_HCC
MIS12	289.642	3.92546	1.88253	2.08521	0.0370506	0.308978	0.709168	BLOOD_vs_HCC
ETS1	3521.66	1.21855	0.584478	2.08485	0.0370829	0.130994	2.63024	BLOOD_vs_HCC
KDM3B	423.256	2.07295	0.994573	2.08426	0.0371361	0.118373	3.0626	BLOOD_vs_HCC
SMG8	267.481	3.80781	1.82828	2.08273	0.0372756	0.491251	0.332526	BLOOD_vs_HCC
ATG4C	122.476	5.15738	2.4769	2.08219	0.0373247	1	0.0767671	BLOOD_vs_HCC
SLF2	423.286	2.07292	0.996216	2.08079	0.0374528	0.122711	2.92032	BLOOD_vs_HCC
TXK	266.777	3.80397	1.82828	2.08063	0.037468	0.311111	0.709168	BLOOD_vs_HCC
ERCC3	366.696	2.19639	1.05588	2.08015	0.0375115	0.122792	2.92032	BLOOD_vs_HCC
OSGEP	589.092	2.06306	0.993026	2.07755	0.0377511	0.119672	3.0626	BLOOD_vs_HCC
TADA2A	114.732	5.06405	2.44044	2.07505	0.0379817	0.62885	0.22353	BLOOD_vs_HCC
ZDHHC16	329.661	2.47513	1.19318	2.0744	0.0380425	0.316622	0.700022	BLOOD_vs_HCC
MTO1	354.844	2.58682	1.24739	2.07379	0.0380991	0.117903	3.16329	BLOOD_vs_HCC
SERINC5	890.795	1.5129	0.729697	2.07333	0.0381415	0.123828	2.92829	BLOOD_vs_HCC
SETD2	1292.91	1.16037	0.559942	2.07231	0.0382367	0.123759	2.9475	BLOOD_vs_HCC
POLDIP3	659.826	1.52832	0.737653	2.07188	0.0382771	0.118343	3.16329	BLOOD_vs_HCC
POR	421.477	-1.59292	0.76897	-2.0715	0.0383119	0.118343	3.16329	BLOOD_vs_HCC
MRS2	454.994	2.52721	1.22081	2.0701	0.0384427	0.121139	3.06512	BLOOD_vs_HCC
PIK3R5	485.51	2.00212	0.967161	2.0701	0.0384432	0.121139	3.06512	BLOOD_vs_HCC
LMNB1	98.6597	-4.47364	2.16125	-2.06993	0.0384586	0.796908	0.149408	BLOOD_vs_HCC
PPP3R1	132.365	-3.57576	1.72794	-2.06938	0.0385107	1	0.0767671	BLOOD_vs_HCC
LITAF	451.827	2.17497	1.05148	2.06847	0.0385955	0.121248	3.06512	BLOOD_vs_HCC
TC2N	993.277	1.58285	0.766638	2.06467	0.0389545	0.126598	2.91363	BLOOD_vs_HCC
HERC3	459.652	1.91766	0.92893	2.06437	0.0389823	0.118561	3.20681	BLOOD_vs_HCC
PIK3AP1	547.209	1.94843	0.943958	2.0641	0.039008	0.121879	3.06512	BLOOD_vs_HCC
SCFD1	786.51	1.42262	0.689576	2.06303	0.0391094	0.126716	2.91363	BLOOD_vs_HCC
PRKAR2A	253.639	-1.9522	0.946355	-2.06286	0.0391257	0.323502	0.700022	BLOOD_vs_HCC
A1BG	68.6657	-4.82127	2.33932	-2.06097	0.0393059	0.967279	0.10938	BLOOD_vs_HCC
TMBIM4	277.524	-2.19467	1.06585	-2.05907	0.0394875	0.330548	0.686119	BLOOD_vs_HCC
ZFR	889.969	1.40685	0.683327	2.05882	0.0395111	0.137708	2.63024	BLOOD_vs_HCC
RAD17	262.505	3.78011	1.83626	2.05858	0.0395341	0.334399	0.672881	BLOOD_vs_HCC
SEC23B	496.113	2.03573	0.989486	2.05736	0.0396513	0.127487	2.92032	BLOOD_vs_HCC
WAPL	949.48	1.32039	0.642123	2.0563	0.0397541	0.138009	2.63024	BLOOD_vs_HCC
NCOA6	229.369	3.58116	1.74185	2.05595	0.0397874	0.513515	0.332526	BLOOD_vs_HCC
UBQLN2	723.976	1.67618	0.815301	2.0559	0.0397921	0.127487	2.92829	BLOOD_vs_HCC
MBOAT7	597.743	-1.51958	0.739318	-2.05538	0.039842	0.123828	3.0626	BLOOD_vs_HCC
ENOX2	250.768	3.71277	1.80736	2.05425	0.0399515	0.328892	0.700022	BLOOD_vs_HCC
ABCC1	461.717	-1.88434	0.917299	-2.05422	0.0399542	0.123828	3.06512	BLOOD_vs_HCC
YPEL5	1224.33	-1.0667	0.519297	-2.05412	0.0399639	0.138009	2.64633	BLOOD_vs_HCC
ORMDL3	206.001	-2.76391	1.34567	-2.05393	0.0399824	0.647856	0.22353	BLOOD_vs_HCC
CCR9	125.275	5.18974	2.52789	2.05299	0.0400733	0.594487	0.260864	BLOOD_vs_HCC
BEX3	128.066	5.22252	2.54396	2.05291	0.0400813	1	0.0767671	BLOOD_vs_HCC
APOBEC3C	545.01	1.73238	0.844049	2.05246	0.0401252	0.12181	3.16329	BLOOD_vs_HCC
KMT5C	119.106	-3.42587	1.67014	-2.05125	0.0402424	0.596126	0.260864	BLOOD_vs_HCC
UBALD2	80.2741	-3.36165	1.63923	-2.05075	0.0402912	0.596414	0.260864	BLOOD_vs_HCC
AP001816.1	46.8435	-5.26193	2.56606	-2.05059	0.0403071	0.986551	0.10938	BLOOD_vs_HCC
VPS8	441.35	2.13725	1.0423	2.05052	0.0403139	0.12116	3.20681	BLOOD_vs_HCC
BTN3A3	585.393	1.84566	0.900368	2.04989	0.040375	0.128682	2.92032	BLOOD_vs_HCC
IMMT	983.636	1.67049	0.815194	2.04919	0.0404433	0.128196	2.9475	BLOOD_vs_HCC
SNRPE	211.86	-2.09015	1.02007	-2.04902	0.0404599	0.611112	0.250299	BLOOD_vs_HCC
HIST1H2BC	38.8806	-6.09803	2.97738	-2.04812	0.040548	1	0.10137	BLOOD_vs_HCC
POLR3C	645.18	2.20424	1.07665	2.04732	0.0406265	0.12181	3.20681	BLOOD_vs_HCC
CLEC2D	287.368	2.88185	1.40795	2.04684	0.040674	0.336139	0.686119	BLOOD_vs_HCC
ATXN7L3B	1061.85	1.17379	0.573559	2.0465	0.0407076	0.14066	2.63024	BLOOD_vs_HCC
CSNK2A2	368.072	2.20212	1.07654	2.04555	0.0408004	0.121879	3.20681	BLOOD_vs_HCC
WDR48	544.378	1.73057	0.846692	2.04392	0.0409618	0.126598	3.0626	BLOOD_vs_HCC
ZNF641	232.76	3.60378	1.76317	2.04391	0.040962	0.523365	0.332526	BLOOD_vs_HCC
CHTF8	247.888	3.69756	1.80935	2.04358	0.0409949	0.523365	0.332526	BLOOD_vs_HCC
GALC	397.508	-2.13179	1.04331	-2.0433	0.0410229	0.123759	3.16329	BLOOD_vs_HCC
NDUFS8	374.827	-1.66461	0.814828	-2.04289	0.041063	0.123759	3.16329	BLOOD_vs_HCC
CPSF2	353.961	2.58449	1.26536	2.0425	0.0411017	0.126702	3.06512	BLOOD_vs_HCC
IGFLR1	98.2572	-4.52381	2.21612	-2.04132	0.0412195	0.603478	0.260864	BLOOD_vs_HCC
HSD17B4	592.746	1.67746	0.822578	2.03928	0.0414224	0.127237	3.06512	BLOOD_vs_HCC
MYO5A	382.669	2.70341	1.32601	2.03876	0.0414741	0.127283	3.06512	BLOOD_vs_HCC
ARCN1	564.25	1.99758	0.980944	2.03638	0.0417118	0.127489	3.06512	BLOOD_vs_HCC
MEI1	627.079	1.76665	0.867602	2.03624	0.0417258	0.127489	3.06512	BLOOD_vs_HCC
LLPH	129.924	-2.60226	1.27855	-2.03532	0.0418185	0.832764	0.149408	BLOOD_vs_HCC
MDN1	616.531	1.57262	0.772932	2.03462	0.0418891	0.12798	3.0626	BLOOD_vs_HCC
SEH1L	218.653	3.51067	1.72649	2.03341	0.0420111	0.530816	0.332526	BLOOD_vs_HCC
SYNE1	524.768	1.67163	0.822227	2.03306	0.0420469	0.133541	2.92032	BLOOD_vs_HCC
USP19	279.76	2.84284	1.39868	2.03252	0.0421013	0.531323	0.332526	BLOOD_vs_HCC
SRP19	319.821	-1.72726	0.849996	-2.03208	0.0421456	0.339204	0.700022	BLOOD_vs_HCC
LRSAM1	110.072	5.00504	2.46542	2.03009	0.0423471	0.612118	0.260864	BLOOD_vs_HCC
NT5DC1	307.138	2.36688	1.16611	2.02972	0.0423851	0.5331	0.332526	BLOOD_vs_HCC
ZNF277	281.034	2.84808	1.40337	2.02945	0.0424125	0.5331	0.332526	BLOOD_vs_HCC
HNRNPA3	999.625	-1.09872	0.541721	-2.02819	0.0425406	0.13363	2.9475	BLOOD_vs_HCC
RNPEPL1	442.881	2.14259	1.05651	2.02799	0.0425612	0.125853	3.20681	BLOOD_vs_HCC
NBDY	353.08	-1.64491	0.811654	-2.02661	0.0427024	0.351196	0.672881	BLOOD_vs_HCC
LINS1	272.324	2.8007	1.38239	2.02598	0.0427664	0.342795	0.700022	BLOOD_vs_HCC
TUBA4A	935.555	-1.34275	0.66285	-2.02572	0.0427931	0.134188	2.9475	BLOOD_vs_HCC
CCDC65	119.961	5.12853	2.53172	2.02571	0.0427948	1	0.0767671	BLOOD_vs_HCC
ITGA6	270.141	2.78997	1.37735	2.02561	0.0428047	0.536586	0.332526	BLOOD_vs_HCC
TMIGD2	181.217	-3.47996	1.71843	-2.02508	0.0428595	0.632613	0.250299	BLOOD_vs_HCC
ABHD10	115.249	5.07135	2.50564	2.02398	0.0429725	0.618734	0.260864	BLOOD_vs_HCC
KDM5A	1374.67	1.08748	0.537658	2.02262	0.0431125	0.145374	2.64633	BLOOD_vs_HCC
NBPF10	61.8353	-3.61627	1.78953	-2.02079	0.0433018	1	0.110809	BLOOD_vs_HCC
VRK3	570.266	1.80274	0.892204	2.02055	0.0433268	0.131329	3.0626	BLOOD_vs_HCC
TRAC	688.226	1.91333	0.947083	2.02023	0.0433591	0.136827	2.91363	BLOOD_vs_HCC
ZBTB40	309.394	2.37799	1.1771	2.02021	0.0433619	0.342795	0.709168	BLOOD_vs_HCC
USF3	262.565	2.74673	1.36097	2.01822	0.0435687	0.355535	0.672881	BLOOD_vs_HCC
ZFAND6	680.183	1.57679	0.781699	2.01714	0.0436813	0.137034	2.92829	BLOOD_vs_HCC
SUB1	1023.41	-1.04052	0.51592	-2.01683	0.0437131	0.137705	2.91363	BLOOD_vs_HCC
GSAP	295.965	2.92676	1.45128	2.01668	0.043729	0.543378	0.332526	BLOOD_vs_HCC
HAUS5	110.172	5.00636	2.48551	2.01422	0.0439869	1	0.0503501	BLOOD_vs_HCC
SMIM3	240.732	-2.61801	1.30045	-2.01315	0.0440985	0.3542	0.686119	BLOOD_vs_HCC
PABPN1	194.673	-2.40811	1.19633	-2.01291	0.0441236	0.673307	0.230759	BLOOD_vs_HCC
PHF19	106.197	-2.82166	1.40234	-2.01211	0.0442082	0.85888	0.149408	BLOOD_vs_HCC
BHLHE40	1149.15	-1.16239	0.577705	-2.01208	0.0442116	0.138317	2.91363	BLOOD_vs_HCC
GALNT2	254.678	3.73519	1.85648	2.01197	0.044223	0.347087	0.709168	BLOOD_vs_HCC
AP1G2	843.981	1.65445	0.822445	2.01162	0.0442598	0.138009	2.92829	BLOOD_vs_HCC
PSMB7	962.809	1.43497	0.713343	2.01162	0.0442605	0.148494	2.64633	BLOOD_vs_HCC
ABCC10	217.907	3.5052	1.74288	2.01115	0.0443092	0.547686	0.332526	BLOOD_vs_HCC
LPAR2	233.013	-2.75861	1.37212	-2.01047	0.0443814	0.547941	0.332526	BLOOD_vs_HCC
SPEN	886.213	1.3002	0.646716	2.01047	0.0443816	0.149436	2.63024	BLOOD_vs_HCC
NDUFB4	422.503	-1.58618	0.78903	-2.01029	0.0444006	0.134003	3.06512	BLOOD_vs_HCC
MRPL13	285.989	2.87475	1.43011	2.01016	0.0444141	0.359526	0.672881	BLOOD_vs_HCC
OGFR	166.803	-2.37058	1.17968	-2.00952	0.0444821	0.675857	0.230759	BLOOD_vs_HCC
KLF8	148.82	5.43808	2.70732	2.00866	0.0445737	0.646673	0.250299	BLOOD_vs_HCC
SPIN3	130.407	5.24876	2.61497	2.0072	0.0447286	1	0.0503501	BLOOD_vs_HCC
TRDMT1	113.355	5.04812	2.5153	2.00697	0.0447532	1	0.0503501	BLOOD_vs_HCC
ATL2	231.596	3.59538	1.79384	2.00429	0.0450389	0.36283	0.672881	BLOOD_vs_HCC
DNAH1	114.924	5.06764	2.52856	2.00416	0.045053	1	0.0503501	BLOOD_vs_HCC
TRERF1	225.728	3.55838	1.77587	2.00374	0.0450981	0.551658	0.332526	BLOOD_vs_HCC
CUTA	1322.8	-1.05222	0.525557	-2.00211	0.0452732	0.150379	2.64633	BLOOD_vs_HCC
METTL18	300.785	2.95007	1.47372	2.00178	0.0453085	0.355535	0.700022	BLOOD_vs_HCC
INO80B	26.5993	-5.46151	2.72873	-2.00149	0.04534	1	0	BLOOD_vs_HCC
TRIT1	236.689	3.62694	1.81373	1.99971	0.0455318	0.356318	0.700022	BLOOD_vs_HCC
MAVS	257.663	2.71754	1.35902	1.99964	0.0455393	0.354069	0.709168	BLOOD_vs_HCC
TRMT13	312.308	2.39198	1.19644	1.99924	0.0455819	0.365148	0.672881	BLOOD_vs_HCC
ARHGAP30	1357.21	1.36735	0.68438	1.99794	0.0457227	0.141354	2.92829	BLOOD_vs_HCC
MRPS27	317.436	2.41838	1.21046	1.9979	0.045728	0.357158	0.700022	BLOOD_vs_HCC
MTPN	651.351	-1.39725	0.699366	-1.99788	0.04573	0.141642	2.92032	BLOOD_vs_HCC
JAKMIP2	163.557	5.57675	2.79201	1.9974	0.0457822	0.655629	0.250299	BLOOD_vs_HCC
CCDC77	113.164	5.04581	2.52702	1.99674	0.0458532	0.875941	0.149408	BLOOD_vs_HCC
CNR2	224.464	3.54851	1.77735	1.99651	0.045878	0.557458	0.332526	BLOOD_vs_HCC
CCDC71L	136.701	-2.99691	1.50161	-1.9958	0.0459557	0.69007	0.231046	BLOOD_vs_HCC
DEK	861.55	-1.23738	0.620039	-1.99564	0.0459726	0.152072	2.64633	BLOOD_vs_HCC
CTC1	530.136	1.68836	0.846241	1.99513	0.0460286	0.137708	3.0626	BLOOD_vs_HCC
HIBADH	270.992	2.79299	1.40011	1.99483	0.0460612	0.36712	0.672881	BLOOD_vs_HCC
CYB561	337.368	2.50985	1.25823	1.99475	0.04607	0.559251	0.332526	BLOOD_vs_HCC
NUDCD3	531.911	2.14505	1.07649	1.99263	0.0463019	0.134919	3.16329	BLOOD_vs_HCC
DNAJC1	260.178	-2.91897	1.46574	-1.99147	0.0464294	0.357454	0.709168	BLOOD_vs_HCC
RBBP4	914.386	1.25787	0.631744	1.99111	0.0464685	0.142117	2.9475	BLOOD_vs_HCC
PIK3R1	1598.08	-0.931839	0.468045	-1.99092	0.0464897	0.153455	2.63024	BLOOD_vs_HCC
TAX1BP3	52.7837	-3.81388	1.91577	-1.99078	0.046505	0.839182	0.164052	BLOOD_vs_HCC
PSME2	1420.83	-0.935031	0.470007	-1.9894	0.0466575	0.143866	2.91363	BLOOD_vs_HCC
NT5C3A	471.968	-1.43493	0.721756	-1.98811	0.0467996	0.134649	3.20681	BLOOD_vs_HCC
ZNF611	353.154	2.13907	1.07608	1.98783	0.0468308	0.362823	0.700022	BLOOD_vs_HCC
HDHD2	62.2254	-3.56938	1.79606	-1.98733	0.0468854	1	0.110809	BLOOD_vs_HCC
RPUSD1	105.635	4.94435	2.48833	1.98701	0.0469211	0.887352	0.149408	BLOOD_vs_HCC
EIF3F	1122.24	-0.99176	0.499248	-1.98651	0.046977	0.144333	2.91363	BLOOD_vs_HCC
YWHAZ	3332.22	-0.71907	0.362119	-1.98573	0.0470633	0.154841	2.63024	BLOOD_vs_HCC
PDLIM5	820.402	-1.18896	0.598846	-1.98542	0.0470975	0.154263	2.64633	BLOOD_vs_HCC
PCNX3	103.796	4.91962	2.47902	1.9845	0.0471998	0.890674	0.149408	BLOOD_vs_HCC
HACD1	92.673	-3.07152	1.54857	-1.98346	0.0473166	0.891045	0.149408	BLOOD_vs_HCC
FNBP4	1592.91	1.07592	0.542455	1.98342	0.0473207	0.143866	2.9475	BLOOD_vs_HCC
BAP1	379.748	2.24999	1.13492	1.98251	0.0474223	0.14066	3.0626	BLOOD_vs_HCC
CBWD3	25.2872	-7.36595	3.71717	-1.9816	0.0475239	1	0	BLOOD_vs_HCC
MTCH2	483.328	1.75257	0.88445	1.98154	0.0475308	0.140843	3.0626	BLOOD_vs_HCC
EIF2S1	633.745	1.46312	0.738647	1.98081	0.0476127	0.137793	3.16329	BLOOD_vs_HCC
AP3M1	486.5	1.763	0.890134	1.9806	0.047636	0.140843	3.06512	BLOOD_vs_HCC
IP6K2	797.031	1.69072	0.853639	1.9806	0.0476365	0.155392	2.64633	BLOOD_vs_HCC
FOXK2	209.611	3.44784	1.74086	1.98054	0.0476431	0.71621	0.22353	BLOOD_vs_HCC
GNL3L	575.246	2.02604	1.02298	1.98052	0.0476451	0.140843	3.06512	BLOOD_vs_HCC
PLK3	331.782	-1.83592	0.927211	-1.98005	0.0476981	0.363845	0.709168	BLOOD_vs_HCC
DEF6	1179.46	1.07053	0.540721	1.97982	0.0477241	0.144725	2.9475	BLOOD_vs_HCC
GET4	53.1999	-3.75362	1.89657	-1.97916	0.0477985	1	0.100163	BLOOD_vs_HCC
ATAD5	120.78	5.13708	2.59634	1.97859	0.0478625	1	0.0503501	BLOOD_vs_HCC
PRMT9	279.338	-3.05351	1.54384	-1.97786	0.0479447	0.364609	0.709168	BLOOD_vs_HCC
C12orf4	103.622	4.91805	2.48674	1.97771	0.0479614	1	0.0767671	BLOOD_vs_HCC
C1D	96.1646	-2.88367	1.45849	-1.97716	0.048024	1	0.0503501	BLOOD_vs_HCC
ARL5A	248.535	-2.01913	1.02142	-1.97678	0.048067	0.375446	0.672881	BLOOD_vs_HCC
HIF1A	613.429	-1.50469	0.761574	-1.97576	0.048182	0.142117	3.0626	BLOOD_vs_HCC
ATP1B3	568.206	-1.53798	0.778662	-1.97516	0.0482504	0.142117	3.06512	BLOOD_vs_HCC
CIRBP	1974.15	-0.864149	0.437558	-1.97494	0.0482752	0.1476	2.91363	BLOOD_vs_HCC
ZNF181	112.957	5.04239	2.55326	1.97488	0.0482816	0.721542	0.22353	BLOOD_vs_HCC
PRDX3	690.684	1.7528	0.888064	1.97373	0.0484126	0.158047	2.63024	BLOOD_vs_HCC
PAFAH1B2	456.786	1.90715	0.966316	1.97362	0.0484244	0.142412	3.0626	BLOOD_vs_HCC
PPP1R9B	108.331	4.98025	2.52379	1.97332	0.0484594	0.723514	0.22353	BLOOD_vs_HCC
MTPAP	251.147	2.67854	1.35745	1.97321	0.0484711	0.373844	0.686119	BLOOD_vs_HCC
SMC6	363.145	2.62208	1.3296	1.97208	0.0486002	0.139805	3.16329	BLOOD_vs_HCC
AGBL5	237.205	3.62993	1.84231	1.97031	0.0488023	0.37787	0.672881	BLOOD_vs_HCC
SLU7	683.354	1.44425	0.733492	1.96901	0.0489518	0.147824	2.9475	BLOOD_vs_HCC
RBM27	238.434	-2.1686	1.10234	-1.96727	0.0491525	0.581979	0.332526	BLOOD_vs_HCC
EXO5	103.015	4.90945	2.49572	1.96715	0.0491659	0.730051	0.22353	BLOOD_vs_HCC
ANKRD27	348.063	2.55854	1.30082	1.96686	0.0491993	0.376014	0.686119	BLOOD_vs_HCC
HELZ	1180.25	1.07161	0.545251	1.96536	0.049373	0.160499	2.63024	BLOOD_vs_HCC
UBE2D3	2743.73	-0.75503	0.384216	-1.96512	0.0494006	0.149914	2.91363	BLOOD_vs_HCC
ERCC4	103.004	4.90848	2.49789	1.96505	0.0494079	1	0.0503501	BLOOD_vs_HCC
ANKS3	106.504	4.95798	2.52341	1.96479	0.0494383	0.670239	0.260864	BLOOD_vs_HCC
SULT1A1	114.533	5.06026	2.57594	1.96443	0.0494802	0.732697	0.22353	BLOOD_vs_HCC
CSF1	286.476	-3.2381	1.64886	-1.96384	0.0495484	0.376802	0.686119	BLOOD_vs_HCC
IRF1	1951.27	-1.0258	0.522377	-1.96372	0.0495627	0.160369	2.64633	BLOOD_vs_HCC
SPNS3	61.1566	-3.69568	1.88224	-1.96345	0.0495943	1	0.100163	BLOOD_vs_HCC
PSMD9	209.605	-2.68097	1.36585	-1.96285	0.0496638	0.91359	0.149408	BLOOD_vs_HCC
DSEL	119.641	5.1262	2.61168	1.9628	0.04967	0.672315	0.260864	BLOOD_vs_HCC
DCUN1D2	106.527	4.95601	2.5251	1.9627	0.0496812	0.734754	0.22353	BLOOD_vs_HCC
SH3BP5	145.226	-2.42711	1.23674	-1.9625	0.0497039	0.734825	0.22353	BLOOD_vs_HCC
MED26	72.0396	-5.77756	2.9445	-1.96215	0.0497449	1	0.10137	BLOOD_vs_HCC
LETMD1	588.976	1.85364	0.944899	1.96173	0.0497941	0.150252	2.92032	BLOOD_vs_HCC
RALGAPB	395.658	1.96833	1.00338	1.9617	0.0497978	0.145216	3.0626	BLOOD_vs_HCC
SLC25A42	108.207	4.98104	2.53976	1.96123	0.0498526	0.673189	0.260864	BLOOD_vs_HCC
PPP3CB	212.838	3.46958	1.76984	1.96039	0.0499507	0.9168	0.149408	BLOOD_vs_HCC
RNGTT	322.308	2.44153	1.24567	1.96002	0.0499936	0.382578	0.672881	BLOOD_vs_HCC
TNK2	222.66	3.53658	1.8046	1.95976	0.0500233	0.375446	0.700022	BLOOD_vs_HCC
FAM122A	100.936	4.87994	2.4915	1.95863	0.0501558	1	0.0767671	BLOOD_vs_HCC
DDX58	616.335	1.73926	0.8895	1.95533	0.0505446	0.151759	2.92032	BLOOD_vs_HCC
DCAF12	373.946	2.22675	1.13882	1.95531	0.0505469	0.142117	3.20681	BLOOD_vs_HCC
TAZ	536.244	1.70664	0.873024	1.95486	0.0506	0.147185	3.06512	BLOOD_vs_HCC
FMN1	286.649	3.91205	2.00182	1.95425	0.0506721	0.381713	0.686119	BLOOD_vs_HCC
RRAS2	140.901	-2.55429	1.30707	-1.9542	0.0506773	0.92523	0.149408	BLOOD_vs_HCC
ELMO1	596.115	1.68653	0.863273	1.95365	0.0507428	0.143866	3.16329	BLOOD_vs_HCC
BAZ2A	1096.54	1.15325	0.590332	1.95357	0.0507524	0.152103	2.91363	BLOOD_vs_HCC
FLAD1	600.273	2.09229	1.07115	1.95332	0.0507818	0.152094	2.92032	BLOOD_vs_HCC
RBL2	1476.8	1.2067	0.618358	1.95146	0.0510028	0.163312	2.64633	BLOOD_vs_HCC
PRMT6	110.293	5.00629	2.5662	1.95085	0.0510747	1	0.0767671	BLOOD_vs_HCC
INPP4B	1675.57	0.979651	0.502188	1.95076	0.0510852	0.152723	2.91363	BLOOD_vs_HCC
RSL24D1	555.761	-1.47247	0.755478	-1.94905	0.0512894	0.143866	3.20681	BLOOD_vs_HCC
TBC1D17	398.498	1.97855	1.01532	1.94871	0.0513305	0.14856	3.06512	BLOOD_vs_HCC
ANKRD52	372.116	2.21883	1.13876	1.94845	0.0513607	0.152818	2.92032	BLOOD_vs_HCC
PHIP	1529.37	1.0079	0.5174	1.94801	0.051414	0.163973	2.64633	BLOOD_vs_HCC
SLC46A3	315.569	3.02226	1.55158	1.94786	0.0514317	0.389044	0.672881	BLOOD_vs_HCC
SDC4	31.8759	-6.79538	3.48977	-1.94723	0.0515075	1	0.100163	BLOOD_vs_HCC
TUBG1	98.9332	4.85034	2.49155	1.94672	0.0515684	0.752564	0.22353	BLOOD_vs_HCC
RPN1	2530.42	0.811751	0.417071	1.94632	0.0516168	0.164357	2.64633	BLOOD_vs_HCC
ZNF44	569.762	1.61482	0.830112	1.9453	0.0517384	0.144333	3.20681	BLOOD_vs_HCC
SLC39A11	102.868	4.90802	2.52393	1.94459	0.051824	0.7549	0.22353	BLOOD_vs_HCC
ZFAND2A	331.259	-2.28759	1.1765	-1.9444	0.0518468	0.598798	0.332526	BLOOD_vs_HCC
ABCA1	247.826	2.65832	1.36809	1.94309	0.0520051	0.387094	0.686119	BLOOD_vs_HCC
ZNF276	383.474	1.91875	0.987521	1.943	0.052016	0.149914	3.0626	BLOOD_vs_HCC
MCTP2	196.971	-2.16379	1.11389	-1.94256	0.0520694	0.741091	0.231046	BLOOD_vs_HCC
FAM160A2	258.979	2.72622	1.40371	1.94215	0.052119	0.380529	0.709168	BLOOD_vs_HCC
HSF5	116.28	5.0823	2.6173	1.94181	0.0521606	0.692195	0.260864	BLOOD_vs_HCC
NEK3	111.986	5.0279	2.59009	1.9412	0.0522337	0.758138	0.22353	BLOOD_vs_HCC
DPH2	258.041	2.71994	1.40284	1.93888	0.0525165	0.38225	0.709168	BLOOD_vs_HCC
RAF1	829.72	1.39786	0.720981	1.93883	0.0525224	0.155486	2.91363	BLOOD_vs_HCC
RAB5C	314.657	-1.66291	0.857721	-1.93875	0.0525318	0.389325	0.686119	BLOOD_vs_HCC
EFHC2	173.472	5.66149	2.92148	1.93788	0.0526375	0.745935	0.231046	BLOOD_vs_HCC
DCHS1	368.679	2.64499	1.36502	1.93769	0.0526612	0.148053	3.16329	BLOOD_vs_HCC
ZBTB25	740.186	1.32375	0.6833	1.93729	0.0527103	0.167931	2.63024	BLOOD_vs_HCC
DTX3L	293.346	2.29677	1.18604	1.93651	0.0528057	0.390979	0.686119	BLOOD_vs_HCC
ZNF365	111.827	5.02609	2.59596	1.93612	0.0528528	1	0.0767671	BLOOD_vs_HCC
TWF1	140.323	-3.98617	2.05968	-1.93533	0.0529495	0.956613	0.149408	BLOOD_vs_HCC
LRPPRC	642.735	1.48566	0.767675	1.93527	0.0529571	0.151617	3.06512	BLOOD_vs_HCC
ACTN4	648.943	-1.35217	0.699666	-1.9326	0.0532861	0.149309	3.16329	BLOOD_vs_HCC
SHPRH	502.181	1.81444	0.938954	1.93241	0.0533093	0.152103	3.0626	BLOOD_vs_HCC
NIT2	429.313	1.80914	0.936699	1.9314	0.0534339	0.148062	3.20681	BLOOD_vs_HCC
CARNS1	97.6822	4.83285	2.50261	1.93112	0.0534677	0.96401	0.149408	BLOOD_vs_HCC
ABHD4	334.372	2.05348	1.06347	1.93092	0.0534924	0.385595	0.709168	BLOOD_vs_HCC
CORO1B	74.9714	-3.13868	1.62615	-1.93012	0.0535914	1	0.0767671	BLOOD_vs_HCC
ADPRM	98.6242	4.8461	2.51087	1.93005	0.053601	1	0.0503501	BLOOD_vs_HCC
PRPF6	871.847	1.37232	0.711136	1.92976	0.0536365	0.169674	2.63024	BLOOD_vs_HCC
RNF207	299.739	2.32884	1.20711	1.92926	0.0536984	0.400946	0.672881	BLOOD_vs_HCC
SH3TC1	175.185	-2.40193	1.24525	-1.92886	0.0537478	0.75606	0.231046	BLOOD_vs_HCC
TAF15	410.951	-2.10635	1.0923	-1.92836	0.0538098	0.152809	3.0626	BLOOD_vs_HCC
TBRG4	370.533	2.21188	1.14705	1.92832	0.0538152	0.158047	2.92032	BLOOD_vs_HCC
RNF11	430.728	-1.77812	0.922109	-1.92832	0.0538158	0.152809	3.0626	BLOOD_vs_HCC
ODF2L	571.167	-1.39763	0.725049	-1.92763	0.0539008	0.150252	3.16329	BLOOD_vs_HCC
ATM	1208.31	1.04766	0.543539	1.92748	0.0539202	0.158047	2.92829	BLOOD_vs_HCC
POP4	246.229	2.64823	1.37411	1.92724	0.05395	0.391143	0.700022	BLOOD_vs_HCC
RAPGEF6	228.023	-3.26839	1.69666	-1.92637	0.0540587	0.402152	0.672881	BLOOD_vs_HCC
TAF10	136.465	-2.68892	1.3959	-1.92629	0.0540677	0.771456	0.22353	BLOOD_vs_HCC
TSC22D2	333.321	-1.60411	0.83282	-1.92612	0.0540898	0.388833	0.709168	BLOOD_vs_HCC
GYG1	293.345	2.29594	1.19216	1.92587	0.0541205	0.397852	0.686119	BLOOD_vs_HCC
ABHD16A	73.3166	-3.26458	1.69516	-1.92582	0.0541263	0.910059	0.164052	BLOOD_vs_HCC
GMEB1	267.047	2.77064	1.43935	1.92492	0.0542392	0.398534	0.686119	BLOOD_vs_HCC
DDX59	340.757	2.08251	1.08195	1.92478	0.0542566	0.402484	0.672881	BLOOD_vs_HCC
PRC1	32.4945	-5.99011	3.11406	-1.92357	0.0544087	1	0.110809	BLOOD_vs_HCC
LRMP	497.307	-2.09173	1.08752	-1.92339	0.0544306	0.149914	3.20681	BLOOD_vs_HCC
CENPC	456.029	-1.52962	0.795922	-1.92182	0.0546287	0.151617	3.16329	BLOOD_vs_HCC
IL17RA	442.69	1.85721	0.966823	1.92094	0.0547392	0.150293	3.20681	BLOOD_vs_HCC
UBE2G2	640.264	1.47945	0.770688	1.91965	0.0549021	0.154876	3.06512	BLOOD_vs_HCC
COX15	137.372	5.32518	2.77412	1.91959	0.0549097	0.778781	0.22353	BLOOD_vs_HCC
ACLY	485.205	1.7585	0.916779	1.91813	0.0550949	0.160763	2.92032	BLOOD_vs_HCC
MED22	103.114	4.9116	2.56133	1.9176	0.055162	0.714439	0.260864	BLOOD_vs_HCC
WAC	951.726	1.15041	0.600185	1.91675	0.0552691	0.172287	2.64633	BLOOD_vs_HCC
PCNT	375.844	1.88748	0.985263	1.91572	0.0554012	0.155775	3.06512	BLOOD_vs_HCC
TBC1D25	375.628	2.67321	1.39548	1.91562	0.0554129	0.155809	3.0626	BLOOD_vs_HCC
AP4B1	469.117	1.70569	0.890447	1.91554	0.0554233	0.152723	3.16329	BLOOD_vs_HCC
SREK1IP1	127.471	-2.68466	1.40157	-1.91547	0.0554325	0.992619	0.149408	BLOOD_vs_HCC
MTMR4	421.472	2.06568	1.07878	1.91482	0.0555155	0.155843	3.06512	BLOOD_vs_HCC
RNF216	813.456	1.36462	0.713012	1.91389	0.0556346	0.161636	2.92829	BLOOD_vs_HCC
ARPC2	6766.3	0.56717	0.296416	1.91343	0.0556933	0.162361	2.91363	BLOOD_vs_HCC
SLC39A14	100.504	4.87203	2.54775	1.91229	0.055839	0.718395	0.260864	BLOOD_vs_HCC
MTOR	269.233	2.78416	1.4562	1.91193	0.0558851	0.400946	0.700022	BLOOD_vs_HCC
ITFG2	399.655	1.98273	1.03777	1.91058	0.056059	0.152521	3.20681	BLOOD_vs_HCC
SYNRG	747.617	1.33979	0.701588	1.90966	0.0561769	0.16282	2.92829	BLOOD_vs_HCC
KLF9	163.759	-2.44592	1.28086	-1.90959	0.0561866	0.739576	0.250299	BLOOD_vs_HCC
CEP295	104.815	4.93535	2.58475	1.90941	0.0562089	0.787543	0.22353	BLOOD_vs_HCC
GDI2	1823.67	0.957205	0.501336	1.90931	0.0562223	0.174308	2.64633	BLOOD_vs_HCC
COG7	106.18	4.95095	2.59431	1.90839	0.0563413	0.721542	0.260864	BLOOD_vs_HCC
GIT1	103.068	4.91059	2.57448	1.90741	0.0564674	1	0.149408	BLOOD_vs_HCC
OTUB1	964.972	1.43857	0.754473	1.90673	0.0565561	0.174531	2.64633	BLOOD_vs_HCC
ERP27	95.7921	4.80359	2.51976	1.90637	0.0566027	1	0.0767671	BLOOD_vs_HCC
VPS45	389.78	2.2908	1.2017	1.90631	0.0566102	0.163969	2.92032	BLOOD_vs_HCC
SH3BP1	72.74	-3.32596	1.74481	-1.9062	0.0566244	0.936907	0.164052	BLOOD_vs_HCC
RAP1A	519.812	-2.22639	1.16816	-1.9059	0.0566633	0.163969	2.92032	BLOOD_vs_HCC
MRI1	105.773	4.9484	2.59639	1.90588	0.0566657	1	0.0767671	BLOOD_vs_HCC
ZNF442	98.9932	4.85213	2.54593	1.90583	0.0566717	1	0.0503501	BLOOD_vs_HCC
TVP23C	62.8115	-4.59317	2.41038	-1.90558	0.0567048	1	0.100163	BLOOD_vs_HCC
TMEM138	200.323	3.37997	1.77376	1.90554	0.0567097	0.791477	0.22353	BLOOD_vs_HCC
SKP1	2360.6	-0.857062	0.45002	-1.9045	0.0568455	0.163969	2.92829	BLOOD_vs_HCC
MAP1LC3A	47.7591	-4.91704	2.58324	-1.90344	0.0569833	1	0.110809	BLOOD_vs_HCC
ZHX3	94.2609	4.78097	2.51439	1.90144	0.057244	1	0.0503501	BLOOD_vs_HCC
PLEK	147.977	5.43234	2.85855	1.90038	0.0573829	0.749937	0.250299	BLOOD_vs_HCC
DDB1	972.704	1.27041	0.668544	1.90027	0.0573978	0.164222	2.9475	BLOOD_vs_HCC
HIST1H2AC	136.264	-2.69556	1.41903	-1.89958	0.0574877	0.784516	0.230759	BLOOD_vs_HCC
RARS2	418.379	1.76897	0.931565	1.89892	0.0575746	0.160499	3.06512	BLOOD_vs_HCC
KIF5B	1523.87	-0.848628	0.446902	-1.89891	0.0575761	0.177133	2.64633	BLOOD_vs_HCC
TET2	544.529	1.72996	0.911358	1.89822	0.057667	0.160499	3.06512	BLOOD_vs_HCC
ARRDC3	538.887	1.71306	0.902519	1.89808	0.0576849	0.160499	3.06512	BLOOD_vs_HCC
XYLT1	241.13	2.61756	1.37997	1.89682	0.0578517	0.636972	0.332526	BLOOD_vs_HCC
PRDX1	1073.51	-1.16933	0.616648	-1.89627	0.057924	0.166989	2.91363	BLOOD_vs_HCC
GMFG	1680.56	-0.884158	0.466314	-1.89606	0.0579523	0.166366	2.92829	BLOOD_vs_HCC
MIR22HG	208.012	-2.52027	1.33056	-1.89415	0.0582052	0.789732	0.230759	BLOOD_vs_HCC
PCMTD2	338.019	2.07094	1.0934	1.89403	0.0582211	0.420787	0.672881	BLOOD_vs_HCC
NCAPD2	257.992	2.71886	1.43795	1.89079	0.058653	0.642818	0.332526	BLOOD_vs_HCC
AGK	244.04	2.6353	1.3942	1.89019	0.0587331	0.409345	0.709168	BLOOD_vs_HCC
BAG1	286.098	-1.83168	0.969531	-1.88924	0.0588597	0.418926	0.686119	BLOOD_vs_HCC
CITED4	32.7409	-5.78405	3.06214	-1.88889	0.0589067	0.967023	0.164052	BLOOD_vs_HCC
USP3	552.344	1.56575	0.829115	1.88846	0.0589641	0.159738	3.16329	BLOOD_vs_HCC
FKBP11	566.285	-1.4213	0.752654	-1.88838	0.0589751	0.158047	3.20681	BLOOD_vs_HCC
SZRD1	288.285	-1.68527	0.893152	-1.88688	0.0591771	0.425564	0.672881	BLOOD_vs_HCC
HMGA1	297.483	-1.95834	1.03807	-1.88652	0.059225	0.411812	0.709168	BLOOD_vs_HCC
DIDO1	773.031	1.39507	0.740537	1.88386	0.0595838	0.169864	2.91363	BLOOD_vs_HCC
BCLAF1	956.51	-1.01642	0.539624	-1.88358	0.0596222	0.169864	2.91363	BLOOD_vs_HCC
SMNDC1	280.48	-1.89885	1.00855	-1.88276	0.0597333	0.42319	0.686119	BLOOD_vs_HCC
NIPSNAP1	273.914	2.80889	1.49273	1.88171	0.0598747	0.418582	0.700022	BLOOD_vs_HCC
2023-03-07	1222.06	1.06651	0.566926	1.88121	0.0599427	0.169346	2.9475	BLOOD_vs_HCC
TBCEL	93.0479	4.76141	2.53116	1.88112	0.0599552	1	0.149408	BLOOD_vs_HCC
TTC7A	277.166	-1.93327	1.02828	-1.88009	0.0600953	0.429038	0.672881	BLOOD_vs_HCC
SP3	509.301	1.83527	0.976185	1.88004	0.060102	0.170571	2.92032	BLOOD_vs_HCC
PRKAA1	336.727	2.06375	1.09799	1.87957	0.0601672	0.424988	0.686119	BLOOD_vs_HCC
PNMA1	196.441	-2.17377	1.15669	-1.87931	0.0602018	0.769431	0.250299	BLOOD_vs_HCC
PSMD13	1046.24	1.07526	0.572338	1.87872	0.0602833	0.18322	2.64633	BLOOD_vs_HCC
DFFB	91.4123	4.73693	2.52145	1.87866	0.0602914	1	0.0503501	BLOOD_vs_HCC
FNBP1	2082.98	-0.925551	0.492796	-1.87816	0.0603588	0.183862	2.63024	BLOOD_vs_HCC
RUFY3	282.082	2.85343	1.51989	1.8774	0.0604636	0.653029	0.332526	BLOOD_vs_HCC
KLRG1	2338.04	0.84178	0.448385	1.87736	0.0604688	0.170922	2.92829	BLOOD_vs_HCC
TTLL11	25.4097	-7.00187	3.73113	-1.87661	0.0605721	1	0	BLOOD_vs_HCC
WHAMM	214.021	-2.05402	1.09483	-1.8761	0.0606411	0.806035	0.231046	BLOOD_vs_HCC
SSBP4	136.134	-3.01724	1.60843	-1.87589	0.0606704	0.819208	0.22353	BLOOD_vs_HCC
ZNF292	879.377	1.38647	0.739245	1.87552	0.0607212	0.183862	2.64633	BLOOD_vs_HCC
WARS	581.76	1.64739	0.878687	1.87483	0.0608159	0.172058	2.92032	BLOOD_vs_HCC
SH3GL1	98.5493	4.84384	2.5837	1.87477	0.0608241	0.820193	0.22353	BLOOD_vs_HCC
LPAR5	193.54	3.32836	1.77535	1.87476	0.0608252	1	0.149408	BLOOD_vs_HCC
TRIB2	1405.59	1.01701	0.542629	1.87423	0.0608992	0.172287	2.91363	BLOOD_vs_HCC
FAM98A	93.8297	4.77322	2.54694	1.8741	0.0609164	1	0.149408	BLOOD_vs_HCC
LYPLAL1	97.098	4.82404	2.57406	1.8741	0.0609173	1	0.149408	BLOOD_vs_HCC
ARF1	3263.64	0.688829	0.367693	1.87338	0.061016	0.171167	2.9475	BLOOD_vs_HCC
ATOX1	150.864	-2.27932	1.21674	-1.8733	0.0610271	0.775063	0.250299	BLOOD_vs_HCC
WDR46	418.174	1.76739	0.943522	1.87318	0.0610433	0.167151	3.06512	BLOOD_vs_HCC
RPS6KA1	526.731	1.88963	1.0089	1.87295	0.0610753	0.163473	3.16329	BLOOD_vs_HCC
LIF	99.9992	-4.31937	2.30726	-1.87208	0.0611958	0.822349	0.22353	BLOOD_vs_HCC
GLT8D1	571.231	1.44948	0.774349	1.87187	0.061225	0.172677	2.92032	BLOOD_vs_HCC
ACSL3	289.434	-1.79665	0.960715	-1.87012	0.0614673	0.429263	0.686119	BLOOD_vs_HCC
PEX1	271.396	2.79492	1.49462	1.86999	0.0614846	0.43401	0.672881	BLOOD_vs_HCC
ARMCX6	165.139	-2.18101	1.16663	-1.86949	0.0615542	0.811776	0.230759	BLOOD_vs_HCC
PKNOX1	90.5326	4.72303	2.52643	1.86945	0.0615605	0.825363	0.22353	BLOOD_vs_HCC
ALKBH3	202.449	3.39509	1.81612	1.86942	0.0615642	1	0.149408	BLOOD_vs_HCC
RPL4	5057.79	-0.582346	0.311513	-1.86941	0.0615653	0.185491	2.64633	BLOOD_vs_HCC
IL6R	680.912	1.43842	0.769547	1.86918	0.0615985	0.172287	2.9475	BLOOD_vs_HCC
HNRNPUL1	634.313	-1.24098	0.664336	-1.868	0.061762	0.163312	3.20681	BLOOD_vs_HCC
ARAP1	330.055	2.03274	1.08821	1.86797	0.0617668	0.425726	0.700022	BLOOD_vs_HCC
PKIG	60.3834	-5.21603	2.79366	-1.8671	0.0618882	1	0.164052	BLOOD_vs_HCC
CD320	244.089	-1.9317	1.03486	-1.86663	0.061953	0.435749	0.672881	BLOOD_vs_HCC
ARFIP2	328.346	2.02559	1.08538	1.86624	0.0620075	0.435749	0.672881	BLOOD_vs_HCC
SCD	52.1248	-5.92938	3.17818	-1.86565	0.06209	1	0.110809	BLOOD_vs_HCC
CARS	504.18	2.0607	1.10462	1.86552	0.0621084	0.16911	3.0626	BLOOD_vs_HCC
OAZ2	279.759	3.87607	2.07801	1.86528	0.0621415	0.431929	0.686119	BLOOD_vs_HCC
HEMK1	204.393	3.41111	1.82926	1.86475	0.0622159	0.817332	0.230759	BLOOD_vs_HCC
YEATS4	99.0762	4.8515	2.60209	1.86446	0.0622564	1	0.0503501	BLOOD_vs_HCC
ARHGAP31	291.642	-1.7726	0.951142	-1.86365	0.062371	0.425564	0.709168	BLOOD_vs_HCC
SNAP47	248.064	2.65926	1.427	1.86353	0.0623873	0.433247	0.686119	BLOOD_vs_HCC
RCSD1	1551.52	0.893207	0.479323	1.86348	0.0623954	0.174447	2.92829	BLOOD_vs_HCC
NDEL1	759.945	-1.10158	0.591219	-1.86324	0.0624282	0.187169	2.64633	BLOOD_vs_HCC
THOC2	895.645	1.13469	0.609001	1.8632	0.0624336	0.174447	2.92829	BLOOD_vs_HCC
CAPN15	96.6075	4.81581	2.58512	1.8629	0.0624766	1	0.0767671	BLOOD_vs_HCC
TMEM160	101.105	-2.64731	1.42108	-1.86288	0.0624786	1	0.0767671	BLOOD_vs_HCC
SP1	329.024	2.02894	1.08922	1.86274	0.0624989	0.437834	0.672881	BLOOD_vs_HCC
PI4KA	384.43	1.92197	1.03207	1.86224	0.0625691	0.169855	3.0626	BLOOD_vs_HCC
HDAC10	45.4999	-3.76912	2.02442	-1.86183	0.0626276	1	0.10938	BLOOD_vs_HCC
FAIM	89.9355	4.7136	2.53203	1.86159	0.062661	1	0.0767671	BLOOD_vs_HCC
ZMYM3	310.244	2.99663	1.61012	1.86112	0.0627267	0.66869	0.332526	BLOOD_vs_HCC
RHOH	1229.97	-1.29234	0.694548	-1.8607	0.0627871	0.188128	2.63024	BLOOD_vs_HCC
H1FX	174.581	-2.42323	1.3031	-1.85958	0.0629446	0.82103	0.230759	BLOOD_vs_HCC
PRKDC	1087.14	1.06785	0.574258	1.85953	0.0629516	0.188341	2.63024	BLOOD_vs_HCC
NIPBL	1448.54	0.965235	0.519346	1.85856	0.0630899	0.188475	2.63024	BLOOD_vs_HCC
DALRD3	482.654	1.75003	0.942395	1.857	0.0633108	0.170922	3.06512	BLOOD_vs_HCC
TAF2	423.089	1.78712	0.962474	1.8568	0.0633392	0.166169	3.20681	BLOOD_vs_HCC
TMUB1	133.723	-2.78228	1.49863	-1.85655	0.0633752	1	0.0503501	BLOOD_vs_HCC
RGS10	120.903	-3.34202	1.80041	-1.85626	0.0634171	1	0.0767671	BLOOD_vs_HCC
TP53I3	53.4057	-3.71077	1.9993	-1.85603	0.0634486	1	0.100163	BLOOD_vs_HCC
NBEAL1	131.533	-3.2194	1.73472	-1.85586	0.0634731	1	0.149408	BLOOD_vs_HCC
VTA1	566.011	1.60353	0.864218	1.85547	0.0635286	0.167995	3.16329	BLOOD_vs_HCC
UROS	342.613	2.5333	1.36603	1.8545	0.0636681	0.429373	0.709168	BLOOD_vs_HCC
BACE1-AS	92.2807	4.74908	2.56087	1.85448	0.0636703	1	0.149408	BLOOD_vs_HCC
TRUB2	283.937	2.86313	1.54402	1.85434	0.0636911	0.442249	0.672881	BLOOD_vs_HCC
PTTG1IP	1047.33	1.15044	0.620648	1.85362	0.0637942	0.189279	2.64633	BLOOD_vs_HCC
MBTPS2	94.2754	4.78075	2.57922	1.85356	0.0638019	1	0.0767671	BLOOD_vs_HCC
SNX1	678.151	1.43145	0.772462	1.8531	0.0638681	0.177434	2.92829	BLOOD_vs_HCC
PSMB10	370.36	-1.50805	0.814302	-1.85195	0.0640325	0.168958	3.16329	BLOOD_vs_HCC
NUDCD1	241.233	2.61736	1.41364	1.85151	0.0640964	0.443813	0.672881	BLOOD_vs_HCC
UBR3	254.366	2.6969	1.45708	1.85089	0.0641849	0.439223	0.686119	BLOOD_vs_HCC
HDLBP	603.41	1.38405	0.747793	1.85085	0.0641914	0.16911	3.16329	BLOOD_vs_HCC
OMA1	243.895	2.63329	1.42282	1.85075	0.0642052	0.435253	0.700022	BLOOD_vs_HCC
IRF2	373.912	1.8793	1.01551	1.8506	0.0642266	0.167931	3.20681	BLOOD_vs_HCC
PGS1	325.97	2.01428	1.08851	1.85048	0.0642438	0.439419	0.686119	BLOOD_vs_HCC
NAPEPLD	197.59	3.35886	1.81522	1.85039	0.0642577	0.846501	0.22353	BLOOD_vs_HCC
DLD	673.229	1.41964	0.767325	1.85012	0.0642961	0.190204	2.64633	BLOOD_vs_HCC
CAPN7	308.318	-1.72259	0.931351	-1.84956	0.0643773	0.439942	0.686119	BLOOD_vs_HCC
GEMIN8	94.6647	4.7856	2.58805	1.84912	0.064441	1	0.149408	BLOOD_vs_HCC
KLF13	164.481	-2.19498	1.18758	-1.84828	0.0645617	1	0.149408	BLOOD_vs_HCC
NUP93	361.949	2.17598	1.1775	1.84797	0.0646071	0.168293	3.20681	BLOOD_vs_HCC
CACUL1	583.435	1.65213	0.894239	1.84753	0.0646705	0.173557	3.06512	BLOOD_vs_HCC
CAMLG	327.394	-1.87462	1.01474	-1.84738	0.0646915	0.445918	0.672881	BLOOD_vs_HCC
ZNF691	93.1449	4.7623	2.57873	1.84676	0.0647812	1	0.0503501	BLOOD_vs_HCC
ATG13	640.387	1.63255	0.884421	1.8459	0.0649066	0.174149	3.0626	BLOOD_vs_HCC
USP4	825.912	1.2841	0.695751	1.84563	0.0649456	0.180919	2.91363	BLOOD_vs_HCC
NCAPH2	272.427	2.80062	1.51819	1.84472	0.0650789	0.442776	0.686119	BLOOD_vs_HCC
CALHM2	268.791	2.78208	1.50857	1.84418	0.0651566	0.442915	0.686119	BLOOD_vs_HCC
EXTL3	89.1598	4.7001	2.55014	1.84308	0.0653179	1	0.0767671	BLOOD_vs_HCC
PIAS1	619.882	1.5816	0.85831	1.8427	0.0653735	0.174447	3.06512	BLOOD_vs_HCC
MTFP1	63.7836	-3.40141	1.84622	-1.84236	0.0654225	1	0.10938	BLOOD_vs_HCC
MRPL57	354.519	-1.63125	0.885627	-1.84191	0.065488	0.181455	2.92032	BLOOD_vs_HCC
WDR89	100.875	4.87999	2.65052	1.84115	0.0656003	1	0.0503501	BLOOD_vs_HCC
ZNF649	203.42	3.40187	1.84818	1.84066	0.0656718	0.840408	0.231046	BLOOD_vs_HCC
RAB40C	87.384	4.67143	2.53958	1.83945	0.0658495	1	0.149408	BLOOD_vs_HCC
BCL11B	283.825	-1.85974	1.01112	-1.83928	0.0658734	0.44064	0.700022	BLOOD_vs_HCC
PARP1	1084.43	1.13459	0.617056	1.83871	0.065958	0.194662	2.63024	BLOOD_vs_HCC
ATAT1	97.2713	4.82483	2.62602	1.83731	0.0661635	1	0.0767671	BLOOD_vs_HCC
NUDT14	137.888	-2.64499	1.43979	-1.83706	0.0662006	0.809898	0.250299	BLOOD_vs_HCC
GIGYF1	242.357	2.62369	1.42828	1.83696	0.0662156	0.438963	0.709168	BLOOD_vs_HCC
ZNF684	98.2941	4.84206	2.63772	1.8357	0.0664023	1	0.149408	BLOOD_vs_HCC
UBA1	827.214	1.18735	0.646838	1.83562	0.0664135	0.195482	2.63024	BLOOD_vs_HCC
ENTPD4	736.928	1.3159	0.717161	1.83487	0.0665244	0.182986	2.92829	BLOOD_vs_HCC
ARL6IP1	1194.23	-0.940386	0.512594	-1.83456	0.0665706	0.195679	2.63024	BLOOD_vs_HCC
TSC1	342.164	2.53227	1.38064	1.83413	0.0666354	0.443775	0.700022	BLOOD_vs_HCC
ELMOD3	227.812	2.53044	1.38009	1.83353	0.0667232	0.454018	0.672881	BLOOD_vs_HCC
ST6GAL1	739.979	1.44336	0.787427	1.833	0.0668023	0.183862	2.91363	BLOOD_vs_HCC
ALMS1	277.269	2.20934	1.20574	1.83236	0.0668982	0.693687	0.332526	BLOOD_vs_HCC
C1GALT1C1	192.723	3.32277	1.81463	1.8311	0.0670852	1	0.149408	BLOOD_vs_HCC
SEMA4D	1115.22	1.11036	0.606407	1.83104	0.0670947	0.19621	2.63024	BLOOD_vs_HCC
MIR155HG	96.2589	-3.37368	1.84284	-1.8307	0.0671454	1	0.149408	BLOOD_vs_HCC
APRT	1200.08	-1.05477	0.576165	-1.83068	0.0671481	0.18322	2.9475	BLOOD_vs_HCC
TP53TG1	97.3623	-2.82601	1.54516	-1.82894	0.0674089	0.867906	0.22353	BLOOD_vs_HCC
VPS25	209.936	3.45129	1.88705	1.82893	0.0674098	0.851796	0.231046	BLOOD_vs_HCC
VPS28	1075.38	-0.957577	0.523595	-1.82885	0.0674218	0.196745	2.63024	BLOOD_vs_HCC
POLR2G	602.561	1.38172	0.755782	1.8282	0.0675195	0.184825	2.92032	BLOOD_vs_HCC
PCNX2	196.892	3.35553	1.83566	1.82797	0.0675538	0.8685	0.22353	BLOOD_vs_HCC
HINFP	182.577	3.24216	1.77373	1.82788	0.0675675	0.852849	0.231046	BLOOD_vs_HCC
GOLGA5	241.757	2.61982	1.43343	1.82766	0.0676008	0.443813	0.709168	BLOOD_vs_HCC
ASH1L	1605.25	0.863531	0.472614	1.82714	0.0676788	0.196437	2.64633	BLOOD_vs_HCC
IKZF5	253.345	2.69082	1.4731	1.82664	0.0677544	0.698109	0.332526	BLOOD_vs_HCC
SLC11A2	404.795	2.34813	1.28585	1.82614	0.0678292	0.185441	2.92032	BLOOD_vs_HCC
MEX3B	40.0444	-5.32707	2.91793	-1.82563	0.0679055	1	0.10137	BLOOD_vs_HCC
CMAS	255.758	2.70552	1.48221	1.82533	0.0679506	0.699109	0.332526	BLOOD_vs_HCC
CSGALNACT1	708.869	1.25304	0.686494	1.82527	0.06796	0.184594	2.9475	BLOOD_vs_HCC
LYPLA1	261.502	-2.1315	1.16796	-1.82498	0.0680045	0.454018	0.686119	BLOOD_vs_HCC
SETD3	524.675	1.48216	0.812487	1.82423	0.0681181	0.185491	2.92032	BLOOD_vs_HCC
MRPS35	446.3	1.62647	0.891603	1.82421	0.0681209	0.185491	2.92032	BLOOD_vs_HCC
PCCB	197.73	3.35989	1.84188	1.82416	0.0681275	0.820193	0.250299	BLOOD_vs_HCC
CHMP2A	635.852	1.62106	0.888817	1.82384	0.0681764	0.175873	3.16329	BLOOD_vs_HCC
CMTM8	120.975	-2.93694	1.6111	-1.82295	0.0683117	1	0.0503501	BLOOD_vs_HCC
VAMP3	456.901	2.19075	1.20177	1.82294	0.068313	0.174447	3.20681	BLOOD_vs_HCC
POLR2K	190.34	-2.09334	1.14906	-1.82178	0.068489	0.875348	0.22353	BLOOD_vs_HCC
MRPL33	300.929	-1.67955	0.922094	-1.82146	0.0685376	0.703105	0.332526	BLOOD_vs_HCC
DENND1C	400.024	1.69739	0.932646	1.81997	0.0687637	0.181541	3.0626	BLOOD_vs_HCC
HIST3H2A	87.19	-2.89359	1.59059	-1.81919	0.0688825	0.809515	0.260864	BLOOD_vs_HCC
SUPT3H	278.657	-1.65828	0.911677	-1.81893	0.0689218	0.705686	0.332526	BLOOD_vs_HCC
L3MBTL2	525.708	2.40702	1.32361	1.81852	0.0689847	0.187279	2.92032	BLOOD_vs_HCC
TNRC6C	237.988	2.59637	1.42779	1.81845	0.0689956	0.45213	0.700022	BLOOD_vs_HCC
STX5	257.045	-1.9115	1.05156	-1.81778	0.0690973	0.458793	0.686119	BLOOD_vs_HCC
ADAMTS10	87.9966	4.68051	2.57638	1.81671	0.0692623	1	0.149408	BLOOD_vs_HCC
TMBIM1	1879.85	0.969566	0.533761	1.81648	0.0692969	0.187578	2.91363	BLOOD_vs_HCC
ITGB2	2366.66	0.750012	0.412921	1.81636	0.0693158	0.187279	2.92829	BLOOD_vs_HCC
ZBTB5	293.137	2.9112	1.60286	1.81626	0.0693311	0.459752	0.686119	BLOOD_vs_HCC
REC8	665.809	1.69445	0.933017	1.8161	0.069355	0.20043	2.64633	BLOOD_vs_HCC
KMT2A	1040.72	1.4697	0.81007	1.81428	0.0696339	0.187578	2.92829	BLOOD_vs_HCC
RNF149	1171.48	-0.922619	0.508548	-1.81422	0.0696438	0.200829	2.64633	BLOOD_vs_HCC
CTSS	749.549	1.59258	0.877988	1.81389	0.069694	0.187279	2.9475	BLOOD_vs_HCC
DSE	202.03	-3.57847	1.97368	-1.81309	0.0698173	0.869181	0.230759	BLOOD_vs_HCC
SACS	510.295	1.62672	0.8979	1.81169	0.0700335	0.18362	3.06512	BLOOD_vs_HCC
POP5	360.026	1.81912	1.00423	1.81147	0.0700686	0.17748	3.20681	BLOOD_vs_HCC
MRPL38	86.4895	-2.94038	1.62364	-1.81098	0.0701434	0.887352	0.22353	BLOOD_vs_HCC
GDAP2	236.512	3.6256	2.00269	1.81036	0.0702396	0.463388	0.686119	BLOOD_vs_HCC
CUTC	263.063	2.74796	1.51818	1.81004	0.0702897	0.468834	0.672881	BLOOD_vs_HCC
DHX36	407.561	-1.42576	0.787712	-1.81	0.0702961	0.183862	3.06512	BLOOD_vs_HCC
CYSTM1	111.677	-2.59414	1.43372	-1.80937	0.0703931	0.817564	0.260864	BLOOD_vs_HCC
PGP	78.1536	-2.91779	1.61271	-1.80924	0.0704131	1	0.0503501	BLOOD_vs_HCC
DOCK2	947.159	1.14181	0.631512	1.80805	0.0705984	0.202415	2.64633	BLOOD_vs_HCC
LRRFIP1	2367.43	-0.752201	0.416161	-1.80748	0.070688	0.190204	2.91363	BLOOD_vs_HCC
RBM48	313.893	1.95468	1.08244	1.80581	0.0709482	0.472164	0.672881	BLOOD_vs_HCC
SERTAD3	90.4811	4.72312	2.61558	1.80576	0.0709554	1	0.0503501	BLOOD_vs_HCC
COQ5	181.199	3.23048	1.78927	1.80548	0.0709997	0.876472	0.231046	BLOOD_vs_HCC
CEBPZ	433.849	-2.00664	1.11306	-1.80281	0.0714176	0.185491	3.06512	BLOOD_vs_HCC
CSNK2A1	238.796	2.60115	1.44324	1.8023	0.0714989	0.462651	0.700022	BLOOD_vs_HCC
TCTN3	574.467	1.62716	0.903611	1.80073	0.0717447	0.186004	3.0626	BLOOD_vs_HCC
KEAP1	369.739	1.8608	1.0334	1.80065	0.0717575	0.182986	3.16329	BLOOD_vs_HCC
FDFT1	1461.97	1.13587	0.630908	1.80037	0.0718021	0.191391	2.92829	BLOOD_vs_HCC
LAGE3	111.628	-2.59082	1.43919	-1.80019	0.0718299	1	0.0767671	BLOOD_vs_HCC
VDAC2	440.393	-1.38581	0.769903	-1.79997	0.0718647	0.181455	3.20681	BLOOD_vs_HCC
RCOR1	212.189	-3.49864	1.94388	-1.79982	0.0718885	0.8988	0.22353	BLOOD_vs_HCC
TMEM154	182.548	3.24188	1.80203	1.79901	0.0720167	0.846651	0.250299	BLOOD_vs_HCC
ZNF584	90.7705	4.72762	2.62827	1.79876	0.0720573	0.825901	0.260864	BLOOD_vs_HCC
MAGEH1	248.789	2.66399	1.48151	1.79816	0.0721511	0.461711	0.709168	BLOOD_vs_HCC
RIC1	112.608	-2.55598	1.42183	-1.79766	0.0722306	1	0.149408	BLOOD_vs_HCC
SPRY1	125.831	-4.5777	2.54658	-1.79759	0.0722427	1	0.149408	BLOOD_vs_HCC
STXBP2	340.931	-1.64623	0.915815	-1.79756	0.0722469	0.465176	0.700022	BLOOD_vs_HCC
PPP1CB	1564.62	-0.788189	0.438486	-1.79753	0.0722523	0.191391	2.9475	BLOOD_vs_HCC
PDCD11	362.1	2.17612	1.21091	1.7971	0.0723203	0.182067	3.20681	BLOOD_vs_HCC
TBC1D13	224.578	2.50865	1.39635	1.79658	0.0724019	0.725666	0.332526	BLOOD_vs_HCC
NFATC3	758.08	1.25019	0.695982	1.7963	0.0724468	0.192541	2.92829	BLOOD_vs_HCC
FBXO4	108.199	4.98105	2.77438	1.79537	0.0725946	0.902717	0.22353	BLOOD_vs_HCC
RPL39L	33.6043	-5.1746	2.8825	-1.79518	0.0726253	1	0.10137	BLOOD_vs_HCC
CAPN2	1816.44	1.0314	0.574837	1.79424	0.0727745	0.19327	2.92829	BLOOD_vs_HCC
NPEPPS	497.775	-1.5793	0.880301	-1.79405	0.0728054	0.187578	3.06512	BLOOD_vs_HCC
ZNF445	95.2662	-2.92398	1.63108	-1.79267	0.0730259	0.905158	0.22353	BLOOD_vs_HCC
EEF2K	76.8597	-3.00237	1.67512	-1.79233	0.0730797	0.905332	0.22353	BLOOD_vs_HCC
KIF9	33.1406	-5.46787	3.05089	-1.79222	0.0730981	1	0.10938	BLOOD_vs_HCC
MBTPS1	628.006	1.30723	0.729413	1.79217	0.073106	0.184825	3.16329	BLOOD_vs_HCC
DDX27	509.389	-1.44447	0.806318	-1.79144	0.0732231	0.188129	3.06512	BLOOD_vs_HCC
DLL1	180.005	-3.8525	2.15258	-1.78972	0.0734997	0.908808	0.22353	BLOOD_vs_HCC
HSBP1L1	123.444	-2.50306	1.39864	-1.78964	0.0735125	1	0.0503501	BLOOD_vs_HCC
NPLOC4	182.271	3.23983	1.8107	1.78927	0.0735718	0.908849	0.22353	BLOOD_vs_HCC
ISCA2	176.645	3.19296	1.78468	1.78909	0.0735998	0.893799	0.231046	BLOOD_vs_HCC
CAPN1	572.914	1.62454	0.908157	1.78884	0.073641	0.185491	3.16329	BLOOD_vs_HCC
CLUAP1	177.116	3.19627	1.78752	1.7881	0.0737599	0.895671	0.230759	BLOOD_vs_HCC
ADI1	353.088	1.78891	1.00049	1.78803	0.0737706	0.484053	0.672881	BLOOD_vs_HCC
PDS5A	622.879	1.4358	0.803045	1.78795	0.0737843	0.195482	2.92032	BLOOD_vs_HCC
GPAM	95.9394	4.80439	2.68744	1.78772	0.0738216	0.838202	0.260864	BLOOD_vs_HCC
MOB4	311.06	-1.58042	0.884458	-1.78688	0.0739574	0.478902	0.686119	BLOOD_vs_HCC
ZNF671	228.359	2.53321	1.41782	1.78669	0.0739872	0.478902	0.686119	BLOOD_vs_HCC
PEX11B	283.706	2.24578	1.25751	1.78589	0.0741173	0.473227	0.700022	BLOOD_vs_HCC
TRIP12	975.981	1.36412	0.764008	1.78547	0.0741845	0.195016	2.9475	BLOOD_vs_HCC
CD83	144.735	-4.1818	2.34337	-1.78453	0.074338	0.899515	0.230759	BLOOD_vs_HCC
NUP160	383.604	1.92026	1.07615	1.78439	0.0743609	0.190204	3.0626	BLOOD_vs_HCC
PLP2	1687.82	-0.850741	0.476984	-1.78358	0.0744913	0.211251	2.63024	BLOOD_vs_HCC
ABRACL	644.53	-1.20151	0.673775	-1.78325	0.074546	0.19621	2.92032	BLOOD_vs_HCC
CHRNB1	82.986	4.59657	2.57794	1.78304	0.0745803	1	0.0767671	BLOOD_vs_HCC
MRPL49	370.482	1.86383	1.04571	1.78236	0.0746902	0.190623	3.06512	BLOOD_vs_HCC
ZFP62	179.668	3.21813	1.80607	1.78184	0.0747753	1	0.149408	BLOOD_vs_HCC
ITGB7	882.587	-1.04913	0.589047	-1.78106	0.0749023	0.211251	2.64633	BLOOD_vs_HCC
NPAT	488.168	1.5566	0.874083	1.78083	0.0749399	0.191277	3.0626	BLOOD_vs_HCC
SYNGR2	620.59	-1.24085	0.696984	-1.78031	0.0750247	0.185899	3.20681	BLOOD_vs_HCC
LYRM2	157.96	-2.11076	1.18631	-1.77927	0.0751958	0.903783	0.230759	BLOOD_vs_HCC
PCBD1	142.154	-2.24439	1.26174	-1.77881	0.0752709	0.919758	0.22353	BLOOD_vs_HCC
TRAPPC12	278.832	2.83571	1.5943	1.77865	0.0752971	0.743245	0.332526	BLOOD_vs_HCC
N4BP2L2	1933.27	0.942268	0.529867	1.77831	0.0753526	0.211576	2.64633	BLOOD_vs_HCC
PRKAR1A	937.815	1.12589	0.633378	1.77759	0.0754715	0.212033	2.63024	BLOOD_vs_HCC
DPYD	642.434	1.8065	1.01646	1.77725	0.0755269	0.192082	3.06512	BLOOD_vs_HCC
PPP3CA	671.571	-1.09777	0.617711	-1.77716	0.0755427	0.21172	2.64633	BLOOD_vs_HCC
RANGRF	141.594	-2.25434	1.26875	-1.77682	0.0755975	0.8685	0.250299	BLOOD_vs_HCC
GNPAT	539.538	1.52788	0.860504	1.77556	0.0758056	0.18844	3.16329	BLOOD_vs_HCC
SUPT20H	449.792	2.1665	1.22066	1.77486	0.0759218	0.187279	3.20681	BLOOD_vs_HCC
NDUFS3	342.947	2.09226	1.17935	1.77408	0.0760495	0.477453	0.709168	BLOOD_vs_HCC
MRPL18	407.287	-1.42969	0.806001	-1.7738	0.0760955	0.187568	3.20681	BLOOD_vs_HCC
DAP3	850.286	1.232	0.694674	1.77349	0.0761471	0.212095	2.64633	BLOOD_vs_HCC
PLEKHO2	180.525	3.22548	1.81984	1.7724	0.0763283	0.910059	0.231046	BLOOD_vs_HCC
MSMO1	282.577	-1.7448	0.984465	-1.77233	0.0763399	0.750625	0.332526	BLOOD_vs_HCC
CRYZ	229.88	2.54345	1.43514	1.77226	0.0763511	0.750625	0.332526	BLOOD_vs_HCC
PTTG1	69.8072	-3.60757	2.03573	-1.77212	0.0763746	1	0.10938	BLOOD_vs_HCC
WSB1	923.623	-0.981159	0.553744	-1.77186	0.0764171	0.199718	2.92829	BLOOD_vs_HCC
LDLRAP1	189.961	3.30139	1.86348	1.77162	0.0764572	1	0.149408	BLOOD_vs_HCC
GLIDR	40.5599	-5.07543	2.86488	-1.7716	0.0764607	1	0.10938	BLOOD_vs_HCC
GTF3C5	352.494	1.78648	1.00961	1.76948	0.0768145	0.491027	0.686119	BLOOD_vs_HCC
PCYT2	199.235	3.37074	1.9059	1.76858	0.0769638	0.914996	0.231046	BLOOD_vs_HCC
SPEF2	82.0612	4.5802	2.59041	1.76814	0.0770381	1	0.149408	BLOOD_vs_HCC
LUC7L	1120.55	1.41751	0.801714	1.76809	0.0770451	0.200829	2.92829	BLOOD_vs_HCC
SERTAD1	179.087	-3.56352	2.01612	-1.76751	0.0771431	0.877932	0.250299	BLOOD_vs_HCC
ABCA2	179.3	3.21413	1.81849	1.76747	0.0771496	0.9168	0.230759	BLOOD_vs_HCC
GRAMD1B	104.742	-3.87174	2.19077	-1.7673	0.0771783	0.936907	0.22353	BLOOD_vs_HCC
TRAPPC13	174.524	3.17434	1.79656	1.7669	0.0772444	0.917355	0.230759	BLOOD_vs_HCC
FOCAD	173.498	3.16541	1.79316	1.76527	0.0775185	0.918708	0.230759	BLOOD_vs_HCC
CDK13	522.894	1.47642	0.83686	1.76424	0.0776915	0.195715	3.0626	BLOOD_vs_HCC
ZNF436	92.8312	4.76014	2.69871	1.76386	0.0777562	0.942567	0.22353	BLOOD_vs_HCC
SDF2L1	171.356	-2.49171	1.41275	-1.76373	0.0777775	0.919878	0.230759	BLOOD_vs_HCC
COL4A3	97.3477	4.8271	2.73782	1.76312	0.0778806	0.943832	0.22353	BLOOD_vs_HCC
ATP6AP1	874.496	1.18424	0.671691	1.76307	0.0778885	0.202104	2.92829	BLOOD_vs_HCC
PUF60	754.052	1.24057	0.703784	1.76272	0.0779484	0.2025	2.91363	BLOOD_vs_HCC
MUL1	190.751	3.30602	1.87593	1.76234	0.0780119	0.884067	0.250299	BLOOD_vs_HCC
U2AF1	48.833	-4.59653	2.60827	-1.76229	0.0780196	1	0.110809	BLOOD_vs_HCC
RNF138	254.473	-1.94501	1.10543	-1.75951	0.0784903	0.486438	0.709168	BLOOD_vs_HCC
CLK1	1475.91	-0.793919	0.451246	-1.75939	0.0785105	0.203507	2.91363	BLOOD_vs_HCC
RAB15	81.1033	4.56483	2.59474	1.75926	0.0785329	1	0.149408	BLOOD_vs_HCC
CUL9	88.3123	4.68792	2.66513	1.75898	0.0785806	0.950372	0.22353	BLOOD_vs_HCC
ESYT2	531.229	1.50173	0.854434	1.75757	0.0788207	0.197089	3.06512	BLOOD_vs_HCC
JMJD6	373.934	1.87878	1.06932	1.75698	0.0789212	0.19736	3.0626	BLOOD_vs_HCC
KDELR1	357.297	-1.71173	0.974623	-1.7563	0.0790369	0.192082	3.20681	BLOOD_vs_HCC
MTX1	133.402	-2.20364	1.25472	-1.75628	0.0790408	0.955193	0.22353	BLOOD_vs_HCC
GART	392.88	1.66888	0.950393	1.75599	0.0790898	0.192082	3.20681	BLOOD_vs_HCC
SNX19	398.318	1.6911	0.963474	1.75521	0.0792233	0.204369	2.92032	BLOOD_vs_HCC
NDUFAF2	87.8147	-2.86554	1.63265	-1.75515	0.079234	0.871154	0.260864	BLOOD_vs_HCC
BCL2L11	194.262	-2.02739	1.15536	-1.75476	0.0793004	1	0.149408	BLOOD_vs_HCC
UNC50	443.317	1.61489	0.921154	1.75312	0.0795821	0.205003	2.92032	BLOOD_vs_HCC
PATJ	799.777	1.23222	0.703131	1.75248	0.0796908	0.20487	2.92829	BLOOD_vs_HCC
CSDE1	2574.58	0.713683	0.407307	1.7522	0.0797394	0.203949	2.9475	BLOOD_vs_HCC
DHRS4	99.898	-2.69627	1.53911	-1.75184	0.0798014	0.87496	0.260864	BLOOD_vs_HCC
PKN1	458.179	1.91095	1.09246	1.74923	0.0802521	0.195715	3.16329	BLOOD_vs_HCC
CSE1L	330.53	2.03626	1.16424	1.74901	0.0802892	0.770854	0.332526	BLOOD_vs_HCC
CLDN15	89.0107	4.69633	2.68549	1.74878	0.0803295	1	0.0767671	BLOOD_vs_HCC
LSM2	303.032	-1.53992	0.881148	-1.74763	0.0805283	0.495777	0.709168	BLOOD_vs_HCC
DDX55	264.002	2.13397	1.22126	1.74736	0.0805746	0.495857	0.709168	BLOOD_vs_HCC
DNAJC5	222.396	2.4937	1.42786	1.74646	0.0807312	0.501247	0.700022	BLOOD_vs_HCC
XPOT	482.234	1.53569	0.879678	1.74574	0.0808569	0.201162	3.06512	BLOOD_vs_HCC
HBP1	757.362	1.24863	0.715274	1.74567	0.0808686	0.221062	2.64633	BLOOD_vs_HCC
FOXJ3	388.687	1.65193	0.946462	1.74538	0.0809192	0.201337	3.0626	BLOOD_vs_HCC
PIP4K2C	215.381	2.44491	1.4016	1.74437	0.0810954	0.949123	0.231046	BLOOD_vs_HCC
NGDN	721.59	1.40243	0.804195	1.7439	0.0811772	0.208099	2.92829	BLOOD_vs_HCC
PHF1	545.554	-1.39278	0.798747	-1.74371	0.0812105	0.201772	3.0626	BLOOD_vs_HCC
UQCC1	208.762	3.44039	1.97323	1.74353	0.0812404	1	0.149408	BLOOD_vs_HCC
XRN2	1078.91	0.986971	0.566078	1.74352	0.0812422	0.221508	2.64633	BLOOD_vs_HCC
LGALS8	516.772	1.64798	0.94534	1.74326	0.0812879	0.201819	3.0626	BLOOD_vs_HCC
SUSD3	374.149	2.22671	1.27738	1.74319	0.0813006	0.195715	3.20681	BLOOD_vs_HCC
COPS4	364.295	1.83892	1.05497	1.7431	0.081316	0.197089	3.16329	BLOOD_vs_HCC
SAMD10	83.1687	4.59873	2.63859	1.74287	0.0813558	1	0.149408	BLOOD_vs_HCC
RWDD2A	90.6245	4.72402	2.7114	1.74228	0.0814594	0.884349	0.260864	BLOOD_vs_HCC
POLE3	785.679	1.30792	0.750804	1.74203	0.0815035	0.208788	2.92829	BLOOD_vs_HCC
DHRS3	196.992	-3.48079	1.99897	-1.74129	0.0816325	0.979374	0.22353	BLOOD_vs_HCC
FTSJ1	481.142	1.98756	1.14165	1.74095	0.081693	0.202368	3.06512	BLOOD_vs_HCC
ISY1	173.856	-2.00059	1.14915	-1.74093	0.0816955	0.979791	0.22353	BLOOD_vs_HCC
APOL2	360.668	1.82165	1.04642	1.74085	0.0817098	0.209442	2.92032	BLOOD_vs_HCC
VPS72	172.834	3.16088	1.81576	1.7408	0.0817181	0.955193	0.231046	BLOOD_vs_HCC
CALU	399.809	1.69736	0.975115	1.74067	0.0817408	0.19621	3.20681	BLOOD_vs_HCC
NDUFV1	1056.35	1.09073	0.626635	1.74061	0.0817513	0.209126	2.92829	BLOOD_vs_HCC
RNF7	575.818	-1.25215	0.719536	-1.74022	0.0818208	0.2025	3.0626	BLOOD_vs_HCC
RAB8B	570.333	-1.34049	0.770394	-1.74001	0.0818576	0.19621	3.20681	BLOOD_vs_HCC
AHCYL1	312.786	1.94978	1.12068	1.73982	0.08189	0.501679	0.709168	BLOOD_vs_HCC
ITK	2222.51	-0.741125	0.425997	-1.73974	0.0819039	0.224373	2.63024	BLOOD_vs_HCC
MAU2	367.162	1.85124	1.0641	1.73972	0.0819077	0.2025	3.0626	BLOOD_vs_HCC
CHRNE	73.7598	-5.23171	3.0073	-1.73967	0.0819169	1	0.164052	BLOOD_vs_HCC
FOS	6695.31	-3.43053	1.97255	-1.73913	0.0820112	0.209495	2.92829	BLOOD_vs_HCC
PPIL3	168.955	3.12625	1.79822	1.73852	0.0821184	1	0.149408	BLOOD_vs_HCC
TANC2	391.49	1.66347	0.957638	1.73705	0.0823782	0.210709	2.92032	BLOOD_vs_HCC
AMZ2	768.53	1.27157	0.73238	1.73622	0.0825247	0.224393	2.64633	BLOOD_vs_HCC
GFER	64.9104	-3.28815	1.89395	-1.73614	0.0825397	1	0.110809	BLOOD_vs_HCC
TUBGCP6	347.136	1.76153	1.01473	1.73596	0.0825703	0.522772	0.672881	BLOOD_vs_HCC
CYP2E1	289.805	2.27652	1.31149	1.73583	0.082594	0.522772	0.672881	BLOOD_vs_HCC
KIF21B	347.766	1.76437	1.01686	1.73512	0.0827204	0.522941	0.672881	BLOOD_vs_HCC
SDCBP	958.046	-1.09045	0.628484	-1.73505	0.0827313	0.211576	2.91363	BLOOD_vs_HCC
DPH5	221.315	2.4853	1.43288	1.73448	0.0828335	0.509397	0.700022	BLOOD_vs_HCC
PCNX1	1226.72	1.07287	0.618556	1.73447	0.082834	0.224917	2.64633	BLOOD_vs_HCC
GOLPH3	618.252	1.281	0.738618	1.73433	0.08286	0.203943	3.06512	BLOOD_vs_HCC
TCP11L2	246.458	2.64877	1.52763	1.73391	0.0829344	0.784593	0.332526	BLOOD_vs_HCC
RAB11FIP1	713.944	-1.7649	1.01807	-1.73358	0.0829929	0.211576	2.91363	BLOOD_vs_HCC
CREB3L2	558.254	1.58133	0.912577	1.73282	0.0831276	0.211576	2.92032	BLOOD_vs_HCC
MAST3	213.136	2.42889	1.40229	1.73208	0.0832589	0.995267	0.22353	BLOOD_vs_HCC
ZNF823	80.78	4.559	2.63278	1.73163	0.0833391	0.995974	0.22353	BLOOD_vs_HCC
U2AF2	189.041	-2.12248	1.22643	-1.73062	0.0835197	0.971544	0.231046	BLOOD_vs_HCC
ZSCAN22	79.7274	4.54031	2.6242	1.73017	0.0835998	0.998083	0.22353	BLOOD_vs_HCC
OXCT1	322.483	1.99725	1.15447	1.73001	0.0836282	0.508159	0.709168	BLOOD_vs_HCC
FAM168A	94.0505	4.77566	2.7609	1.72975	0.0836756	0.998485	0.22353	BLOOD_vs_HCC
MRPS14	80.6929	4.5579	2.63564	1.72933	0.08375	1	0.149408	BLOOD_vs_HCC
[truncated: 8,593 more rows]

## Sheet: ILC3_c1
gene_id	baseMean	log2FoldChange	lfcSE	stat	pvalue	padj	weight	comparison
PTMA	1275.54	-2.64897	0.117459	-22.5523	1.2744e-112	1.67046e-108	0.86475	COLON
ZFP36L2	2651.25	-1.77248	0.0824391	-21.5005	1.54023e-102	8.72927e-99	1	COLON
RPL36A	335.651	-2.51085	0.121668	-20.6369	1.27982e-94	5.5919e-91	0.86475	COLON
HLA-A	3562.81	-1.14972	0.0646225	-17.7913	8.2538e-71	2.33892e-67	1	COLON
YBX1	300.272	-2.84676	0.16227	-17.5434	6.68519e-69	1.51553e-65	1	COLON
FTH1	1208.6	-4.07703	0.237507	-17.166	4.77411e-66	9.01909e-63	1	COLON
UBC	1190	-2.03093	0.118947	-17.0742	2.30893e-65	3.73882e-62	1	COLON
CXCR4	4221.39	1.16465	0.0709294	16.4199	1.37757e-60	1.95184e-57	1	COLON
RPS3A	507.605	-2.35421	0.147802	-15.9281	4.04446e-57	5.09378e-54	1	COLON
EEF1A1	7588.03	-1.69277	0.110638	-15.3001	7.63128e-53	1.0003e-49	0.86475	COLON
PNKP	53.518	-4.6268	0.308658	-14.99	8.53116e-51	8.79097e-48	1	COLON
ARPC1B	151.205	-2.18302	0.147112	-14.8392	8.16949e-50	7.71676e-47	1	COLON
RPL22	492.179	-1.78238	0.123993	-14.3749	7.4359e-47	6.48354e-44	1	COLON
RPS26	322.252	-2.92887	0.204153	-14.3464	1.12154e-46	9.08044e-44	1	COLON
MTRNR2L8	1767.43	-4.49902	0.315369	-14.2659	3.56852e-46	3.11837e-43	0.86475	COLON
HLA-C	3066.37	-1.41987	0.1027	-13.8254	1.79091e-43	1.26875e-40	1	COLON
JUND	1792.42	-2.16794	0.156877	-13.8193	1.94976e-43	1.30003e-40	1	COLON
SPSB3	81.1352	-3.41721	0.248438	-13.7548	4.76762e-43	3.13216e-40	0.958533	COLON
ICOS	682.819	2.33593	0.170953	13.6642	1.66112e-42	1.14599e-39	0.86475	COLON
RBMS1	510.718	-1.26982	0.0936802	-13.5549	7.41414e-42	4.20196e-39	1	COLON
JUN	2160.16	-1.29271	0.100334	-12.884	5.53715e-38	2.98874e-35	1	COLON
RPL18A	688.324	-2.74965	0.214092	-12.8433	9.37387e-38	4.82967e-35	1	COLON
HMGB1	344.438	-1.37488	0.107567	-12.7817	2.07612e-37	1.02317e-34	1	COLON
MID1IP1	60.7641	-2.81523	0.226305	-12.44	1.58588e-35	7.28928e-33	1.02753	COLON
PABPC1	2569.06	-1.11146	0.0893563	-12.4385	1.61432e-35	7.31935e-33	1	COLON
DDX39B	73.763	-3.68006	0.296123	-12.4275	1.85437e-35	8.43406e-33	0.958533	COLON
IL2RG	664.74	-1.35277	0.109469	-12.3576	4.43085e-35	1.86013e-32	1	COLON
RPS28	1051.87	-3.35396	0.281249	-11.9252	8.74359e-33	3.53959e-30	1	COLON
SNRNP70	323.669	-1.79602	0.151883	-11.825	2.89859e-32	1.13295e-29	1	COLON
WAS	134.273	-2.67168	0.226472	-11.7969	4.04759e-32	1.52931e-29	1	COLON
HLA-E	1529.91	-0.821334	0.0700415	-11.7264	9.33582e-32	3.4136e-29	1	COLON
ATP2B4	147.857	1.68001	0.143434	11.7128	1.09556e-31	3.88067e-29	1	COLON
RPSA	593.848	-1.4626	0.126274	-11.5828	5.03724e-31	1.73022e-28	1	COLON
PCBP1	375.069	-1.29397	0.112194	-11.5334	8.95459e-31	2.9853e-28	1	COLON
HNRNPL	174.731	-1.51523	0.133152	-11.3797	5.27955e-30	1.70982e-27	1	COLON
LY6E	122.662	-2.02334	0.182347	-11.0961	1.31068e-28	4.77227e-26	0.86475	COLON
EPC1	282.24	-1.00263	0.0905185	-11.0765	1.63082e-28	5.64171e-26	0.86475	COLON
VWA5A	231.693	1.77013	0.160001	11.0632	1.89136e-28	5.64171e-26	1	COLON
MED4	32.8973	-4.34117	0.399563	-10.8648	1.69578e-27	3.88007e-25	1.27024	COLON
MZT2B	77.3611	-2.73017	0.25193	-10.837	2.29868e-27	6.51389e-25	1	COLON
MIF	122.725	-3.14581	0.291524	-10.7909	3.8003e-27	1.05064e-24	1	COLON
ATF5	35.3876	-2.58189	0.240007	-10.7575	5.46026e-27	1.47362e-24	1	COLON
LY9	73.2231	3.02258	0.281797	10.7261	7.67797e-27	2.02395e-24	1	COLON
H3F3A	537.399	-3.04092	0.283578	-10.7234	7.90329e-27	2.03599e-24	1	COLON
GATA3	351.145	-1.52494	0.143034	-10.6614	1.5432e-26	3.88715e-24	1	COLON
ANKHD1	71.1374	-1.89106	0.177815	-10.635	2.04934e-26	5.26831e-24	0.958533	COLON
BTG1	2269.07	-1.14049	0.108768	-10.4855	1.00684e-25	2.4282e-23	1	COLON
RPS7	664.761	-2.26969	0.218463	-10.3894	2.7722e-25	6.54644e-23	1	COLON
RHOF	79.3767	-2.22494	0.215951	-10.303	6.83098e-25	1.58019e-22	1	COLON
FOXN3	278.269	-1.18215	0.115412	-10.2428	1.27447e-24	2.88922e-22	1	COLON
NR4A2	1268.73	1.45363	0.142627	10.1918	2.1568e-24	5.54332e-22	0.86475	COLON
SH2D2A	41.7479	-2.08647	0.205078	-10.174	2.58982e-24	5.6453e-22	1	COLON
H3F3B	1640.35	-0.852985	0.0849284	-10.0436	9.80472e-24	2.09692e-21	1	COLON
FOS	9217.22	1.42954	0.143801	9.94113	2.75692e-23	6.69208e-21	0.86475	COLON
EEF1G	122.008	-3.79779	0.382751	-9.92237	3.32766e-23	7.78899e-21	0.86475	COLON
HES4	19.7684	-4.08585	0.412374	-9.90813	3.83762e-23	7.78899e-21	1	COLON
RTN4	355.457	-1.27218	0.128702	-9.8847	4.85038e-23	9.64545e-21	1	COLON
ARL6IP4	42.8625	-3.40011	0.345224	-9.84901	6.9223e-23	1.35283e-20	1	COLON
CHST12	69.3879	-2.9298	0.29922	-9.79148	1.22489e-22	2.35324e-20	1	COLON
DDT	61.974	-3.62184	0.370384	-9.77861	1.39107e-22	2.62796e-20	1	COLON
EEF1D	318.641	-1.58213	0.163023	-9.70495	2.87204e-22	5.33681e-20	1	COLON
ILK	61.369	-3.03312	0.31645	-9.58484	9.26032e-22	1.693e-19	1	COLON
NR4A3	391.026	1.3274	0.13878	9.56474	1.12487e-21	2.30385e-19	0.86475	COLON
RPL23A	873.253	-2.2922	0.239848	-9.5569	1.21339e-21	2.18313e-19	1	COLON
DCAF7	123.784	1.79891	0.188665	9.53493	1.49985e-21	2.61551e-19	1	COLON
GNAI3	145.854	1.32433	0.139542	9.49056	2.29795e-21	4.42958e-19	0.86475	COLON
HOTAIRM1	66.4323	-1.84615	0.194533	-9.49016	2.30675e-21	4.11276e-19	0.958533	COLON
RPL21	296.775	-2.28137	0.240532	-9.48469	2.43101e-21	4.11276e-19	1	COLON
HNRNPA0	306.622	-0.947152	0.100136	-9.45867	3.11871e-21	5.12327e-19	1	COLON
TCF25	293.039	-1.17159	0.124976	-9.37451	6.94967e-21	1.12535e-18	1	COLON
ZC3HAV1	394.1	-1.53949	0.165008	-9.32981	1.06057e-20	1.69318e-18	1	COLON
LMO4	221.202	-1.67552	0.180112	-9.30266	1.36972e-20	2.15636e-18	1	COLON
MGAT2	29.6568	-3.57837	0.384911	-9.29662	1.44985e-20	2.25124e-18	1	COLON
NPIPB5	96.7094	-6.51236	0.701007	-9.29001	1.54273e-20	2.36309e-18	1	COLON
RPS2	1416.94	-2.0484	0.222628	-9.20099	3.54668e-20	5.36022e-18	1	COLON
CKLF	126.322	-2.57391	0.279867	-9.19689	3.68473e-20	5.49559e-18	1	COLON
RPL10	2273.5	-1.59619	0.173854	-9.18116	4.26465e-20	6.2779e-18	1	COLON
PCBP2	357.426	-1.27903	0.139927	-9.14075	6.20206e-20	1.01619e-17	0.86475	COLON
BRD8	274.846	1.72967	0.18934	9.13523	6.52701e-20	9.48508e-18	1	COLON
CITED2	374.93	-2.00966	0.220106	-9.13043	6.8229e-20	9.78957e-18	1	COLON
RPL41	2957.79	-2.66127	0.29186	-9.11832	7.63001e-20	1.06773e-17	1	COLON
ABCA1	89.7988	1.91917	0.211209	9.08661	1.02175e-19	1.41239e-17	1	COLON
IRS2	93.5996	-1.80925	0.199151	-9.08478	1.03912e-19	1.41908e-17	1	COLON
RPS15A	1318.02	-2.2517	0.249333	-9.03088	1.70296e-19	2.29799e-17	1	COLON
MAP2K7	68.2405	-2.55536	0.283501	-9.01358	1.99439e-19	2.65958e-17	1	COLON
NEAT1	835.745	-1.31093	0.145547	-9.00694	2.11891e-19	2.79277e-17	1	COLON
CD7	295.759	-2.43422	0.270318	-9.00505	2.15564e-19	2.80853e-17	1	COLON
NKG7	45.0025	-4.03266	0.448776	-8.98591	2.5661e-19	3.30531e-17	1	COLON
B4GALT5	93.985	-1.40123	0.156257	-8.96748	3.03365e-19	4.03079e-17	0.958533	COLON
TIAL1	117.963	-1.26663	0.141585	-8.94608	3.68319e-19	4.63877e-17	1	COLON
RPS8	1111.31	-1.87307	0.209856	-8.92549	4.43723e-19	5.52703e-17	1	COLON
SOCS1	133.555	-2.33936	0.262955	-8.89646	5.76574e-19	7.10377e-17	1	COLON
EMC10	80.9851	-1.5399	0.173623	-8.86924	7.36443e-19	8.97589e-17	1	COLON
RPL39	1260.31	-2.84196	0.324002	-8.77143	1.76409e-18	2.43404e-16	0.86475	COLON
ZBTB16	308.906	-1.01927	0.116219	-8.77027	1.7824e-18	2.14931e-16	1	COLON
PABPC4	269.606	-1.0594	0.121102	-8.74796	2.17239e-18	2.565e-16	1	COLON
PAPSS1	88.9241	1.95768	0.224711	8.71199	2.98597e-18	3.48928e-16	1	COLON
FAM133B	91.3761	-2.2436	0.25798	-8.69679	3.4139e-18	4.11945e-16	0.958533	COLON
UBB	739.948	-1.42999	0.165135	-8.65957	4.7356e-18	5.42202e-16	1	COLON
CCZ1	34.1338	-2.45199	0.284278	-8.62531	6.39181e-18	7.24512e-16	1	COLON
HNRNPA3	268.882	-0.943698	0.109432	-8.6236	6.48795e-18	8.42009e-16	0.86475	COLON
ARHGDIA	129.258	-1.98174	0.230682	-8.59076	8.63949e-18	9.60084e-16	1	COLON
C12orf57	199.234	-2.75082	0.32025	-8.58959	8.72766e-18	9.60467e-16	1	COLON
PPDPF	138.477	-3.5983	0.419065	-8.58649	8.9669e-18	9.77305e-16	1	COLON
POMT1	69.976	2.13712	0.249055	8.58092	9.41136e-18	1.01598e-15	1	COLON
USP15	295.81	-0.95443	0.111564	-8.55503	1.17838e-17	1.26009e-15	1	COLON
MAZ	61.4365	-2.01252	0.236142	-8.5225	1.56152e-17	1.60986e-15	1.02753	COLON
POLR2J3	125.063	-3.17272	0.373013	-8.50565	1.80582e-17	2.1917e-15	0.86475	COLON
LETMD1	57.5248	1.976	0.23611	8.36897	5.81264e-17	6.04461e-15	1	COLON
RAP1B	381.94	-1.18133	0.141383	-8.35555	6.51287e-17	6.71122e-15	1	COLON
MIDN	95.0213	-1.73365	0.207575	-8.35194	6.71487e-17	7.15367e-15	0.958533	COLON
SUMO2	161.563	-1.25141	0.150135	-8.33524	7.73433e-17	7.82756e-15	1	COLON
FBXO11	87.5022	-5.20667	0.628582	-8.28319	1.19918e-16	1.20289e-14	1	COLON
RALGAPA1	107.087	-1.59251	0.192332	-8.27998	1.23197e-16	1.22495e-14	1	COLON
NORAD	182.021	-1.13207	0.136922	-8.26798	1.36245e-16	1.53955e-14	0.86475	COLON
ZFAND3	50.7994	-1.49069	0.180433	-8.26176	1.43543e-16	1.41484e-14	1	COLON
KLC1	53.3879	-6.47712	0.787725	-8.22256	1.99212e-16	1.92997e-14	1	COLON
NFKB2	183.758	-1.38493	0.169386	-8.17616	2.93025e-16	2.81478e-14	1	COLON
NUS1	35.7378	-1.8982	0.232545	-8.16272	3.27551e-16	3.11999e-14	1	COLON
CNOT6L	149.811	-1.20852	0.148286	-8.14993	3.64132e-16	3.43953e-14	1	COLON
COL4A4	76.906	2.94847	0.362591	8.13167	4.23404e-16	4.10402e-14	0.958533	COLON
RPL7L1	94.6952	-1.63264	0.200784	-8.13129	4.24729e-16	3.97876e-14	1	COLON
NPM1	406.164	-1.03128	0.127029	-8.11847	4.72082e-16	4.9903e-14	0.86475	COLON
LRRFIP1	432.222	-0.942733	0.116351	-8.1025	5.38393e-16	4.96153e-14	1	COLON
TNFRSF4	138.502	-2.03985	0.252157	-8.08959	5.98654e-16	5.42859e-14	1	COLON
RPL14	967.284	-1.85345	0.229861	-8.06338	7.42117e-16	6.67611e-14	1	COLON
PA2G4	109.111	-1.22456	0.152016	-8.05546	7.91817e-16	7.06712e-14	1	COLON
IL23R	367.331	1.13634	0.141307	8.04165	8.86388e-16	7.84938e-14	1	COLON
PRDM1	41.6418	-2.97563	0.370138	-8.03925	9.03903e-16	7.94244e-14	1	COLON
C15orf39	99.9633	-1.25588	0.156375	-8.03118	9.65433e-16	8.41784e-14	1	COLON
EIF5B	160.802	-1.00129	0.124824	-8.02156	1.0441e-15	1.02901e-13	0.86475	COLON
CELF1	237.96	1.12836	0.140881	8.00928	1.15384e-15	9.98379e-14	1	COLON
PTGER3	50.6263	-2.16613	0.270571	-8.00579	1.18703e-15	1.01932e-13	1	COLON
RASSF8	59.7324	-1.70247	0.212825	-7.99938	1.25043e-15	1.05607e-13	1	COLON
CCDC85B	38.1679	-2.07956	0.259988	-7.99866	1.25778e-15	1.05607e-13	1	COLON
RAD23B	47.0708	-1.59273	0.200042	-7.96198	1.69304e-15	1.41108e-13	1	COLON
TMA7	177.363	-4.4291	0.558216	-7.93439	2.11537e-15	1.7502e-13	1	COLON
HNRNPA1	794.184	-1.13824	0.143616	-7.92561	2.2703e-15	1.86477e-13	1	COLON
VAMP2	300.153	-1.15139	0.145509	-7.9128	2.51659e-15	2.35621e-13	0.86475	COLON
MAPKAPK2	195.342	-1.67838	0.212494	-7.89847	2.82344e-15	2.30242e-13	1	COLON
FKBP8	71.4404	-1.57186	0.20029	-7.84794	4.22941e-15	3.40003e-13	1	COLON
KPNA6	135.399	1.82129	0.232302	7.84019	4.49859e-15	3.59096e-13	1	COLON
PLXNC1	183.024	1.2897	0.164904	7.82088	5.24549e-15	4.15788e-13	1	COLON
PRRC2C	641.597	-0.731876	0.093639	-7.81593	5.456e-15	4.2947e-13	1	COLON
TOP1	98.8008	-1.34438	0.172448	-7.79584	6.39824e-15	5.00166e-13	1	COLON
CUL3	205.323	-1.03005	0.132325	-7.78424	7.01321e-15	6.21135e-13	0.86475	COLON
EPN1	40.4025	-2.17152	0.279206	-7.77747	7.39878e-15	5.74419e-13	1	COLON
RGPD5	14.2378	-4.63265	0.595759	-7.77604	7.48272e-15	5.76984e-13	1	COLON
SLFN12L	36.2286	-5.37836	0.694258	-7.74691	9.41519e-15	7.1625e-13	1	COLON
MED17	66.9275	-2.03074	0.262573	-7.73399	1.04228e-14	7.87613e-13	1	COLON
RPL7	590.475	-2.30404	0.297946	-7.73307	1.04983e-14	7.88067e-13	1	COLON
PNRC1	664.256	-0.974551	0.126057	-7.73102	1.06686e-14	7.95582e-13	1	COLON
RPL29	614.386	-1.59609	0.206613	-7.72501	1.11846e-14	8.28609e-13	1	COLON
JARID2	223.966	-1.2754	0.165499	-7.70641	1.2941e-14	1.09438e-12	0.86475	COLON
EMP3	39.9171	-2.60699	0.33879	-7.69502	1.41469e-14	1.04127e-12	1	COLON
KCTD7	73.1108	1.97889	0.257283	7.69152	1.45396e-14	1.10216e-12	0.958533	COLON
RPL28	1411.03	-1.9829	0.25797	-7.68658	1.51125e-14	1.25375e-12	0.86475	COLON
CHMP4B	51.9303	-2.76277	0.359604	-7.68283	1.55611e-14	1.12347e-12	1	COLON
BATF	27.5459	-2.14597	0.280265	-7.65694	1.9042e-14	1.35749e-12	1	COLON
LARS	110.748	1.41533	0.184844	7.65687	1.90514e-14	1.39068e-12	0.958533	COLON
SYTL3	240.218	-1.43602	0.187565	-7.65612	1.91639e-14	1.35764e-12	1	COLON
PTGER4	661.731	0.865102	0.113037	7.65325	1.95967e-14	1.37968e-12	1	COLON
RNASET2	312.667	-0.800493	0.104658	-7.64866	2.03082e-14	1.41223e-12	1	COLON
APEX1	105.812	2.36232	0.309451	7.63391	2.27735e-14	1.57401e-12	1	COLON
EIF1AX	204.507	-1.89591	0.24846	-7.63067	2.33535e-14	1.83301e-12	0.86475	COLON
DGKA	246.252	1.39355	0.182686	7.62812	2.38209e-14	1.85857e-12	0.86475	COLON
CDC42	370.753	-1.14251	0.149936	-7.61997	2.53735e-14	1.74308e-12	1	COLON
ACAA1	51.725	-4.97353	0.653256	-7.61345	2.66875e-14	1.82231e-12	1	COLON
TCEA1	73.6283	-1.18757	0.15621	-7.60235	2.90791e-14	2.03474e-12	0.958533	COLON
PCSK7	159.248	-1.67743	0.220966	-7.59136	3.16575e-14	2.11081e-12	1	COLON
BIRC3	897.568	-0.682945	0.0900707	-7.58232	3.39421e-14	2.24991e-12	1	COLON
MALT1	86.6766	-1.21834	0.161281	-7.5541	4.21777e-14	2.77956e-12	1	COLON
UBE2W	37.5958	-6.32436	0.839758	-7.53117	5.02864e-14	3.29477e-12	1	COLON
RPS27	1016.95	-2.02241	0.268588	-7.5298	5.08163e-14	3.80624e-12	0.86475	COLON
RPL7A	849.252	-1.38286	0.18389	-7.52005	5.47572e-14	3.56709e-12	1	COLON
KLF13	159.57	-2.14309	0.285517	-7.50598	6.0969e-14	3.92661e-12	1	COLON
MALAT1	22052.5	-1.09201	0.145584	-7.5009	6.33787e-14	4.05874e-12	1	COLON
DOK2	67.0673	-1.46913	0.196053	-7.49353	6.70465e-14	4.26951e-12	1	COLON
EFCAB14	144.722	1.20386	0.160837	7.48498	7.1559e-14	4.5314e-12	1	COLON
CCDC107	63.1861	-1.30614	0.174964	-7.46518	8.31864e-14	5.23843e-12	1	COLON
NFKB1	669.654	-0.964544	0.129285	-7.4606	8.61301e-14	5.39384e-12	1	COLON
MPHOSPH8	149.712	-1.03563	0.139028	-7.44908	9.3991e-14	5.85378e-12	1	COLON
ZNF503	66.9078	-3.18087	0.427151	-7.44672	9.56916e-14	5.92712e-12	1	COLON
TTC37	90.8395	1.44076	0.193794	7.4345	1.04966e-13	6.46626e-12	1	COLON
MZT2A	56.8218	-2.07718	0.27949	-7.43202	1.06949e-13	6.5528e-12	1	COLON
TRIM27	52.8696	2.06777	0.278677	7.41996	1.17152e-13	6.94802e-12	1.02753	COLON
IKBKG	66.2723	-2.29486	0.30941	-7.41688	1.19908e-13	7.26825e-12	1	COLON
KRTCAP2	55.0565	-2.12299	0.286271	-7.41602	1.20691e-13	7.27679e-12	1	COLON
FOXP1	327.244	-1.05576	0.142703	-7.39833	1.37905e-13	9.56419e-12	0.86475	COLON
CAMK4	125.453	1.70272	0.230256	7.39492	1.41493e-13	9.76141e-12	0.86475	COLON
GMPS	46.3044	2.27786	0.309171	7.36763	1.73685e-13	1.03074e-11	1	COLON
IFI16	103.924	1.19839	0.162746	7.36351	1.79138e-13	1.10332e-11	0.958533	COLON
PRNP	507.923	0.824154	0.112011	7.35782	1.86942e-13	1.25662e-11	0.86475	COLON
RAC1	166.451	-1.296	0.176183	-7.35599	1.89515e-13	1.11303e-11	1	COLON
MAP7D1	68.6744	-1.40206	0.191018	-7.33993	2.13702e-13	1.24862e-11	1	COLON
RPS10	449.993	-1.95728	0.266937	-7.33238	2.26093e-13	1.30753e-11	1	COLON
COL4A3	62.2064	4.53451	0.618532	7.33109	2.28297e-13	1.31358e-11	1	COLON
CYBA	133.8	-1.72186	0.235015	-7.3266	2.36066e-13	1.34663e-11	1	COLON
MGA	83.2567	3.16465	0.433135	7.30638	2.74436e-13	1.62265e-11	0.958533	COLON
HEXIM1	95.8664	-1.18734	0.162582	-7.30303	2.81362e-13	1.65533e-11	0.958533	COLON
CDK11A	28.0816	-1.79191	0.245661	-7.29426	3.00308e-13	1.34663e-11	1.27024	COLON
TMEM243	190.553	-0.813879	0.111677	-7.28782	3.15005e-13	1.76064e-11	1	COLON
EIF2A	109.826	1.16623	0.160028	7.28769	3.15316e-13	1.76064e-11	1	COLON
TIPARP	755.537	1.3525	0.185976	7.27245	3.53015e-13	1.96148e-11	1	COLON
U2AF2	80.9021	-2.24497	0.308951	-7.26644	3.69078e-13	2.04073e-11	1	COLON
SKI	64.1264	-1.57325	0.216747	-7.25847	3.91505e-13	2.15423e-11	1	COLON
PSAP	323.646	0.843124	0.116224	7.25429	4.0377e-13	2.21098e-11	1	COLON
SPRY2	37.9707	4.00549	0.552217	7.25348	4.06207e-13	2.21363e-11	1	COLON
PTPN6	117.348	1.4845	0.204786	7.24903	4.19762e-13	2.27655e-11	1	COLON
NDUFV2	65.8048	-1.41935	0.195841	-7.2475	4.24538e-13	2.3793e-11	0.958533	COLON
ICAM3	76.7324	-1.31218	0.181055	-7.2474	4.24863e-13	2.29325e-11	1	COLON
RPS15	806.209	-2.33945	0.32346	-7.23258	4.73911e-13	2.53386e-11	1	COLON
AKNA	417.894	-0.830222	0.115064	-7.21529	5.38174e-13	2.86394e-11	1	COLON
NBAS	39.7575	1.99227	0.27734	7.18349	6.79553e-13	3.59941e-11	1	COLON
PABPN1	125.247	-1.70694	0.238081	-7.16958	7.5226e-13	3.96599e-11	1	COLON
RAB37	168.371	1.13538	0.158466	7.16482	7.7887e-13	4.08727e-11	1	COLON
PFN1	947.575	-1.56815	0.218944	-7.16232	7.9324e-13	4.14349e-11	1	COLON
HSPB1	431.643	-1.94083	0.271381	-7.15167	8.57292e-13	5.10784e-11	0.86475	COLON
ENG	72.7796	2.50259	0.350126	7.14768	8.82568e-13	4.78747e-11	0.958533	COLON
HINT3	55.2979	1.5482	0.216828	7.14023	9.31756e-13	4.82258e-11	1	COLON
BCL2	149.104	-0.923418	0.129516	-7.12973	1.00563e-12	5.15783e-11	1	COLON
ATAD1	57.1937	2.35123	0.330185	7.12093	1.07199e-12	5.47343e-11	1	COLON
ZMYM4	60.1161	1.68973	0.237371	7.11852	1.09092e-12	5.54511e-11	1	COLON
CORO7	53.3725	-1.59269	0.224155	-7.10531	1.20052e-12	5.91219e-11	1.02753	COLON
RABGGTB	93.582	1.28331	0.18076	7.09952	1.25193e-12	6.30693e-11	1	COLON
HMGCS1	95.1405	-1.20222	0.170011	-7.0714	1.53383e-12	7.659e-11	1	COLON
CHMP4A	37.4389	-2.25088	0.318811	-7.06024	1.66214e-12	6.56287e-11	1.27024	COLON
SCPEP1	43.2348	2.75699	0.390519	7.05981	1.6673e-12	8.28896e-11	1	COLON
CNBP	380.872	0.971539	0.138076	7.03625	1.97489e-12	1.12063e-10	0.86475	COLON
ARHGAP21	45.5657	-1.76443	0.250788	-7.03554	1.98484e-12	9.82451e-11	1	COLON
DOCK2	176.344	1.03349	0.147231	7.01952	2.22635e-12	1.0972e-10	1	COLON
MAP2K1	133.317	-0.869133	0.123962	-7.01127	2.36161e-12	1.14994e-10	1	COLON
THEMIS	59.6254	3.55332	0.50681	7.01114	2.36379e-12	1.14994e-10	1	COLON
PECAM1	148.14	1.35421	0.193404	7.00199	2.52348e-12	1.22211e-10	1	COLON
CHTOP	108.132	1.22468	0.174905	7.00196	2.52407e-12	1.26475e-10	0.958533	COLON
H1FX	286.356	-1.7804	0.254291	-7.00143	2.5337e-12	1.22211e-10	1	COLON
POLE3	79.8379	1.38821	0.198858	6.98092	2.93245e-12	1.4025e-10	1	COLON
MORF4L1	167.886	-1.16093	0.16654	-6.9709	3.14913e-12	1.49981e-10	1	COLON
TSPYL2	624.078	-1.34047	0.1924	-6.96709	3.2357e-12	1.53459e-10	1	COLON
WHAMM	92.9982	-1.4319	0.205857	-6.9558	3.50577e-12	1.65574e-10	1	COLON
ATXN2L	112.368	-1.31142	0.188727	-6.94875	3.68536e-12	1.73334e-10	1	COLON
MPZL3	291.281	1.6217	0.233586	6.94262	3.84901e-12	1.80283e-10	1	COLON
SERBP1	182.488	-0.979871	0.141231	-6.93809	3.97442e-12	1.85391e-10	1	COLON
NELL2	30.0853	4.23855	0.611392	6.93262	4.13111e-12	1.9191e-10	1	COLON
GZMK	10.1127	-7.76941	1.12119	-6.92959	4.22059e-12	2.22332e-10	0.874699	COLON
AAGAB	38.0278	2.06902	0.299082	6.91792	4.5833e-12	2.12048e-10	1	COLON
RASGEF1B	187.688	2.02839	0.293595	6.90881	4.88741e-12	2.24286e-10	1	COLON
HSH2D	150.677	-1.08309	0.156901	-6.90298	5.09231e-12	2.32747e-10	1	COLON
NAA20	39.5547	2.03267	0.294894	6.89288	5.46728e-12	2.48882e-10	1	COLON
HDAC9	122.276	1.44242	0.209287	6.89207	5.4987e-12	2.49311e-10	1	COLON
PTP4A3	55.1169	-1.93889	0.281578	-6.88582	5.74557e-12	2.59466e-10	1	COLON
PPIA	654.5	-1.21319	0.176281	-6.88215	5.89564e-12	3.05451e-10	0.86475	COLON
ACTR2	241.494	-0.849265	0.123456	-6.87908	6.02407e-12	3.09657e-10	0.86475	COLON
GCHFR	12.1672	-2.80496	0.408195	-6.87162	6.34767e-12	2.85519e-10	1	COLON
HNRNPH2	120.869	1.30213	0.189805	6.86039	6.86731e-12	3.06461e-10	1	COLON
ACTL6A	41.1313	2.82153	0.411714	6.85314	7.22474e-12	3.11321e-10	1.02753	COLON
EPAS1	251.782	-1.07161	0.156408	-6.85138	7.31414e-12	3.2259e-10	1	COLON
MYH9	442.278	-0.73328	0.107429	-6.82572	8.7488e-12	3.84371e-10	1	COLON
RPL17	222.984	-1.70585	0.249936	-6.82514	8.7837e-12	3.84414e-10	1	COLON
CA2	119.502	1.27855	0.187724	6.81081	9.70539e-12	4.41422e-10	0.958533	COLON
NCOA6	47.8008	2.69241	0.395978	6.79939	1.0506e-11	4.54523e-10	1	COLON
ZFAND2A	54.3635	-1.4079	0.207095	-6.79831	1.05852e-11	4.47388e-10	1.02753	COLON
POM121	51.8658	-1.20882	0.178264	-6.78105	1.19307e-11	5.142e-10	1	COLON
IL32	785.687	-2.26916	0.335021	-6.77318	1.25979e-11	5.40897e-10	1	COLON
VPS37A	41.8446	1.53207	0.226443	6.76582	1.32558e-11	5.66998e-10	1	COLON
AIDA	32.1773	-2.22576	0.32915	-6.76215	1.35958e-11	5.78052e-10	1	COLON
CSTF2T	35.0601	3.8198	0.564898	6.76193	1.36162e-11	5.78052e-10	1	COLON
SET	299.777	-0.689009	0.102024	-6.75339	1.44426e-11	6.10847e-10	1	COLON
GPR18	27.8079	3.02192	0.448349	6.74011	1.58266e-11	6.66896e-10	1	COLON
EIF4A2	575.405	0.801952	0.119008	6.73863	1.5989e-11	6.71242e-10	1	COLON
TUBA1B	176.187	-0.996973	0.148006	-6.73605	1.6275e-11	7.81427e-10	0.86475	COLON
GOT2	56.3354	3.80271	0.565195	6.72813	1.71855e-11	6.9955e-10	1.02753	COLON
ANKRD11	285.888	-0.808787	0.120214	-6.72792	1.7211e-11	8.17389e-10	0.86475	COLON
GDPD5	5.10484	-3.81055	0.566387	-6.72783	1.72217e-11	7.17676e-10	1	COLON
TDRKH	34.718	4.01513	0.598624	6.70727	1.98301e-11	8.17389e-10	1	COLON
PRKAR2A	113.026	-1.28875	0.192154	-6.70686	1.98855e-11	8.17389e-10	1	COLON
YPEL3	207.625	-1.10135	0.164235	-6.7059	2.00174e-11	8.19122e-10	1	COLON
PIK3CD	271.736	0.898975	0.134077	6.70489	2.01555e-11	8.21806e-10	1	COLON
HMGN2	148.495	-1.07361	0.160139	-6.70422	2.02484e-11	8.21806e-10	1	COLON
SPOCK2	601.297	-0.656661	0.0979529	-6.70385	2.03005e-11	8.21806e-10	1	COLON
HSPD1	814.158	-1.01455	0.151351	-6.70326	2.03821e-11	8.22173e-10	1	COLON
ST6GALNAC6	12.197	-7.43668	1.11	-6.69972	2.08819e-11	8.39349e-10	1	COLON
TNFSF14	81.2787	-1.37424	0.205231	-6.69604	2.14145e-11	8.57714e-10	1	COLON
PIK3R1	206.807	-1.05929	0.158315	-6.69101	2.21633e-11	1.01638e-09	0.86475	COLON
LDLRAD4	458.906	1.70677	0.25533	6.68456	2.31623e-11	1.05787e-09	0.86475	COLON
LATS2	53.1862	-1.23709	0.18535	-6.67434	2.48347e-11	9.64642e-10	1.02753	COLON
B3GALT5	96.7329	1.38356	0.207442	6.66963	2.56449e-11	1.01638e-09	1	COLON
TMSB4X	2315.47	-1.94359	0.292231	-6.65087	2.91357e-11	1.3079e-09	0.86475	COLON
HNRNPUL1	343.226	-1.18464	0.17828	-6.64481	3.03605e-11	1.19492e-09	1	COLON
SLC1A4	215.051	1.01401	0.152701	6.64045	3.12722e-11	1.22654e-09	1	COLON
CNPY2	48.734	-1.45816	0.219741	-6.63583	3.22681e-11	1.26124e-09	1	COLON
LTBP3	159.986	1.10779	0.167085	6.63013	3.35395e-11	1.30643e-09	1	COLON
IRF2BPL	45.4592	-2.17072	0.327903	-6.62001	3.59178e-11	1.35228e-09	1.02753	COLON
GALT	62.3363	1.77025	0.267474	6.6184	3.63113e-11	1.39996e-09	1	COLON
PCMTD2	60.4721	3.58501	0.542062	6.61365	3.74956e-11	1.44072e-09	1	COLON
TLE1	580.902	-0.997785	0.15096	-6.6096	3.85355e-11	1.47567e-09	1	COLON
STK4	249.253	-0.764896	0.115751	-6.60813	3.8921e-11	1.48542e-09	1	COLON
TAF10	69.6995	-1.97286	0.298614	-6.60671	3.92967e-11	1.54899e-09	0.958533	COLON
GLUD1	142.014	-1.15433	0.17477	-6.60488	3.97841e-11	1.51326e-09	1	COLON
TYMP	51.4093	-1.94395	0.294427	-6.60248	4.04329e-11	1.5328e-09	1	COLON
THAP5	15.3942	-7.43039	1.12641	-6.59651	4.2094e-11	1.58517e-09	1	COLON
CPNE7	117.554	1.31021	0.198786	6.59106	4.36693e-11	1.63905e-09	1	COLON
HSPA5	931.875	-0.802518	0.121832	-6.5871	4.48497e-11	1.67779e-09	1	COLON
ELOVL6	131.151	1.84157	0.279667	6.58485	4.55331e-11	1.96156e-09	0.86475	COLON
UBXN2A	55.2063	-1.17061	0.178368	-6.56287	5.27812e-11	1.96156e-09	1	COLON
INPP5B	114.145	1.5325	0.23365	6.55898	5.41765e-11	2.00683e-09	1	COLON
TDG	75.3379	-1.21648	0.185579	-6.55504	5.56264e-11	2.05383e-09	1	COLON
FAM160B2	39.9307	2.05342	0.31341	6.55186	5.68242e-11	2.09124e-09	1	COLON
TM9SF4	42.8573	2.23582	0.341857	6.54022	6.14288e-11	2.193e-09	1.02753	COLON
HLA-F	430.236	-1.16753	0.178546	-6.53912	6.18824e-11	2.2627e-09	1	COLON
PTPN9	88.3649	1.15255	0.176407	6.53351	6.42474e-11	2.34162e-09	1	COLON
DDX21	199.382	-1.35688	0.207941	-6.52528	6.78728e-11	2.45795e-09	1	COLON
COX20	51.7109	-2.29668	0.35201	-6.52446	6.82456e-11	2.41294e-09	1.02753	COLON
TANC2	75.7959	1.30555	0.200289	6.5183	7.11104e-11	2.66954e-09	0.958533	COLON
RAB11FIP5	65.8807	2.73656	0.420068	6.51457	7.28998e-11	2.63159e-09	1	COLON
MRPL12	16.7885	-2.25971	0.347845	-6.49631	8.23161e-11	2.9527e-09	1	COLON
SYS1	69.7558	3.55831	0.54909	6.48038	9.14939e-11	3.27156e-09	1	COLON
CYP51A1	23.6981	-2.4574	0.379417	-6.47678	9.37008e-11	3.33993e-09	1	COLON
PRF1	24.1904	-4.41979	0.683389	-6.46746	9.96657e-11	3.54141e-09	1	COLON
FGD6	46.7776	2.1827	0.338577	6.44666	1.14339e-10	4.05009e-09	1	COLON
DDX24	374.845	-0.766219	0.119023	-6.43755	1.2142e-10	4.28751e-09	1	COLON
MYO5A	120.487	3.47522	0.54034	6.43154	1.26319e-10	4.44667e-09	1	COLON
RPS27A	1804.78	-1.62716	0.253273	-6.42455	1.32262e-10	5.30172e-09	0.86475	COLON
RCN2	67.3484	1.19388	0.185861	6.42352	1.33157e-10	4.67287e-09	1	COLON
GIMAP6	174.909	3.71163	0.57808	6.42062	1.35717e-10	4.74799e-09	1	COLON
ELL2	216.681	-0.865647	0.135065	-6.40911	1.46374e-10	5.10508e-09	1	COLON
STXBP2	71.5915	-1.10445	0.17242	-6.4056	1.49782e-10	5.2079e-09	1	COLON
NR4A1	518.34	1.13184	0.176846	6.40013	1.55246e-10	6.14787e-09	0.86475	COLON
SSBP4	52.0757	-1.92798	0.301807	-6.38811	1.6795e-10	5.64847e-09	1.02753	COLON
KIAA0100	55.5691	1.64294	0.257197	6.38787	1.68211e-10	5.79534e-09	1	COLON
TGFB1	169.734	-2.16705	0.339564	-6.38186	1.74948e-10	6.00919e-09	1	COLON
NDFIP2	3.66942	-7.20425	1.1306	-6.37208	1.86481e-10	6.36676e-09	1	COLON
NUP107	58.0096	2.84045	0.445947	6.36946	1.89691e-10	6.4569e-09	1	COLON
NFATC2IP	119.929	-1.29741	0.203952	-6.36132	2.00032e-10	6.78851e-09	1	COLON
CPSF2	44.1573	3.23538	0.509492	6.35022	2.15004e-10	7.27483e-09	1	COLON
LRP1	44.336	2.56772	0.404639	6.3457	2.21422e-10	7.44754e-09	1	COLON
TPT1	5839.18	-0.883427	0.139262	-6.34363	2.2441e-10	7.52569e-09	1	COLON
IRF1	789.962	-1.30239	0.20536	-6.34199	2.26811e-10	7.58379e-09	1	COLON
TSC22D4	47.7002	-1.56096	0.246609	-6.32967	2.45684e-10	8.16666e-09	1	COLON
CCDC88B	101.336	-1.25994	0.199269	-6.32282	2.56836e-10	8.51239e-09	1	COLON
ATR	63.6965	1.51917	0.240548	6.31548	2.69318e-10	8.90005e-09	1	COLON
PARVB	39.7927	-1.73873	0.275442	-6.31249	2.74572e-10	9.04732e-09	1	COLON
NUP133	37.4365	2.17545	0.34471	6.31094	2.77341e-10	7.36565e-09	1.27024	COLON
ISG20	95.6817	-2.06213	0.327055	-6.30515	2.87916e-10	9.72568e-09	0.958533	COLON
PREP	48.6214	1.82862	0.290217	6.30085	2.96014e-10	9.66146e-09	1	COLON
HLA-B	4495.45	-0.714845	0.113455	-6.3007	2.96304e-10	9.66146e-09	1	COLON
HADHB	112.614	1.10314	0.175086	6.30054	2.9662e-10	9.66146e-09	1	COLON
CCDC159	19.3048	-6.02763	0.956868	-6.29933	2.98929e-10	9.70876e-09	1	COLON
NUFIP2	136.574	-1.01063	0.160464	-6.29818	3.01166e-10	9.72568e-09	1	COLON
DHX38	62.4001	1.88133	0.298737	6.29762	3.02244e-10	9.66146e-09	1.02753	COLON
GABARAP	32.4192	-2.07673	0.329836	-6.29626	3.0492e-10	8.00282e-09	1.27024	COLON
NGDN	53.9903	2.08676	0.33167	6.29167	3.14068e-10	9.84254e-09	1.02753	COLON
ASB3	11.4672	-4.79038	0.762019	-6.28644	3.24834e-10	1.04306e-08	1	COLON
NEK7	133.558	-1.07614	0.171558	-6.27275	3.54733e-10	1.13585e-08	1	COLON
MLEC	101.898	1.34245	0.214135	6.26917	3.62966e-10	1.15894e-08	1	COLON
LRBA	158.683	2.6409	0.421426	6.26657	3.69097e-10	1.1752e-08	1	COLON
PRKCSH	112.632	-0.888511	0.141983	-6.25786	3.90301e-10	1.23923e-08	1	COLON
IFI6	55.6402	-1.99834	0.319378	-6.25699	3.92482e-10	1.24268e-08	1	COLON
EIF5	616.129	-0.719509	0.115107	-6.25077	4.0843e-10	1.28615e-08	1	COLON
PRRG3	23.4774	-5.02257	0.803515	-6.25075	4.08483e-10	1.28615e-08	1	COLON
DNAJA3	35.2901	2.34504	0.376057	6.23587	4.4928e-10	1.41069e-08	1	COLON
UBASH3B	135.261	1.02027	0.16362	6.23561	4.50021e-10	1.61017e-08	0.86475	COLON
ZNF407	44.6087	3.87125	0.621128	6.23262	4.58704e-10	1.4363e-08	1	COLON
CAPZB	264.028	-0.746553	0.119856	-6.22874	4.70213e-10	1.46828e-08	1	COLON
NRROS	17.5342	-2.30706	0.370839	-6.22119	4.93399e-10	1.53224e-08	1	COLON
LGALS9	46.8429	-1.76338	0.283616	-6.21748	5.05197e-10	1.53104e-08	1.02753	COLON
XYLT1	100.116	1.59315	0.25644	6.21254	5.21333e-10	1.61017e-08	1	COLON
SERPINA11	26.7039	3.70545	0.596641	6.21052	5.281e-10	1.62663e-08	1	COLON
MAPKAPK3	88.8529	1.5067	0.242618	6.2102	5.29172e-10	1.69126e-08	0.958533	COLON
ZNF430	36.1307	-1.52551	0.245883	-6.2042	5.4977e-10	1.68879e-08	1	COLON
SLC35A4	64.7164	2.10188	0.339073	6.19891	5.68566e-10	1.73711e-08	1	COLON
NCR2	99.4466	3.48808	0.562885	6.19679	5.76262e-10	1.7559e-08	1	COLON
SNX19	64.0984	3.43243	0.554455	6.19064	5.99187e-10	1.81599e-08	1	COLON
RANBP1	40.4977	-1.36488	0.220755	-6.18279	6.29805e-10	1.90369e-08	1	COLON
RPL13	2658.28	-1.25993	0.203927	-6.17835	6.47747e-10	1.94754e-08	1	COLON
GTF2B	63.0852	3.47446	0.562395	6.17798	6.49289e-10	1.90492e-08	1.02753	COLON
LEKR1	18.9083	4.4677	0.724341	6.16795	6.91809e-10	2.07451e-08	1	COLON
MSH2	49.3697	3.73033	0.605371	6.16206	7.18061e-10	2.09001e-08	1.02753	COLON
SNHG9	70.9659	-2.70699	0.439435	-6.16017	7.26667e-10	2.16757e-08	1	COLON
PGAM1	82.6938	-1.02354	0.166215	-6.15797	7.36848e-10	2.19217e-08	1	COLON
MAFK	27.6771	-1.92647	0.312892	-6.15697	7.41505e-10	1.77395e-08	1.27024	COLON
ESCO2	65.0643	-3.75671	0.610246	-6.15606	7.45748e-10	2.21147e-08	1	COLON
ENTPD1	110.159	2.01748	0.327739	6.15575	7.47236e-10	2.21147e-08	1	COLON
DHX16	50.5447	3.47087	0.564806	6.14523	7.98473e-10	2.35695e-08	1	COLON
PMPCB	90.7572	1.01169	0.164704	6.14248	8.12428e-10	2.39192e-08	1	COLON
AQP3	323.954	3.22213	0.525084	6.13641	8.44077e-10	2.47866e-08	1	COLON
DDIT4	342.036	-1.18532	0.193193	-6.13544	8.49243e-10	2.48738e-08	1	COLON
C2CD2L	24.387	-6.98303	1.13857	-6.13319	8.6136e-10	2.51637e-08	1	COLON
RASA2	348.037	-0.54597	0.0890587	-6.13045	8.763e-10	2.55344e-08	1	COLON
TBL1X	23.576	-1.96909	0.321489	-6.12489	9.07472e-10	2.63749e-08	1	COLON
LYSMD3	34.8616	1.73315	0.28321	6.11967	9.3771e-10	2.71777e-08	1	COLON
CAPN12	64.9642	-1.55761	0.254541	-6.1193	9.39891e-10	2.71777e-08	1	COLON
TRAC	328.346	1.08198	0.176885	6.11684	9.54477e-10	2.75293e-08	1	COLON
PRDX3	40.6134	2.42511	0.396722	6.11288	9.78518e-10	2.80211e-08	1	COLON
NCOA2	81.2872	1.12235	0.183613	6.11259	9.8024e-10	2.80211e-08	1	COLON
FTO	61.2354	2.25079	0.368232	6.11243	9.8126e-10	2.80211e-08	1	COLON
RWDD1	86.6771	-1.11645	0.18266	-6.11219	9.82711e-10	2.80211e-08	1	COLON
TMEM183A	43.7275	-1.4219	0.232641	-6.112	9.83889e-10	2.80211e-08	1	COLON
IFRD1	344.677	-0.770436	0.126137	-6.10795	1.00916e-09	2.86687e-08	1	COLON
TESC	21.7915	-1.66633	0.273233	-6.09858	1.07017e-09	3.14833e-08	0.956067	COLON
ATXN10	115.079	1.09775	0.180022	6.09787	1.07489e-09	3.03837e-08	1	COLON
NMRK1	51.86	1.95915	0.321347	6.09668	1.08295e-09	2.98657e-08	1.02753	COLON
VPS41	57.2731	1.5181	0.249109	6.09411	1.10049e-09	3.10301e-08	1	COLON
CCDC144A	10.523	-6.6603	1.09347	-6.09095	1.12243e-09	3.14919e-08	1	COLON
ATF3	330.12	1.57568	0.258794	6.08855	1.13935e-09	3.18876e-08	1	COLON
STX18	37.0373	2.10193	0.345538	6.08305	1.17918e-09	3.29211e-08	1	COLON
KDM3A	58.7604	2.63024	0.432463	6.08201	1.18684e-09	3.30535e-08	1	COLON
HIF1AN	51.0407	3.48651	0.574597	6.06775	1.29715e-09	3.50717e-08	1.02753	COLON
PKDCC	44.5633	3.98332	0.656779	6.06493	1.32009e-09	3.56045e-08	1.02753	COLON
SPRYD3	39.7719	1.95128	0.32228	6.05461	1.40754e-09	3.89133e-08	1	COLON
CMIP	125.777	-1.58918	0.262691	-6.04959	1.45213e-09	4.00485e-08	1	COLON
PDE4D	217.167	-1.66631	0.275991	-6.03756	1.56461e-09	4.2961e-08	1	COLON
TNIP1	141.354	-0.933994	0.154699	-6.03749	1.56532e-09	4.2961e-08	1	COLON
LTA4H	512.191	1.10652	0.183342	6.03528	1.58688e-09	4.34476e-08	1	COLON
SCCPDH	50.8361	3.45184	0.573186	6.0222	1.72067e-09	4.6997e-08	1	COLON
ISY1	41.05	-1.30864	0.217375	-6.0202	1.74202e-09	4.74659e-08	1	COLON
TBCK	34.104	1.97628	0.328559	6.01498	1.79912e-09	4.89042e-08	1	COLON
NPIPB3	41.1073	-4.02026	0.668482	-6.01401	1.80986e-09	4.90785e-08	1	COLON
MMS19	42.5085	3.37521	0.561283	6.01338	1.8169e-09	4.91332e-08	1	COLON
TCEA2	37.3334	-1.73286	0.288183	-6.01306	1.82055e-09	4.91332e-08	1	COLON
ZNF121	50.83	-1.54599	0.257377	-6.00673	1.89304e-09	5.09681e-08	1	COLON
RHOQ	54.5473	-1.3529	0.225285	-6.0053	1.90984e-09	5.12987e-08	1	COLON
PLPP1	137.483	-1.11874	0.186331	-6.00406	1.92446e-09	5.15691e-08	1	COLON
RND1	16.2711	-2.71544	0.452622	-5.99937	1.98091e-09	5.29565e-08	1	COLON
SLC40A1	30.5084	3.67961	0.61376	5.9952	2.03231e-09	5.41888e-08	1	COLON
RALB	58.1744	2.61211	0.435724	5.99486	2.03656e-09	5.41888e-08	1	COLON
FEM1A	41.8326	-2.22081	0.370494	-5.9942	2.04495e-09	5.42847e-08	1	COLON
SLAMF7	7.10166	-4.23439	0.706616	-5.99249	2.06649e-09	5.47281e-08	1	COLON
HIBADH	28.7774	3.78708	0.63212	5.99108	2.08447e-09	5.50758e-08	1	COLON
ANXA7	179.363	0.95322	0.159162	5.98901	2.11126e-09	5.56539e-08	1	COLON
SCN2A	3.32631	-6.89027	1.15084	-5.98715	2.13547e-09	5.61615e-08	1	COLON
CCT7	129.713	1.0511	0.175659	5.98378	2.18021e-09	5.72053e-08	1	COLON
EML4	861.591	-0.939109	0.157054	-5.97952	2.2379e-09	5.85835e-08	1	COLON
SIK1	48.6947	-2.65471	0.444069	-5.97814	2.25707e-09	5.89489e-08	1	COLON
CD164	585.261	0.563693	0.0943746	5.97293	2.33028e-09	6.07213e-08	1	COLON
CRIP1	103.266	-2.15702	0.361893	-5.96039	2.51638e-09	6.54202e-08	1	COLON
WIPF1	283.911	-0.75503	0.126707	-5.95886	2.53999e-09	6.58827e-08	1	COLON
TIMMDC1	43.9795	2.11072	0.35442	5.95543	2.59392e-09	6.71279e-08	1	COLON
HSPE1	307.835	-1.15019	0.19317	-5.95429	2.61208e-09	6.7444e-08	1	COLON
MRFAP1	171.235	1.04974	0.176341	5.95291	2.63414e-09	6.77596e-08	1	COLON
FAM53C	114.54	1.55848	0.261878	5.95117	2.66228e-09	6.82737e-08	1	COLON
CEP95	60.7366	1.15165	0.193609	5.94833	2.70884e-09	6.77596e-08	1.02753	COLON
ATG3	54.8002	1.17104	0.197364	5.93338	2.96764e-09	7.59326e-08	1	COLON
PEPD	30.9803	2.01703	0.339994	5.93255	2.98262e-09	7.61442e-08	1	COLON
2023-03-07	163.731	0.885683	0.149413	5.92776	3.07093e-09	7.82225e-08	1	COLON
SRGAP2C	29.6104	-2.04457	0.345025	-5.92586	3.10674e-09	7.89571e-08	1	COLON
RAB11A	74.4207	1.38724	0.234716	5.91026	3.41564e-09	8.64355e-08	1	COLON
TAGAP	344.901	1.33513	0.225901	5.91023	3.41624e-09	8.64355e-08	1	COLON
PSMD9	46.5768	-1.2631	0.213986	-5.90273	3.57543e-09	8.78431e-08	1.02753	COLON
PRPSAP2	46.8377	3.55231	0.601874	5.90208	3.58942e-09	9.04136e-08	1	COLON
CYP2E1	36.9705	3.9061	0.662179	5.89886	3.66011e-09	9.19896e-08	1	COLON
TPP1	107.564	2.48984	0.422173	5.89769	3.68634e-09	9.62302e-08	0.958533	COLON
MAF	142.766	-0.913276	0.154888	-5.89637	3.71577e-09	9.31821e-08	1	COLON
ZNF207	263.677	0.677837	0.115076	5.89032	3.8544e-09	9.62327e-08	1	COLON
CCPG1	30.4489	-3.62694	0.616385	-5.88422	3.99948e-09	9.95757e-08	1	COLON
IFNAR2	57.5799	-1.29618	0.22029	-5.88395	4.00587e-09	9.95757e-08	1	COLON
INSIG1	142.457	-1.29069	0.219459	-5.88121	4.07266e-09	1.01014e-07	1	COLON
CFLAR	281.47	-0.956374	0.162676	-5.87902	4.12713e-09	1.02142e-07	1	COLON
FOCAD	45.096	1.87081	0.318388	5.87588	4.20594e-09	1.0364e-07	1	COLON
MACF1	914.373	0.827277	0.140809	5.87516	4.22444e-09	1.19082e-07	0.86475	COLON
INSIG2	56.1527	3.28929	0.560554	5.86794	4.41252e-09	1.08494e-07	1	COLON
UBE2L6	165.834	1.00345	0.17105	5.86642	4.45302e-09	1.24988e-07	0.86475	COLON
ARRB2	104.88	-1.16942	0.199483	-5.86223	4.56689e-09	1.12047e-07	1	COLON
CAP1	306.548	-0.678771	0.115896	-5.85672	4.72096e-09	1.15577e-07	1	COLON
ABLIM1	198.649	0.841843	0.143821	5.85339	4.81642e-09	1.1766e-07	1	COLON
BANK1	31.3107	3.70977	0.634558	5.84623	5.02833e-09	1.22309e-07	1	COLON
KMT5B	99.3345	2.3891	0.408658	5.84622	5.02882e-09	1.27068e-07	0.958533	COLON
ZNF496	31.3368	2.16133	0.370229	5.83784	5.28834e-09	1.02812e-07	1.27024	COLON
TMBIM4	86.0635	-1.03717	0.177813	-5.83294	5.44602e-09	1.31622e-07	1	COLON
NT5C3A	53.8434	-1.01608	0.174401	-5.8261	5.67385e-09	1.36836e-07	1	COLON
SLC25A11	39.1757	1.76178	0.302761	5.81906	5.91804e-09	1.42121e-07	1	COLON
FAM3C	44.2224	-1.57014	0.269887	-5.81777	5.96362e-09	1.39674e-07	1.02753	COLON
TRANK1	58.7209	1.84679	0.317841	5.81043	6.23141e-09	1.4933e-07	1	COLON
VPS8	30.7667	3.11708	0.536902	5.80568	6.41067e-09	1.53245e-07	1	COLON
INPP5D	302.637	-0.666109	0.114748	-5.80495	6.43851e-09	1.5332e-07	1	COLON
STX5	48.05	-1.24117	0.2139	-5.80256	6.53117e-09	1.55201e-07	1	COLON
SMDT1	83.497	-1.10847	0.19118	-5.79808	6.7078e-09	1.63889e-07	0.958533	COLON
MAP3K4	58.4566	1.93375	0.333544	5.79759	6.72756e-09	1.59533e-07	1	COLON
CMTR2	26.7007	3.36313	0.580475	5.79375	6.88321e-09	1.62521e-07	1	COLON
SPTLC3	29.991	3.4823	0.601083	5.79338	6.89831e-09	1.62521e-07	1	COLON
INTS14	33.8099	3.80347	0.656555	5.79308	6.91091e-09	1.62521e-07	1	COLON
AGAP3	54.1834	1.46205	0.252425	5.79203	6.95407e-09	1.63197e-07	1	COLON
MIR22HG	32.1656	-1.56574	0.270409	-5.79026	7.02779e-09	1.64247e-07	1	COLON
C9orf72	19.4005	2.98005	0.515205	5.78419	7.28614e-09	1.69935e-07	1	COLON
CALM3	134.087	-1.2345	0.213602	-5.77944	7.49504e-09	1.74448e-07	1	COLON
METTL17	64.035	3.24112	0.561169	5.77565	7.6655e-09	1.7805e-07	1	COLON
PPM1M	24.24	3.5679	0.61786	5.7746	7.71342e-09	1.86251e-07	0.956067	COLON
NCOR2	76.8961	-1.35353	0.234437	-5.7735	7.76397e-09	1.79968e-07	1	COLON
PLCL2	62.4429	3.18624	0.552093	5.77121	7.87044e-09	1.82064e-07	1	COLON
RNF152	70.6764	1.29494	0.224559	5.76661	8.08821e-09	1.86341e-07	1	COLON
SEMA4F	26.6528	4.41035	0.764999	5.76518	8.15723e-09	1.53245e-07	1.27024	COLON
RRAGA	32.2411	3.54539	0.615419	5.76093	8.3652e-09	1.92332e-07	1	COLON
IARS2	78.0727	1.46194	0.253811	5.75995	8.41394e-09	2.01413e-07	0.958533	COLON
MPZL1	36.5164	4.33181	0.752666	5.75529	8.64939e-09	1.61134e-07	1.27024	COLON
NRBP1	134.022	0.878362	0.152863	5.74606	9.1345e-09	2.09171e-07	1	COLON
COPS4	34.7716	3.29564	0.573718	5.74435	9.22737e-09	2.10871e-07	1	COLON
EIF4B	449.74	-0.579262	0.100885	-5.7418	9.36729e-09	2.13638e-07	1	COLON
ANKRD12	445.474	-1.01272	0.176393	-5.74123	9.39904e-09	2.13932e-07	1	COLON
TXK	484.514	0.944214	0.164521	5.73916	9.51491e-09	2.16135e-07	1	COLON
ZNF143	32.8663	3.07109	0.536405	5.72532	1.03242e-08	2.33582e-07	1	COLON
MAU2	80.9715	1.30432	0.227977	5.72128	1.05726e-08	2.38252e-07	1	COLON
MDM1	51.1077	2.49268	0.435758	5.72032	1.06327e-08	2.33649e-07	1.02753	COLON
SPG21	57.9712	1.38986	0.243217	5.7145	1.1003e-08	2.47459e-07	1	COLON
MAT2A	141.794	0.925594	0.162187	5.70697	1.15005e-08	2.58135e-07	1	COLON
XPNPEP1	63.0026	1.24596	0.218604	5.69961	1.20081e-08	2.68995e-07	1	COLON
MED28	64.0428	2.39944	0.421743	5.68935	1.27521e-08	2.85099e-07	1	COLON
MLH3	29.0485	2.46294	0.43301	5.68794	1.28579e-08	2.29475e-07	1.27024	COLON
NFE2L2	302.92	0.814528	0.143296	5.68425	1.31391e-08	3.3184e-07	0.86475	COLON
MRPL23	18.4455	-3.5467	0.624523	-5.67905	1.35444e-08	3.13634e-07	0.956067	COLON
DAZAP1	74.862	-0.970449	0.170945	-5.67697	1.371e-08	3.0531e-07	1	COLON
TMX2	43.6683	1.51697	0.267342	5.67427	1.39281e-08	3.09558e-07	1	COLON
CTC1	61.7909	2.55784	0.450806	5.67393	1.39556e-08	3.03047e-07	1.02753	COLON
HYMAI	19.697	-1.73002	0.304972	-5.67272	1.40544e-08	3.11754e-07	1	COLON
TNFSF9	9.86211	-3.22743	0.569175	-5.67036	1.42496e-08	3.14852e-07	1	COLON
TP53INP1	467.466	0.753613	0.13296	5.66798	1.44494e-08	3.18026e-07	1	COLON
ZFYVE27	54.5154	3.11865	0.550524	5.66487	1.47133e-08	3.15771e-07	1.02753	COLON
ACO1	26.7892	1.86269	0.328819	5.6648	1.47193e-08	3.2334e-07	1	COLON
SSBP3	108.758	-1.30481	0.230498	-5.66082	1.50652e-08	3.2966e-07	1	COLON
POLDIP3	61.2981	1.2559	0.222037	5.65625	1.54717e-08	3.2966e-07	1.02753	COLON
BCLAF1	294.632	-0.725624	0.128292	-5.65605	1.54897e-08	3.84537e-07	0.86475	COLON
RNF169	28.0646	-1.77741	0.314447	-5.65251	1.58119e-08	3.44575e-07	1	COLON
MOB3C	21.2125	2.74321	0.485333	5.65223	1.5838e-08	3.44575e-07	1	COLON
SNX4	46.1007	2.10016	0.37171	5.64999	1.60457e-08	3.48425e-07	1	COLON
WBP11	116.926	-0.865541	0.153306	-5.64585	1.64369e-08	3.56238e-07	1	COLON
PIP5K1C	54.8442	-1.24627	0.220872	-5.64248	1.67622e-08	3.62595e-07	1	COLON
SPCS3	145.834	-0.845917	0.149952	-5.64125	1.68823e-08	3.64497e-07	1	COLON
CSNK2A1	100.545	1.32149	0.234321	5.63968	1.70364e-08	3.67125e-07	1	COLON
APBB3	56.5094	1.39823	0.248334	5.63046	1.79731e-08	3.85113e-07	1	COLON
ST13	99.9138	-0.87815	0.155977	-5.63	1.8021e-08	3.85412e-07	1	COLON
EFHC1	40.4576	1.95772	0.348086	5.62424	1.86327e-08	3.97744e-07	1	COLON
EML3	53.6579	1.46681	0.260972	5.62057	1.90331e-08	4.05528e-07	1	COLON
ARPC5L	51.6034	-1.22241	0.217532	-5.61948	1.91538e-08	4.07333e-07	1	COLON
TEX10	28.6093	2.10197	0.374368	5.61471	1.96892e-08	4.17934e-07	1	COLON
LRPPRC	91.0749	0.966999	0.172345	5.61082	2.01366e-08	4.26633e-07	1	COLON
FOXO1	178.828	-0.860977	0.153488	-5.60941	2.03014e-08	4.29322e-07	1	COLON
IPO5	67.5851	1.34901	0.240554	5.60792	2.04771e-08	4.32231e-07	1	COLON
TRAFD1	42.7483	1.47201	0.262552	5.60653	2.06429e-08	4.34869e-07	1	COLON
NAA40	45.6665	3.169	0.565265	5.60622	2.06788e-08	4.34869e-07	1	COLON
ST7	34.7715	2.74464	0.48978	5.60383	2.09671e-08	4.40116e-07	1	COLON
NOL4L	215.239	0.939791	0.16782	5.59999	2.14365e-08	4.4878e-07	1	COLON
NPIPB4	106.388	-1.80008	0.321453	-5.59981	2.14591e-08	4.4878e-07	1	COLON
CLEC11A	38.7518	-2.24644	0.401326	-5.59753	2.17425e-08	4.5387e-07	1	COLON
TMBIM6	900.132	0.533129	0.0952645	5.5963	2.18972e-08	4.56259e-07	1	COLON
MTRNR2L1	555.184	3.51527	0.628234	5.59547	2.20025e-08	4.57612e-07	1	COLON
CSRNP2	63.0457	2.01868	0.36083	5.59455	2.21194e-08	4.59201e-07	1	COLON
ELMOD3	25.9656	2.46408	0.440732	5.59088	2.25927e-08	4.68169e-07	1	COLON
PEX19	31.2875	3.38867	0.606208	5.58995	2.2713e-08	3.84537e-07	1.27024	COLON
PSEN2	26.3887	2.25122	0.40277	5.58936	2.27913e-08	4.71423e-07	1	COLON
RRAGC	22.3273	-2.35377	0.421257	-5.5875	2.30358e-08	4.75612e-07	1	COLON
PHF1	208.014	-0.761615	0.136372	-5.58486	2.33893e-08	4.82032e-07	1	COLON
DCK	56.5141	1.67319	0.299702	5.58286	2.36601e-08	4.86728e-07	1	COLON
IER2	580.257	-1.39013	0.249086	-5.58094	2.39228e-08	4.91241e-07	1	COLON
NAT10	51.8067	1.45365	0.260529	5.57963	2.41026e-08	4.94037e-07	1	COLON
NFIC	81.6254	-1.38565	0.248384	-5.57868	2.42356e-08	5.15457e-07	0.958533	COLON
SSR1	175.95	1.19888	0.214986	5.57653	2.4536e-08	5.02013e-07	1	COLON
PIGO	48.9398	2.06543	0.370722	5.57138	2.52729e-08	5.02329e-07	1.02753	COLON
XRN1	130.995	0.75876	0.136204	5.57077	2.53612e-08	5.16102e-07	1	COLON
ZCCHC7	44.0432	1.51973	0.272872	5.56937	2.55666e-08	5.1935e-07	1	COLON
PSMC1	50.0529	-1.75417	0.315015	-5.56852	2.56913e-08	5.2095e-07	1	COLON
CCZ1B	10.5377	-6.24469	1.12194	-5.56596	2.60714e-08	5.26773e-07	1	COLON
UBTF	57.4484	3.09917	0.557117	5.56288	2.65364e-08	5.22732e-07	1.02753	COLON
SLC35B2	35.1734	3.3984	0.610933	5.56264	2.65722e-08	5.35936e-07	1	COLON
FNBP1	703.702	-0.801833	0.144186	-5.56111	2.68069e-08	6.14183e-07	0.86475	COLON
SOX4	241.856	-1.18137	0.212458	-5.5605	2.68997e-08	6.14183e-07	0.86475	COLON
MFHAS1	55.723	-1.30765	0.235217	-5.55932	2.70825e-08	5.44291e-07	1	COLON
SYAP1	128.096	-1.01555	0.182754	-5.55691	2.74587e-08	5.50875e-07	1	COLON
IRAK3	140.3	-1.30738	0.235311	-5.55599	2.76045e-08	5.52821e-07	1	COLON
EDARADD	3.59961	-3.67084	0.660927	-5.55408	2.79081e-08	5.57915e-07	1	COLON
COMMD8	35.6878	1.78759	0.321883	5.55356	2.79913e-08	5.57929e-07	1	COLON
PEX26	50.6866	-1.03638	0.186619	-5.55346	2.80072e-08	5.57929e-07	1	COLON
ACAT2	31.3545	3.17492	0.571756	5.55294	2.80903e-08	5.58602e-07	1	COLON
MTFR1L	24.3095	3.13896	0.565807	5.54777	2.89339e-08	6.00764e-07	0.956067	COLON
BRD4	160.965	-1.0187	0.183895	-5.53955	3.03245e-08	6.80631e-07	0.86475	COLON
PIGN	45.216	2.63924	0.476832	5.53494	3.11327e-08	6.14183e-07	1	COLON
TGFA	11.2857	4.53598	0.819537	5.53481	3.11562e-08	6.14183e-07	1	COLON
TUG1	238.562	1.09979	0.198714	5.53454	3.12044e-08	6.99183e-07	0.86475	COLON
ZW10	16.2809	3.79231	0.685788	5.52986	3.20488e-08	6.30682e-07	1	COLON
AARS	40.1432	1.96392	0.355237	5.52847	3.2303e-08	6.34583e-07	1	COLON
CACYBP	119.068	-1.01494	0.183625	-5.52726	3.25269e-08	6.37876e-07	1	COLON
TMSB10	564.482	-1.92693	0.348965	-5.52183	3.35491e-08	6.56786e-07	1	COLON
RABL6	40.2917	-1.52917	0.276985	-5.52076	3.37531e-08	6.5964e-07	1	COLON
COL6A3	30.8833	-3.10355	0.562485	-5.51756	3.43734e-08	5.44291e-07	1.27024	COLON
SLC33A1	59.2698	-1.13208	0.205239	-5.51591	3.46978e-08	6.75773e-07	1	COLON
AHR	482.943	-0.990721	0.179941	-5.50581	3.67483e-08	7.10822e-07	1	COLON
IFT57	74.0711	1.0109	0.183872	5.49784	3.84473e-08	7.4242e-07	1	COLON
ITGA5	108.706	3.06391	0.557334	5.49743	3.85357e-08	7.73681e-07	0.958533	COLON
SEC14L1	223.996	-0.770372	0.140232	-5.49356	3.93905e-08	7.5934e-07	1	COLON
C3orf52	19.4477	2.758	0.502143	5.49247	3.96361e-08	7.92446e-07	0.956067	COLON
POLR3C	26.5131	2.02105	0.368177	5.48936	4.03389e-08	7.74985e-07	1	COLON
ZFP36L1	1967.73	-0.965886	0.17606	-5.48613	4.10835e-08	7.86625e-07	1	COLON
WASHC1	20.7226	-2.74337	0.500264	-5.48386	4.16151e-08	8.29214e-07	0.956067	COLON
METTL2B	26.305	-1.48436	0.270697	-5.48345	4.17107e-08	7.95945e-07	1	COLON
CEP192	42.8411	3.78364	0.690025	5.48334	4.17362e-08	7.79024e-07	1.02753	COLON
ZNF395	75.074	-1.34034	0.244503	-5.48189	4.20808e-08	8.34934e-07	0.958533	COLON
SGMS1	34.9416	1.60632	0.293378	5.47525	4.36894e-08	6.7102e-07	1.27024	COLON
PTRH1	24.529	-4.87421	0.890582	-5.47306	4.42322e-08	8.39818e-07	1	COLON
DCTN5	40.2873	3.36465	0.614866	5.47218	4.44535e-08	6.80414e-07	1.27024	COLON
UQCRB	206.546	-1.45034	0.265146	-5.46996	4.5014e-08	8.53233e-07	1	COLON
RPL12	761.022	-1.21634	0.222392	-5.46936	4.51664e-08	8.54694e-07	1	COLON
LAMP1	126.452	-1.19283	0.21812	-5.46871	4.53326e-08	8.56409e-07	1	COLON
PDCL3	30.9671	-1.34794	0.246919	-5.45903	4.78748e-08	9.01431e-07	1	COLON
GPRASP1	33.3444	3.89155	0.713004	5.45796	4.81623e-08	9.0534e-07	1	COLON
SPECC1L	78.9931	-1.29754	0.237789	-5.45668	4.8512e-08	9.10403e-07	1	COLON
ARAP1	59.0545	1.37582	0.252163	5.45608	4.86771e-08	8.93461e-07	1.02753	COLON
ATP6V1B2	57.2978	1.45886	0.267385	5.45602	4.86914e-08	9.12259e-07	1	COLON
RPL26	855.13	-1.5065	0.276983	-5.43896	5.35933e-08	1.00244e-06	1	COLON
GALK2	29.1353	3.3364	0.613467	5.43859	5.37025e-08	1.00283e-06	1	COLON
MAP1LC3A	11.152	-1.94751	0.358148	-5.43772	5.39653e-08	1.00448e-06	1	COLON
SAT1	371.624	-0.636291	0.117014	-5.43772	5.39678e-08	1.00448e-06	1	COLON
ARL5B	132.457	1.66987	0.307142	5.4368	5.42445e-08	1.14497e-06	0.86475	COLON
MTX2	25.1901	4.10555	0.756112	5.42981	5.64129e-08	1.04655e-06	1	COLON
PPP1R9A	135.316	1.51149	0.27841	5.42899	5.66732e-08	1.04966e-06	1	COLON
KLHDC3	48.909	3.09885	0.571072	5.42637	5.75127e-08	1.04006e-06	1.02753	COLON
CBX3	153.435	-0.975729	0.179834	-5.42572	5.77212e-08	1.06732e-06	1	COLON
USP32	33.43	-1.34956	0.248831	-5.42359	5.84139e-08	1.07723e-06	1	COLON
P3H1	37.9908	1.80241	0.332334	5.42349	5.8447e-08	1.07723e-06	1	COLON
COX6A1	118.183	-1.63378	0.301268	-5.423	5.86077e-08	1.07844e-06	1	COLON
STAP1	89.133	1.25718	0.232143	5.41557	6.10946e-08	1.12056e-06	1	COLON
COQ5	21.463	3.61964	0.668441	5.41505	6.12733e-08	1.12202e-06	1	COLON
BTBD11	43.9716	1.9418	0.358633	5.41444	6.14802e-08	1.0992e-06	1.02753	COLON
HNRNPF	179.066	0.829294	0.153195	5.41333	6.1865e-08	1.13103e-06	1	COLON
FOXO3	172.788	-0.720668	0.133223	-5.40949	6.32058e-08	1.15183e-06	1	COLON
TGFBI	22.2496	3.23804	0.59875	5.408	6.37335e-08	1.20898e-06	0.956067	COLON
FRG1	23.8179	-1.62552	0.300614	-5.40733	6.39709e-08	1.1639e-06	1	COLON
GOLGA2	56.4251	-1.24489	0.23042	-5.4027	6.56435e-08	1.19242e-06	1	COLON
SCFD2	23.2828	3.28534	0.608581	5.39837	6.72508e-08	1.2177e-06	1	COLON
SUMF1	44.5878	3.16004	0.585401	5.39808	6.73574e-08	1.2177e-06	1	COLON
GSN	465.466	0.79161	0.146676	5.39701	6.77599e-08	1.22302e-06	1	COLON
BIVM	117.556	-1.07813	0.199799	-5.39607	6.81174e-08	1.22752e-06	1	COLON
RPLP1	4252.01	-1.42756	0.264653	-5.3941	6.88695e-08	1.2391e-06	1	COLON
ERAP2	117.576	3.5075	0.650306	5.39361	6.90557e-08	1.24049e-06	1	COLON
ZNF302	351.491	-1.18459	0.21967	-5.39259	6.94475e-08	1.24555e-06	1	COLON
ZBTB40	52.3379	3.10888	0.576588	5.39185	6.9737e-08	1.24877e-06	1	COLON
PMAIP1	75.5828	-1.64653	0.305465	-5.39023	7.03678e-08	1.25609e-06	1	COLON
NUMA1	101.515	1.01038	0.187462	5.38981	7.05316e-08	1.25704e-06	1	COLON
PNPLA2	150.3	-1.1174	0.207455	-5.38625	7.19428e-08	1.28018e-06	1	COLON
ARHGEF9	50.4309	3.1281	0.580828	5.38558	7.22097e-08	1.25609e-06	1.02753	COLON
TC2N	48.4998	1.53153	0.285007	5.37364	7.71611e-08	1.37088e-06	1	COLON
KCNQ5	11.7855	3.60416	0.670773	5.37315	7.73749e-08	1.37253e-06	1	COLON
NOL8	87.7483	3.19015	0.593831	5.37216	7.78001e-08	1.37791e-06	1	COLON
PLEKHM3	33.4394	3.20383	0.596533	5.37076	7.84076e-08	1.38651e-06	1	COLON
ABHD13	48.3392	3.00282	0.559276	5.36912	7.91214e-08	1.39695e-06	1	COLON
SUGP2	135.53	2.15448	0.401315	5.36856	7.93682e-08	1.39913e-06	1	COLON
C9orf16	47.4811	-1.8518	0.344971	-5.36798	7.96229e-08	1.40144e-06	1	COLON
ATN1	58.6195	-1.41939	0.26444	-5.36752	7.98273e-08	1.40286e-06	1	COLON
SMARCAL1	22.0379	4.09633	0.763482	5.36533	8.08032e-08	1.41781e-06	1	COLON
ANKRD28	266.046	-0.845132	0.157771	-5.35669	8.47607e-08	1.48413e-06	1	COLON
ZFHX3	98.2882	-1.01549	0.189581	-5.35651	8.48446e-08	1.48413e-06	1	COLON
CARS2	48.5596	1.64443	0.307381	5.34981	8.80489e-08	1.5378e-06	1	COLON
RPL32	1491.19	-1.53739	0.287481	-5.34781	8.90247e-08	1.55245e-06	1	COLON
PAK2	224.186	-0.723774	0.135364	-5.34688	8.94842e-08	1.55568e-06	1	COLON
ARF6	236.565	-0.87433	0.163543	-5.34617	8.98369e-08	1.55942e-06	1	COLON
PCNX2	152.219	1.42689	0.267577	5.33265	9.67891e-08	1.67753e-06	1	COLON
SCOC	31.0595	3.57446	0.670466	5.3313	9.75109e-08	1.68746e-06	1	COLON
MAST3	60.695	3.0259	0.56809	5.32645	1.00148e-07	1.72782e-06	1	COLON
CYP7B1	11.0881	4.37596	0.822157	5.32253	1.02335e-07	1.76287e-06	1	COLON
TMEM230	117.406	0.807915	0.151862	5.32008	1.03724e-07	1.78409e-06	1	COLON
TSC22D3	4323.45	0.519844	0.0978525	5.31253	1.08113e-07	1.85335e-06	1	COLON
HCP5	62.7503	-2.18807	0.411887	-5.31231	1.08242e-07	1.85335e-06	1	COLON
AP000936.1	28.9328	-3.02716	0.569878	-5.31193	1.08467e-07	1.85442e-06	1	COLON
THADA	44.0231	3.15689	0.594373	5.3113	1.08847e-07	1.81927e-06	1.02753	COLON
ABHD4	29.0194	2.68796	0.506783	5.30397	1.13308e-07	1.55316e-06	1.27024	COLON
GOLPH3L	16.4368	3.59999	0.680179	5.29271	1.20515e-07	2.05702e-06	1	COLON
MFSD1	40.9143	1.38479	0.261652	5.29246	1.20681e-07	2.05702e-06	1	COLON
GORASP1	30.1825	3.23154	0.610922	5.28961	1.2258e-07	2.08626e-06	1	COLON
KIAA0319L	144.53	2.97593	0.562723	5.28844	1.23362e-07	2.38145e-06	0.86475	COLON
PUM1	171.923	1.09695	0.207469	5.2873	1.24138e-07	2.39291e-06	0.86475	COLON
DHX32	28.7046	4.02135	0.761125	5.28344	1.26783e-07	1.72461e-06	1.27024	COLON
MZF1	40.8796	3.03079	0.573684	5.28304	1.27057e-07	2.15275e-06	1	COLON
PTP4A2	189.479	-0.885441	0.167654	-5.28137	1.28223e-07	2.16927e-06	1	COLON
CD83	1012.82	1.46051	0.276718	5.278	1.30604e-07	2.20625e-06	1	COLON
KCNK6	20.8122	-1.84264	0.349555	-5.2714	1.35389e-07	2.28198e-06	1	COLON
VCPIP1	50.1666	1.42071	0.269521	5.27126	1.35489e-07	2.28198e-06	1	COLON
ARL2BP	36.2298	-1.54076	0.292445	-5.26856	1.37501e-07	2.31242e-06	1	COLON
FBXL20	63.6294	1.33087	0.252648	5.26767	1.38165e-07	2.32015e-06	1	COLON
GHITM	214.388	0.708035	0.134521	5.26337	1.41435e-07	2.37155e-06	1	COLON
TIMM22	26.068	3.21062	0.610066	5.26274	1.41927e-07	2.37629e-06	1	COLON
GZF1	28.1867	1.52998	0.290748	5.26224	1.42314e-07	2.37924e-06	1	COLON
TMEM164	49.6531	2.68249	0.510317	5.25652	1.46807e-07	2.44355e-06	1	COLON
AP5M1	30.2038	3.3676	0.640733	5.25586	1.47337e-07	2.44877e-06	1	COLON
ARL5A	37.1456	-1.55859	0.296615	-5.25458	1.48359e-07	2.46215e-06	1	COLON
TCF12	80.6148	1.06916	0.203473	5.25455	1.48388e-07	2.52481e-06	0.958533	COLON
MIA2	63.9935	1.26326	0.24045	5.25373	1.49052e-07	2.47004e-06	1	COLON
NLRP2	27.1602	4.39335	0.836495	5.25209	1.50381e-07	2.48842e-06	1	COLON
SLC25A20	27.6779	1.70371	0.324448	5.2511	1.51194e-07	2.49823e-06	1	COLON
MT-CO2	6137.76	-0.972753	0.185264	-5.25064	1.5157e-07	2.50079e-06	1	COLON
IDI1	102.545	-0.901282	0.171663	-5.2503	1.5185e-07	2.56893e-06	0.958533	COLON
LTB4R	80.5423	2.95842	0.563485	5.25022	1.51917e-07	2.50288e-06	1	COLON
ADHFE1	29.5627	3.30594	0.629754	5.24957	1.52456e-07	2.50544e-06	1	COLON
CLK1	691.465	0.671404	0.1279	5.24946	1.52545e-07	2.50544e-06	1	COLON
CHID1	29.5291	3.22867	0.615075	5.24923	1.52736e-07	2.50544e-06	1	COLON
GEM	44.9651	1.96927	0.375213	5.24841	1.53415e-07	2.51295e-06	1	COLON
SENP3	20.6147	-3.28968	0.62688	-5.2477	1.54008e-07	2.51806e-06	1	COLON
XPOT	50.603	3.08638	0.588161	5.24751	1.54171e-07	2.51806e-06	1	COLON
ELMO2	73.1991	1.03188	0.196698	5.24603	1.55411e-07	2.53101e-06	1	COLON
TBL1XR1	231.615	0.801322	0.152764	5.24549	1.55865e-07	2.87753e-06	0.86475	COLON
BCL2L2	11.3903	-4.44333	0.847291	-5.24416	1.56998e-07	2.55141e-06	1	COLON
AVL9	57.0776	2.96389	0.565194	5.24402	1.57114e-07	2.55141e-06	1	COLON
NBPF1	27.3411	-1.58454	0.302353	-5.24069	1.59978e-07	2.14028e-06	1.27024	COLON
GRWD1	26.589	3.06368	0.584695	5.23979	1.60756e-07	2.14746e-06	1.27024	COLON
RAD50	6.33493	-6.29782	1.20302	-5.23502	1.64964e-07	2.66743e-06	1	COLON
CD82	102.729	-1.12634	0.215267	-5.23229	1.67426e-07	2.80038e-06	0.958533	COLON
NUFIP1	18.7844	-1.58984	0.303854	-5.23223	1.67479e-07	2.70424e-06	1	COLON
YTHDC1	194.099	-0.67073	0.128201	-5.23187	1.67807e-07	2.70568e-06	1	COLON
IFI44L	138.442	-1.08375	0.207239	-5.22948	1.69991e-07	2.73701e-06	1	COLON
SLCO3A1	42.7475	-1.37726	0.263619	-5.22446	1.74668e-07	2.80038e-06	1	COLON
B3GNT2	86.558	1.30284	0.249439	5.22308	1.7597e-07	2.81725e-06	1	COLON
ARID5B	55.3535	-1.3251	0.25372	-5.22267	1.7636e-07	2.75953e-06	1.02753	COLON
ESYT1	195.587	1.10812	0.212273	5.22029	1.78647e-07	2.85608e-06	1	COLON
CLIC5	72.2377	-0.97289	0.186471	-5.21737	1.81481e-07	2.8916e-06	1	COLON
VDAC2	87.7427	-0.883413	0.169335	-5.21696	1.81881e-07	2.8916e-06	1	COLON
FLAD1	31.6785	3.11405	0.596909	5.21695	1.81889e-07	2.8916e-06	1	COLON
RBM4B	22.4434	1.73012	0.33223	5.20759	1.91312e-07	3.03714e-06	1	COLON
LSM12	19.1336	-2.02545	0.389106	-5.20538	1.93599e-07	3.06708e-06	1	COLON
RNF38	57.1414	2.85526	0.548534	5.20525	1.93739e-07	3.06708e-06	1	COLON
USP35	48.5177	-1.36104	0.261635	-5.20206	1.97092e-07	3.11581e-06	1	COLON
TOR1A	103.061	0.969	0.186391	5.19874	2.0064e-07	3.29076e-06	0.958533	COLON
RIOK2	18.891	3.21272	0.618102	5.19772	2.01752e-07	3.18503e-06	1	COLON
NCK2	59.5041	-1.1538	0.222146	-5.19387	2.05971e-07	3.24711e-06	1	COLON
EHBP1	25.2625	3.03766	0.584993	5.19264	2.07329e-07	2.64301e-06	1.27024	COLON
TMED10	254.373	0.71487	0.137673	5.1925	2.07484e-07	3.26643e-06	1	COLON
NAGA	22.7792	3.41021	0.658273	5.18054	2.21243e-07	3.61796e-06	0.956067	COLON
OGDH	40.5255	1.22321	0.236323	5.17603	2.26657e-07	3.55839e-06	1	COLON
AGO4	65.0405	1.51235	0.292265	5.17461	2.28391e-07	3.58043e-06	1	COLON
C6orf89	71.8206	1.17983	0.228015	5.17436	2.28693e-07	3.58043e-06	1	COLON
ZNF529	37.0712	-1.35355	0.261784	-5.17051	2.33458e-07	3.64497e-06	1	COLON
UQCRC2	142.051	0.849226	0.164313	5.16833	2.36195e-07	4.16129e-06	0.86475	COLON
ISG15	88.9099	-1.81903	0.351987	-5.16789	2.36746e-07	3.69121e-06	1	COLON
SYNRG	208.317	0.749797	0.145095	5.16761	2.37104e-07	3.69173e-06	1	COLON
FBXL5	111.713	0.92521	0.179162	5.16409	2.41608e-07	3.75668e-06	1	COLON
POLD2	32.9998	3.20188	0.620159	5.16299	2.43031e-07	3.77363e-06	1	COLON
DNAJA2	73.0742	1.40672	0.272511	5.16207	2.44235e-07	3.92414e-06	0.958533	COLON
SMARCAD1	33.0801	3.00777	0.582739	5.16143	2.45074e-07	3.80015e-06	1	COLON
STK24	194.964	-0.962458	0.186526	-5.1599	2.4708e-07	3.82602e-06	1	COLON
NUP160	60.1787	1.27893	0.247919	5.15865	2.4874e-07	3.84648e-06	1	COLON
MAP3K8	809.671	0.725728	0.140724	5.1571	2.50799e-07	3.87304e-06	1	COLON
GART	41.0917	1.22821	0.238247	5.15518	2.53384e-07	3.90763e-06	1	COLON
CCT8	107.048	0.834929	0.162017	5.15333	2.55899e-07	3.93345e-06	1	COLON
LGALS1	30.5416	-2.94642	0.571768	-5.15318	2.56099e-07	3.93345e-06	1	COLON
HCG18	172.448	1.52431	0.295882	5.15174	2.58084e-07	3.95857e-06	1	COLON
POP4	27.2819	3.48849	0.677659	5.14785	2.63493e-07	4.03608e-06	1	COLON
RPN1	210.38	0.724873	0.140819	5.14755	2.63913e-07	4.03706e-06	1	COLON
GLT8D1	41.4456	1.42789	0.277418	5.14708	2.64566e-07	4.04159e-06	1	COLON
TSPYL1	224.928	0.849505	0.16507	5.14634	2.65613e-07	4.05212e-06	1	COLON
PLCD1	50.0668	2.84759	0.553934	5.14067	2.73765e-07	4.16527e-06	1	COLON
HIST1H3H	13.7362	-2.56588	0.499337	-5.13857	2.76833e-07	4.20631e-06	1	COLON
CD99L2	24.9639	2.55726	0.497982	5.13524	2.81781e-07	4.27576e-06	1	COLON
TNIK	97.6305	-0.834584	0.162566	-5.1338	2.83944e-07	4.30282e-06	1	COLON
PAM	64.1384	1.34331	0.261694	5.13313	2.84962e-07	4.31248e-06	1	COLON
CSNK1G2	97.5707	-1.41034	0.274968	-5.12911	2.91117e-07	4.5718e-06	0.958533	COLON
APH1A	50.9458	2.14749	0.418689	5.12908	2.91162e-07	4.40043e-06	1	COLON
KDM6B	203.06	-1.02935	0.200766	-5.1271	2.94244e-07	4.44108e-06	1	COLON
SLA	952.275	0.922488	0.179962	5.12602	2.95939e-07	4.46073e-06	1	COLON
IL1R1	488.243	0.532621	0.10406	5.11839	3.08147e-07	4.63243e-06	1	COLON
LIN52	33.895	3.06973	0.599982	5.11636	3.11482e-07	4.67635e-06	1	COLON
SLC1A5	23.7577	-1.389	0.271535	-5.11539	3.13098e-07	4.8907e-06	0.956067	COLON
PREPL	50.1293	1.74936	0.341984	5.11534	3.13169e-07	4.69546e-06	1	COLON
HELZ2	13.6838	-2.54565	0.497828	-5.11352	3.16218e-07	4.73491e-06	1	COLON
OSBPL2	64.5469	1.06948	0.209217	5.11182	3.1907e-07	4.77132e-06	1	COLON
PGBD2	7.82285	3.86257	0.756498	5.10586	3.293e-07	4.91133e-06	1	COLON
MED24	40.2744	1.58501	0.310499	5.10473	3.31268e-07	4.92977e-06	1	COLON
MVB12B	102.043	1.57134	0.30786	5.1041	3.3238e-07	4.93631e-06	1	COLON
SLC25A40	71.4286	2.92009	0.57213	5.1039	3.32717e-07	4.93631e-06	1	COLON
CCNB1IP1	44.1435	3.11854	0.61108	5.10333	3.33732e-07	4.9449e-06	1	COLON
UTRN	472.668	0.742392	0.145521	5.10161	3.36777e-07	4.98152e-06	1	COLON
IFNGR2	60.6463	1.18459	0.232207	5.10144	3.37082e-07	4.98152e-06	1	COLON
SCMH1	38.9461	1.58942	0.31168	5.09952	3.40512e-07	5.02565e-06	1	COLON
LINC01138	17.6886	-3.3697	0.660997	-5.09791	3.43429e-07	5.06212e-06	1	COLON
C1orf35	29.5453	-1.4092	0.276643	-5.09391	3.50747e-07	5.16327e-06	1	COLON
PLIN2	141.173	-1.12144	0.220216	-5.09245	3.53469e-07	5.19659e-06	1	COLON
RNASEK	44.8854	-1.37108	0.269278	-5.09168	3.54902e-07	5.2109e-06	1	COLON
TWF1	25.5679	-1.29406	0.254459	-5.08552	3.66628e-07	5.37611e-06	1	COLON
CHCHD2	200.335	-1.15825	0.227897	-5.08231	3.72872e-07	5.4606e-06	1	COLON
RNF125	198.797	-0.685906	0.134973	-5.08179	3.73902e-07	5.46861e-06	1	COLON
NUDT4	96.0318	-1.06044	0.208804	-5.07864	3.80144e-07	5.55274e-06	1	COLON
ZDHHC5	52.0798	1.31038	0.258136	5.07631	3.84826e-07	5.61391e-06	1	COLON
DHX33	36.0155	-1.74513	0.343845	-5.07535	3.86778e-07	5.63068e-06	1	COLON
SRSF9	76.1857	-1.06244	0.209336	-5.07526	3.8697e-07	5.63068e-06	1	COLON
SF3A2	36.3345	-2.01321	0.397089	-5.06992	3.97982e-07	5.78349e-06	1	COLON
RPA1	193.484	0.855574	0.168824	5.06786	4.02312e-07	5.83146e-06	1	COLON
CDK11B	34.1413	-1.10653	0.218428	-5.06589	4.06504e-07	5.88471e-06	1	COLON
TASP1	23.9308	3.06812	0.605663	5.06572	4.06858e-07	6.14479e-06	0.956067	COLON
MRPS25	41.6864	1.88678	0.372813	5.06092	4.1724e-07	6.03241e-06	1	COLON
SGSH	25.4448	3.23803	0.640025	5.05922	4.20965e-07	4.92977e-06	1.27024	COLON
TPP2	126.125	0.954985	0.188985	5.05324	4.34385e-07	6.26432e-06	1	COLON
TADA3	59.1455	1.4039	0.277935	5.05119	4.39074e-07	6.30786e-06	1	COLON
CPTP	10.088	-1.81944	0.360327	-5.04942	4.43153e-07	6.35841e-06	1	COLON
DCUN1D4	25.2902	3.13462	0.620822	5.04914	4.43801e-07	6.35965e-06	1	COLON
CRAT	15.6449	3.24077	0.642108	5.04708	4.48602e-07	6.42034e-06	1	COLON
KLF9	74.4232	-1.35084	0.267703	-5.04605	4.51039e-07	6.69222e-06	0.958533	COLON
ACIN1	125.991	-0.87985	0.174403	-5.04492	4.53705e-07	7.33304e-06	0.86475	COLON
MTMR1	26.9828	3.16031	0.626909	5.04109	4.62881e-07	6.6038e-06	1	COLON
EIF2S2	62.3276	-1.07254	0.212762	-5.04102	4.63048e-07	6.6038e-06	1	COLON
CAMK2D	48.217	1.76163	0.349463	5.04097	4.63169e-07	6.6038e-06	1	COLON
SYNE2	119.714	-2.02982	0.402874	-5.03836	4.69541e-07	6.68624e-06	1	COLON
KDM4C	144.818	0.802798	0.159419	5.03576	4.75947e-07	6.76047e-06	1	COLON
SNHG3	93.9378	-1.03867	0.206426	-5.03169	4.86169e-07	7.14176e-06	0.958533	COLON
PPP3R1	21.6943	-2.13674	0.424786	-5.03016	4.90081e-07	6.95253e-06	1	COLON
IFITM3	228.473	-1.8738	0.372568	-5.02942	4.91968e-07	6.97057e-06	1	COLON
DUSP1	4273.22	0.527427	0.104878	5.02896	4.9315e-07	6.97859e-06	1	COLON
SLC43A1	14.4665	3.40706	0.677978	5.02533	5.02579e-07	7.09381e-06	1	COLON
ANGEL1	24.922	2.70229	0.537745	5.02522	5.02846e-07	7.09381e-06	1	COLON
PBX4	17.8921	-2.70633	0.538561	-5.0251	5.03169e-07	7.09381e-06	1	COLON
SUOX	35.2037	2.24007	0.445898	5.02374	5.06748e-07	5.78998e-06	1.27024	COLON
RNF166	82.5895	-0.928339	0.184814	-5.02309	5.08462e-07	7.15064e-06	1	COLON
DUSP22	103.797	1.11782	0.22256	5.02257	5.09845e-07	7.1612e-06	1	COLON
DPAGT1	32.019	1.65762	0.330108	5.02144	5.12845e-07	7.19443e-06	1	COLON
POLR1E	22.8821	3.24046	0.645438	5.02055	5.15235e-07	7.2157e-06	1	COLON
RHOB	190.425	-0.808401	0.161023	-5.0204	5.15634e-07	7.2157e-06	1	COLON
ACAD9	16.9506	3.05791	0.609114	5.02027	5.16002e-07	7.50632e-06	0.956067	COLON
PRCP	86.4966	1.03578	0.206481	5.01636	5.26605e-07	7.34509e-06	1	COLON
ZBTB4	114.562	0.781318	0.155756	5.01628	5.26824e-07	7.34509e-06	1	COLON
MYLK3	7.02776	-3.88916	0.775382	-5.0158	5.28143e-07	7.35442e-06	1	COLON
BZW1	268.235	-0.685972	0.13689	-5.01114	5.41095e-07	7.51632e-06	1	COLON
ZNF134	20.9648	3.15951	0.630773	5.00895	5.4727e-07	7.90299e-06	0.956067	COLON
TMTC4	34.5017	3.90966	0.780863	5.00684	5.53306e-07	6.27374e-06	1.27024	COLON
FBXO28	35.3747	2.99249	0.59772	5.00651	5.54252e-07	6.2765e-06	1.27024	COLON
KRR1	98.5666	-0.897949	0.179406	-5.00513	5.58238e-07	7.74496e-06	1	COLON
SLC31A2	18.7312	-1.95448	0.390714	-5.00232	5.66443e-07	7.84918e-06	1	COLON
PSKH1	22.0639	3.88431	0.776666	5.00126	5.69574e-07	7.87331e-06	1	COLON
ALG8	27.6111	3.5693	0.713888	4.99981	5.73878e-07	7.91351e-06	1	COLON
ZNF783	23.308	1.89413	0.378892	4.99914	5.75857e-07	8.21575e-06	0.956067	COLON
APTX	28.7945	2.96396	0.592901	4.99908	5.76039e-07	7.93366e-06	1	COLON
IPCEF1	165.837	1.17969	0.235982	4.99907	5.7608e-07	8.96811e-06	0.86475	COLON
NFS1	22.6396	3.60202	0.720625	4.99846	5.77891e-07	8.23484e-06	0.956067	COLON
ITPK1	29.2685	3.03921	0.608133	4.99761	5.80454e-07	7.98477e-06	1	COLON
ZKSCAN8	47.682	-1.21308	0.242777	-4.99669	5.83227e-07	7.8556e-06	1.02753	COLON
RFX7	50.0539	1.68727	0.33772	4.99606	5.85135e-07	8.02967e-06	1	COLON
UQCC1	20.0763	3.14676	0.630135	4.99379	5.92056e-07	8.10502e-06	1	COLON
NIPSNAP1	34.1759	1.60623	0.321737	4.99237	5.9643e-07	8.15505e-06	1	COLON
ENO1	742.278	0.541134	0.108406	4.99175	5.98361e-07	8.17159e-06	1	COLON
KLHL28	93.6147	0.891335	0.178783	4.98558	6.17764e-07	8.40619e-06	1	COLON
DAP	79.0416	1.00991	0.202696	4.98238	6.28075e-07	8.53624e-06	1	COLON
HDAC8	26.3251	3.52698	0.707929	4.98212	6.28929e-07	8.53761e-06	1	COLON
ARHGEF7	234.793	-0.842989	0.169255	-4.98059	6.33903e-07	9.75245e-06	0.86475	COLON
SMARCD2	26.2327	3.02505	0.607431	4.98007	6.35622e-07	8.60786e-06	1	COLON
HOXA3	19.8708	-1.49493	0.300448	-4.97568	6.50181e-07	8.79452e-06	1	COLON
TLE4	70.8335	-1.65917	0.333563	-4.97407	6.55601e-07	9.17481e-06	0.958533	COLON
HOXB2	51.8914	-1.09852	0.220852	-4.97404	6.55722e-07	8.85889e-06	1	COLON
SNX11	14.1643	2.12877	0.428103	4.97256	6.60755e-07	9.25984e-06	0.956067	COLON
DDX20	20.587	3.37021	0.677786	4.97238	6.61375e-07	8.91763e-06	1	COLON
RPRD1B	40.0753	1.69943	0.34178	4.9723	6.61643e-07	8.91763e-06	1	COLON
PHKG2	45.6945	1.58498	0.319071	4.96748	6.78286e-07	9.12025e-06	1	COLON
WDR6	146.869	0.932384	0.187738	4.96642	6.82013e-07	9.1595e-06	1	COLON
LEPROT	57.6923	2.83384	0.571306	4.96028	7.03925e-07	9.4203e-06	1	COLON
ALDH5A1	13.7504	3.90581	0.787494	4.95979	7.05679e-07	9.43264e-06	1	COLON
JPX	60.1048	-1.55696	0.313966	-4.95902	7.08494e-07	9.45911e-06	1	COLON
MCM5	33.2828	2.40993	0.486106	4.95762	7.13613e-07	9.51624e-06	1	COLON
RPL35	679.264	-1.53724	0.310188	-4.95582	7.20263e-07	9.59363e-06	1	COLON
AGA	32.2833	2.39718	0.484099	4.95184	7.35136e-07	9.76877e-06	1	COLON
ZNF672	28.1579	2.75157	0.555825	4.95042	7.40542e-07	8.00999e-06	1.27024	COLON
LDHB	287.4	0.727769	0.147048	4.94919	7.45247e-07	9.87405e-06	1	COLON
TMEM184C	80.1405	1.06721	0.215637	4.94908	7.45635e-07	9.87405e-06	1	COLON
TXNDC12	60.5352	1.12971	0.228266	4.94907	7.45672e-07	9.87405e-06	1	COLON
PCYOX1	68.049	2.76626	0.559102	4.94769	7.51003e-07	9.93304e-06	1	COLON
LYRM1	26.0976	3.024	0.611196	4.94767	7.5108e-07	8.10432e-06	1.27024	COLON
INTS7	18.7644	3.59776	0.727468	4.9456	7.591e-07	1.00284e-05	1	COLON
CAMKK2	31.1902	3.0825	0.623365	4.94493	7.61704e-07	1.00511e-05	1	COLON
KIZ	31.5751	2.92717	0.592112	4.94361	7.66888e-07	1.01078e-05	1	COLON
SFMBT1	55.6322	-1.28586	0.260514	-4.93584	7.98068e-07	1.0225e-05	1.02753	COLON
RRP1B	31.7055	2.93487	0.594784	4.93435	8.04184e-07	8.58392e-06	1.27024	COLON
ARMT1	15.2274	3.44817	0.699044	4.9327	8.11004e-07	1.06525e-05	1	COLON
HDAC10	27.9704	-2.42244	0.491099	-4.93269	8.11036e-07	1.06525e-05	1	COLON
PDE12	48.8119	1.78832	0.362714	4.93039	8.20673e-07	1.07666e-05	1	COLON
COPG1	50.4037	1.44517	0.293356	4.92633	8.37877e-07	1.09669e-05	1	COLON
UBR7	27.662	1.91	0.387738	4.92601	8.39249e-07	1.09722e-05	1	COLON
PITRM1	51.5748	1.21058	0.24584	4.92426	8.46806e-07	1.07992e-05	1.02753	COLON
SAFB2	147.14	-0.74037	0.150373	-4.92356	8.49853e-07	1.1098e-05	1	COLON
MRPS9	22.107	2.12634	0.431928	4.92289	8.52745e-07	1.1123e-05	1	COLON
LINC-PINT	284.934	-1.46633	0.298007	-4.92044	8.635e-07	1.12503e-05	1	COLON
RTTN	17.6982	3.49885	0.71122	4.9195	8.67663e-07	1.12872e-05	1	COLON
C1orf162	37.2855	-1.24065	0.252198	-4.91935	8.68325e-07	1.12872e-05	1	COLON
ELP4	22.3538	2.02516	0.41184	4.91736	8.77194e-07	1.1872e-05	0.956067	COLON
WDR77	20.3319	3.13803	0.638361	4.91577	8.84356e-07	1.19553e-05	0.956067	COLON
TMEM248	90.7931	0.762227	0.155088	4.91479	8.88767e-07	1.15397e-05	1	COLON
MGAT4A	467.93	0.819152	0.166688	4.91428	8.91106e-07	1.15568e-05	1	COLON
PPP1R12C	61.1971	-1.44372	0.293796	-4.91401	8.92343e-07	1.15597e-05	1	COLON
DCAF6	88.4315	0.857757	0.175005	4.90134	9.51876e-07	1.22887e-05	1	COLON
UNC50	21.9997	3.04561	0.621471	4.90064	9.5524e-07	1.23181e-05	1	COLON
PHKA2	30.5002	1.59699	0.325994	4.89884	9.64026e-07	1.24173e-05	1	COLON
PLEKHM1	47.7553	-1.06919	0.218267	-4.89857	9.65381e-07	1.24207e-05	1	COLON
BTG2	1053.6	0.796677	0.162679	4.89724	9.71914e-07	1.24764e-05	1	COLON
PDE4A	141.114	-0.985645	0.201291	-4.89662	9.74967e-07	1.41368e-05	0.86475	COLON
ARRB1	23.7601	2.96247	0.605213	4.89492	9.83472e-07	1.26105e-05	1	COLON
DRAP1	81.9047	-1.41076	0.288248	-4.89424	9.86888e-07	1.26368e-05	1	COLON
CHM	29.8859	2.83005	0.578991	4.88789	1.0192e-06	1.30244e-05	1	COLON
RGS3	28.0309	2.86539	0.586393	4.88646	1.02666e-06	1.3105e-05	1	COLON
STARD9	104.589	1.10489	0.226158	4.88548	1.03175e-06	1.31551e-05	1	COLON
MEST	19.445	4.25603	0.871948	4.88106	1.05516e-06	1.34234e-05	1	COLON
GSPT1	144.882	-0.794272	0.162768	-4.87977	1.06212e-06	1.34967e-05	1	COLON
TRPV2	47.5189	0.983329	0.201594	4.87776	1.07296e-06	1.3299e-05	1.02753	COLON
SACS	36.8889	2.96158	0.607229	4.87721	1.07597e-06	1.3627e-05	1	COLON
C1orf216	7.50355	4.33938	0.889885	4.87633	1.08075e-06	1.36723e-05	1	COLON
BBX	172.242	0.731817	0.150103	4.87544	1.08567e-06	1.37192e-05	1	COLON
ERMP1	46.5062	1.64098	0.336707	4.8736	1.09582e-06	1.38166e-05	1	COLON
TBRG4	29.55	2.76434	0.5673	4.87281	1.10023e-06	1.38568e-05	1	COLON
RBM34	13.2769	-3.39186	0.696296	-4.8713	1.10867e-06	1.39321e-05	1	COLON
PSMD10	25.7356	2.14005	0.439394	4.87045	1.11343e-06	1.39764e-05	1	COLON
DPH2	14.4625	3.3917	0.69642	4.87019	1.11492e-06	1.45256e-05	0.956067	COLON
NFYA	49.7102	1.33424	0.274101	4.86768	1.12913e-06	1.41422e-05	1	COLON
ACY1	8.75179	-2.66896	0.548416	-4.86668	1.13491e-06	1.41989e-05	1	COLON
CAMK1D	51.2564	-1.33363	0.274083	-4.86579	1.14001e-06	1.42469e-05	1	COLON
DFFA	53.2552	2.81596	0.578939	4.86401	1.15034e-06	1.43602e-05	1	COLON
IFITM2	806.439	-1.70686	0.351054	-4.8621	1.16145e-06	1.4483e-05	1	COLON
HECTD3	32.4955	3.65759	0.752876	4.85816	1.18485e-06	1.47423e-05	1	COLON
GLA	36.9328	1.23373	0.254014	4.85694	1.19211e-06	1.48002e-05	1	COLON
BUD31	62.4831	-1.07224	0.220827	-4.85555	1.20052e-06	1.4872e-05	1	COLON
GCLM	30.2984	-1.38801	0.285939	-4.85421	1.20865e-06	1.49564e-05	1	COLON
PRELID1	60.6911	-1.48633	0.306348	-4.85178	1.22358e-06	1.48e-05	1.02753	COLON
SBNO2	35.6875	-1.81083	0.373247	-4.85157	1.2249e-06	1.5141e-05	1	COLON
NDUFA11	55.8775	-3.10567	0.64024	-4.8508	1.22967e-06	1.51834e-05	1	COLON
KLHL12	29.9618	2.33001	0.480406	4.85008	1.23409e-06	1.24764e-05	1.27024	COLON
OAS2	29.5334	2.72663	0.562562	4.8468	1.25469e-06	1.26368e-05	1.27024	COLON
UBLCP1	48.1077	2.70808	0.559017	4.84435	1.27024e-06	1.56672e-05	1	COLON
DERA	23.8785	2.09032	0.431668	4.84244	1.28256e-06	1.5802e-05	1	COLON
UCP2	414.733	0.862031	0.178049	4.84154	1.28839e-06	1.58565e-05	1	COLON
NISCH	90.2491	0.791091	0.163459	4.8397	1.30033e-06	1.59862e-05	1	COLON
TMEM80	26.1388	3.64614	0.75363	4.8381	1.31087e-06	1.60982e-05	1	COLON
EIF3L	270.008	0.680494	0.14066	4.83788	1.31231e-06	1.83974e-05	0.86475	COLON
TANK	135.463	0.772711	0.159737	4.8374	1.31546e-06	1.84218e-05	0.86475	COLON
FOXRED1	31.206	1.68633	0.348646	4.83679	1.31955e-06	1.61874e-05	1	COLON
CBL	142.491	0.833579	0.172348	4.8366	1.32079e-06	1.84767e-05	0.86475	COLON
MTA3	26.7335	1.5096	0.312125	4.83653	1.32127e-06	1.61909e-05	1	COLON
NCKAP1L	167.334	-0.637884	0.131935	-4.83483	1.33262e-06	1.63123e-05	1	COLON
SLC39A9	38.2753	1.32361	0.273946	4.83164	1.35413e-06	1.35315e-05	1.27024	COLON
WDR36	39.6516	2.78396	0.576314	4.83062	1.36108e-06	1.35857e-05	1.27024	COLON
PCAT1	24.7741	-3.28869	0.681318	-4.82696	1.38635e-06	1.37763e-05	1.27024	COLON
CAD	24.7681	3.2971	0.683068	4.82691	1.38671e-06	1.69379e-05	1	COLON
TRAF3IP2	34.9355	2.68067	0.5556	4.82483	1.40126e-06	1.38781e-05	1.27024	COLON
PLEKHD1	50.0619	-4.50943	0.935063	-4.8226	1.41699e-06	1.68622e-05	1.02753	COLON
CSF1	34.7993	-1.88416	0.390762	-4.82176	1.42295e-06	1.73618e-05	1	COLON
CS	109.693	0.792625	0.164406	4.82114	1.42742e-06	1.73976e-05	1	COLON
MARK2	85.9713	-0.999767	0.207411	-4.82021	1.43408e-06	1.81958e-05	0.958533	COLON
RGS2	224.572	1.29342	0.26839	4.81917	1.44154e-06	1.75509e-05	1	COLON
SMIM3	150.061	-1.06297	0.220767	-4.81491	1.47268e-06	2.02557e-05	0.86475	COLON
ZFAND1	35.6848	2.91632	0.606354	4.8096	1.51235e-06	1.83566e-05	1	COLON
AAAS	26.6287	3.19801	0.664926	4.80957	1.51258e-06	1.83566e-05	1	COLON
GTF2H1	34.3352	1.24535	0.259018	4.80794	1.52491e-06	1.4872e-05	1.27024	COLON
SUPT5H	116.604	-0.868503	0.180706	-4.80618	1.53842e-06	1.85906e-05	1	COLON
DDX3X	945.383	0.577966	0.120298	4.80444	1.55184e-06	1.87137e-05	1	COLON
HLA-DQB1	72.6687	1.63194	0.339673	4.80443	1.55191e-06	1.87137e-05	1	COLON
STUB1	37.4592	-1.2798	0.266506	-4.80216	1.56964e-06	1.89075e-05	1	COLON
UBA3	74.1091	1.3448	0.280147	4.80034	1.58394e-06	1.90595e-05	1	COLON
ACAD11	4.84472	-5.49889	1.14557	-4.80012	1.58574e-06	1.90608e-05	1	COLON
PRR7	16.735	-2.05384	0.427958	-4.79917	1.59327e-06	1.99468e-05	0.956067	COLON
SPCS2	64.6879	-0.867565	0.18085	-4.79715	1.60937e-06	2.00541e-05	0.958533	COLON
BTG3	49.7059	-0.936194	0.195192	-4.79628	1.6164e-06	1.94088e-05	1	COLON
DPYD	92.8082	1.02684	0.21413	4.79539	1.62356e-06	1.94741e-05	1	COLON
YKT6	46.1873	-1.23054	0.256953	-4.78897	1.67638e-06	1.95483e-05	1.02753	COLON
POLG2	43.7714	2.74779	0.573779	4.78894	1.67665e-06	2.00473e-05	1	COLON
MAN2B1	9.5813	-3.30722	0.690687	-4.7883	1.68204e-06	2.24713e-05	0.874699	COLON
DNAJB2	27.8771	-1.90287	0.397407	-4.78822	1.6827e-06	2.00773e-05	1	COLON
PPIL2	42.9783	1.29342	0.270193	4.78703	1.69269e-06	2.01753e-05	1	COLON
CENPT	64.9983	1.10229	0.230285	4.78664	1.69596e-06	2.01929e-05	1	COLON
FAU	743.571	-1.39221	0.290952	-4.78501	1.7098e-06	2.03151e-05	1	COLON
EIF5A	151.28	-1.19375	0.249559	-4.78344	1.72323e-06	2.3135e-05	0.86475	COLON
VILL	29.3374	3.20805	0.670828	4.78222	1.73367e-06	2.05771e-05	1	COLON
ACTG1	1572.85	0.401965	0.0840769	4.78093	1.74488e-06	2.06885e-05	1	COLON
SNAPC5	13.5866	2.44045	0.510819	4.77751	1.77475e-06	2.34919e-05	0.874699	COLON
ACAA2	69.2612	-0.944514	0.197711	-4.77724	1.77716e-06	2.18261e-05	0.958533	COLON
SNAP91	37.8969	3.2262	0.675378	4.77687	1.78043e-06	2.10683e-05	1	COLON
ERVK3-1	28.0502	-1.7447	0.36524	-4.77685	1.78063e-06	2.10683e-05	1	COLON
SLC25A17	20.1735	2.86324	0.599531	4.7758	1.78996e-06	2.11566e-05	1	COLON
INTS8	43.4113	1.42511	0.298512	4.77404	1.8057e-06	2.13204e-05	1	COLON
DYNC2H1	45.1776	1.47478	0.309035	4.77222	1.82209e-06	2.14915e-05	1	COLON
NT5DC1	44.9771	1.08767	0.228086	4.76869	1.8543e-06	2.18261e-05	1	COLON
RAD52	10.2992	3.51335	0.736848	4.76808	1.85994e-06	2.1844e-05	1	COLON
P2RY10	79.6065	0.992829	0.208232	4.7679	1.86161e-06	2.1844e-05	1	COLON
BCKDHB	22.067	1.84393	0.386828	4.76681	1.87166e-06	2.19393e-05	1	COLON
ZNF787	16.6167	-2.30771	0.484299	-4.76505	1.88806e-06	2.20938e-05	1	COLON
ZCCHC17	24.9447	1.69999	0.356768	4.76498	1.88875e-06	2.20938e-05	1	COLON
SNX9	107.291	-1.2496	0.262356	-4.76299	1.90743e-06	2.31344e-05	0.958533	COLON
IMP4	40.8242	2.66219	0.558951	4.76284	1.90892e-06	2.1844e-05	1.02753	COLON
WDR5	21.3596	3.0564	0.642119	4.75986	1.93723e-06	2.26144e-05	1	COLON
IRF4	313.989	0.845977	0.177799	4.75805	1.95471e-06	2.27949e-05	1	COLON
RGS1	2773.52	0.883016	0.185611	4.75735	1.96154e-06	2.28511e-05	1	COLON
CLEC2B	137.049	-1.1242	0.236416	-4.75517	1.9828e-06	2.3075e-05	1	COLON
EHBP1L1	89.1153	-1.35129	0.284211	-4.75455	1.9889e-06	2.39505e-05	0.958533	COLON
CNOT8	86.0046	0.987443	0.207707	4.75402	1.99408e-06	2.3135e-05	1	COLON
UNC119B	34.2693	3.32965	0.700845	4.75091	2.02505e-06	2.34703e-05	1	COLON
LRRN3	60.8589	3.1308	0.65908	4.75026	2.03156e-06	2.34977e-05	1	COLON
HCST	73.6263	-1.96569	0.414144	-4.74639	2.07082e-06	2.39273e-05	1	COLON
ZNF600	43.5763	-1.35185	0.285225	-4.73961	2.14134e-06	2.46919e-05	1	COLON
HHEX	34.8648	1.7994	0.379885	4.73669	2.17237e-06	2.50242e-05	1	COLON
NCKAP5L	15.3912	-1.62364	0.342896	-4.7351	2.18952e-06	2.5175e-05	1	COLON
UNC5C	8.9527	3.88093	0.819845	4.73374	2.2042e-06	2.53137e-05	1	COLON
ACVR2A	50.1702	2.94892	0.62311	4.73258	2.21687e-06	2.54334e-05	1	COLON
PRR14L	91.5463	1.07185	0.226563	4.73093	2.23499e-06	2.56154e-05	1	COLON
B3GAT1	2.04363	-5.59405	1.18384	-4.72535	2.29719e-06	2.62751e-05	1	COLON
STOM	141.191	1.07516	0.227548	4.72498	2.30137e-06	2.62964e-05	1	COLON
ARHGEF10	3.12177	-4.98125	1.05494	-4.72185	2.33714e-06	2.66782e-05	1	COLON
C1orf43	150.479	0.687172	0.145578	4.72029	2.35505e-06	2.68557e-05	1	COLON
INTS2	15.3613	3.17249	0.672099	4.72028	2.35525e-06	2.79235e-05	0.956067	COLON
COMT	40.191	1.57824	0.334492	4.71833	2.37789e-06	2.70888e-05	1	COLON
ANP32B	153.537	-0.841535	0.178393	-4.71732	2.38975e-06	2.71966e-05	1	COLON
SIDT2	20.6266	2.91842	0.618782	4.7164	2.40058e-06	2.83475e-05	0.956067	COLON
AP3M2	17.8848	2.37676	0.504021	4.71561	2.40992e-06	2.83911e-05	0.956067	COLON
SLCO2A1	50.0269	3.10612	0.658695	4.71557	2.41039e-06	2.7404e-05	1	COLON
COPZ1	90.6654	1.19797	0.25408	4.71492	2.41806e-06	2.74636e-05	1	COLON
SLC26A6	14.9036	3.75858	0.797193	4.71477	2.41983e-06	2.84214e-05	0.956067	COLON
VIPAS39	18.6376	3.14245	0.666527	4.71465	2.42121e-06	2.84214e-05	0.956067	COLON
TGFBRAP1	35.2021	1.28859	0.273505	4.71137	2.46054e-06	2.79181e-05	1	COLON
GSR	58.0178	-0.932017	0.197949	-4.70838	2.49694e-06	2.82723e-05	1	COLON
DEDD2	41.5914	2.82703	0.600464	4.70807	2.50072e-06	2.82723e-05	1	COLON
MYOM1	18.9392	2.53471	0.538503	4.70696	2.51437e-06	2.94016e-05	0.956067	COLON
GTF2IRD2B	8.1653	-2.25574	0.479265	-4.70667	2.51802e-06	2.83911e-05	1	COLON
FAM114A1	18.422	2.02285	0.429833	4.70614	2.52454e-06	2.83911e-05	1	COLON
NDUFAF5	25.325	-1.32982	0.282573	-4.70612	2.52476e-06	2.83911e-05	1	COLON
ABCC10	19.1257	2.85353	0.606858	4.70214	2.57449e-06	3.00126e-05	0.956067	COLON
CTSZ	9.47089	-3.05266	0.64924	-4.7019	2.57754e-06	2.88985e-05	1	COLON
ZRANB2	157.852	-0.685484	0.145914	-4.69787	2.62887e-06	2.94016e-05	1	COLON
GTF2A1	24.5754	2.19419	0.46707	4.69777	2.6302e-06	2.94016e-05	1	COLON
NT5C2	89.1187	1.13128	0.240938	4.69531	2.66203e-06	2.97282e-05	1	COLON
TPI1	344.574	-0.736844	0.156969	-4.69421	2.67636e-06	2.98588e-05	1	COLON
CNOT11	29.0102	1.9737	0.420647	4.69205	2.70478e-06	3.00871e-05	1	COLON
SAMHD1	59.4431	1.10618	0.235767	4.69183	2.70772e-06	3.00902e-05	1	COLON
IPO13	15.4405	3.65948	0.780038	4.69141	2.71328e-06	3.01225e-05	1	COLON
POGZ	78.2949	2.01298	0.429128	4.69086	2.72057e-06	3.01739e-05	1	COLON
PPT1	167.994	0.953928	0.203382	4.69033	2.72759e-06	3.02221e-05	1	COLON
LPAR1	54.9279	2.03072	0.433146	4.6883	2.75483e-06	3.04941e-05	1	COLON
ABCD3	34.4339	2.22415	0.474532	4.68704	2.77191e-06	3.06532e-05	1	COLON
USO1	104.758	1.04585	0.223147	4.68684	2.77457e-06	3.17929e-05	0.958533	COLON
NEK10	43.5891	3.31238	0.706793	4.68649	2.77926e-06	3.00871e-05	1.02753	COLON
TMEM223	24.9716	-1.40636	0.3001	-4.68631	2.7817e-06	2.5175e-05	1.27024	COLON
UBE2S	44.9355	-2.14308	0.457455	-4.6848	2.80234e-06	3.09596e-05	1	COLON
PDZD11	17.1608	3.13042	0.668492	4.68281	2.8297e-06	3.12314e-05	1	COLON
DUSP3	36.0273	1.4373	0.306955	4.68245	2.83472e-06	3.12564e-05	1	COLON
HLCS	18.2658	2.95022	0.630097	4.68217	2.83861e-06	3.12688e-05	1	COLON
ZNF627	10.3207	3.87921	0.828823	4.68038	2.86343e-06	3.15116e-05	1	COLON
FBRS	56.8609	-1.02271	0.218557	-4.67939	2.87727e-06	3.16332e-05	1	COLON
ALS2	27.3856	3.4764	0.743332	4.67678	2.91412e-06	2.62668e-05	1.27024	COLON
HMGA1	50.9146	-1.38164	0.295613	-4.6738	2.95675e-06	3.24127e-05	1	COLON
PTPN13	69.9556	1.61107	0.34485	4.67181	2.98561e-06	3.26975e-05	1	COLON
RAB5C	62.7247	-0.994801	0.212996	-4.67052	3.00436e-06	3.20831e-05	1.02753	COLON
NACC1	17.9856	-2.87417	0.615662	-4.66842	3.03524e-06	3.31769e-05	1	COLON
PAICS	19.7238	2.94703	0.631601	4.66597	3.07168e-06	3.48826e-05	0.956067	COLON
TRABD	84.0379	-1.0104	0.216581	-4.66523	3.08265e-06	3.36564e-05	1	COLON
CXorf21	55.5674	2.21445	0.474688	4.66507	3.08505e-06	3.36564e-05	1	COLON
CFL1	1028.38	-1.00055	0.214717	-4.65986	3.16431e-06	3.44879e-05	1	COLON
SH2D1B	168.217	0.983979	0.211193	4.65914	3.1753e-06	3.45745e-05	1	COLON
TSEN15	26.574	1.78499	0.383128	4.65898	3.1778e-06	2.82723e-05	1.27024	COLON
GABPA	24.7622	3.54728	0.76149	4.65835	3.18755e-06	3.46746e-05	1	COLON
SNRNP25	12.5214	3.289	0.706076	4.65813	3.19092e-06	3.46779e-05	1	COLON
EFL1	20.3015	2.77042	0.595393	4.65309	3.27005e-06	3.54467e-05	1	COLON
SQSTM1	261.757	-0.68383	0.146965	-4.65302	3.27104e-06	3.54467e-05	1	COLON
BCKDK	25.2261	3.26272	0.701269	4.65259	3.27787e-06	3.54868e-05	1	COLON
DCLRE1C	36.9657	2.34914	0.504949	4.65225	3.2834e-06	3.55128e-05	1	COLON
WASHC5	36.685	1.90744	0.41011	4.65104	3.30259e-06	3.56541e-05	1	COLON
MUS81	37.7884	1.82498	0.392382	4.65103	3.30276e-06	3.56541e-05	1	COLON
CBX4	89.9308	-1.22798	0.264235	-4.64733	3.36259e-06	3.62655e-05	1	COLON
STK35	12.4804	1.98474	0.427106	4.64696	3.3687e-06	4.06464e-05	0.874699	COLON
STRBP	52.232	1.52406	0.328063	4.64564	3.39032e-06	3.65297e-05	1	COLON
LBH	26.3468	2.87448	0.618785	4.64536	3.39482e-06	3.65435e-05	1	COLON
RPS17	287.108	-0.952183	0.204993	-4.64495	3.40151e-06	3.65807e-05	1	COLON
SKP1	443.198	-0.477134	0.102756	-4.64335	3.42798e-06	3.68291e-05	1	COLON
ARGLU1	342.364	-0.484576	0.104363	-4.64317	3.4311e-06	3.68291e-05	1	COLON
SCAPER	119.523	1.25027	0.269326	4.64223	3.44665e-06	3.69316e-05	1	COLON
TXNDC15	58.4845	1.17987	0.254162	4.6422	3.44716e-06	3.69316e-05	1	COLON
CHD9	236.656	0.752146	0.162069	4.6409	3.46894e-06	3.71298e-05	1	COLON
GRASP	52.9286	-2.09363	0.45135	-4.63858	3.50806e-06	3.74777e-05	1	COLON
PPM1G	71.4001	0.846226	0.182479	4.63739	3.52841e-06	3.76596e-05	1	COLON
TMEM254	16.4102	3.65121	0.787597	4.63589	3.55404e-06	3.78975e-05	1	COLON
AACS	25.9626	2.21414	0.47788	4.63325	3.59974e-06	3.83128e-05	1	COLON
GPD1L	54.8435	2.58532	0.558041	4.63285	3.60668e-06	3.83506e-05	1	COLON
PRKCA	132.023	1.04372	0.225314	4.63229	3.61643e-06	3.84182e-05	1	COLON
NPIPB15	15.3216	-4.21509	0.910225	-4.63082	3.64224e-06	4.0244e-05	0.956067	COLON
GYS1	25.3799	2.89374	0.625022	4.62982	3.65976e-06	3.88281e-05	1	COLON
CASP3	334.74	0.66985	0.144685	4.62971	3.66186e-06	3.88281e-05	1	COLON
HSDL1	24.4945	3.38747	0.731847	4.62865	3.68057e-06	3.899e-05	1	COLON
KARS	109.406	0.849497	0.183616	4.62648	3.71932e-06	3.93582e-05	1	COLON
BAZ1A	145.572	-0.736148	0.159122	-4.62632	3.72228e-06	3.93582e-05	1	COLON
RFWD3	36.7262	2.8555	0.617841	4.62175	3.80526e-06	3.27763e-05	1.27024	COLON
USP40	19.5517	3.24014	0.701797	4.61692	3.89483e-06	4.10296e-05	1	COLON
CANX	345	0.51914	0.112497	4.6147	3.93656e-06	4.13923e-05	1	COLON
COQ9	14.9619	3.08015	0.667872	4.61189	3.99018e-06	4.35608e-05	0.956067	COLON
MRPL45	20.3658	2.71759	0.589442	4.61044	4.01827e-06	4.2139e-05	1	COLON
MX2	43.8988	-1.43826	0.311958	-4.61041	4.01873e-06	4.2139e-05	1	COLON
RNF26	14.0002	3.33298	0.722979	4.61007	4.02535e-06	4.21694e-05	1	COLON
TRMT12	13.3698	3.12293	0.67746	4.60976	4.03132e-06	4.74917e-05	0.874699	COLON
EBAG9	22.9276	3.13753	0.680653	4.60958	4.03479e-06	4.38862e-05	0.956067	COLON
AFAP1L1	79.2004	1.04907	0.227702	4.60722	4.08092e-06	4.27121e-05	1	COLON
SCAND1	57.0915	-1.49775	0.325108	-4.60693	4.08658e-06	4.17796e-05	1.02753	COLON
COX19	37.7374	-1.25741	0.273133	-4.60365	4.15157e-06	4.3384e-05	1	COLON
STAMBP	33.7501	2.63709	0.572833	4.60359	4.15277e-06	4.3384e-05	1	COLON
CDC16	91.0193	1.12815	0.24521	4.60073	4.21011e-06	4.38377e-05	1	COLON
SFPQ	578.901	-0.46664	0.101429	-4.60065	4.21167e-06	4.38377e-05	1	COLON
SASH3	160.254	0.844423	0.183633	4.59843	4.25689e-06	4.42272e-05	1	COLON
HDAC5	41.2933	2.73384	0.594809	4.59617	4.30333e-06	4.36718e-05	1.02753	COLON
MYCBP	17.1461	2.08994	0.454905	4.59423	4.34354e-06	4.69002e-05	0.956067	COLON
LARS2	19.5282	2.44883	0.533205	4.59266	4.3764e-06	4.54272e-05	1	COLON
SAMD12	27.6421	1.35045	0.294072	4.59225	4.38487e-06	4.54734e-05	1	COLON
MFSD11	27.9217	2.01159	0.438313	4.5894	4.44522e-06	3.74217e-05	1.27024	COLON
C2orf42	20.2925	3.22041	0.702054	4.58713	4.49386e-06	4.64762e-05	1	COLON
MFSD12	34.1395	-1.34459	0.293215	-4.58567	4.52526e-06	3.79523e-05	1.27024	COLON
FAM114A2	22.8435	2.85222	0.622044	4.58524	4.5347e-06	4.68558e-05	1	COLON
TOGARAM1	40.7163	1.74925	0.381571	4.58432	4.55469e-06	4.59269e-05	1.02753	COLON
FANCG	13.6277	3.17237	0.69228	4.58249	4.59478e-06	4.73902e-05	1	COLON
ZMIZ1	146.395	0.629487	0.137505	4.57792	4.69613e-06	5.45226e-05	0.86475	COLON
MPHOSPH9	78.7633	1.10947	0.242402	4.57698	4.71732e-06	4.85657e-05	1	COLON
LACC1	38.6665	1.41569	0.309365	4.57612	4.73681e-06	4.87221e-05	1	COLON
PGP	47.225	-1.59125	0.347835	-4.57472	4.76855e-06	4.90041e-05	1	COLON
RNF2	29.1115	1.59792	0.349406	4.57324	4.80229e-06	4.93061e-05	1	COLON
RHEB	69.1183	-0.939318	0.20554	-4.56999	4.87741e-06	4.99868e-05	1	COLON
SERGEF	13.4055	2.93318	0.641867	4.56976	4.8829e-06	4.99979e-05	1	COLON
ARHGAP15	167.225	0.665919	0.145749	4.56893	4.90213e-06	5.01495e-05	1	COLON
SYNE1	104.88	0.995518	0.217902	4.56865	4.90869e-06	5.19668e-05	0.958533	COLON
NDUFA7	11.8266	-3.45424	0.75612	-4.56838	4.91519e-06	5.02378e-05	1	COLON
TARS2	26.1399	3.16387	0.692714	4.56735	4.93933e-06	4.10011e-05	1.27024	COLON
C6orf62	357.076	1.02586	0.224659	4.56629	4.96428e-06	5.74324e-05	0.86475	COLON
RNF14	29.7707	2.89254	0.633477	4.56613	4.96806e-06	4.1163e-05	1.27024	COLON
COX15	16.8099	3.20047	0.700949	4.5659	4.97347e-06	5.07419e-05	1	COLON
MRPS18B	43.3754	2.81017	0.615504	4.56564	4.97984e-06	4.9714e-05	1.02753	COLON
MRPL50	18.3081	2.78145	0.609223	4.56557	4.98142e-06	5.25904e-05	0.956067	COLON
RPL34	1692.63	-1.38396	0.303135	-4.56548	4.98345e-06	5.07886e-05	1	COLON
CYTH1	239.11	-0.64209	0.140693	-4.56376	5.02455e-06	5.1125e-05	1	COLON
LARP1	165.656	-0.637236	0.1397	-4.56145	5.08018e-06	5.16391e-05	1	COLON
RBM15B	36.2697	1.62583	0.356442	4.56128	5.08419e-06	5.16391e-05	1	COLON
USP37	56.7201	1.10504	0.242268	4.56123	5.08547e-06	5.05398e-05	1.02753	COLON
TSG101	51.6906	1.86863	0.409946	4.55823	5.15874e-06	5.23026e-05	1	COLON
EMC2	21.7299	2.26416	0.496789	4.5576	5.17412e-06	5.24117e-05	1	COLON
NAAA	37.029	2.5456	0.558568	4.55737	5.17974e-06	5.24218e-05	1	COLON
E2F1	2.85634	-3.84777	0.844458	-4.5565	5.20134e-06	5.25904e-05	1	COLON
EIF2AK1	92.9856	0.789741	0.173335	4.55616	5.20972e-06	5.25904e-05	1	COLON
SMARCA2	415.997	-0.589621	0.129415	-4.55606	5.21222e-06	5.98781e-05	0.86475	COLON
ZNF146	38.7379	1.28564	0.282369	4.55305	5.28738e-06	5.33206e-05	1	COLON
ELP3	50.5278	1.85558	0.407781	4.55043	5.35358e-06	5.39403e-05	1	COLON
MRS2	25.0258	3.09719	0.680846	4.54903	5.3894e-06	5.4253e-05	1	COLON
PIGL	29.2909	2.8037	0.616478	4.54792	5.41777e-06	5.44902e-05	1	COLON
ANO8	17.4473	-2.45023	0.538798	-4.54759	5.42639e-06	5.45226e-05	1	COLON
CD244	9.17909	3.17863	0.699888	4.54163	5.58213e-06	5.59941e-05	1	COLON
RCAN1	37.0589	2.20573	0.485914	4.53935	5.64285e-06	5.65532e-05	1	COLON
TTI1	27.0951	1.65598	0.364894	4.53824	5.67267e-06	4.62285e-05	1.27024	COLON
TMEM71	42.8787	2.74273	0.604546	4.53684	5.71022e-06	5.71779e-05	1	COLON
BBS9	23.5305	2.85181	0.62892	4.53445	5.77525e-06	5.77271e-05	1	COLON
BRPF3	21.9024	2.6234	0.578704	4.53323	5.80884e-06	5.80116e-05	1	COLON
HSPA2	23.0557	2.46121	0.543083	4.53192	5.84504e-06	5.83218e-05	1	COLON
MRPS22	24.3937	2.81802	0.621973	4.53078	5.87674e-06	5.85865e-05	1	COLON
CYB5R4	36.8916	2.75641	0.608417	4.53046	5.88551e-06	5.86224e-05	1	COLON
LENG9	23.7013	-3.79617	0.837925	-4.53044	5.88605e-06	6.10535e-05	0.956067	COLON
LSG1	48.008	1.95934	0.432576	4.52946	5.9135e-06	5.88494e-05	1	COLON
CTDNEP1	75.3546	-1.38564	0.306188	-4.52546	6.02632e-06	5.98781e-05	1	COLON
PPP2R2A	89.085	-0.775148	0.171368	-4.52329	6.08849e-06	6.04317e-05	1	COLON
ARHGEF40	27.2963	2.7282	0.603493	4.52068	6.16426e-06	6.10768e-05	1	COLON
ANKRD36C	125.096	-0.633114	0.140056	-4.52042	6.17175e-06	6.10976e-05	1	COLON
BTNL9	9.16819	-5.33233	1.17979	-4.51972	6.19229e-06	6.12475e-05	1	COLON
GMEB2	14.1858	3.74989	0.8301	4.5174	6.2605e-06	6.18681e-05	1	COLON
[truncated: 44,590 more rows]

## Sheet: ILC3_c2
gene_id	baseMean	log2FoldChange	lfcSE	stat	pvalue	padj	weight	comparison
[truncated: 34,056 more rows]

[truncated: 4 more sheets: ILC3_c3, ILC3_c4, NK_c1, NK_c2]
