# Supplementary material for: Tissue specific imprinting on innate lymphoid cells during homeostasis and disease process revealed by integrative inference of single-cell transcriptomics
Source: Frontiers journal article supplement (doi:10.3389/fimmu.2023.1127413), 2023-03-07
Supplement: Table_1.DOCX [file Table_1.DOCX]

| **Author** | **Year** | **Tissue** | **No. of sample** | **ILC types** | **Platform** | **Dataset** |
| --- | --- | --- | --- | --- | --- | --- |
| Mazzurana *et al*.a | 2021 | Lung | 4 | CD127+ ILCs  CD56dimCD16+ NK cells | Smart-seq2 | GSE150050 |
| Mazzurana *et al*.b | 2021 | Blood | 3 | CD3-CD127+ ILCs | Smart-seq2 | GSE150050 |
| Mazzurana *et al*.b | 2021 | Colon | 3 | CD3-CD127+ ILCs  CD56+ NK cells | Smart-seq2 | GSE150050 |
| Björklund *et al*.c | 2021 | Tonsil | 3 | CD127+ ILCs  CD56 bright NKG2A+NK cells | Smart-seq2 | GSE150050/GSE70580 |
| Heinrich *et al*.d | 2021 | Hepatocellular carcinoma | 1 | CD127+CRTH2-c-Kit-NKp44- ILC1s  CD127+CRTH2+c-Kit-/+ILC2s  CD127+CRTH2-c-Kit+NKp44-/+ ILC3s | 10x Genomics | GSE179795 |
| Krabbendam *et al*.e | 2021 | Inflamed ileum | 6 | CD127+ ILCs  CD94+NK cells | CEL-Seq2 | GSE173642 |

**Supplementary Table1:** Characteristics of including studies in this integrative study.

Lineage (lin) cocktail contained the following antibodies:

aLin: CD1a, CD14, CD19, CD3, CD34, CD94, CD123, BDCA2, FcεR1, TCRαβ, TCRγδ

bLin: CD1a, CD14, CD19, CD34, CD94, CD123, BDCA2, FcεR1, TCRαβ, TCRγδ

cLin: CD1a, CD14, CD19, CD3, CD34, CD123, BDCA2, FcεRIα, TCRα/β, TCRγ/δ

dLin: CD1a, CD34, CD3, TCRα/β, TCRγ/δ, CD14, CD19, CD16, CD94, CD123, BDCA2, FCeR1a

eLin: CD1a, CD3, CD4, CD5, CD14, CD19, CD34, CD123, CRTH2, BDCA2, TCRαβ, TCRγδ, and FcER1α
